# Supplementary material for: High potency of sequential therapy with only β-lactam antibiotics
Source: eLife. 2021 Jul 28;10:e68876. doi: 10.7554/eLife.68876 (PMC8456660; doi:10.7554/eLife.68876)
Supplement: Figure 1—figure supplement 1—source data 1. [file elife-68876-fig1-figsupp1-data1.xlsx]

## Sheet: Fig_S1
evoexp	ab	conc	dilution	mean	sd	ci95	ic75	model_conc	model_growth
2	CIP	0	0	100.156	7.243	6.349	0	0	100
2	CIP	0	0	100.156	7.243	6.349	0	0.000454545	100
2	CIP	0	0	100.156	7.243	6.349	0	0.000909091	100
2	CIP	0	0	100.156	7.243	6.349	0	0.00136364	100
2	CIP	0	0	100.156	7.243	6.349	0	0.00181818	100
2	CIP	0	0	100.156	7.243	6.349	0	0.00227273	100
2	CIP	0	0	100.156	7.243	6.349	0	0.00272727	100
2	CIP	0	0	100.156	7.243	6.349	0	0.00318182	100
2	CIP	0	0	100.156	7.243	6.349	0	0.00363636	100
2	CIP	0	0	100.156	7.243	6.349	0	0.00409091	100
2	CIP	0	0	100.156	7.243	6.349	0	0.00454545	100
2	CIP	0	0	100.156	7.243	6.349	0	0.005	100
2	CIP	0	0	100.156	7.243	6.349	0	0.00545455	100
2	CIP	0	0	100.156	7.243	6.349	0	0.00590909	100
2	CIP	0	0	100.156	7.243	6.349	0	0.00636364	100
2	CIP	0	0	100.156	7.243	6.349	0	0.00681818	100
2	CIP	0	0	100.156	7.243	6.349	0	0.00727273	100
2	CIP	0	0	100.156	7.243	6.349	0	0.00772727	100
2	CIP	0	0	100.156	7.243	6.349	0	0.00818182	100
2	CIP	0	0	100.156	7.243	6.349	0	0.00863636	100
2	CIP	0	0	100.156	7.243	6.349	0	0.00909091	100
2	CIP	0	0	100.156	7.243	6.349	0	0.00954545	100
2	CIP	0	0	100.156	7.243	6.349	0	0.01	100
2	CIP	0	0	100.156	7.243	6.349	0	0.0104545	100
2	CIP	0	0	100.156	7.243	6.349	0	0.0109091	100
2	CIP	0	0	100.156	7.243	6.349	0	0.0113636	100
2	CIP	0	0	100.156	7.243	6.349	0	0.0118182	100
2	CIP	0	0	100.156	7.243	6.349	0	0.0122727	100
2	CIP	0	0	100.156	7.243	6.349	0	0.0127273	100
2	CIP	0	0	100.156	7.243	6.349	0	0.0131818	100
2	CIP	0	0	100.156	7.243	6.349	0	0.0136364	100
2	CIP	0	0	100.156	7.243	6.349	0	0.0140909	100
2	CIP	0	0	100.156	7.243	6.349	0	0.0145455	100
2	CIP	0	0	100.156	7.243	6.349	0	0.015	100
2	CIP	0	0	100.156	7.243	6.349	0	0.0154545	100
2	CIP	0	0	100.156	7.243	6.349	0	0.0159091	100
2	CIP	0	0	100.156	7.243	6.349	0	0.0163636	100
2	CIP	0	0	100.156	7.243	6.349	0	0.0168182	100
2	CIP	0	0	100.156	7.243	6.349	0	0.0172727	100
2	CIP	0	0	100.156	7.243	6.349	0	0.0177273	100
2	CIP	0	0	100.156	7.243	6.349	0	0.0181818	100
2	CIP	0	0	100.156	7.243	6.349	0	0.0186364	100
2	CIP	0	0	100.156	7.243	6.349	0	0.0190909	100
2	CIP	0	0	100.156	7.243	6.349	0	0.0195455	100
2	CIP	0	0	100.156	7.243	6.349	0	0.02	100
2	CIP	0	0	100.156	7.243	6.349	0	0.0204545	100
2	CIP	0	0	100.156	7.243	6.349	0	0.0209091	100
2	CIP	0	0	100.156	7.243	6.349	0	0.0213636	100
2	CIP	0	0	100.156	7.243	6.349	0	0.0218182	100
2	CIP	0	0	100.156	7.243	6.349	0	0.0222727	100
2	CIP	0	0	100.156	7.243	6.349	0	0.0227273	100
2	CIP	0	0	100.156	7.243	6.349	0	0.0231818	100
2	CIP	0	0	100.156	7.243	6.349	0	0.0236364	100
2	CIP	0	0	100.156	7.243	6.349	0	0.0240909	100
2	CIP	0	0	100.156	7.243	6.349	0	0.0245455	99
2	CIP	0	0	100.156	7.243	6.349	0	0.025	99
2	CIP	0	0	100.156	7.243	6.349	0	0.0254545	99
2	CIP	0	0	100.156	7.243	6.349	0	0.0259091	99
2	CIP	0	0	100.156	7.243	6.349	0	0.0263636	98
2	CIP	0	0	100.156	7.243	6.349	0	0.0268182	98
2	CIP	0	0	100.156	7.243	6.349	0	0.0272727	97
2	CIP	0	0	100.156	7.243	6.349	0	0.0277273	97
2	CIP	0	0	100.156	7.243	6.349	0	0.0281818	96
2	CIP	0	0	100.156	7.243	6.349	0	0.0286364	95
2	CIP	0	0	100.156	7.243	6.349	0	0.0290909	94
2	CIP	0	0	100.156	7.243	6.349	0	0.0295455	92
2	CIP	0	0	100.156	7.243	6.349	0	0.03	91
2	CIP	0	0	100.156	7.243	6.349	0	0.0304545	89
2	CIP	0	0	100.156	7.243	6.349	0	0.0309091	87
2	CIP	0	0	100.156	7.243	6.349	0	0.0313636	84
2	CIP	0	0	100.156	7.243	6.349	0	0.0318182	82
2	CIP	0	0	100.156	7.243	6.349	0	0.0322727	79
2	CIP	0	0	100.156	7.243	6.349	0	0.0327273	75
2	CIP	0	0	100.156	7.243	6.349	0	0.0331818	72
2	CIP	0	0	100.156	7.243	6.349	0	0.0336364	69
2	CIP	0	0	100.156	7.243	6.349	0	0.0340909	65
2	CIP	0	0	100.156	7.243	6.349	0	0.0345455	61
2	CIP	0	0	100.156	7.243	6.349	0	0.035	57
2	CIP	0	0	100.156	7.243	6.349	0	0.0354545	54
2	CIP	0	0	100.156	7.243	6.349	0	0.0359091	50
2	CIP	0	0	100.156	7.243	6.349	0	0.0363636	47
2	CIP	0	0	100.156	7.243	6.349	0	0.0368182	44
2	CIP	0	0	100.156	7.243	6.349	0	0.0372727	41
2	CIP	0	0	100.156	7.243	6.349	0	0.0377273	38
2	CIP	0	0	100.156	7.243	6.349	0	0.0381818	35
2	CIP	0	0	100.156	7.243	6.349	0	0.0386364	33
2	CIP	0	0	100.156	7.243	6.349	0	0.0390909	31
2	CIP	0	0	100.156	7.243	6.349	0	0.0395455	29
2	CIP	0	0	100.156	7.243	6.349	0	0.04	28
2	CIP	0	0	100.156	7.243	6.349	0	0.0404545	26
2	CIP	0	0	100.156	7.243	6.349	0	0.0409091	25
2	CIP	0	0	100.156	7.243	6.349	0	0.0413636	24
2	CIP	0	0	100.156	7.243	6.349	0	0.0418182	23
2	CIP	0	0	100.156	7.243	6.349	0	0.0422727	22
2	CIP	0	0	100.156	7.243	6.349	0	0.0427273	21
2	CIP	0	0	100.156	7.243	6.349	0	0.0431818	20
2	CIP	0	0	100.156	7.243	6.349	0	0.0436364	20
2	CIP	0	0	100.156	7.243	6.349	0	0.0440909	19
2	CIP	0	0	100.156	7.243	6.349	0	0.0445455	19
2	CIP	0	0	100.156	7.243	6.349	0	0.045	19
2	CIP	0.0395	4	29.688	3.563	2.851	0	0	100
2	CIP	0.0395	4	29.688	3.563	2.851	0	0.000454545	100
2	CIP	0.0395	4	29.688	3.563	2.851	0	0.000909091	100
2	CIP	0.0395	4	29.688	3.563	2.851	0	0.00136364	100
2	CIP	0.0395	4	29.688	3.563	2.851	0	0.00181818	100
2	CIP	0.0395	4	29.688	3.563	2.851	0	0.00227273	100
2	CIP	0.0395	4	29.688	3.563	2.851	0	0.00272727	100
2	CIP	0.0395	4	29.688	3.563	2.851	0	0.00318182	100
2	CIP	0.0395	4	29.688	3.563	2.851	0	0.00363636	100
2	CIP	0.0395	4	29.688	3.563	2.851	0	0.00409091	100
2	CIP	0.0395	4	29.688	3.563	2.851	0	0.00454545	100
2	CIP	0.0395	4	29.688	3.563	2.851	0	0.005	100
2	CIP	0.0395	4	29.688	3.563	2.851	0	0.00545455	100
2	CIP	0.0395	4	29.688	3.563	2.851	0	0.00590909	100
2	CIP	0.0395	4	29.688	3.563	2.851	0	0.00636364	100
2	CIP	0.0395	4	29.688	3.563	2.851	0	0.00681818	100
2	CIP	0.0395	4	29.688	3.563	2.851	0	0.00727273	100
2	CIP	0.0395	4	29.688	3.563	2.851	0	0.00772727	100
2	CIP	0.0395	4	29.688	3.563	2.851	0	0.00818182	100
2	CIP	0.0395	4	29.688	3.563	2.851	0	0.00863636	100
2	CIP	0.0395	4	29.688	3.563	2.851	0	0.00909091	100
2	CIP	0.0395	4	29.688	3.563	2.851	0	0.00954545	100
2	CIP	0.0395	4	29.688	3.563	2.851	0	0.01	100
2	CIP	0.0395	4	29.688	3.563	2.851	0	0.0104545	100
2	CIP	0.0395	4	29.688	3.563	2.851	0	0.0109091	100
2	CIP	0.0395	4	29.688	3.563	2.851	0	0.0113636	100
2	CIP	0.0395	4	29.688	3.563	2.851	0	0.0118182	100
2	CIP	0.0395	4	29.688	3.563	2.851	0	0.0122727	100
2	CIP	0.0395	4	29.688	3.563	2.851	0	0.0127273	100
2	CIP	0.0395	4	29.688	3.563	2.851	0	0.0131818	100
2	CIP	0.0395	4	29.688	3.563	2.851	0	0.0136364	100
2	CIP	0.0395	4	29.688	3.563	2.851	0	0.0140909	100
2	CIP	0.0395	4	29.688	3.563	2.851	0	0.0145455	100
2	CIP	0.0395	4	29.688	3.563	2.851	0	0.015	100
2	CIP	0.0395	4	29.688	3.563	2.851	0	0.0154545	100
2	CIP	0.0395	4	29.688	3.563	2.851	0	0.0159091	100
2	CIP	0.0395	4	29.688	3.563	2.851	0	0.0163636	100
2	CIP	0.0395	4	29.688	3.563	2.851	0	0.0168182	100
2	CIP	0.0395	4	29.688	3.563	2.851	0	0.0172727	100
2	CIP	0.0395	4	29.688	3.563	2.851	0	0.0177273	100
2	CIP	0.0395	4	29.688	3.563	2.851	0	0.0181818	100
2	CIP	0.0395	4	29.688	3.563	2.851	0	0.0186364	100
2	CIP	0.0395	4	29.688	3.563	2.851	0	0.0190909	100
2	CIP	0.0395	4	29.688	3.563	2.851	0	0.0195455	100
2	CIP	0.0395	4	29.688	3.563	2.851	0	0.02	100
2	CIP	0.0395	4	29.688	3.563	2.851	0	0.0204545	100
2	CIP	0.0395	4	29.688	3.563	2.851	0	0.0209091	100
2	CIP	0.0395	4	29.688	3.563	2.851	0	0.0213636	100
2	CIP	0.0395	4	29.688	3.563	2.851	0	0.0218182	100
2	CIP	0.0395	4	29.688	3.563	2.851	0	0.0222727	100
2	CIP	0.0395	4	29.688	3.563	2.851	0	0.0227273	100
2	CIP	0.0395	4	29.688	3.563	2.851	0	0.0231818	100
2	CIP	0.0395	4	29.688	3.563	2.851	0	0.0236364	100
2	CIP	0.0395	4	29.688	3.563	2.851	0	0.0240909	100
2	CIP	0.0395	4	29.688	3.563	2.851	0	0.0245455	99
2	CIP	0.0395	4	29.688	3.563	2.851	0	0.025	99
2	CIP	0.0395	4	29.688	3.563	2.851	0	0.0254545	99
2	CIP	0.0395	4	29.688	3.563	2.851	0	0.0259091	99
2	CIP	0.0395	4	29.688	3.563	2.851	0	0.0263636	98
2	CIP	0.0395	4	29.688	3.563	2.851	0	0.0268182	98
2	CIP	0.0395	4	29.688	3.563	2.851	0	0.0272727	97
2	CIP	0.0395	4	29.688	3.563	2.851	0	0.0277273	97
2	CIP	0.0395	4	29.688	3.563	2.851	0	0.0281818	96
2	CIP	0.0395	4	29.688	3.563	2.851	0	0.0286364	95
2	CIP	0.0395	4	29.688	3.563	2.851	0	0.0290909	94
2	CIP	0.0395	4	29.688	3.563	2.851	0	0.0295455	92
2	CIP	0.0395	4	29.688	3.563	2.851	0	0.03	91
2	CIP	0.0395	4	29.688	3.563	2.851	0	0.0304545	89
2	CIP	0.0395	4	29.688	3.563	2.851	0	0.0309091	87
2	CIP	0.0395	4	29.688	3.563	2.851	0	0.0313636	84
2	CIP	0.0395	4	29.688	3.563	2.851	0	0.0318182	82
2	CIP	0.0395	4	29.688	3.563	2.851	0	0.0322727	79
2	CIP	0.0395	4	29.688	3.563	2.851	0	0.0327273	75
2	CIP	0.0395	4	29.688	3.563	2.851	0	0.0331818	72
2	CIP	0.0395	4	29.688	3.563	2.851	0	0.0336364	69
2	CIP	0.0395	4	29.688	3.563	2.851	0	0.0340909	65
2	CIP	0.0395	4	29.688	3.563	2.851	0	0.0345455	61
2	CIP	0.0395	4	29.688	3.563	2.851	0	0.035	57
2	CIP	0.0395	4	29.688	3.563	2.851	0	0.0354545	54
2	CIP	0.0395	4	29.688	3.563	2.851	0	0.0359091	50
2	CIP	0.0395	4	29.688	3.563	2.851	0	0.0363636	47
2	CIP	0.0395	4	29.688	3.563	2.851	0	0.0368182	44
2	CIP	0.0395	4	29.688	3.563	2.851	0	0.0372727	41
2	CIP	0.0395	4	29.688	3.563	2.851	0	0.0377273	38
2	CIP	0.0395	4	29.688	3.563	2.851	0	0.0381818	35
2	CIP	0.0395	4	29.688	3.563	2.851	0	0.0386364	33
2	CIP	0.0395	4	29.688	3.563	2.851	0	0.0390909	31
2	CIP	0.0395	4	29.688	3.563	2.851	0	0.0395455	29
2	CIP	0.0395	4	29.688	3.563	2.851	0	0.04	28
2	CIP	0.0395	4	29.688	3.563	2.851	0	0.0404545	26
2	CIP	0.0395	4	29.688	3.563	2.851	0	0.0409091	25
2	CIP	0.0395	4	29.688	3.563	2.851	0	0.0413636	24
2	CIP	0.0395	4	29.688	3.563	2.851	0	0.0418182	23
2	CIP	0.0395	4	29.688	3.563	2.851	0	0.0422727	22
2	CIP	0.0395	4	29.688	3.563	2.851	0	0.0427273	21
2	CIP	0.0395	4	29.688	3.563	2.851	0	0.0431818	20
2	CIP	0.0395	4	29.688	3.563	2.851	0	0.0436364	20
2	CIP	0.0395	4	29.688	3.563	2.851	0	0.0440909	19
2	CIP	0.0395	4	29.688	3.563	2.851	0	0.0445455	19
2	CIP	0.0395	4	29.688	3.563	2.851	0	0.045	19
2	CIP	0.0405	5	23.698	3.402	2.722	1	0	100
2	CIP	0.0405	5	23.698	3.402	2.722	1	0.000454545	100
2	CIP	0.0405	5	23.698	3.402	2.722	1	0.000909091	100
2	CIP	0.0405	5	23.698	3.402	2.722	1	0.00136364	100
2	CIP	0.0405	5	23.698	3.402	2.722	1	0.00181818	100
2	CIP	0.0405	5	23.698	3.402	2.722	1	0.00227273	100
2	CIP	0.0405	5	23.698	3.402	2.722	1	0.00272727	100
2	CIP	0.0405	5	23.698	3.402	2.722	1	0.00318182	100
2	CIP	0.0405	5	23.698	3.402	2.722	1	0.00363636	100
2	CIP	0.0405	5	23.698	3.402	2.722	1	0.00409091	100
2	CIP	0.0405	5	23.698	3.402	2.722	1	0.00454545	100
2	CIP	0.0405	5	23.698	3.402	2.722	1	0.005	100
2	CIP	0.0405	5	23.698	3.402	2.722	1	0.00545455	100
2	CIP	0.0405	5	23.698	3.402	2.722	1	0.00590909	100
2	CIP	0.0405	5	23.698	3.402	2.722	1	0.00636364	100
2	CIP	0.0405	5	23.698	3.402	2.722	1	0.00681818	100
2	CIP	0.0405	5	23.698	3.402	2.722	1	0.00727273	100
2	CIP	0.0405	5	23.698	3.402	2.722	1	0.00772727	100
2	CIP	0.0405	5	23.698	3.402	2.722	1	0.00818182	100
2	CIP	0.0405	5	23.698	3.402	2.722	1	0.00863636	100
2	CIP	0.0405	5	23.698	3.402	2.722	1	0.00909091	100
2	CIP	0.0405	5	23.698	3.402	2.722	1	0.00954545	100
2	CIP	0.0405	5	23.698	3.402	2.722	1	0.01	100
2	CIP	0.0405	5	23.698	3.402	2.722	1	0.0104545	100
2	CIP	0.0405	5	23.698	3.402	2.722	1	0.0109091	100
2	CIP	0.0405	5	23.698	3.402	2.722	1	0.0113636	100
2	CIP	0.0405	5	23.698	3.402	2.722	1	0.0118182	100
2	CIP	0.0405	5	23.698	3.402	2.722	1	0.0122727	100
2	CIP	0.0405	5	23.698	3.402	2.722	1	0.0127273	100
2	CIP	0.0405	5	23.698	3.402	2.722	1	0.0131818	100
2	CIP	0.0405	5	23.698	3.402	2.722	1	0.0136364	100
2	CIP	0.0405	5	23.698	3.402	2.722	1	0.0140909	100
2	CIP	0.0405	5	23.698	3.402	2.722	1	0.0145455	100
2	CIP	0.0405	5	23.698	3.402	2.722	1	0.015	100
2	CIP	0.0405	5	23.698	3.402	2.722	1	0.0154545	100
2	CIP	0.0405	5	23.698	3.402	2.722	1	0.0159091	100
2	CIP	0.0405	5	23.698	3.402	2.722	1	0.0163636	100
2	CIP	0.0405	5	23.698	3.402	2.722	1	0.0168182	100
2	CIP	0.0405	5	23.698	3.402	2.722	1	0.0172727	100
2	CIP	0.0405	5	23.698	3.402	2.722	1	0.0177273	100
2	CIP	0.0405	5	23.698	3.402	2.722	1	0.0181818	100
2	CIP	0.0405	5	23.698	3.402	2.722	1	0.0186364	100
2	CIP	0.0405	5	23.698	3.402	2.722	1	0.0190909	100
2	CIP	0.0405	5	23.698	3.402	2.722	1	0.0195455	100
2	CIP	0.0405	5	23.698	3.402	2.722	1	0.02	100
2	CIP	0.0405	5	23.698	3.402	2.722	1	0.0204545	100
2	CIP	0.0405	5	23.698	3.402	2.722	1	0.0209091	100
2	CIP	0.0405	5	23.698	3.402	2.722	1	0.0213636	100
2	CIP	0.0405	5	23.698	3.402	2.722	1	0.0218182	100
2	CIP	0.0405	5	23.698	3.402	2.722	1	0.0222727	100
2	CIP	0.0405	5	23.698	3.402	2.722	1	0.0227273	100
2	CIP	0.0405	5	23.698	3.402	2.722	1	0.0231818	100
2	CIP	0.0405	5	23.698	3.402	2.722	1	0.0236364	100
2	CIP	0.0405	5	23.698	3.402	2.722	1	0.0240909	100
2	CIP	0.0405	5	23.698	3.402	2.722	1	0.0245455	99
2	CIP	0.0405	5	23.698	3.402	2.722	1	0.025	99
2	CIP	0.0405	5	23.698	3.402	2.722	1	0.0254545	99
2	CIP	0.0405	5	23.698	3.402	2.722	1	0.0259091	99
2	CIP	0.0405	5	23.698	3.402	2.722	1	0.0263636	98
2	CIP	0.0405	5	23.698	3.402	2.722	1	0.0268182	98
2	CIP	0.0405	5	23.698	3.402	2.722	1	0.0272727	97
2	CIP	0.0405	5	23.698	3.402	2.722	1	0.0277273	97
2	CIP	0.0405	5	23.698	3.402	2.722	1	0.0281818	96
2	CIP	0.0405	5	23.698	3.402	2.722	1	0.0286364	95
2	CIP	0.0405	5	23.698	3.402	2.722	1	0.0290909	94
2	CIP	0.0405	5	23.698	3.402	2.722	1	0.0295455	92
2	CIP	0.0405	5	23.698	3.402	2.722	1	0.03	91
2	CIP	0.0405	5	23.698	3.402	2.722	1	0.0304545	89
2	CIP	0.0405	5	23.698	3.402	2.722	1	0.0309091	87
2	CIP	0.0405	5	23.698	3.402	2.722	1	0.0313636	84
2	CIP	0.0405	5	23.698	3.402	2.722	1	0.0318182	82
2	CIP	0.0405	5	23.698	3.402	2.722	1	0.0322727	79
2	CIP	0.0405	5	23.698	3.402	2.722	1	0.0327273	75
2	CIP	0.0405	5	23.698	3.402	2.722	1	0.0331818	72
2	CIP	0.0405	5	23.698	3.402	2.722	1	0.0336364	69
2	CIP	0.0405	5	23.698	3.402	2.722	1	0.0340909	65
2	CIP	0.0405	5	23.698	3.402	2.722	1	0.0345455	61
2	CIP	0.0405	5	23.698	3.402	2.722	1	0.035	57
2	CIP	0.0405	5	23.698	3.402	2.722	1	0.0354545	54
2	CIP	0.0405	5	23.698	3.402	2.722	1	0.0359091	50
2	CIP	0.0405	5	23.698	3.402	2.722	1	0.0363636	47
2	CIP	0.0405	5	23.698	3.402	2.722	1	0.0368182	44
2	CIP	0.0405	5	23.698	3.402	2.722	1	0.0372727	41
2	CIP	0.0405	5	23.698	3.402	2.722	1	0.0377273	38
2	CIP	0.0405	5	23.698	3.402	2.722	1	0.0381818	35
2	CIP	0.0405	5	23.698	3.402	2.722	1	0.0386364	33
2	CIP	0.0405	5	23.698	3.402	2.722	1	0.0390909	31
2	CIP	0.0405	5	23.698	3.402	2.722	1	0.0395455	29
2	CIP	0.0405	5	23.698	3.402	2.722	1	0.04	28
2	CIP	0.0405	5	23.698	3.402	2.722	1	0.0404545	26
2	CIP	0.0405	5	23.698	3.402	2.722	1	0.0409091	25
2	CIP	0.0405	5	23.698	3.402	2.722	1	0.0413636	24
2	CIP	0.0405	5	23.698	3.402	2.722	1	0.0418182	23
2	CIP	0.0405	5	23.698	3.402	2.722	1	0.0422727	22
2	CIP	0.0405	5	23.698	3.402	2.722	1	0.0427273	21
2	CIP	0.0405	5	23.698	3.402	2.722	1	0.0431818	20
2	CIP	0.0405	5	23.698	3.402	2.722	1	0.0436364	20
2	CIP	0.0405	5	23.698	3.402	2.722	1	0.0440909	19
2	CIP	0.0405	5	23.698	3.402	2.722	1	0.0445455	19
2	CIP	0.0405	5	23.698	3.402	2.722	1	0.045	19
2	CIP	0.0415	6	23.307	3.849	3.079	0	0	100
2	CIP	0.0415	6	23.307	3.849	3.079	0	0.000454545	100
2	CIP	0.0415	6	23.307	3.849	3.079	0	0.000909091	100
2	CIP	0.0415	6	23.307	3.849	3.079	0	0.00136364	100
2	CIP	0.0415	6	23.307	3.849	3.079	0	0.00181818	100
2	CIP	0.0415	6	23.307	3.849	3.079	0	0.00227273	100
2	CIP	0.0415	6	23.307	3.849	3.079	0	0.00272727	100
2	CIP	0.0415	6	23.307	3.849	3.079	0	0.00318182	100
2	CIP	0.0415	6	23.307	3.849	3.079	0	0.00363636	100
2	CIP	0.0415	6	23.307	3.849	3.079	0	0.00409091	100
2	CIP	0.0415	6	23.307	3.849	3.079	0	0.00454545	100
2	CIP	0.0415	6	23.307	3.849	3.079	0	0.005	100
2	CIP	0.0415	6	23.307	3.849	3.079	0	0.00545455	100
2	CIP	0.0415	6	23.307	3.849	3.079	0	0.00590909	100
2	CIP	0.0415	6	23.307	3.849	3.079	0	0.00636364	100
2	CIP	0.0415	6	23.307	3.849	3.079	0	0.00681818	100
2	CIP	0.0415	6	23.307	3.849	3.079	0	0.00727273	100
2	CIP	0.0415	6	23.307	3.849	3.079	0	0.00772727	100
2	CIP	0.0415	6	23.307	3.849	3.079	0	0.00818182	100
2	CIP	0.0415	6	23.307	3.849	3.079	0	0.00863636	100
2	CIP	0.0415	6	23.307	3.849	3.079	0	0.00909091	100
2	CIP	0.0415	6	23.307	3.849	3.079	0	0.00954545	100
2	CIP	0.0415	6	23.307	3.849	3.079	0	0.01	100
2	CIP	0.0415	6	23.307	3.849	3.079	0	0.0104545	100
2	CIP	0.0415	6	23.307	3.849	3.079	0	0.0109091	100
2	CIP	0.0415	6	23.307	3.849	3.079	0	0.0113636	100
2	CIP	0.0415	6	23.307	3.849	3.079	0	0.0118182	100
2	CIP	0.0415	6	23.307	3.849	3.079	0	0.0122727	100
2	CIP	0.0415	6	23.307	3.849	3.079	0	0.0127273	100
2	CIP	0.0415	6	23.307	3.849	3.079	0	0.0131818	100
2	CIP	0.0415	6	23.307	3.849	3.079	0	0.0136364	100
2	CIP	0.0415	6	23.307	3.849	3.079	0	0.0140909	100
2	CIP	0.0415	6	23.307	3.849	3.079	0	0.0145455	100
2	CIP	0.0415	6	23.307	3.849	3.079	0	0.015	100
2	CIP	0.0415	6	23.307	3.849	3.079	0	0.0154545	100
2	CIP	0.0415	6	23.307	3.849	3.079	0	0.0159091	100
2	CIP	0.0415	6	23.307	3.849	3.079	0	0.0163636	100
2	CIP	0.0415	6	23.307	3.849	3.079	0	0.0168182	100
2	CIP	0.0415	6	23.307	3.849	3.079	0	0.0172727	100
2	CIP	0.0415	6	23.307	3.849	3.079	0	0.0177273	100
2	CIP	0.0415	6	23.307	3.849	3.079	0	0.0181818	100
2	CIP	0.0415	6	23.307	3.849	3.079	0	0.0186364	100
2	CIP	0.0415	6	23.307	3.849	3.079	0	0.0190909	100
2	CIP	0.0415	6	23.307	3.849	3.079	0	0.0195455	100
2	CIP	0.0415	6	23.307	3.849	3.079	0	0.02	100
2	CIP	0.0415	6	23.307	3.849	3.079	0	0.0204545	100
2	CIP	0.0415	6	23.307	3.849	3.079	0	0.0209091	100
2	CIP	0.0415	6	23.307	3.849	3.079	0	0.0213636	100
2	CIP	0.0415	6	23.307	3.849	3.079	0	0.0218182	100
2	CIP	0.0415	6	23.307	3.849	3.079	0	0.0222727	100
2	CIP	0.0415	6	23.307	3.849	3.079	0	0.0227273	100
2	CIP	0.0415	6	23.307	3.849	3.079	0	0.0231818	100
2	CIP	0.0415	6	23.307	3.849	3.079	0	0.0236364	100
2	CIP	0.0415	6	23.307	3.849	3.079	0	0.0240909	100
2	CIP	0.0415	6	23.307	3.849	3.079	0	0.0245455	99
2	CIP	0.0415	6	23.307	3.849	3.079	0	0.025	99
2	CIP	0.0415	6	23.307	3.849	3.079	0	0.0254545	99
2	CIP	0.0415	6	23.307	3.849	3.079	0	0.0259091	99
2	CIP	0.0415	6	23.307	3.849	3.079	0	0.0263636	98
2	CIP	0.0415	6	23.307	3.849	3.079	0	0.0268182	98
2	CIP	0.0415	6	23.307	3.849	3.079	0	0.0272727	97
2	CIP	0.0415	6	23.307	3.849	3.079	0	0.0277273	97
2	CIP	0.0415	6	23.307	3.849	3.079	0	0.0281818	96
2	CIP	0.0415	6	23.307	3.849	3.079	0	0.0286364	95
2	CIP	0.0415	6	23.307	3.849	3.079	0	0.0290909	94
2	CIP	0.0415	6	23.307	3.849	3.079	0	0.0295455	92
2	CIP	0.0415	6	23.307	3.849	3.079	0	0.03	91
2	CIP	0.0415	6	23.307	3.849	3.079	0	0.0304545	89
2	CIP	0.0415	6	23.307	3.849	3.079	0	0.0309091	87
2	CIP	0.0415	6	23.307	3.849	3.079	0	0.0313636	84
2	CIP	0.0415	6	23.307	3.849	3.079	0	0.0318182	82
2	CIP	0.0415	6	23.307	3.849	3.079	0	0.0322727	79
2	CIP	0.0415	6	23.307	3.849	3.079	0	0.0327273	75
2	CIP	0.0415	6	23.307	3.849	3.079	0	0.0331818	72
2	CIP	0.0415	6	23.307	3.849	3.079	0	0.0336364	69
2	CIP	0.0415	6	23.307	3.849	3.079	0	0.0340909	65
2	CIP	0.0415	6	23.307	3.849	3.079	0	0.0345455	61
2	CIP	0.0415	6	23.307	3.849	3.079	0	0.035	57
2	CIP	0.0415	6	23.307	3.849	3.079	0	0.0354545	54
2	CIP	0.0415	6	23.307	3.849	3.079	0	0.0359091	50
2	CIP	0.0415	6	23.307	3.849	3.079	0	0.0363636	47
2	CIP	0.0415	6	23.307	3.849	3.079	0	0.0368182	44
2	CIP	0.0415	6	23.307	3.849	3.079	0	0.0372727	41
2	CIP	0.0415	6	23.307	3.849	3.079	0	0.0377273	38
2	CIP	0.0415	6	23.307	3.849	3.079	0	0.0381818	35
2	CIP	0.0415	6	23.307	3.849	3.079	0	0.0386364	33
2	CIP	0.0415	6	23.307	3.849	3.079	0	0.0390909	31
2	CIP	0.0415	6	23.307	3.849	3.079	0	0.0395455	29
2	CIP	0.0415	6	23.307	3.849	3.079	0	0.04	28
2	CIP	0.0415	6	23.307	3.849	3.079	0	0.0404545	26
2	CIP	0.0415	6	23.307	3.849	3.079	0	0.0409091	25
2	CIP	0.0415	6	23.307	3.849	3.079	0	0.0413636	24
2	CIP	0.0415	6	23.307	3.849	3.079	0	0.0418182	23
2	CIP	0.0415	6	23.307	3.849	3.079	0	0.0422727	22
2	CIP	0.0415	6	23.307	3.849	3.079	0	0.0427273	21
2	CIP	0.0415	6	23.307	3.849	3.079	0	0.0431818	20
2	CIP	0.0415	6	23.307	3.849	3.079	0	0.0436364	20
2	CIP	0.0415	6	23.307	3.849	3.079	0	0.0440909	19
2	CIP	0.0415	6	23.307	3.849	3.079	0	0.0445455	19
2	CIP	0.0415	6	23.307	3.849	3.079	0	0.045	19
2	CIP	0.045	7	19.206	2.688	2.151	0	0	100
2	CIP	0.045	7	19.206	2.688	2.151	0	0.000454545	100
2	CIP	0.045	7	19.206	2.688	2.151	0	0.000909091	100
2	CIP	0.045	7	19.206	2.688	2.151	0	0.00136364	100
2	CIP	0.045	7	19.206	2.688	2.151	0	0.00181818	100
2	CIP	0.045	7	19.206	2.688	2.151	0	0.00227273	100
2	CIP	0.045	7	19.206	2.688	2.151	0	0.00272727	100
2	CIP	0.045	7	19.206	2.688	2.151	0	0.00318182	100
2	CIP	0.045	7	19.206	2.688	2.151	0	0.00363636	100
2	CIP	0.045	7	19.206	2.688	2.151	0	0.00409091	100
2	CIP	0.045	7	19.206	2.688	2.151	0	0.00454545	100
2	CIP	0.045	7	19.206	2.688	2.151	0	0.005	100
2	CIP	0.045	7	19.206	2.688	2.151	0	0.00545455	100
2	CIP	0.045	7	19.206	2.688	2.151	0	0.00590909	100
2	CIP	0.045	7	19.206	2.688	2.151	0	0.00636364	100
2	CIP	0.045	7	19.206	2.688	2.151	0	0.00681818	100
2	CIP	0.045	7	19.206	2.688	2.151	0	0.00727273	100
2	CIP	0.045	7	19.206	2.688	2.151	0	0.00772727	100
2	CIP	0.045	7	19.206	2.688	2.151	0	0.00818182	100
2	CIP	0.045	7	19.206	2.688	2.151	0	0.00863636	100
2	CIP	0.045	7	19.206	2.688	2.151	0	0.00909091	100
2	CIP	0.045	7	19.206	2.688	2.151	0	0.00954545	100
2	CIP	0.045	7	19.206	2.688	2.151	0	0.01	100
2	CIP	0.045	7	19.206	2.688	2.151	0	0.0104545	100
2	CIP	0.045	7	19.206	2.688	2.151	0	0.0109091	100
2	CIP	0.045	7	19.206	2.688	2.151	0	0.0113636	100
2	CIP	0.045	7	19.206	2.688	2.151	0	0.0118182	100
2	CIP	0.045	7	19.206	2.688	2.151	0	0.0122727	100
2	CIP	0.045	7	19.206	2.688	2.151	0	0.0127273	100
2	CIP	0.045	7	19.206	2.688	2.151	0	0.0131818	100
2	CIP	0.045	7	19.206	2.688	2.151	0	0.0136364	100
2	CIP	0.045	7	19.206	2.688	2.151	0	0.0140909	100
2	CIP	0.045	7	19.206	2.688	2.151	0	0.0145455	100
2	CIP	0.045	7	19.206	2.688	2.151	0	0.015	100
2	CIP	0.045	7	19.206	2.688	2.151	0	0.0154545	100
2	CIP	0.045	7	19.206	2.688	2.151	0	0.0159091	100
2	CIP	0.045	7	19.206	2.688	2.151	0	0.0163636	100
2	CIP	0.045	7	19.206	2.688	2.151	0	0.0168182	100
2	CIP	0.045	7	19.206	2.688	2.151	0	0.0172727	100
2	CIP	0.045	7	19.206	2.688	2.151	0	0.0177273	100
2	CIP	0.045	7	19.206	2.688	2.151	0	0.0181818	100
2	CIP	0.045	7	19.206	2.688	2.151	0	0.0186364	100
2	CIP	0.045	7	19.206	2.688	2.151	0	0.0190909	100
2	CIP	0.045	7	19.206	2.688	2.151	0	0.0195455	100
2	CIP	0.045	7	19.206	2.688	2.151	0	0.02	100
2	CIP	0.045	7	19.206	2.688	2.151	0	0.0204545	100
2	CIP	0.045	7	19.206	2.688	2.151	0	0.0209091	100
2	CIP	0.045	7	19.206	2.688	2.151	0	0.0213636	100
2	CIP	0.045	7	19.206	2.688	2.151	0	0.0218182	100
2	CIP	0.045	7	19.206	2.688	2.151	0	0.0222727	100
2	CIP	0.045	7	19.206	2.688	2.151	0	0.0227273	100
2	CIP	0.045	7	19.206	2.688	2.151	0	0.0231818	100
2	CIP	0.045	7	19.206	2.688	2.151	0	0.0236364	100
2	CIP	0.045	7	19.206	2.688	2.151	0	0.0240909	100
2	CIP	0.045	7	19.206	2.688	2.151	0	0.0245455	99
2	CIP	0.045	7	19.206	2.688	2.151	0	0.025	99
2	CIP	0.045	7	19.206	2.688	2.151	0	0.0254545	99
2	CIP	0.045	7	19.206	2.688	2.151	0	0.0259091	99
2	CIP	0.045	7	19.206	2.688	2.151	0	0.0263636	98
2	CIP	0.045	7	19.206	2.688	2.151	0	0.0268182	98
2	CIP	0.045	7	19.206	2.688	2.151	0	0.0272727	97
2	CIP	0.045	7	19.206	2.688	2.151	0	0.0277273	97
2	CIP	0.045	7	19.206	2.688	2.151	0	0.0281818	96
2	CIP	0.045	7	19.206	2.688	2.151	0	0.0286364	95
2	CIP	0.045	7	19.206	2.688	2.151	0	0.0290909	94
2	CIP	0.045	7	19.206	2.688	2.151	0	0.0295455	92
2	CIP	0.045	7	19.206	2.688	2.151	0	0.03	91
2	CIP	0.045	7	19.206	2.688	2.151	0	0.0304545	89
2	CIP	0.045	7	19.206	2.688	2.151	0	0.0309091	87
2	CIP	0.045	7	19.206	2.688	2.151	0	0.0313636	84
2	CIP	0.045	7	19.206	2.688	2.151	0	0.0318182	82
2	CIP	0.045	7	19.206	2.688	2.151	0	0.0322727	79
2	CIP	0.045	7	19.206	2.688	2.151	0	0.0327273	75
2	CIP	0.045	7	19.206	2.688	2.151	0	0.0331818	72
2	CIP	0.045	7	19.206	2.688	2.151	0	0.0336364	69
2	CIP	0.045	7	19.206	2.688	2.151	0	0.0340909	65
2	CIP	0.045	7	19.206	2.688	2.151	0	0.0345455	61
2	CIP	0.045	7	19.206	2.688	2.151	0	0.035	57
2	CIP	0.045	7	19.206	2.688	2.151	0	0.0354545	54
2	CIP	0.045	7	19.206	2.688	2.151	0	0.0359091	50
2	CIP	0.045	7	19.206	2.688	2.151	0	0.0363636	47
2	CIP	0.045	7	19.206	2.688	2.151	0	0.0368182	44
2	CIP	0.045	7	19.206	2.688	2.151	0	0.0372727	41
2	CIP	0.045	7	19.206	2.688	2.151	0	0.0377273	38
2	CIP	0.045	7	19.206	2.688	2.151	0	0.0381818	35
2	CIP	0.045	7	19.206	2.688	2.151	0	0.0386364	33
2	CIP	0.045	7	19.206	2.688	2.151	0	0.0390909	31
2	CIP	0.045	7	19.206	2.688	2.151	0	0.0395455	29
2	CIP	0.045	7	19.206	2.688	2.151	0	0.04	28
2	CIP	0.045	7	19.206	2.688	2.151	0	0.0404545	26
2	CIP	0.045	7	19.206	2.688	2.151	0	0.0409091	25
2	CIP	0.045	7	19.206	2.688	2.151	0	0.0413636	24
2	CIP	0.045	7	19.206	2.688	2.151	0	0.0418182	23
2	CIP	0.045	7	19.206	2.688	2.151	0	0.0422727	22
2	CIP	0.045	7	19.206	2.688	2.151	0	0.0427273	21
2	CIP	0.045	7	19.206	2.688	2.151	0	0.0431818	20
2	CIP	0.045	7	19.206	2.688	2.151	0	0.0436364	20
2	CIP	0.045	7	19.206	2.688	2.151	0	0.0440909	19
2	CIP	0.045	7	19.206	2.688	2.151	0	0.0445455	19
2	CIP	0.045	7	19.206	2.688	2.151	0	0.045	19
2	CIP	0.0385	3	36.979	8.245	6.597	0	0	100
2	CIP	0.0385	3	36.979	8.245	6.597	0	0.000454545	100
2	CIP	0.0385	3	36.979	8.245	6.597	0	0.000909091	100
2	CIP	0.0385	3	36.979	8.245	6.597	0	0.00136364	100
2	CIP	0.0385	3	36.979	8.245	6.597	0	0.00181818	100
2	CIP	0.0385	3	36.979	8.245	6.597	0	0.00227273	100
2	CIP	0.0385	3	36.979	8.245	6.597	0	0.00272727	100
2	CIP	0.0385	3	36.979	8.245	6.597	0	0.00318182	100
2	CIP	0.0385	3	36.979	8.245	6.597	0	0.00363636	100
2	CIP	0.0385	3	36.979	8.245	6.597	0	0.00409091	100
2	CIP	0.0385	3	36.979	8.245	6.597	0	0.00454545	100
2	CIP	0.0385	3	36.979	8.245	6.597	0	0.005	100
2	CIP	0.0385	3	36.979	8.245	6.597	0	0.00545455	100
2	CIP	0.0385	3	36.979	8.245	6.597	0	0.00590909	100
2	CIP	0.0385	3	36.979	8.245	6.597	0	0.00636364	100
2	CIP	0.0385	3	36.979	8.245	6.597	0	0.00681818	100
2	CIP	0.0385	3	36.979	8.245	6.597	0	0.00727273	100
2	CIP	0.0385	3	36.979	8.245	6.597	0	0.00772727	100
2	CIP	0.0385	3	36.979	8.245	6.597	0	0.00818182	100
2	CIP	0.0385	3	36.979	8.245	6.597	0	0.00863636	100
2	CIP	0.0385	3	36.979	8.245	6.597	0	0.00909091	100
2	CIP	0.0385	3	36.979	8.245	6.597	0	0.00954545	100
2	CIP	0.0385	3	36.979	8.245	6.597	0	0.01	100
2	CIP	0.0385	3	36.979	8.245	6.597	0	0.0104545	100
2	CIP	0.0385	3	36.979	8.245	6.597	0	0.0109091	100
2	CIP	0.0385	3	36.979	8.245	6.597	0	0.0113636	100
2	CIP	0.0385	3	36.979	8.245	6.597	0	0.0118182	100
2	CIP	0.0385	3	36.979	8.245	6.597	0	0.0122727	100
2	CIP	0.0385	3	36.979	8.245	6.597	0	0.0127273	100
2	CIP	0.0385	3	36.979	8.245	6.597	0	0.0131818	100
2	CIP	0.0385	3	36.979	8.245	6.597	0	0.0136364	100
2	CIP	0.0385	3	36.979	8.245	6.597	0	0.0140909	100
2	CIP	0.0385	3	36.979	8.245	6.597	0	0.0145455	100
2	CIP	0.0385	3	36.979	8.245	6.597	0	0.015	100
2	CIP	0.0385	3	36.979	8.245	6.597	0	0.0154545	100
2	CIP	0.0385	3	36.979	8.245	6.597	0	0.0159091	100
2	CIP	0.0385	3	36.979	8.245	6.597	0	0.0163636	100
2	CIP	0.0385	3	36.979	8.245	6.597	0	0.0168182	100
2	CIP	0.0385	3	36.979	8.245	6.597	0	0.0172727	100
2	CIP	0.0385	3	36.979	8.245	6.597	0	0.0177273	100
2	CIP	0.0385	3	36.979	8.245	6.597	0	0.0181818	100
2	CIP	0.0385	3	36.979	8.245	6.597	0	0.0186364	100
2	CIP	0.0385	3	36.979	8.245	6.597	0	0.0190909	100
2	CIP	0.0385	3	36.979	8.245	6.597	0	0.0195455	100
2	CIP	0.0385	3	36.979	8.245	6.597	0	0.02	100
2	CIP	0.0385	3	36.979	8.245	6.597	0	0.0204545	100
2	CIP	0.0385	3	36.979	8.245	6.597	0	0.0209091	100
2	CIP	0.0385	3	36.979	8.245	6.597	0	0.0213636	100
2	CIP	0.0385	3	36.979	8.245	6.597	0	0.0218182	100
2	CIP	0.0385	3	36.979	8.245	6.597	0	0.0222727	100
2	CIP	0.0385	3	36.979	8.245	6.597	0	0.0227273	100
2	CIP	0.0385	3	36.979	8.245	6.597	0	0.0231818	100
2	CIP	0.0385	3	36.979	8.245	6.597	0	0.0236364	100
2	CIP	0.0385	3	36.979	8.245	6.597	0	0.0240909	100
2	CIP	0.0385	3	36.979	8.245	6.597	0	0.0245455	99
2	CIP	0.0385	3	36.979	8.245	6.597	0	0.025	99
2	CIP	0.0385	3	36.979	8.245	6.597	0	0.0254545	99
2	CIP	0.0385	3	36.979	8.245	6.597	0	0.0259091	99
2	CIP	0.0385	3	36.979	8.245	6.597	0	0.0263636	98
2	CIP	0.0385	3	36.979	8.245	6.597	0	0.0268182	98
2	CIP	0.0385	3	36.979	8.245	6.597	0	0.0272727	97
2	CIP	0.0385	3	36.979	8.245	6.597	0	0.0277273	97
2	CIP	0.0385	3	36.979	8.245	6.597	0	0.0281818	96
2	CIP	0.0385	3	36.979	8.245	6.597	0	0.0286364	95
2	CIP	0.0385	3	36.979	8.245	6.597	0	0.0290909	94
2	CIP	0.0385	3	36.979	8.245	6.597	0	0.0295455	92
2	CIP	0.0385	3	36.979	8.245	6.597	0	0.03	91
2	CIP	0.0385	3	36.979	8.245	6.597	0	0.0304545	89
2	CIP	0.0385	3	36.979	8.245	6.597	0	0.0309091	87
2	CIP	0.0385	3	36.979	8.245	6.597	0	0.0313636	84
2	CIP	0.0385	3	36.979	8.245	6.597	0	0.0318182	82
2	CIP	0.0385	3	36.979	8.245	6.597	0	0.0322727	79
2	CIP	0.0385	3	36.979	8.245	6.597	0	0.0327273	75
2	CIP	0.0385	3	36.979	8.245	6.597	0	0.0331818	72
2	CIP	0.0385	3	36.979	8.245	6.597	0	0.0336364	69
2	CIP	0.0385	3	36.979	8.245	6.597	0	0.0340909	65
2	CIP	0.0385	3	36.979	8.245	6.597	0	0.0345455	61
2	CIP	0.0385	3	36.979	8.245	6.597	0	0.035	57
2	CIP	0.0385	3	36.979	8.245	6.597	0	0.0354545	54
2	CIP	0.0385	3	36.979	8.245	6.597	0	0.0359091	50
2	CIP	0.0385	3	36.979	8.245	6.597	0	0.0363636	47
2	CIP	0.0385	3	36.979	8.245	6.597	0	0.0368182	44
2	CIP	0.0385	3	36.979	8.245	6.597	0	0.0372727	41
2	CIP	0.0385	3	36.979	8.245	6.597	0	0.0377273	38
2	CIP	0.0385	3	36.979	8.245	6.597	0	0.0381818	35
2	CIP	0.0385	3	36.979	8.245	6.597	0	0.0386364	33
2	CIP	0.0385	3	36.979	8.245	6.597	0	0.0390909	31
2	CIP	0.0385	3	36.979	8.245	6.597	0	0.0395455	29
2	CIP	0.0385	3	36.979	8.245	6.597	0	0.04	28
2	CIP	0.0385	3	36.979	8.245	6.597	0	0.0404545	26
2	CIP	0.0385	3	36.979	8.245	6.597	0	0.0409091	25
2	CIP	0.0385	3	36.979	8.245	6.597	0	0.0413636	24
2	CIP	0.0385	3	36.979	8.245	6.597	0	0.0418182	23
2	CIP	0.0385	3	36.979	8.245	6.597	0	0.0422727	22
2	CIP	0.0385	3	36.979	8.245	6.597	0	0.0427273	21
2	CIP	0.0385	3	36.979	8.245	6.597	0	0.0431818	20
2	CIP	0.0385	3	36.979	8.245	6.597	0	0.0436364	20
2	CIP	0.0385	3	36.979	8.245	6.597	0	0.0440909	19
2	CIP	0.0385	3	36.979	8.245	6.597	0	0.0445455	19
2	CIP	0.0385	3	36.979	8.245	6.597	0	0.045	19
2	CIP	0.0375	2	37.565	8.549	6.841	0	0	100
2	CIP	0.0375	2	37.565	8.549	6.841	0	0.000454545	100
2	CIP	0.0375	2	37.565	8.549	6.841	0	0.000909091	100
2	CIP	0.0375	2	37.565	8.549	6.841	0	0.00136364	100
2	CIP	0.0375	2	37.565	8.549	6.841	0	0.00181818	100
2	CIP	0.0375	2	37.565	8.549	6.841	0	0.00227273	100
2	CIP	0.0375	2	37.565	8.549	6.841	0	0.00272727	100
2	CIP	0.0375	2	37.565	8.549	6.841	0	0.00318182	100
2	CIP	0.0375	2	37.565	8.549	6.841	0	0.00363636	100
2	CIP	0.0375	2	37.565	8.549	6.841	0	0.00409091	100
2	CIP	0.0375	2	37.565	8.549	6.841	0	0.00454545	100
2	CIP	0.0375	2	37.565	8.549	6.841	0	0.005	100
2	CIP	0.0375	2	37.565	8.549	6.841	0	0.00545455	100
2	CIP	0.0375	2	37.565	8.549	6.841	0	0.00590909	100
2	CIP	0.0375	2	37.565	8.549	6.841	0	0.00636364	100
2	CIP	0.0375	2	37.565	8.549	6.841	0	0.00681818	100
2	CIP	0.0375	2	37.565	8.549	6.841	0	0.00727273	100
2	CIP	0.0375	2	37.565	8.549	6.841	0	0.00772727	100
2	CIP	0.0375	2	37.565	8.549	6.841	0	0.00818182	100
2	CIP	0.0375	2	37.565	8.549	6.841	0	0.00863636	100
2	CIP	0.0375	2	37.565	8.549	6.841	0	0.00909091	100
2	CIP	0.0375	2	37.565	8.549	6.841	0	0.00954545	100
2	CIP	0.0375	2	37.565	8.549	6.841	0	0.01	100
2	CIP	0.0375	2	37.565	8.549	6.841	0	0.0104545	100
2	CIP	0.0375	2	37.565	8.549	6.841	0	0.0109091	100
2	CIP	0.0375	2	37.565	8.549	6.841	0	0.0113636	100
2	CIP	0.0375	2	37.565	8.549	6.841	0	0.0118182	100
2	CIP	0.0375	2	37.565	8.549	6.841	0	0.0122727	100
2	CIP	0.0375	2	37.565	8.549	6.841	0	0.0127273	100
2	CIP	0.0375	2	37.565	8.549	6.841	0	0.0131818	100
2	CIP	0.0375	2	37.565	8.549	6.841	0	0.0136364	100
2	CIP	0.0375	2	37.565	8.549	6.841	0	0.0140909	100
2	CIP	0.0375	2	37.565	8.549	6.841	0	0.0145455	100
2	CIP	0.0375	2	37.565	8.549	6.841	0	0.015	100
2	CIP	0.0375	2	37.565	8.549	6.841	0	0.0154545	100
2	CIP	0.0375	2	37.565	8.549	6.841	0	0.0159091	100
2	CIP	0.0375	2	37.565	8.549	6.841	0	0.0163636	100
2	CIP	0.0375	2	37.565	8.549	6.841	0	0.0168182	100
2	CIP	0.0375	2	37.565	8.549	6.841	0	0.0172727	100
2	CIP	0.0375	2	37.565	8.549	6.841	0	0.0177273	100
2	CIP	0.0375	2	37.565	8.549	6.841	0	0.0181818	100
2	CIP	0.0375	2	37.565	8.549	6.841	0	0.0186364	100
2	CIP	0.0375	2	37.565	8.549	6.841	0	0.0190909	100
2	CIP	0.0375	2	37.565	8.549	6.841	0	0.0195455	100
2	CIP	0.0375	2	37.565	8.549	6.841	0	0.02	100
2	CIP	0.0375	2	37.565	8.549	6.841	0	0.0204545	100
2	CIP	0.0375	2	37.565	8.549	6.841	0	0.0209091	100
2	CIP	0.0375	2	37.565	8.549	6.841	0	0.0213636	100
2	CIP	0.0375	2	37.565	8.549	6.841	0	0.0218182	100
2	CIP	0.0375	2	37.565	8.549	6.841	0	0.0222727	100
2	CIP	0.0375	2	37.565	8.549	6.841	0	0.0227273	100
2	CIP	0.0375	2	37.565	8.549	6.841	0	0.0231818	100
2	CIP	0.0375	2	37.565	8.549	6.841	0	0.0236364	100
2	CIP	0.0375	2	37.565	8.549	6.841	0	0.0240909	100
2	CIP	0.0375	2	37.565	8.549	6.841	0	0.0245455	99
2	CIP	0.0375	2	37.565	8.549	6.841	0	0.025	99
2	CIP	0.0375	2	37.565	8.549	6.841	0	0.0254545	99
2	CIP	0.0375	2	37.565	8.549	6.841	0	0.0259091	99
2	CIP	0.0375	2	37.565	8.549	6.841	0	0.0263636	98
2	CIP	0.0375	2	37.565	8.549	6.841	0	0.0268182	98
2	CIP	0.0375	2	37.565	8.549	6.841	0	0.0272727	97
2	CIP	0.0375	2	37.565	8.549	6.841	0	0.0277273	97
2	CIP	0.0375	2	37.565	8.549	6.841	0	0.0281818	96
2	CIP	0.0375	2	37.565	8.549	6.841	0	0.0286364	95
2	CIP	0.0375	2	37.565	8.549	6.841	0	0.0290909	94
2	CIP	0.0375	2	37.565	8.549	6.841	0	0.0295455	92
2	CIP	0.0375	2	37.565	8.549	6.841	0	0.03	91
2	CIP	0.0375	2	37.565	8.549	6.841	0	0.0304545	89
2	CIP	0.0375	2	37.565	8.549	6.841	0	0.0309091	87
2	CIP	0.0375	2	37.565	8.549	6.841	0	0.0313636	84
2	CIP	0.0375	2	37.565	8.549	6.841	0	0.0318182	82
2	CIP	0.0375	2	37.565	8.549	6.841	0	0.0322727	79
2	CIP	0.0375	2	37.565	8.549	6.841	0	0.0327273	75
2	CIP	0.0375	2	37.565	8.549	6.841	0	0.0331818	72
2	CIP	0.0375	2	37.565	8.549	6.841	0	0.0336364	69
2	CIP	0.0375	2	37.565	8.549	6.841	0	0.0340909	65
2	CIP	0.0375	2	37.565	8.549	6.841	0	0.0345455	61
2	CIP	0.0375	2	37.565	8.549	6.841	0	0.035	57
2	CIP	0.0375	2	37.565	8.549	6.841	0	0.0354545	54
2	CIP	0.0375	2	37.565	8.549	6.841	0	0.0359091	50
2	CIP	0.0375	2	37.565	8.549	6.841	0	0.0363636	47
2	CIP	0.0375	2	37.565	8.549	6.841	0	0.0368182	44
2	CIP	0.0375	2	37.565	8.549	6.841	0	0.0372727	41
2	CIP	0.0375	2	37.565	8.549	6.841	0	0.0377273	38
2	CIP	0.0375	2	37.565	8.549	6.841	0	0.0381818	35
2	CIP	0.0375	2	37.565	8.549	6.841	0	0.0386364	33
2	CIP	0.0375	2	37.565	8.549	6.841	0	0.0390909	31
2	CIP	0.0375	2	37.565	8.549	6.841	0	0.0395455	29
2	CIP	0.0375	2	37.565	8.549	6.841	0	0.04	28
2	CIP	0.0375	2	37.565	8.549	6.841	0	0.0404545	26
2	CIP	0.0375	2	37.565	8.549	6.841	0	0.0409091	25
2	CIP	0.0375	2	37.565	8.549	6.841	0	0.0413636	24
2	CIP	0.0375	2	37.565	8.549	6.841	0	0.0418182	23
2	CIP	0.0375	2	37.565	8.549	6.841	0	0.0422727	22
2	CIP	0.0375	2	37.565	8.549	6.841	0	0.0427273	21
2	CIP	0.0375	2	37.565	8.549	6.841	0	0.0431818	20
2	CIP	0.0375	2	37.565	8.549	6.841	0	0.0436364	20
2	CIP	0.0375	2	37.565	8.549	6.841	0	0.0440909	19
2	CIP	0.0375	2	37.565	8.549	6.841	0	0.0445455	19
2	CIP	0.0375	2	37.565	8.549	6.841	0	0.045	19
2	DOR	0	0	100.171	5.248	4.6	0	0	100
2	DOR	0	0	100.171	5.248	4.6	0	0.000267677	100
2	DOR	0	0	100.171	5.248	4.6	0	0.000535354	100
2	DOR	0	0	100.171	5.248	4.6	0	0.00080303	100
2	DOR	0	0	100.171	5.248	4.6	0	0.00107071	100
2	DOR	0	0	100.171	5.248	4.6	0	0.00133838	100
2	DOR	0	0	100.171	5.248	4.6	0	0.00160606	100
2	DOR	0	0	100.171	5.248	4.6	0	0.00187374	100
2	DOR	0	0	100.171	5.248	4.6	0	0.00214141	100
2	DOR	0	0	100.171	5.248	4.6	0	0.00240909	100
2	DOR	0	0	100.171	5.248	4.6	0	0.00267677	100
2	DOR	0	0	100.171	5.248	4.6	0	0.00294444	100
2	DOR	0	0	100.171	5.248	4.6	0	0.00321212	100
2	DOR	0	0	100.171	5.248	4.6	0	0.0034798	100
2	DOR	0	0	100.171	5.248	4.6	0	0.00374747	100
2	DOR	0	0	100.171	5.248	4.6	0	0.00401515	100
2	DOR	0	0	100.171	5.248	4.6	0	0.00428283	100
2	DOR	0	0	100.171	5.248	4.6	0	0.00455051	100
2	DOR	0	0	100.171	5.248	4.6	0	0.00481818	100
2	DOR	0	0	100.171	5.248	4.6	0	0.00508586	100
2	DOR	0	0	100.171	5.248	4.6	0	0.00535354	100
2	DOR	0	0	100.171	5.248	4.6	0	0.00562121	100
2	DOR	0	0	100.171	5.248	4.6	0	0.00588889	100
2	DOR	0	0	100.171	5.248	4.6	0	0.00615657	100
2	DOR	0	0	100.171	5.248	4.6	0	0.00642424	100
2	DOR	0	0	100.171	5.248	4.6	0	0.00669192	100
2	DOR	0	0	100.171	5.248	4.6	0	0.0069596	100
2	DOR	0	0	100.171	5.248	4.6	0	0.00722727	100
2	DOR	0	0	100.171	5.248	4.6	0	0.00749495	100
2	DOR	0	0	100.171	5.248	4.6	0	0.00776263	100
2	DOR	0	0	100.171	5.248	4.6	0	0.0080303	100
2	DOR	0	0	100.171	5.248	4.6	0	0.00829798	100
2	DOR	0	0	100.171	5.248	4.6	0	0.00856566	100
2	DOR	0	0	100.171	5.248	4.6	0	0.00883333	100
2	DOR	0	0	100.171	5.248	4.6	0	0.00910101	100
2	DOR	0	0	100.171	5.248	4.6	0	0.00936869	100
2	DOR	0	0	100.171	5.248	4.6	0	0.00963636	99
2	DOR	0	0	100.171	5.248	4.6	0	0.00990404	99
2	DOR	0	0	100.171	5.248	4.6	0	0.0101717	99
2	DOR	0	0	100.171	5.248	4.6	0	0.0104394	99
2	DOR	0	0	100.171	5.248	4.6	0	0.0107071	99
2	DOR	0	0	100.171	5.248	4.6	0	0.0109747	99
2	DOR	0	0	100.171	5.248	4.6	0	0.0112424	98
2	DOR	0	0	100.171	5.248	4.6	0	0.0115101	98
2	DOR	0	0	100.171	5.248	4.6	0	0.0117778	98
2	DOR	0	0	100.171	5.248	4.6	0	0.0120455	97
2	DOR	0	0	100.171	5.248	4.6	0	0.0123131	97
2	DOR	0	0	100.171	5.248	4.6	0	0.0125808	96
2	DOR	0	0	100.171	5.248	4.6	0	0.0128485	96
2	DOR	0	0	100.171	5.248	4.6	0	0.0131162	95
2	DOR	0	0	100.171	5.248	4.6	0	0.0133838	95
2	DOR	0	0	100.171	5.248	4.6	0	0.0136515	94
2	DOR	0	0	100.171	5.248	4.6	0	0.0139192	93
2	DOR	0	0	100.171	5.248	4.6	0	0.0141869	93
2	DOR	0	0	100.171	5.248	4.6	0	0.0144545	92
2	DOR	0	0	100.171	5.248	4.6	0	0.0147222	91
2	DOR	0	0	100.171	5.248	4.6	0	0.0149899	90
2	DOR	0	0	100.171	5.248	4.6	0	0.0152576	89
2	DOR	0	0	100.171	5.248	4.6	0	0.0155253	87
2	DOR	0	0	100.171	5.248	4.6	0	0.0157929	86
2	DOR	0	0	100.171	5.248	4.6	0	0.0160606	85
2	DOR	0	0	100.171	5.248	4.6	0	0.0163283	84
2	DOR	0	0	100.171	5.248	4.6	0	0.016596	82
2	DOR	0	0	100.171	5.248	4.6	0	0.0168636	81
2	DOR	0	0	100.171	5.248	4.6	0	0.0171313	79
2	DOR	0	0	100.171	5.248	4.6	0	0.017399	77
2	DOR	0	0	100.171	5.248	4.6	0	0.0176667	76
2	DOR	0	0	100.171	5.248	4.6	0	0.0179343	74
2	DOR	0	0	100.171	5.248	4.6	0	0.018202	72
2	DOR	0	0	100.171	5.248	4.6	0	0.0184697	70
2	DOR	0	0	100.171	5.248	4.6	0	0.0187374	69
2	DOR	0	0	100.171	5.248	4.6	0	0.0190051	67
2	DOR	0	0	100.171	5.248	4.6	0	0.0192727	65
2	DOR	0	0	100.171	5.248	4.6	0	0.0195404	63
2	DOR	0	0	100.171	5.248	4.6	0	0.0198081	61
2	DOR	0	0	100.171	5.248	4.6	0	0.0200758	59
2	DOR	0	0	100.171	5.248	4.6	0	0.0203434	57
2	DOR	0	0	100.171	5.248	4.6	0	0.0206111	55
2	DOR	0	0	100.171	5.248	4.6	0	0.0208788	53
2	DOR	0	0	100.171	5.248	4.6	0	0.0211465	52
2	DOR	0	0	100.171	5.248	4.6	0	0.0214141	50
2	DOR	0	0	100.171	5.248	4.6	0	0.0216818	48
2	DOR	0	0	100.171	5.248	4.6	0	0.0219495	46
2	DOR	0	0	100.171	5.248	4.6	0	0.0222172	45
2	DOR	0	0	100.171	5.248	4.6	0	0.0224848	43
2	DOR	0	0	100.171	5.248	4.6	0	0.0227525	41
2	DOR	0	0	100.171	5.248	4.6	0	0.0230202	40
2	DOR	0	0	100.171	5.248	4.6	0	0.0232879	38
2	DOR	0	0	100.171	5.248	4.6	0	0.0235556	37
2	DOR	0	0	100.171	5.248	4.6	0	0.0238232	36
2	DOR	0	0	100.171	5.248	4.6	0	0.0240909	34
2	DOR	0	0	100.171	5.248	4.6	0	0.0243586	33
2	DOR	0	0	100.171	5.248	4.6	0	0.0246263	32
2	DOR	0	0	100.171	5.248	4.6	0	0.0248939	31
2	DOR	0	0	100.171	5.248	4.6	0	0.0251616	30
2	DOR	0	0	100.171	5.248	4.6	0	0.0254293	28
2	DOR	0	0	100.171	5.248	4.6	0	0.025697	27
2	DOR	0	0	100.171	5.248	4.6	0	0.0259646	26
2	DOR	0	0	100.171	5.248	4.6	0	0.0262323	26
2	DOR	0	0	100.171	5.248	4.6	0	0.0265	25
2	DOR	0.0215	2	46.011	5.424	4.34	0	0	100
2	DOR	0.0215	2	46.011	5.424	4.34	0	0.000267677	100
2	DOR	0.0215	2	46.011	5.424	4.34	0	0.000535354	100
2	DOR	0.0215	2	46.011	5.424	4.34	0	0.00080303	100
2	DOR	0.0215	2	46.011	5.424	4.34	0	0.00107071	100
2	DOR	0.0215	2	46.011	5.424	4.34	0	0.00133838	100
2	DOR	0.0215	2	46.011	5.424	4.34	0	0.00160606	100
2	DOR	0.0215	2	46.011	5.424	4.34	0	0.00187374	100
2	DOR	0.0215	2	46.011	5.424	4.34	0	0.00214141	100
2	DOR	0.0215	2	46.011	5.424	4.34	0	0.00240909	100
2	DOR	0.0215	2	46.011	5.424	4.34	0	0.00267677	100
2	DOR	0.0215	2	46.011	5.424	4.34	0	0.00294444	100
2	DOR	0.0215	2	46.011	5.424	4.34	0	0.00321212	100
2	DOR	0.0215	2	46.011	5.424	4.34	0	0.0034798	100
2	DOR	0.0215	2	46.011	5.424	4.34	0	0.00374747	100
2	DOR	0.0215	2	46.011	5.424	4.34	0	0.00401515	100
2	DOR	0.0215	2	46.011	5.424	4.34	0	0.00428283	100
2	DOR	0.0215	2	46.011	5.424	4.34	0	0.00455051	100
2	DOR	0.0215	2	46.011	5.424	4.34	0	0.00481818	100
2	DOR	0.0215	2	46.011	5.424	4.34	0	0.00508586	100
2	DOR	0.0215	2	46.011	5.424	4.34	0	0.00535354	100
2	DOR	0.0215	2	46.011	5.424	4.34	0	0.00562121	100
2	DOR	0.0215	2	46.011	5.424	4.34	0	0.00588889	100
2	DOR	0.0215	2	46.011	5.424	4.34	0	0.00615657	100
2	DOR	0.0215	2	46.011	5.424	4.34	0	0.00642424	100
2	DOR	0.0215	2	46.011	5.424	4.34	0	0.00669192	100
2	DOR	0.0215	2	46.011	5.424	4.34	0	0.0069596	100
2	DOR	0.0215	2	46.011	5.424	4.34	0	0.00722727	100
2	DOR	0.0215	2	46.011	5.424	4.34	0	0.00749495	100
2	DOR	0.0215	2	46.011	5.424	4.34	0	0.00776263	100
2	DOR	0.0215	2	46.011	5.424	4.34	0	0.0080303	100
2	DOR	0.0215	2	46.011	5.424	4.34	0	0.00829798	100
2	DOR	0.0215	2	46.011	5.424	4.34	0	0.00856566	100
2	DOR	0.0215	2	46.011	5.424	4.34	0	0.00883333	100
2	DOR	0.0215	2	46.011	5.424	4.34	0	0.00910101	100
2	DOR	0.0215	2	46.011	5.424	4.34	0	0.00936869	100
2	DOR	0.0215	2	46.011	5.424	4.34	0	0.00963636	99
2	DOR	0.0215	2	46.011	5.424	4.34	0	0.00990404	99
2	DOR	0.0215	2	46.011	5.424	4.34	0	0.0101717	99
2	DOR	0.0215	2	46.011	5.424	4.34	0	0.0104394	99
2	DOR	0.0215	2	46.011	5.424	4.34	0	0.0107071	99
2	DOR	0.0215	2	46.011	5.424	4.34	0	0.0109747	99
2	DOR	0.0215	2	46.011	5.424	4.34	0	0.0112424	98
2	DOR	0.0215	2	46.011	5.424	4.34	0	0.0115101	98
2	DOR	0.0215	2	46.011	5.424	4.34	0	0.0117778	98
2	DOR	0.0215	2	46.011	5.424	4.34	0	0.0120455	97
2	DOR	0.0215	2	46.011	5.424	4.34	0	0.0123131	97
2	DOR	0.0215	2	46.011	5.424	4.34	0	0.0125808	96
2	DOR	0.0215	2	46.011	5.424	4.34	0	0.0128485	96
2	DOR	0.0215	2	46.011	5.424	4.34	0	0.0131162	95
2	DOR	0.0215	2	46.011	5.424	4.34	0	0.0133838	95
2	DOR	0.0215	2	46.011	5.424	4.34	0	0.0136515	94
2	DOR	0.0215	2	46.011	5.424	4.34	0	0.0139192	93
2	DOR	0.0215	2	46.011	5.424	4.34	0	0.0141869	93
2	DOR	0.0215	2	46.011	5.424	4.34	0	0.0144545	92
2	DOR	0.0215	2	46.011	5.424	4.34	0	0.0147222	91
2	DOR	0.0215	2	46.011	5.424	4.34	0	0.0149899	90
2	DOR	0.0215	2	46.011	5.424	4.34	0	0.0152576	89
2	DOR	0.0215	2	46.011	5.424	4.34	0	0.0155253	87
2	DOR	0.0215	2	46.011	5.424	4.34	0	0.0157929	86
2	DOR	0.0215	2	46.011	5.424	4.34	0	0.0160606	85
2	DOR	0.0215	2	46.011	5.424	4.34	0	0.0163283	84
2	DOR	0.0215	2	46.011	5.424	4.34	0	0.016596	82
2	DOR	0.0215	2	46.011	5.424	4.34	0	0.0168636	81
2	DOR	0.0215	2	46.011	5.424	4.34	0	0.0171313	79
2	DOR	0.0215	2	46.011	5.424	4.34	0	0.017399	77
2	DOR	0.0215	2	46.011	5.424	4.34	0	0.0176667	76
2	DOR	0.0215	2	46.011	5.424	4.34	0	0.0179343	74
2	DOR	0.0215	2	46.011	5.424	4.34	0	0.018202	72
2	DOR	0.0215	2	46.011	5.424	4.34	0	0.0184697	70
2	DOR	0.0215	2	46.011	5.424	4.34	0	0.0187374	69
2	DOR	0.0215	2	46.011	5.424	4.34	0	0.0190051	67
2	DOR	0.0215	2	46.011	5.424	4.34	0	0.0192727	65
2	DOR	0.0215	2	46.011	5.424	4.34	0	0.0195404	63
2	DOR	0.0215	2	46.011	5.424	4.34	0	0.0198081	61
2	DOR	0.0215	2	46.011	5.424	4.34	0	0.0200758	59
2	DOR	0.0215	2	46.011	5.424	4.34	0	0.0203434	57
2	DOR	0.0215	2	46.011	5.424	4.34	0	0.0206111	55
2	DOR	0.0215	2	46.011	5.424	4.34	0	0.0208788	53
2	DOR	0.0215	2	46.011	5.424	4.34	0	0.0211465	52
2	DOR	0.0215	2	46.011	5.424	4.34	0	0.0214141	50
2	DOR	0.0215	2	46.011	5.424	4.34	0	0.0216818	48
2	DOR	0.0215	2	46.011	5.424	4.34	0	0.0219495	46
2	DOR	0.0215	2	46.011	5.424	4.34	0	0.0222172	45
2	DOR	0.0215	2	46.011	5.424	4.34	0	0.0224848	43
2	DOR	0.0215	2	46.011	5.424	4.34	0	0.0227525	41
2	DOR	0.0215	2	46.011	5.424	4.34	0	0.0230202	40
2	DOR	0.0215	2	46.011	5.424	4.34	0	0.0232879	38
2	DOR	0.0215	2	46.011	5.424	4.34	0	0.0235556	37
2	DOR	0.0215	2	46.011	5.424	4.34	0	0.0238232	36
2	DOR	0.0215	2	46.011	5.424	4.34	0	0.0240909	34
2	DOR	0.0215	2	46.011	5.424	4.34	0	0.0243586	33
2	DOR	0.0215	2	46.011	5.424	4.34	0	0.0246263	32
2	DOR	0.0215	2	46.011	5.424	4.34	0	0.0248939	31
2	DOR	0.0215	2	46.011	5.424	4.34	0	0.0251616	30
2	DOR	0.0215	2	46.011	5.424	4.34	0	0.0254293	28
2	DOR	0.0215	2	46.011	5.424	4.34	0	0.025697	27
2	DOR	0.0215	2	46.011	5.424	4.34	0	0.0259646	26
2	DOR	0.0215	2	46.011	5.424	4.34	0	0.0262323	26
2	DOR	0.0215	2	46.011	5.424	4.34	0	0.0265	25
2	DOR	0.0225	3	42.877	6.36	5.089	0	0	100
2	DOR	0.0225	3	42.877	6.36	5.089	0	0.000267677	100
2	DOR	0.0225	3	42.877	6.36	5.089	0	0.000535354	100
2	DOR	0.0225	3	42.877	6.36	5.089	0	0.00080303	100
2	DOR	0.0225	3	42.877	6.36	5.089	0	0.00107071	100
2	DOR	0.0225	3	42.877	6.36	5.089	0	0.00133838	100
2	DOR	0.0225	3	42.877	6.36	5.089	0	0.00160606	100
2	DOR	0.0225	3	42.877	6.36	5.089	0	0.00187374	100
2	DOR	0.0225	3	42.877	6.36	5.089	0	0.00214141	100
2	DOR	0.0225	3	42.877	6.36	5.089	0	0.00240909	100
2	DOR	0.0225	3	42.877	6.36	5.089	0	0.00267677	100
2	DOR	0.0225	3	42.877	6.36	5.089	0	0.00294444	100
2	DOR	0.0225	3	42.877	6.36	5.089	0	0.00321212	100
2	DOR	0.0225	3	42.877	6.36	5.089	0	0.0034798	100
2	DOR	0.0225	3	42.877	6.36	5.089	0	0.00374747	100
2	DOR	0.0225	3	42.877	6.36	5.089	0	0.00401515	100
2	DOR	0.0225	3	42.877	6.36	5.089	0	0.00428283	100
2	DOR	0.0225	3	42.877	6.36	5.089	0	0.00455051	100
2	DOR	0.0225	3	42.877	6.36	5.089	0	0.00481818	100
2	DOR	0.0225	3	42.877	6.36	5.089	0	0.00508586	100
2	DOR	0.0225	3	42.877	6.36	5.089	0	0.00535354	100
2	DOR	0.0225	3	42.877	6.36	5.089	0	0.00562121	100
2	DOR	0.0225	3	42.877	6.36	5.089	0	0.00588889	100
2	DOR	0.0225	3	42.877	6.36	5.089	0	0.00615657	100
2	DOR	0.0225	3	42.877	6.36	5.089	0	0.00642424	100
2	DOR	0.0225	3	42.877	6.36	5.089	0	0.00669192	100
2	DOR	0.0225	3	42.877	6.36	5.089	0	0.0069596	100
2	DOR	0.0225	3	42.877	6.36	5.089	0	0.00722727	100
2	DOR	0.0225	3	42.877	6.36	5.089	0	0.00749495	100
2	DOR	0.0225	3	42.877	6.36	5.089	0	0.00776263	100
2	DOR	0.0225	3	42.877	6.36	5.089	0	0.0080303	100
2	DOR	0.0225	3	42.877	6.36	5.089	0	0.00829798	100
2	DOR	0.0225	3	42.877	6.36	5.089	0	0.00856566	100
2	DOR	0.0225	3	42.877	6.36	5.089	0	0.00883333	100
2	DOR	0.0225	3	42.877	6.36	5.089	0	0.00910101	100
2	DOR	0.0225	3	42.877	6.36	5.089	0	0.00936869	100
2	DOR	0.0225	3	42.877	6.36	5.089	0	0.00963636	99
2	DOR	0.0225	3	42.877	6.36	5.089	0	0.00990404	99
2	DOR	0.0225	3	42.877	6.36	5.089	0	0.0101717	99
2	DOR	0.0225	3	42.877	6.36	5.089	0	0.0104394	99
2	DOR	0.0225	3	42.877	6.36	5.089	0	0.0107071	99
2	DOR	0.0225	3	42.877	6.36	5.089	0	0.0109747	99
2	DOR	0.0225	3	42.877	6.36	5.089	0	0.0112424	98
2	DOR	0.0225	3	42.877	6.36	5.089	0	0.0115101	98
2	DOR	0.0225	3	42.877	6.36	5.089	0	0.0117778	98
2	DOR	0.0225	3	42.877	6.36	5.089	0	0.0120455	97
2	DOR	0.0225	3	42.877	6.36	5.089	0	0.0123131	97
2	DOR	0.0225	3	42.877	6.36	5.089	0	0.0125808	96
2	DOR	0.0225	3	42.877	6.36	5.089	0	0.0128485	96
2	DOR	0.0225	3	42.877	6.36	5.089	0	0.0131162	95
2	DOR	0.0225	3	42.877	6.36	5.089	0	0.0133838	95
2	DOR	0.0225	3	42.877	6.36	5.089	0	0.0136515	94
2	DOR	0.0225	3	42.877	6.36	5.089	0	0.0139192	93
2	DOR	0.0225	3	42.877	6.36	5.089	0	0.0141869	93
2	DOR	0.0225	3	42.877	6.36	5.089	0	0.0144545	92
2	DOR	0.0225	3	42.877	6.36	5.089	0	0.0147222	91
2	DOR	0.0225	3	42.877	6.36	5.089	0	0.0149899	90
2	DOR	0.0225	3	42.877	6.36	5.089	0	0.0152576	89
2	DOR	0.0225	3	42.877	6.36	5.089	0	0.0155253	87
2	DOR	0.0225	3	42.877	6.36	5.089	0	0.0157929	86
2	DOR	0.0225	3	42.877	6.36	5.089	0	0.0160606	85
2	DOR	0.0225	3	42.877	6.36	5.089	0	0.0163283	84
2	DOR	0.0225	3	42.877	6.36	5.089	0	0.016596	82
2	DOR	0.0225	3	42.877	6.36	5.089	0	0.0168636	81
2	DOR	0.0225	3	42.877	6.36	5.089	0	0.0171313	79
2	DOR	0.0225	3	42.877	6.36	5.089	0	0.017399	77
2	DOR	0.0225	3	42.877	6.36	5.089	0	0.0176667	76
2	DOR	0.0225	3	42.877	6.36	5.089	0	0.0179343	74
2	DOR	0.0225	3	42.877	6.36	5.089	0	0.018202	72
2	DOR	0.0225	3	42.877	6.36	5.089	0	0.0184697	70
2	DOR	0.0225	3	42.877	6.36	5.089	0	0.0187374	69
2	DOR	0.0225	3	42.877	6.36	5.089	0	0.0190051	67
2	DOR	0.0225	3	42.877	6.36	5.089	0	0.0192727	65
2	DOR	0.0225	3	42.877	6.36	5.089	0	0.0195404	63
2	DOR	0.0225	3	42.877	6.36	5.089	0	0.0198081	61
2	DOR	0.0225	3	42.877	6.36	5.089	0	0.0200758	59
2	DOR	0.0225	3	42.877	6.36	5.089	0	0.0203434	57
2	DOR	0.0225	3	42.877	6.36	5.089	0	0.0206111	55
2	DOR	0.0225	3	42.877	6.36	5.089	0	0.0208788	53
2	DOR	0.0225	3	42.877	6.36	5.089	0	0.0211465	52
2	DOR	0.0225	3	42.877	6.36	5.089	0	0.0214141	50
2	DOR	0.0225	3	42.877	6.36	5.089	0	0.0216818	48
2	DOR	0.0225	3	42.877	6.36	5.089	0	0.0219495	46
2	DOR	0.0225	3	42.877	6.36	5.089	0	0.0222172	45
2	DOR	0.0225	3	42.877	6.36	5.089	0	0.0224848	43
2	DOR	0.0225	3	42.877	6.36	5.089	0	0.0227525	41
2	DOR	0.0225	3	42.877	6.36	5.089	0	0.0230202	40
2	DOR	0.0225	3	42.877	6.36	5.089	0	0.0232879	38
2	DOR	0.0225	3	42.877	6.36	5.089	0	0.0235556	37
2	DOR	0.0225	3	42.877	6.36	5.089	0	0.0238232	36
2	DOR	0.0225	3	42.877	6.36	5.089	0	0.0240909	34
2	DOR	0.0225	3	42.877	6.36	5.089	0	0.0243586	33
2	DOR	0.0225	3	42.877	6.36	5.089	0	0.0246263	32
2	DOR	0.0225	3	42.877	6.36	5.089	0	0.0248939	31
2	DOR	0.0225	3	42.877	6.36	5.089	0	0.0251616	30
2	DOR	0.0225	3	42.877	6.36	5.089	0	0.0254293	28
2	DOR	0.0225	3	42.877	6.36	5.089	0	0.025697	27
2	DOR	0.0225	3	42.877	6.36	5.089	0	0.0259646	26
2	DOR	0.0225	3	42.877	6.36	5.089	0	0.0262323	26
2	DOR	0.0225	3	42.877	6.36	5.089	0	0.0265	25
2	DOR	0.0235	4	39.601	5.147	4.119	0	0	100
2	DOR	0.0235	4	39.601	5.147	4.119	0	0.000267677	100
2	DOR	0.0235	4	39.601	5.147	4.119	0	0.000535354	100
2	DOR	0.0235	4	39.601	5.147	4.119	0	0.00080303	100
2	DOR	0.0235	4	39.601	5.147	4.119	0	0.00107071	100
2	DOR	0.0235	4	39.601	5.147	4.119	0	0.00133838	100
2	DOR	0.0235	4	39.601	5.147	4.119	0	0.00160606	100
2	DOR	0.0235	4	39.601	5.147	4.119	0	0.00187374	100
2	DOR	0.0235	4	39.601	5.147	4.119	0	0.00214141	100
2	DOR	0.0235	4	39.601	5.147	4.119	0	0.00240909	100
2	DOR	0.0235	4	39.601	5.147	4.119	0	0.00267677	100
2	DOR	0.0235	4	39.601	5.147	4.119	0	0.00294444	100
2	DOR	0.0235	4	39.601	5.147	4.119	0	0.00321212	100
2	DOR	0.0235	4	39.601	5.147	4.119	0	0.0034798	100
2	DOR	0.0235	4	39.601	5.147	4.119	0	0.00374747	100
2	DOR	0.0235	4	39.601	5.147	4.119	0	0.00401515	100
2	DOR	0.0235	4	39.601	5.147	4.119	0	0.00428283	100
2	DOR	0.0235	4	39.601	5.147	4.119	0	0.00455051	100
2	DOR	0.0235	4	39.601	5.147	4.119	0	0.00481818	100
2	DOR	0.0235	4	39.601	5.147	4.119	0	0.00508586	100
2	DOR	0.0235	4	39.601	5.147	4.119	0	0.00535354	100
2	DOR	0.0235	4	39.601	5.147	4.119	0	0.00562121	100
2	DOR	0.0235	4	39.601	5.147	4.119	0	0.00588889	100
2	DOR	0.0235	4	39.601	5.147	4.119	0	0.00615657	100
2	DOR	0.0235	4	39.601	5.147	4.119	0	0.00642424	100
2	DOR	0.0235	4	39.601	5.147	4.119	0	0.00669192	100
2	DOR	0.0235	4	39.601	5.147	4.119	0	0.0069596	100
2	DOR	0.0235	4	39.601	5.147	4.119	0	0.00722727	100
2	DOR	0.0235	4	39.601	5.147	4.119	0	0.00749495	100
2	DOR	0.0235	4	39.601	5.147	4.119	0	0.00776263	100
2	DOR	0.0235	4	39.601	5.147	4.119	0	0.0080303	100
2	DOR	0.0235	4	39.601	5.147	4.119	0	0.00829798	100
2	DOR	0.0235	4	39.601	5.147	4.119	0	0.00856566	100
2	DOR	0.0235	4	39.601	5.147	4.119	0	0.00883333	100
2	DOR	0.0235	4	39.601	5.147	4.119	0	0.00910101	100
2	DOR	0.0235	4	39.601	5.147	4.119	0	0.00936869	100
2	DOR	0.0235	4	39.601	5.147	4.119	0	0.00963636	99
2	DOR	0.0235	4	39.601	5.147	4.119	0	0.00990404	99
2	DOR	0.0235	4	39.601	5.147	4.119	0	0.0101717	99
2	DOR	0.0235	4	39.601	5.147	4.119	0	0.0104394	99
2	DOR	0.0235	4	39.601	5.147	4.119	0	0.0107071	99
2	DOR	0.0235	4	39.601	5.147	4.119	0	0.0109747	99
2	DOR	0.0235	4	39.601	5.147	4.119	0	0.0112424	98
2	DOR	0.0235	4	39.601	5.147	4.119	0	0.0115101	98
2	DOR	0.0235	4	39.601	5.147	4.119	0	0.0117778	98
2	DOR	0.0235	4	39.601	5.147	4.119	0	0.0120455	97
2	DOR	0.0235	4	39.601	5.147	4.119	0	0.0123131	97
2	DOR	0.0235	4	39.601	5.147	4.119	0	0.0125808	96
2	DOR	0.0235	4	39.601	5.147	4.119	0	0.0128485	96
2	DOR	0.0235	4	39.601	5.147	4.119	0	0.0131162	95
2	DOR	0.0235	4	39.601	5.147	4.119	0	0.0133838	95
2	DOR	0.0235	4	39.601	5.147	4.119	0	0.0136515	94
2	DOR	0.0235	4	39.601	5.147	4.119	0	0.0139192	93
2	DOR	0.0235	4	39.601	5.147	4.119	0	0.0141869	93
2	DOR	0.0235	4	39.601	5.147	4.119	0	0.0144545	92
2	DOR	0.0235	4	39.601	5.147	4.119	0	0.0147222	91
2	DOR	0.0235	4	39.601	5.147	4.119	0	0.0149899	90
2	DOR	0.0235	4	39.601	5.147	4.119	0	0.0152576	89
2	DOR	0.0235	4	39.601	5.147	4.119	0	0.0155253	87
2	DOR	0.0235	4	39.601	5.147	4.119	0	0.0157929	86
2	DOR	0.0235	4	39.601	5.147	4.119	0	0.0160606	85
2	DOR	0.0235	4	39.601	5.147	4.119	0	0.0163283	84
2	DOR	0.0235	4	39.601	5.147	4.119	0	0.016596	82
2	DOR	0.0235	4	39.601	5.147	4.119	0	0.0168636	81
2	DOR	0.0235	4	39.601	5.147	4.119	0	0.0171313	79
2	DOR	0.0235	4	39.601	5.147	4.119	0	0.017399	77
2	DOR	0.0235	4	39.601	5.147	4.119	0	0.0176667	76
2	DOR	0.0235	4	39.601	5.147	4.119	0	0.0179343	74
2	DOR	0.0235	4	39.601	5.147	4.119	0	0.018202	72
2	DOR	0.0235	4	39.601	5.147	4.119	0	0.0184697	70
2	DOR	0.0235	4	39.601	5.147	4.119	0	0.0187374	69
2	DOR	0.0235	4	39.601	5.147	4.119	0	0.0190051	67
2	DOR	0.0235	4	39.601	5.147	4.119	0	0.0192727	65
2	DOR	0.0235	4	39.601	5.147	4.119	0	0.0195404	63
2	DOR	0.0235	4	39.601	5.147	4.119	0	0.0198081	61
2	DOR	0.0235	4	39.601	5.147	4.119	0	0.0200758	59
2	DOR	0.0235	4	39.601	5.147	4.119	0	0.0203434	57
2	DOR	0.0235	4	39.601	5.147	4.119	0	0.0206111	55
2	DOR	0.0235	4	39.601	5.147	4.119	0	0.0208788	53
2	DOR	0.0235	4	39.601	5.147	4.119	0	0.0211465	52
2	DOR	0.0235	4	39.601	5.147	4.119	0	0.0214141	50
2	DOR	0.0235	4	39.601	5.147	4.119	0	0.0216818	48
2	DOR	0.0235	4	39.601	5.147	4.119	0	0.0219495	46
2	DOR	0.0235	4	39.601	5.147	4.119	0	0.0222172	45
2	DOR	0.0235	4	39.601	5.147	4.119	0	0.0224848	43
2	DOR	0.0235	4	39.601	5.147	4.119	0	0.0227525	41
2	DOR	0.0235	4	39.601	5.147	4.119	0	0.0230202	40
2	DOR	0.0235	4	39.601	5.147	4.119	0	0.0232879	38
2	DOR	0.0235	4	39.601	5.147	4.119	0	0.0235556	37
2	DOR	0.0235	4	39.601	5.147	4.119	0	0.0238232	36
2	DOR	0.0235	4	39.601	5.147	4.119	0	0.0240909	34
2	DOR	0.0235	4	39.601	5.147	4.119	0	0.0243586	33
2	DOR	0.0235	4	39.601	5.147	4.119	0	0.0246263	32
2	DOR	0.0235	4	39.601	5.147	4.119	0	0.0248939	31
2	DOR	0.0235	4	39.601	5.147	4.119	0	0.0251616	30
2	DOR	0.0235	4	39.601	5.147	4.119	0	0.0254293	28
2	DOR	0.0235	4	39.601	5.147	4.119	0	0.025697	27
2	DOR	0.0235	4	39.601	5.147	4.119	0	0.0259646	26
2	DOR	0.0235	4	39.601	5.147	4.119	0	0.0262323	26
2	DOR	0.0235	4	39.601	5.147	4.119	0	0.0265	25
2	DOR	0.0205	1	57.906	16.872	13.5	0	0	100
2	DOR	0.0205	1	57.906	16.872	13.5	0	0.000267677	100
2	DOR	0.0205	1	57.906	16.872	13.5	0	0.000535354	100
2	DOR	0.0205	1	57.906	16.872	13.5	0	0.00080303	100
2	DOR	0.0205	1	57.906	16.872	13.5	0	0.00107071	100
2	DOR	0.0205	1	57.906	16.872	13.5	0	0.00133838	100
2	DOR	0.0205	1	57.906	16.872	13.5	0	0.00160606	100
2	DOR	0.0205	1	57.906	16.872	13.5	0	0.00187374	100
2	DOR	0.0205	1	57.906	16.872	13.5	0	0.00214141	100
2	DOR	0.0205	1	57.906	16.872	13.5	0	0.00240909	100
2	DOR	0.0205	1	57.906	16.872	13.5	0	0.00267677	100
2	DOR	0.0205	1	57.906	16.872	13.5	0	0.00294444	100
2	DOR	0.0205	1	57.906	16.872	13.5	0	0.00321212	100
2	DOR	0.0205	1	57.906	16.872	13.5	0	0.0034798	100
2	DOR	0.0205	1	57.906	16.872	13.5	0	0.00374747	100
2	DOR	0.0205	1	57.906	16.872	13.5	0	0.00401515	100
2	DOR	0.0205	1	57.906	16.872	13.5	0	0.00428283	100
2	DOR	0.0205	1	57.906	16.872	13.5	0	0.00455051	100
2	DOR	0.0205	1	57.906	16.872	13.5	0	0.00481818	100
2	DOR	0.0205	1	57.906	16.872	13.5	0	0.00508586	100
2	DOR	0.0205	1	57.906	16.872	13.5	0	0.00535354	100
2	DOR	0.0205	1	57.906	16.872	13.5	0	0.00562121	100
2	DOR	0.0205	1	57.906	16.872	13.5	0	0.00588889	100
2	DOR	0.0205	1	57.906	16.872	13.5	0	0.00615657	100
2	DOR	0.0205	1	57.906	16.872	13.5	0	0.00642424	100
2	DOR	0.0205	1	57.906	16.872	13.5	0	0.00669192	100
2	DOR	0.0205	1	57.906	16.872	13.5	0	0.0069596	100
2	DOR	0.0205	1	57.906	16.872	13.5	0	0.00722727	100
2	DOR	0.0205	1	57.906	16.872	13.5	0	0.00749495	100
2	DOR	0.0205	1	57.906	16.872	13.5	0	0.00776263	100
2	DOR	0.0205	1	57.906	16.872	13.5	0	0.0080303	100
2	DOR	0.0205	1	57.906	16.872	13.5	0	0.00829798	100
2	DOR	0.0205	1	57.906	16.872	13.5	0	0.00856566	100
2	DOR	0.0205	1	57.906	16.872	13.5	0	0.00883333	100
2	DOR	0.0205	1	57.906	16.872	13.5	0	0.00910101	100
2	DOR	0.0205	1	57.906	16.872	13.5	0	0.00936869	100
2	DOR	0.0205	1	57.906	16.872	13.5	0	0.00963636	99
2	DOR	0.0205	1	57.906	16.872	13.5	0	0.00990404	99
2	DOR	0.0205	1	57.906	16.872	13.5	0	0.0101717	99
2	DOR	0.0205	1	57.906	16.872	13.5	0	0.0104394	99
2	DOR	0.0205	1	57.906	16.872	13.5	0	0.0107071	99
2	DOR	0.0205	1	57.906	16.872	13.5	0	0.0109747	99
2	DOR	0.0205	1	57.906	16.872	13.5	0	0.0112424	98
2	DOR	0.0205	1	57.906	16.872	13.5	0	0.0115101	98
2	DOR	0.0205	1	57.906	16.872	13.5	0	0.0117778	98
2	DOR	0.0205	1	57.906	16.872	13.5	0	0.0120455	97
2	DOR	0.0205	1	57.906	16.872	13.5	0	0.0123131	97
2	DOR	0.0205	1	57.906	16.872	13.5	0	0.0125808	96
2	DOR	0.0205	1	57.906	16.872	13.5	0	0.0128485	96
2	DOR	0.0205	1	57.906	16.872	13.5	0	0.0131162	95
2	DOR	0.0205	1	57.906	16.872	13.5	0	0.0133838	95
2	DOR	0.0205	1	57.906	16.872	13.5	0	0.0136515	94
2	DOR	0.0205	1	57.906	16.872	13.5	0	0.0139192	93
2	DOR	0.0205	1	57.906	16.872	13.5	0	0.0141869	93
2	DOR	0.0205	1	57.906	16.872	13.5	0	0.0144545	92
2	DOR	0.0205	1	57.906	16.872	13.5	0	0.0147222	91
2	DOR	0.0205	1	57.906	16.872	13.5	0	0.0149899	90
2	DOR	0.0205	1	57.906	16.872	13.5	0	0.0152576	89
2	DOR	0.0205	1	57.906	16.872	13.5	0	0.0155253	87
2	DOR	0.0205	1	57.906	16.872	13.5	0	0.0157929	86
2	DOR	0.0205	1	57.906	16.872	13.5	0	0.0160606	85
2	DOR	0.0205	1	57.906	16.872	13.5	0	0.0163283	84
2	DOR	0.0205	1	57.906	16.872	13.5	0	0.016596	82
2	DOR	0.0205	1	57.906	16.872	13.5	0	0.0168636	81
2	DOR	0.0205	1	57.906	16.872	13.5	0	0.0171313	79
2	DOR	0.0205	1	57.906	16.872	13.5	0	0.017399	77
2	DOR	0.0205	1	57.906	16.872	13.5	0	0.0176667	76
2	DOR	0.0205	1	57.906	16.872	13.5	0	0.0179343	74
2	DOR	0.0205	1	57.906	16.872	13.5	0	0.018202	72
2	DOR	0.0205	1	57.906	16.872	13.5	0	0.0184697	70
2	DOR	0.0205	1	57.906	16.872	13.5	0	0.0187374	69
2	DOR	0.0205	1	57.906	16.872	13.5	0	0.0190051	67
2	DOR	0.0205	1	57.906	16.872	13.5	0	0.0192727	65
2	DOR	0.0205	1	57.906	16.872	13.5	0	0.0195404	63
2	DOR	0.0205	1	57.906	16.872	13.5	0	0.0198081	61
2	DOR	0.0205	1	57.906	16.872	13.5	0	0.0200758	59
2	DOR	0.0205	1	57.906	16.872	13.5	0	0.0203434	57
2	DOR	0.0205	1	57.906	16.872	13.5	0	0.0206111	55
2	DOR	0.0205	1	57.906	16.872	13.5	0	0.0208788	53
2	DOR	0.0205	1	57.906	16.872	13.5	0	0.0211465	52
2	DOR	0.0205	1	57.906	16.872	13.5	0	0.0214141	50
2	DOR	0.0205	1	57.906	16.872	13.5	0	0.0216818	48
2	DOR	0.0205	1	57.906	16.872	13.5	0	0.0219495	46
2	DOR	0.0205	1	57.906	16.872	13.5	0	0.0222172	45
2	DOR	0.0205	1	57.906	16.872	13.5	0	0.0224848	43
2	DOR	0.0205	1	57.906	16.872	13.5	0	0.0227525	41
2	DOR	0.0205	1	57.906	16.872	13.5	0	0.0230202	40
2	DOR	0.0205	1	57.906	16.872	13.5	0	0.0232879	38
2	DOR	0.0205	1	57.906	16.872	13.5	0	0.0235556	37
2	DOR	0.0205	1	57.906	16.872	13.5	0	0.0238232	36
2	DOR	0.0205	1	57.906	16.872	13.5	0	0.0240909	34
2	DOR	0.0205	1	57.906	16.872	13.5	0	0.0243586	33
2	DOR	0.0205	1	57.906	16.872	13.5	0	0.0246263	32
2	DOR	0.0205	1	57.906	16.872	13.5	0	0.0248939	31
2	DOR	0.0205	1	57.906	16.872	13.5	0	0.0251616	30
2	DOR	0.0205	1	57.906	16.872	13.5	0	0.0254293	28
2	DOR	0.0205	1	57.906	16.872	13.5	0	0.025697	27
2	DOR	0.0205	1	57.906	16.872	13.5	0	0.0259646	26
2	DOR	0.0205	1	57.906	16.872	13.5	0	0.0262323	26
2	DOR	0.0205	1	57.906	16.872	13.5	0	0.0265	25
2	DOR	0.0265	7	24.715	4.943	3.955	0	0	100
2	DOR	0.0265	7	24.715	4.943	3.955	0	0.000267677	100
2	DOR	0.0265	7	24.715	4.943	3.955	0	0.000535354	100
2	DOR	0.0265	7	24.715	4.943	3.955	0	0.00080303	100
2	DOR	0.0265	7	24.715	4.943	3.955	0	0.00107071	100
2	DOR	0.0265	7	24.715	4.943	3.955	0	0.00133838	100
2	DOR	0.0265	7	24.715	4.943	3.955	0	0.00160606	100
2	DOR	0.0265	7	24.715	4.943	3.955	0	0.00187374	100
2	DOR	0.0265	7	24.715	4.943	3.955	0	0.00214141	100
2	DOR	0.0265	7	24.715	4.943	3.955	0	0.00240909	100
2	DOR	0.0265	7	24.715	4.943	3.955	0	0.00267677	100
2	DOR	0.0265	7	24.715	4.943	3.955	0	0.00294444	100
2	DOR	0.0265	7	24.715	4.943	3.955	0	0.00321212	100
2	DOR	0.0265	7	24.715	4.943	3.955	0	0.0034798	100
2	DOR	0.0265	7	24.715	4.943	3.955	0	0.00374747	100
2	DOR	0.0265	7	24.715	4.943	3.955	0	0.00401515	100
2	DOR	0.0265	7	24.715	4.943	3.955	0	0.00428283	100
2	DOR	0.0265	7	24.715	4.943	3.955	0	0.00455051	100
2	DOR	0.0265	7	24.715	4.943	3.955	0	0.00481818	100
2	DOR	0.0265	7	24.715	4.943	3.955	0	0.00508586	100
2	DOR	0.0265	7	24.715	4.943	3.955	0	0.00535354	100
2	DOR	0.0265	7	24.715	4.943	3.955	0	0.00562121	100
2	DOR	0.0265	7	24.715	4.943	3.955	0	0.00588889	100
2	DOR	0.0265	7	24.715	4.943	3.955	0	0.00615657	100
2	DOR	0.0265	7	24.715	4.943	3.955	0	0.00642424	100
2	DOR	0.0265	7	24.715	4.943	3.955	0	0.00669192	100
2	DOR	0.0265	7	24.715	4.943	3.955	0	0.0069596	100
2	DOR	0.0265	7	24.715	4.943	3.955	0	0.00722727	100
2	DOR	0.0265	7	24.715	4.943	3.955	0	0.00749495	100
2	DOR	0.0265	7	24.715	4.943	3.955	0	0.00776263	100
2	DOR	0.0265	7	24.715	4.943	3.955	0	0.0080303	100
2	DOR	0.0265	7	24.715	4.943	3.955	0	0.00829798	100
2	DOR	0.0265	7	24.715	4.943	3.955	0	0.00856566	100
2	DOR	0.0265	7	24.715	4.943	3.955	0	0.00883333	100
2	DOR	0.0265	7	24.715	4.943	3.955	0	0.00910101	100
2	DOR	0.0265	7	24.715	4.943	3.955	0	0.00936869	100
2	DOR	0.0265	7	24.715	4.943	3.955	0	0.00963636	99
2	DOR	0.0265	7	24.715	4.943	3.955	0	0.00990404	99
2	DOR	0.0265	7	24.715	4.943	3.955	0	0.0101717	99
2	DOR	0.0265	7	24.715	4.943	3.955	0	0.0104394	99
2	DOR	0.0265	7	24.715	4.943	3.955	0	0.0107071	99
2	DOR	0.0265	7	24.715	4.943	3.955	0	0.0109747	99
2	DOR	0.0265	7	24.715	4.943	3.955	0	0.0112424	98
2	DOR	0.0265	7	24.715	4.943	3.955	0	0.0115101	98
2	DOR	0.0265	7	24.715	4.943	3.955	0	0.0117778	98
2	DOR	0.0265	7	24.715	4.943	3.955	0	0.0120455	97
2	DOR	0.0265	7	24.715	4.943	3.955	0	0.0123131	97
2	DOR	0.0265	7	24.715	4.943	3.955	0	0.0125808	96
2	DOR	0.0265	7	24.715	4.943	3.955	0	0.0128485	96
2	DOR	0.0265	7	24.715	4.943	3.955	0	0.0131162	95
2	DOR	0.0265	7	24.715	4.943	3.955	0	0.0133838	95
2	DOR	0.0265	7	24.715	4.943	3.955	0	0.0136515	94
2	DOR	0.0265	7	24.715	4.943	3.955	0	0.0139192	93
2	DOR	0.0265	7	24.715	4.943	3.955	0	0.0141869	93
2	DOR	0.0265	7	24.715	4.943	3.955	0	0.0144545	92
2	DOR	0.0265	7	24.715	4.943	3.955	0	0.0147222	91
2	DOR	0.0265	7	24.715	4.943	3.955	0	0.0149899	90
2	DOR	0.0265	7	24.715	4.943	3.955	0	0.0152576	89
2	DOR	0.0265	7	24.715	4.943	3.955	0	0.0155253	87
2	DOR	0.0265	7	24.715	4.943	3.955	0	0.0157929	86
2	DOR	0.0265	7	24.715	4.943	3.955	0	0.0160606	85
2	DOR	0.0265	7	24.715	4.943	3.955	0	0.0163283	84
2	DOR	0.0265	7	24.715	4.943	3.955	0	0.016596	82
2	DOR	0.0265	7	24.715	4.943	3.955	0	0.0168636	81
2	DOR	0.0265	7	24.715	4.943	3.955	0	0.0171313	79
2	DOR	0.0265	7	24.715	4.943	3.955	0	0.017399	77
2	DOR	0.0265	7	24.715	4.943	3.955	0	0.0176667	76
2	DOR	0.0265	7	24.715	4.943	3.955	0	0.0179343	74
2	DOR	0.0265	7	24.715	4.943	3.955	0	0.018202	72
2	DOR	0.0265	7	24.715	4.943	3.955	0	0.0184697	70
2	DOR	0.0265	7	24.715	4.943	3.955	0	0.0187374	69
2	DOR	0.0265	7	24.715	4.943	3.955	0	0.0190051	67
2	DOR	0.0265	7	24.715	4.943	3.955	0	0.0192727	65
2	DOR	0.0265	7	24.715	4.943	3.955	0	0.0195404	63
2	DOR	0.0265	7	24.715	4.943	3.955	0	0.0198081	61
2	DOR	0.0265	7	24.715	4.943	3.955	0	0.0200758	59
2	DOR	0.0265	7	24.715	4.943	3.955	0	0.0203434	57
2	DOR	0.0265	7	24.715	4.943	3.955	0	0.0206111	55
2	DOR	0.0265	7	24.715	4.943	3.955	0	0.0208788	53
2	DOR	0.0265	7	24.715	4.943	3.955	0	0.0211465	52
2	DOR	0.0265	7	24.715	4.943	3.955	0	0.0214141	50
2	DOR	0.0265	7	24.715	4.943	3.955	0	0.0216818	48
2	DOR	0.0265	7	24.715	4.943	3.955	0	0.0219495	46
2	DOR	0.0265	7	24.715	4.943	3.955	0	0.0222172	45
2	DOR	0.0265	7	24.715	4.943	3.955	0	0.0224848	43
2	DOR	0.0265	7	24.715	4.943	3.955	0	0.0227525	41
2	DOR	0.0265	7	24.715	4.943	3.955	0	0.0230202	40
2	DOR	0.0265	7	24.715	4.943	3.955	0	0.0232879	38
2	DOR	0.0265	7	24.715	4.943	3.955	0	0.0235556	37
2	DOR	0.0265	7	24.715	4.943	3.955	0	0.0238232	36
2	DOR	0.0265	7	24.715	4.943	3.955	0	0.0240909	34
2	DOR	0.0265	7	24.715	4.943	3.955	0	0.0243586	33
2	DOR	0.0265	7	24.715	4.943	3.955	0	0.0246263	32
2	DOR	0.0265	7	24.715	4.943	3.955	0	0.0248939	31
2	DOR	0.0265	7	24.715	4.943	3.955	0	0.0251616	30
2	DOR	0.0265	7	24.715	4.943	3.955	0	0.0254293	28
2	DOR	0.0265	7	24.715	4.943	3.955	0	0.025697	27
2	DOR	0.0265	7	24.715	4.943	3.955	0	0.0259646	26
2	DOR	0.0265	7	24.715	4.943	3.955	0	0.0262323	26
2	DOR	0.0265	7	24.715	4.943	3.955	0	0.0265	25
2	DOR	0.0255	6	27.422	3.976	3.182	1	0	100
2	DOR	0.0255	6	27.422	3.976	3.182	1	0.000267677	100
2	DOR	0.0255	6	27.422	3.976	3.182	1	0.000535354	100
2	DOR	0.0255	6	27.422	3.976	3.182	1	0.00080303	100
2	DOR	0.0255	6	27.422	3.976	3.182	1	0.00107071	100
2	DOR	0.0255	6	27.422	3.976	3.182	1	0.00133838	100
2	DOR	0.0255	6	27.422	3.976	3.182	1	0.00160606	100
2	DOR	0.0255	6	27.422	3.976	3.182	1	0.00187374	100
2	DOR	0.0255	6	27.422	3.976	3.182	1	0.00214141	100
2	DOR	0.0255	6	27.422	3.976	3.182	1	0.00240909	100
2	DOR	0.0255	6	27.422	3.976	3.182	1	0.00267677	100
2	DOR	0.0255	6	27.422	3.976	3.182	1	0.00294444	100
2	DOR	0.0255	6	27.422	3.976	3.182	1	0.00321212	100
2	DOR	0.0255	6	27.422	3.976	3.182	1	0.0034798	100
2	DOR	0.0255	6	27.422	3.976	3.182	1	0.00374747	100
2	DOR	0.0255	6	27.422	3.976	3.182	1	0.00401515	100
2	DOR	0.0255	6	27.422	3.976	3.182	1	0.00428283	100
2	DOR	0.0255	6	27.422	3.976	3.182	1	0.00455051	100
2	DOR	0.0255	6	27.422	3.976	3.182	1	0.00481818	100
2	DOR	0.0255	6	27.422	3.976	3.182	1	0.00508586	100
2	DOR	0.0255	6	27.422	3.976	3.182	1	0.00535354	100
2	DOR	0.0255	6	27.422	3.976	3.182	1	0.00562121	100
2	DOR	0.0255	6	27.422	3.976	3.182	1	0.00588889	100
2	DOR	0.0255	6	27.422	3.976	3.182	1	0.00615657	100
2	DOR	0.0255	6	27.422	3.976	3.182	1	0.00642424	100
2	DOR	0.0255	6	27.422	3.976	3.182	1	0.00669192	100
2	DOR	0.0255	6	27.422	3.976	3.182	1	0.0069596	100
2	DOR	0.0255	6	27.422	3.976	3.182	1	0.00722727	100
2	DOR	0.0255	6	27.422	3.976	3.182	1	0.00749495	100
2	DOR	0.0255	6	27.422	3.976	3.182	1	0.00776263	100
2	DOR	0.0255	6	27.422	3.976	3.182	1	0.0080303	100
2	DOR	0.0255	6	27.422	3.976	3.182	1	0.00829798	100
2	DOR	0.0255	6	27.422	3.976	3.182	1	0.00856566	100
2	DOR	0.0255	6	27.422	3.976	3.182	1	0.00883333	100
2	DOR	0.0255	6	27.422	3.976	3.182	1	0.00910101	100
2	DOR	0.0255	6	27.422	3.976	3.182	1	0.00936869	100
2	DOR	0.0255	6	27.422	3.976	3.182	1	0.00963636	99
2	DOR	0.0255	6	27.422	3.976	3.182	1	0.00990404	99
2	DOR	0.0255	6	27.422	3.976	3.182	1	0.0101717	99
2	DOR	0.0255	6	27.422	3.976	3.182	1	0.0104394	99
2	DOR	0.0255	6	27.422	3.976	3.182	1	0.0107071	99
2	DOR	0.0255	6	27.422	3.976	3.182	1	0.0109747	99
2	DOR	0.0255	6	27.422	3.976	3.182	1	0.0112424	98
2	DOR	0.0255	6	27.422	3.976	3.182	1	0.0115101	98
2	DOR	0.0255	6	27.422	3.976	3.182	1	0.0117778	98
2	DOR	0.0255	6	27.422	3.976	3.182	1	0.0120455	97
2	DOR	0.0255	6	27.422	3.976	3.182	1	0.0123131	97
2	DOR	0.0255	6	27.422	3.976	3.182	1	0.0125808	96
2	DOR	0.0255	6	27.422	3.976	3.182	1	0.0128485	96
2	DOR	0.0255	6	27.422	3.976	3.182	1	0.0131162	95
2	DOR	0.0255	6	27.422	3.976	3.182	1	0.0133838	95
2	DOR	0.0255	6	27.422	3.976	3.182	1	0.0136515	94
2	DOR	0.0255	6	27.422	3.976	3.182	1	0.0139192	93
2	DOR	0.0255	6	27.422	3.976	3.182	1	0.0141869	93
2	DOR	0.0255	6	27.422	3.976	3.182	1	0.0144545	92
2	DOR	0.0255	6	27.422	3.976	3.182	1	0.0147222	91
2	DOR	0.0255	6	27.422	3.976	3.182	1	0.0149899	90
2	DOR	0.0255	6	27.422	3.976	3.182	1	0.0152576	89
2	DOR	0.0255	6	27.422	3.976	3.182	1	0.0155253	87
2	DOR	0.0255	6	27.422	3.976	3.182	1	0.0157929	86
2	DOR	0.0255	6	27.422	3.976	3.182	1	0.0160606	85
2	DOR	0.0255	6	27.422	3.976	3.182	1	0.0163283	84
2	DOR	0.0255	6	27.422	3.976	3.182	1	0.016596	82
2	DOR	0.0255	6	27.422	3.976	3.182	1	0.0168636	81
2	DOR	0.0255	6	27.422	3.976	3.182	1	0.0171313	79
2	DOR	0.0255	6	27.422	3.976	3.182	1	0.017399	77
2	DOR	0.0255	6	27.422	3.976	3.182	1	0.0176667	76
2	DOR	0.0255	6	27.422	3.976	3.182	1	0.0179343	74
2	DOR	0.0255	6	27.422	3.976	3.182	1	0.018202	72
2	DOR	0.0255	6	27.422	3.976	3.182	1	0.0184697	70
2	DOR	0.0255	6	27.422	3.976	3.182	1	0.0187374	69
2	DOR	0.0255	6	27.422	3.976	3.182	1	0.0190051	67
2	DOR	0.0255	6	27.422	3.976	3.182	1	0.0192727	65
2	DOR	0.0255	6	27.422	3.976	3.182	1	0.0195404	63
2	DOR	0.0255	6	27.422	3.976	3.182	1	0.0198081	61
2	DOR	0.0255	6	27.422	3.976	3.182	1	0.0200758	59
2	DOR	0.0255	6	27.422	3.976	3.182	1	0.0203434	57
2	DOR	0.0255	6	27.422	3.976	3.182	1	0.0206111	55
2	DOR	0.0255	6	27.422	3.976	3.182	1	0.0208788	53
2	DOR	0.0255	6	27.422	3.976	3.182	1	0.0211465	52
2	DOR	0.0255	6	27.422	3.976	3.182	1	0.0214141	50
2	DOR	0.0255	6	27.422	3.976	3.182	1	0.0216818	48
2	DOR	0.0255	6	27.422	3.976	3.182	1	0.0219495	46
2	DOR	0.0255	6	27.422	3.976	3.182	1	0.0222172	45
2	DOR	0.0255	6	27.422	3.976	3.182	1	0.0224848	43
2	DOR	0.0255	6	27.422	3.976	3.182	1	0.0227525	41
2	DOR	0.0255	6	27.422	3.976	3.182	1	0.0230202	40
2	DOR	0.0255	6	27.422	3.976	3.182	1	0.0232879	38
2	DOR	0.0255	6	27.422	3.976	3.182	1	0.0235556	37
2	DOR	0.0255	6	27.422	3.976	3.182	1	0.0238232	36
2	DOR	0.0255	6	27.422	3.976	3.182	1	0.0240909	34
2	DOR	0.0255	6	27.422	3.976	3.182	1	0.0243586	33
2	DOR	0.0255	6	27.422	3.976	3.182	1	0.0246263	32
2	DOR	0.0255	6	27.422	3.976	3.182	1	0.0248939	31
2	DOR	0.0255	6	27.422	3.976	3.182	1	0.0251616	30
2	DOR	0.0255	6	27.422	3.976	3.182	1	0.0254293	28
2	DOR	0.0255	6	27.422	3.976	3.182	1	0.025697	27
2	DOR	0.0255	6	27.422	3.976	3.182	1	0.0259646	26
2	DOR	0.0255	6	27.422	3.976	3.182	1	0.0262323	26
2	DOR	0.0255	6	27.422	3.976	3.182	1	0.0265	25
2	STR	10.3	7	27.503	8.527	6.823	1	0	100
2	STR	10.3	7	27.503	8.527	6.823	1	0.10404	100
2	STR	10.3	7	27.503	8.527	6.823	1	0.208081	100
2	STR	10.3	7	27.503	8.527	6.823	1	0.312121	100
2	STR	10.3	7	27.503	8.527	6.823	1	0.416162	100
2	STR	10.3	7	27.503	8.527	6.823	1	0.520202	100
2	STR	10.3	7	27.503	8.527	6.823	1	0.624242	100
2	STR	10.3	7	27.503	8.527	6.823	1	0.728283	100
2	STR	10.3	7	27.503	8.527	6.823	1	0.832323	100
2	STR	10.3	7	27.503	8.527	6.823	1	0.936364	100
2	STR	10.3	7	27.503	8.527	6.823	1	1.0404	100
2	STR	10.3	7	27.503	8.527	6.823	1	1.14444	100
2	STR	10.3	7	27.503	8.527	6.823	1	1.24848	100
2	STR	10.3	7	27.503	8.527	6.823	1	1.35253	100
2	STR	10.3	7	27.503	8.527	6.823	1	1.45657	100
2	STR	10.3	7	27.503	8.527	6.823	1	1.56061	100
2	STR	10.3	7	27.503	8.527	6.823	1	1.66465	100
2	STR	10.3	7	27.503	8.527	6.823	1	1.76869	100
2	STR	10.3	7	27.503	8.527	6.823	1	1.87273	100
2	STR	10.3	7	27.503	8.527	6.823	1	1.97677	100
2	STR	10.3	7	27.503	8.527	6.823	1	2.08081	100
2	STR	10.3	7	27.503	8.527	6.823	1	2.18485	100
2	STR	10.3	7	27.503	8.527	6.823	1	2.28889	100
2	STR	10.3	7	27.503	8.527	6.823	1	2.39293	100
2	STR	10.3	7	27.503	8.527	6.823	1	2.49697	100
2	STR	10.3	7	27.503	8.527	6.823	1	2.60101	100
2	STR	10.3	7	27.503	8.527	6.823	1	2.70505	100
2	STR	10.3	7	27.503	8.527	6.823	1	2.80909	100
2	STR	10.3	7	27.503	8.527	6.823	1	2.91313	100
2	STR	10.3	7	27.503	8.527	6.823	1	3.01717	100
2	STR	10.3	7	27.503	8.527	6.823	1	3.12121	100
2	STR	10.3	7	27.503	8.527	6.823	1	3.22525	100
2	STR	10.3	7	27.503	8.527	6.823	1	3.32929	100
2	STR	10.3	7	27.503	8.527	6.823	1	3.43333	100
2	STR	10.3	7	27.503	8.527	6.823	1	3.53737	100
2	STR	10.3	7	27.503	8.527	6.823	1	3.64141	100
2	STR	10.3	7	27.503	8.527	6.823	1	3.74545	100
2	STR	10.3	7	27.503	8.527	6.823	1	3.84949	100
2	STR	10.3	7	27.503	8.527	6.823	1	3.95354	100
2	STR	10.3	7	27.503	8.527	6.823	1	4.05758	100
2	STR	10.3	7	27.503	8.527	6.823	1	4.16162	100
2	STR	10.3	7	27.503	8.527	6.823	1	4.26566	100
2	STR	10.3	7	27.503	8.527	6.823	1	4.3697	100
2	STR	10.3	7	27.503	8.527	6.823	1	4.47374	100
2	STR	10.3	7	27.503	8.527	6.823	1	4.57778	100
2	STR	10.3	7	27.503	8.527	6.823	1	4.68182	100
2	STR	10.3	7	27.503	8.527	6.823	1	4.78586	100
2	STR	10.3	7	27.503	8.527	6.823	1	4.8899	100
2	STR	10.3	7	27.503	8.527	6.823	1	4.99394	100
2	STR	10.3	7	27.503	8.527	6.823	1	5.09798	100
2	STR	10.3	7	27.503	8.527	6.823	1	5.20202	100
2	STR	10.3	7	27.503	8.527	6.823	1	5.30606	100
2	STR	10.3	7	27.503	8.527	6.823	1	5.4101	100
2	STR	10.3	7	27.503	8.527	6.823	1	5.51414	100
2	STR	10.3	7	27.503	8.527	6.823	1	5.61818	100
2	STR	10.3	7	27.503	8.527	6.823	1	5.72222	100
2	STR	10.3	7	27.503	8.527	6.823	1	5.82626	100
2	STR	10.3	7	27.503	8.527	6.823	1	5.9303	100
2	STR	10.3	7	27.503	8.527	6.823	1	6.03434	100
2	STR	10.3	7	27.503	8.527	6.823	1	6.13838	100
2	STR	10.3	7	27.503	8.527	6.823	1	6.24242	100
2	STR	10.3	7	27.503	8.527	6.823	1	6.34646	100
2	STR	10.3	7	27.503	8.527	6.823	1	6.45051	100
2	STR	10.3	7	27.503	8.527	6.823	1	6.55455	100
2	STR	10.3	7	27.503	8.527	6.823	1	6.65859	100
2	STR	10.3	7	27.503	8.527	6.823	1	6.76263	100
2	STR	10.3	7	27.503	8.527	6.823	1	6.86667	100
2	STR	10.3	7	27.503	8.527	6.823	1	6.97071	100
2	STR	10.3	7	27.503	8.527	6.823	1	7.07475	100
2	STR	10.3	7	27.503	8.527	6.823	1	7.17879	100
2	STR	10.3	7	27.503	8.527	6.823	1	7.28283	100
2	STR	10.3	7	27.503	8.527	6.823	1	7.38687	100
2	STR	10.3	7	27.503	8.527	6.823	1	7.49091	100
2	STR	10.3	7	27.503	8.527	6.823	1	7.59495	100
2	STR	10.3	7	27.503	8.527	6.823	1	7.69899	100
2	STR	10.3	7	27.503	8.527	6.823	1	7.80303	100
2	STR	10.3	7	27.503	8.527	6.823	1	7.90707	100
2	STR	10.3	7	27.503	8.527	6.823	1	8.01111	100
2	STR	10.3	7	27.503	8.527	6.823	1	8.11515	100
2	STR	10.3	7	27.503	8.527	6.823	1	8.21919	100
2	STR	10.3	7	27.503	8.527	6.823	1	8.32323	100
2	STR	10.3	7	27.503	8.527	6.823	1	8.42727	100
2	STR	10.3	7	27.503	8.527	6.823	1	8.53131	100
2	STR	10.3	7	27.503	8.527	6.823	1	8.63535	100
2	STR	10.3	7	27.503	8.527	6.823	1	8.73939	100
2	STR	10.3	7	27.503	8.527	6.823	1	8.84343	100
2	STR	10.3	7	27.503	8.527	6.823	1	8.94747	100
2	STR	10.3	7	27.503	8.527	6.823	1	9.05152	100
2	STR	10.3	7	27.503	8.527	6.823	1	9.15556	100
2	STR	10.3	7	27.503	8.527	6.823	1	9.2596	100
2	STR	10.3	7	27.503	8.527	6.823	1	9.36364	100
2	STR	10.3	7	27.503	8.527	6.823	1	9.46768	100
2	STR	10.3	7	27.503	8.527	6.823	1	9.57172	96
2	STR	10.3	7	27.503	8.527	6.823	1	9.67576	71
2	STR	10.3	7	27.503	8.527	6.823	1	9.7798	45
2	STR	10.3	7	27.503	8.527	6.823	1	9.88384	40
2	STR	10.3	7	27.503	8.527	6.823	1	9.98788	40
2	STR	10.3	7	27.503	8.527	6.823	1	10.0919	40
2	STR	10.3	7	27.503	8.527	6.823	1	10.196	40
2	STR	10.3	7	27.503	8.527	6.823	1	10.3	40
2	STR	9.9	3	48.217	5.627	4.503	0	0	100
2	STR	9.9	3	48.217	5.627	4.503	0	0.10404	100
2	STR	9.9	3	48.217	5.627	4.503	0	0.208081	100
2	STR	9.9	3	48.217	5.627	4.503	0	0.312121	100
2	STR	9.9	3	48.217	5.627	4.503	0	0.416162	100
2	STR	9.9	3	48.217	5.627	4.503	0	0.520202	100
2	STR	9.9	3	48.217	5.627	4.503	0	0.624242	100
2	STR	9.9	3	48.217	5.627	4.503	0	0.728283	100
2	STR	9.9	3	48.217	5.627	4.503	0	0.832323	100
2	STR	9.9	3	48.217	5.627	4.503	0	0.936364	100
2	STR	9.9	3	48.217	5.627	4.503	0	1.0404	100
2	STR	9.9	3	48.217	5.627	4.503	0	1.14444	100
2	STR	9.9	3	48.217	5.627	4.503	0	1.24848	100
2	STR	9.9	3	48.217	5.627	4.503	0	1.35253	100
2	STR	9.9	3	48.217	5.627	4.503	0	1.45657	100
2	STR	9.9	3	48.217	5.627	4.503	0	1.56061	100
2	STR	9.9	3	48.217	5.627	4.503	0	1.66465	100
2	STR	9.9	3	48.217	5.627	4.503	0	1.76869	100
2	STR	9.9	3	48.217	5.627	4.503	0	1.87273	100
2	STR	9.9	3	48.217	5.627	4.503	0	1.97677	100
2	STR	9.9	3	48.217	5.627	4.503	0	2.08081	100
2	STR	9.9	3	48.217	5.627	4.503	0	2.18485	100
2	STR	9.9	3	48.217	5.627	4.503	0	2.28889	100
2	STR	9.9	3	48.217	5.627	4.503	0	2.39293	100
2	STR	9.9	3	48.217	5.627	4.503	0	2.49697	100
2	STR	9.9	3	48.217	5.627	4.503	0	2.60101	100
2	STR	9.9	3	48.217	5.627	4.503	0	2.70505	100
2	STR	9.9	3	48.217	5.627	4.503	0	2.80909	100
2	STR	9.9	3	48.217	5.627	4.503	0	2.91313	100
2	STR	9.9	3	48.217	5.627	4.503	0	3.01717	100
2	STR	9.9	3	48.217	5.627	4.503	0	3.12121	100
2	STR	9.9	3	48.217	5.627	4.503	0	3.22525	100
2	STR	9.9	3	48.217	5.627	4.503	0	3.32929	100
2	STR	9.9	3	48.217	5.627	4.503	0	3.43333	100
2	STR	9.9	3	48.217	5.627	4.503	0	3.53737	100
2	STR	9.9	3	48.217	5.627	4.503	0	3.64141	100
2	STR	9.9	3	48.217	5.627	4.503	0	3.74545	100
2	STR	9.9	3	48.217	5.627	4.503	0	3.84949	100
2	STR	9.9	3	48.217	5.627	4.503	0	3.95354	100
2	STR	9.9	3	48.217	5.627	4.503	0	4.05758	100
2	STR	9.9	3	48.217	5.627	4.503	0	4.16162	100
2	STR	9.9	3	48.217	5.627	4.503	0	4.26566	100
2	STR	9.9	3	48.217	5.627	4.503	0	4.3697	100
2	STR	9.9	3	48.217	5.627	4.503	0	4.47374	100
2	STR	9.9	3	48.217	5.627	4.503	0	4.57778	100
2	STR	9.9	3	48.217	5.627	4.503	0	4.68182	100
2	STR	9.9	3	48.217	5.627	4.503	0	4.78586	100
2	STR	9.9	3	48.217	5.627	4.503	0	4.8899	100
2	STR	9.9	3	48.217	5.627	4.503	0	4.99394	100
2	STR	9.9	3	48.217	5.627	4.503	0	5.09798	100
2	STR	9.9	3	48.217	5.627	4.503	0	5.20202	100
2	STR	9.9	3	48.217	5.627	4.503	0	5.30606	100
2	STR	9.9	3	48.217	5.627	4.503	0	5.4101	100
2	STR	9.9	3	48.217	5.627	4.503	0	5.51414	100
2	STR	9.9	3	48.217	5.627	4.503	0	5.61818	100
2	STR	9.9	3	48.217	5.627	4.503	0	5.72222	100
2	STR	9.9	3	48.217	5.627	4.503	0	5.82626	100
2	STR	9.9	3	48.217	5.627	4.503	0	5.9303	100
2	STR	9.9	3	48.217	5.627	4.503	0	6.03434	100
2	STR	9.9	3	48.217	5.627	4.503	0	6.13838	100
2	STR	9.9	3	48.217	5.627	4.503	0	6.24242	100
2	STR	9.9	3	48.217	5.627	4.503	0	6.34646	100
2	STR	9.9	3	48.217	5.627	4.503	0	6.45051	100
2	STR	9.9	3	48.217	5.627	4.503	0	6.55455	100
2	STR	9.9	3	48.217	5.627	4.503	0	6.65859	100
2	STR	9.9	3	48.217	5.627	4.503	0	6.76263	100
2	STR	9.9	3	48.217	5.627	4.503	0	6.86667	100
2	STR	9.9	3	48.217	5.627	4.503	0	6.97071	100
2	STR	9.9	3	48.217	5.627	4.503	0	7.07475	100
2	STR	9.9	3	48.217	5.627	4.503	0	7.17879	100
2	STR	9.9	3	48.217	5.627	4.503	0	7.28283	100
2	STR	9.9	3	48.217	5.627	4.503	0	7.38687	100
2	STR	9.9	3	48.217	5.627	4.503	0	7.49091	100
2	STR	9.9	3	48.217	5.627	4.503	0	7.59495	100
2	STR	9.9	3	48.217	5.627	4.503	0	7.69899	100
2	STR	9.9	3	48.217	5.627	4.503	0	7.80303	100
2	STR	9.9	3	48.217	5.627	4.503	0	7.90707	100
2	STR	9.9	3	48.217	5.627	4.503	0	8.01111	100
2	STR	9.9	3	48.217	5.627	4.503	0	8.11515	100
2	STR	9.9	3	48.217	5.627	4.503	0	8.21919	100
2	STR	9.9	3	48.217	5.627	4.503	0	8.32323	100
2	STR	9.9	3	48.217	5.627	4.503	0	8.42727	100
2	STR	9.9	3	48.217	5.627	4.503	0	8.53131	100
2	STR	9.9	3	48.217	5.627	4.503	0	8.63535	100
2	STR	9.9	3	48.217	5.627	4.503	0	8.73939	100
2	STR	9.9	3	48.217	5.627	4.503	0	8.84343	100
2	STR	9.9	3	48.217	5.627	4.503	0	8.94747	100
2	STR	9.9	3	48.217	5.627	4.503	0	9.05152	100
2	STR	9.9	3	48.217	5.627	4.503	0	9.15556	100
2	STR	9.9	3	48.217	5.627	4.503	0	9.2596	100
2	STR	9.9	3	48.217	5.627	4.503	0	9.36364	100
2	STR	9.9	3	48.217	5.627	4.503	0	9.46768	100
2	STR	9.9	3	48.217	5.627	4.503	0	9.57172	96
2	STR	9.9	3	48.217	5.627	4.503	0	9.67576	71
2	STR	9.9	3	48.217	5.627	4.503	0	9.7798	45
2	STR	9.9	3	48.217	5.627	4.503	0	9.88384	40
2	STR	9.9	3	48.217	5.627	4.503	0	9.98788	40
2	STR	9.9	3	48.217	5.627	4.503	0	10.0919	40
2	STR	9.9	3	48.217	5.627	4.503	0	10.196	40
2	STR	9.9	3	48.217	5.627	4.503	0	10.3	40
2	STR	0	0	99.863	6.239	4.992	0	0	100
2	STR	0	0	99.863	6.239	4.992	0	0.10404	100
2	STR	0	0	99.863	6.239	4.992	0	0.208081	100
2	STR	0	0	99.863	6.239	4.992	0	0.312121	100
2	STR	0	0	99.863	6.239	4.992	0	0.416162	100
2	STR	0	0	99.863	6.239	4.992	0	0.520202	100
2	STR	0	0	99.863	6.239	4.992	0	0.624242	100
2	STR	0	0	99.863	6.239	4.992	0	0.728283	100
2	STR	0	0	99.863	6.239	4.992	0	0.832323	100
2	STR	0	0	99.863	6.239	4.992	0	0.936364	100
2	STR	0	0	99.863	6.239	4.992	0	1.0404	100
2	STR	0	0	99.863	6.239	4.992	0	1.14444	100
2	STR	0	0	99.863	6.239	4.992	0	1.24848	100
2	STR	0	0	99.863	6.239	4.992	0	1.35253	100
2	STR	0	0	99.863	6.239	4.992	0	1.45657	100
2	STR	0	0	99.863	6.239	4.992	0	1.56061	100
2	STR	0	0	99.863	6.239	4.992	0	1.66465	100
2	STR	0	0	99.863	6.239	4.992	0	1.76869	100
2	STR	0	0	99.863	6.239	4.992	0	1.87273	100
2	STR	0	0	99.863	6.239	4.992	0	1.97677	100
2	STR	0	0	99.863	6.239	4.992	0	2.08081	100
2	STR	0	0	99.863	6.239	4.992	0	2.18485	100
2	STR	0	0	99.863	6.239	4.992	0	2.28889	100
2	STR	0	0	99.863	6.239	4.992	0	2.39293	100
2	STR	0	0	99.863	6.239	4.992	0	2.49697	100
2	STR	0	0	99.863	6.239	4.992	0	2.60101	100
2	STR	0	0	99.863	6.239	4.992	0	2.70505	100
2	STR	0	0	99.863	6.239	4.992	0	2.80909	100
2	STR	0	0	99.863	6.239	4.992	0	2.91313	100
2	STR	0	0	99.863	6.239	4.992	0	3.01717	100
2	STR	0	0	99.863	6.239	4.992	0	3.12121	100
2	STR	0	0	99.863	6.239	4.992	0	3.22525	100
2	STR	0	0	99.863	6.239	4.992	0	3.32929	100
2	STR	0	0	99.863	6.239	4.992	0	3.43333	100
2	STR	0	0	99.863	6.239	4.992	0	3.53737	100
2	STR	0	0	99.863	6.239	4.992	0	3.64141	100
2	STR	0	0	99.863	6.239	4.992	0	3.74545	100
2	STR	0	0	99.863	6.239	4.992	0	3.84949	100
2	STR	0	0	99.863	6.239	4.992	0	3.95354	100
2	STR	0	0	99.863	6.239	4.992	0	4.05758	100
2	STR	0	0	99.863	6.239	4.992	0	4.16162	100
2	STR	0	0	99.863	6.239	4.992	0	4.26566	100
2	STR	0	0	99.863	6.239	4.992	0	4.3697	100
2	STR	0	0	99.863	6.239	4.992	0	4.47374	100
2	STR	0	0	99.863	6.239	4.992	0	4.57778	100
2	STR	0	0	99.863	6.239	4.992	0	4.68182	100
2	STR	0	0	99.863	6.239	4.992	0	4.78586	100
2	STR	0	0	99.863	6.239	4.992	0	4.8899	100
2	STR	0	0	99.863	6.239	4.992	0	4.99394	100
2	STR	0	0	99.863	6.239	4.992	0	5.09798	100
2	STR	0	0	99.863	6.239	4.992	0	5.20202	100
2	STR	0	0	99.863	6.239	4.992	0	5.30606	100
2	STR	0	0	99.863	6.239	4.992	0	5.4101	100
2	STR	0	0	99.863	6.239	4.992	0	5.51414	100
2	STR	0	0	99.863	6.239	4.992	0	5.61818	100
2	STR	0	0	99.863	6.239	4.992	0	5.72222	100
2	STR	0	0	99.863	6.239	4.992	0	5.82626	100
2	STR	0	0	99.863	6.239	4.992	0	5.9303	100
2	STR	0	0	99.863	6.239	4.992	0	6.03434	100
2	STR	0	0	99.863	6.239	4.992	0	6.13838	100
2	STR	0	0	99.863	6.239	4.992	0	6.24242	100
2	STR	0	0	99.863	6.239	4.992	0	6.34646	100
2	STR	0	0	99.863	6.239	4.992	0	6.45051	100
2	STR	0	0	99.863	6.239	4.992	0	6.55455	100
2	STR	0	0	99.863	6.239	4.992	0	6.65859	100
2	STR	0	0	99.863	6.239	4.992	0	6.76263	100
2	STR	0	0	99.863	6.239	4.992	0	6.86667	100
2	STR	0	0	99.863	6.239	4.992	0	6.97071	100
2	STR	0	0	99.863	6.239	4.992	0	7.07475	100
2	STR	0	0	99.863	6.239	4.992	0	7.17879	100
2	STR	0	0	99.863	6.239	4.992	0	7.28283	100
2	STR	0	0	99.863	6.239	4.992	0	7.38687	100
2	STR	0	0	99.863	6.239	4.992	0	7.49091	100
2	STR	0	0	99.863	6.239	4.992	0	7.59495	100
2	STR	0	0	99.863	6.239	4.992	0	7.69899	100
2	STR	0	0	99.863	6.239	4.992	0	7.80303	100
2	STR	0	0	99.863	6.239	4.992	0	7.90707	100
2	STR	0	0	99.863	6.239	4.992	0	8.01111	100
2	STR	0	0	99.863	6.239	4.992	0	8.11515	100
2	STR	0	0	99.863	6.239	4.992	0	8.21919	100
2	STR	0	0	99.863	6.239	4.992	0	8.32323	100
2	STR	0	0	99.863	6.239	4.992	0	8.42727	100
2	STR	0	0	99.863	6.239	4.992	0	8.53131	100
2	STR	0	0	99.863	6.239	4.992	0	8.63535	100
2	STR	0	0	99.863	6.239	4.992	0	8.73939	100
2	STR	0	0	99.863	6.239	4.992	0	8.84343	100
2	STR	0	0	99.863	6.239	4.992	0	8.94747	100
2	STR	0	0	99.863	6.239	4.992	0	9.05152	100
2	STR	0	0	99.863	6.239	4.992	0	9.15556	100
2	STR	0	0	99.863	6.239	4.992	0	9.2596	100
2	STR	0	0	99.863	6.239	4.992	0	9.36364	100
2	STR	0	0	99.863	6.239	4.992	0	9.46768	100
2	STR	0	0	99.863	6.239	4.992	0	9.57172	96
2	STR	0	0	99.863	6.239	4.992	0	9.67576	71
2	STR	0	0	99.863	6.239	4.992	0	9.7798	45
2	STR	0	0	99.863	6.239	4.992	0	9.88384	40
2	STR	0	0	99.863	6.239	4.992	0	9.98788	40
2	STR	0	0	99.863	6.239	4.992	0	10.0919	40
2	STR	0	0	99.863	6.239	4.992	0	10.196	40
2	STR	0	0	99.863	6.239	4.992	0	10.3	40
2	STR	9.8	2	41.495	10.095	8.078	0	0	100
2	STR	9.8	2	41.495	10.095	8.078	0	0.10404	100
2	STR	9.8	2	41.495	10.095	8.078	0	0.208081	100
2	STR	9.8	2	41.495	10.095	8.078	0	0.312121	100
2	STR	9.8	2	41.495	10.095	8.078	0	0.416162	100
2	STR	9.8	2	41.495	10.095	8.078	0	0.520202	100
2	STR	9.8	2	41.495	10.095	8.078	0	0.624242	100
2	STR	9.8	2	41.495	10.095	8.078	0	0.728283	100
2	STR	9.8	2	41.495	10.095	8.078	0	0.832323	100
2	STR	9.8	2	41.495	10.095	8.078	0	0.936364	100
2	STR	9.8	2	41.495	10.095	8.078	0	1.0404	100
2	STR	9.8	2	41.495	10.095	8.078	0	1.14444	100
2	STR	9.8	2	41.495	10.095	8.078	0	1.24848	100
2	STR	9.8	2	41.495	10.095	8.078	0	1.35253	100
2	STR	9.8	2	41.495	10.095	8.078	0	1.45657	100
2	STR	9.8	2	41.495	10.095	8.078	0	1.56061	100
2	STR	9.8	2	41.495	10.095	8.078	0	1.66465	100
2	STR	9.8	2	41.495	10.095	8.078	0	1.76869	100
2	STR	9.8	2	41.495	10.095	8.078	0	1.87273	100
2	STR	9.8	2	41.495	10.095	8.078	0	1.97677	100
2	STR	9.8	2	41.495	10.095	8.078	0	2.08081	100
2	STR	9.8	2	41.495	10.095	8.078	0	2.18485	100
2	STR	9.8	2	41.495	10.095	8.078	0	2.28889	100
2	STR	9.8	2	41.495	10.095	8.078	0	2.39293	100
2	STR	9.8	2	41.495	10.095	8.078	0	2.49697	100
2	STR	9.8	2	41.495	10.095	8.078	0	2.60101	100
2	STR	9.8	2	41.495	10.095	8.078	0	2.70505	100
2	STR	9.8	2	41.495	10.095	8.078	0	2.80909	100
2	STR	9.8	2	41.495	10.095	8.078	0	2.91313	100
2	STR	9.8	2	41.495	10.095	8.078	0	3.01717	100
2	STR	9.8	2	41.495	10.095	8.078	0	3.12121	100
2	STR	9.8	2	41.495	10.095	8.078	0	3.22525	100
2	STR	9.8	2	41.495	10.095	8.078	0	3.32929	100
2	STR	9.8	2	41.495	10.095	8.078	0	3.43333	100
2	STR	9.8	2	41.495	10.095	8.078	0	3.53737	100
2	STR	9.8	2	41.495	10.095	8.078	0	3.64141	100
2	STR	9.8	2	41.495	10.095	8.078	0	3.74545	100
2	STR	9.8	2	41.495	10.095	8.078	0	3.84949	100
2	STR	9.8	2	41.495	10.095	8.078	0	3.95354	100
2	STR	9.8	2	41.495	10.095	8.078	0	4.05758	100
2	STR	9.8	2	41.495	10.095	8.078	0	4.16162	100
2	STR	9.8	2	41.495	10.095	8.078	0	4.26566	100
2	STR	9.8	2	41.495	10.095	8.078	0	4.3697	100
2	STR	9.8	2	41.495	10.095	8.078	0	4.47374	100
2	STR	9.8	2	41.495	10.095	8.078	0	4.57778	100
2	STR	9.8	2	41.495	10.095	8.078	0	4.68182	100
2	STR	9.8	2	41.495	10.095	8.078	0	4.78586	100
2	STR	9.8	2	41.495	10.095	8.078	0	4.8899	100
2	STR	9.8	2	41.495	10.095	8.078	0	4.99394	100
2	STR	9.8	2	41.495	10.095	8.078	0	5.09798	100
2	STR	9.8	2	41.495	10.095	8.078	0	5.20202	100
2	STR	9.8	2	41.495	10.095	8.078	0	5.30606	100
2	STR	9.8	2	41.495	10.095	8.078	0	5.4101	100
2	STR	9.8	2	41.495	10.095	8.078	0	5.51414	100
2	STR	9.8	2	41.495	10.095	8.078	0	5.61818	100
2	STR	9.8	2	41.495	10.095	8.078	0	5.72222	100
2	STR	9.8	2	41.495	10.095	8.078	0	5.82626	100
2	STR	9.8	2	41.495	10.095	8.078	0	5.9303	100
2	STR	9.8	2	41.495	10.095	8.078	0	6.03434	100
2	STR	9.8	2	41.495	10.095	8.078	0	6.13838	100
2	STR	9.8	2	41.495	10.095	8.078	0	6.24242	100
2	STR	9.8	2	41.495	10.095	8.078	0	6.34646	100
2	STR	9.8	2	41.495	10.095	8.078	0	6.45051	100
2	STR	9.8	2	41.495	10.095	8.078	0	6.55455	100
2	STR	9.8	2	41.495	10.095	8.078	0	6.65859	100
2	STR	9.8	2	41.495	10.095	8.078	0	6.76263	100
2	STR	9.8	2	41.495	10.095	8.078	0	6.86667	100
2	STR	9.8	2	41.495	10.095	8.078	0	6.97071	100
2	STR	9.8	2	41.495	10.095	8.078	0	7.07475	100
2	STR	9.8	2	41.495	10.095	8.078	0	7.17879	100
2	STR	9.8	2	41.495	10.095	8.078	0	7.28283	100
2	STR	9.8	2	41.495	10.095	8.078	0	7.38687	100
2	STR	9.8	2	41.495	10.095	8.078	0	7.49091	100
2	STR	9.8	2	41.495	10.095	8.078	0	7.59495	100
2	STR	9.8	2	41.495	10.095	8.078	0	7.69899	100
2	STR	9.8	2	41.495	10.095	8.078	0	7.80303	100
2	STR	9.8	2	41.495	10.095	8.078	0	7.90707	100
2	STR	9.8	2	41.495	10.095	8.078	0	8.01111	100
2	STR	9.8	2	41.495	10.095	8.078	0	8.11515	100
2	STR	9.8	2	41.495	10.095	8.078	0	8.21919	100
2	STR	9.8	2	41.495	10.095	8.078	0	8.32323	100
2	STR	9.8	2	41.495	10.095	8.078	0	8.42727	100
2	STR	9.8	2	41.495	10.095	8.078	0	8.53131	100
2	STR	9.8	2	41.495	10.095	8.078	0	8.63535	100
2	STR	9.8	2	41.495	10.095	8.078	0	8.73939	100
2	STR	9.8	2	41.495	10.095	8.078	0	8.84343	100
2	STR	9.8	2	41.495	10.095	8.078	0	8.94747	100
2	STR	9.8	2	41.495	10.095	8.078	0	9.05152	100
2	STR	9.8	2	41.495	10.095	8.078	0	9.15556	100
2	STR	9.8	2	41.495	10.095	8.078	0	9.2596	100
2	STR	9.8	2	41.495	10.095	8.078	0	9.36364	100
2	STR	9.8	2	41.495	10.095	8.078	0	9.46768	100
2	STR	9.8	2	41.495	10.095	8.078	0	9.57172	96
2	STR	9.8	2	41.495	10.095	8.078	0	9.67576	71
2	STR	9.8	2	41.495	10.095	8.078	0	9.7798	45
2	STR	9.8	2	41.495	10.095	8.078	0	9.88384	40
2	STR	9.8	2	41.495	10.095	8.078	0	9.98788	40
2	STR	9.8	2	41.495	10.095	8.078	0	10.0919	40
2	STR	9.8	2	41.495	10.095	8.078	0	10.196	40
2	STR	9.8	2	41.495	10.095	8.078	0	10.3	40
2	STR	10	4	28.532	13.685	10.95	0	0	100
2	STR	10	4	28.532	13.685	10.95	0	0.10404	100
2	STR	10	4	28.532	13.685	10.95	0	0.208081	100
2	STR	10	4	28.532	13.685	10.95	0	0.312121	100
2	STR	10	4	28.532	13.685	10.95	0	0.416162	100
2	STR	10	4	28.532	13.685	10.95	0	0.520202	100
2	STR	10	4	28.532	13.685	10.95	0	0.624242	100
2	STR	10	4	28.532	13.685	10.95	0	0.728283	100
2	STR	10	4	28.532	13.685	10.95	0	0.832323	100
2	STR	10	4	28.532	13.685	10.95	0	0.936364	100
2	STR	10	4	28.532	13.685	10.95	0	1.0404	100
2	STR	10	4	28.532	13.685	10.95	0	1.14444	100
2	STR	10	4	28.532	13.685	10.95	0	1.24848	100
2	STR	10	4	28.532	13.685	10.95	0	1.35253	100
2	STR	10	4	28.532	13.685	10.95	0	1.45657	100
2	STR	10	4	28.532	13.685	10.95	0	1.56061	100
2	STR	10	4	28.532	13.685	10.95	0	1.66465	100
2	STR	10	4	28.532	13.685	10.95	0	1.76869	100
2	STR	10	4	28.532	13.685	10.95	0	1.87273	100
2	STR	10	4	28.532	13.685	10.95	0	1.97677	100
2	STR	10	4	28.532	13.685	10.95	0	2.08081	100
2	STR	10	4	28.532	13.685	10.95	0	2.18485	100
2	STR	10	4	28.532	13.685	10.95	0	2.28889	100
2	STR	10	4	28.532	13.685	10.95	0	2.39293	100
2	STR	10	4	28.532	13.685	10.95	0	2.49697	100
2	STR	10	4	28.532	13.685	10.95	0	2.60101	100
2	STR	10	4	28.532	13.685	10.95	0	2.70505	100
2	STR	10	4	28.532	13.685	10.95	0	2.80909	100
2	STR	10	4	28.532	13.685	10.95	0	2.91313	100
2	STR	10	4	28.532	13.685	10.95	0	3.01717	100
2	STR	10	4	28.532	13.685	10.95	0	3.12121	100
2	STR	10	4	28.532	13.685	10.95	0	3.22525	100
2	STR	10	4	28.532	13.685	10.95	0	3.32929	100
2	STR	10	4	28.532	13.685	10.95	0	3.43333	100
2	STR	10	4	28.532	13.685	10.95	0	3.53737	100
2	STR	10	4	28.532	13.685	10.95	0	3.64141	100
2	STR	10	4	28.532	13.685	10.95	0	3.74545	100
2	STR	10	4	28.532	13.685	10.95	0	3.84949	100
2	STR	10	4	28.532	13.685	10.95	0	3.95354	100
2	STR	10	4	28.532	13.685	10.95	0	4.05758	100
2	STR	10	4	28.532	13.685	10.95	0	4.16162	100
2	STR	10	4	28.532	13.685	10.95	0	4.26566	100
2	STR	10	4	28.532	13.685	10.95	0	4.3697	100
2	STR	10	4	28.532	13.685	10.95	0	4.47374	100
2	STR	10	4	28.532	13.685	10.95	0	4.57778	100
2	STR	10	4	28.532	13.685	10.95	0	4.68182	100
2	STR	10	4	28.532	13.685	10.95	0	4.78586	100
2	STR	10	4	28.532	13.685	10.95	0	4.8899	100
2	STR	10	4	28.532	13.685	10.95	0	4.99394	100
2	STR	10	4	28.532	13.685	10.95	0	5.09798	100
2	STR	10	4	28.532	13.685	10.95	0	5.20202	100
2	STR	10	4	28.532	13.685	10.95	0	5.30606	100
2	STR	10	4	28.532	13.685	10.95	0	5.4101	100
2	STR	10	4	28.532	13.685	10.95	0	5.51414	100
2	STR	10	4	28.532	13.685	10.95	0	5.61818	100
2	STR	10	4	28.532	13.685	10.95	0	5.72222	100
2	STR	10	4	28.532	13.685	10.95	0	5.82626	100
2	STR	10	4	28.532	13.685	10.95	0	5.9303	100
2	STR	10	4	28.532	13.685	10.95	0	6.03434	100
2	STR	10	4	28.532	13.685	10.95	0	6.13838	100
2	STR	10	4	28.532	13.685	10.95	0	6.24242	100
2	STR	10	4	28.532	13.685	10.95	0	6.34646	100
2	STR	10	4	28.532	13.685	10.95	0	6.45051	100
2	STR	10	4	28.532	13.685	10.95	0	6.55455	100
2	STR	10	4	28.532	13.685	10.95	0	6.65859	100
2	STR	10	4	28.532	13.685	10.95	0	6.76263	100
2	STR	10	4	28.532	13.685	10.95	0	6.86667	100
2	STR	10	4	28.532	13.685	10.95	0	6.97071	100
2	STR	10	4	28.532	13.685	10.95	0	7.07475	100
2	STR	10	4	28.532	13.685	10.95	0	7.17879	100
2	STR	10	4	28.532	13.685	10.95	0	7.28283	100
2	STR	10	4	28.532	13.685	10.95	0	7.38687	100
2	STR	10	4	28.532	13.685	10.95	0	7.49091	100
2	STR	10	4	28.532	13.685	10.95	0	7.59495	100
2	STR	10	4	28.532	13.685	10.95	0	7.69899	100
2	STR	10	4	28.532	13.685	10.95	0	7.80303	100
2	STR	10	4	28.532	13.685	10.95	0	7.90707	100
2	STR	10	4	28.532	13.685	10.95	0	8.01111	100
2	STR	10	4	28.532	13.685	10.95	0	8.11515	100
2	STR	10	4	28.532	13.685	10.95	0	8.21919	100
2	STR	10	4	28.532	13.685	10.95	0	8.32323	100
2	STR	10	4	28.532	13.685	10.95	0	8.42727	100
2	STR	10	4	28.532	13.685	10.95	0	8.53131	100
2	STR	10	4	28.532	13.685	10.95	0	8.63535	100
2	STR	10	4	28.532	13.685	10.95	0	8.73939	100
2	STR	10	4	28.532	13.685	10.95	0	8.84343	100
2	STR	10	4	28.532	13.685	10.95	0	8.94747	100
2	STR	10	4	28.532	13.685	10.95	0	9.05152	100
2	STR	10	4	28.532	13.685	10.95	0	9.15556	100
2	STR	10	4	28.532	13.685	10.95	0	9.2596	100
2	STR	10	4	28.532	13.685	10.95	0	9.36364	100
2	STR	10	4	28.532	13.685	10.95	0	9.46768	100
2	STR	10	4	28.532	13.685	10.95	0	9.57172	96
2	STR	10	4	28.532	13.685	10.95	0	9.67576	71
2	STR	10	4	28.532	13.685	10.95	0	9.7798	45
2	STR	10	4	28.532	13.685	10.95	0	9.88384	40
2	STR	10	4	28.532	13.685	10.95	0	9.98788	40
2	STR	10	4	28.532	13.685	10.95	0	10.0919	40
2	STR	10	4	28.532	13.685	10.95	0	10.196	40
2	STR	10	4	28.532	13.685	10.95	0	10.3	40
2	STR	9.7	1	62.483	7.753	6.204	0	0	100
2	STR	9.7	1	62.483	7.753	6.204	0	0.10404	100
2	STR	9.7	1	62.483	7.753	6.204	0	0.208081	100
2	STR	9.7	1	62.483	7.753	6.204	0	0.312121	100
2	STR	9.7	1	62.483	7.753	6.204	0	0.416162	100
2	STR	9.7	1	62.483	7.753	6.204	0	0.520202	100
2	STR	9.7	1	62.483	7.753	6.204	0	0.624242	100
2	STR	9.7	1	62.483	7.753	6.204	0	0.728283	100
2	STR	9.7	1	62.483	7.753	6.204	0	0.832323	100
2	STR	9.7	1	62.483	7.753	6.204	0	0.936364	100
2	STR	9.7	1	62.483	7.753	6.204	0	1.0404	100
2	STR	9.7	1	62.483	7.753	6.204	0	1.14444	100
2	STR	9.7	1	62.483	7.753	6.204	0	1.24848	100
2	STR	9.7	1	62.483	7.753	6.204	0	1.35253	100
2	STR	9.7	1	62.483	7.753	6.204	0	1.45657	100
2	STR	9.7	1	62.483	7.753	6.204	0	1.56061	100
2	STR	9.7	1	62.483	7.753	6.204	0	1.66465	100
2	STR	9.7	1	62.483	7.753	6.204	0	1.76869	100
2	STR	9.7	1	62.483	7.753	6.204	0	1.87273	100
2	STR	9.7	1	62.483	7.753	6.204	0	1.97677	100
2	STR	9.7	1	62.483	7.753	6.204	0	2.08081	100
2	STR	9.7	1	62.483	7.753	6.204	0	2.18485	100
2	STR	9.7	1	62.483	7.753	6.204	0	2.28889	100
2	STR	9.7	1	62.483	7.753	6.204	0	2.39293	100
2	STR	9.7	1	62.483	7.753	6.204	0	2.49697	100
2	STR	9.7	1	62.483	7.753	6.204	0	2.60101	100
2	STR	9.7	1	62.483	7.753	6.204	0	2.70505	100
2	STR	9.7	1	62.483	7.753	6.204	0	2.80909	100
2	STR	9.7	1	62.483	7.753	6.204	0	2.91313	100
2	STR	9.7	1	62.483	7.753	6.204	0	3.01717	100
2	STR	9.7	1	62.483	7.753	6.204	0	3.12121	100
2	STR	9.7	1	62.483	7.753	6.204	0	3.22525	100
2	STR	9.7	1	62.483	7.753	6.204	0	3.32929	100
2	STR	9.7	1	62.483	7.753	6.204	0	3.43333	100
2	STR	9.7	1	62.483	7.753	6.204	0	3.53737	100
2	STR	9.7	1	62.483	7.753	6.204	0	3.64141	100
2	STR	9.7	1	62.483	7.753	6.204	0	3.74545	100
2	STR	9.7	1	62.483	7.753	6.204	0	3.84949	100
2	STR	9.7	1	62.483	7.753	6.204	0	3.95354	100
2	STR	9.7	1	62.483	7.753	6.204	0	4.05758	100
2	STR	9.7	1	62.483	7.753	6.204	0	4.16162	100
2	STR	9.7	1	62.483	7.753	6.204	0	4.26566	100
2	STR	9.7	1	62.483	7.753	6.204	0	4.3697	100
2	STR	9.7	1	62.483	7.753	6.204	0	4.47374	100
2	STR	9.7	1	62.483	7.753	6.204	0	4.57778	100
2	STR	9.7	1	62.483	7.753	6.204	0	4.68182	100
2	STR	9.7	1	62.483	7.753	6.204	0	4.78586	100
2	STR	9.7	1	62.483	7.753	6.204	0	4.8899	100
2	STR	9.7	1	62.483	7.753	6.204	0	4.99394	100
2	STR	9.7	1	62.483	7.753	6.204	0	5.09798	100
2	STR	9.7	1	62.483	7.753	6.204	0	5.20202	100
2	STR	9.7	1	62.483	7.753	6.204	0	5.30606	100
2	STR	9.7	1	62.483	7.753	6.204	0	5.4101	100
2	STR	9.7	1	62.483	7.753	6.204	0	5.51414	100
2	STR	9.7	1	62.483	7.753	6.204	0	5.61818	100
2	STR	9.7	1	62.483	7.753	6.204	0	5.72222	100
2	STR	9.7	1	62.483	7.753	6.204	0	5.82626	100
2	STR	9.7	1	62.483	7.753	6.204	0	5.9303	100
2	STR	9.7	1	62.483	7.753	6.204	0	6.03434	100
2	STR	9.7	1	62.483	7.753	6.204	0	6.13838	100
2	STR	9.7	1	62.483	7.753	6.204	0	6.24242	100
2	STR	9.7	1	62.483	7.753	6.204	0	6.34646	100
2	STR	9.7	1	62.483	7.753	6.204	0	6.45051	100
2	STR	9.7	1	62.483	7.753	6.204	0	6.55455	100
2	STR	9.7	1	62.483	7.753	6.204	0	6.65859	100
2	STR	9.7	1	62.483	7.753	6.204	0	6.76263	100
2	STR	9.7	1	62.483	7.753	6.204	0	6.86667	100
2	STR	9.7	1	62.483	7.753	6.204	0	6.97071	100
2	STR	9.7	1	62.483	7.753	6.204	0	7.07475	100
2	STR	9.7	1	62.483	7.753	6.204	0	7.17879	100
2	STR	9.7	1	62.483	7.753	6.204	0	7.28283	100
2	STR	9.7	1	62.483	7.753	6.204	0	7.38687	100
2	STR	9.7	1	62.483	7.753	6.204	0	7.49091	100
2	STR	9.7	1	62.483	7.753	6.204	0	7.59495	100
2	STR	9.7	1	62.483	7.753	6.204	0	7.69899	100
2	STR	9.7	1	62.483	7.753	6.204	0	7.80303	100
2	STR	9.7	1	62.483	7.753	6.204	0	7.90707	100
2	STR	9.7	1	62.483	7.753	6.204	0	8.01111	100
2	STR	9.7	1	62.483	7.753	6.204	0	8.11515	100
2	STR	9.7	1	62.483	7.753	6.204	0	8.21919	100
2	STR	9.7	1	62.483	7.753	6.204	0	8.32323	100
2	STR	9.7	1	62.483	7.753	6.204	0	8.42727	100
2	STR	9.7	1	62.483	7.753	6.204	0	8.53131	100
2	STR	9.7	1	62.483	7.753	6.204	0	8.63535	100
2	STR	9.7	1	62.483	7.753	6.204	0	8.73939	100
2	STR	9.7	1	62.483	7.753	6.204	0	8.84343	100
2	STR	9.7	1	62.483	7.753	6.204	0	8.94747	100
2	STR	9.7	1	62.483	7.753	6.204	0	9.05152	100
2	STR	9.7	1	62.483	7.753	6.204	0	9.15556	100
2	STR	9.7	1	62.483	7.753	6.204	0	9.2596	100
2	STR	9.7	1	62.483	7.753	6.204	0	9.36364	100
2	STR	9.7	1	62.483	7.753	6.204	0	9.46768	100
2	STR	9.7	1	62.483	7.753	6.204	0	9.57172	96
2	STR	9.7	1	62.483	7.753	6.204	0	9.67576	71
2	STR	9.7	1	62.483	7.753	6.204	0	9.7798	45
2	STR	9.7	1	62.483	7.753	6.204	0	9.88384	40
2	STR	9.7	1	62.483	7.753	6.204	0	9.98788	40
2	STR	9.7	1	62.483	7.753	6.204	0	10.0919	40
2	STR	9.7	1	62.483	7.753	6.204	0	10.196	40
[truncated: 3,801 more rows]
