# Supplementary material for: High potency of sequential therapy with only β-lactam antibiotics
Source: eLife. 2021 Jul 28;10:e68876. doi: 10.7554/eLife.68876 (PMC8456660; doi:10.7554/eLife.68876)
Supplement: Figure 1—source data 1. [file elife-68876-fig1-data1.xlsx]

## Sheet: Fig1_A
	Treatment
Transfer	1	2	3	4	5	6	7	8	9	10	11	12	13	14	15	16
1	A	B	C	0	A	B	C	A	B	C	A	B	C	A	B	C
2	A	B	C	0	B	A	A	A	B	C	B	A	A	A	B	C
3	A	B	C	0	C	C	B	A	B	C	B	C	A	B	A	B
4	A	B	C	0	A	B	C	A	B	C	B	B	B	C	A	A
5	A	B	C	0	B	A	A	B	A	A	A	C	B	C	B	C
6	A	B	C	0	C	C	B	B	A	A	C	B	A	A	C	A
7	A	B	C	0	A	B	C	B	A	A	A	B	B	B	C	A
8	A	B	C	0	B	A	A	B	A	A	B	A	B	A	B	B
9	A	B	C	0	C	C	B	C	C	B	B	C	A	A	B	C
10	A	B	C	0	A	B	C	C	C	B	B	B	B	A	B	A
11	A	B	C	0	B	A	A	C	C	B	B	A	C	B	C	A
12	A	B	C	0	C	C	B	C	C	B	C	B	C	C	B	A
13	A	B	C	0	A	B	C	A	B	C	B	C	C	B	A	C
14	A	B	C	0	B	A	A	A	B	C	C	A	A	A	C	B
15	A	B	C	0	C	C	B	A	B	C	A	A	C	B	B	C
16	A	B	C	0	A	B	C	A	B	C	B	B	B	A	C	B
17	A	B	C	0	B	A	A	B	A	A	B	A	A	A	A	B
18	A	B	C	0	C	C	B	B	A	A	A	B	C	A	C	B
19	A	B	C	0	A	B	C	B	A	A	C	C	B	A	C	C
20	A	B	C	0	B	A	A	B	A	A	B	C	C	B	A	A
21	A	B	C	0	C	C	B	C	C	B	B	B	A	C	C	B
22	A	B	C	0	A	B	C	C	C	B	C	A	C	C	C	B
23	A	B	C	0	B	A	A	C	C	B	C	B	C	B	B	A
24	A	B	C	0	C	C	B	C	C	B	C	A	C	C	C	C
25	A	B	C	0	A	B	C	A	B	C	C	A	B	B	C	A
26	A	B	C	0	B	A	A	A	B	C	C	B	B	C	A	A
27	A	B	C	0	C	C	B	A	B	C	A	A	B	C	B	A
28	A	B	C	0	A	B	C	A	B	C	B	B	A	A	C	C
29	A	B	C	0	B	A	A	B	A	A	A	A	A	A	A	B
30	A	B	C	0	C	C	B	B	A	A	C	C	C	B	B	B
31	A	B	C	0	A	B	C	B	A	A	B	A	C	C	C	A
32	A	B	C	0	B	A	A	B	A	A	A	A	C	A	A	C
33	A	B	C	0	C	C	B	C	C	B	C	C	B	B	A	C
34	A	B	C	0	A	B	C	C	C	B	C	B	C	A	A	A
35	A	B	C	0	B	A	A	C	C	B	A	B	A	B	A	C
36	A	B	C	0	C	C	B	C	C	B	B	C	A	A	C	B
37	A	B	C	0	A	B	C	A	B	C	C	C	C	B	C	C
38	A	B	C	0	B	A	A	A	B	C	A	C	A	C	A	B
39	A	B	C	0	C	C	B	A	B	C	A	B	A	C	C	A
40	A	B	C	0	A	B	C	A	B	C	A	C	A	C	A	C
41	A	B	C	0	B	A	A	B	A	A	C	C	B	A	A	C
42	A	B	C	0	C	C	B	B	A	A	C	C	A	A	C	C
43	A	B	C	0	A	B	C	B	A	A	B	B	B	C	B	A
44	A	B	C	0	B	A	A	B	A	A	B	A	A	C	A	B
45	A	B	C	0	C	C	B	C	C	B	B	C	B	B	C	B
46	A	B	C	0	A	B	C	C	C	B	A	A	A	B	A	A
47	A	B	C	0	B	A	A	C	C	B	A	C	C	C	B	A
48	A	B	C	0	C	C	B	C	C	B	A	C	A	B	C	B
49	A	B	C	0	A	B	C	A	B	C	C	C	B	C	B	C
50	A	B	C	0	B	A	A	A	B	C	A	B	C	B	B	B
51	A	B	C	0	C	C	B	A	B	C	C	B	C	B	C	C
52	A	B	C	0	A	B	C	A	B	C	A	A	A	C	B	B
53	A	B	C	0	B	A	A	B	A	A	A	C	C	A	C	A
54	A	B	C	0	C	C	B	B	A	A	A	A	B	A	B	B
55	A	B	C	0	A	B	C	B	A	A	C	A	A	A	B	C
56	A	B	C	0	B	A	A	B	A	A	B	B	A	B	B	B
57	A	B	C	0	C	C	B	C	C	B	B	C	B	C	A	A
58	A	B	C	0	A	B	C	C	C	B	A	A	C	B	A	A
59	A	B	C	0	B	A	A	C	C	B	B	B	B	A	C	C
60	A	B	C	0	C	C	B	C	C	B	C	C	C	B	B	B
61	A	B	C	0	A	B	C	A	B	C	B	A	B	A	A	A
62	A	B	C	0	B	A	A	A	B	C	C	B	B	A	C	C
63	A	B	C	0	C	C	B	A	B	C	C	C	C	C	C	A
64	A	B	C	0	A	B	C	A	B	C	C	C	C	C	A	A
65	A	B	C	0	B	A	A	B	A	A	B	C	C	B	B	A
66	A	B	C	0	C	C	B	B	A	A	A	B	B	A	A	C
67	A	B	C	0	A	B	C	B	A	A	C	B	A	A	C	B
68	A	B	C	0	B	A	A	B	A	A	B	C	C	A	C	C
69	A	B	C	0	C	C	B	C	C	B	A	A	C	B	C	A
70	A	B	C	0	A	B	C	C	C	B	C	A	A	B	B	B
71	A	B	C	0	B	A	A	C	C	B	B	C	A	C	B	B
72	A	B	C	0	C	C	B	C	C	B	A	A	B	B	A	C
73	A	B	C	0	A	B	C	A	B	C	A	A	C	B	A	C
74	A	B	C	0	B	A	A	A	B	C	C	A	B	C	B	C
75	A	B	C	0	C	C	B	A	B	C	B	C	C	A	A	A
76	A	B	C	0	A	B	C	A	B	C	A	B	B	B	B	B
77	A	B	C	0	B	A	A	B	A	A	C	C	A	C	C	C
78	A	B	C	0	C	C	B	B	A	A	A	B	B	C	A	B
79	A	B	C	0	A	B	C	B	A	A	C	A	C	C	B	C
80	A	B	C	0	B	A	A	B	A	A	B	B	B	C	B	A
81	A	B	C	0	C	C	B	C	C	B	C	A	C	B	A	B
82	A	B	C	0	A	B	C	C	C	B	A	A	A	B	A	A
83	A	B	C	0	B	A	A	C	C	B	A	C	A	A	A	B
84	A	B	C	0	C	C	B	C	C	B	A	A	B	A	B	C
85	A	B	C	0	A	B	C	A	B	C	A	B	A	C	B	C
86	A	B	C	0	B	A	A	A	B	C	B	B	B	B	C	C
87	A	B	C	0	C	C	B	A	B	C	A	C	B	C	A	B
88	A	B	C	0	A	B	C	A	B	C	C	A	C	B	A	A
89	A	B	C	0	B	A	A	B	A	A	B	A	C	C	C	C
90	A	B	C	0	C	C	B	B	A	A	B	C	A	A	B	B
91	A	B	C	0	A	B	C	B	A	A	C	B	A	C	C	A
92	A	B	C	0	B	A	A	B	A	A	C	C	B	B	A	A
93	A	B	C	0	C	C	B	C	C	B	A	B	B	B	B	B
94	A	B	C	0	A	B	C	C	C	B	C	B	B	C	A	A
95	A	B	C	0	B	A	A	C	C	B	B	B	A	A	C	B
96	A	B	C	0	C	C	B	C	C	B	B	A	A	C	B	B

## Sheet: Fig1_B_D
Study	Experiment	Drug_A	Drug_B	Drug_C	Extinction	Fraction
Roemhild et al. 2018 PNAS	Exp. 1	CIP	GEN	CAR	27/180	0.15
this study	Exp. 2	CIP	STR	DOR	0/180	0
this study	Exp. 3	CAR	DOR	CEF	49/180	0.272222
this study	Exp. 4	TIC	AZL	CTZ	24/180	0.133333

## Sheet: Fig1_C
Experiment	Drug	Antibiotic	Transfer	Treatment_group	Treatment	Culture	Lineage	Extinction	auc_bg	auc_rel	auc_in	end_od_bg	rgr	log_rgr	Well	Plate	Reader
Exp. 3	A	CAR	1	mono	1	a2	3a_1	0	0.573	0.353922	64.6078	0.059	0.256522	-1.36054	C1	2	14031212
Exp. 3	A	CAR	1	mono	1	b2	3a_2	0	0.57	0.352069	64.7931	0.062	0.269565	-1.31094	C2	2	14031212
Exp. 3	A	CAR	1	mono	1	c2	3a_3	0	0.764	0.471896	52.8104	0.089	0.386957	-0.949443	C3	2	14031212
Exp. 3	A	CAR	1	mono	1	d2	3a_4	0	0.542	0.334775	66.5225	0.061	0.265217	-1.32721	C4	2	14031212
Exp. 3	A	CAR	1	mono	1	e2	3a_5	0	0.622	0.384188	61.5812	0.068	0.295652	-1.21857	C5	2	14031212
Exp. 3	A	CAR	1	mono	1	f2	3a_6	0	0.595	0.367511	63.2489	0.062	0.269565	-1.31094	C6	2	14031212
Exp. 3	A	CAR	1	mono	1	a2	3b_1	0	0.573	0.353922	64.6078	0.059	0.256522	-1.36054	C1	2	14031212
Exp. 3	A	CAR	1	mono	1	b2	3b_2	0	0.57	0.352069	64.7931	0.062	0.269565	-1.31094	C2	2	14031212
Exp. 3	A	CAR	1	mono	1	c2	3b_3	0	0.764	0.471896	52.8104	0.089	0.386957	-0.949443	C3	2	14031212
Exp. 3	A	CAR	1	mono	1	d2	3b_4	0	0.542	0.334775	66.5225	0.061	0.265217	-1.32721	C4	2	14031212
Exp. 3	A	CAR	1	mono	1	e2	3b_5	0	0.622	0.384188	61.5812	0.068	0.295652	-1.21857	C5	2	14031212
Exp. 3	A	CAR	1	mono	1	f2	3b_6	0	0.595	0.367511	63.2489	0.062	0.269565	-1.31094	C6	2	14031212
Exp. 3	B	DOR	1	mono	2	d2	3a_10	0	0.63	0.399746	60.0254	0.059	0.25431	-1.3692	E7	2	14031212
Exp. 3	B	DOR	1	mono	2	e2	3a_11	0	0.667	0.423223	57.6777	0.061	0.262931	-1.33586	E8	2	14031212
Exp. 3	B	DOR	1	mono	2	f2	3a_12	0	0.615	0.390228	60.9772	0.06	0.258621	-1.35239	E9	2	14031212
Exp. 3	B	DOR	1	mono	2	a2	3a_7	0	0.532	0.337563	66.2437	0.048	0.206897	-1.57554	E10	2	14031212
Exp. 3	B	DOR	1	mono	2	b2	3a_8	0	0.484	0.307107	69.2893	0.046	0.198276	-1.6181	E11	2	14031212
Exp. 3	B	DOR	1	mono	2	c2	3a_9	0	0.605	0.383883	61.6117	0.052	0.224138	-1.49549	E12	2	14031212
Exp. 3	B	DOR	1	mono	2	d2	3b_10	0	0.63	0.399746	60.0254	0.059	0.25431	-1.3692	E7	2	14031212
Exp. 3	B	DOR	1	mono	2	e2	3b_11	0	0.667	0.423223	57.6777	0.061	0.262931	-1.33586	E8	2	14031212
Exp. 3	B	DOR	1	mono	2	f2	3b_12	0	0.615	0.390228	60.9772	0.06	0.258621	-1.35239	E9	2	14031212
Exp. 3	B	DOR	1	mono	2	a2	3b_7	0	0.532	0.337563	66.2437	0.048	0.206897	-1.57554	E10	2	14031212
Exp. 3	B	DOR	1	mono	2	b2	3b_8	0	0.484	0.307107	69.2893	0.046	0.198276	-1.6181	E11	2	14031212
Exp. 3	B	DOR	1	mono	2	c2	3b_9	0	0.605	0.383883	61.6117	0.052	0.224138	-1.49549	E12	2	14031212
Exp. 3	C	CEF	1	mono	3	a2	3a_13	0	0.488	0.309645	69.0355	0.049	0.211207	-1.55492	D1	3	1403101
Exp. 3	C	CEF	1	mono	3	b2	3a_14	0	0.648	0.411168	58.8832	0.078	0.336207	-1.09003	D2	3	1403101
Exp. 3	C	CEF	1	mono	3	c2	3a_15	0	0.738	0.468274	53.1726	0.084	0.362069	-1.01592	D3	3	1403101
Exp. 3	C	CEF	1	mono	3	d2	3a_16	0	0.532	0.337563	66.2437	0.05	0.215517	-1.53471	D4	3	1403101
Exp. 3	C	CEF	1	mono	3	e2	3a_17	0	0.572	0.362944	63.7056	0.058	0.25	-1.38629	D5	3	1403101
Exp. 3	C	CEF	1	mono	3	f2	3a_18	0	0.533	0.338198	66.1802	0.053	0.228448	-1.47645	D6	3	1403101
Exp. 3	C	CEF	1	mono	3	a2	3b_13	0	0.488	0.309645	69.0355	0.049	0.211207	-1.55492	D1	3	1403101
Exp. 3	C	CEF	1	mono	3	b2	3b_14	0	0.648	0.411168	58.8832	0.078	0.336207	-1.09003	D2	3	1403101
Exp. 3	C	CEF	1	mono	3	c2	3b_15	0	0.738	0.468274	53.1726	0.084	0.362069	-1.01592	D3	3	1403101
Exp. 3	C	CEF	1	mono	3	d2	3b_16	0	0.532	0.337563	66.2437	0.05	0.215517	-1.53471	D4	3	1403101
Exp. 3	C	CEF	1	mono	3	e2	3b_17	0	0.572	0.362944	63.7056	0.058	0.25	-1.38629	D5	3	1403101
Exp. 3	C	CEF	1	mono	3	f2	3b_18	0	0.533	0.338198	66.1802	0.053	0.228448	-1.47645	D6	3	1403101
Exp. 3	A	CAR	1	mono	5	a2	3a_24	0	0.573	0.353922	64.6078	0.059	0.256522	-1.36054	C1	2	14031212
Exp. 3	A	CAR	1	mono	5	b2	3a_25	0	0.57	0.352069	64.7931	0.062	0.269565	-1.31094	C2	2	14031212
Exp. 3	A	CAR	1	mono	5	c2	3a_26	0	0.764	0.471896	52.8104	0.089	0.386957	-0.949443	C3	2	14031212
Exp. 3	A	CAR	1	mono	5	d2	3a_27	0	0.542	0.334775	66.5225	0.061	0.265217	-1.32721	C4	2	14031212
Exp. 3	A	CAR	1	mono	5	e2	3a_28	0	0.622	0.384188	61.5812	0.068	0.295652	-1.21857	C5	2	14031212
Exp. 3	A	CAR	1	mono	5	f2	3a_29	0	0.595	0.367511	63.2489	0.062	0.269565	-1.31094	C6	2	14031212
Exp. 3	A	CAR	1	mono	5	a2	3b_24	0	0.573	0.353922	64.6078	0.059	0.256522	-1.36054	C1	2	14031212
Exp. 3	A	CAR	1	mono	5	b2	3b_25	0	0.57	0.352069	64.7931	0.062	0.269565	-1.31094	C2	2	14031212
Exp. 3	A	CAR	1	mono	5	c2	3b_26	0	0.764	0.471896	52.8104	0.089	0.386957	-0.949443	C3	2	14031212
Exp. 3	A	CAR	1	mono	5	d2	3b_27	0	0.542	0.334775	66.5225	0.061	0.265217	-1.32721	C4	2	14031212
Exp. 3	A	CAR	1	mono	5	e2	3b_28	0	0.622	0.384188	61.5812	0.068	0.295652	-1.21857	C5	2	14031212
Exp. 3	A	CAR	1	mono	5	f2	3b_29	0	0.595	0.367511	63.2489	0.062	0.269565	-1.31094	C6	2	14031212
Exp. 3	B	DOR	1	mono	6	a2	3a_30	0	0.532	0.337563	66.2437	0.048	0.206897	-1.57554	E10	2	14031212
Exp. 3	B	DOR	1	mono	6	b2	3a_31	0	0.484	0.307107	69.2893	0.046	0.198276	-1.6181	E11	2	14031212
Exp. 3	B	DOR	1	mono	6	c2	3a_32	0	0.605	0.383883	61.6117	0.052	0.224138	-1.49549	E12	2	14031212
Exp. 3	B	DOR	1	mono	6	d2	3a_33	0	0.63	0.399746	60.0254	0.059	0.25431	-1.3692	E7	2	14031212
Exp. 3	B	DOR	1	mono	6	e2	3a_34	0	0.667	0.423223	57.6777	0.061	0.262931	-1.33586	E8	2	14031212
Exp. 3	B	DOR	1	mono	6	f2	3a_35	0	0.615	0.390228	60.9772	0.06	0.258621	-1.35239	E9	2	14031212
Exp. 3	B	DOR	1	mono	6	a2	3b_30	0	0.532	0.337563	66.2437	0.048	0.206897	-1.57554	E10	2	14031212
Exp. 3	B	DOR	1	mono	6	b2	3b_31	0	0.484	0.307107	69.2893	0.046	0.198276	-1.6181	E11	2	14031212
Exp. 3	B	DOR	1	mono	6	c2	3b_32	0	0.605	0.383883	61.6117	0.052	0.224138	-1.49549	E12	2	14031212
Exp. 3	B	DOR	1	mono	6	d2	3b_33	0	0.63	0.399746	60.0254	0.059	0.25431	-1.3692	E7	2	14031212
Exp. 3	B	DOR	1	mono	6	e2	3b_34	0	0.667	0.423223	57.6777	0.061	0.262931	-1.33586	E8	2	14031212
Exp. 3	B	DOR	1	mono	6	f2	3b_35	0	0.615	0.390228	60.9772	0.06	0.258621	-1.35239	E9	2	14031212
Exp. 3	C	CEF	1	mono	7	a2	3a_36	0	0.488	0.309645	69.0355	0.049	0.211207	-1.55492	D1	3	1403101
Exp. 3	C	CEF	1	mono	7	b2	3a_37	0	0.648	0.411168	58.8832	0.078	0.336207	-1.09003	D2	3	1403101
Exp. 3	C	CEF	1	mono	7	c2	3a_38	0	0.738	0.468274	53.1726	0.084	0.362069	-1.01592	D3	3	1403101
Exp. 3	C	CEF	1	mono	7	d2	3a_39	0	0.532	0.337563	66.2437	0.05	0.215517	-1.53471	D4	3	1403101
Exp. 3	C	CEF	1	mono	7	e2	3a_40	0	0.572	0.362944	63.7056	0.058	0.25	-1.38629	D5	3	1403101
Exp. 3	C	CEF	1	mono	7	f2	3a_41	0	0.533	0.338198	66.1802	0.053	0.228448	-1.47645	D6	3	1403101
Exp. 3	C	CEF	1	mono	7	a2	3b_36	0	0.488	0.309645	69.0355	0.049	0.211207	-1.55492	D1	3	1403101
Exp. 3	C	CEF	1	mono	7	b2	3b_37	0	0.648	0.411168	58.8832	0.078	0.336207	-1.09003	D2	3	1403101
Exp. 3	C	CEF	1	mono	7	c2	3b_38	0	0.738	0.468274	53.1726	0.084	0.362069	-1.01592	D3	3	1403101
Exp. 3	C	CEF	1	mono	7	d2	3b_39	0	0.532	0.337563	66.2437	0.05	0.215517	-1.53471	D4	3	1403101
Exp. 3	C	CEF	1	mono	7	e2	3b_40	0	0.572	0.362944	63.7056	0.058	0.25	-1.38629	D5	3	1403101
Exp. 3	C	CEF	1	mono	7	f2	3b_41	0	0.533	0.338198	66.1802	0.053	0.228448	-1.47645	D6	3	1403101
Exp. 3	A	CAR	1	mono	8	a2	3a_42	0	0.573	0.353922	64.6078	0.059	0.256522	-1.36054	C1	2	14031212
Exp. 3	A	CAR	1	mono	8	b2	3a_43	0	0.57	0.352069	64.7931	0.062	0.269565	-1.31094	C2	2	14031212
Exp. 3	A	CAR	1	mono	8	c2	3a_44	0	0.764	0.471896	52.8104	0.089	0.386957	-0.949443	C3	2	14031212
Exp. 3	A	CAR	1	mono	8	d2	3a_45	0	0.542	0.334775	66.5225	0.061	0.265217	-1.32721	C4	2	14031212
Exp. 3	A	CAR	1	mono	8	e2	3a_46	0	0.622	0.384188	61.5812	0.068	0.295652	-1.21857	C5	2	14031212
Exp. 3	A	CAR	1	mono	8	f2	3a_47	0	0.595	0.367511	63.2489	0.062	0.269565	-1.31094	C6	2	14031212
Exp. 3	A	CAR	1	mono	8	a2	3b_42	0	0.573	0.353922	64.6078	0.059	0.256522	-1.36054	C1	2	14031212
Exp. 3	A	CAR	1	mono	8	b2	3b_43	0	0.57	0.352069	64.7931	0.062	0.269565	-1.31094	C2	2	14031212
Exp. 3	A	CAR	1	mono	8	c2	3b_44	0	0.764	0.471896	52.8104	0.089	0.386957	-0.949443	C3	2	14031212
Exp. 3	A	CAR	1	mono	8	d2	3b_45	0	0.542	0.334775	66.5225	0.061	0.265217	-1.32721	C4	2	14031212
Exp. 3	A	CAR	1	mono	8	e2	3b_46	0	0.622	0.384188	61.5812	0.068	0.295652	-1.21857	C5	2	14031212
Exp. 3	B	DOR	1	mono	9	a2	3a_48	0	0.532	0.337563	66.2437	0.048	0.206897	-1.57554	E10	2	14031212
Exp. 3	B	DOR	1	mono	9	b2	3a_49	0	0.484	0.307107	69.2893	0.046	0.198276	-1.6181	E11	2	14031212
Exp. 3	B	DOR	1	mono	9	c2	3a_50	0	0.605	0.383883	61.6117	0.052	0.224138	-1.49549	E12	2	14031212
Exp. 3	B	DOR	1	mono	9	d2	3a_51	0	0.63	0.399746	60.0254	0.059	0.25431	-1.3692	E7	2	14031212
Exp. 3	B	DOR	1	mono	9	e2	3a_52	0	0.667	0.423223	57.6777	0.061	0.262931	-1.33586	E8	2	14031212
Exp. 3	B	DOR	1	mono	9	f2	3a_53	0	0.615	0.390228	60.9772	0.06	0.258621	-1.35239	E9	2	14031212
Exp. 3	B	DOR	1	mono	9	a2	3b_48	0	0.532	0.337563	66.2437	0.048	0.206897	-1.57554	E10	2	14031212
Exp. 3	B	DOR	1	mono	9	b2	3b_49	0	0.484	0.307107	69.2893	0.046	0.198276	-1.6181	E11	2	14031212
Exp. 3	B	DOR	1	mono	9	c2	3b_50	0	0.605	0.383883	61.6117	0.052	0.224138	-1.49549	E12	2	14031212
Exp. 3	B	DOR	1	mono	9	d2	3b_51	0	0.63	0.399746	60.0254	0.059	0.25431	-1.3692	E7	2	14031212
Exp. 3	B	DOR	1	mono	9	e2	3b_52	0	0.667	0.423223	57.6777	0.061	0.262931	-1.33586	E8	2	14031212
Exp. 3	B	DOR	1	mono	9	f2	3b_53	0	0.615	0.390228	60.9772	0.06	0.258621	-1.35239	E9	2	14031212
Exp. 3	C	CEF	1	mono	10	a2	3a_54	0	0.488	0.309645	69.0355	0.049	0.211207	-1.55492	D1	3	1403101
Exp. 3	C	CEF	1	mono	10	b2	3a_55	0	0.648	0.411168	58.8832	0.078	0.336207	-1.09003	D2	3	1403101
Exp. 3	C	CEF	1	mono	10	c2	3a_56	0	0.738	0.468274	53.1726	0.084	0.362069	-1.01592	D3	3	1403101
Exp. 3	C	CEF	1	mono	10	d2	3a_57	0	0.532	0.337563	66.2437	0.05	0.215517	-1.53471	D4	3	1403101
Exp. 3	C	CEF	1	mono	10	e2	3a_58	0	0.572	0.362944	63.7056	0.058	0.25	-1.38629	D5	3	1403101
Exp. 3	C	CEF	1	mono	10	f2	3a_59	0	0.533	0.338198	66.1802	0.053	0.228448	-1.47645	D6	3	1403101
Exp. 3	C	CEF	1	mono	10	a2	3b_54	0	0.488	0.309645	69.0355	0.049	0.211207	-1.55492	D1	3	1403101
Exp. 3	C	CEF	1	mono	10	b2	3b_55	0	0.648	0.411168	58.8832	0.078	0.336207	-1.09003	D2	3	1403101
Exp. 3	C	CEF	1	mono	10	c2	3b_56	0	0.738	0.468274	53.1726	0.084	0.362069	-1.01592	D3	3	1403101
Exp. 3	C	CEF	1	mono	10	d2	3b_57	0	0.532	0.337563	66.2437	0.05	0.215517	-1.53471	D4	3	1403101
Exp. 3	A	CAR	1	mono	11	a2	3a_60	0	0.573	0.353922	64.6078	0.059	0.256522	-1.36054	C1	2	14031212
Exp. 3	A	CAR	1	mono	11	b2	3a_61	0	0.57	0.352069	64.7931	0.062	0.269565	-1.31094	C2	2	14031212
Exp. 3	A	CAR	1	mono	11	c2	3a_62	0	0.764	0.471896	52.8104	0.089	0.386957	-0.949443	C3	2	14031212
Exp. 3	A	CAR	1	mono	11	d2	3a_63	0	0.542	0.334775	66.5225	0.061	0.265217	-1.32721	C4	2	14031212
Exp. 3	A	CAR	1	mono	11	e2	3a_64	0	0.622	0.384188	61.5812	0.068	0.295652	-1.21857	C5	2	14031212
Exp. 3	A	CAR	1	mono	11	f2	3a_65	0	0.595	0.367511	63.2489	0.062	0.269565	-1.31094	C6	2	14031212
Exp. 3	A	CAR	1	mono	11	a2	3b_60	0	0.573	0.353922	64.6078	0.059	0.256522	-1.36054	C1	2	14031212
Exp. 3	A	CAR	1	mono	11	b2	3b_61	0	0.57	0.352069	64.7931	0.062	0.269565	-1.31094	C2	2	14031212
Exp. 3	A	CAR	1	mono	11	c2	3b_62	0	0.764	0.471896	52.8104	0.089	0.386957	-0.949443	C3	2	14031212
Exp. 3	A	CAR	1	mono	11	d2	3b_63	0	0.542	0.334775	66.5225	0.061	0.265217	-1.32721	C4	2	14031212
Exp. 3	A	CAR	1	mono	11	e2	3b_64	0	0.622	0.384188	61.5812	0.068	0.295652	-1.21857	C5	2	14031212
Exp. 3	A	CAR	1	mono	11	f2	3b_65	0	0.595	0.367511	63.2489	0.062	0.269565	-1.31094	C6	2	14031212
Exp. 3	B	DOR	1	mono	12	a2	3a_66	0	0.532	0.337563	66.2437	0.048	0.206897	-1.57554	E10	2	14031212
Exp. 3	B	DOR	1	mono	12	b2	3a_67	0	0.484	0.307107	69.2893	0.046	0.198276	-1.6181	E11	2	14031212
Exp. 3	B	DOR	1	mono	12	c2	3a_68	0	0.605	0.383883	61.6117	0.052	0.224138	-1.49549	E12	2	14031212
Exp. 3	B	DOR	1	mono	12	d2	3a_69	0	0.63	0.399746	60.0254	0.059	0.25431	-1.3692	E7	2	14031212
Exp. 3	B	DOR	1	mono	12	e2	3a_70	0	0.667	0.423223	57.6777	0.061	0.262931	-1.33586	E8	2	14031212
Exp. 3	B	DOR	1	mono	12	f2	3a_71	0	0.615	0.390228	60.9772	0.06	0.258621	-1.35239	E9	2	14031212
Exp. 3	B	DOR	1	mono	12	a2	3b_66	0	0.532	0.337563	66.2437	0.048	0.206897	-1.57554	E10	2	14031212
Exp. 3	B	DOR	1	mono	12	b2	3b_67	0	0.484	0.307107	69.2893	0.046	0.198276	-1.6181	E11	2	14031212
Exp. 3	B	DOR	1	mono	12	c2	3b_68	0	0.605	0.383883	61.6117	0.052	0.224138	-1.49549	E12	2	14031212
Exp. 3	B	DOR	1	mono	12	d2	3b_69	0	0.63	0.399746	60.0254	0.059	0.25431	-1.3692	E7	2	14031212
Exp. 3	B	DOR	1	mono	12	e2	3b_70	0	0.667	0.423223	57.6777	0.061	0.262931	-1.33586	E8	2	14031212
Exp. 3	B	DOR	1	mono	12	f2	3b_71	0	0.615	0.390228	60.9772	0.06	0.258621	-1.35239	E9	2	14031212
Exp. 3	C	CEF	1	mono	13	a2	3a_72	0	0.488	0.309645	69.0355	0.049	0.211207	-1.55492	D1	3	1403101
Exp. 3	C	CEF	1	mono	13	b2	3a_73	0	0.648	0.411168	58.8832	0.078	0.336207	-1.09003	D2	3	1403101
Exp. 3	C	CEF	1	mono	13	c2	3a_74	0	0.738	0.468274	53.1726	0.084	0.362069	-1.01592	D3	3	1403101
Exp. 3	C	CEF	1	mono	13	d2	3a_75	0	0.532	0.337563	66.2437	0.05	0.215517	-1.53471	D4	3	1403101
Exp. 3	C	CEF	1	mono	13	e2	3a_76	0	0.572	0.362944	63.7056	0.058	0.25	-1.38629	D5	3	1403101
Exp. 3	C	CEF	1	mono	13	f2	3a_77	0	0.533	0.338198	66.1802	0.053	0.228448	-1.47645	D6	3	1403101
Exp. 3	C	CEF	1	mono	13	a2	3b_72	0	0.488	0.309645	69.0355	0.049	0.211207	-1.55492	D1	3	1403101
Exp. 3	C	CEF	1	mono	13	b2	3b_73	0	0.648	0.411168	58.8832	0.078	0.336207	-1.09003	D2	3	1403101
Exp. 3	C	CEF	1	mono	13	c2	3b_74	0	0.738	0.468274	53.1726	0.084	0.362069	-1.01592	D3	3	1403101
Exp. 3	C	CEF	1	mono	13	d2	3b_75	0	0.532	0.337563	66.2437	0.05	0.215517	-1.53471	D4	3	1403101
Exp. 3	C	CEF	1	mono	13	e2	3b_76	0	0.572	0.362944	63.7056	0.058	0.25	-1.38629	D5	3	1403101
Exp. 3	C	CEF	1	mono	13	f2	3b_77	0	0.533	0.338198	66.1802	0.053	0.228448	-1.47645	D6	3	1403101
Exp. 3	A	CAR	1	mono	14	a2	3a_78	0	0.573	0.353922	64.6078	0.059	0.256522	-1.36054	C1	2	14031212
Exp. 3	A	CAR	1	mono	14	b2	3a_79	0	0.57	0.352069	64.7931	0.062	0.269565	-1.31094	C2	2	14031212
Exp. 3	A	CAR	1	mono	14	c2	3a_80	0	0.764	0.471896	52.8104	0.089	0.386957	-0.949443	C3	2	14031212
Exp. 3	A	CAR	1	mono	14	d2	3a_81	0	0.542	0.334775	66.5225	0.061	0.265217	-1.32721	C4	2	14031212
Exp. 3	A	CAR	1	mono	14	e2	3a_82	0	0.622	0.384188	61.5812	0.068	0.295652	-1.21857	C5	2	14031212
Exp. 3	A	CAR	1	mono	14	f2	3a_83	0	0.595	0.367511	63.2489	0.062	0.269565	-1.31094	C6	2	14031212
Exp. 3	A	CAR	1	mono	14	a2	3b_78	0	0.573	0.353922	64.6078	0.059	0.256522	-1.36054	C1	2	14031212
Exp. 3	A	CAR	1	mono	14	b2	3b_79	0	0.57	0.352069	64.7931	0.062	0.269565	-1.31094	C2	2	14031212
Exp. 3	A	CAR	1	mono	14	c2	3b_80	0	0.764	0.471896	52.8104	0.089	0.386957	-0.949443	C3	2	14031212
Exp. 3	A	CAR	1	mono	14	d2	3b_81	0	0.542	0.334775	66.5225	0.061	0.265217	-1.32721	C4	2	14031212
Exp. 3	A	CAR	1	mono	14	e2	3b_82	0	0.622	0.384188	61.5812	0.068	0.295652	-1.21857	C5	2	14031212
Exp. 3	A	CAR	1	mono	14	f2	3b_83	0	0.595	0.367511	63.2489	0.062	0.269565	-1.31094	C6	2	14031212
Exp. 3	B	DOR	1	mono	15	a2	3a_84	0	0.532	0.337563	66.2437	0.048	0.206897	-1.57554	E10	2	14031212
Exp. 3	B	DOR	1	mono	15	b2	3a_85	0	0.484	0.307107	69.2893	0.046	0.198276	-1.6181	E11	2	14031212
Exp. 3	B	DOR	1	mono	15	c2	3a_86	0	0.605	0.383883	61.6117	0.052	0.224138	-1.49549	E12	2	14031212
Exp. 3	B	DOR	1	mono	15	d2	3a_87	0	0.63	0.399746	60.0254	0.059	0.25431	-1.3692	E7	2	14031212
Exp. 3	B	DOR	1	mono	15	e2	3a_88	0	0.667	0.423223	57.6777	0.061	0.262931	-1.33586	E8	2	14031212
Exp. 3	B	DOR	1	mono	15	f2	3a_89	0	0.615	0.390228	60.9772	0.06	0.258621	-1.35239	E9	2	14031212
Exp. 3	B	DOR	1	mono	15	a2	3b_84	0	0.532	0.337563	66.2437	0.048	0.206897	-1.57554	E10	2	14031212
Exp. 3	B	DOR	1	mono	15	b2	3b_85	0	0.484	0.307107	69.2893	0.046	0.198276	-1.6181	E11	2	14031212
Exp. 3	B	DOR	1	mono	15	c2	3b_86	0	0.605	0.383883	61.6117	0.052	0.224138	-1.49549	E12	2	14031212
Exp. 3	B	DOR	1	mono	15	d2	3b_87	0	0.63	0.399746	60.0254	0.059	0.25431	-1.3692	E7	2	14031212
Exp. 3	B	DOR	1	mono	15	e2	3b_88	0	0.667	0.423223	57.6777	0.061	0.262931	-1.33586	E8	2	14031212
Exp. 3	B	DOR	1	mono	15	f2	3b_89	0	0.615	0.390228	60.9772	0.06	0.258621	-1.35239	E9	2	14031212
Exp. 3	C	CEF	1	mono	16	a2	3a_90	0	0.488	0.309645	69.0355	0.049	0.211207	-1.55492	D1	3	1403101
Exp. 3	C	CEF	1	mono	16	b2	3a_91	0	0.648	0.411168	58.8832	0.078	0.336207	-1.09003	D2	3	1403101
Exp. 3	C	CEF	1	mono	16	c2	3a_92	0	0.738	0.468274	53.1726	0.084	0.362069	-1.01592	D3	3	1403101
Exp. 3	C	CEF	1	mono	16	d2	3a_93	0	0.532	0.337563	66.2437	0.05	0.215517	-1.53471	D4	3	1403101
Exp. 3	C	CEF	1	mono	16	e2	3a_94	0	0.572	0.362944	63.7056	0.058	0.25	-1.38629	D5	3	1403101
Exp. 3	C	CEF	1	mono	16	f2	3a_95	0	0.533	0.338198	66.1802	0.053	0.228448	-1.47645	D6	3	1403101
Exp. 3	C	CEF	1	mono	16	a2	3b_90	0	0.488	0.309645	69.0355	0.049	0.211207	-1.55492	D1	3	1403101
Exp. 3	C	CEF	1	mono	16	b2	3b_91	0	0.648	0.411168	58.8832	0.078	0.336207	-1.09003	D2	3	1403101
Exp. 3	C	CEF	1	mono	16	c2	3b_92	0	0.738	0.468274	53.1726	0.084	0.362069	-1.01592	D3	3	1403101
Exp. 3	C	CEF	1	mono	16	d2	3b_93	0	0.532	0.337563	66.2437	0.05	0.215517	-1.53471	D4	3	1403101
Exp. 3	C	CEF	1	mono	16	e2	3b_94	0	0.572	0.362944	63.7056	0.058	0.25	-1.38629	D5	3	1403101
Exp. 3	C	CEF	1	mono	16	f2	3b_95	0	0.533	0.338198	66.1802	0.053	0.228448	-1.47645	D6	3	1403101
Exp. 3	A	CAR	2	mono	1	a2	3a_1	0	-0.019	-0.012	101.2	0.105	0.357	-1.03	G7	3a	14031212
Exp. 3	A	CAR	2	mono	1	b2	3a_2	0	-0.092	-0.057	105.7	0.07	0.238	-1.435	G8	3a	14031212
Exp. 3	A	CAR	2	mono	1	c2	3a_3	0	-0.014	-0.009	100.9	0.085	0.289	-1.241	G9	3a	14031212
Exp. 3	A	CAR	2	mono	1	d2	3a_4	0	0.009	0.006	99.4	0.144	0.49	-0.713	G10	3a	14031212
Exp. 3	A	CAR	2	mono	1	e2	3a_5	1	-0.053	-0.033	103.3	0.08	0.272	-1.302	G11	3a	14031212
Exp. 3	A	CAR	2	mono	1	f2	3a_6	0	0.02	0.012	98.8	0.092	0.313	-1.162	G12	3a	14031212
Exp. 3	A	CAR	2	mono	1	a2	3b_1	0	0.021	0.012	98.8	0.101	0.331	-1.106	G7	3b	1403101
Exp. 3	A	CAR	2	mono	1	b2	3b_2	0	-0.183	-0.107	110.7	0.058	0.19	-1.661	G8	3b	1403101
Exp. 3	A	CAR	2	mono	1	c2	3b_3	0	-0.034	-0.02	102	0.075	0.246	-1.402	G9	3b	1403101
Exp. 3	A	CAR	2	mono	1	d2	3b_4	0	0.14	0.082	91.8	0.15	0.492	-0.709	G10	3b	1403101
Exp. 3	A	CAR	2	mono	1	e2	3b_5	0	0.038	0.022	97.8	0.096	0.315	-1.155	G11	3b	1403101
Exp. 3	A	CAR	2	mono	1	f2	3b_6	0	0.029	0.017	98.3	0.087	0.285	-1.255	G12	3b	1403101
Exp. 3	B	DOR	2	mono	2	d2	3a_10	0	-0.003	-0.002	100.2	0.078	0.265	-1.328	B4	3a	14031212
Exp. 3	B	DOR	2	mono	2	e2	3a_11	0	0.063	0.039	96.1	0.149	0.507	-0.679	B5	3a	14031212
Exp. 3	B	DOR	2	mono	2	f2	3a_12	0	0.066	0.041	95.9	0.13	0.442	-0.816	B6	3a	14031212
Exp. 3	B	DOR	2	mono	2	a2	3a_7	0	-0.002	-0.001	100.1	0.093	0.316	-1.152	B1	3a	14031212
Exp. 3	B	DOR	2	mono	2	b2	3a_8	0	0.023	0.014	98.6	0.079	0.269	-1.313	B2	3a	14031212
Exp. 3	B	DOR	2	mono	2	c2	3a_9	0	0.024	0.015	98.5	0.088	0.299	-1.207	B3	3a	14031212
Exp. 3	B	DOR	2	mono	2	d2	3b_10	0	-0.001	-0.001	100.1	0.09	0.295	-1.221	B4	3b	1403101
Exp. 3	B	DOR	2	mono	2	e2	3b_11	0	0.067	0.039	96.1	0.147	0.482	-0.73	B5	3b	1403101
Exp. 3	B	DOR	2	mono	2	f2	3b_12	0	0.042	0.025	97.5	0.121	0.397	-0.924	B6	3b	1403101
Exp. 3	B	DOR	2	mono	2	a2	3b_7	0	0.01	0.006	99.4	0.088	0.289	-1.241	B1	3b	1403101
Exp. 3	B	DOR	2	mono	2	b2	3b_8	0	-0.006	-0.004	100.4	0.08	0.262	-1.339	B2	3b	1403101
Exp. 3	B	DOR	2	mono	2	c2	3b_9	0	-0.05	-0.029	102.9	0.092	0.302	-1.197	B3	3b	1403101
Exp. 3	C	CEF	2	mono	3	a2	3a_13	0	-0.006	-0.004	100.4	0.081	0.276	-1.287	E7	3a	14031212
Exp. 3	C	CEF	2	mono	3	b2	3a_14	0	-0.015	-0.009	100.9	0.086	0.293	-1.228	E8	3a	14031212
Exp. 3	C	CEF	2	mono	3	c2	3a_15	0	-0.034	-0.021	102.1	0.082	0.279	-1.277	E9	3a	14031212
Exp. 3	C	CEF	2	mono	3	d2	3a_16	0	-0.008	-0.005	100.5	0.075	0.255	-1.366	E10	3a	14031212
Exp. 3	C	CEF	2	mono	3	e2	3a_17	0	0.067	0.041	95.9	0.153	0.52	-0.654	E11	3a	14031212
Exp. 3	C	CEF	2	mono	3	f2	3a_18	0	-0.005	-0.003	100.3	0.083	0.282	-1.266	E12	3a	14031212
Exp. 3	C	CEF	2	mono	3	a2	3b_13	0	0.065	0.038	96.2	0.086	0.282	-1.266	E7	3b	1403101
Exp. 3	C	CEF	2	mono	3	b2	3b_14	0	-0.055	-0.032	103.2	0.085	0.279	-1.277	E8	3b	1403101
Exp. 3	C	CEF	2	mono	3	c2	3b_15	0	-0.003	-0.002	100.2	0.091	0.298	-1.211	E9	3b	1403101
Exp. 3	C	CEF	2	mono	3	d2	3b_16	1	-0.036	-0.021	102.1	0.089	0.292	-1.231	E10	3b	1403101
Exp. 3	C	CEF	2	mono	3	e2	3b_17	0	0.154	0.09	91	0.168	0.551	-0.596	E11	3b	1403101
Exp. 3	C	CEF	2	mono	3	f2	3b_18	0	0.016	0.009	99.1	0.092	0.302	-1.197	E12	3b	1403101
Exp. 3	B	DOR	2	fast_regular	5	a2	3a_24	0	0.164	0.101	89.9	0.221	0.752	-0.285	D1	3a	14031212
Exp. 3	B	DOR	2	fast_regular	5	b2	3a_25	1	0.019	0.012	98.8	0.08	0.272	-1.302	D2	3a	14031212
Exp. 3	B	DOR	2	fast_regular	5	c2	3a_26	1	0.007	0.004	99.6	0.086	0.293	-1.228	D3	3a	14031212
Exp. 3	B	DOR	2	fast_regular	5	d2	3a_27	0	0.047	0.029	97.1	0.082	0.279	-1.277	D4	3a	14031212
Exp. 3	B	DOR	2	fast_regular	5	e2	3a_28	1	0.001	0.001	99.9	0.083	0.282	-1.266	D5	3a	14031212
Exp. 3	B	DOR	2	fast_regular	5	f2	3a_29	1	0.021	0.013	98.7	0.087	0.296	-1.217	D6	3a	14031212
Exp. 3	B	DOR	2	fast_regular	5	a2	3b_24	0	0.12	0.07	93	0.221	0.725	-0.322	D1	3b	1403101
Exp. 3	B	DOR	2	fast_regular	5	b2	3b_25	1	-0.012	-0.007	100.7	0.085	0.279	-1.277	D2	3b	1403101
Exp. 3	B	DOR	2	fast_regular	5	c2	3b_26	0	-0.021	-0.012	101.2	0.082	0.269	-1.313	D3	3b	1403101
Exp. 3	B	DOR	2	fast_regular	5	d2	3b_27	0	-0.035	-0.021	102.1	0.081	0.266	-1.324	D4	3b	1403101
Exp. 3	B	DOR	2	fast_regular	5	e2	3b_28	0	-0.046	-0.027	102.7	0.085	0.279	-1.277	D5	3b	1403101
Exp. 3	B	DOR	2	fast_regular	5	f2	3b_29	1	-0.002	-0.001	100.1	0.082	0.269	-1.313	D6	3b	1403101
Exp. 3	A	CAR	2	fast_regular	6	a2	3a_30	0	0.003	0.002	99.8	0.09	0.306	-1.184	C7	3a	14031212
Exp. 3	A	CAR	2	fast_regular	6	b2	3a_31	0	0.028	0.017	98.3	0.083	0.282	-1.266	C8	3a	14031212
Exp. 3	A	CAR	2	fast_regular	6	c2	3a_32	1	0.033	0.02	98	0.085	0.289	-1.241	C9	3a	14031212
Exp. 3	A	CAR	2	fast_regular	6	d2	3a_33	0	-0.004	-0.002	100.2	0.079	0.269	-1.313	C10	3a	14031212
Exp. 3	A	CAR	2	fast_regular	6	e2	3a_34	1	-0.012	-0.007	100.7	0.081	0.276	-1.287	C11	3a	14031212
Exp. 3	A	CAR	2	fast_regular	6	f2	3a_35	1	0.007	0.004	99.6	0.084	0.286	-1.252	C12	3a	14031212
Exp. 3	A	CAR	2	fast_regular	6	a2	3b_30	0	-0.002	-0.001	100.1	0.081	0.266	-1.324	C7	3b	1403101
Exp. 3	A	CAR	2	fast_regular	6	b2	3b_31	0	0.016	0.009	99.1	0.096	0.315	-1.155	C8	3b	1403101
Exp. 3	A	CAR	2	fast_regular	6	c2	3b_32	1	-0.033	-0.019	101.9	0.083	0.272	-1.302	C9	3b	1403101
Exp. 3	A	CAR	2	fast_regular	6	d2	3b_33	1	0.027	0.016	98.4	0.082	0.269	-1.313	C10	3b	1403101
Exp. 3	A	CAR	2	fast_regular	6	e2	3b_34	0	0.026	0.015	98.5	0.084	0.275	-1.291	C11	3b	1403101
Exp. 3	A	CAR	2	fast_regular	6	f2	3b_35	0	-0.07	-0.041	104.1	0.069	0.226	-1.487	C12	3b	1403101
Exp. 3	A	CAR	2	fast_regular	7	a2	3a_36	0	-0.012	-0.007	100.7	0.088	0.299	-1.207	F1	3a	14031212
Exp. 3	A	CAR	2	fast_regular	7	b2	3a_37	0	0	0	100	0.083	0.282	-1.266	F2	3a	14031212
Exp. 3	A	CAR	2	fast_regular	7	c2	3a_38	0	0.037	0.023	97.7	0.086	0.293	-1.228	F3	3a	14031212
Exp. 3	A	CAR	2	fast_regular	7	d2	3a_39	0	-0.02	-0.012	101.2	0.08	0.272	-1.302	F4	3a	14031212
Exp. 3	A	CAR	2	fast_regular	7	e2	3a_40	0	-0.031	-0.019	101.9	0.088	0.299	-1.207	F5	3a	14031212
Exp. 3	A	CAR	2	fast_regular	7	f2	3a_41	0	-0.017	-0.011	101.1	0.084	0.286	-1.252	F6	3a	14031212
Exp. 3	A	CAR	2	fast_regular	7	a2	3b_36	0	-0.02	-0.012	101.2	0.083	0.272	-1.302	F1	3b	1403101
Exp. 3	A	CAR	2	fast_regular	7	b2	3b_37	1	-0.062	-0.036	103.6	0.083	0.272	-1.302	F2	3b	1403101
Exp. 3	A	CAR	2	fast_regular	7	c2	3b_38	1	-0.038	-0.022	102.2	0.092	0.302	-1.197	F3	3b	1403101
Exp. 3	A	CAR	2	fast_regular	7	d2	3b_39	1	-0.011	-0.006	100.6	0.093	0.305	-1.187	F4	3b	1403101
Exp. 3	A	CAR	2	fast_regular	7	e2	3b_40	0	0.014	0.008	99.2	0.092	0.302	-1.197	F5	3b	1403101
Exp. 3	A	CAR	2	fast_regular	7	f2	3b_41	1	0.058	0.034	96.6	0.091	0.298	-1.211	F6	3b	1403101
Exp. 3	A	CAR	2	slow_regular	8	a2	3a_42	0	0.013	0.008	99.2	0.117	0.398	-0.921	B7	3a	14031212
Exp. 3	A	CAR	2	slow_regular	8	b2	3a_43	0	-0.015	-0.009	100.9	0.078	0.265	-1.328	B8	3a	14031212
Exp. 3	A	CAR	2	slow_regular	8	c2	3a_44	0	0.002	0.001	99.9	0.079	0.269	-1.313	B9	3a	14031212
Exp. 3	A	CAR	2	slow_regular	8	d2	3a_45	0	0.054	0.033	96.7	0.141	0.48	-0.734	B10	3a	14031212
Exp. 3	A	CAR	2	slow_regular	8	e2	3a_46	0	-0.02	-0.012	101.2	0.085	0.289	-1.241	B11	3a	14031212
Exp. 3	A	CAR	2	slow_regular	8	f2	3a_47	0	-0.019	-0.012	101.2	0.084	0.286	-1.252	B12	3a	14031212
Exp. 3	A	CAR	2	slow_regular	8	a2	3b_42	0	-0.001	-0.001	100.1	0.11	0.361	-1.019	B7	3b	1403101
Exp. 3	A	CAR	2	slow_regular	8	b2	3b_43	0	-0.011	-0.006	100.6	0.088	0.289	-1.241	B8	3b	1403101
Exp. 3	A	CAR	2	slow_regular	8	c2	3b_44	0	-0.023	-0.013	101.3	0.083	0.272	-1.302	B9	3b	1403101
Exp. 3	A	CAR	2	slow_regular	8	d2	3b_45	0	0.094	0.055	94.5	0.141	0.462	-0.772	B10	3b	1403101
Exp. 3	A	CAR	2	slow_regular	8	e2	3b_46	0	0.18	0.106	89.4	0.114	0.374	-0.983	B11	3b	1403101
Exp. 3	B	DOR	2	slow_regular	9	a2	3a_48	0	0.015	0.009	99.1	0.098	0.333	-1.1	A1	3a	14031212
Exp. 3	B	DOR	2	slow_regular	9	b2	3a_49	0	0.031	0.019	98.1	0.083	0.282	-1.266	A2	3a	14031212
Exp. 3	B	DOR	2	slow_regular	9	c2	3a_50	0	-0.002	-0.001	100.1	0.087	0.296	-1.217	A3	3a	14031212
Exp. 3	B	DOR	2	slow_regular	9	d2	3a_51	0	-0.016	-0.01	101	0.076	0.259	-1.351	A4	3a	14031212
Exp. 3	B	DOR	2	slow_regular	9	e2	3a_52	0	0.107	0.066	93.4	0.186	0.633	-0.457	A5	3a	14031212
Exp. 3	B	DOR	2	slow_regular	9	f2	3a_53	0	0.021	0.013	98.7	0.136	0.463	-0.77	A6	3a	14031212
Exp. 3	B	DOR	2	slow_regular	9	a2	3b_48	0	-0.013	-0.008	100.8	0.097	0.318	-1.146	A1	3b	1403101
Exp. 3	B	DOR	2	slow_regular	9	b2	3b_49	0	0.007	0.004	99.6	0.084	0.275	-1.291	A2	3b	1403101
Exp. 3	B	DOR	2	slow_regular	9	c2	3b_50	0	0.012	0.007	99.3	0.088	0.289	-1.241	A3	3b	1403101
Exp. 3	B	DOR	2	slow_regular	9	d2	3b_51	0	0.004	0.002	99.8	0.085	0.279	-1.277	A4	3b	1403101
Exp. 3	B	DOR	2	slow_regular	9	e2	3b_52	0	0.047	0.028	97.2	0.144	0.472	-0.751	A5	3b	1403101
Exp. 3	B	DOR	2	slow_regular	9	f2	3b_53	0	0.042	0.025	97.5	0.116	0.38	-0.968	A6	3b	1403101
Exp. 3	C	CEF	2	slow_regular	10	a2	3a_54	0	-0.067	-0.041	104.1	0.079	0.269	-1.313	A7	3a	14031212
Exp. 3	C	CEF	2	slow_regular	10	b2	3a_55	0	-0.002	-0.001	100.1	0.079	0.269	-1.313	A8	3a	14031212
Exp. 3	C	CEF	2	slow_regular	10	c2	3a_56	0	-0.009	-0.006	100.6	0.084	0.286	-1.252	A9	3a	14031212
Exp. 3	C	CEF	2	slow_regular	10	d2	3a_57	1	-0.011	-0.007	100.7	0.081	0.276	-1.287	A10	3a	14031212
Exp. 3	C	CEF	2	slow_regular	10	e2	3a_58	0	0.121	0.075	92.5	0.167	0.568	-0.566	A11	3a	14031212
Exp. 3	C	CEF	2	slow_regular	10	f2	3a_59	0	0.023	0.014	98.6	0.087	0.296	-1.217	A12	3a	14031212
Exp. 3	C	CEF	2	slow_regular	10	a2	3b_54	0	0.01	0.006	99.4	0.088	0.289	-1.241	A7	3b	1403101
Exp. 3	C	CEF	2	slow_regular	10	b2	3b_55	0	-0.026	-0.015	101.5	0.087	0.285	-1.255	A8	3b	1403101
Exp. 3	C	CEF	2	slow_regular	10	c2	3b_56	0	-0.002	-0.001	100.1	0.086	0.282	-1.266	A9	3b	1403101
Exp. 3	C	CEF	2	slow_regular	10	d2	3b_57	1	-0.019	-0.011	101.1	0.081	0.266	-1.324	A10	3b	1403101
Exp. 3	B	DOR	2	random	11	a2	3a_60	0	0.133	0.082	91.8	0.205	0.697	-0.361	C1	3a	14031212
Exp. 3	B	DOR	2	random	11	b2	3a_61	1	-0.036	-0.022	102.2	0.078	0.265	-1.328	C2	3a	14031212
Exp. 3	B	DOR	2	random	11	c2	3a_62	1	-0.022	-0.014	101.4	0.083	0.282	-1.266	C3	3a	14031212
Exp. 3	B	DOR	2	random	11	d2	3a_63	0	0.016	0.01	99	0.083	0.282	-1.266	C4	3a	14031212
Exp. 3	B	DOR	2	random	11	e2	3a_64	1	0.037	0.023	97.7	0.084	0.286	-1.252	C5	3a	14031212
Exp. 3	B	DOR	2	random	11	f2	3a_65	1	0	0	100	0.082	0.279	-1.277	C6	3a	14031212
Exp. 3	B	DOR	2	random	11	a2	3b_60	0	0.163	0.096	90.4	0.221	0.725	-0.322	C1	3b	1403101
Exp. 3	B	DOR	2	random	11	b2	3b_61	1	-0.037	-0.022	102.2	0.079	0.259	-1.351	C2	3b	1403101
Exp. 3	B	DOR	2	random	11	c2	3b_62	1	0.01	0.006	99.4	0.085	0.279	-1.277	C3	3b	1403101
Exp. 3	B	DOR	2	random	11	d2	3b_63	0	-0.018	-0.011	101.1	0.092	0.302	-1.197	C4	3b	1403101
Exp. 3	B	DOR	2	random	11	e2	3b_64	0	-0.016	-0.009	100.9	0.087	0.285	-1.255	C5	3b	1403101
Exp. 3	B	DOR	2	random	11	f2	3b_65	1	0.017	0.01	99	0.089	0.292	-1.231	C6	3b	1403101
Exp. 3	A	CAR	2	random	12	a2	3a_66	0	0.016	0.01	99	0.093	0.316	-1.152	E1	3a	14031212
Exp. 3	A	CAR	2	random	12	b2	3a_67	0	0.048	0.03	97	0.081	0.276	-1.287	E2	3a	14031212
Exp. 3	A	CAR	2	random	12	c2	3a_68	0	0.014	0.009	99.1	0.082	0.279	-1.277	E3	3a	14031212
Exp. 3	A	CAR	2	random	12	d2	3a_69	1	0.028	0.017	98.3	0.086	0.293	-1.228	E4	3a	14031212
Exp. 3	A	CAR	2	random	12	e2	3a_70	0	-0.037	-0.023	102.3	0.079	0.269	-1.313	E5	3a	14031212
Exp. 3	A	CAR	2	random	12	f2	3a_71	1	0.05	0.031	96.9	0.089	0.303	-1.194	E6	3a	14031212
Exp. 3	A	CAR	2	random	12	a2	3b_66	0	0.005	0.003	99.7	0.086	0.282	-1.266	E1	3b	1403101
Exp. 3	A	CAR	2	random	12	b2	3b_67	0	0.029	0.017	98.3	0.085	0.279	-1.277	E2	3b	1403101
Exp. 3	A	CAR	2	random	12	c2	3b_68	0	-0.025	-0.015	101.5	0.081	0.266	-1.324	E3	3b	1403101
Exp. 3	A	CAR	2	random	12	d2	3b_69	1	-0.049	-0.029	102.9	0.082	0.269	-1.313	E4	3b	1403101
Exp. 3	A	CAR	2	random	12	e2	3b_70	1	-0.044	-0.026	102.6	0.08	0.262	-1.339	E5	3b	1403101
Exp. 3	A	CAR	2	random	12	f2	3b_71	1	-0.035	-0.021	102.1	0.078	0.256	-1.363	E6	3b	1403101
Exp. 3	A	CAR	2	random	13	a2	3a_72	0	-0.065	-0.04	104	0.08	0.272	-1.302	G1	3a	14031212
Exp. 3	A	CAR	2	random	13	b2	3a_73	0	-0.046	-0.028	102.8	0.081	0.276	-1.287	G2	3a	14031212
Exp. 3	A	CAR	2	random	13	c2	3a_74	1	-0.038	-0.024	102.4	0.079	0.269	-1.313	G3	3a	14031212
Exp. 3	A	CAR	2	random	13	d2	3a_75	0	-0.011	-0.007	100.7	0.078	0.265	-1.328	G4	3a	14031212
Exp. 3	A	CAR	2	random	13	e2	3a_76	0	0.011	0.007	99.3	0.085	0.289	-1.241	G5	3a	14031212
Exp. 3	A	CAR	2	random	13	f2	3a_77	1	-0.013	-0.008	100.8	0.088	0.299	-1.207	G6	3a	14031212
Exp. 3	A	CAR	2	random	13	a2	3b_72	0	-0.015	-0.009	100.9	0.082	0.269	-1.313	G1	3b	1403101
Exp. 3	A	CAR	2	random	13	b2	3b_73	1	-0.026	-0.015	101.5	0.081	0.266	-1.324	G2	3b	1403101
Exp. 3	A	CAR	2	random	13	c2	3b_74	0	-0.02	-0.012	101.2	0.083	0.272	-1.302	G3	3b	1403101
Exp. 3	A	CAR	2	random	13	d2	3b_75	0	-0.023	-0.013	101.3	0.08	0.262	-1.339	G4	3b	1403101
Exp. 3	A	CAR	2	random	13	e2	3b_76	0	-0.044	-0.026	102.6	0.085	0.279	-1.277	G5	3b	1403101
Exp. 3	A	CAR	2	random	13	f2	3b_77	1	0.038	0.022	97.8	0.093	0.305	-1.187	G6	3b	1403101
Exp. 3	A	CAR	2	random	14	a2	3a_78	0	-0.014	-0.009	100.9	0.108	0.367	-1.002	D7	3a	14031212
Exp. 3	A	CAR	2	random	14	b2	3a_79	1	-0.071	-0.044	104.4	0.085	0.289	-1.241	D8	3a	14031212
Exp. 3	A	CAR	2	random	14	c2	3a_80	0	0.021	0.013	98.7	0.082	0.279	-1.277	D9	3a	14031212
Exp. 3	A	CAR	2	random	14	d2	3a_81	0	-0.012	-0.007	100.7	0.116	0.395	-0.929	D10	3a	14031212
Exp. 3	A	CAR	2	random	14	e2	3a_82	1	-0.066	-0.041	104.1	0.077	0.262	-1.339	D11	3a	14031212
Exp. 3	A	CAR	2	random	14	f2	3a_83	0	-0.01	-0.006	100.6	0.083	0.282	-1.266	D12	3a	14031212
Exp. 3	A	CAR	2	random	14	a2	3b_78	0	0.037	0.022	97.8	0.109	0.357	-1.03	D7	3b	1403101
Exp. 3	A	CAR	2	random	14	b2	3b_79	1	-0.026	-0.015	101.5	0.09	0.295	-1.221	D8	3b	1403101
Exp. 3	A	CAR	2	random	14	c2	3b_80	0	-0.024	-0.014	101.4	0.084	0.275	-1.291	D9	3b	1403101
Exp. 3	A	CAR	2	random	14	d2	3b_81	0	0.055	0.032	96.8	0.125	0.41	-0.892	D10	3b	1403101
Exp. 3	A	CAR	2	random	14	e2	3b_82	1	0.011	0.006	99.4	0.086	0.282	-1.266	D11	3b	1403101
Exp. 3	A	CAR	2	random	14	f2	3b_83	0	0.028	0.016	98.4	0.092	0.302	-1.197	D12	3b	1403101
Exp. 3	B	DOR	2	random	15	a2	3a_84	1	0.024	0.015	98.5	0.083	0.282	-1.266	H1	3a	14031212
Exp. 3	B	DOR	2	random	15	b2	3a_85	1	0.005	0.003	99.7	0.088	0.299	-1.207	H2	3a	14031212
Exp. 3	B	DOR	2	random	15	c2	3a_86	0	-0.005	-0.003	100.3	0.086	0.293	-1.228	H3	3a	14031212
Exp. 3	B	DOR	2	random	15	d2	3a_87	1	-0.02	-0.012	101.2	0.075	0.255	-1.366	H4	3a	14031212
Exp. 3	B	DOR	2	random	15	e2	3a_88	0	0.088	0.054	94.6	0.16	0.544	-0.609	H5	3a	14031212
Exp. 3	B	DOR	2	random	15	f2	3a_89	0	0.062	0.038	96.2	0.14	0.476	-0.742	H6	3a	14031212
Exp. 3	B	DOR	2	random	15	a2	3b_84	1	0.006	0.004	99.6	0.082	0.269	-1.313	H1	3b	1403101
Exp. 3	B	DOR	2	random	15	b2	3b_85	1	0.026	0.015	98.5	0.084	0.275	-1.291	H2	3b	1403101
Exp. 3	B	DOR	2	random	15	c2	3b_86	1	-0.009	-0.005	100.5	0.088	0.289	-1.241	H3	3b	1403101
Exp. 3	B	DOR	2	random	15	d2	3b_87	1	-0.001	-0.001	100.1	0.079	0.259	-1.351	H4	3b	1403101
Exp. 3	B	DOR	2	random	15	e2	3b_88	0	0.039	0.023	97.7	0.133	0.436	-0.83	H5	3b	1403101
Exp. 3	B	DOR	2	random	15	f2	3b_89	0	0.016	0.009	99.1	0.122	0.4	-0.916	H6	3b	1403101
Exp. 3	C	CEF	2	random	16	a2	3a_90	0	0.008	0.005	99.5	0.089	0.303	-1.194	H7	3a	14031212
Exp. 3	C	CEF	2	random	16	b2	3a_91	0	-0.043	-0.027	102.7	0.074	0.252	-1.378	H8	3a	14031212
Exp. 3	C	CEF	2	random	16	c2	3a_92	0	-0.014	-0.009	100.9	0.085	0.289	-1.241	H9	3a	14031212
Exp. 3	C	CEF	2	random	16	d2	3a_93	1	-0.034	-0.021	102.1	0.093	0.316	-1.152	H10	3a	14031212
Exp. 3	C	CEF	2	random	16	e2	3a_94	0	0.001	0.001	99.9	0.143	0.486	-0.722	H11	3a	14031212
Exp. 3	C	CEF	2	random	16	f2	3a_95	0	-0.015	-0.009	100.9	0.088	0.299	-1.207	H12	3a	14031212
Exp. 3	C	CEF	2	random	16	a2	3b_90	0	0.02	0.012	98.8	0.084	0.275	-1.291	H7	3b	1403101
Exp. 3	C	CEF	2	random	16	b2	3b_91	0	-0.025	-0.015	101.5	0.083	0.272	-1.302	H8	3b	1403101
Exp. 3	C	CEF	2	random	16	c2	3b_92	0	0.012	0.007	99.3	0.093	0.305	-1.187	H9	3b	1403101
Exp. 3	C	CEF	2	random	16	d2	3b_93	1	-0.025	-0.015	101.5	0.079	0.259	-1.351	H10	3b	1403101
Exp. 3	C	CEF	2	random	16	e2	3b_94	0	0.091	0.053	94.7	0.164	0.538	-0.62	H11	3b	1403101
Exp. 3	C	CEF	2	random	16	f2	3b_95	1	-0.007	-0.004	100.4	0.082	0.269	-1.313	H12	3b	1403101
Exp. 3	A	CAR	3	mono	1	a2	3a_1	0	0.999	0.68	32	0.219	0.766	-0.267	G7	3a	14031212
Exp. 3	A	CAR	3	mono	1	b2	3a_2	0	0.071	0.048	95.2	0.154	0.538	-0.62	G8	3a	14031212
Exp. 3	A	CAR	3	mono	1	c2	3a_3	0	0.571	0.389	61.1	0.264	0.923	-0.08	G9	3a	14031212
Exp. 3	A	CAR	3	mono	1	d2	3a_4	0	1.394	0.949	5.1	0.277	0.969	-0.031	G10	3a	14031212
Exp. 3	A	CAR	3	mono	1	e2	3a_5	1	-0.071	-0.048	104.8	0.076	0.266	-1.324	G11	3a	14031212
Exp. 3	A	CAR	3	mono	1	f2	3a_6	0	0.419	0.285	71.5	0.198	0.692	-0.368	G12	3a	14031212
Exp. 3	A	CAR	3	mono	1	a2	3b_1	0	0.75	0.489	51.1	0.212	0.741	-0.3	G7	3b	1403101
Exp. 3	A	CAR	3	mono	1	b2	3b_2	0	-0.111	-0.072	107.2	0.077	0.269	-1.313	G8	3b	1403101
Exp. 3	A	CAR	3	mono	1	c2	3b_3	0	0.581	0.379	62.1	0.283	0.99	-0.01	G9	3b	1403101
Exp. 3	A	CAR	3	mono	1	d2	3b_4	0	1.378	0.898	10.2	0.289	1.01	0.01	G10	3b	1403101
Exp. 3	A	CAR	3	mono	1	e2	3b_5	0	0.016	0.01	99	0.086	0.301	-1.201	G11	3b	1403101
Exp. 3	A	CAR	3	mono	1	f2	3b_6	0	0.224	0.146	85.4	0.169	0.591	-0.526	G12	3b	1403101
Exp. 3	B	DOR	3	mono	2	d2	3a_10	0	-0.01	-0.007	100.7	0.08	0.28	-1.273	B4	3a	14031212
Exp. 3	B	DOR	3	mono	2	e2	3a_11	0	0.916	0.624	37.6	0.206	0.72	-0.329	B5	3a	14031212
Exp. 3	B	DOR	3	mono	2	f2	3a_12	0	1.254	0.854	14.6	0.265	0.927	-0.076	B6	3a	14031212
Exp. 3	B	DOR	3	mono	2	a2	3a_7	0	-0.003	-0.002	100.2	0.083	0.29	-1.238	B1	3a	14031212
Exp. 3	B	DOR	3	mono	2	b2	3a_8	0	0.07	0.048	95.2	0.161	0.563	-0.574	B2	3a	14031212
Exp. 3	B	DOR	3	mono	2	c2	3a_9	0	0.767	0.522	47.8	0.26	0.909	-0.095	B3	3a	14031212
Exp. 3	B	DOR	3	mono	2	d2	3b_10	0	-0.007	-0.005	100.5	0.095	0.332	-1.103	B4	3b	1403101
Exp. 3	B	DOR	3	mono	2	e2	3b_11	0	0.714	0.465	53.5	0.214	0.748	-0.29	B5	3b	1403101
Exp. 3	B	DOR	3	mono	2	f2	3b_12	0	0.956	0.623	37.7	0.234	0.818	-0.201	B6	3b	1403101
Exp. 3	B	DOR	3	mono	2	a2	3b_7	0	0.017	0.011	98.9	0.096	0.336	-1.091	B1	3b	1403101
Exp. 3	B	DOR	3	mono	2	b2	3b_8	0	0.133	0.087	91.3	0.162	0.566	-0.569	B2	3b	1403101
Exp. 3	B	DOR	3	mono	2	c2	3b_9	0	0.647	0.421	57.9	0.24	0.839	-0.176	B3	3b	1403101
Exp. 3	C	CEF	3	mono	3	a2	3a_13	0	0.6	0.408	59.2	0.278	0.972	-0.028	E7	3a	14031212
Exp. 3	C	CEF	3	mono	3	b2	3a_14	0	0.88	0.599	40.1	0.298	1.042	0.041	E8	3a	14031212
Exp. 3	C	CEF	3	mono	3	c2	3a_15	0	0.538	0.366	63.4	0.286	1	0	E9	3a	14031212
Exp. 3	C	CEF	3	mono	3	d2	3a_16	0	-0.087	-0.059	105.9	0.069	0.241	-1.423	E10	3a	14031212
Exp. 3	C	CEF	3	mono	3	e2	3a_17	0	1.524	1.037	-3.7	0.295	1.031	0.031	E11	3a	14031212
Exp. 3	C	CEF	3	mono	3	f2	3a_18	0	0.054	0.037	96.3	0.123	0.43	-0.844	E12	3a	14031212
Exp. 3	C	CEF	3	mono	3	a2	3b_13	0	0.283	0.184	81.6	0.23	0.804	-0.218	E7	3b	1403101
Exp. 3	C	CEF	3	mono	3	b2	3b_14	0	0.785	0.511	48.9	0.299	1.045	0.044	E8	3b	1403101
Exp. 3	C	CEF	3	mono	3	c2	3b_15	0	0.669	0.436	56.4	0.277	0.969	-0.031	E9	3b	1403101
Exp. 3	C	CEF	3	mono	3	d2	3b_16	1	-0.013	-0.008	100.8	0.077	0.269	-1.313	E10	3b	1403101
Exp. 3	C	CEF	3	mono	3	e2	3b_17	0	1.371	0.893	10.7	0.278	0.972	-0.028	E11	3b	1403101
Exp. 3	C	CEF	3	mono	3	f2	3b_18	0	0.026	0.017	98.3	0.089	0.311	-1.168	E12	3b	1403101
Exp. 3	C	CEF	3	fast_regular	5	a2	3a_24	0	1.488	1.013	-1.3	0.258	0.902	-0.103	D7	3a	14031212
Exp. 3	C	CEF	3	fast_regular	5	b2	3a_25	1	-0.011	-0.007	100.7	0.077	0.269	-1.313	D8	3a	14031212
Exp. 3	C	CEF	3	fast_regular	5	c2	3a_26	1	0.017	0.012	98.8	0.081	0.283	-1.262	D9	3a	14031212
Exp. 3	C	CEF	3	fast_regular	5	d2	3a_27	0	0.002	0.001	99.9	0.112	0.392	-0.936	D10	3a	14031212
Exp. 3	C	CEF	3	fast_regular	5	e2	3a_28	1	-0.051	-0.035	103.5	0.087	0.304	-1.191	D11	3a	14031212
Exp. 3	C	CEF	3	fast_regular	5	f2	3a_29	1	0.017	0.012	98.8	0.081	0.283	-1.262	D12	3a	14031212
Exp. 3	C	CEF	3	fast_regular	5	a2	3b_24	0	1.326	0.864	13.6	0.256	0.895	-0.111	D7	3b	1403101
Exp. 3	C	CEF	3	fast_regular	5	b2	3b_25	1	0.036	0.023	97.7	0.082	0.287	-1.248	D8	3b	1403101
Exp. 3	C	CEF	3	fast_regular	5	c2	3b_26	0	-0.002	-0.001	100.1	0.075	0.262	-1.339	D9	3b	1403101
Exp. 3	C	CEF	3	fast_regular	5	d2	3b_27	0	0.019	0.012	98.8	0.114	0.399	-0.919	D10	3b	1403101
Exp. 3	C	CEF	3	fast_regular	5	e2	3b_28	0	-0.012	-0.008	100.8	0.08	0.28	-1.273	D11	3b	1403101
Exp. 3	C	CEF	3	fast_regular	5	f2	3b_29	1	0.006	0.004	99.6	0.077	0.269	-1.313	D12	3b	1403101
Exp. 3	C	CEF	3	fast_regular	6	a2	3a_30	0	0.99	0.674	32.6	0.3	1.049	0.048	C7	3a	14031212
Exp. 3	C	CEF	3	fast_regular	6	b2	3a_31	0	-0.011	-0.007	100.7	0.079	0.276	-1.287	C8	3a	14031212
Exp. 3	C	CEF	3	fast_regular	6	c2	3a_32	1	0.002	0.001	99.9	0.076	0.266	-1.324	C9	3a	14031212
Exp. 3	C	CEF	3	fast_regular	6	d2	3a_33	0	-0.007	-0.005	100.5	0.083	0.29	-1.238	C10	3a	14031212
Exp. 3	C	CEF	3	fast_regular	6	e2	3a_34	1	-0.013	-0.009	100.9	0.077	0.269	-1.313	C11	3a	14031212
Exp. 3	C	CEF	3	fast_regular	6	f2	3a_35	1	-0.017	-0.012	101.2	0.085	0.297	-1.214	C12	3a	14031212
Exp. 3	C	CEF	3	fast_regular	6	a2	3b_30	0	0.696	0.453	54.7	0.289	1.01	0.01	C7	3b	1403101
Exp. 3	C	CEF	3	fast_regular	6	b2	3b_31	0	0.018	0.012	98.8	0.084	0.294	-1.224	C8	3b	1403101
Exp. 3	C	CEF	3	fast_regular	6	c2	3b_32	1	-0.029	-0.019	101.9	0.076	0.266	-1.324	C9	3b	1403101
Exp. 3	C	CEF	3	fast_regular	6	d2	3b_33	1	-0.001	-0.001	100.1	0.084	0.294	-1.224	C10	3b	1403101
Exp. 3	C	CEF	3	fast_regular	6	e2	3b_34	0	0.408	0.266	73.4	0.264	0.923	-0.08	C11	3b	1403101
Exp. 3	C	CEF	3	fast_regular	6	f2	3b_35	0	-0.229	-0.149	114.9	0.049	0.171	-1.766	C12	3b	1403101
Exp. 3	B	DOR	3	fast_regular	7	a2	3a_36	0	0.016	0.011	98.9	0.107	0.374	-0.983	F1	3a	14031212
Exp. 3	B	DOR	3	fast_regular	7	b2	3a_37	0	-0.018	-0.012	101.2	0.094	0.329	-1.112	F2	3a	14031212
Exp. 3	B	DOR	3	fast_regular	7	c2	3a_38	0	-0.013	-0.009	100.9	0.086	0.301	-1.201	F3	3a	14031212
Exp. 3	B	DOR	3	fast_regular	7	d2	3a_39	0	0.278	0.189	81.1	0.264	0.923	-0.08	F4	3a	14031212
Exp. 3	B	DOR	3	fast_regular	7	e2	3a_40	0	0.442	0.301	69.9	0.263	0.92	-0.083	F5	3a	14031212
Exp. 3	B	DOR	3	fast_regular	7	f2	3a_41	0	-0.047	-0.032	103.2	0.077	0.269	-1.313	F6	3a	14031212
Exp. 3	B	DOR	3	fast_regular	7	a2	3b_36	0	0.005	0.003	99.7	0.1	0.35	-1.05	F1	3b	1403101
Exp. 3	B	DOR	3	fast_regular	7	b2	3b_37	1	-0.043	-0.028	102.8	0.081	0.283	-1.262	F2	3b	1403101
Exp. 3	B	DOR	3	fast_regular	7	c2	3b_38	1	-0.023	-0.015	101.5	0.09	0.315	-1.155	F3	3b	1403101
Exp. 3	B	DOR	3	fast_regular	7	d2	3b_39	1	0.005	0.003	99.7	0.081	0.283	-1.262	F4	3b	1403101
Exp. 3	B	DOR	3	fast_regular	7	e2	3b_40	0	0.444	0.289	71.1	0.272	0.951	-0.05	F5	3b	1403101
Exp. 3	B	DOR	3	fast_regular	7	f2	3b_41	1	0.016	0.01	99	0.094	0.329	-1.112	F6	3b	1403101
Exp. 3	A	CAR	3	slow_regular	8	a2	3a_42	0	1.102	0.75	25	0.228	0.797	-0.227	B7	3a	14031212
Exp. 3	A	CAR	3	slow_regular	8	b2	3a_43	0	0.173	0.118	88.2	0.161	0.563	-0.574	B8	3a	14031212
Exp. 3	A	CAR	3	slow_regular	8	c2	3a_44	0	0.623	0.424	57.6	0.292	1.021	0.021	B9	3a	14031212
Exp. 3	A	CAR	3	slow_regular	8	d2	3a_45	0	1.584	1.078	-7.8	0.311	1.087	0.083	B10	3a	14031212
Exp. 3	A	CAR	3	slow_regular	8	e2	3a_46	0	0.035	0.024	97.6	0.098	0.343	-1.07	B11	3a	14031212
Exp. 3	A	CAR	3	slow_regular	8	f2	3a_47	0	0.273	0.186	81.4	0.193	0.675	-0.393	B12	3a	14031212
Exp. 3	A	CAR	3	slow_regular	8	a2	3b_42	0	0.955	0.622	37.8	0.206	0.72	-0.329	B7	3b	1403101
Exp. 3	A	CAR	3	slow_regular	8	b2	3b_43	0	0.105	0.068	93.2	0.143	0.5	-0.693	B8	3b	1403101
Exp. 3	A	CAR	3	slow_regular	8	c2	3b_44	0	0.687	0.448	55.2	0.289	1.01	0.01	B9	3b	1403101
Exp. 3	A	CAR	3	slow_regular	8	d2	3b_45	0	1.441	0.939	6.1	0.286	1	0	B10	3b	1403101
Exp. 3	A	CAR	3	slow_regular	8	e2	3b_46	0	0.114	0.074	92.6	0.098	0.343	-1.07	B11	3b	1403101
Exp. 3	B	DOR	3	slow_regular	9	a2	3a_48	0	-0.003	-0.002	100.2	0.084	0.294	-1.224	A1	3a	14031212
Exp. 3	B	DOR	3	slow_regular	9	b2	3a_49	0	0.017	0.012	98.8	0.102	0.357	-1.03	A2	3a	14031212
Exp. 3	B	DOR	3	slow_regular	9	c2	3a_50	0	0.689	0.469	53.1	0.263	0.92	-0.083	A3	3a	14031212
Exp. 3	B	DOR	3	slow_regular	9	d2	3a_51	0	-0.058	-0.039	103.9	0.081	0.283	-1.262	A4	3a	14031212
Exp. 3	B	DOR	3	slow_regular	9	e2	3a_52	0	0.845	0.575	42.5	0.218	0.762	-0.272	A5	3a	14031212
Exp. 3	B	DOR	3	slow_regular	9	f2	3a_53	0	1.238	0.843	15.7	0.286	1	0	A6	3a	14031212
Exp. 3	B	DOR	3	slow_regular	9	a2	3b_48	0	-0.01	-0.007	100.7	0.09	0.315	-1.155	A1	3b	1403101
Exp. 3	B	DOR	3	slow_regular	9	b2	3b_49	0	0.027	0.018	98.2	0.115	0.402	-0.911	A2	3b	1403101
Exp. 3	B	DOR	3	slow_regular	9	c2	3b_50	0	0.64	0.417	58.3	0.252	0.881	-0.127	A3	3b	1403101
Exp. 3	B	DOR	3	slow_regular	9	d2	3b_51	0	-0.005	-0.003	100.3	0.094	0.329	-1.112	A4	3b	1403101
Exp. 3	B	DOR	3	slow_regular	9	e2	3b_52	0	0.697	0.454	54.6	0.206	0.72	-0.329	A5	3b	1403101
Exp. 3	B	DOR	3	slow_regular	9	f2	3b_53	0	0.869	0.566	43.4	0.227	0.794	-0.231	A6	3b	1403101
Exp. 3	C	CEF	3	slow_regular	10	a2	3a_54	0	0.462	0.314	68.6	0.26	0.909	-0.095	A7	3a	14031212
Exp. 3	C	CEF	3	slow_regular	10	b2	3a_55	0	0.602	0.41	59	0.282	0.986	-0.014	A8	3a	14031212
Exp. 3	C	CEF	3	slow_regular	10	c2	3a_56	0	0.797	0.543	45.7	0.284	0.993	-0.007	A9	3a	14031212
Exp. 3	C	CEF	3	slow_regular	10	d2	3a_57	1	-0.029	-0.02	102	0.075	0.262	-1.339	A10	3a	14031212
Exp. 3	C	CEF	3	slow_regular	10	e2	3a_58	0	1.389	0.946	5.4	0.281	0.983	-0.017	A11	3a	14031212
Exp. 3	C	CEF	3	slow_regular	10	f2	3a_59	0	0.017	0.012	98.8	0.099	0.346	-1.061	A12	3a	14031212
Exp. 3	C	CEF	3	slow_regular	10	a2	3b_54	0	0.516	0.336	66.4	0.259	0.906	-0.099	A7	3b	1403101
Exp. 3	C	CEF	3	slow_regular	10	b2	3b_55	0	0.685	0.446	55.4	0.284	0.993	-0.007	A8	3b	1403101
Exp. 3	C	CEF	3	slow_regular	10	c2	3b_56	0	0.552	0.36	64	0.267	0.934	-0.068	A9	3b	1403101
Exp. 3	C	CEF	3	slow_regular	10	d2	3b_57	1	0.022	0.014	98.6	0.079	0.276	-1.287	A10	3b	1403101
Exp. 3	B	DOR	3	random	11	a2	3a_60	0	1.615	1.099	-9.9	0.303	1.059	0.057	C1	3a	14031212
Exp. 3	B	DOR	3	random	11	b2	3a_61	1	-0.03	-0.02	102	0.074	0.259	-1.351	C2	3a	14031212
Exp. 3	B	DOR	3	random	11	c2	3a_62	1	-0.009	-0.006	100.6	0.076	0.266	-1.324	C3	3a	14031212
Exp. 3	B	DOR	3	random	11	d2	3a_63	0	-0.056	-0.038	103.8	0.088	0.308	-1.178	C4	3a	14031212
Exp. 3	B	DOR	3	random	11	e2	3a_64	1	0.015	0.01	99	0.085	0.297	-1.214	C5	3a	14031212
Exp. 3	B	DOR	3	random	11	f2	3a_65	1	-0.034	-0.023	102.3	0.078	0.273	-1.298	C6	3a	14031212
Exp. 3	B	DOR	3	random	11	a2	3b_60	0	1.598	1.041	-4.1	0.294	1.028	0.028	C1	3b	1403101
Exp. 3	B	DOR	3	random	11	b2	3b_61	1	-0.025	-0.016	101.6	0.08	0.28	-1.273	C2	3b	1403101
Exp. 3	B	DOR	3	random	11	c2	3b_62	1	0.022	0.014	98.6	0.085	0.297	-1.214	C3	3b	1403101
Exp. 3	B	DOR	3	random	11	d2	3b_63	0	0.017	0.011	98.9	0.082	0.287	-1.248	C4	3b	1403101
Exp. 3	B	DOR	3	random	11	e2	3b_64	0	-0.007	-0.005	100.5	0.089	0.311	-1.168	C5	3b	1403101
Exp. 3	B	DOR	3	random	11	f2	3b_65	1	0.007	0.005	99.5	0.084	0.294	-1.224	C6	3b	1403101
Exp. 3	C	CEF	3	random	12	a2	3a_66	0	0.974	0.663	33.7	0.309	1.08	0.077	E1	3a	14031212
Exp. 3	C	CEF	3	random	12	b2	3a_67	0	-0.016	-0.011	101.1	0.079	0.276	-1.287	E2	3a	14031212
Exp. 3	C	CEF	3	random	12	c2	3a_68	0	0.082	0.056	94.4	0.16	0.559	-0.582	E3	3a	14031212
Exp. 3	C	CEF	3	random	12	d2	3a_69	1	-0.06	-0.041	104.1	0.094	0.329	-1.112	E4	3a	14031212
Exp. 3	C	CEF	3	random	12	e2	3a_70	0	0.962	0.655	34.5	0.329	1.15	0.14	E5	3a	14031212
Exp. 3	C	CEF	3	random	12	f2	3a_71	1	-0.004	-0.003	100.3	0.085	0.297	-1.214	E6	3a	14031212
Exp. 3	C	CEF	3	random	12	a2	3b_66	0	0.657	0.428	57.2	0.298	1.042	0.041	E1	3b	1403101
Exp. 3	C	CEF	3	random	12	b2	3b_67	0	0	0	100	0.083	0.29	-1.238	E2	3b	1403101
Exp. 3	C	CEF	3	random	12	c2	3b_68	0	-0.028	-0.018	101.8	0.081	0.283	-1.262	E3	3b	1403101
Exp. 3	C	CEF	3	random	12	d2	3b_69	1	-0.033	-0.021	102.1	0.086	0.301	-1.201	E4	3b	1403101
Exp. 3	C	CEF	3	random	12	e2	3b_70	1	-0.038	-0.025	102.5	0.076	0.266	-1.324	E5	3b	1403101
Exp. 3	C	CEF	3	random	12	f2	3b_71	1	-0.023	-0.015	101.5	0.083	0.29	-1.238	E6	3b	1403101
Exp. 3	A	CAR	3	random	13	a2	3a_72	0	0.005	0.003	99.7	0.085	0.297	-1.214	G1	3a	14031212
Exp. 3	A	CAR	3	random	13	b2	3a_73	0	-0.036	-0.025	102.5	0.081	0.283	-1.262	G2	3a	14031212
Exp. 3	A	CAR	3	random	13	c2	3a_74	1	-0.027	-0.018	101.8	0.075	0.262	-1.339	G3	3a	14031212
Exp. 3	A	CAR	3	random	13	d2	3a_75	0	-0.004	-0.003	100.3	0.124	0.434	-0.835	G4	3a	14031212
Exp. 3	A	CAR	3	random	13	e2	3a_76	0	0.13	0.088	91.2	0.153	0.535	-0.625	G5	3a	14031212
Exp. 3	A	CAR	3	random	13	f2	3a_77	1	-0.07	-0.048	104.8	0.078	0.273	-1.298	G6	3a	14031212
Exp. 3	A	CAR	3	random	13	a2	3b_72	0	-0.013	-0.008	100.8	0.082	0.287	-1.248	G1	3b	1403101
Exp. 3	A	CAR	3	random	13	b2	3b_73	1	0.009	0.006	99.4	0.077	0.269	-1.313	G2	3b	1403101
Exp. 3	A	CAR	3	random	13	c2	3b_74	0	0.101	0.066	93.4	0.149	0.521	-0.652	G3	3b	1403101
Exp. 3	A	CAR	3	random	13	d2	3b_75	0	-0.024	-0.016	101.6	0.101	0.353	-1.041	G4	3b	1403101
Exp. 3	A	CAR	3	random	13	e2	3b_76	0	0.082	0.053	94.7	0.109	0.381	-0.965	G5	3b	1403101
Exp. 3	A	CAR	3	random	13	f2	3b_77	1	0.019	0.012	98.8	0.087	0.304	-1.191	G6	3b	1403101
Exp. 3	B	DOR	3	random	14	a2	3a_78	0	1.458	0.993	0.7	0.302	1.056	0.054	D1	3a	14031212
Exp. 3	B	DOR	3	random	14	b2	3a_79	1	0.002	0.001	99.9	0.081	0.283	-1.262	D2	3a	14031212
Exp. 3	B	DOR	3	random	14	c2	3a_80	0	0.022	0.015	98.5	0.086	0.301	-1.201	D3	3a	14031212
Exp. 3	B	DOR	3	random	14	d2	3a_81	0	0.429	0.292	70.8	0.168	0.587	-0.533	D4	3a	14031212
Exp. 3	B	DOR	3	random	14	e2	3a_82	1	-0.033	-0.022	102.2	0.083	0.29	-1.238	D5	3a	14031212
Exp. 3	B	DOR	3	random	14	f2	3a_83	0	0.042	0.029	97.1	0.083	0.29	-1.238	D6	3a	14031212
Exp. 3	B	DOR	3	random	14	a2	3b_78	0	1.208	0.787	21.3	0.302	1.056	0.054	D1	3b	1403101
Exp. 3	B	DOR	3	random	14	b2	3b_79	1	-0.002	-0.001	100.1	0.082	0.287	-1.248	D2	3b	1403101
Exp. 3	B	DOR	3	random	14	c2	3b_80	0	-0.046	-0.03	103	0.09	0.315	-1.155	D3	3b	1403101
Exp. 3	B	DOR	3	random	14	d2	3b_81	0	0.31	0.202	79.8	0.146	0.51	-0.673	D4	3b	1403101
Exp. 3	B	DOR	3	random	14	e2	3b_82	1	-0.002	-0.001	100.1	0.085	0.297	-1.214	D5	3b	1403101
Exp. 3	B	DOR	3	random	14	f2	3b_83	0	0	0	100	0.077	0.269	-1.313	D6	3b	1403101
Exp. 3	A	CAR	3	random	15	a2	3a_84	1	0.013	0.009	99.1	0.083	0.29	-1.238	H7	3a	14031212
Exp. 3	A	CAR	3	random	15	b2	3a_85	1	-0.046	-0.031	103.1	0.073	0.255	-1.366	H8	3a	14031212
Exp. 3	A	CAR	3	random	15	c2	3a_86	0	0.002	0.001	99.9	0.077	0.269	-1.313	H9	3a	14031212
Exp. 3	A	CAR	3	random	15	d2	3a_87	1	-0.014	-0.01	101	0.076	0.266	-1.324	H10	3a	14031212
Exp. 3	A	CAR	3	random	15	e2	3a_88	0	0.26	0.177	82.3	0.104	0.364	-1.011	H11	3a	14031212
Exp. 3	A	CAR	3	random	15	f2	3a_89	0	0.289	0.197	80.3	0.102	0.357	-1.03	H12	3a	14031212
Exp. 3	A	CAR	3	random	15	a2	3b_84	1	-0.011	-0.007	100.7	0.084	0.294	-1.224	H7	3b	1403101
Exp. 3	A	CAR	3	random	15	b2	3b_85	1	-0.03	-0.02	102	0.084	0.294	-1.224	H8	3b	1403101
Exp. 3	A	CAR	3	random	15	c2	3b_86	1	-0.035	-0.023	102.3	0.082	0.287	-1.248	H9	3b	1403101
Exp. 3	A	CAR	3	random	15	d2	3b_87	1	-0.011	-0.007	100.7	0.085	0.297	-1.214	H10	3b	1403101
Exp. 3	A	CAR	3	random	15	e2	3b_88	0	0.14	0.091	90.9	0.104	0.364	-1.011	H11	3b	1403101
Exp. 3	A	CAR	3	random	15	f2	3b_89	0	0.051	0.033	96.7	0.093	0.325	-1.124	H12	3b	1403101
Exp. 3	B	DOR	3	random	16	a2	3a_90	0	0.42	0.286	71.4	0.266	0.93	-0.073	H1	3a	14031212
Exp. 3	B	DOR	3	random	16	b2	3a_91	0	0.86	0.585	41.5	0.301	1.052	0.051	H2	3a	14031212
Exp. 3	B	DOR	3	random	16	c2	3a_92	0	0.785	0.534	46.6	0.288	1.007	0.007	H3	3a	14031212
Exp. 3	B	DOR	3	random	16	d2	3a_93	1	0.001	0.001	99.9	0.072	0.252	-1.378	H4	3a	14031212
Exp. 3	B	DOR	3	random	16	e2	3a_94	0	1.323	0.901	9.9	0.268	0.937	-0.065	H5	3a	14031212
Exp. 3	B	DOR	3	random	16	f2	3a_95	0	-0.044	-0.03	103	0.122	0.427	-0.851	H6	3a	14031212
Exp. 3	B	DOR	3	random	16	a2	3b_90	0	0.549	0.358	64.2	0.281	0.983	-0.017	H1	3b	1403101
Exp. 3	B	DOR	3	random	16	b2	3b_91	0	0.494	0.322	67.8	0.267	0.934	-0.068	H2	3b	1403101
Exp. 3	B	DOR	3	random	16	c2	3b_92	0	0.699	0.455	54.5	0.288	1.007	0.007	H3	3b	1403101
Exp. 3	B	DOR	3	random	16	d2	3b_93	1	-0.004	-0.003	100.3	0.079	0.276	-1.287	H4	3b	1403101
Exp. 3	B	DOR	3	random	16	e2	3b_94	0	1.269	0.827	17.3	0.257	0.899	-0.106	H5	3b	1403101
Exp. 3	B	DOR	3	random	16	f2	3b_95	1	0.047	0.031	96.9	0.108	0.378	-0.973	H6	3b	1403101
Exp. 3	A	CAR	4	mono	1	a2	3a_1	0	1.205	0.762	23.8	0.223	0.78	-0.248	G7	3a	14031212
Exp. 3	A	CAR	4	mono	1	b2	3a_2	0	0.542	0.343	65.7	0.189	0.661	-0.414	G8	3a	14031212
Exp. 3	A	CAR	4	mono	1	c2	3a_3	0	1.374	0.869	13.1	0.272	0.951	-0.05	G9	3a	14031212
Exp. 3	A	CAR	4	mono	1	d2	3a_4	0	1.474	0.932	6.8	0.277	0.969	-0.031	G10	3a	14031212
Exp. 3	A	CAR	4	mono	1	e2	3a_5	1	-0.066	-0.042	104.2	0.071	0.248	-1.394	G11	3a	14031212
Exp. 3	A	CAR	4	mono	1	f2	3a_6	0	0.92	0.582	41.8	0.234	0.818	-0.201	G12	3a	14031212
Exp. 3	A	CAR	4	mono	1	a2	3b_1	0	1.231	0.796	20.4	0.247	0.855	-0.157	G7	3b	1403101
Exp. 3	A	CAR	4	mono	1	b2	3b_2	0	0.478	0.309	69.1	0.183	0.633	-0.457	G8	3b	1403101
Exp. 3	A	CAR	4	mono	1	c2	3b_3	0	1.484	0.96	4	0.273	0.945	-0.057	G9	3b	1403101
Exp. 3	A	CAR	4	mono	1	d2	3b_4	0	1.573	1.017	-1.7	0.279	0.965	-0.036	G10	3b	1403101
Exp. 3	A	CAR	4	mono	1	e2	3b_5	0	0.133	0.086	91.4	0.155	0.536	-0.624	G11	3b	1403101
Exp. 3	A	CAR	4	mono	1	f2	3b_6	0	0.678	0.439	56.1	0.184	0.637	-0.451	G12	3b	1403101
Exp. 3	B	DOR	4	mono	2	d2	3a_10	0	0.024	0.015	98.5	0.089	0.311	-1.168	B4	3a	14031212
Exp. 3	B	DOR	4	mono	2	e2	3a_11	0	1.172	0.741	25.9	0.256	0.895	-0.111	B5	3a	14031212
Exp. 3	B	DOR	4	mono	2	f2	3a_12	0	1.364	0.862	13.8	0.269	0.941	-0.061	B6	3a	14031212
Exp. 3	B	DOR	4	mono	2	a2	3a_7	0	0.089	0.056	94.4	0.147	0.514	-0.666	B1	3a	14031212
Exp. 3	B	DOR	4	mono	2	b2	3a_8	0	1.123	0.71	29	0.251	0.878	-0.13	B2	3a	14031212
Exp. 3	B	DOR	4	mono	2	c2	3a_9	0	1.372	0.867	13.3	0.265	0.927	-0.076	B3	3a	14031212
Exp. 3	B	DOR	4	mono	2	d2	3b_10	0	0.126	0.082	91.8	0.11	0.381	-0.965	B4	3b	1403101
Exp. 3	B	DOR	4	mono	2	e2	3b_11	0	1.146	0.741	25.9	0.256	0.886	-0.121	B5	3b	1403101
Exp. 3	B	DOR	4	mono	2	f2	3b_12	0	1.214	0.785	21.5	0.268	0.927	-0.076	B6	3b	1403101
Exp. 3	B	DOR	4	mono	2	a2	3b_7	0	0.231	0.149	85.1	0.2	0.692	-0.368	B1	3b	1403101
Exp. 3	B	DOR	4	mono	2	b2	3b_8	0	0.793	0.513	48.7	0.221	0.765	-0.268	B2	3b	1403101
Exp. 3	B	DOR	4	mono	2	c2	3b_9	0	1.282	0.829	17.1	0.254	0.879	-0.129	B3	3b	1403101
Exp. 3	C	CEF	4	mono	3	a2	3a_13	0	1.374	0.869	13.1	0.27	0.944	-0.058	E7	3a	14031212
Exp. 3	C	CEF	4	mono	3	b2	3a_14	0	1.417	0.896	10.4	0.272	0.951	-0.05	E8	3a	14031212
Exp. 3	C	CEF	4	mono	3	c2	3a_15	0	1.401	0.886	11.4	0.266	0.93	-0.073	E9	3a	14031212
Exp. 3	C	CEF	4	mono	3	d2	3a_16	0	-0.01	-0.006	100.6	0.098	0.343	-1.07	E10	3a	14031212
Exp. 3	C	CEF	4	mono	3	e2	3a_17	0	1.454	0.919	8.1	0.269	0.941	-0.061	E11	3a	14031212
Exp. 3	C	CEF	4	mono	3	f2	3a_18	0	0.948	0.599	40.1	0.226	0.79	-0.236	E12	3a	14031212
Exp. 3	C	CEF	4	mono	3	a2	3b_13	0	1.379	0.892	10.8	0.291	1.007	0.007	E7	3b	1403101
Exp. 3	C	CEF	4	mono	3	b2	3b_14	0	1.488	0.962	3.8	0.286	0.99	-0.01	E8	3b	1403101
Exp. 3	C	CEF	4	mono	3	c2	3b_15	0	1.342	0.868	13.2	0.256	0.886	-0.121	E9	3b	1403101
Exp. 3	C	CEF	4	mono	3	d2	3b_16	1	-0.003	-0.002	100.2	0.083	0.287	-1.248	E10	3b	1403101
Exp. 3	C	CEF	4	mono	3	e2	3b_17	0	1.421	0.919	8.1	0.272	0.941	-0.061	E11	3b	1403101
Exp. 3	C	CEF	4	mono	3	f2	3b_18	0	0.484	0.313	68.7	0.204	0.706	-0.348	E12	3b	1403101
Exp. 3	A	CAR	4	fast_regular	5	a2	3a_24	0	1.252	0.791	20.9	0.23	0.804	-0.218	D7	3a	14031212
Exp. 3	A	CAR	4	fast_regular	5	b2	3a_25	1	-0.006	-0.004	100.4	0.078	0.273	-1.298	D8	3a	14031212
Exp. 3	A	CAR	4	fast_regular	5	c2	3a_26	1	-0.027	-0.017	101.7	0.083	0.29	-1.238	D9	3a	14031212
Exp. 3	A	CAR	4	fast_regular	5	d2	3a_27	0	1.39	0.879	12.1	0.299	1.045	0.044	D10	3a	14031212
Exp. 3	A	CAR	4	fast_regular	5	e2	3a_28	1	-0.014	-0.009	100.9	0.081	0.283	-1.262	D11	3a	14031212
Exp. 3	A	CAR	4	fast_regular	5	f2	3a_29	1	0.007	0.004	99.6	0.08	0.28	-1.273	D12	3a	14031212
Exp. 3	A	CAR	4	fast_regular	5	a2	3b_24	0	1.178	0.762	23.8	0.235	0.813	-0.207	D7	3b	1403101
Exp. 3	A	CAR	4	fast_regular	5	b2	3b_25	1	-0.035	-0.023	102.3	0.077	0.266	-1.324	D8	3b	1403101
Exp. 3	A	CAR	4	fast_regular	5	c2	3b_26	0	-0.015	-0.01	101	0.073	0.253	-1.374	D9	3b	1403101
Exp. 3	A	CAR	4	fast_regular	5	d2	3b_27	0	1.398	0.904	9.6	0.304	1.052	0.051	D10	3b	1403101
Exp. 3	A	CAR	4	fast_regular	5	e2	3b_28	0	0.01	0.006	99.4	0.087	0.301	-1.201	D11	3b	1403101
Exp. 3	A	CAR	4	fast_regular	5	f2	3b_29	1	0.044	0.028	97.2	0.095	0.329	-1.112	D12	3b	1403101
Exp. 3	B	DOR	4	fast_regular	6	a2	3a_30	0	0.701	0.443	55.7	0.193	0.675	-0.393	C1	3a	14031212
Exp. 3	B	DOR	4	fast_regular	6	b2	3a_31	0	-0.046	-0.029	102.9	0.084	0.294	-1.224	C2	3a	14031212
Exp. 3	B	DOR	4	fast_regular	6	c2	3a_32	1	-0.014	-0.009	100.9	0.073	0.255	-1.366	C3	3a	14031212
Exp. 3	B	DOR	4	fast_regular	6	d2	3a_33	0	0.021	0.013	98.7	0.084	0.294	-1.224	C4	3a	14031212
Exp. 3	B	DOR	4	fast_regular	6	e2	3a_34	1	-0.004	-0.003	100.3	0.085	0.297	-1.214	C5	3a	14031212
Exp. 3	B	DOR	4	fast_regular	6	f2	3a_35	1	-0.036	-0.023	102.3	0.086	0.301	-1.201	C6	3a	14031212
Exp. 3	B	DOR	4	fast_regular	6	a2	3b_30	0	0.561	0.363	63.7	0.186	0.644	-0.44	C1	3b	1403101
Exp. 3	B	DOR	4	fast_regular	6	b2	3b_31	0	-0.026	-0.017	101.7	0.082	0.284	-1.259	C2	3b	1403101
Exp. 3	B	DOR	4	fast_regular	6	c2	3b_32	1	0.001	0.001	99.9	0.089	0.308	-1.178	C3	3b	1403101
Exp. 3	B	DOR	4	fast_regular	6	d2	3b_33	1	0.041	0.027	97.3	0.081	0.28	-1.273	C4	3b	1403101
Exp. 3	B	DOR	4	fast_regular	6	e2	3b_34	0	0.992	0.642	35.8	0.223	0.772	-0.259	C5	3b	1403101
Exp. 3	B	DOR	4	fast_regular	6	f2	3b_35	0	0.003	0.002	99.8	0.085	0.294	-1.224	C6	3b	1403101
Exp. 3	C	CEF	4	fast_regular	7	a2	3a_36	0	0.998	0.631	36.9	0.28	0.979	-0.021	F1	3a	14031212
Exp. 3	C	CEF	4	fast_regular	7	b2	3a_37	0	1.057	0.668	33.2	0.297	1.038	0.037	F2	3a	14031212
Exp. 3	C	CEF	4	fast_regular	7	c2	3a_38	0	0.001	0.001	99.9	0.083	0.29	-1.238	F3	3a	14031212
Exp. 3	C	CEF	4	fast_regular	7	d2	3a_39	0	1.619	1.023	-2.3	0.271	0.948	-0.053	F4	3a	14031212
Exp. 3	C	CEF	4	fast_regular	7	e2	3a_40	0	1.492	0.943	5.7	0.276	0.965	-0.036	F5	3a	14031212
Exp. 3	C	CEF	4	fast_regular	7	f2	3a_41	0	0.018	0.011	98.9	0.078	0.273	-1.298	F6	3a	14031212
Exp. 3	C	CEF	4	fast_regular	7	a2	3b_36	0	0.906	0.586	41.4	0.297	1.028	0.028	F1	3b	1403101
Exp. 3	C	CEF	4	fast_regular	7	b2	3b_37	1	-0.03	-0.019	101.9	0.083	0.287	-1.248	F2	3b	1403101
Exp. 3	C	CEF	4	fast_regular	7	c2	3b_38	1	0.026	0.017	98.3	0.084	0.291	-1.234	F3	3b	1403101
Exp. 3	C	CEF	4	fast_regular	7	d2	3b_39	1	-0.021	-0.014	101.4	0.098	0.339	-1.082	F4	3b	1403101
Exp. 3	C	CEF	4	fast_regular	7	e2	3b_40	0	1.374	0.889	11.1	0.276	0.955	-0.046	F5	3b	1403101
Exp. 3	C	CEF	4	fast_regular	7	f2	3b_41	1	0.051	0.033	96.7	0.086	0.298	-1.211	F6	3b	1403101
Exp. 3	A	CAR	4	slow_regular	8	a2	3a_42	0	1.184	0.748	25.2	0.23	0.804	-0.218	B7	3a	14031212
Exp. 3	A	CAR	4	slow_regular	8	b2	3a_43	0	0.682	0.431	56.9	0.209	0.731	-0.313	B8	3a	14031212
Exp. 3	A	CAR	4	slow_regular	8	c2	3a_44	0	1.42	0.898	10.2	0.273	0.955	-0.046	B9	3a	14031212
Exp. 3	A	CAR	4	slow_regular	8	d2	3a_45	0	1.576	0.996	0.4	0.287	1.003	0.003	B10	3a	14031212
Exp. 3	A	CAR	4	slow_regular	8	e2	3a_46	0	0.422	0.267	73.3	0.184	0.643	-0.442	B11	3a	14031212
Exp. 3	A	CAR	4	slow_regular	8	f2	3a_47	0	0.924	0.584	41.6	0.244	0.853	-0.159	B12	3a	14031212
Exp. 3	A	CAR	4	slow_regular	8	a2	3b_42	0	1.063	0.688	31.2	0.224	0.775	-0.255	B7	3b	1403101
Exp. 3	A	CAR	4	slow_regular	8	b2	3b_43	0	0.787	0.509	49.1	0.219	0.758	-0.277	B8	3b	1403101
Exp. 3	A	CAR	4	slow_regular	8	c2	3b_44	0	1.448	0.937	6.3	0.273	0.945	-0.057	B9	3b	1403101
Exp. 3	A	CAR	4	slow_regular	8	d2	3b_45	0	1.409	0.911	8.9	0.282	0.976	-0.024	B10	3b	1403101
Exp. 3	A	CAR	4	slow_regular	8	e2	3b_46	0	0.169	0.109	89.1	0.146	0.505	-0.683	B11	3b	1403101
Exp. 3	B	DOR	4	slow_regular	9	a2	3a_48	0	0.145	0.092	90.8	0.16	0.559	-0.582	A1	3a	14031212
Exp. 3	B	DOR	4	slow_regular	9	b2	3a_49	0	0.946	0.598	40.2	0.278	0.972	-0.028	A2	3a	14031212
Exp. 3	B	DOR	4	slow_regular	9	c2	3a_50	0	1.357	0.858	14.2	0.268	0.937	-0.065	A3	3a	14031212
Exp. 3	B	DOR	4	slow_regular	9	d2	3a_51	0	0.052	0.033	96.7	0.122	0.427	-0.851	A4	3a	14031212
Exp. 3	B	DOR	4	slow_regular	9	e2	3a_52	0	1.243	0.786	21.4	0.264	0.923	-0.08	A5	3a	14031212
Exp. 3	B	DOR	4	slow_regular	9	f2	3a_53	0	1.488	0.941	5.9	0.349	1.22	0.199	A6	3a	14031212
Exp. 3	B	DOR	4	slow_regular	9	a2	3b_48	0	0.249	0.161	83.9	0.207	0.716	-0.334	A1	3b	1403101
Exp. 3	B	DOR	4	slow_regular	9	b2	3b_49	0	0.857	0.554	44.6	0.251	0.869	-0.14	A2	3b	1403101
Exp. 3	B	DOR	4	slow_regular	9	c2	3b_50	0	1.291	0.835	16.5	0.267	0.924	-0.079	A3	3b	1403101
Exp. 3	B	DOR	4	slow_regular	9	d2	3b_51	0	0.388	0.251	74.9	0.234	0.81	-0.211	A4	3b	1403101
Exp. 3	B	DOR	4	slow_regular	9	e2	3b_52	0	1.148	0.743	25.7	0.254	0.879	-0.129	A5	3b	1403101
Exp. 3	B	DOR	4	slow_regular	9	f2	3b_53	0	1.23	0.796	20.4	0.266	0.92	-0.083	A6	3b	1403101
Exp. 3	C	CEF	4	slow_regular	10	a2	3a_54	0	1.526	0.965	3.5	0.315	1.101	0.096	A7	3a	14031212
Exp. 3	C	CEF	4	slow_regular	10	b2	3a_55	0	1.519	0.96	4	0.295	1.031	0.031	A8	3a	14031212
Exp. 3	C	CEF	4	slow_regular	10	c2	3a_56	0	1.458	0.922	7.8	0.283	0.99	-0.01	A9	3a	14031212
Exp. 3	C	CEF	4	slow_regular	10	d2	3a_57	1	-0.029	-0.018	101.8	0.077	0.269	-1.313	A10	3a	14031212
Exp. 3	C	CEF	4	slow_regular	10	e2	3a_58	0	1.529	0.966	3.4	0.275	0.962	-0.039	A11	3a	14031212
Exp. 3	C	CEF	4	slow_regular	10	f2	3a_59	0	0.498	0.315	68.5	0.214	0.748	-0.29	A12	3a	14031212
Exp. 3	C	CEF	4	slow_regular	10	a2	3b_54	0	1.246	0.806	19.4	0.262	0.907	-0.098	A7	3b	1403101
Exp. 3	C	CEF	4	slow_regular	10	b2	3b_55	0	1.466	0.948	5.2	0.277	0.958	-0.043	A8	3b	1403101
Exp. 3	C	CEF	4	slow_regular	10	c2	3b_56	0	1.478	0.956	4.4	0.279	0.965	-0.036	A9	3b	1403101
Exp. 3	C	CEF	4	slow_regular	10	d2	3b_57	1	-0.007	-0.005	100.5	0.08	0.277	-1.284	A10	3b	1403101
Exp. 3	B	DOR	4	random	11	a2	3a_60	0	1.544	0.976	2.4	0.29	1.014	0.014	D1	3a	14031212
Exp. 3	B	DOR	4	random	11	b2	3a_61	1	0.001	0.001	99.9	0.078	0.273	-1.298	D2	3a	14031212
Exp. 3	B	DOR	4	random	11	c2	3a_62	1	-0.02	-0.013	101.3	0.076	0.266	-1.324	D3	3a	14031212
Exp. 3	B	DOR	4	random	11	d2	3a_63	0	0.007	0.004	99.6	0.079	0.276	-1.287	D4	3a	14031212
Exp. 3	B	DOR	4	random	11	e2	3a_64	1	0.014	0.009	99.1	0.079	0.276	-1.287	D5	3a	14031212
Exp. 3	B	DOR	4	random	11	f2	3a_65	1	0.017	0.011	98.9	0.079	0.276	-1.287	D6	3a	14031212
Exp. 3	B	DOR	4	random	11	a2	3b_60	0	1.524	0.986	1.4	0.346	1.197	0.18	D1	3b	1403101
Exp. 3	B	DOR	4	random	11	b2	3b_61	1	-0.028	-0.018	101.8	0.081	0.28	-1.273	D2	3b	1403101
Exp. 3	B	DOR	4	random	11	c2	3b_62	1	-0.009	-0.006	100.6	0.083	0.287	-1.248	D3	3b	1403101
Exp. 3	B	DOR	4	random	11	d2	3b_63	0	-0.043	-0.028	102.8	0.096	0.332	-1.103	D4	3b	1403101
Exp. 3	B	DOR	4	random	11	e2	3b_64	0	0.007	0.005	99.5	0.08	0.277	-1.284	D5	3b	1403101
Exp. 3	B	DOR	4	random	11	f2	3b_65	1	0	0	100	0.083	0.287	-1.248	D6	3b	1403101
Exp. 3	B	DOR	4	random	12	a2	3a_66	0	0.573	0.362	63.8	0.181	0.633	-0.457	E1	3a	14031212
Exp. 3	B	DOR	4	random	12	b2	3a_67	0	0.006	0.004	99.6	0.08	0.28	-1.273	E2	3a	14031212
Exp. 3	B	DOR	4	random	12	c2	3a_68	0	1.014	0.641	35.9	0.206	0.72	-0.329	E3	3a	14031212
Exp. 3	B	DOR	4	random	12	d2	3a_69	1	0.046	0.029	97.1	0.084	0.294	-1.224	E4	3a	14031212
Exp. 3	B	DOR	4	random	12	e2	3a_70	0	0.88	0.556	44.4	0.232	0.811	-0.209	E5	3a	14031212
Exp. 3	B	DOR	4	random	12	f2	3a_71	1	0.072	0.046	95.4	0.083	0.29	-1.238	E6	3a	14031212
Exp. 3	B	DOR	4	random	12	a2	3b_66	0	0.627	0.406	59.4	0.196	0.678	-0.389	E1	3b	1403101
Exp. 3	B	DOR	4	random	12	b2	3b_67	0	-0.003	-0.002	100.2	0.079	0.273	-1.298	E2	3b	1403101
Exp. 3	B	DOR	4	random	12	c2	3b_68	0	-0.015	-0.01	101	0.076	0.263	-1.336	E3	3b	1403101
Exp. 3	B	DOR	4	random	12	d2	3b_69	1	-0.024	-0.016	101.6	0.084	0.291	-1.234	E4	3b	1403101
Exp. 3	B	DOR	4	random	12	e2	3b_70	1	-0.036	-0.023	102.3	0.075	0.26	-1.347	E5	3b	1403101
Exp. 3	B	DOR	4	random	12	f2	3b_71	1	-0.058	-0.038	103.8	0.078	0.27	-1.309	E6	3b	1403101
Exp. 3	B	DOR	4	random	13	a2	3a_72	0	0.143	0.09	91	0.202	0.706	-0.348	G1	3a	14031212
Exp. 3	B	DOR	4	random	13	b2	3a_73	0	-0.03	-0.019	101.9	0.084	0.294	-1.224	G2	3a	14031212
Exp. 3	B	DOR	4	random	13	c2	3a_74	1	0.008	0.005	99.5	0.083	0.29	-1.238	G3	3a	14031212
Exp. 3	B	DOR	4	random	13	d2	3a_75	0	1.424	0.9	10	0.308	1.077	0.074	G4	3a	14031212
Exp. 3	B	DOR	4	random	13	e2	3a_76	0	0.265	0.168	83.2	0.21	0.734	-0.309	G5	3a	14031212
Exp. 3	B	DOR	4	random	13	f2	3a_77	1	-0.024	-0.015	101.5	0.082	0.287	-1.248	G6	3a	14031212
Exp. 3	B	DOR	4	random	13	a2	3b_72	0	0.048	0.031	96.9	0.123	0.426	-0.853	G1	3b	1403101
Exp. 3	B	DOR	4	random	13	b2	3b_73	1	-0.032	-0.021	102.1	0.078	0.27	-1.309	G2	3b	1403101
Exp. 3	B	DOR	4	random	13	c2	3b_74	0	0.068	0.044	95.6	0.093	0.322	-1.133	G3	3b	1403101
Exp. 3	B	DOR	4	random	13	d2	3b_75	0	1.258	0.814	18.6	0.299	1.035	0.034	G4	3b	1403101
Exp. 3	B	DOR	4	random	13	e2	3b_76	0	0.653	0.422	57.8	0.291	1.007	0.007	G5	3b	1403101
Exp. 3	B	DOR	4	random	13	f2	3b_77	1	0.003	0.002	99.8	0.083	0.287	-1.248	G6	3b	1403101
Exp. 3	C	CEF	4	random	14	a2	3a_78	0	1.438	0.909	9.1	0.272	0.951	-0.05	C7	3a	14031212
Exp. 3	C	CEF	4	random	14	b2	3a_79	1	-0.035	-0.022	102.2	0.082	0.287	-1.248	C8	3a	14031212
Exp. 3	C	CEF	4	random	14	c2	3a_80	0	0.431	0.272	72.8	0.263	0.92	-0.083	C9	3a	14031212
Exp. 3	C	CEF	4	random	14	d2	3a_81	0	1.373	0.868	13.2	0.287	1.003	0.003	C10	3a	14031212
Exp. 3	C	CEF	4	random	14	e2	3a_82	1	0.011	0.007	99.3	0.087	0.304	-1.191	C11	3a	14031212
Exp. 3	C	CEF	4	random	14	f2	3a_83	0	-0.012	-0.008	100.8	0.078	0.273	-1.298	C12	3a	14031212
Exp. 3	C	CEF	4	random	14	a2	3b_78	0	1.295	0.838	16.2	0.253	0.875	-0.134	C7	3b	1403101
Exp. 3	C	CEF	4	random	14	b2	3b_79	1	0.028	0.018	98.2	0.081	0.28	-1.273	C8	3b	1403101
Exp. 3	C	CEF	4	random	14	c2	3b_80	0	0.488	0.316	68.4	0.269	0.931	-0.071	C9	3b	1403101
Exp. 3	C	CEF	4	random	14	d2	3b_81	0	1.271	0.822	17.8	0.289	1	0	C10	3b	1403101
Exp. 3	C	CEF	4	random	14	e2	3b_82	1	-0.015	-0.01	101	0.076	0.263	-1.336	C11	3b	1403101
Exp. 3	C	CEF	4	random	14	f2	3b_83	0	-0.217	-0.14	114	0.047	0.163	-1.814	C12	3b	1403101
Exp. 3	A	CAR	4	random	15	a2	3a_84	1	0.011	0.007	99.3	0.088	0.308	-1.178	H1	3a	14031212
Exp. 3	A	CAR	4	random	15	b2	3a_85	1	-0.012	-0.008	100.8	0.084	0.294	-1.224	H2	3a	14031212
Exp. 3	A	CAR	4	random	15	c2	3a_86	0	-0.053	-0.034	103.4	0.086	0.301	-1.201	H3	3a	14031212
Exp. 3	A	CAR	4	random	15	d2	3a_87	1	-0.01	-0.006	100.6	0.078	0.273	-1.298	H4	3a	14031212
Exp. 3	A	CAR	4	random	15	e2	3a_88	0	-0.018	-0.011	101.1	0.084	0.294	-1.224	H5	3a	14031212
Exp. 3	A	CAR	4	random	15	f2	3a_89	0	-0.032	-0.02	102	0.087	0.304	-1.191	H6	3a	14031212
Exp. 3	A	CAR	4	random	15	a2	3b_84	1	-0.009	-0.006	100.6	0.086	0.298	-1.211	H1	3b	1403101
Exp. 3	A	CAR	4	random	15	b2	3b_85	1	-0.027	-0.017	101.7	0.084	0.291	-1.234	H2	3b	1403101
Exp. 3	A	CAR	4	random	15	c2	3b_86	1	-0.003	-0.002	100.2	0.082	0.284	-1.259	H3	3b	1403101
Exp. 3	A	CAR	4	random	15	d2	3b_87	1	-0.006	-0.004	100.4	0.081	0.28	-1.273	H4	3b	1403101
Exp. 3	A	CAR	4	random	15	e2	3b_88	0	0.132	0.085	91.5	0.161	0.557	-0.585	H5	3b	1403101
Exp. 3	A	CAR	4	random	15	f2	3b_89	0	-0.001	-0.001	100.1	0.086	0.298	-1.211	H6	3b	1403101
Exp. 3	A	CAR	4	random	16	a2	3a_90	0	1.415	0.894	10.6	0.298	1.042	0.041	H7	3a	14031212
Exp. 3	A	CAR	4	random	16	b2	3a_91	0	0.778	0.492	50.8	0.16	0.559	-0.582	H8	3a	14031212
Exp. 3	A	CAR	4	random	16	c2	3a_92	0	0.765	0.484	51.6	0.166	0.58	-0.545	H9	3a	14031212
Exp. 3	A	CAR	4	random	16	d2	3a_93	1	-0.018	-0.011	101.1	0.078	0.273	-1.298	H10	3a	14031212
Exp. 3	A	CAR	4	random	16	e2	3a_94	0	0.973	0.615	38.5	0.175	0.612	-0.491	H11	3a	14031212
Exp. 3	A	CAR	4	random	16	f2	3a_95	0	0.079	0.05	95	0.08	0.28	-1.273	H12	3a	14031212
Exp. 3	A	CAR	4	random	16	a2	3b_90	0	1.272	0.823	17.7	0.302	1.045	0.044	H7	3b	1403101
Exp. 3	A	CAR	4	random	16	b2	3b_91	0	1.014	0.656	34.4	0.181	0.626	-0.468	H8	3b	1403101
Exp. 3	A	CAR	4	random	16	c2	3b_92	0	0.762	0.493	50.7	0.191	0.661	-0.414	H9	3b	1403101
Exp. 3	A	CAR	4	random	16	d2	3b_93	1	-0.017	-0.011	101.1	0.087	0.301	-1.201	H10	3b	1403101
Exp. 3	A	CAR	4	random	16	e2	3b_94	0	0.891	0.576	42.4	0.184	0.637	-0.451	H11	3b	1403101
Exp. 3	A	CAR	4	random	16	f2	3b_95	1	0.05	0.032	96.8	0.083	0.287	-1.248	H12	3b	1403101
Exp. 3	A	CAR	5	mono	1	a2	3a_1	0	1.076	0.677	32.3	0.215	0.749	-0.289	G7	3a	14031212
Exp. 3	A	CAR	5	mono	1	b2	3a_2	0	0.721	0.454	54.6	0.206	0.718	-0.331	G8	3a	14031212
Exp. 3	A	CAR	5	mono	1	c2	3a_3	0	1.391	0.875	12.5	0.265	0.923	-0.08	G9	3a	14031212
Exp. 3	A	CAR	5	mono	1	d2	3a_4	0	1.537	0.967	3.3	0.276	0.962	-0.039	G10	3a	14031212
Exp. 3	A	CAR	5	mono	1	e2	3a_5	1	-0.057	-0.036	103.6	0.073	0.254	-1.37	G11	3a	14031212
Exp. 3	A	CAR	5	mono	1	f2	3a_6	0	0.847	0.533	46.7	0.207	0.721	-0.327	G12	3a	14031212
Exp. 3	A	CAR	5	mono	1	a2	3b_1	0	1.075	0.661	33.9	0.219	0.74	-0.301	G7	3b	1403101
Exp. 3	A	CAR	5	mono	1	b2	3b_2	0	0.319	0.196	80.4	0.156	0.527	-0.641	G8	3b	1403101
Exp. 3	A	CAR	5	mono	1	c2	3b_3	0	1.294	0.796	20.4	0.253	0.855	-0.157	G9	3b	1403101
Exp. 3	A	CAR	5	mono	1	d2	3b_4	0	1.553	0.955	4.5	0.284	0.959	-0.042	G10	3b	1403101
Exp. 3	A	CAR	5	mono	1	e2	3b_5	0	0.399	0.245	75.5	0.172	0.581	-0.543	G11	3b	1403101
Exp. 3	A	CAR	5	mono	1	f2	3b_6	0	0.588	0.362	63.8	0.151	0.51	-0.673	G12	3b	1403101
Exp. 3	B	DOR	5	mono	2	d2	3a_10	0	0.125	0.079	92.1	0.125	0.436	-0.83	B4	3a	14031212
Exp. 3	B	DOR	5	mono	2	e2	3a_11	0	1.212	0.763	23.7	0.244	0.85	-0.163	B5	3a	14031212
Exp. 3	B	DOR	5	mono	2	f2	3a_12	0	1.389	0.874	12.6	0.268	0.934	-0.068	B6	3a	14031212
Exp. 3	B	DOR	5	mono	2	a2	3a_7	0	0.762	0.48	52	0.231	0.805	-0.217	B1	3a	14031212
Exp. 3	B	DOR	5	mono	2	b2	3a_8	0	1.337	0.841	15.9	0.276	0.962	-0.039	B2	3a	14031212
Exp. 3	B	DOR	5	mono	2	c2	3a_9	0	1.448	0.911	8.9	0.269	0.937	-0.065	B3	3a	14031212
Exp. 3	B	DOR	5	mono	2	d2	3b_10	0	0.598	0.368	63.2	0.23	0.777	-0.252	B4	3b	1403101
Exp. 3	B	DOR	5	mono	2	e2	3b_11	0	1.174	0.722	27.8	0.246	0.831	-0.185	B5	3b	1403101
Exp. 3	B	DOR	5	mono	2	f2	3b_12	0	1.326	0.815	18.5	0.302	1.02	0.02	B6	3b	1403101
Exp. 3	B	DOR	5	mono	2	a2	3b_7	0	0.701	0.431	56.9	0.216	0.73	-0.315	B1	3b	1403101
Exp. 3	B	DOR	5	mono	2	b2	3b_8	0	1.169	0.719	28.1	0.256	0.865	-0.145	B2	3b	1403101
Exp. 3	B	DOR	5	mono	2	c2	3b_9	0	1.246	0.766	23.4	0.262	0.885	-0.122	B3	3b	1403101
Exp. 3	C	CEF	5	mono	3	a2	3a_13	0	1.229	0.773	22.7	0.261	0.909	-0.095	E7	3a	14031212
Exp. 3	C	CEF	5	mono	3	b2	3a_14	0	1.437	0.904	9.6	0.268	0.934	-0.068	E8	3a	14031212
Exp. 3	C	CEF	5	mono	3	c2	3a_15	0	1.376	0.866	13.4	0.266	0.927	-0.076	E9	3a	14031212
Exp. 3	C	CEF	5	mono	3	d2	3a_16	0	0.427	0.269	73.1	0.204	0.711	-0.341	E10	3a	14031212
Exp. 3	C	CEF	5	mono	3	e2	3a_17	0	1.487	0.936	6.4	0.273	0.951	-0.05	E11	3a	14031212
Exp. 3	C	CEF	5	mono	3	f2	3a_18	0	0.782	0.492	50.8	0.223	0.777	-0.252	E12	3a	14031212
Exp. 3	C	CEF	5	mono	3	a2	3b_13	0	1.272	0.782	21.8	0.263	0.889	-0.118	E7	3b	1403101
Exp. 3	C	CEF	5	mono	3	b2	3b_14	0	1.478	0.909	9.1	0.267	0.902	-0.103	E8	3b	1403101
Exp. 3	C	CEF	5	mono	3	c2	3b_15	0	1.423	0.875	12.5	0.257	0.868	-0.142	E9	3b	1403101
Exp. 3	C	CEF	5	mono	3	d2	3b_16	1	-0.012	-0.007	100.7	0.074	0.25	-1.386	E10	3b	1403101
Exp. 3	C	CEF	5	mono	3	e2	3b_17	0	1.404	0.863	13.7	0.268	0.905	-0.1	E11	3b	1403101
Exp. 3	C	CEF	5	mono	3	f2	3b_18	0	0.854	0.525	47.5	0.241	0.814	-0.206	E12	3b	1403101
Exp. 3	B	DOR	5	fast_regular	5	a2	3a_24	0	1.542	0.97	3	0.31	1.08	0.077	D1	3a	14031212
Exp. 3	B	DOR	5	fast_regular	5	b2	3a_25	1	-0.012	-0.008	100.8	0.083	0.289	-1.241	D2	3a	14031212
Exp. 3	B	DOR	5	fast_regular	5	c2	3a_26	1	0.016	0.01	99	0.076	0.265	-1.328	D3	3a	14031212
Exp. 3	B	DOR	5	fast_regular	5	d2	3a_27	0	1.087	0.684	31.6	0.239	0.833	-0.183	D4	3a	14031212
Exp. 3	B	DOR	5	fast_regular	5	e2	3a_28	1	-0.017	-0.011	101.1	0.077	0.268	-1.317	D5	3a	14031212
Exp. 3	B	DOR	5	fast_regular	5	f2	3a_29	1	0.015	0.009	99.1	0.079	0.275	-1.291	D6	3a	14031212
Exp. 3	B	DOR	5	fast_regular	5	a2	3b_24	0	1.394	0.857	14.3	0.283	0.956	-0.045	D1	3b	1403101
Exp. 3	B	DOR	5	fast_regular	5	b2	3b_25	1	0.022	0.014	98.6	0.088	0.297	-1.214	D2	3b	1403101
Exp. 3	B	DOR	5	fast_regular	5	c2	3b_26	0	-0.041	-0.025	102.5	0.082	0.277	-1.284	D3	3b	1403101
Exp. 3	B	DOR	5	fast_regular	5	d2	3b_27	0	1.147	0.705	29.5	0.222	0.75	-0.288	D4	3b	1403101
Exp. 3	B	DOR	5	fast_regular	5	e2	3b_28	0	0	0	100	0.083	0.28	-1.273	D5	3b	1403101
Exp. 3	B	DOR	5	fast_regular	5	f2	3b_29	1	-0.039	-0.024	102.4	0.075	0.253	-1.374	D6	3b	1403101
Exp. 3	A	CAR	5	fast_regular	6	a2	3a_30	0	1.24	0.78	22	0.273	0.951	-0.05	B7	3a	14031212
Exp. 3	A	CAR	5	fast_regular	6	b2	3a_31	0	0.039	0.025	97.5	0.081	0.282	-1.266	B8	3a	14031212
Exp. 3	A	CAR	5	fast_regular	6	c2	3a_32	1	-0.012	-0.008	100.8	0.077	0.268	-1.317	B9	3a	14031212
Exp. 3	A	CAR	5	fast_regular	6	d2	3a_33	0	-0.047	-0.03	103	0.079	0.275	-1.291	B10	3a	14031212
Exp. 3	A	CAR	5	fast_regular	6	e2	3a_34	1	0.004	0.003	99.7	0.09	0.314	-1.158	B11	3a	14031212
Exp. 3	A	CAR	5	fast_regular	6	f2	3a_35	1	-0.06	-0.038	103.8	0.084	0.293	-1.228	B12	3a	14031212
Exp. 3	A	CAR	5	fast_regular	6	a2	3b_30	0	1.126	0.692	30.8	0.27	0.912	-0.092	B7	3b	1403101
Exp. 3	A	CAR	5	fast_regular	6	b2	3b_31	0	0.046	0.028	97.2	0.083	0.28	-1.273	B8	3b	1403101
Exp. 3	A	CAR	5	fast_regular	6	c2	3b_32	1	-0.073	-0.045	104.5	0.073	0.247	-1.398	B9	3b	1403101
Exp. 3	A	CAR	5	fast_regular	6	d2	3b_33	1	0.011	0.007	99.3	0.076	0.257	-1.359	B10	3b	1403101
Exp. 3	A	CAR	5	fast_regular	6	e2	3b_34	0	1.473	0.906	9.4	0.315	1.064	0.062	B11	3b	1403101
Exp. 3	A	CAR	5	fast_regular	7	a2	3a_36	0	1.157	0.728	27.2	0.267	0.93	-0.073	F1	3a	14031212
Exp. 3	A	CAR	5	fast_regular	7	b2	3a_37	0	1.109	0.698	30.2	0.182	0.634	-0.456	F2	3a	14031212
Exp. 3	A	CAR	5	fast_regular	7	c2	3a_38	0	0.005	0.003	99.7	0.09	0.314	-1.158	F3	3a	14031212
Exp. 3	A	CAR	5	fast_regular	7	d2	3a_39	0	1.242	0.782	21.8	0.227	0.791	-0.234	F4	3a	14031212
Exp. 3	A	CAR	5	fast_regular	7	e2	3a_40	0	0.961	0.605	39.5	0.182	0.634	-0.456	F5	3a	14031212
Exp. 3	A	CAR	5	fast_regular	7	f2	3a_41	0	-0.037	-0.023	102.3	0.083	0.289	-1.241	F6	3a	14031212
Exp. 3	A	CAR	5	fast_regular	7	a2	3b_36	0	1.301	0.8	20	0.297	1.003	0.003	F1	3b	1403101
Exp. 3	A	CAR	5	fast_regular	7	b2	3b_37	1	-0.024	-0.015	101.5	0.084	0.284	-1.259	F2	3b	1403101
Exp. 3	A	CAR	5	fast_regular	7	c2	3b_38	1	0.016	0.01	99	0.085	0.287	-1.248	F3	3b	1403101
Exp. 3	A	CAR	5	fast_regular	7	d2	3b_39	1	-0.016	-0.01	101	0.082	0.277	-1.284	F4	3b	1403101
Exp. 3	A	CAR	5	fast_regular	7	e2	3b_40	0	1.253	0.771	22.9	0.243	0.821	-0.197	F5	3b	1403101
Exp. 3	A	CAR	5	fast_regular	7	f2	3b_41	1	0.007	0.004	99.6	0.075	0.253	-1.374	F6	3b	1403101
Exp. 3	B	DOR	5	slow_regular	8	a2	3a_42	0	1.402	0.882	11.8	0.284	0.99	-0.01	C1	3a	14031212
Exp. 3	B	DOR	5	slow_regular	8	b2	3a_43	0	0.356	0.224	77.6	0.138	0.481	-0.732	C2	3a	14031212
Exp. 3	B	DOR	5	slow_regular	8	c2	3a_44	0	0.992	0.624	37.6	0.203	0.707	-0.347	C3	3a	14031212
Exp. 3	B	DOR	5	slow_regular	8	d2	3a_45	0	0.97	0.61	39	0.223	0.777	-0.252	C4	3a	14031212
Exp. 3	B	DOR	5	slow_regular	8	e2	3a_46	0	0.27	0.17	83	0.114	0.397	-0.924	C5	3a	14031212
Exp. 3	B	DOR	5	slow_regular	8	f2	3a_47	0	0.297	0.187	81.3	0.133	0.463	-0.77	C6	3a	14031212
Exp. 3	B	DOR	5	slow_regular	8	a2	3b_42	0	1.322	0.813	18.7	0.284	0.959	-0.042	C1	3b	1403101
Exp. 3	B	DOR	5	slow_regular	8	b2	3b_43	0	0.262	0.161	83.9	0.122	0.412	-0.887	C2	3b	1403101
Exp. 3	B	DOR	5	slow_regular	8	c2	3b_44	0	0.899	0.553	44.7	0.192	0.649	-0.432	C3	3b	1403101
Exp. 3	B	DOR	5	slow_regular	8	d2	3b_45	0	0.76	0.467	53.3	0.191	0.645	-0.439	C4	3b	1403101
Exp. 3	B	DOR	5	slow_regular	8	e2	3b_46	0	0.034	0.021	97.9	0.091	0.307	-1.181	C5	3b	1403101
Exp. 3	B	DOR	5	slow_regular	8	f2	3b_47	0	0.215	0.132	86.8	0.133	0.449	-0.801	C6	3b	1403101
Exp. 3	A	CAR	5	slow_regular	9	a2	3a_48	0	0.487	0.306	69.4	0.155	0.54	-0.616	A1	3a	14031212
Exp. 3	A	CAR	5	slow_regular	9	b2	3a_49	0	1.115	0.702	29.8	0.228	0.794	-0.231	A2	3a	14031212
Exp. 3	A	CAR	5	slow_regular	9	c2	3a_50	0	1.222	0.769	23.1	0.265	0.923	-0.08	A3	3a	14031212
Exp. 3	A	CAR	5	slow_regular	9	d2	3a_51	0	0.409	0.257	74.3	0.137	0.477	-0.74	A4	3a	14031212
Exp. 3	A	CAR	5	slow_regular	9	e2	3a_52	0	1.237	0.778	22.2	0.268	0.934	-0.068	A5	3a	14031212
Exp. 3	A	CAR	5	slow_regular	9	f2	3a_53	0	1.138	0.716	28.4	0.253	0.882	-0.126	A6	3a	14031212
Exp. 3	A	CAR	5	slow_regular	9	a2	3b_48	0	0.855	0.526	47.4	0.225	0.76	-0.274	A1	3b	1403101
Exp. 3	A	CAR	5	slow_regular	9	b2	3b_49	0	0.785	0.483	51.7	0.154	0.52	-0.654	A2	3b	1403101
Exp. 3	A	CAR	5	slow_regular	9	c2	3b_50	0	1.041	0.64	36	0.247	0.834	-0.182	A3	3b	1403101
Exp. 3	A	CAR	5	slow_regular	9	d2	3b_51	0	1.004	0.617	38.3	0.171	0.578	-0.548	A4	3b	1403101
Exp. 3	A	CAR	5	slow_regular	9	e2	3b_52	0	1.107	0.681	31.9	0.274	0.926	-0.077	A5	3b	1403101
Exp. 3	A	CAR	5	slow_regular	9	f2	3b_53	0	0.98	0.603	39.7	0.161	0.544	-0.609	A6	3b	1403101
Exp. 3	A	CAR	5	slow_regular	10	a2	3a_54	0	1.141	0.718	28.2	0.262	0.913	-0.091	A7	3a	14031212
Exp. 3	A	CAR	5	slow_regular	10	b2	3a_55	0	1.075	0.677	32.3	0.224	0.78	-0.248	A8	3a	14031212
Exp. 3	A	CAR	5	slow_regular	10	c2	3a_56	0	1.091	0.687	31.3	0.214	0.746	-0.293	A9	3a	14031212
Exp. 3	A	CAR	5	slow_regular	10	d2	3a_57	1	-0.014	-0.009	100.9	0.077	0.268	-1.317	A10	3a	14031212
Exp. 3	A	CAR	5	slow_regular	10	e2	3a_58	0	1.045	0.658	34.2	0.228	0.794	-0.231	A11	3a	14031212
Exp. 3	A	CAR	5	slow_regular	10	f2	3a_59	0	0.26	0.164	83.6	0.133	0.463	-0.77	A12	3a	14031212
Exp. 3	A	CAR	5	slow_regular	10	a2	3b_54	0	0.88	0.541	45.9	0.26	0.878	-0.13	A7	3b	1403101
Exp. 3	A	CAR	5	slow_regular	10	b2	3b_55	0	1.156	0.711	28.9	0.218	0.736	-0.307	A8	3b	1403101
Exp. 3	A	CAR	5	slow_regular	10	c2	3b_56	0	0.941	0.579	42.1	0.219	0.74	-0.301	A9	3b	1403101
Exp. 3	A	CAR	5	slow_regular	10	d2	3b_57	1	0.027	0.017	98.3	0.099	0.334	-1.097	A10	3b	1403101
Exp. 3	A	CAR	5	random	11	a2	3a_60	0	1.235	0.777	22.3	0.246	0.857	-0.154	C7	3a	14031212
Exp. 3	A	CAR	5	random	11	b2	3a_61	1	-0.034	-0.021	102.1	0.083	0.289	-1.241	C8	3a	14031212
Exp. 3	A	CAR	5	random	11	c2	3a_62	1	-0.005	-0.003	100.3	0.079	0.275	-1.291	C9	3a	14031212
Exp. 3	A	CAR	5	random	11	d2	3a_63	0	0.13	0.082	91.8	0.203	0.707	-0.347	C10	3a	14031212
Exp. 3	A	CAR	5	random	11	e2	3a_64	1	-0.005	-0.003	100.3	0.073	0.254	-1.37	C11	3a	14031212
Exp. 3	A	CAR	5	random	11	f2	3a_65	1	-0.012	-0.008	100.8	0.077	0.268	-1.317	C12	3a	14031212
Exp. 3	A	CAR	5	random	11	a2	3b_60	0	1.173	0.721	27.9	0.234	0.791	-0.234	C7	3b	1403101
Exp. 3	A	CAR	5	random	11	b2	3b_61	1	0.017	0.01	99	0.082	0.277	-1.284	C8	3b	1403101
Exp. 3	A	CAR	5	random	11	c2	3b_62	1	0.001	0.001	99.9	0.077	0.26	-1.347	C9	3b	1403101
Exp. 3	A	CAR	5	random	11	d2	3b_63	0	0.901	0.554	44.6	0.318	1.074	0.071	C10	3b	1403101
Exp. 3	A	CAR	5	random	11	e2	3b_64	0	-0.086	-0.053	105.3	0.07	0.236	-1.444	C11	3b	1403101
Exp. 3	A	CAR	5	random	11	f2	3b_65	1	-0.03	-0.018	101.8	0.089	0.301	-1.201	C12	3b	1403101
Exp. 3	C	CEF	5	random	12	a2	3a_66	0	0.987	0.621	37.9	0.229	0.798	-0.226	E1	3a	14031212
Exp. 3	C	CEF	5	random	12	b2	3a_67	0	0.016	0.01	99	0.097	0.338	-1.085	E2	3a	14031212
Exp. 3	C	CEF	5	random	12	c2	3a_68	0	0.763	0.48	52	0.275	0.958	-0.043	E3	3a	14031212
Exp. 3	C	CEF	5	random	12	d2	3a_69	1	0.041	0.026	97.4	0.091	0.317	-1.149	E4	3a	14031212
Exp. 3	C	CEF	5	random	12	e2	3a_70	0	1.491	0.938	6.2	0.32	1.115	0.109	E5	3a	14031212
Exp. 3	C	CEF	5	random	12	f2	3a_71	1	0.013	0.008	99.2	0.087	0.303	-1.194	E6	3a	14031212
Exp. 3	C	CEF	5	random	12	a2	3b_66	0	1.104	0.679	32.1	0.255	0.861	-0.15	E1	3b	1403101
Exp. 3	C	CEF	5	random	12	b2	3b_67	0	0.067	0.041	95.9	0.116	0.392	-0.936	E2	3b	1403101
Exp. 3	C	CEF	5	random	12	c2	3b_68	0	-0.01	-0.006	100.6	0.079	0.267	-1.321	E3	3b	1403101
Exp. 3	C	CEF	5	random	12	d2	3b_69	1	-0.059	-0.036	103.6	0.08	0.27	-1.309	E4	3b	1403101
Exp. 3	C	CEF	5	random	12	e2	3b_70	1	-0.017	-0.01	101	0.075	0.253	-1.374	E5	3b	1403101
Exp. 3	C	CEF	5	random	12	f2	3b_71	1	-0.033	-0.02	102	0.073	0.247	-1.398	E6	3b	1403101
Exp. 3	B	DOR	5	random	13	a2	3a_72	0	1.472	0.926	7.4	0.343	1.195	0.178	G1	3a	14031212
Exp. 3	B	DOR	5	random	13	b2	3a_73	0	0.894	0.563	43.7	0.295	1.028	0.028	G2	3a	14031212
Exp. 3	B	DOR	5	random	13	c2	3a_74	1	-0.028	-0.018	101.8	0.073	0.254	-1.37	G3	3a	14031212
Exp. 3	B	DOR	5	random	13	d2	3a_75	0	1.633	1.028	-2.8	0.284	0.99	-0.01	G4	3a	14031212
Exp. 3	B	DOR	5	random	13	e2	3a_76	0	1.149	0.723	27.7	0.241	0.84	-0.174	G5	3a	14031212
Exp. 3	B	DOR	5	random	13	f2	3a_77	1	0.013	0.008	99.2	0.075	0.261	-1.343	G6	3a	14031212
Exp. 3	B	DOR	5	random	13	a2	3b_72	0	1.118	0.688	31.2	0.283	0.956	-0.045	G1	3b	1403101
Exp. 3	B	DOR	5	random	13	b2	3b_73	1	-0.012	-0.007	100.7	0.088	0.297	-1.214	G2	3b	1403101
Exp. 3	B	DOR	5	random	13	c2	3b_74	0	0.797	0.49	51	0.296	1	0	G3	3b	1403101
Exp. 3	B	DOR	5	random	13	d2	3b_75	0	1.506	0.926	7.4	0.285	0.963	-0.038	G4	3b	1403101
Exp. 3	B	DOR	5	random	13	e2	3b_76	0	1.142	0.702	29.8	0.221	0.747	-0.292	G5	3b	1403101
Exp. 3	B	DOR	5	random	13	f2	3b_77	1	0.048	0.03	97	0.089	0.301	-1.201	G6	3b	1403101
Exp. 3	C	CEF	5	random	14	a2	3a_78	0	1.316	0.828	17.2	0.26	0.906	-0.099	D7	3a	14031212
Exp. 3	C	CEF	5	random	14	b2	3a_79	1	-0.029	-0.018	101.8	0.076	0.265	-1.328	D8	3a	14031212
Exp. 3	C	CEF	5	random	14	c2	3a_80	0	1.724	1.085	-8.5	0.302	1.052	0.051	D9	3a	14031212
Exp. 3	C	CEF	5	random	14	d2	3a_81	0	1.541	0.97	3	0.282	0.983	-0.017	D10	3a	14031212
Exp. 3	C	CEF	5	random	14	e2	3a_82	1	-0.061	-0.038	103.8	0.078	0.272	-1.302	D11	3a	14031212
Exp. 3	C	CEF	5	random	14	f2	3a_83	0	0.022	0.014	98.6	0.09	0.314	-1.158	D12	3a	14031212
Exp. 3	C	CEF	5	random	14	a2	3b_78	0	1.267	0.779	22.1	0.248	0.838	-0.177	D7	3b	1403101
Exp. 3	C	CEF	5	random	14	b2	3b_79	1	-0.009	-0.006	100.6	0.078	0.264	-1.332	D8	3b	1403101
Exp. 3	C	CEF	5	random	14	c2	3b_80	0	1.753	1.078	-7.8	0.305	1.03	0.03	D9	3b	1403101
Exp. 3	C	CEF	5	random	14	d2	3b_81	0	1.477	0.908	9.2	0.278	0.939	-0.063	D10	3b	1403101
Exp. 3	C	CEF	5	random	14	e2	3b_82	1	-0.03	-0.018	101.8	0.076	0.257	-1.359	D11	3b	1403101
Exp. 3	C	CEF	5	random	14	f2	3b_83	0	0.094	0.058	94.2	0.145	0.49	-0.713	D12	3b	1403101
Exp. 3	B	DOR	5	random	15	a2	3a_84	1	0.019	0.012	98.8	0.088	0.307	-1.181	H1	3a	14031212
Exp. 3	B	DOR	5	random	15	b2	3a_85	1	0.04	0.025	97.5	0.097	0.338	-1.085	H2	3a	14031212
Exp. 3	B	DOR	5	random	15	c2	3a_86	0	0.51	0.321	67.9	0.248	0.864	-0.146	H3	3a	14031212
Exp. 3	B	DOR	5	random	15	d2	3a_87	1	-0.029	-0.018	101.8	0.073	0.254	-1.37	H4	3a	14031212
Exp. 3	B	DOR	5	random	15	e2	3a_88	0	0.176	0.111	88.9	0.205	0.714	-0.337	H5	3a	14031212
Exp. 3	B	DOR	5	random	15	f2	3a_89	0	0.823	0.518	48.2	0.301	1.049	0.048	H6	3a	14031212
Exp. 3	B	DOR	5	random	15	a2	3b_84	1	-0.015	-0.009	100.9	0.08	0.27	-1.309	H1	3b	1403101
Exp. 3	B	DOR	5	random	15	b2	3b_85	1	0.01	0.006	99.4	0.078	0.264	-1.332	H2	3b	1403101
Exp. 3	B	DOR	5	random	15	c2	3b_86	1	-0.019	-0.012	101.2	0.076	0.257	-1.359	H3	3b	1403101
Exp. 3	B	DOR	5	random	15	d2	3b_87	1	-0.006	-0.004	100.4	0.073	0.247	-1.398	H4	3b	1403101
Exp. 3	B	DOR	5	random	15	e2	3b_88	0	1.33	0.818	18.2	0.31	1.047	0.046	H5	3b	1403101
Exp. 3	B	DOR	5	random	15	f2	3b_89	0	0.147	0.09	91	0.193	0.652	-0.428	H6	3b	1403101
Exp. 3	C	CEF	5	random	16	a2	3a_90	0	1.05	0.661	33.9	0.306	1.066	0.064	H7	3a	14031212
Exp. 3	C	CEF	5	random	16	b2	3a_91	0	0.6	0.378	62.2	0.24	0.836	-0.179	H8	3a	14031212
Exp. 3	C	CEF	5	random	16	c2	3a_92	0	0.664	0.418	58.2	0.249	0.868	-0.142	H9	3a	14031212
Exp. 3	C	CEF	5	random	16	d2	3a_93	1	-0.014	-0.009	100.9	0.084	0.293	-1.228	H10	3a	14031212
Exp. 3	C	CEF	5	random	16	e2	3a_94	0	0.696	0.438	56.2	0.245	0.854	-0.158	H11	3a	14031212
Exp. 3	C	CEF	5	random	16	f2	3a_95	0	-0.013	-0.008	100.8	0.086	0.3	-1.204	H12	3a	14031212
Exp. 3	C	CEF	5	random	16	a2	3b_90	0	1.092	0.672	32.8	0.31	1.047	0.046	H7	3b	1403101
Exp. 3	C	CEF	5	random	16	b2	3b_91	0	0.555	0.341	65.9	0.247	0.834	-0.182	H8	3b	1403101
Exp. 3	C	CEF	5	random	16	c2	3b_92	0	0.449	0.276	72.4	0.201	0.679	-0.387	H9	3b	1403101
Exp. 3	C	CEF	5	random	16	d2	3b_93	1	-0.035	-0.022	102.2	0.079	0.267	-1.321	H10	3b	1403101
Exp. 3	C	CEF	5	random	16	e2	3b_94	0	0.656	0.403	59.7	0.253	0.855	-0.157	H11	3b	1403101
Exp. 3	C	CEF	5	random	16	f2	3b_95	1	0.002	0.001	99.9	0.079	0.267	-1.321	H12	3b	1403101
Exp. 3	A	CAR	6	mono	1	a2	3a_1	0	1.023	0.707	29.3	0.227	0.811	-0.209	G7	3a	14031212
Exp. 3	A	CAR	6	mono	1	b2	3a_2	0	0.505	0.349	65.1	0.207	0.739	-0.302	G8	3a	14031212
Exp. 3	A	CAR	6	mono	1	c2	3a_3	0	1.35	0.933	6.7	0.263	0.939	-0.063	G9	3a	14031212
Exp. 3	A	CAR	6	mono	1	d2	3a_4	0	1.309	0.905	9.5	0.256	0.914	-0.09	G10	3a	14031212
Exp. 3	A	CAR	6	mono	1	e2	3a_5	1	-0.062	-0.043	104.3	0.074	0.264	-1.332	G11	3a	14031212
Exp. 3	A	CAR	6	mono	1	f2	3a_6	0	0.689	0.476	52.4	0.176	0.629	-0.464	G12	3a	14031212
Exp. 3	A	CAR	6	mono	1	a2	3b_1	0	1.095	0.748	25.2	0.227	0.817	-0.202	G7	3b	1403101
Exp. 3	A	CAR	6	mono	1	b2	3b_2	0	0.604	0.413	58.7	0.189	0.68	-0.386	G8	3b	1403101
Exp. 3	A	CAR	6	mono	1	c2	3b_3	0	1.249	0.853	14.7	0.259	0.932	-0.07	G9	3b	1403101
Exp. 3	A	CAR	6	mono	1	d2	3b_4	0	1.39	0.949	5.1	0.263	0.946	-0.056	G10	3b	1403101
Exp. 3	A	CAR	6	mono	1	e2	3b_5	0	0.494	0.337	66.3	0.181	0.651	-0.429	G11	3b	1403101
Exp. 3	A	CAR	6	mono	1	f2	3b_6	0	0.946	0.646	35.4	0.304	1.094	0.09	G12	3b	1403101
Exp. 3	B	DOR	6	mono	2	d2	3a_10	0	0.874	0.604	39.6	0.241	0.861	-0.15	B4	3a	14031212
Exp. 3	B	DOR	6	mono	2	e2	3a_11	0	1.237	0.855	14.5	0.262	0.936	-0.066	B5	3a	14031212
Exp. 3	B	DOR	6	mono	2	f2	3a_12	0	1.327	0.917	8.3	0.272	0.971	-0.029	B6	3a	14031212
Exp. 3	B	DOR	6	mono	2	a2	3a_7	0	0.733	0.507	49.3	0.209	0.746	-0.293	B1	3a	14031212
Exp. 3	B	DOR	6	mono	2	b2	3a_8	0	1.38	0.954	4.6	0.273	0.975	-0.025	B2	3a	14031212
Exp. 3	B	DOR	6	mono	2	c2	3a_9	0	1.46	1.009	-0.9	0.277	0.989	-0.011	B3	3a	14031212
Exp. 3	B	DOR	6	mono	2	d2	3b_10	0	1.032	0.705	29.5	0.235	0.845	-0.168	B4	3b	1403101
Exp. 3	B	DOR	6	mono	2	e2	3b_11	0	1.205	0.823	17.7	0.277	0.996	-0.004	B5	3b	1403101
Exp. 3	B	DOR	6	mono	2	f2	3b_12	0	1.31	0.895	10.5	0.278	1	0	B6	3b	1403101
Exp. 3	B	DOR	6	mono	2	a2	3b_7	0	0.606	0.414	58.6	0.2	0.719	-0.33	B1	3b	1403101
Exp. 3	B	DOR	6	mono	2	b2	3b_8	0	1.257	0.859	14.1	0.267	0.96	-0.041	B2	3b	1403101
Exp. 3	B	DOR	6	mono	2	c2	3b_9	0	1.307	0.893	10.7	0.272	0.978	-0.022	B3	3b	1403101
Exp. 3	C	CEF	6	mono	3	a2	3a_13	0	1.202	0.831	16.9	0.259	0.925	-0.078	E7	3a	14031212
Exp. 3	C	CEF	6	mono	3	b2	3a_14	0	1.342	0.927	7.3	0.268	0.957	-0.044	E8	3a	14031212
Exp. 3	C	CEF	6	mono	3	c2	3a_15	0	1.239	0.856	14.4	0.261	0.932	-0.07	E9	3a	14031212
Exp. 3	C	CEF	6	mono	3	d2	3a_16	0	1.22	0.843	15.7	0.246	0.879	-0.129	E10	3a	14031212
Exp. 3	C	CEF	6	mono	3	e2	3a_17	0	1.355	0.936	6.4	0.264	0.943	-0.059	E11	3a	14031212
Exp. 3	C	CEF	6	mono	3	f2	3a_18	0	0.791	0.547	45.3	0.213	0.761	-0.273	E12	3a	14031212
Exp. 3	C	CEF	6	mono	3	a2	3b_13	0	0.963	0.658	34.2	0.239	0.86	-0.151	E7	3b	1403101
Exp. 3	C	CEF	6	mono	3	b2	3b_14	0	1.351	0.923	7.7	0.265	0.953	-0.048	E8	3b	1403101
Exp. 3	C	CEF	6	mono	3	c2	3b_15	0	1.292	0.883	11.7	0.244	0.878	-0.13	E9	3b	1403101
Exp. 3	C	CEF	6	mono	3	d2	3b_16	1	-0.038	-0.026	102.6	0.07	0.252	-1.378	E10	3b	1403101
Exp. 3	C	CEF	6	mono	3	e2	3b_17	0	1.332	0.91	9	0.263	0.946	-0.056	E11	3b	1403101
Exp. 3	C	CEF	6	mono	3	f2	3b_18	0	0.819	0.559	44.1	0.223	0.802	-0.221	E12	3b	1403101
Exp. 3	C	CEF	6	fast_regular	5	a2	3a_24	0	1.307	0.903	9.7	0.258	0.921	-0.082	D7	3a	14031212
Exp. 3	C	CEF	6	fast_regular	5	b2	3a_25	1	-0.026	-0.018	101.8	0.076	0.271	-1.306	D8	3a	14031212
Exp. 3	C	CEF	6	fast_regular	5	c2	3a_26	1	-0.026	-0.018	101.8	0.086	0.307	-1.181	D9	3a	14031212
Exp. 3	C	CEF	6	fast_regular	5	d2	3a_27	0	1.287	0.889	11.1	0.274	0.979	-0.021	D10	3a	14031212
Exp. 3	C	CEF	6	fast_regular	5	e2	3a_28	1	-0.035	-0.024	102.4	0.081	0.289	-1.241	D11	3a	14031212
Exp. 3	C	CEF	6	fast_regular	5	f2	3a_29	1	-0.023	-0.016	101.6	0.078	0.279	-1.277	D12	3a	14031212
Exp. 3	C	CEF	6	fast_regular	5	a2	3b_24	0	1.288	0.88	12	0.252	0.906	-0.099	D7	3b	1403101
Exp. 3	C	CEF	6	fast_regular	5	b2	3b_25	1	-0.037	-0.025	102.5	0.076	0.273	-1.298	D8	3b	1403101
Exp. 3	C	CEF	6	fast_regular	5	c2	3b_26	0	0.069	0.047	95.3	0.144	0.518	-0.658	D9	3b	1403101
Exp. 3	C	CEF	6	fast_regular	5	d2	3b_27	0	1.289	0.88	12	0.275	0.989	-0.011	D10	3b	1403101
Exp. 3	C	CEF	6	fast_regular	5	e2	3b_28	0	0.371	0.253	74.7	0.269	0.968	-0.033	D11	3b	1403101
Exp. 3	C	CEF	6	fast_regular	5	f2	3b_29	1	-0.045	-0.031	103.1	0.086	0.309	-1.174	D12	3b	1403101
Exp. 3	C	CEF	6	fast_regular	6	a2	3a_30	0	1.299	0.898	10.2	0.256	0.914	-0.09	B7	3a	14031212
Exp. 3	C	CEF	6	fast_regular	6	b2	3a_31	0	0.114	0.079	92.1	0.158	0.564	-0.573	B8	3a	14031212
Exp. 3	C	CEF	6	fast_regular	6	c2	3a_32	1	0.001	0.001	99.9	0.081	0.289	-1.241	B9	3a	14031212
Exp. 3	C	CEF	6	fast_regular	6	d2	3a_33	0	-0.003	-0.002	100.2	0.079	0.282	-1.266	B10	3a	14031212
Exp. 3	C	CEF	6	fast_regular	6	e2	3a_34	1	0.031	0.021	97.9	0.086	0.307	-1.181	B11	3a	14031212
Exp. 3	C	CEF	6	fast_regular	6	f2	3a_35	1	-0.031	-0.021	102.1	0.08	0.286	-1.252	B12	3a	14031212
Exp. 3	C	CEF	6	fast_regular	6	a2	3b_30	0	1.26	0.861	13.9	0.267	0.96	-0.041	B7	3b	1403101
Exp. 3	C	CEF	6	fast_regular	6	b2	3b_31	0	0.035	0.024	97.6	0.082	0.295	-1.221	B8	3b	1403101
Exp. 3	C	CEF	6	fast_regular	6	c2	3b_32	1	-0.061	-0.042	104.2	0.074	0.266	-1.324	B9	3b	1403101
Exp. 3	C	CEF	6	fast_regular	6	d2	3b_33	1	-0.009	-0.006	100.6	0.081	0.291	-1.234	B10	3b	1403101
Exp. 3	C	CEF	6	fast_regular	6	e2	3b_34	0	1.685	1.151	-15.1	0.314	1.129	0.121	B11	3b	1403101
Exp. 3	B	DOR	6	fast_regular	7	a2	3a_36	0	1.14	0.788	21.2	0.254	0.907	-0.098	F1	3a	14031212
Exp. 3	B	DOR	6	fast_regular	7	b2	3a_37	0	0.153	0.106	89.4	0.184	0.657	-0.42	F2	3a	14031212
Exp. 3	B	DOR	6	fast_regular	7	c2	3a_38	0	0.031	0.021	97.9	0.082	0.293	-1.228	F3	3a	14031212
Exp. 3	B	DOR	6	fast_regular	7	d2	3a_39	0	1.434	0.991	0.9	0.276	0.986	-0.014	F4	3a	14031212
Exp. 3	B	DOR	6	fast_regular	7	e2	3a_40	0	0.119	0.082	91.8	0.152	0.543	-0.611	F5	3a	14031212
Exp. 3	B	DOR	6	fast_regular	7	f2	3a_41	0	-0.019	-0.013	101.3	0.077	0.275	-1.291	F6	3a	14031212
Exp. 3	B	DOR	6	fast_regular	7	a2	3b_36	0	1.029	0.703	29.7	0.271	0.975	-0.025	F1	3b	1403101
Exp. 3	B	DOR	6	fast_regular	7	b2	3b_37	1	-0.022	-0.015	101.5	0.073	0.263	-1.336	F2	3b	1403101
Exp. 3	B	DOR	6	fast_regular	7	c2	3b_38	1	0.016	0.011	98.9	0.081	0.291	-1.234	F3	3b	1403101
Exp. 3	B	DOR	6	fast_regular	7	d2	3b_39	1	-0.04	-0.027	102.7	0.076	0.273	-1.298	F4	3b	1403101
Exp. 3	B	DOR	6	fast_regular	7	e2	3b_40	0	0.321	0.219	78.1	0.195	0.701	-0.355	F5	3b	1403101
Exp. 3	B	DOR	6	fast_regular	7	f2	3b_41	1	-0.027	-0.018	101.8	0.071	0.255	-1.366	F6	3b	1403101
Exp. 3	B	DOR	6	slow_regular	8	a2	3a_42	0	1.53	1.057	-5.7	0.327	1.168	0.155	C1	3a	14031212
Exp. 3	B	DOR	6	slow_regular	8	b2	3a_43	0	0.106	0.073	92.7	0.166	0.593	-0.523	C2	3a	14031212
Exp. 3	B	DOR	6	slow_regular	8	c2	3a_44	0	0.808	0.558	44.2	0.206	0.736	-0.307	C3	3a	14031212
Exp. 3	B	DOR	6	slow_regular	8	d2	3a_45	0	0.786	0.543	45.7	0.21	0.75	-0.288	C4	3a	14031212
Exp. 3	B	DOR	6	slow_regular	8	e2	3a_46	0	0.055	0.038	96.2	0.119	0.425	-0.856	C5	3a	14031212
Exp. 3	B	DOR	6	slow_regular	8	f2	3a_47	0	0.204	0.141	85.9	0.171	0.611	-0.493	C6	3a	14031212
Exp. 3	B	DOR	6	slow_regular	8	a2	3b_42	0	1.538	1.051	-5.1	0.33	1.187	0.171	C1	3b	1403101
Exp. 3	B	DOR	6	slow_regular	8	b2	3b_43	0	0.053	0.036	96.4	0.115	0.414	-0.882	C2	3b	1403101
Exp. 3	B	DOR	6	slow_regular	8	c2	3b_44	0	0.603	0.412	58.8	0.191	0.687	-0.375	C3	3b	1403101
Exp. 3	B	DOR	6	slow_regular	8	d2	3b_45	0	0.716	0.489	51.1	0.21	0.755	-0.281	C4	3b	1403101
Exp. 3	B	DOR	6	slow_regular	8	e2	3b_46	0	0.004	0.003	99.7	0.091	0.327	-1.118	C5	3b	1403101
Exp. 3	B	DOR	6	slow_regular	8	f2	3b_47	0	0.309	0.211	78.9	0.163	0.586	-0.534	C6	3b	1403101
Exp. 3	A	CAR	6	slow_regular	9	a2	3a_48	0	0.041	0.028	97.2	0.092	0.329	-1.112	A1	3a	14031212
Exp. 3	A	CAR	6	slow_regular	9	b2	3a_49	0	0.131	0.091	90.9	0.101	0.361	-1.019	A2	3a	14031212
Exp. 3	A	CAR	6	slow_regular	9	c2	3a_50	0	-0.027	-0.019	101.9	0.093	0.332	-1.103	A3	3a	14031212
Exp. 3	A	CAR	6	slow_regular	9	d2	3a_51	0	0.021	0.015	98.5	0.083	0.296	-1.217	A4	3a	14031212
Exp. 3	A	CAR	6	slow_regular	9	e2	3a_52	0	0.056	0.039	96.1	0.094	0.336	-1.091	A5	3a	14031212
Exp. 3	A	CAR	6	slow_regular	9	f2	3a_53	0	0.325	0.225	77.5	0.116	0.414	-0.882	A6	3a	14031212
Exp. 3	A	CAR	6	slow_regular	9	a2	3b_48	0	0.015	0.01	99	0.087	0.313	-1.162	A1	3b	1403101
Exp. 3	A	CAR	6	slow_regular	9	b2	3b_49	0	0.103	0.07	93	0.093	0.335	-1.094	A2	3b	1403101
Exp. 3	A	CAR	6	slow_regular	9	c2	3b_50	0	0.079	0.054	94.6	0.088	0.317	-1.149	A3	3b	1403101
Exp. 3	A	CAR	6	slow_regular	9	d2	3b_51	0	0.015	0.01	99	0.088	0.317	-1.149	A4	3b	1403101
Exp. 3	A	CAR	6	slow_regular	9	e2	3b_52	0	0.052	0.036	96.4	0.09	0.324	-1.127	A5	3b	1403101
Exp. 3	A	CAR	6	slow_regular	9	f2	3b_53	0	0.079	0.054	94.6	0.095	0.342	-1.073	A6	3b	1403101
Exp. 3	A	CAR	6	slow_regular	10	a2	3a_54	0	1.231	0.851	14.9	0.261	0.932	-0.07	A7	3a	14031212
Exp. 3	A	CAR	6	slow_regular	10	b2	3a_55	0	0.17	0.117	88.3	0.105	0.375	-0.981	A8	3a	14031212
Exp. 3	A	CAR	6	slow_regular	10	c2	3a_56	0	0.121	0.084	91.6	0.102	0.364	-1.011	A9	3a	14031212
Exp. 3	A	CAR	6	slow_regular	10	d2	3a_57	1	-0.015	-0.01	101	0.084	0.3	-1.204	A10	3a	14031212
Exp. 3	A	CAR	6	slow_regular	10	e2	3a_58	0	0.562	0.388	61.2	0.179	0.639	-0.448	A11	3a	14031212
Exp. 3	A	CAR	6	slow_regular	10	f2	3a_59	0	0.254	0.176	82.4	0.14	0.5	-0.693	A12	3a	14031212
Exp. 3	A	CAR	6	slow_regular	10	a2	3b_54	0	1.063	0.726	27.4	0.288	1.036	0.035	A7	3b	1403101
Exp. 3	A	CAR	6	slow_regular	10	b2	3b_55	0	0.068	0.046	95.4	0.094	0.338	-1.085	A8	3b	1403101
Exp. 3	A	CAR	6	slow_regular	10	c2	3b_56	0	0.028	0.019	98.1	0.089	0.32	-1.139	A9	3b	1403101
Exp. 3	A	CAR	6	slow_regular	10	d2	3b_57	1	0.002	0.001	99.9	0.078	0.281	-1.269	A10	3b	1403101
Exp. 3	C	CEF	6	random	11	a2	3a_60	0	1.186	0.82	18	0.253	0.904	-0.101	C7	3a	14031212
Exp. 3	C	CEF	6	random	11	b2	3a_61	1	-0.044	-0.03	103	0.083	0.296	-1.217	C8	3a	14031212
Exp. 3	C	CEF	6	random	11	c2	3a_62	1	-0.004	-0.003	100.3	0.079	0.282	-1.266	C9	3a	14031212
Exp. 3	C	CEF	6	random	11	d2	3a_63	0	1.634	1.129	-12.9	0.301	1.075	0.072	C10	3a	14031212
Exp. 3	C	CEF	6	random	11	e2	3a_64	1	-0.041	-0.028	102.8	0.084	0.3	-1.204	C11	3a	14031212
Exp. 3	C	CEF	6	random	11	f2	3a_65	1	-0.033	-0.023	102.3	0.081	0.289	-1.241	C12	3a	14031212
Exp. 3	C	CEF	6	random	11	a2	3b_60	0	1.151	0.786	21.4	0.237	0.853	-0.159	C7	3b	1403101
Exp. 3	C	CEF	6	random	11	b2	3b_61	1	0.001	0.001	99.9	0.082	0.295	-1.221	C8	3b	1403101
Exp. 3	C	CEF	6	random	11	c2	3b_62	1	0	0	100	0.081	0.291	-1.234	C9	3b	1403101
Exp. 3	C	CEF	6	random	11	d2	3b_63	0	1.623	1.109	-10.9	0.295	1.061	0.059	C10	3b	1403101
Exp. 3	C	CEF	6	random	11	e2	3b_64	0	-0.059	-0.04	104	0.071	0.255	-1.366	C11	3b	1403101
Exp. 3	C	CEF	6	random	11	f2	3b_65	1	0.036	0.025	97.5	0.102	0.367	-1.002	C12	3b	1403101
Exp. 3	B	DOR	6	random	12	a2	3a_66	0	0.73	0.504	49.6	0.198	0.707	-0.347	E1	3a	14031212
Exp. 3	B	DOR	6	random	12	b2	3a_67	0	0.455	0.314	68.6	0.203	0.725	-0.322	E2	3a	14031212
Exp. 3	B	DOR	6	random	12	c2	3a_68	0	1.014	0.701	29.9	0.206	0.736	-0.307	E3	3a	14031212
Exp. 3	B	DOR	6	random	12	d2	3a_69	1	0.024	0.017	98.3	0.084	0.3	-1.204	E4	3a	14031212
Exp. 3	B	DOR	6	random	12	e2	3a_70	0	0.948	0.655	34.5	0.224	0.8	-0.223	E5	3a	14031212
Exp. 3	B	DOR	6	random	12	f2	3a_71	1	-0.015	-0.01	101	0.088	0.314	-1.158	E6	3a	14031212
Exp. 3	B	DOR	6	random	12	a2	3b_66	0	0.541	0.37	63	0.182	0.655	-0.423	E1	3b	1403101
Exp. 3	B	DOR	6	random	12	b2	3b_67	0	0.623	0.426	57.4	0.219	0.788	-0.238	E2	3b	1403101
Exp. 3	B	DOR	6	random	12	c2	3b_68	0	-0.005	-0.003	100.3	0.079	0.284	-1.259	E3	3b	1403101
Exp. 3	B	DOR	6	random	12	d2	3b_69	1	-0.031	-0.021	102.1	0.077	0.277	-1.284	E4	3b	1403101
Exp. 3	B	DOR	6	random	12	e2	3b_70	1	-0.04	-0.027	102.7	0.073	0.263	-1.336	E5	3b	1403101
Exp. 3	B	DOR	6	random	12	f2	3b_71	1	-0.029	-0.02	102	0.07	0.252	-1.378	E6	3b	1403101
Exp. 3	A	CAR	6	random	13	a2	3a_72	0	0.981	0.678	32.2	0.275	0.982	-0.018	G1	3a	14031212
Exp. 3	A	CAR	6	random	13	b2	3a_73	0	0.876	0.605	39.5	0.195	0.696	-0.362	G2	3a	14031212
Exp. 3	A	CAR	6	random	13	c2	3a_74	1	0.014	0.01	99	0.091	0.325	-1.124	G3	3a	14031212
Exp. 3	A	CAR	6	random	13	d2	3a_75	0	1.269	0.877	12.3	0.23	0.821	-0.197	G4	3a	14031212
Exp. 3	A	CAR	6	random	13	e2	3a_76	0	0.808	0.558	44.2	0.175	0.625	-0.47	G5	3a	14031212
Exp. 3	A	CAR	6	random	13	f2	3a_77	1	-0.011	-0.008	100.8	0.082	0.293	-1.228	G6	3a	14031212
Exp. 3	A	CAR	6	random	13	a2	3b_72	0	1.1	0.751	24.9	0.259	0.932	-0.07	G1	3b	1403101
Exp. 3	A	CAR	6	random	13	b2	3b_73	1	-0.011	-0.008	100.8	0.078	0.281	-1.269	G2	3b	1403101
Exp. 3	A	CAR	6	random	13	c2	3b_74	0	0.945	0.645	35.5	0.205	0.737	-0.305	G3	3b	1403101
Exp. 3	A	CAR	6	random	13	d2	3b_75	0	1.277	0.872	12.8	0.24	0.863	-0.147	G4	3b	1403101
Exp. 3	A	CAR	6	random	13	e2	3b_76	0	0.765	0.523	47.7	0.139	0.5	-0.693	G5	3b	1403101
Exp. 3	A	CAR	6	random	13	f2	3b_77	1	0.031	0.021	97.9	0.093	0.335	-1.094	G6	3b	1403101
Exp. 3	A	CAR	6	random	14	a2	3a_78	0	1.199	0.829	17.1	0.237	0.846	-0.167	D1	3a	14031212
Exp. 3	A	CAR	6	random	14	b2	3a_79	1	-0.007	-0.005	100.5	0.084	0.3	-1.204	D2	3a	14031212
Exp. 3	A	CAR	6	random	14	c2	3a_80	0	1.582	1.093	-9.3	0.306	1.093	0.089	D3	3a	14031212
Exp. 3	A	CAR	6	random	14	d2	3a_81	0	1.526	1.055	-5.5	0.288	1.029	0.029	D4	3a	14031212
Exp. 3	A	CAR	6	random	14	e2	3a_82	1	-0.046	-0.032	103.2	0.083	0.296	-1.217	D5	3a	14031212
Exp. 3	A	CAR	6	random	14	f2	3a_83	0	0.427	0.295	70.5	0.218	0.779	-0.25	D6	3a	14031212
Exp. 3	A	CAR	6	random	14	a2	3b_78	0	1.186	0.81	19	0.237	0.853	-0.159	D1	3b	1403101
Exp. 3	A	CAR	6	random	14	b2	3b_79	1	-0.007	-0.005	100.5	0.08	0.288	-1.245	D2	3b	1403101
Exp. 3	A	CAR	6	random	14	c2	3b_80	0	1.457	0.995	0.5	0.279	1.004	0.004	D3	3b	1403101
Exp. 3	A	CAR	6	random	14	d2	3b_81	0	1.475	1.008	-0.8	0.279	1.004	0.004	D4	3b	1403101
Exp. 3	A	CAR	6	random	14	e2	3b_82	1	0.011	0.008	99.2	0.076	0.273	-1.298	D5	3b	1403101
Exp. 3	A	CAR	6	random	14	f2	3b_83	0	0.856	0.585	41.5	0.241	0.867	-0.143	D6	3b	1403101
Exp. 3	C	CEF	6	random	15	a2	3a_84	1	0.027	0.019	98.1	0.09	0.321	-1.136	H1	3a	14031212
Exp. 3	C	CEF	6	random	15	b2	3a_85	1	0.017	0.012	98.8	0.088	0.314	-1.158	H2	3a	14031212
Exp. 3	C	CEF	6	random	15	c2	3a_86	0	0.965	0.667	33.3	0.242	0.864	-0.146	H3	3a	14031212
Exp. 3	C	CEF	6	random	15	d2	3a_87	1	-0.012	-0.008	100.8	0.079	0.282	-1.266	H4	3a	14031212
Exp. 3	C	CEF	6	random	15	e2	3a_88	0	1.532	1.059	-5.9	0.284	1.014	0.014	H5	3a	14031212
Exp. 3	C	CEF	6	random	15	f2	3a_89	0	1.215	0.84	16	0.318	1.136	0.128	H6	3a	14031212
Exp. 3	C	CEF	6	random	15	a2	3b_84	1	0.011	0.008	99.2	0.078	0.281	-1.269	H1	3b	1403101
Exp. 3	C	CEF	6	random	15	b2	3b_85	1	0.031	0.021	97.9	0.089	0.32	-1.139	H2	3b	1403101
Exp. 3	C	CEF	6	random	15	c2	3b_86	1	0.018	0.012	98.8	0.078	0.281	-1.269	H3	3b	1403101
Exp. 3	C	CEF	6	random	15	d2	3b_87	1	-0.033	-0.023	102.3	0.084	0.302	-1.197	H4	3b	1403101
Exp. 3	C	CEF	6	random	15	e2	3b_88	0	1.26	0.861	13.9	0.275	0.989	-0.011	H5	3b	1403101
Exp. 3	C	CEF	6	random	15	f2	3b_89	0	1.541	1.053	-5.3	0.314	1.129	0.121	H6	3b	1403101
Exp. 3	A	CAR	6	random	16	a2	3a_90	0	0.862	0.596	40.4	0.273	0.975	-0.025	H7	3a	14031212
Exp. 3	A	CAR	6	random	16	b2	3a_91	0	0.793	0.548	45.2	0.168	0.6	-0.511	H8	3a	14031212
Exp. 3	A	CAR	6	random	16	c2	3a_92	0	0.967	0.668	33.2	0.205	0.732	-0.312	H9	3a	14031212
Exp. 3	A	CAR	6	random	16	d2	3a_93	1	-0.061	-0.042	104.2	0.065	0.232	-1.461	H10	3a	14031212
Exp. 3	A	CAR	6	random	16	e2	3a_94	0	0.813	0.562	43.8	0.167	0.596	-0.518	H11	3a	14031212
Exp. 3	A	CAR	6	random	16	f2	3a_95	0	0.017	0.012	98.8	0.09	0.321	-1.136	H12	3a	14031212
Exp. 3	A	CAR	6	random	16	a2	3b_90	0	1.01	0.69	31	0.284	1.022	0.022	H7	3b	1403101
Exp. 3	A	CAR	6	random	16	b2	3b_91	0	0.638	0.436	56.4	0.295	1.061	0.059	H8	3b	1403101
Exp. 3	A	CAR	6	random	16	c2	3b_92	0	0.554	0.378	62.2	0.323	1.162	0.15	H9	3b	1403101
Exp. 3	A	CAR	6	random	16	d2	3b_93	1	-0.034	-0.023	102.3	0.077	0.277	-1.284	H10	3b	1403101
Exp. 3	A	CAR	6	random	16	e2	3b_94	0	0.645	0.441	55.9	0.242	0.871	-0.138	H11	3b	1403101
Exp. 3	A	CAR	6	random	16	f2	3b_95	1	-0.018	-0.012	101.2	0.093	0.335	-1.094	H12	3b	1403101
Exp. 3	A	CAR	7	mono	1	a2	3a_1	0	1.139	0.724	27.6	0.233	0.801	-0.222	G7	3a	14031212
Exp. 3	A	CAR	7	mono	1	b2	3a_2	0	0.539	0.343	65.7	0.233	0.801	-0.222	G8	3a	14031212
Exp. 3	A	CAR	7	mono	1	c2	3a_3	0	1.367	0.869	13.1	0.268	0.921	-0.082	G9	3a	14031212
Exp. 3	A	CAR	7	mono	1	d2	3a_4	0	1.387	0.882	11.8	0.258	0.887	-0.12	G10	3a	14031212
Exp. 3	A	CAR	7	mono	1	e2	3a_5	1	-0.075	-0.048	104.8	0.073	0.251	-1.382	G11	3a	14031212
Exp. 3	A	CAR	7	mono	1	f2	3a_6	0	0.772	0.491	50.9	0.227	0.78	-0.248	G12	3a	14031212
Exp. 3	A	CAR	7	mono	1	a2	3b_1	0	1.139	0.74	26	0.227	0.752	-0.285	G7	3b	1403101
Exp. 3	A	CAR	7	mono	1	b2	3b_2	0	0.616	0.4	60	0.187	0.619	-0.48	G8	3b	1403101
Exp. 3	A	CAR	7	mono	1	c2	3b_3	0	1.358	0.882	11.8	0.267	0.884	-0.123	G9	3b	1403101
Exp. 3	A	CAR	7	mono	1	d2	3b_4	0	1.47	0.955	4.5	0.261	0.864	-0.146	G10	3b	1403101
Exp. 3	A	CAR	7	mono	1	e2	3b_5	0	0.737	0.479	52.1	0.194	0.642	-0.443	G11	3b	1403101
Exp. 3	A	CAR	7	mono	1	f2	3b_6	0	0.688	0.447	55.3	0.162	0.536	-0.624	G12	3b	1403101
Exp. 3	B	DOR	7	mono	2	d2	3a_10	0	1.036	0.659	34.1	0.23	0.79	-0.236	B4	3a	14031212
Exp. 3	B	DOR	7	mono	2	e2	3a_11	0	1.27	0.807	19.3	0.263	0.904	-0.101	B5	3a	14031212
Exp. 3	B	DOR	7	mono	2	f2	3a_12	0	1.398	0.889	11.1	0.272	0.935	-0.067	B6	3a	14031212
Exp. 3	B	DOR	7	mono	2	a2	3a_7	0	0.652	0.414	58.6	0.202	0.694	-0.365	B1	3a	14031212
Exp. 3	B	DOR	7	mono	2	b2	3a_8	0	1.328	0.844	15.6	0.273	0.938	-0.064	B2	3a	14031212
Exp. 3	B	DOR	7	mono	2	c2	3a_9	0	1.467	0.933	6.7	0.29	0.997	-0.003	B3	3a	14031212
Exp. 3	B	DOR	7	mono	2	d2	3b_10	0	0.734	0.477	52.3	0.198	0.656	-0.422	B4	3b	1403101
Exp. 3	B	DOR	7	mono	2	e2	3b_11	0	1.295	0.841	15.9	0.274	0.907	-0.098	B5	3b	1403101
Exp. 3	B	DOR	7	mono	2	f2	3b_12	0	1.365	0.887	11.3	0.276	0.914	-0.09	B6	3b	1403101
Exp. 3	B	DOR	7	mono	2	a2	3b_7	0	0.701	0.455	54.5	0.193	0.639	-0.448	B1	3b	1403101
Exp. 3	B	DOR	7	mono	2	b2	3b_8	0	1.263	0.821	17.9	0.263	0.871	-0.138	B2	3b	1403101
Exp. 3	B	DOR	7	mono	2	c2	3b_9	0	1.411	0.917	8.3	0.272	0.901	-0.104	B3	3b	1403101
Exp. 3	C	CEF	7	mono	3	a2	3a_13	0	1.228	0.781	21.9	0.257	0.883	-0.124	E7	3a	14031212
Exp. 3	C	CEF	7	mono	3	b2	3a_14	0	1.395	0.887	11.3	0.264	0.907	-0.098	E8	3a	14031212
Exp. 3	C	CEF	7	mono	3	c2	3a_15	0	1.337	0.85	15	0.261	0.897	-0.109	E9	3a	14031212
Exp. 3	C	CEF	7	mono	3	d2	3a_16	0	1.334	0.848	15.2	0.251	0.863	-0.147	E10	3a	14031212
Exp. 3	C	CEF	7	mono	3	e2	3a_17	0	1.379	0.877	12.3	0.268	0.921	-0.082	E11	3a	14031212
Exp. 3	C	CEF	7	mono	3	f2	3a_18	0	0.859	0.546	45.4	0.2	0.687	-0.375	E12	3a	14031212
Exp. 3	C	CEF	7	mono	3	a2	3b_13	0	1.113	0.723	27.7	0.245	0.811	-0.209	E7	3b	1403101
Exp. 3	C	CEF	7	mono	3	b2	3b_14	0	1.427	0.927	7.3	0.279	0.924	-0.079	E8	3b	1403101
Exp. 3	C	CEF	7	mono	3	c2	3b_15	0	1.377	0.895	10.5	0.249	0.825	-0.192	E9	3b	1403101
Exp. 3	C	CEF	7	mono	3	d2	3b_16	1	-0.024	-0.016	101.6	0.078	0.258	-1.355	E10	3b	1403101
Exp. 3	C	CEF	7	mono	3	e2	3b_17	0	1.391	0.904	9.6	0.265	0.877	-0.131	E11	3b	1403101
Exp. 3	C	CEF	7	mono	3	f2	3b_18	0	0.785	0.51	49	0.201	0.666	-0.406	E12	3b	1403101
Exp. 3	A	CAR	7	fast_regular	5	a2	3a_24	0	1.26	0.801	19.9	0.233	0.801	-0.222	D7	3a	14031212
Exp. 3	A	CAR	7	fast_regular	5	b2	3a_25	1	-0.038	-0.024	102.4	0.084	0.289	-1.241	D8	3a	14031212
Exp. 3	A	CAR	7	fast_regular	5	c2	3a_26	1	-0.009	-0.006	100.6	0.082	0.282	-1.266	D9	3a	14031212
Exp. 3	A	CAR	7	fast_regular	5	d2	3a_27	0	1.506	0.957	4.3	0.282	0.969	-0.031	D10	3a	14031212
Exp. 3	A	CAR	7	fast_regular	5	e2	3a_28	1	-0.034	-0.022	102.2	0.081	0.278	-1.28	D11	3a	14031212
Exp. 3	A	CAR	7	fast_regular	5	f2	3a_29	1	-0.014	-0.009	100.9	0.081	0.278	-1.28	D12	3a	14031212
Exp. 3	A	CAR	7	fast_regular	5	a2	3b_24	0	1.221	0.793	20.7	0.231	0.765	-0.268	D7	3b	1403101
Exp. 3	A	CAR	7	fast_regular	5	b2	3b_25	1	-0.064	-0.042	104.2	0.075	0.248	-1.394	D8	3b	1403101
Exp. 3	A	CAR	7	fast_regular	5	c2	3b_26	0	1.534	0.997	0.3	0.304	1.007	0.007	D9	3b	1403101
Exp. 3	A	CAR	7	fast_regular	5	d2	3b_27	0	1.553	1.009	-0.9	0.284	0.94	-0.062	D10	3b	1403101
Exp. 3	A	CAR	7	fast_regular	5	e2	3b_28	0	1.672	1.086	-8.6	0.303	1.003	0.003	D11	3b	1403101
Exp. 3	A	CAR	7	fast_regular	5	f2	3b_29	1	0.015	0.01	99	0.083	0.275	-1.291	D12	3b	1403101
Exp. 3	B	DOR	7	fast_regular	6	a2	3a_30	0	0.589	0.374	62.6	0.187	0.643	-0.442	C1	3a	14031212
Exp. 3	B	DOR	7	fast_regular	6	b2	3a_31	0	0.699	0.444	55.6	0.204	0.701	-0.355	C2	3a	14031212
Exp. 3	B	DOR	7	fast_regular	6	c2	3a_32	1	0.001	0.001	99.9	0.085	0.292	-1.231	C3	3a	14031212
Exp. 3	B	DOR	7	fast_regular	6	d2	3a_33	0	0.035	0.022	97.8	0.08	0.275	-1.291	C4	3a	14031212
Exp. 3	B	DOR	7	fast_regular	6	e2	3a_34	1	0.018	0.011	98.9	0.082	0.282	-1.266	C5	3a	14031212
Exp. 3	B	DOR	7	fast_regular	6	f2	3a_35	1	-0.033	-0.021	102.1	0.079	0.271	-1.306	C6	3a	14031212
Exp. 3	B	DOR	7	fast_regular	6	a2	3b_30	0	0.568	0.369	63.1	0.187	0.619	-0.48	C1	3b	1403101
Exp. 3	B	DOR	7	fast_regular	6	b2	3b_31	0	0.026	0.017	98.3	0.094	0.311	-1.168	C2	3b	1403101
Exp. 3	B	DOR	7	fast_regular	6	c2	3b_32	1	0.039	0.025	97.5	0.077	0.255	-1.366	C3	3b	1403101
Exp. 3	B	DOR	7	fast_regular	6	d2	3b_33	1	-0.006	-0.004	100.4	0.083	0.275	-1.291	C4	3b	1403101
Exp. 3	B	DOR	7	fast_regular	6	e2	3b_34	0	0.967	0.628	37.2	0.223	0.738	-0.304	C5	3b	1403101
Exp. 3	B	DOR	7	fast_regular	6	f2	3b_35	0	-0.002	-0.001	100.1	0.083	0.275	-1.291	C6	3b	1403101
Exp. 3	C	CEF	7	fast_regular	7	a2	3a_36	0	1.124	0.715	28.5	0.265	0.911	-0.093	F1	3a	14031212
Exp. 3	C	CEF	7	fast_regular	7	b2	3a_37	0	1.386	0.881	11.9	0.278	0.955	-0.046	F2	3a	14031212
Exp. 3	C	CEF	7	fast_regular	7	c2	3a_38	0	0.055	0.035	96.5	0.099	0.34	-1.079	F3	3a	14031212
Exp. 3	C	CEF	7	fast_regular	7	d2	3a_39	0	1.471	0.935	6.5	0.267	0.918	-0.086	F4	3a	14031212
Exp. 3	C	CEF	7	fast_regular	7	e2	3a_40	0	1.352	0.86	14	0.28	0.962	-0.039	F5	3a	14031212
Exp. 3	C	CEF	7	fast_regular	7	f2	3a_41	0	-0.034	-0.022	102.2	0.083	0.285	-1.255	F6	3a	14031212
Exp. 3	C	CEF	7	fast_regular	7	a2	3b_36	0	1.101	0.715	28.5	0.265	0.877	-0.131	F1	3b	1403101
Exp. 3	C	CEF	7	fast_regular	7	b2	3b_37	1	-0.029	-0.019	101.9	0.079	0.262	-1.339	F2	3b	1403101
Exp. 3	C	CEF	7	fast_regular	7	c2	3b_38	1	0.023	0.015	98.5	0.085	0.281	-1.269	F3	3b	1403101
Exp. 3	C	CEF	7	fast_regular	7	d2	3b_39	1	-0.005	-0.003	100.3	0.078	0.258	-1.355	F4	3b	1403101
Exp. 3	C	CEF	7	fast_regular	7	e2	3b_40	0	1.421	0.923	7.7	0.283	0.937	-0.065	F5	3b	1403101
Exp. 3	C	CEF	7	fast_regular	7	f2	3b_41	1	-0.041	-0.027	102.7	0.073	0.242	-1.419	F6	3b	1403101
Exp. 3	B	DOR	7	slow_regular	8	a2	3a_42	0	1.746	1.11	-11	0.358	1.23	0.207	A1	3a	14031212
Exp. 3	B	DOR	7	slow_regular	8	b2	3a_43	0	1.527	0.971	2.9	0.336	1.155	0.144	A2	3a	14031212
Exp. 3	B	DOR	7	slow_regular	8	c2	3a_44	0	0.881	0.56	44	0.237	0.814	-0.206	A3	3a	14031212
Exp. 3	B	DOR	7	slow_regular	8	d2	3a_45	0	0.913	0.58	42	0.233	0.801	-0.222	A4	3a	14031212
Exp. 3	B	DOR	7	slow_regular	8	e2	3a_46	0	1.471	0.935	6.5	0.336	1.155	0.144	A5	3a	14031212
Exp. 3	B	DOR	7	slow_regular	8	f2	3a_47	0	0.547	0.348	65.2	0.191	0.656	-0.422	A6	3a	14031212
Exp. 3	B	DOR	7	slow_regular	8	a2	3b_42	0	1.373	0.892	10.8	0.28	0.927	-0.076	A1	3b	1403101
Exp. 3	B	DOR	7	slow_regular	8	b2	3b_43	0	1.067	0.693	30.7	0.291	0.964	-0.037	A2	3b	1403101
Exp. 3	B	DOR	7	slow_regular	8	c2	3b_44	0	0.915	0.595	40.5	0.228	0.755	-0.281	A3	3b	1403101
Exp. 3	B	DOR	7	slow_regular	8	d2	3b_45	0	0.851	0.553	44.7	0.217	0.719	-0.33	A4	3b	1403101
Exp. 3	B	DOR	7	slow_regular	8	e2	3b_46	0	0.506	0.329	67.1	0.221	0.732	-0.312	A5	3b	1403101
Exp. 3	B	DOR	7	slow_regular	8	f2	3b_47	0	0.623	0.405	59.5	0.186	0.616	-0.485	A6	3b	1403101
Exp. 3	A	CAR	7	slow_regular	9	a2	3a_48	0	0.015	0.01	99	0.125	0.43	-0.844	B7	3a	14031212
Exp. 3	A	CAR	7	slow_regular	9	b2	3a_49	0	0.073	0.046	95.4	0.137	0.471	-0.753	B8	3a	14031212
Exp. 3	A	CAR	7	slow_regular	9	c2	3a_50	0	0.675	0.429	57.1	0.277	0.952	-0.049	B9	3a	14031212
Exp. 3	A	CAR	7	slow_regular	9	d2	3a_51	0	0.113	0.072	92.8	0.154	0.529	-0.637	B10	3a	14031212
Exp. 3	A	CAR	7	slow_regular	9	e2	3a_52	0	0.63	0.401	59.9	0.273	0.938	-0.064	B11	3a	14031212
Exp. 3	A	CAR	7	slow_regular	9	f2	3a_53	0	0.127	0.081	91.9	0.156	0.536	-0.624	B12	3a	14031212
Exp. 3	A	CAR	7	slow_regular	9	a2	3b_48	0	0.027	0.018	98.2	0.105	0.348	-1.056	B7	3b	1403101
Exp. 3	A	CAR	7	slow_regular	9	b2	3b_49	0	0.389	0.253	74.7	0.243	0.805	-0.217	B8	3b	1403101
Exp. 3	A	CAR	7	slow_regular	9	c2	3b_50	0	0.519	0.337	66.3	0.26	0.861	-0.15	B9	3b	1403101
Exp. 3	A	CAR	7	slow_regular	9	d2	3b_51	0	-0.027	-0.018	101.8	0.087	0.288	-1.245	B10	3b	1403101
Exp. 3	A	CAR	7	slow_regular	9	e2	3b_52	0	0.262	0.17	83	0.164	0.543	-0.611	B11	3b	1403101
Exp. 3	A	CAR	7	slow_regular	10	a2	3a_54	0	1.298	0.825	17.5	0.261	0.897	-0.109	A7	3a	14031212
Exp. 3	A	CAR	7	slow_regular	10	b2	3a_55	0	0.572	0.364	63.6	0.206	0.708	-0.345	A8	3a	14031212
Exp. 3	A	CAR	7	slow_regular	10	c2	3a_56	0	0.632	0.402	59.8	0.23	0.79	-0.236	A9	3a	14031212
Exp. 3	A	CAR	7	slow_regular	10	d2	3a_57	1	-0.021	-0.013	101.3	0.081	0.278	-1.28	A10	3a	14031212
Exp. 3	A	CAR	7	slow_regular	10	e2	3a_58	0	0.52	0.331	66.9	0.171	0.588	-0.531	A11	3a	14031212
Exp. 3	A	CAR	7	slow_regular	10	f2	3a_59	0	0.729	0.463	53.7	0.176	0.605	-0.503	A12	3a	14031212
Exp. 3	A	CAR	7	slow_regular	10	a2	3b_54	0	1.064	0.691	30.9	0.261	0.864	-0.146	A7	3b	1403101
Exp. 3	A	CAR	7	slow_regular	10	b2	3b_55	0	0.527	0.342	65.8	0.203	0.672	-0.397	A8	3b	1403101
Exp. 3	A	CAR	7	slow_regular	10	c2	3b_56	0	0.444	0.288	71.2	0.203	0.672	-0.397	A9	3b	1403101
Exp. 3	A	CAR	7	slow_regular	10	d2	3b_57	1	-0.016	-0.01	101	0.083	0.275	-1.291	A10	3b	1403101
Exp. 3	A	CAR	7	random	11	a2	3a_60	0	1.178	0.749	25.1	0.226	0.777	-0.252	C7	3a	14031212
Exp. 3	A	CAR	7	random	11	b2	3a_61	1	0.006	0.004	99.6	0.086	0.296	-1.217	C8	3a	14031212
Exp. 3	A	CAR	7	random	11	c2	3a_62	1	-0.021	-0.013	101.3	0.078	0.268	-1.317	C9	3a	14031212
Exp. 3	A	CAR	7	random	11	d2	3a_63	0	1.671	1.062	-6.2	0.306	1.052	0.051	C10	3a	14031212
Exp. 3	A	CAR	7	random	11	e2	3a_64	1	0.004	0.003	99.7	0.083	0.285	-1.255	C11	3a	14031212
Exp. 3	A	CAR	7	random	11	f2	3a_65	1	-0.037	-0.024	102.4	0.08	0.275	-1.291	C12	3a	14031212
Exp. 3	A	CAR	7	random	11	a2	3b_60	0	1.119	0.727	27.3	0.223	0.738	-0.304	C7	3b	1403101
Exp. 3	A	CAR	7	random	11	b2	3b_61	1	-0.018	-0.012	101.2	0.085	0.281	-1.269	C8	3b	1403101
Exp. 3	A	CAR	7	random	11	c2	3b_62	1	-0.001	-0.001	100.1	0.084	0.278	-1.28	C9	3b	1403101
Exp. 3	A	CAR	7	random	11	d2	3b_63	0	1.536	0.998	0.2	0.289	0.957	-0.044	C10	3b	1403101
Exp. 3	A	CAR	7	random	11	e2	3b_64	0	-0.047	-0.031	103.1	0.078	0.258	-1.355	C11	3b	1403101
Exp. 3	A	CAR	7	random	11	f2	3b_65	1	0.158	0.103	89.7	0.107	0.354	-1.038	C12	3b	1403101
Exp. 3	B	DOR	7	random	12	a2	3a_66	0	0.638	0.406	59.4	0.193	0.663	-0.411	E1	3a	14031212
Exp. 3	B	DOR	7	random	12	b2	3a_67	0	0.755	0.48	52	0.201	0.691	-0.37	E2	3a	14031212
Exp. 3	B	DOR	7	random	12	c2	3a_68	0	0.528	0.336	66.4	0.245	0.842	-0.172	E3	3a	14031212
Exp. 3	B	DOR	7	random	12	d2	3a_69	1	0.055	0.035	96.5	0.094	0.323	-1.13	E4	3a	14031212
Exp. 3	B	DOR	7	random	12	e2	3a_70	0	0.982	0.624	37.6	0.22	0.756	-0.28	E5	3a	14031212
Exp. 3	B	DOR	7	random	12	f2	3a_71	1	0.031	0.02	98	0.086	0.296	-1.217	E6	3a	14031212
Exp. 3	B	DOR	7	random	12	a2	3b_66	0	0.511	0.332	66.8	0.169	0.56	-0.58	E1	3b	1403101
Exp. 3	B	DOR	7	random	12	b2	3b_67	0	0.734	0.477	52.3	0.198	0.656	-0.422	E2	3b	1403101
Exp. 3	B	DOR	7	random	12	c2	3b_68	0	-0.057	-0.037	103.7	0.079	0.262	-1.339	E3	3b	1403101
Exp. 3	B	DOR	7	random	12	d2	3b_69	1	-0.003	-0.002	100.2	0.082	0.272	-1.302	E4	3b	1403101
Exp. 3	B	DOR	7	random	12	e2	3b_70	1	-0.024	-0.016	101.6	0.077	0.255	-1.366	E5	3b	1403101
Exp. 3	B	DOR	7	random	12	f2	3b_71	1	-0.07	-0.045	104.5	0.073	0.242	-1.419	E6	3b	1403101
Exp. 3	B	DOR	7	random	13	a2	3a_72	0	0.962	0.612	38.8	0.269	0.924	-0.079	G1	3a	14031212
Exp. 3	B	DOR	7	random	13	b2	3a_73	0	0.161	0.102	89.8	0.179	0.615	-0.486	G2	3a	14031212
Exp. 3	B	DOR	7	random	13	c2	3a_74	1	-0.011	-0.007	100.7	0.08	0.275	-1.291	G3	3a	14031212
Exp. 3	B	DOR	7	random	13	d2	3a_75	0	1.487	0.945	5.5	0.282	0.969	-0.031	G4	3a	14031212
Exp. 3	B	DOR	7	random	13	e2	3a_76	0	0.167	0.106	89.4	0.182	0.625	-0.47	G5	3a	14031212
Exp. 3	B	DOR	7	random	13	f2	3a_77	1	-0.033	-0.021	102.1	0.094	0.323	-1.13	G6	3a	14031212
Exp. 3	B	DOR	7	random	13	a2	3b_72	0	1.182	0.768	23.2	0.263	0.871	-0.138	G1	3b	1403101
Exp. 3	B	DOR	7	random	13	b2	3b_73	1	-0.003	-0.002	100.2	0.08	0.265	-1.328	G2	3b	1403101
Exp. 3	B	DOR	7	random	13	c2	3b_74	0	0.658	0.428	57.2	0.22	0.728	-0.317	G3	3b	1403101
Exp. 3	B	DOR	7	random	13	d2	3b_75	0	1.481	0.962	3.8	0.275	0.911	-0.093	G4	3b	1403101
Exp. 3	B	DOR	7	random	13	e2	3b_76	0	0.868	0.564	43.6	0.253	0.838	-0.177	G5	3b	1403101
Exp. 3	B	DOR	7	random	13	f2	3b_77	1	0.04	0.026	97.4	0.086	0.285	-1.255	G6	3b	1403101
Exp. 3	B	DOR	7	random	14	a2	3a_78	0	1.519	0.966	3.4	0.309	1.062	0.06	D1	3a	14031212
Exp. 3	B	DOR	7	random	14	b2	3a_79	1	0.007	0.004	99.6	0.082	0.282	-1.266	D2	3a	14031212
Exp. 3	B	DOR	7	random	14	c2	3a_80	0	1.186	0.754	24.6	0.232	0.797	-0.227	D3	3a	14031212
Exp. 3	B	DOR	7	random	14	d2	3a_81	0	1.258	0.8	20	0.238	0.818	-0.201	D4	3a	14031212
Exp. 3	B	DOR	7	random	14	e2	3a_82	1	-0.005	-0.003	100.3	0.081	0.278	-1.28	D5	3a	14031212
Exp. 3	B	DOR	7	random	14	f2	3a_83	0	0.562	0.357	64.3	0.175	0.601	-0.509	D6	3a	14031212
Exp. 3	B	DOR	7	random	14	a2	3b_78	0	1.376	0.894	10.6	0.276	0.914	-0.09	D1	3b	1403101
Exp. 3	B	DOR	7	random	14	b2	3b_79	1	-0.007	-0.005	100.5	0.079	0.262	-1.339	D2	3b	1403101
Exp. 3	B	DOR	7	random	14	c2	3b_80	0	1.021	0.663	33.7	0.207	0.685	-0.378	D3	3b	1403101
Exp. 3	B	DOR	7	random	14	d2	3b_81	0	1.09	0.708	29.2	0.218	0.722	-0.326	D4	3b	1403101
Exp. 3	B	DOR	7	random	14	e2	3b_82	1	0.011	0.007	99.3	0.088	0.291	-1.234	D5	3b	1403101
Exp. 3	B	DOR	7	random	14	f2	3b_83	0	0.564	0.366	63.4	0.161	0.533	-0.629	D6	3b	1403101
Exp. 3	C	CEF	7	random	15	a2	3a_84	1	0.071	0.045	95.5	0.09	0.309	-1.174	H1	3a	14031212
Exp. 3	C	CEF	7	random	15	b2	3a_85	1	0.028	0.018	98.2	0.086	0.296	-1.217	H2	3a	14031212
Exp. 3	C	CEF	7	random	15	c2	3a_86	0	0.827	0.526	47.4	0.221	0.759	-0.276	H3	3a	14031212
Exp. 3	C	CEF	7	random	15	d2	3a_87	1	0.022	0.014	98.6	0.083	0.285	-1.255	H4	3a	14031212
Exp. 3	C	CEF	7	random	15	e2	3a_88	0	1.454	0.924	7.6	0.303	1.041	0.04	H5	3a	14031212
Exp. 3	C	CEF	7	random	15	f2	3a_89	0	1.217	0.774	22.6	0.302	1.038	0.037	H6	3a	14031212
Exp. 3	C	CEF	7	random	15	a2	3b_84	1	0.029	0.019	98.1	0.086	0.285	-1.255	H1	3b	1403101
Exp. 3	C	CEF	7	random	15	b2	3b_85	1	-0.003	-0.002	100.2	0.093	0.308	-1.178	H2	3b	1403101
Exp. 3	C	CEF	7	random	15	c2	3b_86	1	-0.024	-0.016	101.6	0.079	0.262	-1.339	H3	3b	1403101
Exp. 3	C	CEF	7	random	15	d2	3b_87	1	0.01	0.006	99.4	0.075	0.248	-1.394	H4	3b	1403101
Exp. 3	C	CEF	7	random	15	e2	3b_88	0	1.367	0.888	11.2	0.279	0.924	-0.079	H5	3b	1403101
Exp. 3	C	CEF	7	random	15	f2	3b_89	0	1.258	0.817	18.3	0.305	1.01	0.01	H6	3b	1403101
Exp. 3	A	CAR	7	random	16	a2	3a_90	0	1.038	0.66	34	0.293	1.007	0.007	H7	3a	14031212
Exp. 3	A	CAR	7	random	16	b2	3a_91	0	-0.003	-0.002	100.2	0.11	0.378	-0.973	H8	3a	14031212
Exp. 3	A	CAR	7	random	16	c2	3a_92	0	1.034	0.657	34.3	0.252	0.866	-0.144	H9	3a	14031212
Exp. 3	A	CAR	7	random	16	d2	3a_93	1	-0.069	-0.044	104.4	0.072	0.247	-1.398	H10	3a	14031212
Exp. 3	A	CAR	7	random	16	e2	3a_94	0	0.152	0.097	90.3	0.166	0.57	-0.562	H11	3a	14031212
Exp. 3	A	CAR	7	random	16	f2	3a_95	0	-0.05	-0.032	103.2	0.082	0.282	-1.266	H12	3a	14031212
Exp. 3	A	CAR	7	random	16	a2	3b_90	0	0.936	0.608	39.2	0.272	0.901	-0.104	H7	3b	1403101
Exp. 3	A	CAR	7	random	16	b2	3b_91	0	0.081	0.053	94.7	0.133	0.44	-0.821	H8	3b	1403101
Exp. 3	A	CAR	7	random	16	c2	3b_92	0	-0.012	-0.008	100.8	0.115	0.381	-0.965	H9	3b	1403101
Exp. 3	A	CAR	7	random	16	d2	3b_93	1	-0.065	-0.042	104.2	0.074	0.245	-1.406	H10	3b	1403101
Exp. 3	A	CAR	7	random	16	e2	3b_94	0	0.007	0.005	99.5	0.127	0.421	-0.865	H11	3b	1403101
Exp. 3	A	CAR	7	random	16	f2	3b_95	1	-0.024	-0.016	101.6	0.081	0.268	-1.317	H12	3b	1403101
Exp. 3	A	CAR	8	mono	1	a2	3a_1	0	1.138	0.796	20.4	0.22	0.772	-0.259	G7	3a	14031212
Exp. 3	A	CAR	8	mono	1	b2	3a_2	0	0.451	0.315	68.5	0.192	0.674	-0.395	G8	3a	14031212
Exp. 3	A	CAR	8	mono	1	c2	3a_3	0	1.235	0.864	13.6	0.258	0.905	-0.1	G9	3a	14031212
Exp. 3	A	CAR	8	mono	1	d2	3a_4	0	1.282	0.897	10.3	0.27	0.947	-0.054	G10	3a	14031212
Exp. 3	A	CAR	8	mono	1	e2	3a_5	1	-0.109	-0.076	107.6	0.074	0.26	-1.347	G11	3a	14031212
Exp. 3	A	CAR	8	mono	1	f2	3a_6	0	0.578	0.404	59.6	0.197	0.691	-0.37	G12	3a	14031212
Exp. 3	A	CAR	8	mono	1	a2	3b_1	0	0.914	0.616	38.4	0.216	0.761	-0.273	G7	3b	1403101
Exp. 3	A	CAR	8	mono	1	b2	3b_2	0	0.252	0.17	83	0.124	0.437	-0.828	G8	3b	1403101
Exp. 3	A	CAR	8	mono	1	c2	3b_3	0	1.308	0.881	11.9	0.261	0.919	-0.084	G9	3b	1403101
Exp. 3	A	CAR	8	mono	1	d2	3b_4	0	1.376	0.927	7.3	0.267	0.94	-0.062	G10	3b	1403101
Exp. 3	A	CAR	8	mono	1	e2	3b_5	0	0.47	0.317	68.3	0.166	0.585	-0.536	G11	3b	1403101
Exp. 3	A	CAR	8	mono	1	f2	3b_6	0	0.593	0.4	60	0.164	0.577	-0.55	G12	3b	1403101
Exp. 3	B	DOR	8	mono	2	d2	3a_10	0	0.848	0.593	40.7	0.225	0.789	-0.237	B4	3a	14031212
Exp. 3	B	DOR	8	mono	2	e2	3a_11	0	1.296	0.906	9.4	0.264	0.926	-0.077	B5	3a	14031212
Exp. 3	B	DOR	8	mono	2	f2	3a_12	0	1.273	0.89	11	0.272	0.954	-0.047	B6	3a	14031212
Exp. 3	B	DOR	8	mono	2	a2	3a_7	0	0.902	0.631	36.9	0.227	0.796	-0.228	B1	3a	14031212
Exp. 3	B	DOR	8	mono	2	b2	3a_8	0	1.376	0.962	3.8	0.277	0.972	-0.028	B2	3a	14031212
Exp. 3	B	DOR	8	mono	2	c2	3a_9	0	1.421	0.994	0.6	0.287	1.007	0.007	B3	3a	14031212
Exp. 3	B	DOR	8	mono	2	d2	3b_10	0	0.709	0.478	52.2	0.238	0.838	-0.177	B4	3b	1403101
Exp. 3	B	DOR	8	mono	2	e2	3b_11	0	1.246	0.84	16	0.274	0.965	-0.036	B5	3b	1403101
Exp. 3	B	DOR	8	mono	2	f2	3b_12	0	1.257	0.847	15.3	0.264	0.93	-0.073	B6	3b	1403101
Exp. 3	B	DOR	8	mono	2	a2	3b_7	0	0.634	0.427	57.3	0.208	0.732	-0.312	B1	3b	1403101
Exp. 3	B	DOR	8	mono	2	b2	3b_8	0	1.252	0.844	15.6	0.263	0.926	-0.077	B2	3b	1403101
Exp. 3	B	DOR	8	mono	2	c2	3b_9	0	1.373	0.925	7.5	0.276	0.972	-0.028	B3	3b	1403101
Exp. 3	C	CEF	8	mono	3	a2	3a_13	0	1.233	0.862	13.8	0.257	0.902	-0.103	E7	3a	14031212
Exp. 3	C	CEF	8	mono	3	b2	3a_14	0	1.376	0.962	3.8	0.27	0.947	-0.054	E8	3a	14031212
Exp. 3	C	CEF	8	mono	3	c2	3a_15	0	1.296	0.906	9.4	0.261	0.916	-0.088	E9	3a	14031212
Exp. 3	C	CEF	8	mono	3	d2	3a_16	0	1.182	0.827	17.3	0.249	0.874	-0.135	E10	3a	14031212
Exp. 3	C	CEF	8	mono	3	e2	3a_17	0	1.422	0.994	0.6	0.283	0.993	-0.007	E11	3a	14031212
Exp. 3	C	CEF	8	mono	3	f2	3a_18	0	0.938	0.656	34.4	0.242	0.849	-0.164	E12	3a	14031212
Exp. 3	C	CEF	8	mono	3	a2	3b_13	0	1.118	0.753	24.7	0.25	0.88	-0.128	E7	3b	1403101
Exp. 3	C	CEF	8	mono	3	b2	3b_14	0	1.423	0.959	4.1	0.271	0.954	-0.047	E8	3b	1403101
Exp. 3	C	CEF	8	mono	3	c2	3b_15	0	1.31	0.883	11.7	0.25	0.88	-0.128	E9	3b	1403101
Exp. 3	C	CEF	8	mono	3	d2	3b_16	1	-0.073	-0.049	104.9	0.073	0.257	-1.359	E10	3b	1403101
Exp. 3	C	CEF	8	mono	3	e2	3b_17	0	1.398	0.942	5.8	0.271	0.954	-0.047	E11	3b	1403101
Exp. 3	C	CEF	8	mono	3	f2	3b_18	0	0.867	0.584	41.6	0.238	0.838	-0.177	E12	3b	1403101
Exp. 3	B	DOR	8	fast_regular	5	a2	3a_24	0	1.417	0.991	0.9	0.285	1	0	D1	3a	14031212
Exp. 3	B	DOR	8	fast_regular	5	b2	3a_25	1	0.017	0.012	98.8	0.078	0.274	-1.295	D2	3a	14031212
Exp. 3	B	DOR	8	fast_regular	5	c2	3a_26	1	0.019	0.013	98.7	0.084	0.295	-1.221	D3	3a	14031212
Exp. 3	B	DOR	8	fast_regular	5	d2	3a_27	0	1.287	0.9	10	0.244	0.856	-0.155	D4	3a	14031212
Exp. 3	B	DOR	8	fast_regular	5	e2	3a_28	1	-0.075	-0.052	105.2	0.083	0.291	-1.234	D5	3a	14031212
Exp. 3	B	DOR	8	fast_regular	5	f2	3a_29	1	0.016	0.011	98.9	0.08	0.281	-1.269	D6	3a	14031212
Exp. 3	B	DOR	8	fast_regular	5	a2	3b_24	0	1.391	0.937	6.3	0.288	1.014	0.014	D1	3b	1403101
Exp. 3	B	DOR	8	fast_regular	5	b2	3b_25	1	-0.013	-0.009	100.9	0.086	0.303	-1.194	D2	3b	1403101
Exp. 3	B	DOR	8	fast_regular	5	c2	3b_26	0	0.752	0.507	49.3	0.203	0.715	-0.335	D3	3b	1403101
Exp. 3	B	DOR	8	fast_regular	5	d2	3b_27	0	1.079	0.727	27.3	0.218	0.768	-0.264	D4	3b	1403101
Exp. 3	B	DOR	8	fast_regular	5	e2	3b_28	0	0.923	0.622	37.8	0.21	0.739	-0.302	D5	3b	1403101
Exp. 3	B	DOR	8	fast_regular	5	f2	3b_29	1	-0.015	-0.01	101	0.08	0.282	-1.266	D6	3b	1403101
Exp. 3	A	CAR	8	fast_regular	6	a2	3a_30	0	1.143	0.799	20.1	0.266	0.933	-0.069	C7	3a	14031212
Exp. 3	A	CAR	8	fast_regular	6	b2	3a_31	0	0.492	0.344	65.6	0.129	0.453	-0.792	C8	3a	14031212
Exp. 3	A	CAR	8	fast_regular	6	c2	3a_32	1	-0.05	-0.035	103.5	0.082	0.288	-1.245	C9	3a	14031212
Exp. 3	A	CAR	8	fast_regular	6	d2	3a_33	0	-0.017	-0.012	101.2	0.083	0.291	-1.234	C10	3a	14031212
Exp. 3	A	CAR	8	fast_regular	6	e2	3a_34	1	-0.014	-0.01	101	0.077	0.27	-1.309	C11	3a	14031212
Exp. 3	A	CAR	8	fast_regular	6	f2	3a_35	1	-0.037	-0.026	102.6	0.084	0.295	-1.221	C12	3a	14031212
Exp. 3	A	CAR	8	fast_regular	6	a2	3b_30	0	1.086	0.732	26.8	0.257	0.905	-0.1	C7	3b	1403101
Exp. 3	A	CAR	8	fast_regular	6	b2	3b_31	0	-0.029	-0.02	102	0.087	0.306	-1.184	C8	3b	1403101
Exp. 3	A	CAR	8	fast_regular	6	c2	3b_32	1	-0.033	-0.022	102.2	0.079	0.278	-1.28	C9	3b	1403101
Exp. 3	A	CAR	8	fast_regular	6	d2	3b_33	1	-0.001	-0.001	100.1	0.085	0.299	-1.207	C10	3b	1403101
Exp. 3	A	CAR	8	fast_regular	6	e2	3b_34	0	1.273	0.858	14.2	0.286	1.007	0.007	C11	3b	1403101
Exp. 3	A	CAR	8	fast_regular	6	f2	3b_35	0	0.185	0.125	87.5	0.11	0.387	-0.949	C12	3b	1403101
Exp. 3	A	CAR	8	fast_regular	7	a2	3a_36	0	1.074	0.751	24.9	0.252	0.884	-0.123	F1	3a	14031212
Exp. 3	A	CAR	8	fast_regular	7	b2	3a_37	0	1.004	0.702	29.8	0.209	0.733	-0.311	F2	3a	14031212
Exp. 3	A	CAR	8	fast_regular	7	c2	3a_38	0	-0.009	-0.006	100.6	0.09	0.316	-1.152	F3	3a	14031212
Exp. 3	A	CAR	8	fast_regular	7	d2	3a_39	0	1.255	0.878	12.2	0.236	0.828	-0.189	F4	3a	14031212
Exp. 3	A	CAR	8	fast_regular	7	e2	3a_40	0	0.802	0.561	43.9	0.173	0.607	-0.499	F5	3a	14031212
Exp. 3	A	CAR	8	fast_regular	7	f2	3a_41	0	-0.076	-0.053	105.3	0.087	0.305	-1.187	F6	3a	14031212
Exp. 3	A	CAR	8	fast_regular	7	a2	3b_36	0	0.953	0.642	35.8	0.259	0.912	-0.092	F1	3b	1403101
Exp. 3	A	CAR	8	fast_regular	7	b2	3b_37	1	-0.023	-0.015	101.5	0.077	0.271	-1.306	F2	3b	1403101
Exp. 3	A	CAR	8	fast_regular	7	c2	3b_38	1	0.01	0.007	99.3	0.085	0.299	-1.207	F3	3b	1403101
Exp. 3	A	CAR	8	fast_regular	7	d2	3b_39	1	-0.001	-0.001	100.1	0.077	0.271	-1.306	F4	3b	1403101
Exp. 3	A	CAR	8	fast_regular	7	e2	3b_40	0	1.166	0.786	21.4	0.237	0.835	-0.18	F5	3b	1403101
Exp. 3	A	CAR	8	fast_regular	7	f2	3b_41	1	-0.041	-0.028	102.8	0.075	0.264	-1.332	F6	3b	1403101
Exp. 3	B	DOR	8	slow_regular	8	a2	3a_42	0	1.51	1.056	-5.6	0.284	0.996	-0.004	A1	3a	14031212
Exp. 3	B	DOR	8	slow_regular	8	b2	3a_43	0	1.645	1.15	-15	0.351	1.232	0.209	A2	3a	14031212
Exp. 3	B	DOR	8	slow_regular	8	c2	3a_44	0	0.926	0.648	35.2	0.217	0.761	-0.273	A3	3a	14031212
Exp. 3	B	DOR	8	slow_regular	8	d2	3a_45	0	0.886	0.62	38	0.221	0.775	-0.255	A4	3a	14031212
Exp. 3	B	DOR	8	slow_regular	8	e2	3a_46	0	1.605	1.122	-12.2	0.349	1.225	0.203	A5	3a	14031212
Exp. 3	B	DOR	8	slow_regular	8	f2	3a_47	0	0.657	0.459	54.1	0.202	0.709	-0.344	A6	3a	14031212
Exp. 3	B	DOR	8	slow_regular	8	a2	3b_42	0	1.367	0.921	7.9	0.289	1.018	0.018	A1	3b	1403101
Exp. 3	B	DOR	8	slow_regular	8	b2	3b_43	0	1.487	1.002	-0.2	0.354	1.246	0.22	A2	3b	1403101
Exp. 3	B	DOR	8	slow_regular	8	c2	3b_44	0	0.898	0.605	39.5	0.213	0.75	-0.288	A3	3b	1403101
Exp. 3	B	DOR	8	slow_regular	8	d2	3b_45	0	0.673	0.454	54.6	0.194	0.683	-0.381	A4	3b	1403101
Exp. 3	B	DOR	8	slow_regular	8	e2	3b_46	0	1.056	0.712	28.8	0.234	0.824	-0.194	A5	3b	1403101
Exp. 3	B	DOR	8	slow_regular	8	f2	3b_47	0	0.996	0.671	32.9	0.235	0.827	-0.19	A6	3b	1403101
Exp. 3	A	CAR	8	slow_regular	9	a2	3a_48	0	1.25	0.874	12.6	0.279	0.979	-0.021	B7	3a	14031212
Exp. 3	A	CAR	8	slow_regular	9	b2	3a_49	0	1.159	0.81	19	0.259	0.909	-0.095	B8	3a	14031212
Exp. 3	A	CAR	8	slow_regular	9	c2	3a_50	0	1.383	0.967	3.3	0.262	0.919	-0.084	B9	3a	14031212
Exp. 3	A	CAR	8	slow_regular	9	d2	3a_51	0	0.907	0.634	36.6	0.228	0.8	-0.223	B10	3a	14031212
Exp. 3	A	CAR	8	slow_regular	9	e2	3a_52	0	1.439	1.006	-0.6	0.27	0.947	-0.054	B11	3a	14031212
Exp. 3	A	CAR	8	slow_regular	9	f2	3a_53	0	0.991	0.693	30.7	0.219	0.768	-0.264	B12	3a	14031212
Exp. 3	A	CAR	8	slow_regular	9	a2	3b_48	0	1.132	0.763	23.7	0.278	0.979	-0.021	B7	3b	1403101
Exp. 3	A	CAR	8	slow_regular	9	b2	3b_49	0	1.214	0.818	18.2	0.251	0.884	-0.123	B8	3b	1403101
Exp. 3	A	CAR	8	slow_regular	9	c2	3b_50	0	1.211	0.816	18.4	0.264	0.93	-0.073	B9	3b	1403101
Exp. 3	A	CAR	8	slow_regular	9	d2	3b_51	0	-0.001	-0.001	100.1	0.083	0.292	-1.231	B10	3b	1403101
Exp. 3	A	CAR	8	slow_regular	9	e2	3b_52	0	0.915	0.617	38.3	0.258	0.908	-0.097	B11	3b	1403101
Exp. 3	A	CAR	8	slow_regular	10	a2	3a_54	0	1.309	0.915	8.5	0.262	0.919	-0.084	A7	3a	14031212
Exp. 3	A	CAR	8	slow_regular	10	b2	3a_55	0	0.635	0.444	55.6	0.25	0.877	-0.131	A8	3a	14031212
Exp. 3	A	CAR	8	slow_regular	10	c2	3a_56	0	0.599	0.419	58.1	0.169	0.593	-0.523	A9	3a	14031212
Exp. 3	A	CAR	8	slow_regular	10	d2	3a_57	1	-0.017	-0.012	101.2	0.075	0.263	-1.336	A10	3a	14031212
Exp. 3	A	CAR	8	slow_regular	10	e2	3a_58	0	0.471	0.329	67.1	0.175	0.614	-0.488	A11	3a	14031212
Exp. 3	A	CAR	8	slow_regular	10	f2	3a_59	0	0.716	0.501	49.9	0.183	0.642	-0.443	A12	3a	14031212
Exp. 3	A	CAR	8	slow_regular	10	a2	3b_54	0	1.23	0.829	17.1	0.283	0.996	-0.004	A7	3b	1403101
Exp. 3	A	CAR	8	slow_regular	10	b2	3b_55	0	0.83	0.559	44.1	0.209	0.736	-0.307	A8	3b	1403101
Exp. 3	A	CAR	8	slow_regular	10	c2	3b_56	0	0.793	0.534	46.6	0.201	0.708	-0.345	A9	3b	1403101
Exp. 3	A	CAR	8	slow_regular	10	d2	3b_57	1	-0.009	-0.006	100.6	0.086	0.303	-1.194	A10	3b	1403101
Exp. 3	B	DOR	8	random	11	a2	3a_60	0	1.422	0.994	0.6	0.284	0.996	-0.004	C1	3a	14031212
Exp. 3	B	DOR	8	random	11	b2	3a_61	1	0.004	0.003	99.7	0.078	0.274	-1.295	C2	3a	14031212
Exp. 3	B	DOR	8	random	11	c2	3a_62	1	-0.004	-0.003	100.3	0.085	0.298	-1.211	C3	3a	14031212
Exp. 3	B	DOR	8	random	11	d2	3a_63	0	1.335	0.934	6.6	0.252	0.884	-0.123	C4	3a	14031212
Exp. 3	B	DOR	8	random	11	e2	3a_64	1	0	0	100	0.081	0.284	-1.259	C5	3a	14031212
Exp. 3	B	DOR	8	random	11	f2	3a_65	1	-0.011	-0.008	100.8	0.084	0.295	-1.221	C6	3a	14031212
Exp. 3	B	DOR	8	random	11	a2	3b_60	0	1.367	0.921	7.9	0.275	0.968	-0.033	C1	3b	1403101
Exp. 3	B	DOR	8	random	11	b2	3b_61	1	-0.029	-0.02	102	0.076	0.268	-1.317	C2	3b	1403101
Exp. 3	B	DOR	8	random	11	c2	3b_62	1	-0.018	-0.012	101.2	0.093	0.327	-1.118	C3	3b	1403101
Exp. 3	B	DOR	8	random	11	d2	3b_63	0	1.01	0.681	31.9	0.207	0.729	-0.316	C4	3b	1403101
Exp. 3	B	DOR	8	random	11	e2	3b_64	0	0.007	0.005	99.5	0.079	0.278	-1.28	C5	3b	1403101
Exp. 3	B	DOR	8	random	11	f2	3b_65	1	0.001	0.001	99.9	0.085	0.299	-1.207	C6	3b	1403101
Exp. 3	A	CAR	8	random	12	a2	3a_66	0	1.179	0.824	17.6	0.29	1.018	0.018	H7	3a	14031212
Exp. 3	A	CAR	8	random	12	b2	3a_67	0	0.403	0.282	71.8	0.157	0.551	-0.596	H8	3a	14031212
Exp. 3	A	CAR	8	random	12	c2	3a_68	0	0.741	0.518	48.2	0.249	0.874	-0.135	H9	3a	14031212
Exp. 3	A	CAR	8	random	12	d2	3a_69	1	0.087	0.061	93.9	0.124	0.435	-0.832	H10	3a	14031212
Exp. 3	A	CAR	8	random	12	e2	3a_70	0	1.383	0.967	3.3	0.297	1.042	0.041	H11	3a	14031212
Exp. 3	A	CAR	8	random	12	f2	3a_71	1	-0.057	-0.04	104	0.073	0.256	-1.363	H12	3a	14031212
Exp. 3	A	CAR	8	random	12	a2	3b_66	0	1.248	0.841	15.9	0.29	1.021	0.021	H7	3b	1403101
Exp. 3	A	CAR	8	random	12	b2	3b_67	0	0.658	0.443	55.7	0.123	0.433	-0.837	H8	3b	1403101
Exp. 3	A	CAR	8	random	12	c2	3b_68	0	0.009	0.006	99.4	0.089	0.313	-1.162	H9	3b	1403101
Exp. 3	A	CAR	8	random	12	d2	3b_69	1	-0.058	-0.039	103.9	0.08	0.282	-1.266	H10	3b	1403101
Exp. 3	A	CAR	8	random	12	e2	3b_70	1	-0.035	-0.024	102.4	0.08	0.282	-1.266	H11	3b	1403101
Exp. 3	A	CAR	8	random	12	f2	3b_71	1	-0.003	-0.002	100.2	0.078	0.275	-1.291	H12	3b	1403101
Exp. 3	B	DOR	8	random	13	a2	3a_72	0	1.077	0.753	24.7	0.268	0.94	-0.062	G1	3a	14031212
Exp. 3	B	DOR	8	random	13	b2	3a_73	0	1.366	0.955	4.5	0.299	1.049	0.048	G2	3a	14031212
Exp. 3	B	DOR	8	random	13	c2	3a_74	1	-0.008	-0.006	100.6	0.075	0.263	-1.336	G3	3a	14031212
Exp. 3	B	DOR	8	random	13	d2	3a_75	0	1.46	1.021	-2.1	0.286	1.004	0.004	G4	3a	14031212
Exp. 3	B	DOR	8	random	13	e2	3a_76	0	1.282	0.897	10.3	0.265	0.93	-0.073	G5	3a	14031212
Exp. 3	B	DOR	8	random	13	f2	3a_77	1	0.004	0.003	99.7	0.088	0.309	-1.174	G6	3a	14031212
Exp. 3	B	DOR	8	random	13	a2	3b_72	0	1.094	0.737	26.3	0.267	0.94	-0.062	G1	3b	1403101
Exp. 3	B	DOR	8	random	13	b2	3b_73	1	0.016	0.011	98.9	0.079	0.278	-1.28	G2	3b	1403101
Exp. 3	B	DOR	8	random	13	c2	3b_74	0	1.292	0.871	12.9	0.281	0.989	-0.011	G3	3b	1403101
Exp. 3	B	DOR	8	random	13	d2	3b_75	0	1.55	1.044	-4.4	0.29	1.021	0.021	G4	3b	1403101
Exp. 3	B	DOR	8	random	13	e2	3b_76	0	1.274	0.858	14.2	0.273	0.961	-0.04	G5	3b	1403101
Exp. 3	B	DOR	8	random	13	f2	3b_77	1	0.045	0.03	97	0.086	0.303	-1.194	G6	3b	1403101
Exp. 3	A	CAR	8	random	14	a2	3a_78	0	1.178	0.824	17.6	0.223	0.782	-0.246	D7	3a	14031212
Exp. 3	A	CAR	8	random	14	b2	3a_79	1	-0.065	-0.045	104.5	0.077	0.27	-1.309	D8	3a	14031212
Exp. 3	A	CAR	8	random	14	c2	3a_80	0	1.33	0.93	7	0.283	0.993	-0.007	D9	3a	14031212
Exp. 3	A	CAR	8	random	14	d2	3a_81	0	1.313	0.918	8.2	0.278	0.975	-0.025	D10	3a	14031212
Exp. 3	A	CAR	8	random	14	e2	3a_82	1	-0.042	-0.029	102.9	0.072	0.253	-1.374	D11	3a	14031212
Exp. 3	A	CAR	8	random	14	f2	3a_83	0	0.756	0.529	47.1	0.213	0.747	-0.292	D12	3a	14031212
Exp. 3	A	CAR	8	random	14	a2	3b_78	0	1.128	0.76	24	0.231	0.813	-0.207	D7	3b	1403101
Exp. 3	A	CAR	8	random	14	b2	3b_79	1	-0.066	-0.044	104.4	0.077	0.271	-1.306	D8	3b	1403101
Exp. 3	A	CAR	8	random	14	c2	3b_80	0	1.284	0.865	13.5	0.276	0.972	-0.028	D9	3b	1403101
Exp. 3	A	CAR	8	random	14	d2	3b_81	0	1.219	0.821	17.9	0.27	0.951	-0.05	D10	3b	1403101
Exp. 3	A	CAR	8	random	14	e2	3b_82	1	-0.052	-0.035	103.5	0.075	0.264	-1.332	D11	3b	1403101
Exp. 3	A	CAR	8	random	14	f2	3b_83	0	0.708	0.477	52.3	0.217	0.764	-0.269	D12	3b	1403101
Exp. 3	B	DOR	8	random	15	a2	3a_84	1	0.022	0.015	98.5	0.085	0.298	-1.211	H1	3a	14031212
Exp. 3	B	DOR	8	random	15	b2	3a_85	1	0.013	0.009	99.1	0.08	0.281	-1.269	H2	3a	14031212
Exp. 3	B	DOR	8	random	15	c2	3a_86	0	0.867	0.606	39.4	0.248	0.87	-0.139	H3	3a	14031212
Exp. 3	B	DOR	8	random	15	d2	3a_87	1	0.007	0.005	99.5	0.073	0.256	-1.363	H4	3a	14031212
Exp. 3	B	DOR	8	random	15	e2	3a_88	0	1.23	0.86	14	0.305	1.07	0.068	H5	3a	14031212
Exp. 3	B	DOR	8	random	15	f2	3a_89	0	1.206	0.843	15.7	0.304	1.067	0.065	H6	3a	14031212
Exp. 3	B	DOR	8	random	15	a2	3b_84	1	0.026	0.018	98.2	0.082	0.289	-1.241	H1	3b	1403101
Exp. 3	B	DOR	8	random	15	b2	3b_85	1	0.032	0.022	97.8	0.083	0.292	-1.231	H2	3b	1403101
Exp. 3	B	DOR	8	random	15	c2	3b_86	1	-0.011	-0.007	100.7	0.077	0.271	-1.306	H3	3b	1403101
Exp. 3	B	DOR	8	random	15	d2	3b_87	1	-0.003	-0.002	100.2	0.075	0.264	-1.332	H4	3b	1403101
Exp. 3	B	DOR	8	random	15	e2	3b_88	0	1.296	0.873	12.7	0.293	1.032	0.031	H5	3b	1403101
Exp. 3	B	DOR	8	random	15	f2	3b_89	0	1.261	0.85	15	0.322	1.134	0.126	H6	3b	1403101
Exp. 3	B	DOR	8	random	16	a2	3a_90	0	0.967	0.676	32.4	0.265	0.93	-0.073	E1	3a	14031212
Exp. 3	B	DOR	8	random	16	b2	3a_91	0	1.211	0.847	15.3	0.279	0.979	-0.021	E2	3a	14031212
Exp. 3	B	DOR	8	random	16	c2	3a_92	0	0.683	0.478	52.2	0.202	0.709	-0.344	E3	3a	14031212
Exp. 3	B	DOR	8	random	16	d2	3a_93	1	0.005	0.003	99.7	0.076	0.267	-1.321	E4	3a	14031212
Exp. 3	B	DOR	8	random	16	e2	3a_94	0	0.637	0.445	55.5	0.259	0.909	-0.095	E5	3a	14031212
Exp. 3	B	DOR	8	random	16	f2	3a_95	0	0.024	0.017	98.3	0.1	0.351	-1.047	E6	3a	14031212
Exp. 3	B	DOR	8	random	16	a2	3b_90	0	0.993	0.669	33.1	0.266	0.937	-0.065	E1	3b	1403101
Exp. 3	B	DOR	8	random	16	b2	3b_91	0	1.263	0.851	14.9	0.283	0.996	-0.004	E2	3b	1403101
Exp. 3	B	DOR	8	random	16	c2	3b_92	0	1.237	0.834	16.6	0.287	1.011	0.011	E3	3b	1403101
Exp. 3	B	DOR	8	random	16	d2	3b_93	1	0	0	100	0.078	0.275	-1.291	E4	3b	1403101
Exp. 3	B	DOR	8	random	16	e2	3b_94	0	0.848	0.571	42.9	0.27	0.951	-0.05	E5	3b	1403101
Exp. 3	B	DOR	8	random	16	f2	3b_95	1	-0.046	-0.031	103.1	0.079	0.278	-1.28	E6	3b	1403101
Exp. 3	A	CAR	9	mono	1	a2	3a_1	0	1.066	0.721	27.9	0.221	0.773	-0.257	G7	3a	14031212
Exp. 3	A	CAR	9	mono	1	b2	3a_2	0	0.446	0.302	69.8	0.186	0.65	-0.431	G8	3a	14031212
Exp. 3	A	CAR	9	mono	1	c2	3a_3	0	1.312	0.888	11.2	0.264	0.923	-0.08	G9	3a	14031212
Exp. 3	A	CAR	9	mono	1	d2	3a_4	0	1.247	0.844	15.6	0.256	0.895	-0.111	G10	3a	14031212
Exp. 3	A	CAR	9	mono	1	e2	3a_5	1	-0.058	-0.039	103.9	0.072	0.252	-1.378	G11	3a	14031212
Exp. 3	A	CAR	9	mono	1	f2	3a_6	0	0.688	0.465	53.5	0.192	0.671	-0.399	G12	3a	14031212
Exp. 3	A	CAR	9	mono	1	a2	3b_1	0	1.094	0.755	24.5	0.235	0.813	-0.207	G7	3b	1403101
Exp. 3	A	CAR	9	mono	1	b2	3b_2	0	0.395	0.273	72.7	0.149	0.516	-0.662	G8	3b	1403101
Exp. 3	A	CAR	9	mono	1	c2	3b_3	0	1.415	0.977	2.3	0.277	0.958	-0.043	G9	3b	1403101
Exp. 3	A	CAR	9	mono	1	d2	3b_4	0	1.458	1.006	-0.6	0.299	1.035	0.034	G10	3b	1403101
Exp. 3	A	CAR	9	mono	1	e2	3b_5	0	0.572	0.395	60.5	0.165	0.571	-0.56	G11	3b	1403101
Exp. 3	A	CAR	9	mono	1	f2	3b_6	0	0.693	0.478	52.2	0.169	0.585	-0.536	G12	3b	1403101
Exp. 3	B	DOR	9	mono	2	d2	3a_10	0	0.634	0.429	57.1	0.201	0.703	-0.352	B4	3a	14031212
Exp. 3	B	DOR	9	mono	2	e2	3a_11	0	1.286	0.87	13	0.252	0.881	-0.127	B5	3a	14031212
Exp. 3	B	DOR	9	mono	2	f2	3a_12	0	1.414	0.957	4.3	0.315	1.101	0.096	B6	3a	14031212
Exp. 3	B	DOR	9	mono	2	a2	3a_7	0	0.608	0.411	58.9	0.201	0.703	-0.352	B1	3a	14031212
Exp. 3	B	DOR	9	mono	2	b2	3a_8	0	1.344	0.909	9.1	0.277	0.969	-0.031	B2	3a	14031212
Exp. 3	B	DOR	9	mono	2	c2	3a_9	0	1.376	0.931	6.9	0.281	0.983	-0.017	B3	3a	14031212
Exp. 3	B	DOR	9	mono	2	d2	3b_10	0	0.68	0.469	53.1	0.194	0.671	-0.399	B4	3b	1403101
Exp. 3	B	DOR	9	mono	2	e2	3b_11	0	1.255	0.866	13.4	0.268	0.927	-0.076	B5	3b	1403101
Exp. 3	B	DOR	9	mono	2	f2	3b_12	0	1.42	0.98	2	0.305	1.055	0.054	B6	3b	1403101
Exp. 3	B	DOR	9	mono	2	a2	3b_7	0	0.515	0.355	64.5	0.174	0.602	-0.507	B1	3b	1403101
Exp. 3	B	DOR	9	mono	2	b2	3b_8	0	1.352	0.933	6.7	0.273	0.945	-0.057	B2	3b	1403101
Exp. 3	B	DOR	9	mono	2	c2	3b_9	0	1.347	0.93	7	0.276	0.955	-0.046	B3	3b	1403101
Exp. 3	C	CEF	9	mono	3	a2	3a_13	0	1.16	0.785	21.5	0.251	0.878	-0.13	E7	3a	14031212
Exp. 3	C	CEF	9	mono	3	b2	3a_14	0	1.361	0.921	7.9	0.266	0.93	-0.073	E8	3a	14031212
Exp. 3	C	CEF	9	mono	3	c2	3a_15	0	1.292	0.874	12.6	0.258	0.902	-0.103	E9	3a	14031212
Exp. 3	C	CEF	9	mono	3	d2	3a_16	0	1.3	0.88	12	0.254	0.888	-0.119	E10	3a	14031212
Exp. 3	C	CEF	9	mono	3	e2	3a_17	0	1.403	0.949	5.1	0.271	0.948	-0.053	E11	3a	14031212
Exp. 3	C	CEF	9	mono	3	f2	3a_18	0	1.023	0.692	30.8	0.242	0.846	-0.167	E12	3a	14031212
Exp. 3	C	CEF	9	mono	3	a2	3b_13	0	1.16	0.801	19.9	0.247	0.855	-0.157	E7	3b	1403101
Exp. 3	C	CEF	9	mono	3	b2	3b_14	0	1.427	0.985	1.5	0.273	0.945	-0.057	E8	3b	1403101
Exp. 3	C	CEF	9	mono	3	c2	3b_15	0	1.252	0.864	13.6	0.249	0.862	-0.149	E9	3b	1403101
Exp. 3	C	CEF	9	mono	3	d2	3b_16	1	0	0	100	0.075	0.26	-1.347	E10	3b	1403101
Exp. 3	C	CEF	9	mono	3	e2	3b_17	0	1.408	0.972	2.8	0.274	0.948	-0.053	E11	3b	1403101
Exp. 3	C	CEF	9	mono	3	f2	3b_18	0	0.987	0.681	31.9	0.243	0.841	-0.173	E12	3b	1403101
Exp. 3	C	CEF	9	fast_regular	5	a2	3a_24	0	1.227	0.83	17	0.256	0.895	-0.111	D7	3a	14031212
Exp. 3	C	CEF	9	fast_regular	5	b2	3a_25	1	-0.057	-0.039	103.9	0.078	0.273	-1.298	D8	3a	14031212
Exp. 3	C	CEF	9	fast_regular	5	c2	3a_26	1	0.005	0.003	99.7	0.087	0.304	-1.191	D9	3a	14031212
Exp. 3	C	CEF	9	fast_regular	5	d2	3a_27	0	1.395	0.944	5.6	0.274	0.958	-0.043	D10	3a	14031212
Exp. 3	C	CEF	9	fast_regular	5	e2	3a_28	1	-0.008	-0.005	100.5	0.08	0.28	-1.273	D11	3a	14031212
Exp. 3	C	CEF	9	fast_regular	5	f2	3a_29	1	0.009	0.006	99.4	0.075	0.262	-1.339	D12	3a	14031212
Exp. 3	C	CEF	9	fast_regular	5	a2	3b_24	0	1.333	0.92	8	0.266	0.92	-0.083	D7	3b	1403101
Exp. 3	C	CEF	9	fast_regular	5	b2	3b_25	1	-0.064	-0.044	104.4	0.08	0.277	-1.284	D8	3b	1403101
Exp. 3	C	CEF	9	fast_regular	5	c2	3b_26	0	1.337	0.923	7.7	0.29	1.003	0.003	D9	3b	1403101
Exp. 3	C	CEF	9	fast_regular	5	d2	3b_27	0	1.318	0.91	9	0.274	0.948	-0.053	D10	3b	1403101
Exp. 3	C	CEF	9	fast_regular	5	e2	3b_28	0	1.446	0.998	0.2	0.317	1.097	0.093	D11	3b	1403101
Exp. 3	C	CEF	9	fast_regular	5	f2	3b_29	1	0.027	0.019	98.1	0.086	0.298	-1.211	D12	3b	1403101
Exp. 3	C	CEF	9	fast_regular	6	a2	3a_30	0	1.399	0.947	5.3	0.284	0.993	-0.007	C7	3a	14031212
Exp. 3	C	CEF	9	fast_regular	6	b2	3a_31	0	0.22	0.149	85.1	0.169	0.591	-0.526	C8	3a	14031212
Exp. 3	C	CEF	9	fast_regular	6	c2	3a_32	1	-0.019	-0.013	101.3	0.083	0.29	-1.238	C9	3a	14031212
Exp. 3	C	CEF	9	fast_regular	6	d2	3a_33	0	-0.013	-0.009	100.9	0.088	0.308	-1.178	C10	3a	14031212
Exp. 3	C	CEF	9	fast_regular	6	e2	3a_34	1	0.014	0.009	99.1	0.074	0.259	-1.351	C11	3a	14031212
Exp. 3	C	CEF	9	fast_regular	6	f2	3a_35	1	0.005	0.003	99.7	0.084	0.294	-1.224	C12	3a	14031212
Exp. 3	C	CEF	9	fast_regular	6	a2	3b_30	0	1.187	0.819	18.1	0.261	0.903	-0.102	C7	3b	1403101
Exp. 3	C	CEF	9	fast_regular	6	b2	3b_31	0	0.025	0.017	98.3	0.1	0.346	-1.061	C8	3b	1403101
Exp. 3	C	CEF	9	fast_regular	6	c2	3b_32	1	-0.041	-0.028	102.8	0.073	0.253	-1.374	C9	3b	1403101
Exp. 3	C	CEF	9	fast_regular	6	d2	3b_33	1	-0.001	-0.001	100.1	0.089	0.308	-1.178	C10	3b	1403101
Exp. 3	C	CEF	9	fast_regular	6	e2	3b_34	0	1.545	1.066	-6.6	0.291	1.007	0.007	C11	3b	1403101
Exp. 3	C	CEF	9	fast_regular	6	f2	3b_35	0	0.037	0.026	97.4	0.078	0.27	-1.309	C12	3b	1403101
Exp. 3	B	DOR	9	fast_regular	7	a2	3a_36	0	1.137	0.769	23.1	0.266	0.93	-0.073	F1	3a	14031212
Exp. 3	B	DOR	9	fast_regular	7	b2	3a_37	0	0.107	0.072	92.8	0.154	0.538	-0.62	F2	3a	14031212
Exp. 3	B	DOR	9	fast_regular	7	c2	3a_38	0	0.04	0.027	97.3	0.092	0.322	-1.133	F3	3a	14031212
Exp. 3	B	DOR	9	fast_regular	7	d2	3a_39	0	1.474	0.997	0.3	0.282	0.986	-0.014	F4	3a	14031212
Exp. 3	B	DOR	9	fast_regular	7	e2	3a_40	0	0.209	0.141	85.9	0.219	0.766	-0.267	F5	3a	14031212
Exp. 3	B	DOR	9	fast_regular	7	f2	3a_41	0	-0.047	-0.032	103.2	0.079	0.276	-1.287	F6	3a	14031212
Exp. 3	B	DOR	9	fast_regular	7	a2	3b_36	0	1.086	0.749	25.1	0.265	0.917	-0.087	F1	3b	1403101
Exp. 3	B	DOR	9	fast_regular	7	b2	3b_37	1	-0.048	-0.033	103.3	0.074	0.256	-1.363	F2	3b	1403101
Exp. 3	B	DOR	9	fast_regular	7	c2	3b_38	1	-0.02	-0.014	101.4	0.085	0.294	-1.224	F3	3b	1403101
Exp. 3	B	DOR	9	fast_regular	7	d2	3b_39	1	-0.028	-0.019	101.9	0.079	0.273	-1.298	F4	3b	1403101
Exp. 3	B	DOR	9	fast_regular	7	e2	3b_40	0	0.441	0.304	69.6	0.228	0.789	-0.237	F5	3b	1403101
Exp. 3	B	DOR	9	fast_regular	7	f2	3b_41	1	-0.021	-0.014	101.4	0.08	0.277	-1.284	F6	3b	1403101
Exp. 3	C	CEF	9	slow_regular	8	a2	3a_42	0	1.445	0.978	2.2	0.276	0.965	-0.036	B7	3a	14031212
Exp. 3	C	CEF	9	slow_regular	8	b2	3a_43	0	1.426	0.965	3.5	0.277	0.969	-0.031	B8	3a	14031212
Exp. 3	C	CEF	9	slow_regular	8	c2	3a_44	0	1.319	0.892	10.8	0.274	0.958	-0.043	B9	3a	14031212
Exp. 3	C	CEF	9	slow_regular	8	d2	3a_45	0	1.305	0.883	11.7	0.273	0.955	-0.046	B10	3a	14031212
Exp. 3	C	CEF	9	slow_regular	8	e2	3a_46	0	1.478	1	0	0.284	0.993	-0.007	B11	3a	14031212
Exp. 3	C	CEF	9	slow_regular	8	f2	3a_47	0	1.049	0.71	29	0.26	0.909	-0.095	B12	3a	14031212
Exp. 3	C	CEF	9	slow_regular	8	a2	3b_42	0	1.343	0.927	7.3	0.264	0.913	-0.091	B7	3b	1403101
Exp. 3	C	CEF	9	slow_regular	8	b2	3b_43	0	1.398	0.965	3.5	0.281	0.972	-0.028	B8	3b	1403101
Exp. 3	C	CEF	9	slow_regular	8	c2	3b_44	0	1.288	0.889	11.1	0.277	0.958	-0.043	B9	3b	1403101
Exp. 3	C	CEF	9	slow_regular	8	d2	3b_45	0	1.289	0.89	11	0.279	0.965	-0.036	B10	3b	1403101
Exp. 3	C	CEF	9	slow_regular	8	e2	3b_46	0	1.71	1.18	-18	0.342	1.183	0.168	B11	3b	1403101
Exp. 3	C	CEF	9	slow_regular	9	a2	3a_48	0	1.235	0.836	16.4	0.255	0.892	-0.114	A7	3a	14031212
Exp. 3	C	CEF	9	slow_regular	9	b2	3a_49	0	1.294	0.876	12.4	0.289	1.01	0.01	A8	3a	14031212
Exp. 3	C	CEF	9	slow_regular	9	c2	3a_50	0	1.134	0.767	23.3	0.269	0.941	-0.061	A9	3a	14031212
Exp. 3	C	CEF	9	slow_regular	9	d2	3a_51	0	1.095	0.741	25.9	0.248	0.867	-0.143	A10	3a	14031212
Exp. 3	C	CEF	9	slow_regular	9	e2	3a_52	0	1.315	0.89	11	0.27	0.944	-0.058	A11	3a	14031212
Exp. 3	C	CEF	9	slow_regular	9	f2	3a_53	0	1.184	0.801	19.9	0.264	0.923	-0.08	A12	3a	14031212
Exp. 3	C	CEF	9	slow_regular	9	a2	3b_48	0	1.351	0.932	6.8	0.296	1.024	0.024	A7	3b	1403101
Exp. 3	C	CEF	9	slow_regular	9	b2	3b_49	0	1.242	0.857	14.3	0.267	0.924	-0.079	A8	3b	1403101
Exp. 3	C	CEF	9	slow_regular	9	c2	3b_50	0	1.216	0.839	16.1	0.259	0.896	-0.11	A9	3b	1403101
Exp. 3	C	CEF	9	slow_regular	9	d2	3b_51	0	0.052	0.036	96.4	0.12	0.415	-0.879	A10	3b	1403101
Exp. 3	B	DOR	9	slow_regular	10	a2	3a_54	0	1.088	0.736	26.4	0.232	0.811	-0.209	A1	3a	14031212
Exp. 3	B	DOR	9	slow_regular	10	b2	3a_55	0	0.923	0.624	37.6	0.24	0.839	-0.176	A2	3a	14031212
Exp. 3	B	DOR	9	slow_regular	10	c2	3a_56	0	0.761	0.515	48.5	0.208	0.727	-0.319	A3	3a	14031212
Exp. 3	B	DOR	9	slow_regular	10	d2	3a_57	1	-0.015	-0.01	101	0.072	0.252	-1.378	A4	3a	14031212
Exp. 3	B	DOR	9	slow_regular	10	e2	3a_58	0	0.124	0.084	91.6	0.108	0.378	-0.973	A5	3a	14031212
Exp. 3	B	DOR	9	slow_regular	10	f2	3a_59	0	0.437	0.296	70.4	0.164	0.573	-0.557	A6	3a	14031212
Exp. 3	B	DOR	9	slow_regular	10	a2	3b_54	0	0.674	0.465	53.5	0.211	0.73	-0.315	A1	3b	1403101
Exp. 3	B	DOR	9	slow_regular	10	b2	3b_55	0	0.817	0.564	43.6	0.219	0.758	-0.277	A2	3b	1403101
Exp. 3	B	DOR	9	slow_regular	10	c2	3b_56	0	0.844	0.582	41.8	0.208	0.72	-0.329	A3	3b	1403101
Exp. 3	B	DOR	9	slow_regular	10	d2	3b_57	1	0.018	0.012	98.8	0.085	0.294	-1.224	A4	3b	1403101
Exp. 3	B	DOR	9	slow_regular	10	e2	3b_58	0	0.107	0.074	92.6	0.132	0.457	-0.783	A5	3b	1403101
Exp. 3	B	DOR	9	slow_regular	10	f2	3b_59	0	0.2	0.138	86.2	0.114	0.394	-0.931	A6	3b	1403101
Exp. 3	B	DOR	9	random	11	a2	3a_60	0	1.436	0.972	2.8	0.321	1.122	0.115	C1	3a	14031212
Exp. 3	B	DOR	9	random	11	b2	3a_61	1	-0.041	-0.028	102.8	0.075	0.262	-1.339	C2	3a	14031212
Exp. 3	B	DOR	9	random	11	c2	3a_62	1	-0.01	-0.007	100.7	0.078	0.273	-1.298	C3	3a	14031212
Exp. 3	B	DOR	9	random	11	d2	3a_63	0	1.109	0.75	25	0.234	0.818	-0.201	C4	3a	14031212
Exp. 3	B	DOR	9	random	11	e2	3a_64	1	0.051	0.035	96.5	0.101	0.353	-1.041	C5	3a	14031212
Exp. 3	B	DOR	9	random	11	f2	3a_65	1	-0.055	-0.037	103.7	0.088	0.308	-1.178	C6	3a	14031212
Exp. 3	B	DOR	9	random	11	a2	3b_60	0	1.463	1.01	-1	0.316	1.093	0.089	C1	3b	1403101
Exp. 3	B	DOR	9	random	11	b2	3b_61	1	-0.022	-0.015	101.5	0.077	0.266	-1.324	C2	3b	1403101
Exp. 3	B	DOR	9	random	11	c2	3b_62	1	-0.019	-0.013	101.3	0.079	0.273	-1.298	C3	3b	1403101
Exp. 3	B	DOR	9	random	11	d2	3b_63	0	0.93	0.642	35.8	0.221	0.765	-0.268	C4	3b	1403101
Exp. 3	B	DOR	9	random	11	e2	3b_64	0	0	0	100	0.08	0.277	-1.284	C5	3b	1403101
Exp. 3	B	DOR	9	random	11	f2	3b_65	1	-0.006	-0.004	100.4	0.086	0.298	-1.211	C6	3b	1403101
Exp. 3	C	CEF	9	random	12	a2	3a_66	0	1.092	0.739	26.1	0.256	0.895	-0.111	E1	3a	14031212
Exp. 3	C	CEF	9	random	12	b2	3a_67	0	0.061	0.041	95.9	0.141	0.493	-0.707	E2	3a	14031212
Exp. 3	C	CEF	9	random	12	c2	3a_68	0	1.03	0.697	30.3	0.252	0.881	-0.127	E3	3a	14031212
Exp. 3	C	CEF	9	random	12	d2	3a_69	1	0.134	0.091	90.9	0.115	0.402	-0.911	E4	3a	14031212
Exp. 3	C	CEF	9	random	12	e2	3a_70	0	1.311	0.887	11.3	0.319	1.115	0.109	E5	3a	14031212
Exp. 3	C	CEF	9	random	12	f2	3a_71	1	0.015	0.01	99	0.082	0.287	-1.248	E6	3a	14031212
Exp. 3	C	CEF	9	random	12	a2	3b_66	0	1.025	0.707	29.3	0.19	0.657	-0.42	E1	3b	1403101
Exp. 3	C	CEF	9	random	12	b2	3b_67	0	0.185	0.128	87.2	0.155	0.536	-0.624	E2	3b	1403101
Exp. 3	C	CEF	9	random	12	c2	3b_68	0	-0.022	-0.015	101.5	0.075	0.26	-1.347	E3	3b	1403101
Exp. 3	C	CEF	9	random	12	d2	3b_69	1	-0.033	-0.023	102.3	0.08	0.277	-1.284	E4	3b	1403101
Exp. 3	C	CEF	9	random	12	e2	3b_70	1	-0.063	-0.043	104.3	0.077	0.266	-1.324	E5	3b	1403101
Exp. 3	C	CEF	9	random	12	f2	3b_71	1	-0.055	-0.038	103.8	0.072	0.249	-1.39	E6	3b	1403101
Exp. 3	A	CAR	9	random	13	a2	3a_72	0	0.997	0.675	32.5	0.287	1.003	0.003	G1	3a	14031212
Exp. 3	A	CAR	9	random	13	b2	3a_73	0	0.678	0.459	54.1	0.173	0.605	-0.503	G2	3a	14031212
Exp. 3	A	CAR	9	random	13	c2	3a_74	1	-0.022	-0.015	101.5	0.083	0.29	-1.238	G3	3a	14031212
Exp. 3	A	CAR	9	random	13	d2	3a_75	0	1.257	0.85	15	0.242	0.846	-0.167	G4	3a	14031212
Exp. 3	A	CAR	9	random	13	e2	3a_76	0	0.915	0.619	38.1	0.191	0.668	-0.403	G5	3a	14031212
Exp. 3	A	CAR	9	random	13	f2	3a_77	1	0.005	0.003	99.7	0.08	0.28	-1.273	G6	3a	14031212
Exp. 3	A	CAR	9	random	13	a2	3b_72	0	0.937	0.647	35.3	0.267	0.924	-0.079	G1	3b	1403101
Exp. 3	A	CAR	9	random	13	b2	3b_73	1	-0.053	-0.037	103.7	0.083	0.287	-1.248	G2	3b	1403101
Exp. 3	A	CAR	9	random	13	c2	3b_74	0	1.289	0.89	11	0.259	0.896	-0.11	G3	3b	1403101
Exp. 3	A	CAR	9	random	13	d2	3b_75	0	1.166	0.805	19.5	0.241	0.834	-0.182	G4	3b	1403101
Exp. 3	A	CAR	9	random	13	e2	3b_76	0	0.998	0.689	31.1	0.231	0.799	-0.224	G5	3b	1403101
Exp. 3	A	CAR	9	random	13	f2	3b_77	1	0.044	0.03	97	0.095	0.329	-1.112	G6	3b	1403101
Exp. 3	A	CAR	9	random	14	a2	3a_78	0	1.097	0.742	25.8	0.222	0.776	-0.254	D1	3a	14031212
Exp. 3	A	CAR	9	random	14	b2	3a_79	1	-0.03	-0.02	102	0.078	0.273	-1.298	D2	3a	14031212
Exp. 3	A	CAR	9	random	14	c2	3a_80	0	1.587	1.074	-7.4	0.286	1	0	D3	3a	14031212
Exp. 3	A	CAR	9	random	14	d2	3a_81	0	1.704	1.153	-15.3	0.372	1.301	0.263	D4	3a	14031212
Exp. 3	A	CAR	9	random	14	e2	3a_82	1	0.001	0.001	99.9	0.081	0.283	-1.262	D5	3a	14031212
Exp. 3	A	CAR	9	random	14	f2	3a_83	0	0.925	0.626	37.4	0.216	0.755	-0.281	D6	3a	14031212
Exp. 3	A	CAR	9	random	14	a2	3b_78	0	1.069	0.738	26.2	0.223	0.772	-0.259	D1	3b	1403101
Exp. 3	A	CAR	9	random	14	b2	3b_79	1	-0.006	-0.004	100.4	0.076	0.263	-1.336	D2	3b	1403101
Exp. 3	A	CAR	9	random	14	c2	3b_80	0	1.324	0.914	8.6	0.274	0.948	-0.053	D3	3b	1403101
Exp. 3	A	CAR	9	random	14	d2	3b_81	0	1.383	0.954	4.6	0.275	0.952	-0.049	D4	3b	1403101
Exp. 3	A	CAR	9	random	14	e2	3b_82	1	-0.01	-0.007	100.7	0.077	0.266	-1.324	D5	3b	1403101
Exp. 3	A	CAR	9	random	14	f2	3b_83	0	0.768	0.53	47	0.186	0.644	-0.44	D6	3b	1403101
Exp. 3	B	DOR	9	random	15	a2	3a_84	1	-0.045	-0.03	103	0.085	0.297	-1.214	H1	3a	14031212
Exp. 3	B	DOR	9	random	15	b2	3a_85	1	-0.001	-0.001	100.1	0.081	0.283	-1.262	H2	3a	14031212
Exp. 3	B	DOR	9	random	15	c2	3a_86	0	0.928	0.628	37.2	0.255	0.892	-0.114	H3	3a	14031212
Exp. 3	B	DOR	9	random	15	d2	3a_87	1	0.047	0.032	96.8	0.079	0.276	-1.287	H4	3a	14031212
Exp. 3	B	DOR	9	random	15	e2	3a_88	0	1.275	0.863	13.7	0.318	1.112	0.106	H5	3a	14031212
Exp. 3	B	DOR	9	random	15	f2	3a_89	0	1.18	0.798	20.2	0.317	1.108	0.103	H6	3a	14031212
Exp. 3	B	DOR	9	random	15	a2	3b_84	1	-0.026	-0.018	101.8	0.077	0.266	-1.324	H1	3b	1403101
Exp. 3	B	DOR	9	random	15	b2	3b_85	1	-0.016	-0.011	101.1	0.079	0.273	-1.298	H2	3b	1403101
Exp. 3	B	DOR	9	random	15	c2	3b_86	1	-0.033	-0.023	102.3	0.081	0.28	-1.273	H3	3b	1403101
Exp. 3	B	DOR	9	random	15	d2	3b_87	1	-0.004	-0.003	100.3	0.082	0.284	-1.259	H4	3b	1403101
Exp. 3	B	DOR	9	random	15	e2	3b_88	0	1.38	0.952	4.8	0.305	1.055	0.054	H5	3b	1403101
Exp. 3	B	DOR	9	random	15	f2	3b_89	0	1.257	0.867	13.3	0.314	1.087	0.083	H6	3b	1403101
Exp. 3	C	CEF	9	random	16	a2	3a_90	0	1.109	0.75	25	0.312	1.091	0.087	H7	3a	14031212
Exp. 3	C	CEF	9	random	16	b2	3a_91	0	1.337	0.905	9.5	0.3	1.049	0.048	H8	3a	14031212
Exp. 3	C	CEF	9	random	16	c2	3a_92	0	0.996	0.674	32.6	0.277	0.969	-0.031	H9	3a	14031212
Exp. 3	C	CEF	9	random	16	d2	3a_93	1	-0.026	-0.018	101.8	0.074	0.259	-1.351	H10	3a	14031212
Exp. 3	C	CEF	9	random	16	e2	3a_94	0	1.342	0.908	9.2	0.305	1.066	0.064	H11	3a	14031212
Exp. 3	C	CEF	9	random	16	f2	3a_95	0	0.601	0.407	59.3	0.226	0.79	-0.236	H12	3a	14031212
Exp. 3	C	CEF	9	random	16	a2	3b_90	0	1.058	0.73	27	0.292	1.01	0.01	H7	3b	1403101
Exp. 3	C	CEF	9	random	16	b2	3b_91	0	1.307	0.902	9.8	0.306	1.059	0.057	H8	3b	1403101
Exp. 3	C	CEF	9	random	16	c2	3b_92	0	1.54	1.063	-6.3	0.304	1.052	0.051	H9	3b	1403101
Exp. 3	C	CEF	9	random	16	d2	3b_93	1	0.004	0.003	99.7	0.087	0.301	-1.201	H10	3b	1403101
Exp. 3	C	CEF	9	random	16	e2	3b_94	0	1.469	1.014	-1.4	0.304	1.052	0.051	H11	3b	1403101
Exp. 3	C	CEF	9	random	16	f2	3b_95	1	0.017	0.012	98.8	0.092	0.318	-1.146	H12	3b	1403101
Exp. 3	A	CAR	10	mono	1	a2	3a_1	0	1.115	0.719	28.1	0.234	0.796	-0.228	G7	3a	14031212
Exp. 3	A	CAR	10	mono	1	b2	3a_2	0	0.421	0.272	72.8	0.184	0.626	-0.468	G8	3a	14031212
Exp. 3	A	CAR	10	mono	1	c2	3a_3	0	1.345	0.868	13.2	0.263	0.895	-0.111	G9	3a	14031212
Exp. 3	A	CAR	10	mono	1	d2	3a_4	0	1.399	0.903	9.7	0.265	0.901	-0.104	G10	3a	14031212
Exp. 3	A	CAR	10	mono	1	e2	3a_5	1	-0.048	-0.031	103.1	0.072	0.245	-1.406	G11	3a	14031212
Exp. 3	A	CAR	10	mono	1	f2	3a_6	0	0.777	0.501	49.9	0.239	0.813	-0.207	G12	3a	14031212
Exp. 3	A	CAR	10	mono	1	a2	3b_1	0	1.246	0.795	20.5	0.247	0.832	-0.184	G7	3b	1403101
Exp. 3	A	CAR	10	mono	1	b2	3b_2	0	0.687	0.438	56.2	0.206	0.694	-0.365	G8	3b	1403101
Exp. 3	A	CAR	10	mono	1	c2	3b_3	0	1.58	1.008	-0.8	0.285	0.96	-0.041	G9	3b	1403101
Exp. 3	A	CAR	10	mono	1	d2	3b_4	0	1.432	0.913	8.7	0.297	1	0	G10	3b	1403101
Exp. 3	A	CAR	10	mono	1	e2	3b_5	0	0.864	0.551	44.9	0.224	0.754	-0.282	G11	3b	1403101
Exp. 3	A	CAR	10	mono	1	f2	3b_6	0	0.921	0.587	41.3	0.605	2.037	0.711	G12	3b	1403101
Exp. 3	B	DOR	10	mono	2	d2	3a_10	0	0.532	0.343	65.7	0.183	0.622	-0.475	B4	3a	14031212
Exp. 3	B	DOR	10	mono	2	e2	3a_11	0	1.242	0.801	19.9	0.257	0.874	-0.135	B5	3a	14031212
Exp. 3	B	DOR	10	mono	2	f2	3a_12	0	1.23	0.794	20.6	0.266	0.905	-0.1	B6	3a	14031212
Exp. 3	B	DOR	10	mono	2	a2	3a_7	0	0.588	0.379	62.1	0.211	0.718	-0.331	B1	3a	14031212
Exp. 3	B	DOR	10	mono	2	b2	3a_8	0	1.317	0.85	15	0.282	0.959	-0.042	B2	3a	14031212
Exp. 3	B	DOR	10	mono	2	c2	3a_9	0	1.424	0.919	8.1	0.279	0.949	-0.052	B3	3a	14031212
Exp. 3	B	DOR	10	mono	2	d2	3b_10	0	0.721	0.46	54	0.206	0.694	-0.365	B4	3b	1403101
Exp. 3	B	DOR	10	mono	2	e2	3b_11	0	1.189	0.758	24.2	0.256	0.862	-0.149	B5	3b	1403101
Exp. 3	B	DOR	10	mono	2	f2	3b_12	0	1.287	0.821	17.9	0.276	0.929	-0.074	B6	3b	1403101
Exp. 3	B	DOR	10	mono	2	a2	3b_7	0	1.152	0.735	26.5	0.257	0.865	-0.145	B1	3b	1403101
Exp. 3	B	DOR	10	mono	2	b2	3b_8	0	1.31	0.835	16.5	0.269	0.906	-0.099	B2	3b	1403101
Exp. 3	B	DOR	10	mono	2	c2	3b_9	0	1.35	0.861	13.9	0.28	0.943	-0.059	B3	3b	1403101
Exp. 3	C	CEF	10	mono	3	a2	3a_13	0	1.239	0.799	20.1	0.256	0.871	-0.138	E7	3a	14031212
Exp. 3	C	CEF	10	mono	3	b2	3a_14	0	1.333	0.86	14	0.27	0.918	-0.086	E8	3a	14031212
Exp. 3	C	CEF	10	mono	3	c2	3a_15	0	1.31	0.845	15.5	0.262	0.891	-0.115	E9	3a	14031212
Exp. 3	C	CEF	10	mono	3	d2	3a_16	0	1.337	0.863	13.7	0.268	0.912	-0.092	E10	3a	14031212
Exp. 3	C	CEF	10	mono	3	e2	3a_17	0	1.392	0.898	10.2	0.279	0.949	-0.052	E11	3a	14031212
Exp. 3	C	CEF	10	mono	3	f2	3a_18	0	1.009	0.651	34.9	0.241	0.82	-0.198	E12	3a	14031212
Exp. 3	C	CEF	10	mono	3	a2	3b_13	0	1.26	0.804	19.6	0.259	0.872	-0.137	E7	3b	1403101
Exp. 3	C	CEF	10	mono	3	b2	3b_14	0	1.438	0.917	8.3	0.277	0.933	-0.069	E8	3b	1403101
Exp. 3	C	CEF	10	mono	3	c2	3b_15	0	1.361	0.868	13.2	0.265	0.892	-0.114	E9	3b	1403101
Exp. 3	C	CEF	10	mono	3	d2	3b_16	1	-0.018	-0.011	101.1	0.068	0.229	-1.474	E10	3b	1403101
Exp. 3	C	CEF	10	mono	3	e2	3b_17	0	1.505	0.96	4	0.288	0.97	-0.03	E11	3b	1403101
Exp. 3	C	CEF	10	mono	3	f2	3b_18	0	1.049	0.669	33.1	0.263	0.886	-0.121	E12	3b	1403101
Exp. 3	A	CAR	10	fast_regular	5	a2	3a_24	0	1.199	0.774	22.6	0.229	0.779	-0.25	D7	3a	14031212
Exp. 3	A	CAR	10	fast_regular	5	b2	3a_25	1	0.004	0.003	99.7	0.077	0.262	-1.339	D8	3a	14031212
Exp. 3	A	CAR	10	fast_regular	5	c2	3a_26	1	-0.006	-0.004	100.4	0.075	0.255	-1.366	D9	3a	14031212
Exp. 3	A	CAR	10	fast_regular	5	d2	3a_27	0	1.584	1.022	-2.2	0.29	0.986	-0.014	D10	3a	14031212
Exp. 3	A	CAR	10	fast_regular	5	e2	3a_28	1	0.011	0.007	99.3	0.086	0.293	-1.228	D11	3a	14031212
Exp. 3	A	CAR	10	fast_regular	5	f2	3a_29	1	0.001	0.001	99.9	0.08	0.272	-1.302	D12	3a	14031212
Exp. 3	A	CAR	10	fast_regular	5	a2	3b_24	0	1.143	0.729	27.1	0.222	0.747	-0.292	D7	3b	1403101
Exp. 3	A	CAR	10	fast_regular	5	b2	3b_25	1	-0.041	-0.026	102.6	0.069	0.232	-1.461	D8	3b	1403101
Exp. 3	A	CAR	10	fast_regular	5	c2	3b_26	0	1.555	0.992	0.8	0.29	0.976	-0.024	D9	3b	1403101
Exp. 3	A	CAR	10	fast_regular	5	d2	3b_27	0	1.503	0.959	4.1	0.288	0.97	-0.03	D10	3b	1403101
Exp. 3	A	CAR	10	fast_regular	5	e2	3b_28	0	1.546	0.986	1.4	0.324	1.091	0.087	D11	3b	1403101
Exp. 3	A	CAR	10	fast_regular	5	f2	3b_29	1	0.035	0.022	97.8	0.083	0.279	-1.277	D12	3b	1403101
Exp. 3	B	DOR	10	fast_regular	6	a2	3a_30	0	0.691	0.446	55.4	0.182	0.619	-0.48	C1	3a	14031212
Exp. 3	B	DOR	10	fast_regular	6	b2	3a_31	0	0.512	0.33	67	0.19	0.646	-0.437	C2	3a	14031212
Exp. 3	B	DOR	10	fast_regular	6	c2	3a_32	1	-0.025	-0.016	101.6	0.082	0.279	-1.277	C3	3a	14031212
Exp. 3	B	DOR	10	fast_regular	6	d2	3a_33	0	0.009	0.006	99.4	0.082	0.279	-1.277	C4	3a	14031212
Exp. 3	B	DOR	10	fast_regular	6	e2	3a_34	1	-0.01	-0.006	100.6	0.088	0.299	-1.207	C5	3a	14031212
Exp. 3	B	DOR	10	fast_regular	6	f2	3a_35	1	-0.013	-0.008	100.8	0.076	0.259	-1.351	C6	3a	14031212
Exp. 3	B	DOR	10	fast_regular	6	a2	3b_30	0	0.5	0.319	68.1	0.179	0.603	-0.506	C1	3b	1403101
Exp. 3	B	DOR	10	fast_regular	6	b2	3b_31	0	0.388	0.247	75.3	0.223	0.751	-0.286	C2	3b	1403101
Exp. 3	B	DOR	10	fast_regular	6	c2	3b_32	1	0.01	0.006	99.4	0.081	0.273	-1.298	C3	3b	1403101
Exp. 3	B	DOR	10	fast_regular	6	d2	3b_33	1	0.024	0.015	98.5	0.083	0.279	-1.277	C4	3b	1403101
Exp. 3	B	DOR	10	fast_regular	6	e2	3b_34	0	1.017	0.649	35.1	0.231	0.778	-0.251	C5	3b	1403101
Exp. 3	B	DOR	10	fast_regular	6	f2	3b_35	0	0.023	0.015	98.5	0.086	0.29	-1.238	C6	3b	1403101
Exp. 3	C	CEF	10	fast_regular	7	a2	3a_36	0	1.115	0.719	28.1	0.261	0.888	-0.119	F1	3a	14031212
Exp. 3	C	CEF	10	fast_regular	7	b2	3a_37	0	1.3	0.839	16.1	0.276	0.939	-0.063	F2	3a	14031212
Exp. 3	C	CEF	10	fast_regular	7	c2	3a_38	0	0.785	0.506	49.4	0.313	1.065	0.063	F3	3a	14031212
Exp. 3	C	CEF	10	fast_regular	7	d2	3a_39	0	1.424	0.919	8.1	0.27	0.918	-0.086	F4	3a	14031212
Exp. 3	C	CEF	10	fast_regular	7	e2	3a_40	0	1.291	0.833	16.7	0.288	0.98	-0.02	F5	3a	14031212
Exp. 3	C	CEF	10	fast_regular	7	f2	3a_41	0	-0.025	-0.016	101.6	0.074	0.252	-1.378	F6	3a	14031212
Exp. 3	C	CEF	10	fast_regular	7	a2	3b_36	0	0.971	0.619	38.1	0.267	0.899	-0.106	F1	3b	1403101
Exp. 3	C	CEF	10	fast_regular	7	b2	3b_37	1	-0.021	-0.013	101.3	0.077	0.259	-1.351	F2	3b	1403101
Exp. 3	C	CEF	10	fast_regular	7	c2	3b_38	1	0.018	0.011	98.9	0.089	0.3	-1.204	F3	3b	1403101
Exp. 3	C	CEF	10	fast_regular	7	d2	3b_39	1	-0.002	-0.001	100.1	0.082	0.276	-1.287	F4	3b	1403101
Exp. 3	C	CEF	10	fast_regular	7	e2	3b_40	0	1.375	0.877	12.3	0.285	0.96	-0.041	F5	3b	1403101
Exp. 3	C	CEF	10	fast_regular	7	f2	3b_41	1	0.055	0.035	96.5	0.083	0.279	-1.277	F6	3b	1403101
Exp. 3	C	CEF	10	slow_regular	8	a2	3a_42	0	1.366	0.881	11.9	0.264	0.898	-0.108	B7	3a	14031212
Exp. 3	C	CEF	10	slow_regular	8	b2	3a_43	0	1.377	0.888	11.2	0.276	0.939	-0.063	B8	3a	14031212
Exp. 3	C	CEF	10	slow_regular	8	c2	3a_44	0	1.503	0.97	3	0.284	0.966	-0.035	B9	3a	14031212
Exp. 3	C	CEF	10	slow_regular	8	d2	3a_45	0	1.437	0.927	7.3	0.281	0.956	-0.045	B10	3a	14031212
Exp. 3	C	CEF	10	slow_regular	8	e2	3a_46	0	1.434	0.925	7.5	0.284	0.966	-0.035	B11	3a	14031212
Exp. 3	C	CEF	10	slow_regular	8	f2	3a_47	0	1.284	0.828	17.2	0.265	0.901	-0.104	B12	3a	14031212
Exp. 3	C	CEF	10	slow_regular	8	a2	3b_42	0	1.279	0.816	18.4	0.262	0.882	-0.126	B7	3b	1403101
Exp. 3	C	CEF	10	slow_regular	8	b2	3b_43	0	1.344	0.857	14.3	0.267	0.899	-0.106	B8	3b	1403101
Exp. 3	C	CEF	10	slow_regular	8	c2	3b_44	0	1.425	0.909	9.1	0.277	0.933	-0.069	B9	3b	1403101
Exp. 3	C	CEF	10	slow_regular	8	d2	3b_45	0	1.508	0.962	3.8	0.287	0.966	-0.035	B10	3b	1403101
Exp. 3	C	CEF	10	slow_regular	8	e2	3b_46	0	1.718	1.096	-9.6	0.334	1.125	0.118	B11	3b	1403101
Exp. 3	C	CEF	10	slow_regular	9	a2	3a_48	0	1.118	0.721	27.9	0.253	0.861	-0.15	A7	3a	14031212
Exp. 3	C	CEF	10	slow_regular	9	b2	3a_49	0	1.228	0.792	20.8	0.258	0.878	-0.13	A8	3a	14031212
Exp. 3	C	CEF	10	slow_regular	9	c2	3a_50	0	1.231	0.794	20.6	0.274	0.932	-0.07	A9	3a	14031212
Exp. 3	C	CEF	10	slow_regular	9	d2	3a_51	0	1.275	0.823	17.7	0.267	0.908	-0.097	A10	3a	14031212
Exp. 3	C	CEF	10	slow_regular	9	e2	3a_52	0	1.425	0.919	8.1	0.284	0.966	-0.035	A11	3a	14031212
Exp. 3	C	CEF	10	slow_regular	9	f2	3a_53	0	1.378	0.889	11.1	0.272	0.925	-0.078	A12	3a	14031212
Exp. 3	C	CEF	10	slow_regular	9	a2	3b_48	0	1.557	0.993	0.7	0.286	0.963	-0.038	A7	3b	1403101
Exp. 3	C	CEF	10	slow_regular	9	b2	3b_49	0	1.588	1.013	-1.3	0.327	1.101	0.096	A8	3b	1403101
Exp. 3	C	CEF	10	slow_regular	9	c2	3b_50	0	1.387	0.885	11.5	0.272	0.916	-0.088	A9	3b	1403101
Exp. 3	C	CEF	10	slow_regular	9	d2	3b_51	0	0.662	0.422	57.8	0.203	0.684	-0.38	A10	3b	1403101
Exp. 3	B	DOR	10	slow_regular	10	a2	3a_54	0	0.715	0.461	53.9	0.214	0.728	-0.317	A1	3a	14031212
Exp. 3	B	DOR	10	slow_regular	10	b2	3a_55	0	1.33	0.858	14.2	0.332	1.129	0.121	A2	3a	14031212
Exp. 3	B	DOR	10	slow_regular	10	c2	3a_56	0	1.239	0.799	20.1	0.28	0.952	-0.049	A3	3a	14031212
Exp. 3	B	DOR	10	slow_regular	10	d2	3a_57	1	-0.035	-0.023	102.3	0.079	0.269	-1.313	A4	3a	14031212
Exp. 3	B	DOR	10	slow_regular	10	e2	3a_58	0	1.173	0.757	24.3	0.321	1.092	0.088	A5	3a	14031212
Exp. 3	B	DOR	10	slow_regular	10	f2	3a_59	0	1.09	0.703	29.7	0.27	0.918	-0.086	A6	3a	14031212
Exp. 3	B	DOR	10	slow_regular	10	a2	3b_54	0	0.622	0.397	60.3	0.201	0.677	-0.39	A1	3b	1403101
Exp. 3	B	DOR	10	slow_regular	10	b2	3b_55	0	1.397	0.891	10.9	0.327	1.101	0.096	A2	3b	1403101
Exp. 3	B	DOR	10	slow_regular	10	c2	3b_56	0	1.231	0.785	21.5	0.268	0.902	-0.103	A3	3b	1403101
Exp. 3	B	DOR	10	slow_regular	10	d2	3b_57	1	-0.032	-0.02	102	0.082	0.276	-1.287	A4	3b	1403101
Exp. 3	B	DOR	10	slow_regular	10	e2	3b_58	0	1.466	0.935	6.5	0.346	1.165	0.153	A5	3b	1403101
Exp. 3	B	DOR	10	slow_regular	10	f2	3b_59	0	0.018	0.011	98.9	0.11	0.37	-0.994	A6	3b	1403101
Exp. 3	B	DOR	10	random	11	a2	3a_60	0	1.678	1.083	-8.3	0.342	1.163	0.151	D1	3a	14031212
Exp. 3	B	DOR	10	random	11	b2	3a_61	1	-0.045	-0.029	102.9	0.08	0.272	-1.302	D2	3a	14031212
Exp. 3	B	DOR	10	random	11	c2	3a_62	1	-0.051	-0.033	103.3	0.08	0.272	-1.302	D3	3a	14031212
Exp. 3	B	DOR	10	random	11	d2	3a_63	0	1.069	0.69	31	0.232	0.789	-0.237	D4	3a	14031212
Exp. 3	B	DOR	10	random	11	e2	3a_64	1	-0.061	-0.039	103.9	0.078	0.265	-1.328	D5	3a	14031212
Exp. 3	B	DOR	10	random	11	f2	3a_65	1	-0.04	-0.026	102.6	0.079	0.269	-1.313	D6	3a	14031212
Exp. 3	B	DOR	10	random	11	a2	3b_60	0	1.469	0.937	6.3	0.332	1.118	0.112	D1	3b	1403101
Exp. 3	B	DOR	10	random	11	b2	3b_61	1	-0.033	-0.021	102.1	0.085	0.286	-1.252	D2	3b	1403101
Exp. 3	B	DOR	10	random	11	c2	3b_62	1	0.001	0.001	99.9	0.087	0.293	-1.228	D3	3b	1403101
Exp. 3	B	DOR	10	random	11	d2	3b_63	0	0.859	0.548	45.2	0.228	0.768	-0.264	D4	3b	1403101
Exp. 3	B	DOR	10	random	11	e2	3b_64	0	-0.002	-0.001	100.1	0.082	0.276	-1.287	D5	3b	1403101
Exp. 3	B	DOR	10	random	11	f2	3b_65	1	-0.016	-0.01	101	0.081	0.273	-1.298	D6	3b	1403101
Exp. 3	B	DOR	10	random	12	a2	3a_66	0	0.598	0.386	61.4	0.185	0.629	-0.464	E1	3a	14031212
Exp. 3	B	DOR	10	random	12	b2	3a_67	0	0.536	0.346	65.4	0.199	0.677	-0.39	E2	3a	14031212
Exp. 3	B	DOR	10	random	12	c2	3a_68	0	1.282	0.827	17.3	0.268	0.912	-0.092	E3	3a	14031212
Exp. 3	B	DOR	10	random	12	d2	3a_69	1	0.082	0.053	94.7	0.116	0.395	-0.929	E4	3a	14031212
Exp. 3	B	DOR	10	random	12	e2	3a_70	0	0.767	0.495	50.5	0.199	0.677	-0.39	E5	3a	14031212
Exp. 3	B	DOR	10	random	12	f2	3a_71	1	0.019	0.012	98.8	0.082	0.279	-1.277	E6	3a	14031212
Exp. 3	B	DOR	10	random	12	a2	3b_66	0	0.399	0.254	74.6	0.141	0.475	-0.744	E1	3b	1403101
Exp. 3	B	DOR	10	random	12	b2	3b_67	0	0.703	0.448	55.2	0.201	0.677	-0.39	E2	3b	1403101
Exp. 3	B	DOR	10	random	12	c2	3b_68	0	-0.021	-0.013	101.3	0.077	0.259	-1.351	E3	3b	1403101
Exp. 3	B	DOR	10	random	12	d2	3b_69	1	-0.033	-0.021	102.1	0.082	0.276	-1.287	E4	3b	1403101
Exp. 3	B	DOR	10	random	12	e2	3b_70	1	-0.044	-0.028	102.8	0.081	0.273	-1.298	E5	3b	1403101
Exp. 3	B	DOR	10	random	12	f2	3b_71	1	-0.042	-0.027	102.7	0.089	0.3	-1.204	E6	3b	1403101
Exp. 3	B	DOR	10	random	13	a2	3a_72	0	1.066	0.688	31.2	0.317	1.078	0.075	G1	3a	14031212
Exp. 3	B	DOR	10	random	13	b2	3a_73	0	0.303	0.195	80.5	0.237	0.806	-0.216	G2	3a	14031212
Exp. 3	B	DOR	10	random	13	c2	3a_74	1	-0.039	-0.025	102.5	0.079	0.269	-1.313	G3	3a	14031212
Exp. 3	B	DOR	10	random	13	d2	3a_75	0	1.488	0.96	4	0.282	0.959	-0.042	G4	3a	14031212
Exp. 3	B	DOR	10	random	13	e2	3a_76	0	0.317	0.205	79.5	0.233	0.793	-0.232	G5	3a	14031212
Exp. 3	B	DOR	10	random	13	f2	3a_77	1	-0.042	-0.027	102.7	0.078	0.265	-1.328	G6	3a	14031212
Exp. 3	B	DOR	10	random	13	a2	3b_72	0	1.117	0.712	28.8	0.311	1.047	0.046	G1	3b	1403101
Exp. 3	B	DOR	10	random	13	b2	3b_73	1	-0.016	-0.01	101	0.082	0.276	-1.287	G2	3b	1403101
Exp. 3	B	DOR	10	random	13	c2	3b_74	0	1.044	0.666	33.4	0.256	0.862	-0.149	G3	3b	1403101
Exp. 3	B	DOR	10	random	13	d2	3b_75	0	1.468	0.936	6.4	0.287	0.966	-0.035	G4	3b	1403101
Exp. 3	B	DOR	10	random	13	e2	3b_76	0	0.85	0.542	45.8	0.225	0.758	-0.277	G5	3b	1403101
Exp. 3	B	DOR	10	random	13	f2	3b_77	1	0.037	0.024	97.6	0.087	0.293	-1.228	G6	3b	1403101
Exp. 3	A	CAR	10	random	14	a2	3a_78	0	1.038	0.67	33	0.224	0.762	-0.272	C7	3a	14031212
Exp. 3	A	CAR	10	random	14	b2	3a_79	1	-0.049	-0.032	103.2	0.074	0.252	-1.378	C8	3a	14031212
Exp. 3	A	CAR	10	random	14	c2	3a_80	0	1.624	1.048	-4.8	0.33	1.122	0.115	C9	3a	14031212
Exp. 3	A	CAR	10	random	14	d2	3a_81	0	1.37	0.884	11.6	0.283	0.963	-0.038	C10	3a	14031212
Exp. 3	A	CAR	10	random	14	e2	3a_82	1	0.005	0.003	99.7	0.086	0.293	-1.228	C11	3a	14031212
Exp. 3	A	CAR	10	random	14	f2	3a_83	0	0.742	0.479	52.1	0.164	0.558	-0.583	C12	3a	14031212
Exp. 3	A	CAR	10	random	14	a2	3b_78	0	1.156	0.737	26.3	0.242	0.815	-0.205	C7	3b	1403101
Exp. 3	A	CAR	10	random	14	b2	3b_79	1	0.022	0.014	98.6	0.08	0.269	-1.313	C8	3b	1403101
Exp. 3	A	CAR	10	random	14	c2	3b_80	0	1.55	0.989	1.1	0.321	1.081	0.078	C9	3b	1403101
Exp. 3	A	CAR	10	random	14	d2	3b_81	0	1.428	0.911	8.9	0.279	0.939	-0.063	C10	3b	1403101
Exp. 3	A	CAR	10	random	14	e2	3b_82	1	0.042	0.027	97.3	0.091	0.306	-1.184	C11	3b	1403101
Exp. 3	A	CAR	10	random	14	f2	3b_83	0	1.125	0.717	28.3	0.389	1.31	0.27	C12	3b	1403101
Exp. 3	B	DOR	10	random	15	a2	3a_84	1	-0.006	-0.004	100.4	0.085	0.289	-1.241	H1	3a	14031212
Exp. 3	B	DOR	10	random	15	b2	3a_85	1	0.008	0.005	99.5	0.082	0.279	-1.277	H2	3a	14031212
Exp. 3	B	DOR	10	random	15	c2	3a_86	0	1.011	0.652	34.8	0.251	0.854	-0.158	H3	3a	14031212
Exp. 3	B	DOR	10	random	15	d2	3a_87	1	-0.014	-0.009	100.9	0.082	0.279	-1.277	H4	3a	14031212
Exp. 3	B	DOR	10	random	15	e2	3a_88	0	1.205	0.777	22.3	0.282	0.959	-0.042	H5	3a	14031212
Exp. 3	B	DOR	10	random	15	f2	3a_89	0	1.221	0.788	21.2	0.325	1.105	0.1	H6	3a	14031212
Exp. 3	B	DOR	10	random	15	a2	3b_84	1	-0.016	-0.01	101	0.076	0.256	-1.363	H1	3b	1403101
Exp. 3	B	DOR	10	random	15	b2	3b_85	1	-0.004	-0.003	100.3	0.08	0.269	-1.313	H2	3b	1403101
Exp. 3	B	DOR	10	random	15	c2	3b_86	1	-0.018	-0.011	101.1	0.082	0.276	-1.287	H3	3b	1403101
Exp. 3	B	DOR	10	random	15	d2	3b_87	1	-0.014	-0.009	100.9	0.081	0.273	-1.298	H4	3b	1403101
Exp. 3	B	DOR	10	random	15	e2	3b_88	0	1.318	0.841	15.9	0.303	1.02	0.02	H5	3b	1403101
Exp. 3	B	DOR	10	random	15	f2	3b_89	0	1.336	0.852	14.8	0.334	1.125	0.118	H6	3b	1403101
Exp. 3	A	CAR	10	random	16	a2	3a_90	0	1.01	0.652	34.8	0.284	0.966	-0.035	H7	3a	14031212
Exp. 3	A	CAR	10	random	16	b2	3a_91	0	0.826	0.533	46.7	0.203	0.69	-0.371	H8	3a	14031212
Exp. 3	A	CAR	10	random	16	c2	3a_92	0	1.087	0.701	29.9	0.243	0.827	-0.19	H9	3a	14031212
Exp. 3	A	CAR	10	random	16	d2	3a_93	1	-0.005	-0.003	100.3	0.079	0.269	-1.313	H10	3a	14031212
Exp. 3	A	CAR	10	random	16	e2	3a_94	0	0.886	0.572	42.8	0.213	0.724	-0.323	H11	3a	14031212
Exp. 3	A	CAR	10	random	16	f2	3a_95	0	0.501	0.323	67.7	0.148	0.503	-0.687	H12	3a	14031212
Exp. 3	A	CAR	10	random	16	a2	3b_90	0	0.923	0.589	41.1	0.29	0.976	-0.024	H7	3b	1403101
Exp. 3	A	CAR	10	random	16	b2	3b_91	0	0.883	0.563	43.7	0.208	0.7	-0.357	H8	3b	1403101
Exp. 3	A	CAR	10	random	16	c2	3b_92	0	1.239	0.79	21	0.257	0.865	-0.145	H9	3b	1403101
Exp. 3	A	CAR	10	random	16	d2	3b_93	1	0.01	0.006	99.4	0.085	0.286	-1.252	H10	3b	1403101
Exp. 3	A	CAR	10	random	16	e2	3b_94	0	0.956	0.61	39	0.228	0.768	-0.264	H11	3b	1403101
Exp. 3	A	CAR	10	random	16	f2	3b_95	1	-0.047	-0.03	103	0.078	0.263	-1.336	H12	3b	1403101
Exp. 3	A	CAR	11	mono	1	a2	3a_1	0	1.039	0.677	32.3	0.215	0.744	-0.296	G7	3a	14031212
Exp. 3	A	CAR	11	mono	1	b2	3a_2	0	0.543	0.354	64.6	0.194	0.671	-0.399	G8	3a	14031212
Exp. 3	A	CAR	11	mono	1	c2	3a_3	0	1.303	0.849	15.1	0.267	0.924	-0.079	G9	3a	14031212
Exp. 3	A	CAR	11	mono	1	d2	3a_4	0	1.334	0.869	13.1	0.255	0.882	-0.126	G10	3a	14031212
Exp. 3	A	CAR	11	mono	1	e2	3a_5	1	-0.068	-0.044	104.4	0.074	0.256	-1.363	G11	3a	14031212
Exp. 3	A	CAR	11	mono	1	f2	3a_6	0	0.886	0.577	42.3	0.179	0.619	-0.48	G12	3a	14031212
Exp. 3	A	CAR	11	mono	1	a2	3b_1	0	1.143	0.739	26.1	0.221	0.765	-0.268	G7	3b	1403101
Exp. 3	A	CAR	11	mono	1	b2	3b_2	0	0.72	0.465	53.5	0.23	0.796	-0.228	G8	3b	1403101
Exp. 3	A	CAR	11	mono	1	c2	3b_3	0	1.472	0.952	4.8	0.268	0.927	-0.076	G9	3b	1403101
Exp. 3	A	CAR	11	mono	1	d2	3b_4	0	1.4	0.905	9.5	0.283	0.979	-0.021	G10	3b	1403101
Exp. 3	A	CAR	11	mono	1	e2	3b_5	0	0.341	0.22	78	0.15	0.519	-0.656	G11	3b	1403101
Exp. 3	A	CAR	11	mono	1	f2	3b_6	0	0.642	0.415	58.5	0.334	1.156	0.145	G12	3b	1403101
Exp. 3	B	DOR	11	mono	2	d2	3a_10	0	0.557	0.363	63.7	0.178	0.616	-0.485	B4	3a	14031212
Exp. 3	B	DOR	11	mono	2	e2	3a_11	0	1.3	0.847	15.3	0.26	0.9	-0.105	B5	3a	14031212
Exp. 3	B	DOR	11	mono	2	f2	3a_12	0	1.355	0.883	11.7	0.27	0.934	-0.068	B6	3a	14031212
Exp. 3	B	DOR	11	mono	2	a2	3a_7	0	0.749	0.488	51.2	0.217	0.751	-0.286	B1	3a	14031212
Exp. 3	B	DOR	11	mono	2	b2	3a_8	0	1.362	0.887	11.3	0.273	0.945	-0.057	B2	3a	14031212
Exp. 3	B	DOR	11	mono	2	c2	3a_9	0	1.467	0.956	4.4	0.281	0.972	-0.028	B3	3a	14031212
Exp. 3	B	DOR	11	mono	2	d2	3b_10	0	0.72	0.465	53.5	0.196	0.678	-0.389	B4	3b	1403101
Exp. 3	B	DOR	11	mono	2	e2	3b_11	0	1.197	0.774	22.6	0.254	0.879	-0.129	B5	3b	1403101
Exp. 3	B	DOR	11	mono	2	f2	3b_12	0	1.362	0.88	12	0.271	0.938	-0.064	B6	3b	1403101
Exp. 3	B	DOR	11	mono	2	a2	3b_7	0	0.748	0.484	51.6	0.217	0.751	-0.286	B1	3b	1403101
Exp. 3	B	DOR	11	mono	2	b2	3b_8	0	1.356	0.877	12.3	0.274	0.948	-0.053	B2	3b	1403101
Exp. 3	B	DOR	11	mono	2	c2	3b_9	0	1.401	0.906	9.4	0.275	0.952	-0.049	B3	3b	1403101
Exp. 3	C	CEF	11	mono	3	a2	3a_13	0	1.219	0.794	20.6	0.251	0.869	-0.14	E7	3a	14031212
Exp. 3	C	CEF	11	mono	3	b2	3a_14	0	1.403	0.914	8.6	0.266	0.92	-0.083	E8	3a	14031212
Exp. 3	C	CEF	11	mono	3	c2	3a_15	0	1.353	0.881	11.9	0.262	0.907	-0.098	E9	3a	14031212
Exp. 3	C	CEF	11	mono	3	d2	3a_16	0	1.33	0.866	13.4	0.244	0.844	-0.17	E10	3a	14031212
Exp. 3	C	CEF	11	mono	3	e2	3a_17	0	1.409	0.918	8.2	0.269	0.931	-0.071	E11	3a	14031212
Exp. 3	C	CEF	11	mono	3	f2	3a_18	0	0.92	0.599	40.1	0.218	0.754	-0.282	E12	3a	14031212
Exp. 3	C	CEF	11	mono	3	a2	3b_13	0	1.224	0.791	20.9	0.261	0.903	-0.102	E7	3b	1403101
Exp. 3	C	CEF	11	mono	3	b2	3b_14	0	1.448	0.936	6.4	0.281	0.972	-0.028	E8	3b	1403101
Exp. 3	C	CEF	11	mono	3	c2	3b_15	0	1.334	0.862	13.8	0.253	0.875	-0.134	E9	3b	1403101
Exp. 3	C	CEF	11	mono	3	d2	3b_16	1	-0.075	-0.048	104.8	0.064	0.221	-1.51	E10	3b	1403101
Exp. 3	C	CEF	11	mono	3	e2	3b_17	0	1.483	0.959	4.1	0.278	0.962	-0.039	E11	3b	1403101
Exp. 3	C	CEF	11	mono	3	f2	3b_18	0	1.027	0.664	33.6	0.25	0.865	-0.145	E12	3b	1403101
Exp. 3	B	DOR	11	fast_regular	5	a2	3a_24	0	1.371	0.893	10.7	0.281	0.972	-0.028	E1	3a	14031212
Exp. 3	B	DOR	11	fast_regular	5	b2	3a_25	1	-0.019	-0.012	101.2	0.081	0.28	-1.273	E2	3a	14031212
Exp. 3	B	DOR	11	fast_regular	5	c2	3a_26	1	-0.037	-0.024	102.4	0.081	0.28	-1.273	E3	3a	14031212
Exp. 3	B	DOR	11	fast_regular	5	d2	3a_27	0	1.109	0.722	27.8	0.222	0.768	-0.264	E4	3a	14031212
Exp. 3	B	DOR	11	fast_regular	5	e2	3a_28	1	-0.066	-0.043	104.3	0.078	0.27	-1.309	E5	3a	14031212
Exp. 3	B	DOR	11	fast_regular	5	f2	3a_29	1	0.032	0.021	97.9	0.082	0.284	-1.259	E6	3a	14031212
Exp. 3	B	DOR	11	fast_regular	5	a2	3b_24	0	1.359	0.878	12.2	0.284	0.983	-0.017	E1	3b	1403101
Exp. 3	B	DOR	11	fast_regular	5	b2	3b_25	1	-0.032	-0.021	102.1	0.079	0.273	-1.298	E2	3b	1403101
Exp. 3	B	DOR	11	fast_regular	5	c2	3b_26	0	0.958	0.619	38.1	0.203	0.702	-0.354	E3	3b	1403101
Exp. 3	B	DOR	11	fast_regular	5	d2	3b_27	0	0.994	0.643	35.7	0.207	0.716	-0.334	E4	3b	1403101
Exp. 3	B	DOR	11	fast_regular	5	e2	3b_28	0	1.093	0.707	29.3	0.239	0.827	-0.19	E5	3b	1403101
Exp. 3	B	DOR	11	fast_regular	5	f2	3b_29	1	-0.086	-0.056	105.6	0.073	0.253	-1.374	E6	3b	1403101
Exp. 3	A	CAR	11	fast_regular	6	a2	3a_30	0	1.205	0.785	21.5	0.267	0.924	-0.079	C7	3a	14031212
Exp. 3	A	CAR	11	fast_regular	6	b2	3a_31	0	0.671	0.437	56.3	0.175	0.606	-0.501	C8	3a	14031212
Exp. 3	A	CAR	11	fast_regular	6	c2	3a_32	1	0.002	0.001	99.9	0.082	0.284	-1.259	C9	3a	14031212
Exp. 3	A	CAR	11	fast_regular	6	d2	3a_33	0	0.002	0.001	99.9	0.083	0.287	-1.248	C10	3a	14031212
Exp. 3	A	CAR	11	fast_regular	6	e2	3a_34	1	-0.005	-0.003	100.3	0.092	0.318	-1.146	C11	3a	14031212
Exp. 3	A	CAR	11	fast_regular	6	f2	3a_35	1	-0.014	-0.009	100.9	0.08	0.277	-1.284	C12	3a	14031212
Exp. 3	A	CAR	11	fast_regular	6	a2	3b_30	0	1.222	0.79	21	0.275	0.952	-0.049	C7	3b	1403101
Exp. 3	A	CAR	11	fast_regular	6	b2	3b_31	0	0.624	0.403	59.7	0.131	0.453	-0.792	C8	3b	1403101
Exp. 3	A	CAR	11	fast_regular	6	c2	3b_32	1	-0.033	-0.021	102.1	0.084	0.291	-1.234	C9	3b	1403101
Exp. 3	A	CAR	11	fast_regular	6	d2	3b_33	1	0.034	0.022	97.8	0.099	0.343	-1.07	C10	3b	1403101
Exp. 3	A	CAR	11	fast_regular	6	e2	3b_34	0	1.426	0.922	7.8	0.297	1.028	0.028	C11	3b	1403101
Exp. 3	A	CAR	11	fast_regular	6	f2	3b_35	0	0.059	0.038	96.2	0.095	0.329	-1.112	C12	3b	1403101
Exp. 3	A	CAR	11	fast_regular	7	a2	3a_36	0	1.013	0.66	34	0.252	0.872	-0.137	F1	3a	14031212
Exp. 3	A	CAR	11	fast_regular	7	b2	3a_37	0	0.989	0.644	35.6	0.209	0.723	-0.324	F2	3a	14031212
Exp. 3	A	CAR	11	fast_regular	7	c2	3a_38	0	1.706	1.111	-11.1	0.301	1.042	0.041	F3	3a	14031212
Exp. 3	A	CAR	11	fast_regular	7	d2	3a_39	0	1.221	0.795	20.5	0.228	0.789	-0.237	F4	3a	14031212
Exp. 3	A	CAR	11	fast_regular	7	e2	3a_40	0	1.248	0.813	18.7	0.234	0.81	-0.211	F5	3a	14031212
Exp. 3	A	CAR	11	fast_regular	7	f2	3a_41	0	-0.046	-0.03	103	0.081	0.28	-1.273	F6	3a	14031212
Exp. 3	A	CAR	11	fast_regular	7	a2	3b_36	0	0.958	0.619	38.1	0.246	0.851	-0.161	F1	3b	1403101
Exp. 3	A	CAR	11	fast_regular	7	b2	3b_37	1	-0.042	-0.027	102.7	0.077	0.266	-1.324	F2	3b	1403101
Exp. 3	A	CAR	11	fast_regular	7	c2	3b_38	1	-0.019	-0.012	101.2	0.083	0.287	-1.248	F3	3b	1403101
Exp. 3	A	CAR	11	fast_regular	7	d2	3b_39	1	0.024	0.016	98.4	0.077	0.266	-1.324	F4	3b	1403101
Exp. 3	A	CAR	11	fast_regular	7	e2	3b_40	0	1.232	0.796	20.4	0.238	0.824	-0.194	F5	3b	1403101
Exp. 3	A	CAR	11	fast_regular	7	f2	3b_41	1	0.001	0.001	99.9	0.073	0.253	-1.374	F6	3b	1403101
Exp. 3	C	CEF	11	slow_regular	8	a2	3a_42	0	1.366	0.89	11	0.262	0.907	-0.098	B7	3a	14031212
Exp. 3	C	CEF	11	slow_regular	8	b2	3a_43	0	1.372	0.894	10.6	0.269	0.931	-0.071	B8	3a	14031212
Exp. 3	C	CEF	11	slow_regular	8	c2	3a_44	0	1.529	0.996	0.4	0.284	0.983	-0.017	B9	3a	14031212
Exp. 3	C	CEF	11	slow_regular	8	d2	3a_45	0	1.481	0.965	3.5	0.277	0.958	-0.043	B10	3a	14031212
Exp. 3	C	CEF	11	slow_regular	8	e2	3a_46	0	1.374	0.895	10.5	0.28	0.969	-0.031	B11	3a	14031212
Exp. 3	C	CEF	11	slow_regular	8	f2	3a_47	0	1.258	0.82	18	0.278	0.962	-0.039	B12	3a	14031212
Exp. 3	C	CEF	11	slow_regular	8	a2	3b_42	0	1.318	0.852	14.8	0.248	0.858	-0.153	B7	3b	1403101
Exp. 3	C	CEF	11	slow_regular	8	b2	3b_43	0	1.196	0.773	22.7	0.252	0.872	-0.137	B8	3b	1403101
Exp. 3	C	CEF	11	slow_regular	8	c2	3b_44	0	1.422	0.919	8.1	0.275	0.952	-0.049	B9	3b	1403101
Exp. 3	C	CEF	11	slow_regular	8	d2	3b_45	0	1.525	0.986	1.4	0.281	0.972	-0.028	B10	3b	1403101
Exp. 3	C	CEF	11	slow_regular	8	e2	3b_46	0	1.564	1.011	-1.1	0.306	1.059	0.057	B11	3b	1403101
Exp. 3	C	CEF	11	slow_regular	9	a2	3a_48	0	1.097	0.715	28.5	0.247	0.855	-0.157	A7	3a	14031212
Exp. 3	C	CEF	11	slow_regular	9	b2	3a_49	0	1.255	0.818	18.2	0.259	0.896	-0.11	A8	3a	14031212
Exp. 3	C	CEF	11	slow_regular	9	c2	3a_50	0	1.364	0.889	11.1	0.268	0.927	-0.076	A9	3a	14031212
Exp. 3	C	CEF	11	slow_regular	9	d2	3a_51	0	1.317	0.858	14.2	0.267	0.924	-0.079	A10	3a	14031212
Exp. 3	C	CEF	11	slow_regular	9	e2	3a_52	0	1.502	0.979	2.1	0.283	0.979	-0.021	A11	3a	14031212
Exp. 3	C	CEF	11	slow_regular	9	f2	3a_53	0	1.4	0.912	8.8	0.274	0.948	-0.053	A12	3a	14031212
Exp. 3	C	CEF	11	slow_regular	9	a2	3b_48	0	1.506	0.973	2.7	0.287	0.993	-0.007	A7	3b	1403101
Exp. 3	C	CEF	11	slow_regular	9	b2	3b_49	0	1.516	0.98	2	0.337	1.166	0.154	A8	3b	1403101
Exp. 3	C	CEF	11	slow_regular	9	c2	3b_50	0	1.32	0.853	14.7	0.281	0.972	-0.028	A9	3b	1403101
Exp. 3	C	CEF	11	slow_regular	9	d2	3b_51	0	0.691	0.447	55.3	0.334	1.156	0.145	A10	3b	1403101
Exp. 3	B	DOR	11	slow_regular	10	a2	3a_54	0	0.723	0.471	52.9	0.21	0.727	-0.319	A1	3a	14031212
Exp. 3	B	DOR	11	slow_regular	10	b2	3a_55	0	1.552	1.011	-1.1	0.33	1.142	0.133	A2	3a	14031212
Exp. 3	B	DOR	11	slow_regular	10	c2	3a_56	0	1.351	0.88	12	0.281	0.972	-0.028	A3	3a	14031212
Exp. 3	B	DOR	11	slow_regular	10	d2	3a_57	1	-0.022	-0.014	101.4	0.073	0.253	-1.374	A4	3a	14031212
Exp. 3	B	DOR	11	slow_regular	10	e2	3a_58	0	1.515	0.987	1.3	0.29	1.003	0.003	A5	3a	14031212
Exp. 3	B	DOR	11	slow_regular	10	f2	3a_59	0	1.443	0.94	6	0.284	0.983	-0.017	A6	3a	14031212
Exp. 3	B	DOR	11	slow_regular	10	a2	3b_54	0	0.541	0.35	65	0.203	0.702	-0.354	A1	3b	1403101
Exp. 3	B	DOR	11	slow_regular	10	b2	3b_55	0	1.537	0.994	0.6	0.329	1.138	0.129	A2	3b	1403101
Exp. 3	B	DOR	11	slow_regular	10	c2	3b_56	0	1.403	0.907	9.3	0.324	1.121	0.114	A3	3b	1403101
Exp. 3	B	DOR	11	slow_regular	10	d2	3b_57	1	0.018	0.012	98.8	0.085	0.294	-1.224	A4	3b	1403101
Exp. 3	B	DOR	11	slow_regular	10	e2	3b_58	0	1.487	0.961	3.9	0.29	1.003	0.003	A5	3b	1403101
Exp. 3	B	DOR	11	slow_regular	10	f2	3b_59	0	1.153	0.745	25.5	0.284	0.983	-0.017	A6	3b	1403101
Exp. 3	B	DOR	11	random	11	a2	3a_60	0	1.41	0.919	8.1	0.289	1	0	C1	3a	14031212
Exp. 3	B	DOR	11	random	11	b2	3a_61	1	-0.034	-0.022	102.2	0.073	0.253	-1.374	C2	3a	14031212
Exp. 3	B	DOR	11	random	11	c2	3a_62	1	-0.044	-0.029	102.9	0.08	0.277	-1.284	C3	3a	14031212
Exp. 3	B	DOR	11	random	11	d2	3a_63	0	0.928	0.605	39.5	0.218	0.754	-0.282	C4	3a	14031212
Exp. 3	B	DOR	11	random	11	e2	3a_64	1	-0.008	-0.005	100.5	0.088	0.304	-1.191	C5	3a	14031212
Exp. 3	B	DOR	11	random	11	f2	3a_65	1	-0.01	-0.007	100.7	0.083	0.287	-1.248	C6	3a	14031212
Exp. 3	B	DOR	11	random	11	a2	3b_60	0	1.397	0.903	9.7	0.289	1	0	C1	3b	1403101
Exp. 3	B	DOR	11	random	11	b2	3b_61	1	-0.034	-0.022	102.2	0.083	0.287	-1.248	C2	3b	1403101
Exp. 3	B	DOR	11	random	11	c2	3b_62	1	0.054	0.035	96.5	0.085	0.294	-1.224	C3	3b	1403101
Exp. 3	B	DOR	11	random	11	d2	3b_63	0	0.956	0.618	38.2	0.229	0.792	-0.233	C4	3b	1403101
Exp. 3	B	DOR	11	random	11	e2	3b_64	0	0.015	0.01	99	0.083	0.287	-1.248	C5	3b	1403101
Exp. 3	B	DOR	11	random	11	f2	3b_65	1	-0.003	-0.002	100.2	0.085	0.294	-1.224	C6	3b	1403101
Exp. 3	A	CAR	11	random	12	a2	3a_66	0	1.104	0.719	28.1	0.26	0.9	-0.105	D7	3a	14031212
Exp. 3	A	CAR	11	random	12	b2	3a_67	0	0.475	0.309	69.1	0.148	0.512	-0.669	D8	3a	14031212
Exp. 3	A	CAR	11	random	12	c2	3a_68	0	0.971	0.633	36.7	0.181	0.626	-0.468	D9	3a	14031212
Exp. 3	A	CAR	11	random	12	d2	3a_69	1	0.484	0.315	68.5	0.174	0.602	-0.507	D10	3a	14031212
Exp. 3	A	CAR	11	random	12	e2	3a_70	0	1.287	0.838	16.2	0.275	0.952	-0.049	D11	3a	14031212
Exp. 3	A	CAR	11	random	12	f2	3a_71	1	0.009	0.006	99.4	0.08	0.277	-1.284	D12	3a	14031212
Exp. 3	A	CAR	11	random	12	a2	3b_66	0	1.247	0.806	19.4	0.27	0.934	-0.068	D7	3b	1403101
Exp. 3	A	CAR	11	random	12	b2	3b_67	0	0.615	0.398	60.2	0.156	0.54	-0.616	D8	3b	1403101
Exp. 3	A	CAR	11	random	12	c2	3b_68	0	-0.01	-0.006	100.6	0.085	0.294	-1.224	D9	3b	1403101
Exp. 3	A	CAR	11	random	12	d2	3b_69	1	-0.057	-0.037	103.7	0.072	0.249	-1.39	D10	3b	1403101
Exp. 3	A	CAR	11	random	12	e2	3b_70	1	0.048	0.031	96.9	0.084	0.291	-1.234	D11	3b	1403101
Exp. 3	A	CAR	11	random	12	f2	3b_71	1	0.015	0.01	99	0.083	0.287	-1.248	D12	3b	1403101
Exp. 3	C	CEF	11	random	13	a2	3a_72	0	1.014	0.661	33.9	0.303	1.048	0.047	G1	3a	14031212
Exp. 3	C	CEF	11	random	13	b2	3a_73	0	1.319	0.859	14.1	0.277	0.958	-0.043	G2	3a	14031212
Exp. 3	C	CEF	11	random	13	c2	3a_74	1	-0.044	-0.029	102.9	0.083	0.287	-1.248	G3	3a	14031212
Exp. 3	C	CEF	11	random	13	d2	3a_75	0	1.311	0.854	14.6	0.254	0.879	-0.129	G4	3a	14031212
Exp. 3	C	CEF	11	random	13	e2	3a_76	0	1.387	0.904	9.6	0.273	0.945	-0.057	G5	3a	14031212
Exp. 3	C	CEF	11	random	13	f2	3a_77	1	-0.002	-0.001	100.1	0.079	0.273	-1.298	G6	3a	14031212
Exp. 3	C	CEF	11	random	13	a2	3b_72	0	0.969	0.626	37.4	0.261	0.903	-0.102	G1	3b	1403101
Exp. 3	C	CEF	11	random	13	b2	3b_73	1	-0.024	-0.016	101.6	0.081	0.28	-1.273	G2	3b	1403101
Exp. 3	C	CEF	11	random	13	c2	3b_74	0	1.196	0.773	22.7	0.261	0.903	-0.102	G3	3b	1403101
Exp. 3	C	CEF	11	random	13	d2	3b_75	0	1.332	0.861	13.9	0.242	0.837	-0.178	G4	3b	1403101
Exp. 3	C	CEF	11	random	13	e2	3b_76	0	1.378	0.891	10.9	0.269	0.931	-0.071	G5	3b	1403101
Exp. 3	C	CEF	11	random	13	f2	3b_77	1	0.062	0.04	96	0.088	0.304	-1.191	G6	3b	1403101
Exp. 3	B	DOR	11	random	14	a2	3a_78	0	1.379	0.898	10.2	0.285	0.986	-0.014	D1	3a	14031212
Exp. 3	B	DOR	11	random	14	b2	3a_79	1	0.005	0.003	99.7	0.096	0.332	-1.103	D2	3a	14031212
Exp. 3	B	DOR	11	random	14	c2	3a_80	0	1.049	0.683	31.7	0.224	0.775	-0.255	D3	3a	14031212
Exp. 3	B	DOR	11	random	14	d2	3a_81	0	0.959	0.625	37.5	0.198	0.685	-0.378	D4	3a	14031212
Exp. 3	B	DOR	11	random	14	e2	3a_82	1	-0.046	-0.03	103	0.083	0.287	-1.248	D5	3a	14031212
Exp. 3	B	DOR	11	random	14	f2	3a_83	0	0.262	0.171	82.9	0.147	0.509	-0.675	D6	3a	14031212
Exp. 3	B	DOR	11	random	14	a2	3b_78	0	1.589	1.027	-2.7	0.328	1.135	0.127	D1	3b	1403101
Exp. 3	B	DOR	11	random	14	b2	3b_79	1	-0.024	-0.016	101.6	0.081	0.28	-1.273	D2	3b	1403101
Exp. 3	B	DOR	11	random	14	c2	3b_80	0	0.964	0.623	37.7	0.215	0.744	-0.296	D3	3b	1403101
Exp. 3	B	DOR	11	random	14	d2	3b_81	0	0.97	0.627	37.3	0.206	0.713	-0.338	D4	3b	1403101
Exp. 3	B	DOR	11	random	14	e2	3b_82	1	0.012	0.008	99.2	0.077	0.266	-1.324	D5	3b	1403101
Exp. 3	B	DOR	11	random	14	f2	3b_83	0	0.187	0.121	87.9	0.129	0.446	-0.807	D6	3b	1403101
Exp. 3	C	CEF	11	random	15	a2	3a_84	1	-0.029	-0.019	101.9	0.087	0.301	-1.201	H1	3a	14031212
Exp. 3	C	CEF	11	random	15	b2	3a_85	1	-0.021	-0.014	101.4	0.082	0.284	-1.259	H2	3a	14031212
Exp. 3	C	CEF	11	random	15	c2	3a_86	0	0.856	0.558	44.2	0.217	0.751	-0.286	H3	3a	14031212
Exp. 3	C	CEF	11	random	15	d2	3a_87	1	0.009	0.006	99.4	0.079	0.273	-1.298	H4	3a	14031212
Exp. 3	C	CEF	11	random	15	e2	3a_88	0	1.349	0.879	12.1	0.28	0.969	-0.031	H5	3a	14031212
Exp. 3	C	CEF	11	random	15	f2	3a_89	0	1.298	0.846	15.4	0.317	1.097	0.093	H6	3a	14031212
Exp. 3	C	CEF	11	random	15	a2	3b_84	1	-0.036	-0.023	102.3	0.082	0.284	-1.259	H1	3b	1403101
Exp. 3	C	CEF	11	random	15	b2	3b_85	1	-0.04	-0.026	102.6	0.081	0.28	-1.273	H2	3b	1403101
Exp. 3	C	CEF	11	random	15	c2	3b_86	1	0.003	0.002	99.8	0.082	0.284	-1.259	H3	3b	1403101
Exp. 3	C	CEF	11	random	15	d2	3b_87	1	0.026	0.017	98.3	0.085	0.294	-1.224	H4	3b	1403101
Exp. 3	C	CEF	11	random	15	e2	3b_88	0	1.283	0.829	17.1	0.276	0.955	-0.046	H5	3b	1403101
Exp. 3	C	CEF	11	random	15	f2	3b_89	0	1.332	0.861	13.9	0.312	1.08	0.077	H6	3b	1403101
Exp. 3	A	CAR	11	random	16	a2	3a_90	0	0.984	0.641	35.9	0.284	0.983	-0.017	H7	3a	14031212
Exp. 3	A	CAR	11	random	16	b2	3a_91	0	0.62	0.404	59.6	0.198	0.685	-0.378	H8	3a	14031212
Exp. 3	A	CAR	11	random	16	c2	3a_92	0	1.069	0.696	30.4	0.247	0.855	-0.157	H9	3a	14031212
Exp. 3	A	CAR	11	random	16	d2	3a_93	1	-0.042	-0.027	102.7	0.083	0.287	-1.248	H10	3a	14031212
Exp. 3	A	CAR	11	random	16	e2	3a_94	0	0.483	0.315	68.5	0.145	0.502	-0.689	H11	3a	14031212
Exp. 3	A	CAR	11	random	16	f2	3a_95	0	-0.004	-0.003	100.3	0.091	0.315	-1.155	H12	3a	14031212
Exp. 3	A	CAR	11	random	16	a2	3b_90	0	1.05	0.679	32.1	0.278	0.962	-0.039	H7	3b	1403101
Exp. 3	A	CAR	11	random	16	b2	3b_91	0	0.629	0.407	59.3	0.182	0.63	-0.462	H8	3b	1403101
Exp. 3	A	CAR	11	random	16	c2	3b_92	0	0.898	0.58	42	0.207	0.716	-0.334	H9	3b	1403101
Exp. 3	A	CAR	11	random	16	d2	3b_93	1	0.026	0.017	98.3	0.085	0.294	-1.224	H10	3b	1403101
Exp. 3	A	CAR	11	random	16	e2	3b_94	0	0.659	0.426	57.4	0.188	0.651	-0.429	H11	3b	1403101
Exp. 3	A	CAR	11	random	16	f2	3b_95	1	0.025	0.016	98.4	0.086	0.298	-1.211	H12	3b	1403101
Exp. 3	A	CAR	12	mono	1	a2	3a_1	0	1.046	0.694	30.6	0.225	0.787	-0.24	G7	3a	14031212
Exp. 3	A	CAR	12	mono	1	b2	3a_2	0	0.387	0.257	74.3	0.171	0.598	-0.514	G8	3a	14031212
Exp. 3	A	CAR	12	mono	1	c2	3a_3	0	1.305	0.865	13.5	0.264	0.923	-0.08	G9	3a	14031212
Exp. 3	A	CAR	12	mono	1	d2	3a_4	0	1.243	0.824	17.6	0.252	0.881	-0.127	G10	3a	14031212
Exp. 3	A	CAR	12	mono	1	e2	3a_5	1	-0.083	-0.055	105.5	0.071	0.248	-1.394	G11	3a	14031212
Exp. 3	A	CAR	12	mono	1	f2	3a_6	0	0.689	0.457	54.3	0.197	0.689	-0.373	G12	3a	14031212
Exp. 3	A	CAR	12	mono	1	a2	3b_1	0	1.057	0.68	32	0.229	0.776	-0.254	G7	3b	1403101
Exp. 3	A	CAR	12	mono	1	b2	3b_2	0	0.637	0.41	59	0.163	0.553	-0.592	G8	3b	1403101
Exp. 3	A	CAR	12	mono	1	c2	3b_3	0	1.496	0.963	3.7	0.279	0.946	-0.056	G9	3b	1403101
Exp. 3	A	CAR	12	mono	1	d2	3b_4	0	1.359	0.875	12.5	0.283	0.959	-0.042	G10	3b	1403101
Exp. 3	A	CAR	12	mono	1	e2	3b_5	0	0.648	0.417	58.3	0.182	0.617	-0.483	G11	3b	1403101
Exp. 3	A	CAR	12	mono	1	f2	3b_6	0	0.629	0.405	59.5	0.141	0.478	-0.738	G12	3b	1403101
Exp. 3	B	DOR	12	mono	2	d2	3a_10	0	0.483	0.32	68	0.184	0.643	-0.442	B4	3a	14031212
Exp. 3	B	DOR	12	mono	2	e2	3a_11	0	1.27	0.842	15.8	0.257	0.899	-0.106	B5	3a	14031212
Exp. 3	B	DOR	12	mono	2	f2	3a_12	0	1.429	0.948	5.2	0.294	1.028	0.028	B6	3a	14031212
Exp. 3	B	DOR	12	mono	2	a2	3a_7	0	0.7	0.464	53.6	0.215	0.752	-0.285	B1	3a	14031212
Exp. 3	B	DOR	12	mono	2	b2	3a_8	0	1.399	0.928	7.2	0.288	1.007	0.007	B2	3a	14031212
Exp. 3	B	DOR	12	mono	2	c2	3a_9	0	1.445	0.958	4.2	0.275	0.962	-0.039	B3	3a	14031212
Exp. 3	B	DOR	12	mono	2	d2	3b_10	0	0.71	0.457	54.3	0.202	0.685	-0.378	B4	3b	1403101
Exp. 3	B	DOR	12	mono	2	e2	3b_11	0	1.17	0.753	24.7	0.253	0.858	-0.153	B5	3b	1403101
Exp. 3	B	DOR	12	mono	2	f2	3b_12	0	1.303	0.838	16.2	0.267	0.905	-0.1	B6	3b	1403101
Exp. 3	B	DOR	12	mono	2	a2	3b_7	0	0.726	0.467	53.3	0.206	0.698	-0.36	B1	3b	1403101
Exp. 3	B	DOR	12	mono	2	b2	3b_8	0	1.316	0.847	15.3	0.265	0.898	-0.108	B2	3b	1403101
Exp. 3	B	DOR	12	mono	2	c2	3b_9	0	1.365	0.878	12.2	0.274	0.929	-0.074	B3	3b	1403101
Exp. 3	C	CEF	12	mono	3	a2	3a_13	0	1.298	0.861	13.9	0.256	0.895	-0.111	E7	3a	14031212
Exp. 3	C	CEF	12	mono	3	b2	3a_14	0	1.362	0.903	9.7	0.266	0.93	-0.073	E8	3a	14031212
Exp. 3	C	CEF	12	mono	3	c2	3a_15	0	1.304	0.865	13.5	0.259	0.906	-0.099	E9	3a	14031212
Exp. 3	C	CEF	12	mono	3	d2	3a_16	0	1.258	0.834	16.6	0.253	0.885	-0.122	E10	3a	14031212
Exp. 3	C	CEF	12	mono	3	e2	3a_17	0	1.013	0.672	32.8	0.273	0.955	-0.046	E11	3a	14031212
Exp. 3	C	CEF	12	mono	3	f2	3a_18	0	0.813	0.539	46.1	0.208	0.727	-0.319	E12	3a	14031212
Exp. 3	C	CEF	12	mono	3	a2	3b_13	0	1.11	0.714	28.6	0.249	0.844	-0.17	E7	3b	1403101
Exp. 3	C	CEF	12	mono	3	b2	3b_14	0	1.459	0.939	6.1	0.278	0.942	-0.06	E8	3b	1403101
Exp. 3	C	CEF	12	mono	3	c2	3b_15	0	1.361	0.876	12.4	0.271	0.919	-0.084	E9	3b	1403101
Exp. 3	C	CEF	12	mono	3	d2	3b_16	1	-0.118	-0.076	107.6	0.066	0.224	-1.496	E10	3b	1403101
Exp. 3	C	CEF	12	mono	3	e2	3b_17	0	1.498	0.964	3.6	0.282	0.956	-0.045	E11	3b	1403101
Exp. 3	C	CEF	12	mono	3	f2	3b_18	0	0.968	0.623	37.7	0.257	0.871	-0.138	E12	3b	1403101
Exp. 3	C	CEF	12	fast_regular	5	a2	3a_24	0	1.332	0.883	11.7	0.272	0.951	-0.05	D7	3a	14031212
Exp. 3	C	CEF	12	fast_regular	5	b2	3a_25	1	-0.022	-0.015	101.5	0.075	0.262	-1.339	D8	3a	14031212
Exp. 3	C	CEF	12	fast_regular	5	c2	3a_26	1	-0.022	-0.015	101.5	0.081	0.283	-1.262	D9	3a	14031212
Exp. 3	C	CEF	12	fast_regular	5	d2	3a_27	0	1.349	0.895	10.5	0.277	0.969	-0.031	D10	3a	14031212
Exp. 3	C	CEF	12	fast_regular	5	e2	3a_28	1	-0.027	-0.018	101.8	0.078	0.273	-1.298	D11	3a	14031212
Exp. 3	C	CEF	12	fast_regular	5	f2	3a_29	1	-0.002	-0.001	100.1	0.079	0.276	-1.287	D12	3a	14031212
Exp. 3	C	CEF	12	fast_regular	5	a2	3b_24	0	1.274	0.82	18	0.263	0.892	-0.114	D7	3b	1403101
Exp. 3	C	CEF	12	fast_regular	5	b2	3b_25	1	-0.017	-0.011	101.1	0.08	0.271	-1.306	D8	3b	1403101
Exp. 3	C	CEF	12	fast_regular	5	c2	3b_26	0	1.378	0.887	11.3	0.284	0.963	-0.038	D9	3b	1403101
Exp. 3	C	CEF	12	fast_regular	5	d2	3b_27	0	1.301	0.837	16.3	0.283	0.959	-0.042	D10	3b	1403101
Exp. 3	C	CEF	12	fast_regular	5	e2	3b_28	0	1.466	0.943	5.7	0.296	1.003	0.003	D11	3b	1403101
Exp. 3	C	CEF	12	fast_regular	5	f2	3b_29	1	0.031	0.02	98	0.081	0.275	-1.291	D12	3b	1403101
Exp. 3	C	CEF	12	fast_regular	6	a2	3a_30	0	1.266	0.84	16	0.275	0.962	-0.039	C1	3a	14031212
Exp. 3	C	CEF	12	fast_regular	6	b2	3a_31	0	0.186	0.123	87.7	0.158	0.552	-0.594	C2	3a	14031212
Exp. 3	C	CEF	12	fast_regular	6	c2	3a_32	1	0	0	100	0.075	0.262	-1.339	C3	3a	14031212
Exp. 3	C	CEF	12	fast_regular	6	d2	3a_33	0	0.013	0.009	99.1	0.082	0.287	-1.248	C4	3a	14031212
[truncated: 6,499 more rows]

## Sheet: Fig1_E
Extinction events, max = 12
Treatment group	Treatment	Exp. 3	Exp. 4
Mono	1	1	1
Mono	2	0	1
Mono	3	1	0
Nodrug	4	0	0
Fast	5	6	1
Fast	6	5	4
Fast	7	4	2
Slow	8	0	1
Slow	9	0	2
Slow	10	2	0
Random	11	7	2
Random	12	5	2
Random	13	4	3
Random	14	4	1
Random	15	7	3
Random	16	3	1
