# Supplementary material for: High potency of sequential therapy with only β-lactam antibiotics
Source: eLife. 2021 Jul 28;10:e68876. doi: 10.7554/eLife.68876 (PMC8456660; doi:10.7554/eLife.68876)
Supplement: Figure 2—figure supplement 1—source data 1. [file elife-68876-fig2-figsupp1-data1.xlsx]

## Sheet: FigS4_A
transfer	ID	ab	drug	treatment	mean	sd	ci95
1	1	CAR	A	mono	0.291	0.049	0.039
1	1	CAR	A	random	0.291	0.049	0.039
1	1	CAR	A	fast-regular	0.291	0.049	0.039
1	1	CAR	A	slow-regular	0.291	0.049	0.039
1	2	DOR	B	mono	0.234	0.028	0.023
1	2	DOR	B	random	0.234	0.028	0.023
1	2	DOR	B	fast-regular	0.234	0.028	0.023
1	2	DOR	B	slow-regular	0.234	0.028	0.023
1	3	CEF	C	mono	0.267	0.065	0.052
1	3	CEF	C	random	0.267	0.065	0.052
1	3	CEF	C	fast-regular	0.267	0.065	0.052
1	3	CEF	C	slow-regular	0.267	0.065	0.052
2	5	DOR	B	fast-regular	0.428	0.24	0.192
2	6	CAR	A	fast-regular	0.277	0.029	0.022
2	7	CAR	A	fast-regular	0.288	0.012	0.008
2	11	DOR	B	random	0.458	0.231	0.203
2	12	CAR	A	random	0.281	0.016	0.012
2	13	CAR	A	random	0.273	0.008	0.006
2	1	CAR	A	mono	0.322	0.096	0.056
2	2	DOR	B	mono	0.344	0.089	0.05
2	3	CEF	C	mono	0.329	0.103	0.061
2	8	CAR	A	slow-regular	0.34	0.079	0.047
2	9	DOR	B	slow-regular	0.357	0.113	0.064
2	10	CEF	C	slow-regular	0.318	0.101	0.07
2	14	CAR	A	random	0.333	0.055	0.038
2	15	DOR	B	random	0.43	0.093	0.082
2	16	CEF	C	random	0.335	0.102	0.067
3	5	CEF	C	fast-regular	0.522	0.297	0.238
3	6	CEF	C	fast-regular	0.573	0.397	0.294
3	7	DOR	B	fast-regular	0.552	0.316	0.219
3	12	CEF	C	random	0.669	0.408	0.302
3	14	DOR	B	random	0.548	0.334	0.231
3	15	CAR	A	random	0.336	0.041	0.036
3	16	DOR	B	random	0.908	0.187	0.122
3	11	DOR	B	random	0.599	0.406	0.356
3	13	CAR	A	random	0.386	0.102	0.07
3	1	CAR	A	mono	0.708	0.263	0.155
3	2	DOR	B	mono	0.611	0.249	0.141
3	3	CEF	C	mono	0.802	0.314	0.186
3	8	CAR	A	slow-regular	0.733	0.274	0.162
3	9	DOR	B	slow-regular	0.588	0.28	0.159
3	10	CEF	C	slow-regular	0.881	0.219	0.152
4	13	DOR	B	random	0.7	0.324	0.224
4	14	CEF	C	random	0.764	0.341	0.236
4	16	CAR	A	random	0.671	0.239	0.156
4	5	CAR	A	fast-regular	0.711	0.353	0.283
4	6	DOR	B	fast-regular	0.465	0.22	0.163
4	7	CEF	C	fast-regular	0.81	0.328	0.227
4	12	DOR	B	random	0.523	0.24	0.178
4	15	CAR	A	random	0.351	0.115	0.101
4	11	DOR	B	random	0.619	0.449	0.394
4	1	CAR	A	mono	0.795	0.157	0.093
4	2	DOR	B	mono	0.75	0.226	0.128
4	3	CEF	C	mono	0.857	0.192	0.113
4	8	CAR	A	slow-regular	0.813	0.154	0.091
4	9	DOR	B	slow-regular	0.846	0.204	0.116
4	10	CEF	C	slow-regular	0.958	0.103	0.071
5	8	DOR	B	slow-regular	0.603	0.223	0.126
5	9	CAR	A	slow-regular	0.726	0.18	0.102
5	10	CAR	A	slow-regular	0.756	0.135	0.094
5	5	DOR	B	fast-regular	0.696	0.342	0.274
5	6	CAR	A	fast-regular	0.627	0.385	0.308
5	7	CAR	A	fast-regular	0.677	0.265	0.183
5	11	CAR	A	random	0.733	0.309	0.271
5	12	CEF	C	random	0.676	0.338	0.25
5	13	DOR	B	random	0.965	0.132	0.091
5	14	CEF	C	random	0.819	0.27	0.187
5	15	DOR	B	random	0.865	0.184	0.161
5	16	CEF	C	random	0.815	0.226	0.147
5	1	CAR	A	mono	0.75	0.164	0.097
5	2	DOR	B	mono	0.836	0.15	0.085
5	3	CEF	C	mono	0.872	0.074	0.044
6	11	CEF	C	random	0.83	0.335	0.294
6	15	CEF	C	random	1.026	0.112	0.098
6	5	CEF	C	fast-regular	0.88	0.18	0.144
6	6	CEF	C	fast-regular	0.691	0.362	0.289
6	7	DOR	B	fast-regular	0.667	0.284	0.197
6	8	DOR	B	slow-regular	0.687	0.268	0.152
6	9	CAR	A	slow-regular	0.335	0.03	0.017
6	10	CAR	A	slow-regular	0.563	0.281	0.195
6	16	CAR	A	random	0.816	0.273	0.179
6	12	DOR	B	random	0.671	0.177	0.131
6	13	CAR	A	random	0.77	0.162	0.112
6	14	CAR	A	random	0.934	0.111	0.077
6	1	CAR	A	mono	0.832	0.147	0.087
6	2	DOR	B	mono	0.915	0.099	0.056
6	3	CEF	C	mono	0.894	0.065	0.039
7	14	DOR	B	random	0.766	0.17	0.118
7	15	CEF	C	random	0.954	0.119	0.104
7	5	CAR	A	fast-regular	0.914	0.105	0.084
7	6	DOR	B	fast-regular	0.509	0.211	0.157
7	7	CEF	C	fast-regular	0.773	0.286	0.198
7	8	DOR	B	slow-regular	0.877	0.208	0.118
7	9	CAR	A	slow-regular	0.609	0.238	0.141
7	10	CAR	A	slow-regular	0.724	0.115	0.08
7	11	CAR	A	random	0.756	0.307	0.269
7	13	DOR	B	random	0.81	0.137	0.095
7	16	CAR	A	random	0.583	0.27	0.176
7	12	DOR	B	random	0.633	0.186	0.137
7	1	CAR	A	mono	0.772	0.124	0.073
7	2	DOR	B	mono	0.846	0.121	0.068
7	3	CEF	C	mono	0.842	0.089	0.053
8	12	CAR	A	random	0.75	0.31	0.23
8	16	DOR	B	random	0.864	0.212	0.138
8	5	DOR	B	fast-regular	0.849	0.132	0.105
8	6	CAR	A	fast-regular	0.612	0.321	0.238
8	7	CAR	A	fast-regular	0.678	0.246	0.17
8	8	DOR	B	slow-regular	0.92	0.214	0.121
8	9	CAR	A	slow-regular	0.847	0.196	0.116
8	10	CAR	A	slow-regular	0.761	0.152	0.105
8	11	DOR	B	random	0.771	0.295	0.258
8	13	DOR	B	random	0.979	0.043	0.03
8	14	CAR	A	random	0.875	0.107	0.074
8	15	DOR	B	random	1.035	0.099	0.087
8	1	CAR	A	mono	0.746	0.171	0.101
8	2	DOR	B	mono	0.901	0.089	0.05
8	3	CEF	C	mono	0.908	0.049	0.029
9	8	CEF	C	slow-regular	0.976	0.073	0.043
9	9	CEF	C	slow-regular	0.884	0.172	0.107
9	10	DOR	B	slow-regular	0.639	0.174	0.108
9	5	CEF	C	fast-regular	0.97	0.072	0.058
9	6	CEF	C	fast-regular	0.631	0.333	0.246
9	7	DOR	B	fast-regular	0.69	0.278	0.193
9	12	CEF	C	random	0.691	0.291	0.215
9	13	CAR	A	random	0.822	0.131	0.091
9	16	CEF	C	random	1.015	0.091	0.06
9	11	DOR	B	random	0.815	0.34	0.298
9	14	CAR	A	random	0.894	0.205	0.142
9	15	DOR	B	random	1.051	0.092	0.08
9	1	CAR	A	mono	0.763	0.176	0.104
9	2	DOR	B	mono	0.875	0.163	0.092
9	3	CEF	C	mono	0.895	0.042	0.025
10	8	CEF	C	slow-regular	0.948	0.066	0.039
10	9	CEF	C	slow-regular	0.913	0.104	0.065
10	10	DOR	B	slow-regular	0.903	0.25	0.155
10	5	CAR	A	fast-regular	0.925	0.133	0.107
10	6	DOR	B	fast-regular	0.567	0.203	0.151
10	7	CEF	C	fast-regular	0.863	0.253	0.175
10	16	CAR	A	random	0.78	0.149	0.097
10	12	DOR	B	random	0.615	0.203	0.15
10	13	DOR	B	random	0.909	0.121	0.084
10	11	DOR	B	random	0.823	0.356	0.312
10	14	CAR	A	random	0.944	0.234	0.162
10	15	DOR	B	random	1.013	0.111	0.097
10	1	CAR	A	mono	0.937	0.381	0.225
10	2	DOR	B	mono	0.852	0.112	0.063
10	3	CEF	C	mono	0.901	0.041	0.025
11	13	CEF	C	random	0.926	0.063	0.043
11	8	CEF	C	slow-regular	0.948	0.055	0.033
11	9	CEF	C	slow-regular	0.982	0.103	0.064
11	10	DOR	B	slow-regular	0.977	0.154	0.095
11	12	CAR	A	random	0.68	0.254	0.188
11	14	DOR	B	random	0.749	0.227	0.157
11	15	CEF	C	random	0.97	0.138	0.121
11	5	DOR	B	fast-regular	0.828	0.124	0.099
11	6	CAR	A	fast-regular	0.654	0.312	0.231
11	7	CAR	A	fast-regular	0.774	0.22	0.152
11	16	CAR	A	random	0.7	0.214	0.14
11	11	DOR	B	random	0.767	0.291	0.255
11	1	CAR	A	mono	0.817	0.181	0.107
11	2	DOR	B	mono	0.855	0.123	0.069
11	3	CEF	C	mono	0.891	0.061	0.036
12	11	CEF	C	random	0.802	0.318	0.279
12	13	CEF	C	random	0.919	0.066	0.046
12	14	CEF	C	random	0.945	0.041	0.029
12	5	CEF	C	fast-regular	0.956	0.036	0.029
12	6	CEF	C	fast-regular	0.653	0.284	0.21
12	7	DOR	B	fast-regular	0.804	0.231	0.16
12	8	CEF	C	slow-regular	0.935	0.058	0.034
12	9	CEF	C	slow-regular	0.943	0.099	0.062
12	10	DOR	B	slow-regular	0.93	0.145	0.09
12	12	DOR	B	random	0.603	0.244	0.181
12	16	CAR	A	random	0.692	0.136	0.089
12	15	DOR	B	random	1.007	0.125	0.11
12	1	CAR	A	mono	0.746	0.17	0.1
12	2	DOR	B	mono	0.855	0.13	0.073
12	3	CEF	C	mono	0.894	0.066	0.039
13	15	CAR	A	random	0.873	0.143	0.125
13	12	CEF	C	random	0.83	0.25	0.185
13	13	CEF	C	random	0.941	0.086	0.06
13	14	DOR	B	random	0.852	0.125	0.087
13	5	CAR	A	fast-regular	0.957	0.134	0.107
13	6	DOR	B	fast-regular	0.652	0.161	0.119
13	7	CEF	C	fast-regular	0.886	0.249	0.173
13	8	CAR	A	slow-regular	0.923	0.084	0.05
13	9	DOR	B	slow-regular	0.953	0.23	0.13
13	10	CEF	C	slow-regular	0.985	0.06	0.041
13	16	CEF	C	random	0.946	0.143	0.093
13	11	DOR	B	random	0.828	0.331	0.291
13	1	CAR	A	mono	0.802	0.216	0.128
13	2	DOR	B	mono	0.894	0.09	0.051
13	3	CEF	C	mono	0.914	0.061	0.036
14	11	CEF	C	random	0.829	0.319	0.28
14	16	DOR	B	random	0.918	0.2	0.13
14	12	CAR	A	random	0.761	0.262	0.194
14	15	CEF	C	random	0.947	0.065	0.057
14	5	DOR	B	fast-regular	0.864	0.105	0.084
14	6	CAR	A	fast-regular	0.763	0.24	0.178
14	7	CAR	A	fast-regular	0.812	0.229	0.158
14	13	CAR	A	random	0.807	0.062	0.043
14	8	CAR	A	slow-regular	0.838	0.123	0.073
14	9	DOR	B	slow-regular	0.912	0.223	0.126
14	10	CEF	C	slow-regular	0.972	0.079	0.055
14	14	CAR	A	random	0.894	0.097	0.067
14	1	CAR	A	mono	0.765	0.115	0.068
14	2	DOR	B	mono	0.882	0.102	0.058
14	3	CEF	C	mono	0.898	0.058	0.034
15	11	CAR	A	random	0.781	0.325	0.284
15	5	CEF	C	fast-regular	0.948	0.055	0.044
15	6	CEF	C	fast-regular	0.76	0.177	0.131
15	7	DOR	B	fast-regular	0.801	0.231	0.16
15	12	CAR	A	random	0.708	0.238	0.176
15	13	CEF	C	random	0.873	0.068	0.047
15	14	DOR	B	random	0.767	0.144	0.1
15	16	CEF	C	random	0.986	0.103	0.068
15	8	CAR	A	slow-regular	0.787	0.162	0.096
15	9	DOR	B	slow-regular	0.921	0.136	0.077
15	10	CEF	C	slow-regular	0.939	0.033	0.023
15	15	DOR	B	random	1.029	0.096	0.084
15	1	CAR	A	mono	0.795	0.108	0.064
15	2	DOR	B	mono	0.895	0.082	0.047
15	3	CEF	C	mono	0.888	0.067	0.04
16	16	DOR	B	random	0.905	0.213	0.139
16	15	CEF	C	random	0.95	0.06	0.053
16	5	CAR	A	fast-regular	0.908	0.106	0.085
16	6	DOR	B	fast-regular	0.656	0.169	0.126
16	7	CEF	C	fast-regular	0.896	0.264	0.183
16	13	DOR	B	random	0.94	0.092	0.064
16	12	DOR	B	random	0.663	0.19	0.141
16	8	CAR	A	slow-regular	0.755	0.211	0.125
16	9	DOR	B	slow-regular	0.913	0.164	0.093
16	10	CEF	C	slow-regular	0.929	0.035	0.024
16	14	CAR	A	random	0.909	0.084	0.058
16	11	DOR	B	random	0.787	0.327	0.287
16	1	CAR	A	mono	0.781	0.115	0.068
16	2	DOR	B	mono	0.899	0.089	0.05
16	3	CEF	C	mono	0.921	0.042	0.025
17	15	CAR	A	random	0.901	0.04	0.035
17	8	DOR	B	slow-regular	0.851	0.213	0.121
17	9	CAR	A	slow-regular	0.952	0.114	0.067
17	10	CAR	A	slow-regular	0.893	0.052	0.036
17	16	DOR	B	random	0.945	0.228	0.149
17	5	DOR	B	fast-regular	0.79	0.171	0.137
17	6	CAR	A	fast-regular	0.861	0.225	0.166
17	7	CAR	A	fast-regular	0.804	0.234	0.162
17	12	CAR	A	random	0.77	0.27	0.2
17	13	CAR	A	random	0.874	0.084	0.058
17	14	CAR	A	random	0.879	0.157	0.109
17	11	DOR	B	random	0.747	0.305	0.268
17	1	CAR	A	mono	0.801	0.097	0.058
17	2	DOR	B	mono	0.846	0.133	0.075
17	3	CEF	C	mono	0.914	0.074	0.044
18	11	CAR	A	random	0.769	0.308	0.27
18	5	CEF	C	fast-regular	0.994	0.079	0.063
18	6	CEF	C	fast-regular	0.811	0.174	0.129
18	7	DOR	B	fast-regular	0.824	0.248	0.172
18	8	DOR	B	slow-regular	0.931	0.191	0.108
18	9	CAR	A	slow-regular	0.888	0.073	0.043
18	10	CAR	A	slow-regular	0.801	0.174	0.12
18	13	CEF	C	random	0.898	0.07	0.048
18	15	CEF	C	random	0.959	0.065	0.057
18	16	DOR	B	random	0.999	0.141	0.092
18	12	DOR	B	random	0.689	0.24	0.178
18	14	CAR	A	random	0.861	0.14	0.097
18	1	CAR	A	mono	0.836	0.092	0.054
18	2	DOR	B	mono	0.885	0.075	0.042
18	3	CEF	C	mono	0.888	0.077	0.046
19	11	CEF	C	random	0.823	0.293	0.257
19	12	CEF	C	random	0.844	0.259	0.192
19	5	CAR	A	fast-regular	0.978	0.126	0.1
19	6	DOR	B	fast-regular	0.691	0.067	0.05
19	7	CEF	C	fast-regular	0.876	0.229	0.159
19	8	DOR	B	slow-regular	0.974	0.188	0.106
19	9	CAR	A	slow-regular	0.899	0.084	0.05
19	10	CAR	A	slow-regular	0.778	0.166	0.115
19	13	DOR	B	random	0.955	0.087	0.06
19	15	CEF	C	random	0.989	0.082	0.072
19	16	CEF	C	random	1.08	0.031	0.02
19	14	CAR	A	random	0.903	0.12	0.083
19	1	CAR	A	mono	0.832	0.094	0.056
19	2	DOR	B	mono	0.937	0.115	0.065
19	3	CEF	C	mono	0.917	0.06	0.035
20	15	CAR	A	random	0.893	0.071	0.062
20	12	CEF	C	random	0.848	0.249	0.185
20	14	DOR	B	random	0.804	0.169	0.117
20	5	DOR	B	fast-regular	0.858	0.214	0.171
20	6	CAR	A	fast-regular	0.883	0.123	0.091
20	7	CAR	A	fast-regular	0.812	0.244	0.169
20	13	CEF	C	random	0.957	0.104	0.072
20	16	CAR	A	random	0.903	0.096	0.063
20	8	DOR	B	slow-regular	0.935	0.16	0.09
20	9	CAR	A	slow-regular	0.864	0.089	0.053
20	10	CAR	A	slow-regular	0.809	0.06	0.041
20	11	DOR	B	random	0.799	0.322	0.282
20	1	CAR	A	mono	0.803	0.102	0.06
20	2	DOR	B	mono	0.896	0.055	0.031
20	3	CEF	C	mono	0.883	0.068	0.04
21	14	CEF	C	random	0.92	0.037	0.026
21	8	CEF	C	slow-regular	0.954	0.071	0.042
21	9	CEF	C	slow-regular	0.894	0.086	0.053
21	10	DOR	B	slow-regular	0.845	0.077	0.048
21	5	CEF	C	fast-regular	0.972	0.087	0.07
21	6	CEF	C	fast-regular	0.855	0.12	0.089
21	7	DOR	B	fast-regular	0.838	0.249	0.172
21	13	CAR	A	random	0.835	0.04	0.028
21	16	DOR	B	random	0.907	0.145	0.094
21	15	CEF	C	random	0.964	0.05	0.044
21	12	DOR	B	random	0.749	0.23	0.17
21	11	DOR	B	random	0.776	0.284	0.249
21	1	CAR	A	mono	0.817	0.084	0.05
21	2	DOR	B	mono	0.908	0.045	0.025
21	3	CEF	C	mono	0.885	0.068	0.04
22	11	CEF	C	random	0.795	0.298	0.262
22	14	CEF	C	random	0.924	0.094	0.065
22	8	CEF	C	slow-regular	0.937	0.081	0.048
22	9	CEF	C	slow-regular	0.906	0.097	0.06
22	10	DOR	B	slow-regular	0.952	0.154	0.096
22	12	CAR	A	random	0.777	0.257	0.19
22	5	CAR	A	fast-regular	0.925	0.125	0.1
22	6	DOR	B	fast-regular	0.754	0.071	0.053
22	7	CEF	C	fast-regular	0.848	0.247	0.171
22	13	CEF	C	random	0.877	0.084	0.058
22	16	DOR	B	random	0.977	0.152	0.099
22	15	CEF	C	random	0.944	0.046	0.041
22	1	CAR	A	mono	0.813	0.073	0.043
22	2	DOR	B	mono	0.914	0.072	0.041
22	3	CEF	C	mono	0.866	0.078	0.046
23	11	CEF	C	random	0.811	0.331	0.29
23	8	CEF	C	slow-regular	0.959	0.064	0.038
23	9	CEF	C	slow-regular	0.949	0.094	0.058
23	10	DOR	B	slow-regular	0.977	0.138	0.086
23	14	DOR	B	random	0.88	0.089	0.061
23	5	DOR	B	fast-regular	0.888	0.094	0.075
23	6	CAR	A	fast-regular	0.9	0.05	0.037
23	7	CAR	A	fast-regular	0.778	0.222	0.154
23	16	CAR	A	random	0.893	0.094	0.062
23	13	CEF	C	random	0.906	0.071	0.049
23	15	DOR	B	random	0.99	0.071	0.062
23	12	DOR	B	random	0.779	0.248	0.184
23	1	CAR	A	mono	0.856	0.066	0.039
23	2	DOR	B	mono	0.945	0.088	0.05
23	3	CEF	C	mono	0.885	0.092	0.055
24	14	CEF	C	random	0.94	0.072	0.05
24	11	CEF	C	random	0.789	0.287	0.251
24	5	CEF	C	fast-regular	0.961	0.081	0.065
24	6	CEF	C	fast-regular	0.855	0.135	0.1
24	7	DOR	B	fast-regular	0.817	0.241	0.167
24	8	CEF	C	slow-regular	0.951	0.103	0.061
24	9	CEF	C	slow-regular	0.958	0.124	0.077
24	10	DOR	B	slow-regular	0.963	0.143	0.088
24	12	CAR	A	random	0.79	0.264	0.196
24	16	CEF	C	random	0.958	0.063	0.041
24	13	CEF	C	random	0.904	0.073	0.051
24	15	CEF	C	random	1.009	0.032	0.028
24	1	CAR	A	mono	0.86	0.086	0.051
24	2	DOR	B	mono	0.931	0.085	0.048
24	3	CEF	C	mono	0.906	0.062	0.037
25	11	CEF	C	random	0.879	0.144	0.127
25	13	DOR	B	random	0.873	0.098	0.068
25	14	DOR	B	random	0.837	0.127	0.088
25	5	CAR	A	fast-regular	0.892	0.122	0.098
25	6	DOR	B	fast-regular	0.729	0.113	0.084
25	7	CEF	C	fast-regular	0.92	0.081	0.056
25	8	CAR	A	slow-regular	0.904	0.089	0.053
25	9	DOR	B	slow-regular	0.862	0.138	0.078
25	10	CEF	C	slow-regular	0.953	0.053	0.037
25	12	CAR	A	random	0.825	0.164	0.121
25	16	CAR	A	random	0.905	0.117	0.077
25	15	CEF	C	random	0.954	0.072	0.063
25	1	CAR	A	mono	0.88	0.057	0.033
25	2	DOR	B	mono	0.819	0.081	0.046
25	3	CEF	C	mono	0.897	0.067	0.04
26	15	CAR	A	random	0.929	0.035	0.031
26	14	CEF	C	random	0.978	0.054	0.037
26	5	DOR	B	fast-regular	0.818	0.164	0.131
26	6	CAR	A	fast-regular	0.943	0.047	0.035
26	7	CAR	A	fast-regular	0.858	0.071	0.049
26	11	CEF	C	random	0.909	0.124	0.109
26	13	DOR	B	random	0.953	0.044	0.03
26	8	CAR	A	slow-regular	0.857	0.136	0.081
26	9	DOR	B	slow-regular	0.939	0.138	0.078
26	10	CEF	C	slow-regular	0.995	0.076	0.053
26	16	CAR	A	random	0.857	0.081	0.053
26	12	DOR	B	random	0.783	0.148	0.11
26	1	CAR	A	mono	0.901	0.068	0.04
26	2	DOR	B	mono	0.915	0.08	0.045
26	3	CEF	C	mono	0.916	0.047	0.028
27	11	CAR	A	random	0.901	0.12	0.105
27	14	CEF	C	random	0.907	0.042	0.029
27	5	CEF	C	fast-regular	0.933	0.056	0.045
27	6	CEF	C	fast-regular	0.882	0.058	0.043
27	7	DOR	B	fast-regular	0.887	0.113	0.078
27	12	CAR	A	random	0.837	0.132	0.098
27	13	DOR	B	random	0.905	0.038	0.027
27	15	DOR	B	random	0.959	0.053	0.046
27	8	CAR	A	slow-regular	0.822	0.115	0.068
27	9	DOR	B	slow-regular	0.885	0.102	0.058
27	10	CEF	C	slow-regular	0.921	0.055	0.038
27	16	CAR	A	random	0.872	0.071	0.046
27	1	CAR	A	mono	0.858	0.07	0.042
27	2	DOR	B	mono	0.897	0.056	0.032
27	3	CEF	C	mono	0.855	0.066	0.039
28	13	CAR	A	random	0.85	0.069	0.048
28	16	CEF	C	random	0.939	0.055	0.036
28	5	CAR	A	fast-regular	0.892	0.107	0.086
28	6	DOR	B	fast-regular	0.732	0.074	0.055
28	7	CEF	C	fast-regular	0.912	0.038	0.026
28	8	CAR	A	slow-regular	0.843	0.114	0.067
28	9	DOR	B	slow-regular	0.925	0.142	0.08
28	10	CEF	C	slow-regular	0.928	0.068	0.047
28	12	DOR	B	random	0.838	0.135	0.1
28	14	CAR	A	random	0.893	0.088	0.061
28	15	CEF	C	random	0.983	0.048	0.042
28	11	DOR	B	random	0.832	0.121	0.106
28	1	CAR	A	mono	0.865	0.067	0.04
28	2	DOR	B	mono	0.884	0.064	0.036
28	3	CEF	C	mono	0.888	0.053	0.032
29	11	CAR	A	random	0.909	0.1	0.087
29	15	CAR	A	random	0.909	0.039	0.034
29	8	DOR	B	slow-regular	0.846	0.135	0.076
29	9	CAR	A	slow-regular	0.93	0.064	0.036
29	10	CAR	A	slow-regular	0.902	0.022	0.015
29	13	CAR	A	random	0.787	0.047	0.032
29	16	DOR	B	random	0.907	0.161	0.105
29	5	DOR	B	fast-regular	0.838	0.117	0.094
29	6	CAR	A	fast-regular	0.921	0.06	0.044
29	7	CAR	A	fast-regular	0.85	0.066	0.046
29	12	CAR	A	random	0.851	0.118	0.087
29	14	CAR	A	random	0.88	0.1	0.069
29	1	CAR	A	mono	0.869	0.064	0.038
29	2	DOR	B	mono	0.909	0.098	0.055
29	3	CEF	C	mono	0.915	0.044	0.026
30	12	CEF	C	random	0.871	0.088	0.065
30	14	DOR	B	random	0.832	0.118	0.082
30	5	CEF	C	fast-regular	0.946	0.085	0.068
30	6	CEF	C	fast-regular	0.887	0.08	0.06
30	7	DOR	B	fast-regular	0.871	0.082	0.057
30	8	DOR	B	slow-regular	0.871	0.075	0.043
30	9	CAR	A	slow-regular	0.883	0.049	0.028
30	10	CAR	A	slow-regular	0.799	0.086	0.059
30	11	CEF	C	random	0.927	0.093	0.082
30	16	DOR	B	random	0.899	0.14	0.091
30	13	CEF	C	random	0.84	0.076	0.053
30	15	DOR	B	random	0.926	0.076	0.066
30	1	CAR	A	mono	0.85	0.07	0.041
30	2	DOR	B	mono	0.891	0.065	0.037
30	3	CEF	C	mono	0.879	0.05	0.03
31	14	CEF	C	random	0.968	0.048	0.034
31	5	CAR	A	fast-regular	0.928	0.144	0.115
31	6	DOR	B	fast-regular	0.808	0.073	0.054
31	7	CEF	C	fast-regular	0.962	0.067	0.046
31	8	DOR	B	slow-regular	0.91	0.098	0.058
31	9	CAR	A	slow-regular	0.896	0.086	0.049
31	10	CAR	A	slow-regular	0.812	0.09	0.062
31	12	CAR	A	random	0.907	0.079	0.059
31	13	CEF	C	random	0.941	0.071	0.05
31	16	CAR	A	random	0.926	0.127	0.083
31	15	CEF	C	random	0.998	0.042	0.037
31	11	DOR	B	random	0.895	0.107	0.094
31	1	CAR	A	mono	0.919	0.09	0.053
31	2	DOR	B	mono	0.932	0.082	0.046
31	3	CEF	C	mono	0.941	0.072	0.042
32	11	CAR	A	random	0.913	0.072	0.063
32	15	CAR	A	random	0.967	0.067	0.059
32	16	CEF	C	random	1.005	0.085	0.055
32	5	DOR	B	fast-regular	0.829	0.166	0.133
32	6	CAR	A	fast-regular	0.918	0.042	0.031
32	7	CAR	A	fast-regular	1.006	0.341	0.236
32	8	DOR	B	slow-regular	0.885	0.075	0.044
32	9	CAR	A	slow-regular	0.901	0.056	0.031
32	10	CAR	A	slow-regular	0.853	0.085	0.059
32	12	CAR	A	random	0.96	0.296	0.22
32	13	CEF	C	random	0.913	0.054	0.038
32	14	CAR	A	random	0.904	0.086	0.059
32	1	CAR	A	mono	0.913	0.089	0.052
32	2	DOR	B	mono	0.887	0.082	0.047
32	3	CEF	C	mono	0.935	0.06	0.035
33	12	CEF	C	random	0.928	0.112	0.083
33	8	CEF	C	slow-regular	0.96	0.035	0.021
33	9	CEF	C	slow-regular	0.945	0.086	0.049
33	10	DOR	B	slow-regular	0.802	0.067	0.046
33	15	CAR	A	random	0.936	0.148	0.13
33	14	DOR	B	random	0.819	0.128	0.089
33	5	CEF	C	fast-regular	1.008	0.073	0.058
33	6	CEF	C	fast-regular	0.925	0.064	0.047
33	7	DOR	B	fast-regular	0.918	0.157	0.109
33	11	CEF	C	random	0.946	0.056	0.049
33	13	DOR	B	random	0.912	0.125	0.086
33	16	CEF	C	random	0.975	0.065	0.043
33	1	CAR	A	mono	0.918	0.089	0.053
33	2	DOR	B	mono	0.902	0.062	0.035
33	3	CEF	C	mono	0.95	0.077	0.045
34	8	CEF	C	slow-regular	0.982	0.091	0.054
34	9	CEF	C	slow-regular	0.947	0.07	0.04
34	10	DOR	B	slow-regular	0.892	0.122	0.084
34	15	CAR	A	random	0.867	0.093	0.081
34	5	CAR	A	fast-regular	0.881	0.119	0.095
34	6	DOR	B	fast-regular	0.767	0.12	0.089
34	7	CEF	C	fast-regular	0.939	0.046	0.032
34	11	CEF	C	random	0.909	0.065	0.057
34	12	DOR	B	random	0.902	0.144	0.107
34	16	CAR	A	random	0.916	0.089	0.058
34	13	CEF	C	random	0.965	0.075	0.052
34	14	CAR	A	random	0.895	0.053	0.037
34	1	CAR	A	mono	0.872	0.089	0.053
34	2	DOR	B	mono	0.887	0.08	0.045
34	3	CEF	C	mono	0.906	0.076	0.045
35	11	CAR	A	random	0.908	0.118	0.103
35	13	CAR	A	random	0.905	0.062	0.043
35	8	CEF	C	slow-regular	0.958	0.061	0.036
35	9	CEF	C	slow-regular	1.012	0.102	0.058
35	10	DOR	B	slow-regular	0.944	0.069	0.048
35	14	DOR	B	random	0.803	0.16	0.111
35	15	CAR	A	random	0.922	0.241	0.212
35	5	DOR	B	fast-regular	0.882	0.179	0.143
35	6	CAR	A	fast-regular	0.97	0.089	0.066
35	7	CAR	A	fast-regular	0.871	0.085	0.059
35	16	CEF	C	random	1	0.07	0.046
35	12	DOR	B	random	0.989	0.102	0.076
35	1	CAR	A	mono	0.909	0.086	0.051
35	2	DOR	B	mono	0.932	0.085	0.048
35	3	CEF	C	mono	0.943	0.073	0.043
36	12	CEF	C	random	0.971	0.035	0.026
36	13	CAR	A	random	0.773	0.117	0.081
36	16	DOR	B	random	0.92	0.165	0.108
36	5	CEF	C	fast-regular	0.981	0.045	0.036
36	6	CEF	C	fast-regular	0.958	0.08	0.059
36	7	DOR	B	fast-regular	0.918	0.143	0.099
36	8	CEF	C	slow-regular	0.982	0.07	0.041
36	9	CEF	C	slow-regular	1.06	0.084	0.048
36	10	DOR	B	slow-regular	1.012	0.114	0.079
36	15	CEF	C	random	0.965	0.056	0.049
36	11	DOR	B	random	0.883	0.202	0.177
36	14	CAR	A	random	0.926	0.082	0.057
36	1	CAR	A	mono	0.891	0.062	0.037
36	2	DOR	B	mono	0.91	0.055	0.031
36	3	CEF	C	mono	0.969	0.074	0.044
37	12	CEF	C	random	0.944	0.06	0.045
37	14	DOR	B	random	0.778	0.157	0.109
37	5	CAR	A	fast-regular	0.911	0.129	0.103
37	6	DOR	B	fast-regular	0.78	0.124	0.092
37	7	CEF	C	fast-regular	0.936	0.034	0.023
37	8	CAR	A	slow-regular	0.897	0.081	0.048
37	9	DOR	B	slow-regular	0.912	0.149	0.084
37	10	CEF	C	slow-regular	0.932	0.038	0.026
37	11	CEF	C	random	0.947	0.038	0.034
37	16	CEF	C	random	0.997	0.089	0.058
37	13	CEF	C	random	0.887	0.097	0.067
37	15	CEF	C	random	1.022	0.05	0.044
37	1	CAR	A	mono	0.93	0.177	0.105
37	2	DOR	B	mono	0.893	0.087	0.049
37	3	CEF	C	mono	0.91	0.048	0.028
38	11	CAR	A	random	0.864	0.124	0.108
38	14	CEF	C	random	0.943	0.066	0.045
38	12	CEF	C	random	0.927	0.07	0.052
38	13	CAR	A	random	0.827	0.085	0.059
38	15	CAR	A	random	0.942	0.032	0.028
38	16	DOR	B	random	0.948	0.15	0.098
38	5	DOR	B	fast-regular	0.839	0.128	0.102
38	6	CAR	A	fast-regular	0.907	0.05	0.037
38	7	CAR	A	fast-regular	0.877	0.068	0.047
38	8	CAR	A	slow-regular	0.882	0.104	0.061
38	9	DOR	B	slow-regular	0.938	0.155	0.088
38	10	CEF	C	slow-regular	0.972	0.102	0.071
38	1	CAR	A	mono	0.9	0.072	0.043
38	2	DOR	B	mono	0.883	0.075	0.042
38	3	CEF	C	mono	0.933	0.076	0.045
39	11	CAR	A	random	0.915	0.138	0.121
39	14	CEF	C	random	0.975	0.063	0.044
39	5	CEF	C	fast-regular	0.975	0.052	0.042
39	6	CEF	C	fast-regular	0.931	0.072	0.053
39	7	DOR	B	fast-regular	0.875	0.078	0.054
39	13	CAR	A	random	0.785	0.102	0.071
39	16	CAR	A	random	0.944	0.056	0.037
39	8	CAR	A	slow-regular	0.866	0.106	0.062
39	9	DOR	B	slow-regular	0.978	0.134	0.076
39	10	CEF	C	slow-regular	0.97	0.052	0.036
39	12	DOR	B	random	1.009	0.11	0.082
39	15	CEF	C	random	0.962	0.036	0.031
39	1	CAR	A	mono	0.914	0.086	0.051
39	2	DOR	B	mono	0.943	0.107	0.061
39	3	CEF	C	mono	0.947	0.07	0.041
40	11	CAR	A	random	0.896	0.093	0.081
40	12	CEF	C	random	1.03	0.066	0.049
40	14	CEF	C	random	0.959	0.055	0.038
40	15	CAR	A	random	1.001	0.129	0.113
40	5	CAR	A	fast-regular	0.914	0.082	0.066
40	6	DOR	B	fast-regular	0.813	0.139	0.103
40	7	CEF	C	fast-regular	0.942	0.067	0.046
40	13	CAR	A	random	0.852	0.127	0.088
40	16	CEF	C	random	0.987	0.055	0.036
40	8	CAR	A	slow-regular	0.876	0.098	0.058
40	9	DOR	B	slow-regular	0.933	0.096	0.054
40	10	CEF	C	slow-regular	0.953	0.037	0.026
40	1	CAR	A	mono	0.928	0.074	0.044
40	2	DOR	B	mono	0.912	0.07	0.04
40	3	CEF	C	mono	0.935	0.069	0.041
41	13	DOR	B	random	0.879	0.158	0.109
41	8	DOR	B	slow-regular	0.866	0.091	0.054
41	9	CAR	A	slow-regular	0.997	0.075	0.042
41	10	CAR	A	slow-regular	0.944	0.037	0.025
41	12	CEF	C	random	0.99	0.06	0.045
41	5	DOR	B	fast-regular	0.898	0.088	0.071
41	6	CAR	A	fast-regular	0.967	0.088	0.065
41	7	CAR	A	fast-regular	0.93	0.069	0.048
41	11	CEF	C	random	0.974	0.081	0.071
41	15	CAR	A	random	0.898	0.191	0.168
41	16	CEF	C	random	0.983	0.088	0.057
41	14	CAR	A	random	0.941	0.072	0.05
41	1	CAR	A	mono	0.944	0.068	0.04
41	2	DOR	B	mono	0.979	0.063	0.036
41	3	CEF	C	mono	0.962	0.05	0.03
42	5	CEF	C	fast-regular	0.97	0.036	0.029
42	6	CEF	C	fast-regular	0.958	0.093	0.069
42	7	DOR	B	fast-regular	0.928	0.102	0.071
42	8	DOR	B	slow-regular	0.886	0.097	0.057
42	9	CAR	A	slow-regular	0.965	0.09	0.051
42	10	CAR	A	slow-regular	0.922	0.046	0.032
42	12	CEF	C	random	1.019	0.082	0.061
42	11	CEF	C	random	0.94	0.052	0.046
42	13	CAR	A	random	0.933	0.086	0.06
42	16	CEF	C	random	1.001	0.069	0.045
42	15	CEF	C	random	0.991	0.05	0.044
42	14	CAR	A	random	0.917	0.066	0.046
42	1	CAR	A	mono	0.949	0.057	0.034
42	2	DOR	B	mono	0.947	0.049	0.027
42	3	CEF	C	mono	0.982	0.058	0.034
43	15	DOR	B	random	0.924	0.096	0.084
43	13	DOR	B	random	0.799	0.148	0.102
43	14	CEF	C	random	0.917	0.057	0.04
43	5	CAR	A	fast-regular	0.91	0.09	0.072
43	6	DOR	B	fast-regular	0.819	0.085	0.063
43	7	CEF	C	fast-regular	0.908	0.041	0.028
43	8	DOR	B	slow-regular	0.904	0.109	0.064
43	9	CAR	A	slow-regular	0.894	0.053	0.03
43	10	CAR	A	slow-regular	0.878	0.068	0.047
43	16	CAR	A	random	0.945	0.066	0.043
43	11	DOR	B	random	0.865	0.097	0.085
43	12	DOR	B	random	1.041	0.089	0.066
43	1	CAR	A	mono	0.917	0.066	0.039
43	2	DOR	B	mono	0.896	0.045	0.025
43	3	CEF	C	mono	0.936	0.069	0.041
44	16	DOR	B	random	0.853	0.088	0.057
44	12	CAR	A	random	0.934	0.049	0.037
44	14	CEF	C	random	0.944	0.062	0.043
44	5	DOR	B	fast-regular	0.803	0.152	0.122
44	6	CAR	A	fast-regular	0.928	0.047	0.035
44	7	CAR	A	fast-regular	0.914	0.109	0.075
44	15	CAR	A	random	0.955	0.027	0.024
44	8	DOR	B	slow-regular	0.912	0.083	0.049
44	9	CAR	A	slow-regular	0.917	0.077	0.043
44	10	CAR	A	slow-regular	0.904	0.072	0.05
44	13	CAR	A	random	0.891	0.081	0.056
44	11	DOR	B	random	0.852	0.123	0.108
44	1	CAR	A	mono	0.922	0.083	0.049
44	2	DOR	B	mono	0.911	0.078	0.044
44	3	CEF	C	mono	0.956	0.053	0.031
45	8	CEF	C	slow-regular	0.958	0.05	0.03
45	9	CEF	C	slow-regular	0.95	0.062	0.035
45	10	DOR	B	slow-regular	0.828	0.095	0.066
45	14	DOR	B	random	0.861	0.1	0.069
45	13	DOR	B	random	0.861	0.148	0.103
45	16	DOR	B	random	0.954	0.134	0.087
45	5	CEF	C	fast-regular	0.942	0.035	0.028
45	6	CEF	C	fast-regular	0.926	0.043	0.032
45	7	DOR	B	fast-regular	0.925	0.07	0.049
45	12	CEF	C	random	0.939	0.076	0.056
45	11	DOR	B	random	0.867	0.141	0.123
45	15	CEF	C	random	0.916	0.044	0.039
45	1	CAR	A	mono	0.918	0.079	0.047
45	2	DOR	B	mono	0.886	0.056	0.032
45	3	CEF	C	mono	0.914	0.066	0.039
46	11	CAR	A	random	0.897	0.099	0.086
46	8	CEF	C	slow-regular	0.968	0.073	0.043
46	9	CEF	C	slow-regular	0.95	0.067	0.038
46	10	DOR	B	slow-regular	0.925	0.079	0.055
46	14	DOR	B	random	0.835	0.131	0.091
46	12	CAR	A	random	0.903	0.065	0.048
46	5	CAR	A	fast-regular	0.892	0.076	0.061
46	6	DOR	B	fast-regular	0.802	0.108	0.08
46	7	CEF	C	fast-regular	0.944	0.031	0.021
46	15	CAR	A	random	0.958	0.052	0.046
46	16	CAR	A	random	0.967	0.076	0.049
46	13	CAR	A	random	0.876	0.078	0.054
46	1	CAR	A	mono	0.904	0.042	0.025
46	2	DOR	B	mono	0.938	0.104	0.059
46	3	CEF	C	mono	0.95	0.037	0.022
47	15	DOR	B	random	0.905	0.183	0.16
47	11	CAR	A	random	0.905	0.12	0.105
47	8	CEF	C	slow-regular	0.977	0.086	0.051
47	9	CEF	C	slow-regular	0.946	0.076	0.043
47	10	DOR	B	slow-regular	0.98	0.123	0.085
47	14	CEF	C	random	0.957	0.053	0.037
47	5	DOR	B	fast-regular	0.815	0.136	0.109
47	6	CAR	A	fast-regular	0.932	0.042	0.031
47	7	CAR	A	fast-regular	0.91	0.074	0.051
47	12	CEF	C	random	0.964	0.118	0.087
47	13	CEF	C	random	0.924	0.102	0.071
47	16	CAR	A	random	0.95	0.082	0.054
47	1	CAR	A	mono	0.958	0.135	0.08
47	2	DOR	B	mono	0.923	0.082	0.046
47	3	CEF	C	mono	0.963	0.066	0.039
48	11	CAR	A	random	0.91	0.094	0.082
48	14	DOR	B	random	0.913	0.135	0.094
48	16	DOR	B	random	0.98	0.13	0.085
48	5	CEF	C	fast-regular	0.967	0.031	0.025
48	6	CEF	C	fast-regular	0.93	0.054	0.04
48	7	DOR	B	fast-regular	0.976	0.064	0.045
48	8	CEF	C	slow-regular	0.986	0.07	0.041
48	9	CEF	C	slow-regular	0.992	0.081	0.046
48	10	DOR	B	slow-regular	0.99	0.076	0.053
48	12	CEF	C	random	0.977	0.052	0.039
48	13	CAR	A	random	0.911	0.094	0.065
48	15	CEF	C	random	1.024	0.075	0.066
48	1	CAR	A	mono	0.945	0.076	0.045
48	2	DOR	B	mono	0.947	0.077	0.043
48	3	CEF	C	mono	0.946	0.09	0.053
49	15	DOR	B	random	0.97	0.126	0.111
49	13	DOR	B	random	0.819	0.124	0.086
49	11	CEF	C	random	0.924	0.063	0.056
49	14	CEF	C	random	0.949	0.035	0.024
49	5	CAR	A	fast-regular	0.916	0.105	0.084
49	6	DOR	B	fast-regular	0.85	0.096	0.071
49	7	CEF	C	fast-regular	0.971	0.09	0.062
49	8	CAR	A	slow-regular	0.935	0.079	0.047
49	9	DOR	B	slow-regular	0.894	0.119	0.067
49	10	CEF	C	slow-regular	0.964	0.068	0.047
49	16	CEF	C	random	1.006	0.052	0.034
49	12	CEF	C	random	1.013	0.166	0.123
49	1	CAR	A	mono	0.91	0.07	0.041
49	2	DOR	B	mono	0.944	0.066	0.038
49	3	CEF	C	mono	0.96	0.069	0.041
50	15	DOR	B	random	1.029	0.122	0.107
50	11	CAR	A	random	0.873	0.112	0.098
50	14	DOR	B	random	0.854	0.087	0.06
50	16	DOR	B	random	0.932	0.101	0.066
50	5	DOR	B	fast-regular	0.925	0.112	0.09
50	6	CAR	A	fast-regular	0.965	0.086	0.064
50	7	CAR	A	fast-regular	0.839	0.063	0.044
50	12	DOR	B	random	0.975	0.078	0.058
50	13	CEF	C	random	1.014	0.146	0.101
50	8	CAR	A	slow-regular	0.872	0.079	0.047
50	9	DOR	B	slow-regular	0.941	0.129	0.073
50	10	CEF	C	slow-regular	0.963	0.081	0.056
50	1	CAR	A	mono	0.883	0.075	0.044
50	2	DOR	B	mono	0.91	0.065	0.037
50	3	CEF	C	mono	0.948	0.051	0.03
51	5	CEF	C	fast-regular	0.857	0.039	0.031
51	6	CEF	C	fast-regular	0.84	0.068	0.05
51	7	DOR	B	fast-regular	0.876	0.098	0.068
51	11	CEF	C	random	0.802	0.12	0.106
51	14	DOR	B	random	0.862	0.158	0.109
51	12	DOR	B	random	0.893	0.095	0.07
51	13	CEF	C	random	0.868	0.064	0.044
51	16	CEF	C	random	0.919	0.057	0.037
51	8	CAR	A	slow-regular	0.828	0.094	0.056
51	9	DOR	B	slow-regular	0.86	0.125	0.071
51	10	CEF	C	slow-regular	0.9	0.078	0.054
51	15	CEF	C	random	0.93	0.074	0.065
51	1	CAR	A	mono	0.846	0.073	0.043
51	2	DOR	B	mono	0.865	0.1	0.057
51	3	CEF	C	mono	0.857	0.054	0.032
52	12	CAR	A	random	0.924	0.049	0.036
52	15	DOR	B	random	1.016	0.12	0.105
52	11	CAR	A	random	0.87	0.112	0.098
52	14	CEF	C	random	0.938	0.04	0.028
52	16	DOR	B	random	0.984	0.146	0.096
52	5	CAR	A	fast-regular	0.9	0.089	0.071
52	6	DOR	B	fast-regular	0.869	0.074	0.055
52	7	CEF	C	fast-regular	0.968	0.062	0.043
52	13	CAR	A	random	0.877	0.089	0.062
52	8	CAR	A	slow-regular	0.875	0.065	0.038
52	9	DOR	B	slow-regular	0.987	0.127	0.072
52	10	CEF	C	slow-regular	0.985	0.094	0.065
52	1	CAR	A	mono	0.898	0.074	0.044
52	2	DOR	B	mono	0.971	0.075	0.043
52	3	CEF	C	mono	0.943	0.045	0.026
53	8	DOR	B	slow-regular	0.872	0.105	0.062
53	9	CAR	A	slow-regular	0.975	0.068	0.038
53	10	CAR	A	slow-regular	0.952	0.028	0.02
53	5	DOR	B	fast-regular	0.971	0.105	0.084
53	6	CAR	A	fast-regular	0.941	0.036	0.027
53	7	CAR	A	fast-regular	0.912	0.052	0.036
53	11	CAR	A	random	0.917	0.092	0.081
53	16	CAR	A	random	0.986	0.07	0.046
53	12	CEF	C	random	0.987	0.102	0.076
53	13	CEF	C	random	0.932	0.097	0.067
53	14	CAR	A	random	0.935	0.098	0.068
53	15	CEF	C	random	1.01	0.058	0.051
53	1	CAR	A	mono	0.92	0.065	0.038
53	2	DOR	B	mono	0.982	0.079	0.045
53	3	CEF	C	mono	0.986	0.068	0.04
54	13	DOR	B	random	0.832	0.114	0.079
54	12	CAR	A	random	0.903	0.09	0.067
54	15	DOR	B	random	0.961	0.053	0.046
54	5	CEF	C	fast-regular	0.947	0.049	0.039
54	6	CEF	C	fast-regular	0.9	0.047	0.035
54	7	DOR	B	fast-regular	0.95	0.074	0.051
54	8	DOR	B	slow-regular	0.907	0.12	0.071
54	9	CAR	A	slow-regular	0.926	0.069	0.039
54	10	CAR	A	slow-regular	0.859	0.12	0.083
54	16	DOR	B	random	0.975	0.096	0.063
54	11	CAR	A	random	0.852	0.094	0.082
54	14	CAR	A	random	0.873	0.074	0.051
54	1	CAR	A	mono	0.885	0.062	0.037
54	2	DOR	B	mono	0.94	0.075	0.043
54	3	CEF	C	mono	0.931	0.082	0.049
55	11	CEF	C	random	0.957	0.048	0.042
55	12	CAR	A	random	0.881	0.095	0.07
55	15	DOR	B	random	1.103	0.052	0.046
55	5	CAR	A	fast-regular	0.937	0.112	0.089
55	6	DOR	B	fast-regular	0.921	0.035	0.026
55	7	CEF	C	fast-regular	0.97	0.029	0.02
55	8	DOR	B	slow-regular	0.959	0.072	0.042
55	9	CAR	A	slow-regular	0.933	0.079	0.045
55	10	CAR	A	slow-regular	0.896	0.05	0.035
55	16	CEF	C	random	1.008	0.031	0.02
55	13	CAR	A	random	0.927	0.078	0.054
55	14	CAR	A	random	0.889	0.08	0.055
55	1	CAR	A	mono	0.925	0.071	0.042
55	2	DOR	B	mono	0.981	0.091	0.052
55	3	CEF	C	mono	0.952	0.083	0.049
56	14	DOR	B	random	0.855	0.13	0.09
56	5	DOR	B	fast-regular	0.962	0.042	0.033
56	6	CAR	A	fast-regular	0.987	0.056	0.041
56	7	CAR	A	fast-regular	0.924	0.065	0.045
56	11	DOR	B	random	0.888	0.147	0.129
56	12	DOR	B	random	1.011	0.115	0.085
56	15	DOR	B	random	1.079	0.071	0.062
56	16	DOR	B	random	0.984	0.07	0.046
56	8	DOR	B	slow-regular	0.961	0.058	0.034
56	9	CAR	A	slow-regular	0.931	0.113	0.064
56	10	CAR	A	slow-regular	0.923	0.095	0.066
56	13	CAR	A	random	0.91	0.058	0.04
56	1	CAR	A	mono	0.962	0.063	0.037
56	2	DOR	B	mono	0.984	0.072	0.041
56	3	CEF	C	mono	0.989	0.047	0.028
57	8	CEF	C	slow-regular	0.943	0.081	0.048
57	9	CEF	C	slow-regular	0.944	0.108	0.061
57	10	DOR	B	slow-regular	0.885	0.089	0.061
57	13	DOR	B	random	0.79	0.104	0.072
57	15	CAR	A	random	0.968	0.069	0.061
57	14	CEF	C	random	0.933	0.054	0.037
57	5	CEF	C	fast-regular	0.917	0.054	0.043
57	6	CEF	C	fast-regular	0.939	0.054	0.04
57	7	DOR	B	fast-regular	1.016	0.108	0.075
57	16	CAR	A	random	0.952	0.139	0.091
57	11	DOR	B	random	0.847	0.155	0.136
57	12	CEF	C	random	0.987	0.101	0.075
57	1	CAR	A	mono	0.914	0.067	0.039
57	2	DOR	B	mono	0.932	0.089	0.05
57	3	CEF	C	mono	0.964	0.085	0.05
58	8	CEF	C	slow-regular	0.934	0.111	0.065
58	9	CEF	C	slow-regular	0.938	0.086	0.049
58	10	DOR	B	slow-regular	0.935	0.073	0.05
58	15	CAR	A	random	0.929	0.115	0.101
58	12	CAR	A	random	0.911	0.073	0.054
58	14	DOR	B	random	0.824	0.107	0.074
58	5	CAR	A	fast-regular	0.87	0.128	0.102
58	6	DOR	B	fast-regular	0.896	0.068	0.05
58	7	CEF	C	fast-regular	0.924	0.066	0.046
58	11	CAR	A	random	0.865	0.135	0.118
58	13	CEF	C	random	0.883	0.07	0.049
58	16	CAR	A	random	0.928	0.097	0.064
58	1	CAR	A	mono	0.878	0.102	0.06
58	2	DOR	B	mono	0.918	0.101	0.057
58	3	CEF	C	mono	0.875	0.057	0.034
59	13	DOR	B	random	0.892	0.146	0.101
59	8	CEF	C	slow-regular	0.935	0.05	0.03
59	9	CEF	C	slow-regular	0.965	0.068	0.038
59	10	DOR	B	slow-regular	0.969	0.028	0.02
59	5	DOR	B	fast-regular	0.929	0.057	0.046
59	6	CAR	A	fast-regular	0.951	0.059	0.044
59	7	CAR	A	fast-regular	0.881	0.076	0.052
59	12	DOR	B	random	0.983	0.097	0.072
59	16	CEF	C	random	0.953	0.034	0.022
59	11	DOR	B	random	0.803	0.155	0.136
59	14	CAR	A	random	0.903	0.082	0.057
59	15	CEF	C	random	0.949	0.02	0.018
59	1	CAR	A	mono	0.886	0.06	0.036
59	2	DOR	B	mono	0.942	0.074	0.042
59	3	CEF	C	mono	0.905	0.066	0.039
60	11	CEF	C	random	0.998	0.07	0.061
60	5	CEF	C	fast-regular	1.014	0.078	0.062
60	6	CEF	C	fast-regular	1	0.061	0.045
60	7	DOR	B	fast-regular	0.974	0.034	0.024
60	8	CEF	C	slow-regular	0.992	0.067	0.04
60	9	CEF	C	slow-regular	1.013	0.083	0.047
60	10	DOR	B	slow-regular	1.045	0.061	0.042
60	14	DOR	B	random	0.949	0.137	0.095
60	15	DOR	B	random	1.079	0.133	0.117
60	16	DOR	B	random	1.02	0.123	0.08
60	12	CEF	C	random	1.014	0.08	0.059
60	13	CEF	C	random	0.97	0.043	0.03
60	1	CAR	A	mono	0.935	0.079	0.047
60	2	DOR	B	mono	0.993	0.07	0.039
60	3	CEF	C	mono	0.974	0.073	0.043
61	13	DOR	B	random	0.879	0.067	0.046
61	15	CAR	A	random	0.929	0.062	0.055
61	12	CAR	A	random	0.865	0.086	0.064
61	5	CAR	A	fast-regular	0.855	0.088	0.071
61	6	DOR	B	fast-regular	0.893	0.123	0.091
61	7	CEF	C	fast-regular	0.946	0.085	0.059
61	8	CAR	A	slow-regular	0.869	0.06	0.036
61	9	DOR	B	slow-regular	0.84	0.137	0.078
61	10	CEF	C	slow-regular	0.946	0.094	0.065
61	16	CAR	A	random	0.958	0.087	0.057
61	11	DOR	B	random	0.84	0.083	0.073
61	14	CAR	A	random	0.894	0.069	0.048
61	1	CAR	A	mono	0.88	0.062	0.037
61	2	DOR	B	mono	0.891	0.091	0.052
61	3	CEF	C	mono	0.872	0.07	0.041
62	11	CEF	C	random	0.946	0.063	0.056
62	13	DOR	B	random	0.886	0.05	0.035
62	5	DOR	B	fast-regular	0.894	0.053	0.043
62	6	CAR	A	fast-regular	0.918	0.03	0.022
62	7	CAR	A	fast-regular	0.889	0.05	0.035
62	12	DOR	B	random	0.914	0.075	0.055
62	16	CEF	C	random	0.987	0.061	0.04
62	8	CAR	A	slow-regular	0.898	0.066	0.039
62	9	DOR	B	slow-regular	0.912	0.127	0.072
62	10	CEF	C	slow-regular	0.954	0.093	0.064
62	15	CEF	C	random	0.984	0.046	0.04
62	14	CAR	A	random	0.896	0.062	0.043
62	1	CAR	A	mono	0.885	0.081	0.048
62	2	DOR	B	mono	0.957	0.105	0.06
62	3	CEF	C	mono	0.93	0.045	0.027
63	14	CEF	C	random	0.917	0.044	0.031
63	5	CEF	C	fast-regular	0.905	0.023	0.018
63	6	CEF	C	fast-regular	0.888	0.03	0.022
63	7	DOR	B	fast-regular	0.896	0.045	0.031
63	11	CEF	C	random	0.924	0.067	0.059
63	12	CEF	C	random	0.94	0.078	0.058
63	13	CEF	C	random	0.891	0.046	0.032
63	16	CAR	A	random	0.958	0.062	0.041
63	8	CAR	A	slow-regular	0.854	0.061	0.036
63	9	DOR	B	slow-regular	0.977	0.121	0.069
63	10	CEF	C	slow-regular	0.914	0.046	0.032
63	15	CEF	C	random	0.965	0.078	0.068
63	1	CAR	A	mono	0.89	0.078	0.046
63	2	DOR	B	mono	0.922	0.086	0.048
63	3	CEF	C	mono	0.909	0.055	0.033
64	14	CEF	C	random	0.952	0.09	0.062
64	15	CAR	A	random	1.014	0.075	0.066
64	5	CAR	A	fast-regular	0.886	0.091	0.073
64	6	DOR	B	fast-regular	0.961	0.12	0.089
64	7	CEF	C	fast-regular	0.944	0.063	0.043
64	11	CEF	C	random	0.939	0.079	0.069
64	12	CEF	C	random	0.986	0.07	0.052
64	13	CEF	C	random	0.912	0.04	0.028
64	16	CAR	A	random	0.953	0.075	0.049
64	8	CAR	A	slow-regular	0.899	0.092	0.054
64	9	DOR	B	slow-regular	0.978	0.099	0.056
64	10	CEF	C	slow-regular	0.95	0.034	0.023
64	1	CAR	A	mono	0.919	0.078	0.046
64	2	DOR	B	mono	0.937	0.048	0.027
64	3	CEF	C	mono	0.918	0.048	0.029
65	8	DOR	B	slow-regular	0.811	0.115	0.068
65	9	CAR	A	slow-regular	0.965	0.075	0.043
65	10	CAR	A	slow-regular	0.909	0.051	0.035
65	14	DOR	B	random	0.879	0.076	0.052
65	15	DOR	B	random	0.946	0.119	0.104
65	5	DOR	B	fast-regular	0.873	0.099	0.079
65	6	CAR	A	fast-regular	0.916	0.067	0.049
65	7	CAR	A	fast-regular	0.878	0.085	0.059
65	11	DOR	B	random	0.852	0.193	0.169
65	12	CEF	C	random	0.927	0.018	0.014
65	13	CEF	C	random	0.907	0.056	0.039
65	16	CAR	A	random	0.936	0.066	0.043
65	1	CAR	A	mono	0.865	0.069	0.041
65	2	DOR	B	mono	0.902	0.062	0.035
65	3	CEF	C	mono	0.917	0.084	0.05
66	11	CAR	A	random	0.881	0.057	0.05
66	13	DOR	B	random	0.88	0.06	0.042
66	15	CAR	A	random	0.927	0.068	0.059
66	5	CEF	C	fast-regular	0.925	0.026	0.021
66	6	CEF	C	fast-regular	0.905	0.057	0.042
66	7	DOR	B	fast-regular	0.91	0.084	0.058
66	8	DOR	B	slow-regular	0.867	0.137	0.081
66	9	CAR	A	slow-regular	0.888	0.087	0.049
66	10	CAR	A	slow-regular	0.864	0.06	0.042
66	12	DOR	B	random	0.897	0.062	0.046
66	16	CEF	C	random	0.985	0.093	0.061
66	14	CAR	A	random	0.856	0.033	0.023
66	1	CAR	A	mono	0.861	0.086	0.051
66	2	DOR	B	mono	0.852	0.061	0.035
66	3	CEF	C	mono	0.901	0.081	0.048
67	16	DOR	B	random	1.005	0.106	0.069
67	13	CAR	A	random	0.91	0.098	0.068
67	5	CAR	A	fast-regular	0.93	0.079	0.063
67	6	DOR	B	fast-regular	0.956	0.064	0.047
67	7	CEF	C	fast-regular	0.966	0.035	0.025
67	8	DOR	B	slow-regular	0.996	0.094	0.056
67	9	CAR	A	slow-regular	0.898	0.098	0.055
67	10	CAR	A	slow-regular	0.9	0.06	0.042
67	11	CEF	C	random	0.951	0.059	0.052
67	12	DOR	B	random	1.003	0.082	0.061
67	15	CEF	C	random	0.991	0.065	0.057
67	14	CAR	A	random	0.936	0.088	0.061
67	1	CAR	A	mono	0.903	0.079	0.047
67	2	DOR	B	mono	0.934	0.049	0.028
67	3	CEF	C	mono	0.945	0.065	0.039
68	5	DOR	B	fast-regular	0.95	0.052	0.041
68	6	CAR	A	fast-regular	0.967	0.063	0.047
68	7	CAR	A	fast-regular	0.917	0.092	0.064
68	16	CEF	C	random	1.047	0.073	0.048
68	8	DOR	B	slow-regular	0.992	0.046	0.027
68	9	CAR	A	slow-regular	0.963	0.073	0.041
68	10	CAR	A	slow-regular	0.908	0.079	0.055
68	11	DOR	B	random	0.884	0.14	0.122
68	12	CEF	C	random	0.967	0.026	0.019
68	13	CEF	C	random	0.932	0.051	0.035
68	15	CEF	C	random	1.091	0.078	0.069
68	14	CAR	A	random	0.912	0.048	0.033
68	1	CAR	A	mono	0.926	0.084	0.05
68	2	DOR	B	mono	0.998	0.096	0.054
68	3	CEF	C	mono	0.949	0.069	0.04
69	8	CEF	C	slow-regular	0.97	0.071	0.042
69	9	CEF	C	slow-regular	0.963	0.082	0.047
69	10	DOR	B	slow-regular	0.881	0.096	0.067
69	12	CAR	A	random	0.939	0.066	0.049
69	11	CAR	A	random	0.926	0.102	0.089
69	14	DOR	B	random	0.841	0.136	0.094
69	5	CEF	C	fast-regular	0.956	0.049	0.039
69	6	CEF	C	fast-regular	0.943	0.058	0.043
69	7	DOR	B	fast-regular	0.924	0.045	0.031
69	16	CAR	A	random	0.959	0.08	0.052
69	13	CEF	C	random	0.943	0.086	0.06
69	15	CEF	C	random	0.988	0.045	0.039
69	1	CAR	A	mono	0.903	0.084	0.05
69	2	DOR	B	mono	0.94	0.083	0.047
69	3	CEF	C	mono	0.929	0.07	0.041
70	8	CEF	C	slow-regular	0.974	0.079	0.047
70	9	CEF	C	slow-regular	1.007	0.097	0.055
70	10	DOR	B	slow-regular	1.049	0.092	0.064
70	12	CAR	A	random	0.872	0.079	0.059
70	15	DOR	B	random	1.013	0.139	0.122
70	16	DOR	B	random	0.998	0.113	0.074
70	13	CAR	A	random	0.917	0.053	0.037
70	14	DOR	B	random	0.898	0.112	0.078
70	5	CAR	A	fast-regular	0.934	0.08	0.064
70	6	DOR	B	fast-regular	0.957	0.117	0.087
70	7	CEF	C	fast-regular	0.962	0.027	0.019
70	11	CEF	C	random	0.938	0.063	0.055
70	1	CAR	A	mono	0.946	0.076	0.045
70	2	DOR	B	mono	0.995	0.104	0.059
70	3	CEF	C	mono	0.961	0.075	0.044
71	14	CEF	C	random	0.918	0.075	0.052
71	8	CEF	C	slow-regular	0.883	0.077	0.045
71	9	CEF	C	slow-regular	0.911	0.074	0.042
71	10	DOR	B	slow-regular	0.951	0.07	0.049
71	15	DOR	B	random	0.946	0.099	0.086
71	16	DOR	B	random	0.946	0.112	0.073
71	5	DOR	B	fast-regular	0.905	0.066	0.053
71	6	CAR	A	fast-regular	0.897	0.095	0.071
71	7	CAR	A	fast-regular	0.881	0.062	0.043
71	13	CAR	A	random	0.811	0.09	0.062
71	11	DOR	B	random	0.879	0.122	0.107
71	12	CEF	C	random	0.856	0.069	0.051
71	1	CAR	A	mono	0.867	0.068	0.04
71	2	DOR	B	mono	0.896	0.086	0.049
71	3	CEF	C	mono	0.879	0.069	0.041
72	13	DOR	B	random	0.892	0.078	0.054
72	15	CAR	A	random	0.969	0.055	0.048
72	11	CAR	A	random	0.922	0.106	0.093
72	12	CAR	A	random	0.943	0.142	0.105
72	5	CEF	C	fast-regular	0.949	0.034	0.028
72	6	CEF	C	fast-regular	0.974	0.073	0.054
72	7	DOR	B	fast-regular	0.978	0.081	0.056
72	8	CEF	C	slow-regular	0.96	0.071	0.042
72	9	CEF	C	slow-regular	1.028	0.078	0.044
72	10	DOR	B	slow-regular	1.004	0.077	0.054
72	14	DOR	B	random	0.931	0.094	0.065
72	16	CEF	C	random	1.02	0.079	0.052
72	1	CAR	A	mono	0.929	0.075	0.044
72	2	DOR	B	mono	0.955	0.077	0.044
72	3	CEF	C	mono	0.933	0.07	0.042
73	15	CAR	A	random	0.935	0.098	0.086
73	11	CAR	A	random	0.904	0.105	0.092
73	12	CAR	A	random	0.924	0.144	0.107
73	5	CAR	A	fast-regular	0.895	0.108	0.086
73	6	DOR	B	fast-regular	0.934	0.097	0.072
73	7	CEF	C	fast-regular	0.95	0.093	0.064
73	8	CAR	A	slow-regular	0.932	0.097	0.057
73	9	DOR	B	slow-regular	0.898	0.1	0.056
73	10	CEF	C	slow-regular	0.961	0.077	0.053
73	14	DOR	B	random	0.963	0.102	0.071
73	16	CEF	C	random	1.004	0.073	0.048
73	13	CEF	C	random	0.942	0.073	0.051
73	1	CAR	A	mono	0.925	0.079	0.047
73	2	DOR	B	mono	0.925	0.124	0.07
73	3	CEF	C	mono	0.931	0.074	0.044
74	14	CEF	C	random	0.949	0.031	0.021
74	13	DOR	B	random	0.947	0.02	0.014
74	15	DOR	B	random	0.923	0.128	0.112
74	5	DOR	B	fast-regular	0.962	0.033	0.027
74	6	CAR	A	fast-regular	0.941	0.039	0.029
74	7	CAR	A	fast-regular	0.877	0.066	0.046
74	11	CEF	C	random	0.903	0.066	0.058
74	12	CAR	A	random	0.911	0.114	0.084
74	8	CAR	A	slow-regular	0.897	0.095	0.056
74	9	DOR	B	slow-regular	0.938	0.109	0.062
74	10	CEF	C	slow-regular	0.96	0.044	0.031
74	16	CEF	C	random	0.979	0.075	0.049
74	1	CAR	A	mono	0.897	0.067	0.04
74	2	DOR	B	mono	0.938	0.056	0.031
74	3	CEF	C	mono	0.933	0.074	0.043
75	15	CAR	A	random	0.969	0.067	0.058
75	5	CEF	C	fast-regular	0.988	0.071	0.056
75	6	CEF	C	fast-regular	0.98	0.108	0.08
75	7	DOR	B	fast-regular	0.992	0.092	0.063
75	11	DOR	B	random	0.927	0.088	0.077
75	16	CAR	A	random	0.97	0.072	0.047
75	8	CAR	A	slow-regular	0.915	0.073	0.043
75	9	DOR	B	slow-regular	0.964	0.098	0.055
75	10	CEF	C	slow-regular	0.997	0.064	0.045
75	12	CEF	C	random	0.972	0.071	0.053
75	13	CEF	C	random	0.958	0.055	0.038
75	14	CAR	A	random	0.936	0.071	0.049
75	1	CAR	A	mono	0.914	0.069	0.041
75	2	DOR	B	mono	0.969	0.077	0.044
75	3	CEF	C	mono	0.962	0.07	0.042
76	12	DOR	B	random	1	0.076	0.056
76	13	DOR	B	random	0.945	0.03	0.021
76	16	DOR	B	random	0.973	0.099	0.064
76	11	CAR	A	random	0.913	0.076	0.067
76	15	DOR	B	random	0.926	0.075	0.066
76	5	CAR	A	fast-regular	0.904	0.091	0.073
76	6	DOR	B	fast-regular	0.941	0.078	0.058
76	7	CEF	C	fast-regular	0.937	0.066	0.046
76	14	DOR	B	random	0.953	0.087	0.06
76	8	CAR	A	slow-regular	0.889	0.081	0.048
76	9	DOR	B	slow-regular	0.974	0.056	0.031
76	10	CEF	C	slow-regular	1.001	0.055	0.038
76	1	CAR	A	mono	0.917	0.089	0.052
76	2	DOR	B	mono	0.976	0.069	0.039
76	3	CEF	C	mono	0.963	0.088	0.052
77	14	CEF	C	random	0.918	0.034	0.023
77	8	DOR	B	slow-regular	0.878	0.071	0.042
77	9	CAR	A	slow-regular	0.935	0.046	0.026
77	10	CAR	A	slow-regular	0.905	0.038	0.026
77	13	CAR	A	random	0.861	0.06	0.041
77	5	DOR	B	fast-regular	0.934	0.081	0.065
77	6	CAR	A	fast-regular	0.913	0.036	0.026
77	7	CAR	A	fast-regular	0.878	0.084	0.058
77	11	CEF	C	random	0.907	0.05	0.044
77	16	CEF	C	random	0.989	0.059	0.038
77	12	CEF	C	random	0.941	0.076	0.056
77	15	CEF	C	random	1.056	0.066	0.058
77	1	CAR	A	mono	0.877	0.091	0.054
77	2	DOR	B	mono	0.944	0.08	0.046
77	3	CEF	C	mono	0.945	0.068	0.04
78	14	CEF	C	random	0.954	0.057	0.039
78	12	DOR	B	random	1.048	0.106	0.079
78	13	DOR	B	random	0.91	0.074	0.051
78	15	CAR	A	random	1.01	0.038	0.034
78	16	DOR	B	random	1.064	0.1	0.065
78	5	CEF	C	fast-regular	0.954	0.037	0.029
78	6	CEF	C	fast-regular	0.918	0.056	0.042
78	7	DOR	B	fast-regular	0.955	0.034	0.024
78	8	DOR	B	slow-regular	0.965	0.069	0.041
78	9	CAR	A	slow-regular	0.937	0.095	0.054
78	10	CAR	A	slow-regular	0.882	0.139	0.097
78	11	CAR	A	random	0.907	0.081	0.071
78	1	CAR	A	mono	0.914	0.055	0.033
78	2	DOR	B	mono	0.94	0.036	0.02
78	3	CEF	C	mono	0.987	0.062	0.037
79	14	CEF	C	random	0.94	0.077	0.053
79	12	CAR	A	random	0.95	0.07	0.052
79	15	DOR	B	random	0.976	0.134	0.117
79	5	CAR	A	fast-regular	0.905	0.074	0.06
79	6	DOR	B	fast-regular	0.927	0.078	0.058
79	7	CEF	C	fast-regular	0.919	0.045	0.031
79	8	DOR	B	slow-regular	0.939	0.036	0.021
79	9	CAR	A	slow-regular	0.938	0.057	0.032
79	10	CAR	A	slow-regular	0.864	0.091	0.063
79	11	CEF	C	random	0.934	0.064	0.056
79	16	CEF	C	random	1.017	0.074	0.048
79	13	CEF	C	random	0.944	0.064	0.044
79	1	CAR	A	mono	0.913	0.082	0.048
79	2	DOR	B	mono	0.972	0.071	0.04
79	3	CEF	C	mono	0.937	0.077	0.046
80	12	DOR	B	random	1.029	0.123	0.091
80	13	DOR	B	random	0.973	0.036	0.025
80	14	CEF	C	random	0.96	0.071	0.049
80	5	DOR	B	fast-regular	0.964	0.047	0.037
80	6	CAR	A	fast-regular	0.99	0.056	0.041
80	7	CAR	A	fast-regular	0.942	0.083	0.057
80	11	DOR	B	random	0.97	0.078	0.069
80	15	DOR	B	random	1.105	0.079	0.069
80	16	CAR	A	random	1.018	0.062	0.04
80	8	DOR	B	slow-regular	1.004	0.07	0.041
80	9	CAR	A	slow-regular	0.955	0.085	0.048
80	10	CAR	A	slow-regular	0.908	0.083	0.057
80	1	CAR	A	mono	0.942	0.065	0.038
80	2	DOR	B	mono	0.961	0.028	0.016
80	3	CEF	C	mono	1.004	0.057	0.033
81	8	CEF	C	slow-regular	0.982	0.052	0.031
81	9	CEF	C	slow-regular	0.944	0.071	0.04
81	10	DOR	B	slow-regular	0.877	0.086	0.06
81	15	CAR	A	random	1.003	0.051	0.045
81	16	DOR	B	random	1.007	0.081	0.053
81	5	CEF	C	fast-regular	0.959	0.031	0.025
81	6	CEF	C	fast-regular	0.946	0.04	0.03
81	7	DOR	B	fast-regular	0.968	0.085	0.059
81	12	CAR	A	random	0.947	0.056	0.042
81	14	DOR	B	random	0.957	0.053	0.037
81	11	CEF	C	random	0.98	0.038	0.034
81	13	CEF	C	random	0.946	0.043	0.029
81	1	CAR	A	mono	0.924	0.065	0.039
81	2	DOR	B	mono	0.982	0.09	0.051
81	3	CEF	C	mono	0.961	0.067	0.039
82	8	CEF	C	slow-regular	0.965	0.067	0.04
82	9	CEF	C	slow-regular	0.96	0.077	0.043
82	10	DOR	B	slow-regular	0.99	0.084	0.058
82	13	CAR	A	random	0.877	0.07	0.049
82	11	CAR	A	random	0.908	0.099	0.087
82	15	CAR	A	random	0.938	0.068	0.059
82	5	CAR	A	fast-regular	0.882	0.079	0.064
82	6	DOR	B	fast-regular	0.939	0.112	0.083
82	7	CEF	C	fast-regular	0.956	0.051	0.035
82	12	CAR	A	random	0.99	0.151	0.112
82	14	DOR	B	random	0.97	0.075	0.052
82	16	CAR	A	random	0.973	0.105	0.068
82	1	CAR	A	mono	0.906	0.072	0.042
82	2	DOR	B	mono	0.96	0.094	0.053
82	3	CEF	C	mono	0.946	0.041	0.024
83	8	CEF	C	slow-regular	0.997	0.076	0.045
83	9	CEF	C	slow-regular	1.064	0.106	0.06
83	10	DOR	B	slow-regular	0.978	0.036	0.025
83	13	CAR	A	random	0.876	0.076	0.053
83	16	DOR	B	random	1.043	0.072	0.047
83	5	DOR	B	fast-regular	0.98	0.05	0.04
83	6	CAR	A	fast-regular	0.969	0.062	0.046
83	7	CAR	A	fast-regular	0.925	0.09	0.062
83	11	CAR	A	random	0.91	0.104	0.091
83	15	CAR	A	random	0.915	0.055	0.048
83	12	CEF	C	random	0.984	0.098	0.072
83	14	CAR	A	random	0.941	0.055	0.038
83	1	CAR	A	mono	0.919	0.092	0.054
83	2	DOR	B	mono	0.999	0.086	0.049
83	3	CEF	C	mono	0.974	0.123	0.073
84	13	DOR	B	random	0.842	0.123	0.085
84	5	CEF	C	fast-regular	0.928	0.062	0.05
84	6	CEF	C	fast-regular	0.919	0.088	0.065
84	7	DOR	B	fast-regular	0.955	0.07	0.048
84	8	CEF	C	slow-regular	0.943	0.074	0.044
84	9	CEF	C	slow-regular	0.994	0.069	0.039
84	10	DOR	B	slow-regular	0.996	0.053	0.037
84	15	DOR	B	random	0.928	0.134	0.118
84	11	CAR	A	random	0.914	0.145	0.127
84	12	CAR	A	random	0.922	0.073	0.054
84	16	CEF	C	random	0.993	0.072	0.047
84	14	CAR	A	random	0.91	0.073	0.051
84	1	CAR	A	mono	0.874	0.085	0.05
84	2	DOR	B	mono	0.951	0.104	0.059
84	3	CEF	C	mono	0.995	0.145	0.086
85	12	DOR	B	random	0.955	0.067	0.05
85	14	CEF	C	random	0.935	0.063	0.044
85	13	CAR	A	random	0.904	0.049	0.034
85	5	CAR	A	fast-regular	0.892	0.076	0.061
85	6	DOR	B	fast-regular	0.928	0.147	0.109
85	7	CEF	C	fast-regular	0.939	0.061	0.042
85	8	CAR	A	slow-regular	0.897	0.061	0.036
85	9	DOR	B	slow-regular	0.965	0.119	0.067
85	10	CEF	C	slow-regular	0.929	0.06	0.041
85	15	DOR	B	random	1	0.078	0.068
85	11	CAR	A	random	0.874	0.08	0.07
85	16	CEF	C	random	1.012	0.073	0.048
85	1	CAR	A	mono	0.899	0.052	0.031
85	2	DOR	B	mono	0.933	0.092	0.052
85	3	CEF	C	mono	0.938	0.067	0.039
86	11	DOR	B	random	0.884	0.122	0.107
86	12	DOR	B	random	0.953	0.035	0.026
86	13	DOR	B	random	0.875	0.044	0.03
86	5	DOR	B	fast-regular	0.964	0.076	0.061
86	6	CAR	A	fast-regular	0.939	0.045	0.033
86	7	CAR	A	fast-regular	0.894	0.086	0.06
86	14	DOR	B	random	0.966	0.041	0.029
86	15	CEF	C	random	0.997	0.081	0.071
86	8	CAR	A	slow-regular	0.881	0.07	0.042
86	9	DOR	B	slow-regular	0.96	0.084	0.048
86	10	CEF	C	slow-regular	0.924	0.027	0.019
86	16	CEF	C	random	1.049	0.103	0.067
86	1	CAR	A	mono	0.918	0.086	0.051
86	2	DOR	B	mono	0.965	0.086	0.049
86	3	CEF	C	mono	0.968	0.07	0.042
87	14	CEF	C	random	0.956	0.038	0.026
87	16	DOR	B	random	1.051	0.117	0.077
87	5	CEF	C	fast-regular	0.944	0.087	0.069
87	6	CEF	C	fast-regular	0.915	0.053	0.04
87	7	DOR	B	fast-regular	0.897	0.063	0.044
87	13	DOR	B	random	0.936	0.032	0.022
87	15	CAR	A	random	0.984	0.075	0.066
87	12	CEF	C	random	0.938	0.038	0.028
87	8	CAR	A	slow-regular	0.851	0.083	0.049
87	9	DOR	B	slow-regular	0.944	0.097	0.055
87	10	CEF	C	slow-regular	0.959	0.094	0.065
87	11	CAR	A	random	0.874	0.087	0.076
87	1	CAR	A	mono	0.906	0.068	0.04
87	2	DOR	B	mono	0.93	0.079	0.045
87	3	CEF	C	mono	1.003	0.118	0.07
88	11	CEF	C	random	0.924	0.113	0.099
88	16	CAR	A	random	0.981	0.072	0.047
88	5	CAR	A	fast-regular	0.886	0.071	0.056
88	6	DOR	B	fast-regular	0.898	0.126	0.094
88	7	CEF	C	fast-regular	0.88	0.04	0.028
88	12	CAR	A	random	0.85	0.038	0.028
88	14	DOR	B	random	0.945	0.073	0.051
88	15	CAR	A	random	0.874	0.061	0.053
88	13	CEF	C	random	0.901	0.059	0.041
88	8	CAR	A	slow-regular	0.854	0.081	0.048
88	9	DOR	B	slow-regular	0.953	0.077	0.044
88	10	CEF	C	slow-regular	0.96	0.077	0.053
88	1	CAR	A	mono	0.897	0.065	0.039
88	2	DOR	B	mono	0.913	0.072	0.041
88	3	CEF	C	mono	0.939	0.047	0.028
89	8	DOR	B	slow-regular	0.894	0.058	0.034
89	9	CAR	A	slow-regular	0.971	0.047	0.026
89	10	CAR	A	slow-regular	0.92	0.029	0.02
89	11	DOR	B	random	0.95	0.052	0.046
89	14	CEF	C	random	0.945	0.051	0.035
89	5	DOR	B	fast-regular	0.951	0.047	0.038
89	6	CAR	A	fast-regular	0.943	0.058	0.043
89	7	CAR	A	fast-regular	0.886	0.058	0.04
89	15	CEF	C	random	0.985	0.069	0.061
89	12	CAR	A	random	0.866	0.058	0.043
89	13	CEF	C	random	0.945	0.072	0.05
89	16	CEF	C	random	0.997	0.082	0.053
89	1	CAR	A	mono	0.921	0.07	0.041
89	2	DOR	B	mono	0.969	0.082	0.047
89	3	CEF	C	mono	0.947	0.037	0.022
90	13	CAR	A	random	0.886	0.092	0.064
90	16	DOR	B	random	1.059	0.092	0.06
90	5	CEF	C	fast-regular	0.943	0.073	0.058
90	6	CEF	C	fast-regular	0.927	0.064	0.047
90	7	DOR	B	fast-regular	0.949	0.065	0.045
90	8	DOR	B	slow-regular	0.975	0.093	0.055
90	9	CAR	A	slow-regular	0.946	0.091	0.051
90	10	CAR	A	slow-regular	0.884	0.149	0.103
90	11	DOR	B	random	0.962	0.13	0.114
90	15	DOR	B	random	1.027	0.115	0.101
90	12	CEF	C	random	0.976	0.153	0.113
90	14	CAR	A	random	0.88	0.104	0.072
90	1	CAR	A	mono	0.904	0.078	0.046
90	2	DOR	B	mono	0.961	0.079	0.045
90	3	CEF	C	mono	0.972	0.073	0.043
91	12	DOR	B	random	0.985	0.124	0.092
91	11	CEF	C	random	0.979	0.089	0.078
91	13	CAR	A	random	0.884	0.1	0.069
91	14	CEF	C	random	0.935	0.124	0.086
91	16	CAR	A	random	0.999	0.079	0.051
91	5	CAR	A	fast-regular	0.934	0.113	0.09
91	6	DOR	B	fast-regular	0.95	0.131	0.097
91	7	CEF	C	fast-regular	0.993	0.066	0.046
91	8	DOR	B	slow-regular	0.988	0.097	0.057
91	9	CAR	A	slow-regular	0.933	0.049	0.028
91	10	CAR	A	slow-regular	0.886	0.137	0.095
91	15	CEF	C	random	0.994	0.093	0.082
91	1	CAR	A	mono	0.923	0.075	0.045
91	2	DOR	B	mono	0.956	0.09	0.051
91	3	CEF	C	mono	0.997	0.088	0.052
92	13	DOR	B	random	0.928	0.081	0.056
92	5	DOR	B	fast-regular	0.938	0.043	0.035
92	6	CAR	A	fast-regular	0.907	0.064	0.048
92	7	CAR	A	fast-regular	0.899	0.073	0.051
92	11	CEF	C	random	0.934	0.055	0.048
92	14	DOR	B	random	0.994	0.104	0.072
92	15	CAR	A	random	0.99	0.072	0.063
92	16	CAR	A	random	1.012	0.092	0.06
92	8	DOR	B	slow-regular	0.975	0.057	0.034
92	9	CAR	A	slow-regular	0.939	0.072	0.041
92	10	CAR	A	slow-regular	0.885	0.11	0.076
92	12	CEF	C	random	1.002	0.092	0.068
92	1	CAR	A	mono	0.898	0.073	0.043
92	2	DOR	B	mono	0.983	0.085	0.048
92	3	CEF	C	mono	0.965	0.079	0.047
93	8	CEF	C	slow-regular	0.971	0.043	0.025
93	9	CEF	C	slow-regular	0.965	0.081	0.046
93	10	DOR	B	slow-regular	0.881	0.084	0.058
93	12	DOR	B	random	0.966	0.052	0.039
93	16	DOR	B	random	1.038	0.095	0.062
93	5	CEF	C	fast-regular	0.948	0.035	0.028
93	6	CEF	C	fast-regular	0.966	0.104	0.077
93	7	DOR	B	fast-regular	0.954	0.108	0.075
93	13	DOR	B	random	0.952	0.045	0.031
93	15	DOR	B	random	1.082	0.074	0.065
93	11	CAR	A	random	0.897	0.078	0.068
93	14	DOR	B	random	0.986	0.056	0.038
93	1	CAR	A	mono	0.904	0.065	0.038
93	2	DOR	B	mono	0.995	0.104	0.059
93	3	CEF	C	mono	0.98	0.06	0.036
94	8	CEF	C	slow-regular	0.999	0.111	0.066
94	9	CEF	C	slow-regular	1.072	0.05	0.028
94	10	DOR	B	slow-regular	0.966	0.044	0.031
94	12	DOR	B	random	1.007	0.092	0.068
94	14	CEF	C	random	0.963	0.04	0.028
94	5	CAR	A	fast-regular	0.893	0.095	0.076
94	6	DOR	B	fast-regular	0.973	0.068	0.051
94	7	CEF	C	fast-regular	0.937	0.033	0.023
94	11	CEF	C	random	0.967	0.088	0.078
94	13	DOR	B	random	1.012	0.064	0.044
94	15	CAR	A	random	1.048	0.091	0.08
94	16	CAR	A	random	1.001	0.078	0.051
94	1	CAR	A	mono	0.923	0.083	0.049
94	2	DOR	B	mono	0.971	0.063	0.036
94	3	CEF	C	mono	0.96	0.073	0.043
95	8	CEF	C	slow-regular	0.983	0.139	0.082
95	9	CEF	C	slow-regular	1.021	0.059	0.033
95	10	DOR	B	slow-regular	0.995	0.062	0.043
95	11	DOR	B	random	0.95	0.069	0.06
95	13	CAR	A	random	0.926	0.065	0.045
95	16	DOR	B	random	0.995	0.111	0.073
95	5	DOR	B	fast-regular	0.962	0.034	0.027
95	6	CAR	A	fast-regular	0.968	0.04	0.029
95	7	CAR	A	fast-regular	0.882	0.041	0.028
95	12	DOR	B	random	1.007	0.096	0.071
95	14	CAR	A	random	0.916	0.096	0.066
95	15	CEF	C	random	1.052	0.058	0.051
95	1	CAR	A	mono	0.916	0.068	0.04
95	2	DOR	B	mono	0.955	0.041	0.023
95	3	CEF	C	mono	0.987	0.069	0.041
96	5	CEF	C	fast-regular	0.976	0.07	0.056
96	6	CEF	C	fast-regular	0.947	0.074	0.055
96	7	DOR	B	fast-regular	0.952	0.092	0.064
96	8	CEF	C	slow-regular	0.953	0.141	0.083
96	9	CEF	C	slow-regular	1.015	0.096	0.054
96	10	DOR	B	slow-regular	1.028	0.086	0.06
96	11	DOR	B	random	0.93	0.066	0.058
96	12	CAR	A	random	0.975	0.079	0.059
96	13	CAR	A	random	0.851	0.083	0.058
96	14	CEF	C	random	0.967	0.092	0.064
96	15	DOR	B	random	1.117	0.058	0.051
96	16	DOR	B	random	1.085	0.084	0.055
96	1	CAR	A	mono	0.928	0.071	0.042
96	2	DOR	B	mono	0.965	0.08	0.045
96	3	CEF	C	mono	0.967	0.049	0.029

## Sheet: FigS4_B
time_A	ab	drug	mean.fast_regular	mean.mono	diff
1	CAR	A	0.282	NA	0
1	CEF	C	0.548	NA	0
1	DOR	B	0.49	NA	0
2	CAR	A	0.672	0.322	0.35
2	CEF	C	0.794	0.329	0.465
2	DOR	B	0.609	0.344	0.265
3	CAR	A	0.735	0.708	0.027
3	CEF	C	0.791	0.802	-0.011
3	DOR	B	0.683	0.611	0.072
4	CAR	A	0.784	0.795	-0.011
4	CEF	C	0.824	0.857	-0.033
4	DOR	B	0.733	0.75	-0.017
5	CAR	A	0.844	0.75	0.094
5	CEF	C	0.865	0.872	-0.007
5	DOR	B	0.772	0.836	-0.064
6	CAR	A	0.858	0.832	0.026
6	CEF	C	0.9	0.894	0.006
6	DOR	B	0.757	0.915	-0.158
7	CAR	A	0.891	0.772	0.119
7	CEF	C	0.901	0.842	0.059
7	DOR	B	0.796	0.846	-0.05
8	CAR	A	0.868	0.746	0.122
8	CEF	C	0.888	0.908	-0.02
8	DOR	B	0.82	0.901	-0.081
9	CAR	A	0.898	0.763	0.135
9	CEF	C	0.912	0.895	0.017
9	DOR	B	0.811	0.875	-0.064
10	CAR	A	0.888	0.937	-0.049
10	CEF	C	0.915	0.901	0.014
10	DOR	B	0.814	0.852	-0.038
11	CAR	A	0.951	0.817	0.134
11	CEF	C	0.965	0.891	0.074
11	DOR	B	0.852	0.855	-0.003
12	CAR	A	0.907	0.746	0.161
12	CEF	C	0.959	0.894	0.065
12	DOR	B	0.856	0.855	0.001
13	CAR	A	0.898	0.802	0.096
13	CEF	C	0.947	0.914	0.033
13	DOR	B	0.831	0.894	-0.063
14	CAR	A	0.937	0.765	0.172
14	CEF	C	0.957	0.898	0.059
14	DOR	B	0.88	0.882	-0.002
15	CAR	A	0.917	0.795	0.122
15	CEF	C	0.925	0.888	0.037
15	DOR	B	0.849	0.895	-0.046
16	CAR	A	0.911	0.781	0.13
16	CEF	C	0.947	0.921	0.026
16	DOR	B	0.864	0.899	-0.035
17	CAR	A	0.907	0.801	0.106
17	CEF	C	0.889	0.914	-0.025
17	DOR	B	0.884	0.846	0.038
18	CAR	A	0.918	0.836	0.082
18	CEF	C	0.938	0.888	0.05
18	DOR	B	0.93	0.885	0.045
19	CAR	A	0.949	0.832	0.117
19	CEF	C	0.942	0.917	0.025
19	DOR	B	0.966	0.937	0.029
20	CAR	A	0.901	0.803	0.098
20	CEF	C	0.979	0.883	0.096
20	DOR	B	0.933	0.896	0.037
21	CAR	A	0.887	0.817	0.07
21	CEF	C	0.913	0.885	0.028
21	DOR	B	0.894	0.908	-0.014
22	CAR	A	0.893	0.813	0.08
22	CEF	C	0.925	0.866	0.059
22	DOR	B	0.915	0.914	0.001
23	CAR	A	0.938	0.856	0.082
23	CEF	C	0.955	0.885	0.07
23	DOR	B	0.943	0.945	-0.002
24	CAR	A	0.904	0.86	0.044
24	CEF	C	0.962	0.906	0.056
24	DOR	B	0.947	0.931	0.016
25	CAR	A	0.904	0.88	0.024
25	CEF	C	0.973	0.897	0.076
25	DOR	B	0.963	0.819	0.144
26	CAR	A	0.898	0.901	-0.003
26	CEF	C	0.936	0.916	0.02
26	DOR	B	0.943	0.915	0.028
27	CAR	A	0.946	0.858	0.088
27	CEF	C	0.941	0.855	0.086
27	DOR	B	0.953	0.897	0.056
28	CAR	A	0.925	0.865	0.06
28	CEF	C	0.934	0.888	0.046
28	DOR	B	0.958	0.884	0.074
29	CAR	A	0.908	0.869	0.039
29	CEF	C	0.933	0.915	0.018
29	DOR	B	0.93	0.909	0.021
30	CAR	A	0.905	0.85	0.055
30	CEF	C	0.917	0.879	0.038
30	DOR	B	0.933	0.891	0.042
31	CAR	A	0.913	0.919	-0.006
31	CEF	C	0.969	0.941	0.028
31	DOR	B	0.947	0.932	0.015
32	CAR	A	0.914	0.913	0.001
32	CEF	C	0.953	0.935	0.018
32	DOR	B	0.962	0.887	0.075
