# Supplementary material for: High potency of sequential therapy with only β-lactam antibiotics
Source: eLife. 2021 Jul 28;10:e68876. doi: 10.7554/eLife.68876 (PMC8456660; doi:10.7554/eLife.68876)
Supplement: Figure 2—figure supplement 2—source data 1. [file elife-68876-fig2-figsupp2-data1.xlsx]

## Sheet: Fig_S2
population	isolate	cluster	ab	id	conc	transfer	evoexp_plate	evoexp_well	evoexp_ID	treatment	run_number	plate_number	well	od_bg	rgr	inhibition
12-3a-A1	12-3a-A1-1	1	CAR	8	560	12	3a	A1	10	slow-regular	18	1	A2	0.017	0.071	92.9
12-3a-A1	12-3a-A1-1	1	CEF	1	0.6	12	3a	A1	10	slow-regular	18	1	D2	0.077	0.407	59.3
12-3a-A1	12-3a-A1-1	1	DOR	0	0	12	3a	A1	10	slow-regular	38	1	C2	0.198	0.85	15
12-3a-A1	12-3a-A1-1	1	GEN	0.125	85	12	3a	A1	10	slow-regular	18	1	E2	0.231	0.991	0.9
12-3a-A1	12-3a-A1-1	1	CAR	0	0	12	3a	A1	10	slow-regular	18	1	C2	0.178	0.742	25.8
12-3a-A1	12-3a-A1-1	1	DOR	2	100	12	3a	A1	10	slow-regular	38	1	F2	0.063	0.27	73
12-3a-A1	12-3a-A1-1	1	CAR	4	280	12	3a	A1	10	slow-regular	18	1	H2	0.013	0.054	94.6
12-3a-A1	12-3a-A1-1	1	CEF	4	2.4	12	3a	A1	10	slow-regular	18	1	H2	0.002	0.011	98.9
12-3a-A1	12-3a-A1-1	1	DOR	1	50	12	3a	A1	10	slow-regular	38	1	D2	0.045	0.193	80.7
12-3a-A1	12-3a-A1-1	1	CEF	0.5	0.3	12	3a	A1	10	slow-regular	18	1	G2	0.165	0.873	12.7
12-3a-A1	12-3a-A1-1	1	DOR	4	200	12	3a	A1	10	slow-regular	38	1	H2	0.002	0.009	99.1
12-3a-A1	12-3a-A1-1	1	CIP	0	0	12	3a	A1	10	slow-regular	18	1	C2	0.18	0.928	7.2
12-3a-A1	12-3a-A1-1	1	DOR	0.125	6.25	12	3a	A1	10	slow-regular	38	1	E2	0.198	0.85	15
12-3a-A1	12-3a-A1-1	1	GEN	0	0	12	3a	A1	10	slow-regular	18	1	C2	0.183	0.785	21.5
12-3a-A1	12-3a-A1-1	1	DOR	0.5	25	12	3a	A1	10	slow-regular	38	1	G2	0.142	0.609	39.1
12-3a-A1	12-3a-A1-1	1	CIP	2	80	12	3a	A1	10	slow-regular	18	1	F2	0.019	0.098	90.2
12-3a-A1	12-3a-A1-1	1	GEN	4	2720	12	3a	A1	10	slow-regular	18	1	H2	0.001	0.004	99.6
12-3a-A1	12-3a-A1-1	1	CIP	1	40	12	3a	A1	10	slow-regular	18	1	D2	0.092	0.474	52.6
12-3a-A1	12-3a-A1-1	1	CIP	4	160	12	3a	A1	10	slow-regular	18	1	H2	0.001	0.005	99.5
12-3a-A1	12-3a-A1-1	1	CAR	2	140	12	3a	A1	10	slow-regular	18	1	F2	0.021	0.088	91.2
12-3a-A1	12-3a-A1-1	1	GEN	8	5440	12	3a	A1	10	slow-regular	18	1	A2	0.003	0.013	98.7
12-3a-A1	12-3a-A1-1	1	CAR	1	70	12	3a	A1	10	slow-regular	18	1	D2	0.12	0.5	50
12-3a-A1	12-3a-A1-1	1	GEN	0.5	340	12	3a	A1	10	slow-regular	18	1	G2	0.09	0.386	61.4
12-3a-A1	12-3a-A1-1	1	CEF	0.25	0.15	12	3a	A1	10	slow-regular	18	1	B2	0.15	0.794	20.6
12-3a-A1	12-3a-A1-1	1	GEN	0.25	170	12	3a	A1	10	slow-regular	18	1	B2	0.182	0.781	21.9
12-3a-A1	12-3a-A1-1	1	CAR	0.25	17.5	12	3a	A1	10	slow-regular	18	1	B2	0.176	0.733	26.7
12-3a-A1	12-3a-A1-1	1	CIP	0.5	20	12	3a	A1	10	slow-regular	18	1	G2	0.168	0.866	13.4
12-3a-A1	12-3a-A1-1	1	CEF	0.125	0.075	12	3a	A1	10	slow-regular	18	1	E2	0.207	1.095	-9.5
12-3a-A1	12-3a-A1-1	1	GEN	2	1360	12	3a	A1	10	slow-regular	18	1	F2	0	0	100
12-3a-A1	12-3a-A1-1	1	CIP	8	320	12	3a	A1	10	slow-regular	18	1	A2	0.001	0.005	99.5
12-3a-A1	12-3a-A1-1	1	CIP	0.25	10	12	3a	A1	10	slow-regular	18	1	B2	0.171	0.881	11.9
12-3a-A1	12-3a-A1-1	1	CAR	0.125	8.75	12	3a	A1	10	slow-regular	18	1	E2	0.229	0.954	4.6
12-3a-A1	12-3a-A1-1	1	CAR	0.5	35	12	3a	A1	10	slow-regular	18	1	G2	0.207	0.862	13.8
12-3a-A1	12-3a-A1-1	1	CEF	0	0	12	3a	A1	10	slow-regular	18	1	C2	0.151	0.799	20.1
12-3a-A1	12-3a-A1-1	1	DOR	8	400	12	3a	A1	10	slow-regular	38	1	A2	0.014	0.06	94
12-3a-A1	12-3a-A1-1	1	GEN	1	680	12	3a	A1	10	slow-regular	18	1	D2	0.002	0.009	99.1
12-3a-A1	12-3a-A1-1	1	CEF	2	1.2	12	3a	A1	10	slow-regular	18	1	F2	0.001	0.005	99.5
12-3a-A1	12-3a-A1-1	1	CIP	0.125	5	12	3a	A1	10	slow-regular	18	1	E2	0.177	0.912	8.8
12-3a-A1	12-3a-A1-1	1	DOR	0.25	12.5	12	3a	A1	10	slow-regular	38	1	B2	0.201	0.863	13.7
12-3a-A1	12-3a-A1-1	1	CEF	8	4.8	12	3a	A1	10	slow-regular	18	1	A2	0.004	0.021	97.9
12-3a-A1	12-3a-A1-10	1	CAR	0.5	35	12	3a	A1	10	slow-regular	18	1	G11	0.211	0.879	12.1
12-3a-A1	12-3a-A1-10	1	GEN	0.5	340	12	3a	A1	10	slow-regular	18	1	G11	0.072	0.309	69.1
12-3a-A1	12-3a-A1-10	1	CEF	1	0.6	12	3a	A1	10	slow-regular	18	1	D11	0.075	0.397	60.3
12-3a-A1	12-3a-A1-10	1	CEF	4	2.4	12	3a	A1	10	slow-regular	18	1	H11	0.009	0.048	95.2
12-3a-A1	12-3a-A1-10	1	GEN	8	5440	12	3a	A1	10	slow-regular	18	1	A11	0.002	0.009	99.1
12-3a-A1	12-3a-A1-10	1	GEN	1	680	12	3a	A1	10	slow-regular	18	1	D11	0.005	0.021	97.9
12-3a-A1	12-3a-A1-10	1	CAR	0.25	17.5	12	3a	A1	10	slow-regular	18	1	B11	0.179	0.746	25.4
12-3a-A1	12-3a-A1-10	1	CAR	1	70	12	3a	A1	10	slow-regular	18	1	D11	0.109	0.454	54.6
12-3a-A1	12-3a-A1-10	1	CEF	0	0	12	3a	A1	10	slow-regular	18	1	C11	0.154	0.815	18.5
12-3a-A1	12-3a-A1-10	1	CEF	0.5	0.3	12	3a	A1	10	slow-regular	18	1	G11	0.166	0.878	12.2
12-3a-A1	12-3a-A1-10	1	CIP	0.25	10	12	3a	A1	10	slow-regular	18	1	B11	0.213	1.098	-9.8
12-3a-A1	12-3a-A1-10	1	CEF	0.125	0.075	12	3a	A1	10	slow-regular	18	1	E11	0.152	0.804	19.6
12-3a-A1	12-3a-A1-10	1	GEN	2	1360	12	3a	A1	10	slow-regular	18	1	F11	0.007	0.03	97
12-3a-A1	12-3a-A1-10	1	CIP	8	320	12	3a	A1	10	slow-regular	18	1	A11	0	0	100
12-3a-A1	12-3a-A1-10	1	DOR	0.5	25	12	3a	A1	10	slow-regular	38	1	G11	0.141	0.605	39.5
12-3a-A1	12-3a-A1-10	1	DOR	2	100	12	3a	A1	10	slow-regular	38	1	F11	0.019	0.082	91.8
12-3a-A1	12-3a-A1-10	1	CIP	0.125	5	12	3a	A1	10	slow-regular	18	1	E11	0.182	0.938	6.2
12-3a-A1	12-3a-A1-10	1	DOR	0.25	12.5	12	3a	A1	10	slow-regular	38	1	B11	0.195	0.837	16.3
12-3a-A1	12-3a-A1-10	1	CIP	0.5	20	12	3a	A1	10	slow-regular	18	1	G11	0.166	0.856	14.4
12-3a-A1	12-3a-A1-10	1	DOR	1	50	12	3a	A1	10	slow-regular	38	1	D11	0.043	0.185	81.5
12-3a-A1	12-3a-A1-10	1	CIP	1	40	12	3a	A1	10	slow-regular	18	1	D11	0.083	0.428	57.2
12-3a-A1	12-3a-A1-10	1	GEN	0.25	170	12	3a	A1	10	slow-regular	18	1	B11	0.184	0.79	21
12-3a-A1	12-3a-A1-10	1	CAR	8	560	12	3a	A1	10	slow-regular	18	1	A11	0.016	0.067	93.3
12-3a-A1	12-3a-A1-10	1	DOR	4	200	12	3a	A1	10	slow-regular	38	1	H11	0.004	0.017	98.3
12-3a-A1	12-3a-A1-10	1	DOR	0.125	6.25	12	3a	A1	10	slow-regular	38	1	E11	0.196	0.841	15.9
12-3a-A1	12-3a-A1-10	1	CAR	4	280	12	3a	A1	10	slow-regular	18	1	H11	0.033	0.137	86.3
12-3a-A1	12-3a-A1-10	1	CAR	0.125	8.75	12	3a	A1	10	slow-regular	18	1	E11	0.182	0.758	24.2
12-3a-A1	12-3a-A1-10	1	GEN	4	2720	12	3a	A1	10	slow-regular	18	1	H11	0.002	0.009	99.1
12-3a-A1	12-3a-A1-10	1	CEF	0.25	0.15	12	3a	A1	10	slow-regular	18	1	B11	0.15	0.794	20.6
12-3a-A1	12-3a-A1-10	1	CEF	2	1.2	12	3a	A1	10	slow-regular	18	1	F11	0.001	0.005	99.5
12-3a-A1	12-3a-A1-10	1	CIP	2	80	12	3a	A1	10	slow-regular	18	1	F11	0.019	0.098	90.2
12-3a-A1	12-3a-A1-10	1	CAR	2	140	12	3a	A1	10	slow-regular	18	1	F11	0.047	0.196	80.4
12-3a-A1	12-3a-A1-10	1	DOR	8	400	12	3a	A1	10	slow-regular	38	1	A11	0.001	0.004	99.6
12-3a-A1	12-3a-A1-10	1	GEN	0.125	85	12	3a	A1	10	slow-regular	18	1	E11	0.236	1.013	-1.3
12-3a-A1	12-3a-A1-10	1	CEF	8	4.8	12	3a	A1	10	slow-regular	18	1	A11	0.025	0.132	86.8
12-3a-A1	12-3a-A1-10	1	DOR	0	0	12	3a	A1	10	slow-regular	38	1	C11	0.193	0.828	17.2
12-3a-A1	12-3a-A1-10	1	CIP	0	0	12	3a	A1	10	slow-regular	18	1	C11	0.191	0.985	1.5
12-3a-A1	12-3a-A1-10	1	GEN	0	0	12	3a	A1	10	slow-regular	18	1	C11	0.185	0.794	20.6
12-3a-A1	12-3a-A1-10	1	CIP	4	160	12	3a	A1	10	slow-regular	18	1	H11	0.006	0.031	96.9
12-3a-A1	12-3a-A1-10	1	CAR	0	0	12	3a	A1	10	slow-regular	18	1	C11	0.215	0.896	10.4
12-3a-A1	12-3a-A1-11	1	CAR	2	140	12	3a	A1	10	slow-regular	18	2	F2	0.029	0.122	87.8
12-3a-A1	12-3a-A1-11	1	CIP	0	0	12	3a	A1	10	slow-regular	18	2	C2	0.221	1.005	-0.5
12-3a-A1	12-3a-A1-11	1	DOR	0.125	6.25	12	3a	A1	10	slow-regular	38	2	E2	0.188	0.734	26.6
12-3a-A1	12-3a-A1-11	1	CAR	8	560	12	3a	A1	10	slow-regular	18	2	A2	0.007	0.029	97.1
12-3a-A1	12-3a-A1-11	1	GEN	0.125	85	12	3a	A1	10	slow-regular	18	2	E2	0.222	1.018	-1.8
12-3a-A1	12-3a-A1-11	1	GEN	2	1360	12	3a	A1	10	slow-regular	18	2	F2	0.001	0.005	99.5
12-3a-A1	12-3a-A1-11	1	CEF	4	2.4	12	3a	A1	10	slow-regular	18	2	H2	0.011	0.059	94.1
12-3a-A1	12-3a-A1-11	1	CIP	0.125	5	12	3a	A1	10	slow-regular	18	2	E2	0.173	0.786	21.4
12-3a-A1	12-3a-A1-11	1	CIP	0.5	20	12	3a	A1	10	slow-regular	18	2	G2	0.14	0.636	36.4
12-3a-A1	12-3a-A1-11	1	CIP	8	320	12	3a	A1	10	slow-regular	18	2	A2	0.001	0.005	99.5
12-3a-A1	12-3a-A1-11	1	CIP	2	80	12	3a	A1	10	slow-regular	18	2	F2	0.008	0.036	96.4
12-3a-A1	12-3a-A1-11	1	CAR	0.125	8.75	12	3a	A1	10	slow-regular	18	2	E2	0.227	0.954	4.6
12-3a-A1	12-3a-A1-11	1	DOR	0.25	12.5	12	3a	A1	10	slow-regular	38	2	B2	0.263	1.027	-2.7
12-3a-A1	12-3a-A1-11	1	CEF	1	0.6	12	3a	A1	10	slow-regular	18	2	D2	0.115	0.618	38.2
12-3a-A1	12-3a-A1-11	1	DOR	4	200	12	3a	A1	10	slow-regular	38	2	H2	0.005	0.02	98
12-3a-A1	12-3a-A1-11	1	DOR	0.5	25	12	3a	A1	10	slow-regular	38	2	G2	0.17	0.664	33.6
12-3a-A1	12-3a-A1-11	1	CAR	0	0	12	3a	A1	10	slow-regular	18	2	C2	0.177	0.744	25.6
12-3a-A1	12-3a-A1-11	1	GEN	0.25	170	12	3a	A1	10	slow-regular	18	2	B2	0.177	0.812	18.8
12-3a-A1	12-3a-A1-11	1	GEN	4	2720	12	3a	A1	10	slow-regular	18	2	H2	0	0	100
12-3a-A1	12-3a-A1-11	1	CAR	0.25	17.5	12	3a	A1	10	slow-regular	18	2	B2	0.176	0.739	26.1
12-3a-A1	12-3a-A1-11	1	CAR	1	70	12	3a	A1	10	slow-regular	18	2	D2	0.146	0.613	38.7
12-3a-A1	12-3a-A1-11	1	CEF	0.125	0.075	12	3a	A1	10	slow-regular	18	2	E2	0.147	0.79	21
12-3a-A1	12-3a-A1-11	1	CEF	2	1.2	12	3a	A1	10	slow-regular	18	2	F2	0.008	0.043	95.7
12-3a-A1	12-3a-A1-11	1	CEF	0.25	0.15	12	3a	A1	10	slow-regular	18	2	B2	0.152	0.817	18.3
12-3a-A1	12-3a-A1-11	1	CEF	8	4.8	12	3a	A1	10	slow-regular	18	2	A2	0.005	0.027	97.3
12-3a-A1	12-3a-A1-11	1	CIP	1	40	12	3a	A1	10	slow-regular	18	2	D2	0.071	0.323	67.7
12-3a-A1	12-3a-A1-11	1	DOR	8	400	12	3a	A1	10	slow-regular	38	2	A2	0.007	0.027	97.3
12-3a-A1	12-3a-A1-11	1	DOR	0	0	12	3a	A1	10	slow-regular	38	2	C2	0.191	0.746	25.4
12-3a-A1	12-3a-A1-11	1	DOR	2	100	12	3a	A1	10	slow-regular	38	2	F2	0	0	100
12-3a-A1	12-3a-A1-11	1	CEF	0	0	12	3a	A1	10	slow-regular	18	2	C2	0.149	0.801	19.9
12-3a-A1	12-3a-A1-11	1	CIP	0.25	10	12	3a	A1	10	slow-regular	18	2	B2	0.193	0.877	12.3
12-3a-A1	12-3a-A1-11	1	GEN	0	0	12	3a	A1	10	slow-regular	18	2	C2	0.227	1.041	-4.1
12-3a-A1	12-3a-A1-11	1	CEF	0.5	0.3	12	3a	A1	10	slow-regular	18	2	G2	0.141	0.758	24.2
12-3a-A1	12-3a-A1-11	1	DOR	1	50	12	3a	A1	10	slow-regular	38	2	D2	0.05	0.195	80.5
12-3a-A1	12-3a-A1-11	1	GEN	8	5440	12	3a	A1	10	slow-regular	18	2	A2	0.003	0.014	98.6
12-3a-A1	12-3a-A1-11	1	CAR	4	280	12	3a	A1	10	slow-regular	18	2	H2	0.007	0.029	97.1
12-3a-A1	12-3a-A1-11	1	GEN	0.5	340	12	3a	A1	10	slow-regular	18	2	G2	0.107	0.491	50.9
12-3a-A1	12-3a-A1-11	1	CAR	0.5	35	12	3a	A1	10	slow-regular	18	2	G2	0.206	0.866	13.4
12-3a-A1	12-3a-A1-11	1	CIP	4	160	12	3a	A1	10	slow-regular	18	2	H2	0	0	100
12-3a-A1	12-3a-A1-11	1	GEN	1	680	12	3a	A1	10	slow-regular	18	2	D2	0.001	0.005	99.5
12-3a-A1	12-3a-A1-12	1	CIP	0	0	12	3a	A1	10	slow-regular	18	2	C3	0.177	0.805	19.5
12-3a-A1	12-3a-A1-12	1	CAR	0.125	8.75	12	3a	A1	10	slow-regular	18	2	E3	0.208	0.874	12.6
12-3a-A1	12-3a-A1-12	1	GEN	0.25	170	12	3a	A1	10	slow-regular	18	2	B3	0.173	0.794	20.6
12-3a-A1	12-3a-A1-12	1	CEF	8	4.8	12	3a	A1	10	slow-regular	18	2	A3	0.007	0.038	96.2
12-3a-A1	12-3a-A1-12	1	DOR	0.5	25	12	3a	A1	10	slow-regular	38	2	G3	0.123	0.48	52
12-3a-A1	12-3a-A1-12	1	CAR	4	280	12	3a	A1	10	slow-regular	18	2	H3	0.012	0.05	95
12-3a-A1	12-3a-A1-12	1	CAR	2	140	12	3a	A1	10	slow-regular	18	2	F3	0.022	0.092	90.8
12-3a-A1	12-3a-A1-12	1	CIP	1	40	12	3a	A1	10	slow-regular	18	2	D3	0.085	0.386	61.4
12-3a-A1	12-3a-A1-12	1	GEN	2	1360	12	3a	A1	10	slow-regular	18	2	F3	0	0	100
12-3a-A1	12-3a-A1-12	1	CAR	0.5	35	12	3a	A1	10	slow-regular	18	2	G3	0.164	0.689	31.1
12-3a-A1	12-3a-A1-12	1	CIP	2	80	12	3a	A1	10	slow-regular	18	2	F3	0.012	0.055	94.5
12-3a-A1	12-3a-A1-12	1	CEF	0.25	0.15	12	3a	A1	10	slow-regular	18	2	B3	0.143	0.769	23.1
12-3a-A1	12-3a-A1-12	1	CIP	0.25	10	12	3a	A1	10	slow-regular	18	2	B3	0.166	0.755	24.5
12-3a-A1	12-3a-A1-12	1	CIP	8	320	12	3a	A1	10	slow-regular	18	2	A3	0	0	100
12-3a-A1	12-3a-A1-12	1	CAR	0	0	12	3a	A1	10	slow-regular	18	2	C3	0.174	0.731	26.9
12-3a-A1	12-3a-A1-12	1	CAR	0.25	17.5	12	3a	A1	10	slow-regular	18	2	B3	0.166	0.697	30.3
12-3a-A1	12-3a-A1-12	1	DOR	1	50	12	3a	A1	10	slow-regular	38	2	D3	0.035	0.137	86.3
12-3a-A1	12-3a-A1-12	1	DOR	8	400	12	3a	A1	10	slow-regular	38	2	A3	0.009	0.035	96.5
12-3a-A1	12-3a-A1-12	1	DOR	0.25	12.5	12	3a	A1	10	slow-regular	38	2	B3	0.189	0.738	26.2
12-3a-A1	12-3a-A1-12	1	CEF	0	0	12	3a	A1	10	slow-regular	18	2	C3	0.14	0.753	24.7
12-3a-A1	12-3a-A1-12	1	GEN	1	680	12	3a	A1	10	slow-regular	18	2	D3	0.001	0.005	99.5
12-3a-A1	12-3a-A1-12	1	CEF	4	2.4	12	3a	A1	10	slow-regular	18	2	H3	0.005	0.027	97.3
12-3a-A1	12-3a-A1-12	1	CIP	0.125	5	12	3a	A1	10	slow-regular	18	2	E3	0.173	0.786	21.4
12-3a-A1	12-3a-A1-12	1	GEN	0	0	12	3a	A1	10	slow-regular	18	2	C3	0.175	0.803	19.7
12-3a-A1	12-3a-A1-12	1	CEF	0.5	0.3	12	3a	A1	10	slow-regular	18	2	G3	0.135	0.726	27.4
12-3a-A1	12-3a-A1-12	1	DOR	4	200	12	3a	A1	10	slow-regular	38	2	H3	0.007	0.027	97.3
12-3a-A1	12-3a-A1-12	1	CEF	2	1.2	12	3a	A1	10	slow-regular	18	2	F3	0.004	0.022	97.8
12-3a-A1	12-3a-A1-12	1	CIP	0.5	20	12	3a	A1	10	slow-regular	18	2	G3	0.152	0.691	30.9
12-3a-A1	12-3a-A1-12	1	GEN	0.125	85	12	3a	A1	10	slow-regular	18	2	E3	0.206	0.945	5.5
12-3a-A1	12-3a-A1-12	1	CEF	0.125	0.075	12	3a	A1	10	slow-regular	18	2	E3	0.142	0.763	23.7
12-3a-A1	12-3a-A1-12	1	DOR	0.125	6.25	12	3a	A1	10	slow-regular	38	2	E3	0.261	1.02	-2
12-3a-A1	12-3a-A1-12	1	CAR	1	70	12	3a	A1	10	slow-regular	18	2	D3	0.119	0.5	50
12-3a-A1	12-3a-A1-12	1	CEF	1	0.6	12	3a	A1	10	slow-regular	18	2	D3	0.076	0.409	59.1
12-3a-A1	12-3a-A1-12	1	DOR	2	100	12	3a	A1	10	slow-regular	38	2	F3	0.005	0.02	98
12-3a-A1	12-3a-A1-12	1	GEN	4	2720	12	3a	A1	10	slow-regular	18	2	H3	0.001	0.005	99.5
12-3a-A1	12-3a-A1-12	1	CAR	8	560	12	3a	A1	10	slow-regular	18	2	A3	0.015	0.063	93.7
12-3a-A1	12-3a-A1-12	1	GEN	8	5440	12	3a	A1	10	slow-regular	18	2	A3	0.001	0.005	99.5
12-3a-A1	12-3a-A1-12	1	DOR	0	0	12	3a	A1	10	slow-regular	38	2	C3	0.188	0.734	26.6
12-3a-A1	12-3a-A1-12	1	CIP	4	160	12	3a	A1	10	slow-regular	18	2	H3	0	0	100
12-3a-A1	12-3a-A1-12	1	GEN	0.5	340	12	3a	A1	10	slow-regular	18	2	G3	0.092	0.422	57.8
12-3a-A1	12-3a-A1-13	1	GEN	1	680	12	3a	A1	10	slow-regular	18	2	D4	0.004	0.018	98.2
12-3a-A1	12-3a-A1-13	1	GEN	0	0	12	3a	A1	10	slow-regular	18	2	C4	0.181	0.83	17
12-3a-A1	12-3a-A1-13	1	CEF	0	0	12	3a	A1	10	slow-regular	18	2	C4	0.15	0.806	19.4
12-3a-A1	12-3a-A1-13	1	CIP	4	160	12	3a	A1	10	slow-regular	18	2	H4	0.001	0.005	99.5
12-3a-A1	12-3a-A1-13	1	CAR	1	70	12	3a	A1	10	slow-regular	18	2	D4	0.081	0.34	66
12-3a-A1	12-3a-A1-13	1	CEF	0.125	0.075	12	3a	A1	10	slow-regular	18	2	E4	0.153	0.823	17.7
12-3a-A1	12-3a-A1-13	1	CAR	2	140	12	3a	A1	10	slow-regular	18	2	F4	0.015	0.063	93.7
12-3a-A1	12-3a-A1-13	1	CIP	0.125	5	12	3a	A1	10	slow-regular	18	2	E4	0.185	0.841	15.9
12-3a-A1	12-3a-A1-13	1	DOR	0.125	6.25	12	3a	A1	10	slow-regular	38	2	E4	0.26	1.016	-1.6
12-3a-A1	12-3a-A1-13	1	CEF	2	1.2	12	3a	A1	10	slow-regular	18	2	F4	0.003	0.016	98.4
12-3a-A1	12-3a-A1-13	1	CAR	0.5	35	12	3a	A1	10	slow-regular	18	2	G4	0.172	0.723	27.7
12-3a-A1	12-3a-A1-13	1	DOR	0.5	25	12	3a	A1	10	slow-regular	38	2	G4	0.177	0.691	30.9
12-3a-A1	12-3a-A1-13	1	CAR	0	0	12	3a	A1	10	slow-regular	18	2	C4	0.179	0.752	24.8
12-3a-A1	12-3a-A1-13	1	CIP	1	40	12	3a	A1	10	slow-regular	18	2	D4	0.072	0.327	67.3
12-3a-A1	12-3a-A1-13	1	GEN	0.25	170	12	3a	A1	10	slow-regular	18	2	B4	0.181	0.83	17
12-3a-A1	12-3a-A1-13	1	GEN	8	5440	12	3a	A1	10	slow-regular	18	2	A4	0.002	0.009	99.1
12-3a-A1	12-3a-A1-13	1	DOR	1	50	12	3a	A1	10	slow-regular	38	2	D4	0.035	0.137	86.3
12-3a-A1	12-3a-A1-13	1	CIP	0.25	10	12	3a	A1	10	slow-regular	18	2	B4	0.174	0.791	20.9
12-3a-A1	12-3a-A1-13	1	GEN	0.125	85	12	3a	A1	10	slow-regular	18	2	E4	0.205	0.94	6
12-3a-A1	12-3a-A1-13	1	CIP	0.5	20	12	3a	A1	10	slow-regular	18	2	G4	0.142	0.645	35.5
12-3a-A1	12-3a-A1-13	1	CEF	1	0.6	12	3a	A1	10	slow-regular	18	2	D4	0.054	0.29	71
12-3a-A1	12-3a-A1-13	1	GEN	0.5	340	12	3a	A1	10	slow-regular	18	2	G4	0.086	0.394	60.6
12-3a-A1	12-3a-A1-13	1	DOR	2	100	12	3a	A1	10	slow-regular	38	2	F4	0.006	0.023	97.7
12-3a-A1	12-3a-A1-13	1	CEF	4	2.4	12	3a	A1	10	slow-regular	18	2	H4	0.005	0.027	97.3
12-3a-A1	12-3a-A1-13	1	DOR	0.25	12.5	12	3a	A1	10	slow-regular	38	2	B4	0.186	0.727	27.3
12-3a-A1	12-3a-A1-13	1	CAR	8	560	12	3a	A1	10	slow-regular	18	2	A4	0.011	0.046	95.4
12-3a-A1	12-3a-A1-13	1	CAR	0.125	8.75	12	3a	A1	10	slow-regular	18	2	E4	0.176	0.739	26.1
12-3a-A1	12-3a-A1-13	1	CEF	0.25	0.15	12	3a	A1	10	slow-regular	18	2	B4	0.149	0.801	19.9
12-3a-A1	12-3a-A1-13	1	GEN	4	2720	12	3a	A1	10	slow-regular	18	2	H4	0.003	0.014	98.6
12-3a-A1	12-3a-A1-13	1	GEN	2	1360	12	3a	A1	10	slow-regular	18	2	F4	0.002	0.009	99.1
12-3a-A1	12-3a-A1-13	1	DOR	4	200	12	3a	A1	10	slow-regular	38	2	H4	0.008	0.031	96.9
12-3a-A1	12-3a-A1-13	1	CAR	0.25	17.5	12	3a	A1	10	slow-regular	18	2	B4	0.176	0.739	26.1
12-3a-A1	12-3a-A1-13	1	CAR	4	280	12	3a	A1	10	slow-regular	18	2	H4	0.01	0.042	95.8
12-3a-A1	12-3a-A1-13	1	CIP	2	80	12	3a	A1	10	slow-regular	18	2	F4	0.02	0.091	90.9
12-3a-A1	12-3a-A1-13	1	DOR	8	400	12	3a	A1	10	slow-regular	38	2	A4	0.009	0.035	96.5
12-3a-A1	12-3a-A1-13	1	DOR	0	0	12	3a	A1	10	slow-regular	38	2	C4	0.254	0.992	0.8
12-3a-A1	12-3a-A1-13	1	CEF	8	4.8	12	3a	A1	10	slow-regular	18	2	A4	0.003	0.016	98.4
12-3a-A1	12-3a-A1-13	1	CIP	0	0	12	3a	A1	10	slow-regular	18	2	C4	0.184	0.836	16.4
12-3a-A1	12-3a-A1-13	1	CIP	8	320	12	3a	A1	10	slow-regular	18	2	A4	0	0	100
12-3a-A1	12-3a-A1-13	1	CEF	0.5	0.3	12	3a	A1	10	slow-regular	18	2	G4	0.149	0.801	19.9
12-3a-A1	12-3a-A1-14	1	GEN	0.25	170	12	3a	A1	10	slow-regular	18	2	B5	0.18	0.826	17.4
12-3a-A1	12-3a-A1-14	1	DOR	0.5	25	12	3a	A1	10	slow-regular	38	2	G5	0.156	0.609	39.1
12-3a-A1	12-3a-A1-14	1	DOR	1	50	12	3a	A1	10	slow-regular	38	2	D5	0.067	0.262	73.8
12-3a-A1	12-3a-A1-14	1	CIP	1	40	12	3a	A1	10	slow-regular	18	2	D5	0.07	0.318	68.2
12-3a-A1	12-3a-A1-14	1	CIP	8	320	12	3a	A1	10	slow-regular	18	2	A5	0.002	0.009	99.1
12-3a-A1	12-3a-A1-14	1	CAR	1	70	12	3a	A1	10	slow-regular	18	2	D5	0.155	0.651	34.9
12-3a-A1	12-3a-A1-14	1	GEN	2	1360	12	3a	A1	10	slow-regular	18	2	F5	0.001	0.005	99.5
12-3a-A1	12-3a-A1-14	1	DOR	0.125	6.25	12	3a	A1	10	slow-regular	38	2	E5	0.19	0.742	25.8
12-3a-A1	12-3a-A1-14	1	CIP	2	80	12	3a	A1	10	slow-regular	18	2	F5	0.004	0.018	98.2
12-3a-A1	12-3a-A1-14	1	DOR	0	0	12	3a	A1	10	slow-regular	38	2	C5	0.191	0.746	25.4
12-3a-A1	12-3a-A1-14	1	CEF	4	2.4	12	3a	A1	10	slow-regular	18	2	H5	0.004	0.022	97.8
12-3a-A1	12-3a-A1-14	1	DOR	8	400	12	3a	A1	10	slow-regular	38	2	A5	0.007	0.027	97.3
12-3a-A1	12-3a-A1-14	1	CAR	0.25	17.5	12	3a	A1	10	slow-regular	18	2	B5	0.175	0.735	26.5
12-3a-A1	12-3a-A1-14	1	CAR	0	0	12	3a	A1	10	slow-regular	18	2	C5	0.184	0.773	22.7
12-3a-A1	12-3a-A1-14	1	CAR	0.5	35	12	3a	A1	10	slow-regular	18	2	G5	0.179	0.752	24.8
12-3a-A1	12-3a-A1-14	1	DOR	4	200	12	3a	A1	10	slow-regular	38	2	H5	0.005	0.02	98
12-3a-A1	12-3a-A1-14	1	CEF	0.125	0.075	12	3a	A1	10	slow-regular	18	2	E5	0.153	0.823	17.7
12-3a-A1	12-3a-A1-14	1	GEN	4	2720	12	3a	A1	10	slow-regular	18	2	H5	0.001	0.005	99.5
12-3a-A1	12-3a-A1-14	1	CEF	2	1.2	12	3a	A1	10	slow-regular	18	2	F5	0.018	0.097	90.3
12-3a-A1	12-3a-A1-14	1	GEN	0.125	85	12	3a	A1	10	slow-regular	18	2	E5	0.199	0.913	8.7
12-3a-A1	12-3a-A1-14	1	CEF	8	4.8	12	3a	A1	10	slow-regular	18	2	A5	0.006	0.032	96.8
12-3a-A1	12-3a-A1-14	1	CAR	0.125	8.75	12	3a	A1	10	slow-regular	18	2	E5	0.178	0.748	25.2
12-3a-A1	12-3a-A1-14	1	CAR	2	140	12	3a	A1	10	slow-regular	18	2	F5	0.041	0.172	82.8
12-3a-A1	12-3a-A1-14	1	GEN	8	5440	12	3a	A1	10	slow-regular	18	2	A5	0	0	100
12-3a-A1	12-3a-A1-14	1	CIP	0.5	20	12	3a	A1	10	slow-regular	18	2	G5	0.145	0.659	34.1
12-3a-A1	12-3a-A1-14	1	GEN	0.5	340	12	3a	A1	10	slow-regular	18	2	G5	0.121	0.555	44.5
12-3a-A1	12-3a-A1-14	1	CAR	8	560	12	3a	A1	10	slow-regular	18	2	A5	0.009	0.038	96.2
12-3a-A1	12-3a-A1-14	1	CIP	4	160	12	3a	A1	10	slow-regular	18	2	H5	0	0	100
12-3a-A1	12-3a-A1-14	1	GEN	1	680	12	3a	A1	10	slow-regular	18	2	D5	0.001	0.005	99.5
12-3a-A1	12-3a-A1-14	1	GEN	0	0	12	3a	A1	10	slow-regular	18	2	C5	0.19	0.872	12.8
12-3a-A1	12-3a-A1-14	1	CEF	1	0.6	12	3a	A1	10	slow-regular	18	2	D5	0.144	0.774	22.6
12-3a-A1	12-3a-A1-14	1	DOR	2	100	12	3a	A1	10	slow-regular	38	2	F5	0.003	0.012	98.8
12-3a-A1	12-3a-A1-14	1	CEF	0.25	0.15	12	3a	A1	10	slow-regular	18	2	B5	0.164	0.882	11.8
12-3a-A1	12-3a-A1-14	1	CIP	0.125	5	12	3a	A1	10	slow-regular	18	2	E5	0.175	0.795	20.5
12-3a-A1	12-3a-A1-14	1	CAR	4	280	12	3a	A1	10	slow-regular	18	2	H5	0.01	0.042	95.8
12-3a-A1	12-3a-A1-14	1	DOR	0.25	12.5	12	3a	A1	10	slow-regular	38	2	B5	0.263	1.027	-2.7
12-3a-A1	12-3a-A1-14	1	CIP	0.25	10	12	3a	A1	10	slow-regular	18	2	B5	0.169	0.768	23.2
12-3a-A1	12-3a-A1-14	1	CIP	0	0	12	3a	A1	10	slow-regular	18	2	C5	0.182	0.827	17.3
12-3a-A1	12-3a-A1-14	1	CEF	0.5	0.3	12	3a	A1	10	slow-regular	18	2	G5	0.15	0.806	19.4
12-3a-A1	12-3a-A1-14	1	CEF	0	0	12	3a	A1	10	slow-regular	18	2	C5	0.152	0.817	18.3
12-3a-A1	12-3a-A1-15	1	GEN	0.5	340	12	3a	A1	10	slow-regular	18	2	G6	0.128	0.587	41.3
12-3a-A1	12-3a-A1-15	1	GEN	4	2720	12	3a	A1	10	slow-regular	18	2	H6	0.001	0.005	99.5
12-3a-A1	12-3a-A1-15	1	CEF	0.125	0.075	12	3a	A1	10	slow-regular	18	2	E6	0.151	0.812	18.8
12-3a-A1	12-3a-A1-15	1	CAR	2	140	12	3a	A1	10	slow-regular	18	2	F6	0.044	0.185	81.5
12-3a-A1	12-3a-A1-15	1	CAR	1	70	12	3a	A1	10	slow-regular	18	2	D6	0.159	0.668	33.2
12-3a-A1	12-3a-A1-15	1	CIP	4	160	12	3a	A1	10	slow-regular	18	2	H6	0.001	0.005	99.5
12-3a-A1	12-3a-A1-15	1	CIP	2	80	12	3a	A1	10	slow-regular	18	2	F6	0.005	0.023	97.7
12-3a-A1	12-3a-A1-15	1	DOR	0.125	6.25	12	3a	A1	10	slow-regular	38	2	E6	0.188	0.734	26.6
12-3a-A1	12-3a-A1-15	1	GEN	2	1360	12	3a	A1	10	slow-regular	18	2	F6	0.001	0.005	99.5
12-3a-A1	12-3a-A1-15	1	CAR	0	0	12	3a	A1	10	slow-regular	18	2	C6	0.19	0.798	20.2
12-3a-A1	12-3a-A1-15	1	CIP	8	320	12	3a	A1	10	slow-regular	18	2	A6	0.001	0.005	99.5
12-3a-A1	12-3a-A1-15	1	DOR	0.5	25	12	3a	A1	10	slow-regular	38	2	G6	0.166	0.648	35.2
12-3a-A1	12-3a-A1-15	1	CIP	0.25	10	12	3a	A1	10	slow-regular	18	2	B6	0.201	0.914	8.6
12-3a-A1	12-3a-A1-15	1	CIP	0.125	5	12	3a	A1	10	slow-regular	18	2	E6	0.217	0.986	1.4
12-3a-A1	12-3a-A1-15	1	DOR	1	50	12	3a	A1	10	slow-regular	38	2	D6	0.044	0.172	82.8
12-3a-A1	12-3a-A1-15	1	CEF	4	2.4	12	3a	A1	10	slow-regular	18	2	H6	0.017	0.091	90.9
12-3a-A1	12-3a-A1-15	1	CAR	0.25	17.5	12	3a	A1	10	slow-regular	18	2	B6	0.177	0.744	25.6
12-3a-A1	12-3a-A1-15	1	CAR	0.5	35	12	3a	A1	10	slow-regular	18	2	G6	0.172	0.723	27.7
12-3a-A1	12-3a-A1-15	1	GEN	0	0	12	3a	A1	10	slow-regular	18	2	C6	0.225	1.032	-3.2
12-3a-A1	12-3a-A1-15	1	CIP	1	40	12	3a	A1	10	slow-regular	18	2	D6	0.072	0.327	67.3
12-3a-A1	12-3a-A1-15	1	CIP	0	0	12	3a	A1	10	slow-regular	18	2	C6	0.185	0.841	15.9
12-3a-A1	12-3a-A1-15	1	CEF	0.25	0.15	12	3a	A1	10	slow-regular	18	2	B6	0.191	1.027	-2.7
12-3a-A1	12-3a-A1-15	1	CAR	4	280	12	3a	A1	10	slow-regular	18	2	H6	0.008	0.034	96.6
12-3a-A1	12-3a-A1-15	1	DOR	4	200	12	3a	A1	10	slow-regular	38	2	H6	0.002	0.008	99.2
12-3a-A1	12-3a-A1-15	1	CAR	0.125	8.75	12	3a	A1	10	slow-regular	18	2	E6	0.228	0.958	4.2
12-3a-A1	12-3a-A1-15	1	DOR	0	0	12	3a	A1	10	slow-regular	38	2	C6	0.248	0.969	3.1
12-3a-A1	12-3a-A1-15	1	CEF	1	0.6	12	3a	A1	10	slow-regular	18	2	D6	0.136	0.731	26.9
12-3a-A1	12-3a-A1-15	1	DOR	2	100	12	3a	A1	10	slow-regular	38	2	F6	0.003	0.012	98.8
12-3a-A1	12-3a-A1-15	1	CEF	8	4.8	12	3a	A1	10	slow-regular	18	2	A6	0.006	0.032	96.8
12-3a-A1	12-3a-A1-15	1	CAR	8	560	12	3a	A1	10	slow-regular	18	2	A6	0.011	0.046	95.4
12-3a-A1	12-3a-A1-15	1	CEF	0.5	0.3	12	3a	A1	10	slow-regular	18	2	G6	0.161	0.866	13.4
12-3a-A1	12-3a-A1-15	1	CEF	0	0	12	3a	A1	10	slow-regular	18	2	C6	0.207	1.113	-11.3
12-3a-A1	12-3a-A1-15	1	GEN	8	5440	12	3a	A1	10	slow-regular	18	2	A6	0	0	100
12-3a-A1	12-3a-A1-15	1	DOR	0.25	12.5	12	3a	A1	10	slow-regular	38	2	B6	0.188	0.734	26.6
12-3a-A1	12-3a-A1-15	1	GEN	1	680	12	3a	A1	10	slow-regular	18	2	D6	0.005	0.023	97.7
12-3a-A1	12-3a-A1-15	1	CEF	2	1.2	12	3a	A1	10	slow-regular	18	2	F6	0.016	0.086	91.4
12-3a-A1	12-3a-A1-15	1	DOR	8	400	12	3a	A1	10	slow-regular	38	2	A6	0.007	0.027	97.3
12-3a-A1	12-3a-A1-15	1	GEN	0.125	85	12	3a	A1	10	slow-regular	18	2	E6	0.226	1.037	-3.7
12-3a-A1	12-3a-A1-15	1	GEN	0.25	170	12	3a	A1	10	slow-regular	18	2	B6	0.183	0.839	16.1
12-3a-A1	12-3a-A1-15	1	CIP	0.5	20	12	3a	A1	10	slow-regular	18	2	G6	0.138	0.627	37.3
12-3a-A1	12-3a-A1-16	1	GEN	0.125	85	12	3a	A1	10	slow-regular	18	2	E7	0.188	0.862	13.8
12-3a-A1	12-3a-A1-16	1	GEN	1	680	12	3a	A1	10	slow-regular	18	2	D7	0.003	0.014	98.6
12-3a-A1	12-3a-A1-16	1	DOR	8	400	12	3a	A1	10	slow-regular	38	2	A7	0.009	0.035	96.5
12-3a-A1	12-3a-A1-16	1	DOR	0.5	25	12	3a	A1	10	slow-regular	38	2	G7	0.153	0.598	40.2
12-3a-A1	12-3a-A1-16	1	CEF	2	1.2	12	3a	A1	10	slow-regular	18	2	F7	0.014	0.075	92.5
12-3a-A1	12-3a-A1-16	1	CEF	0	0	12	3a	A1	10	slow-regular	18	2	C7	0.147	0.79	21
12-3a-A1	12-3a-A1-16	1	CEF	0.25	0.15	12	3a	A1	10	slow-regular	18	2	B7	0.141	0.758	24.2
12-3a-A1	12-3a-A1-16	1	DOR	2	100	12	3a	A1	10	slow-regular	38	2	F7	0.001	0.004	99.6
12-3a-A1	12-3a-A1-16	1	GEN	8	5440	12	3a	A1	10	slow-regular	18	2	A7	0.002	0.009	99.1
12-3a-A1	12-3a-A1-16	1	CEF	4	2.4	12	3a	A1	10	slow-regular	18	2	H7	0.009	0.048	95.2
12-3a-A1	12-3a-A1-16	1	GEN	0.5	340	12	3a	A1	10	slow-regular	18	2	G7	0.094	0.431	56.9
12-3a-A1	12-3a-A1-16	1	DOR	4	200	12	3a	A1	10	slow-regular	38	2	H7	0.035	0.137	86.3
12-3a-A1	12-3a-A1-16	1	CIP	0	0	12	3a	A1	10	slow-regular	18	2	C7	0.215	0.977	2.3
12-3a-A1	12-3a-A1-16	1	CAR	0.25	17.5	12	3a	A1	10	slow-regular	18	2	B7	0.208	0.874	12.6
12-3a-A1	12-3a-A1-16	1	CIP	0.125	5	12	3a	A1	10	slow-regular	18	2	E7	0.172	0.782	21.8
12-3a-A1	12-3a-A1-16	1	CEF	0.125	0.075	12	3a	A1	10	slow-regular	18	2	E7	0.145	0.78	22
12-3a-A1	12-3a-A1-16	1	GEN	0.25	170	12	3a	A1	10	slow-regular	18	2	B7	0.178	0.817	18.3
12-3a-A1	12-3a-A1-16	1	CEF	1	0.6	12	3a	A1	10	slow-regular	18	2	D7	0.112	0.602	39.8
12-3a-A1	12-3a-A1-16	1	CAR	1	70	12	3a	A1	10	slow-regular	18	2	D7	0.136	0.571	42.9
12-3a-A1	12-3a-A1-16	1	CIP	0.5	20	12	3a	A1	10	slow-regular	18	2	G7	0.124	0.564	43.6
12-3a-A1	12-3a-A1-16	1	CAR	2	140	12	3a	A1	10	slow-regular	18	2	F7	0.041	0.172	82.8
12-3a-A1	12-3a-A1-16	1	DOR	0.125	6.25	12	3a	A1	10	slow-regular	38	2	E7	0.19	0.742	25.8
12-3a-A1	12-3a-A1-16	1	CIP	2	80	12	3a	A1	10	slow-regular	18	2	F7	0.007	0.032	96.8
12-3a-A1	12-3a-A1-16	1	GEN	0	0	12	3a	A1	10	slow-regular	18	2	C7	0.19	0.872	12.8
12-3a-A1	12-3a-A1-16	1	DOR	0.25	12.5	12	3a	A1	10	slow-regular	38	2	B7	0.189	0.738	26.2
12-3a-A1	12-3a-A1-16	1	DOR	1	50	12	3a	A1	10	slow-regular	38	2	D7	0.05	0.195	80.5
12-3a-A1	12-3a-A1-16	1	CAR	8	560	12	3a	A1	10	slow-regular	18	2	A7	0.01	0.042	95.8
12-3a-A1	12-3a-A1-16	1	CEF	8	4.8	12	3a	A1	10	slow-regular	18	2	A7	0.001	0.005	99.5
12-3a-A1	12-3a-A1-16	1	CAR	0.125	8.75	12	3a	A1	10	slow-regular	18	2	E7	0.171	0.718	28.2
12-3a-A1	12-3a-A1-16	1	GEN	2	1360	12	3a	A1	10	slow-regular	18	2	F7	0	0	100
12-3a-A1	12-3a-A1-16	1	GEN	4	2720	12	3a	A1	10	slow-regular	18	2	H7	0.003	0.014	98.6
12-3a-A1	12-3a-A1-16	1	CIP	0.25	10	12	3a	A1	10	slow-regular	18	2	B7	0.162	0.736	26.4
12-3a-A1	12-3a-A1-16	1	CAR	0.5	35	12	3a	A1	10	slow-regular	18	2	G7	0.166	0.697	30.3
12-3a-A1	12-3a-A1-16	1	CEF	0.5	0.3	12	3a	A1	10	slow-regular	18	2	G7	0.14	0.753	24.7
12-3a-A1	12-3a-A1-16	1	CIP	8	320	12	3a	A1	10	slow-regular	18	2	A7	0	0	100
12-3a-A1	12-3a-A1-16	1	CIP	1	40	12	3a	A1	10	slow-regular	18	2	D7	0.059	0.268	73.2
12-3a-A1	12-3a-A1-16	1	CIP	4	160	12	3a	A1	10	slow-regular	18	2	H7	0.001	0.005	99.5
12-3a-A1	12-3a-A1-16	1	DOR	0	0	12	3a	A1	10	slow-regular	38	2	C7	0.202	0.789	21.1
12-3a-A1	12-3a-A1-16	1	CAR	4	280	12	3a	A1	10	slow-regular	18	2	H7	0.007	0.029	97.1
12-3a-A1	12-3a-A1-16	1	CAR	0	0	12	3a	A1	10	slow-regular	18	2	C7	0.175	0.735	26.5
12-3a-A1	12-3a-A1-17	2	CAR	2	140	12	3a	A1	10	slow-regular	44	1	F3	0.084	0.35	65
12-3a-A1	12-3a-A1-17	2	GEN	0.5	340	12	3a	A1	10	slow-regular	18	2	G8	0.159	0.729	27.1
12-3a-A1	12-3a-A1-17	2	CEF	1	0.6	12	3a	A1	10	slow-regular	18	2	D8	0.131	0.704	29.6
12-3a-A1	12-3a-A1-17	2	CEF	8	4.8	12	3a	A1	10	slow-regular	18	2	A8	0.001	0.005	99.5
12-3a-A1	12-3a-A1-17	2	DOR	4	200	12	3a	A1	10	slow-regular	38	2	H8	0.071	0.277	72.3
12-3a-A1	12-3a-A1-17	2	DOR	0.25	12.5	12	3a	A1	10	slow-regular	38	2	B8	0.222	0.867	13.3
12-3a-A1	12-3a-A1-17	2	CEF	0.25	0.15	12	3a	A1	10	slow-regular	18	2	B8	0.146	0.785	21.5
12-3a-A1	12-3a-A1-17	2	DOR	0.5	25	12	3a	A1	10	slow-regular	38	2	G8	0.132	0.516	48.4
12-3a-A1	12-3a-A1-17	2	CIP	8	320	12	3a	A1	10	slow-regular	18	2	A8	0.001	0.005	99.5
12-3a-A1	12-3a-A1-17	2	CAR	0.5	35	12	3a	A1	10	slow-regular	44	1	G3	0.173	0.721	27.9
12-3a-A1	12-3a-A1-17	2	GEN	0.125	85	12	3a	A1	10	slow-regular	18	2	E8	0.162	0.743	25.7
12-3a-A1	12-3a-A1-17	2	CIP	4	160	12	3a	A1	10	slow-regular	18	2	H8	0.007	0.032	96.8
12-3a-A1	12-3a-A1-17	2	GEN	0	0	12	3a	A1	10	slow-regular	18	2	C8	0.165	0.757	24.3
12-3a-A1	12-3a-A1-17	2	GEN	2	1360	12	3a	A1	10	slow-regular	18	2	F8	0.009	0.041	95.9
12-3a-A1	12-3a-A1-17	2	CEF	0	0	12	3a	A1	10	slow-regular	18	2	C8	0.133	0.715	28.5
12-3a-A1	12-3a-A1-17	2	DOR	0.125	6.25	12	3a	A1	10	slow-regular	38	2	E8	0.202	0.789	21.1
12-3a-A1	12-3a-A1-17	2	DOR	2	100	12	3a	A1	10	slow-regular	38	2	F8	0.162	0.633	36.7
12-3a-A1	12-3a-A1-17	2	CIP	2	80	12	3a	A1	10	slow-regular	18	2	F8	0.024	0.109	89.1
12-3a-A1	12-3a-A1-17	2	CAR	0.125	8.75	12	3a	A1	10	slow-regular	44	1	E3	0.175	0.729	27.1
12-3a-A1	12-3a-A1-17	2	GEN	1	680	12	3a	A1	10	slow-regular	18	2	D8	0.11	0.505	49.5
12-3a-A1	12-3a-A1-17	2	GEN	0.25	170	12	3a	A1	10	slow-regular	18	2	B8	0.219	1.005	-0.5
12-3a-A1	12-3a-A1-17	2	DOR	1	50	12	3a	A1	10	slow-regular	38	2	D8	0.19	0.742	25.8
12-3a-A1	12-3a-A1-17	2	CIP	0	0	12	3a	A1	10	slow-regular	18	2	C8	0.164	0.745	25.5
12-3a-A1	12-3a-A1-17	2	CEF	2	1.2	12	3a	A1	10	slow-regular	18	2	F8	0.068	0.366	63.4
12-3a-A1	12-3a-A1-17	2	CAR	0.25	17.5	12	3a	A1	10	slow-regular	44	1	B3	0.178	0.742	25.8
12-3a-A1	12-3a-A1-17	2	GEN	8	5440	12	3a	A1	10	slow-regular	18	2	A8	0.001	0.005	99.5
12-3a-A1	12-3a-A1-17	2	CEF	0.125	0.075	12	3a	A1	10	slow-regular	18	2	E8	0.138	0.742	25.8
12-3a-A1	12-3a-A1-17	2	CAR	0	0	12	3a	A1	10	slow-regular	44	1	C3	0.18	0.75	25
12-3a-A1	12-3a-A1-17	2	DOR	0	0	12	3a	A1	10	slow-regular	38	2	C8	0.215	0.84	16
12-3a-A1	12-3a-A1-17	2	GEN	4	2720	12	3a	A1	10	slow-regular	18	2	H8	0.001	0.005	99.5
12-3a-A1	12-3a-A1-17	2	DOR	8	400	12	3a	A1	10	slow-regular	38	2	A8	0.034	0.133	86.7
12-3a-A1	12-3a-A1-17	2	CIP	1	40	12	3a	A1	10	slow-regular	18	2	D8	0.083	0.377	62.3
12-3a-A1	12-3a-A1-17	2	CAR	4	280	12	3a	A1	10	slow-regular	44	1	H3	0.022	0.092	90.8
12-3a-A1	12-3a-A1-17	2	CEF	4	2.4	12	3a	A1	10	slow-regular	18	2	H8	0.01	0.054	94.6
12-3a-A1	12-3a-A1-17	2	CEF	0.5	0.3	12	3a	A1	10	slow-regular	18	2	G8	0.136	0.731	26.9
12-3a-A1	12-3a-A1-17	2	CAR	8	560	12	3a	A1	10	slow-regular	44	1	A3	0.032	0.133	86.7
12-3a-A1	12-3a-A1-17	2	CIP	0.5	20	12	3a	A1	10	slow-regular	18	2	G8	0.125	0.568	43.2
12-3a-A1	12-3a-A1-17	2	CIP	0.25	10	12	3a	A1	10	slow-regular	18	2	B8	0.177	0.805	19.5
12-3a-A1	12-3a-A1-17	2	CAR	1	70	12	3a	A1	10	slow-regular	44	1	D3	0.137	0.571	42.9
12-3a-A1	12-3a-A1-17	2	CIP	0.125	5	12	3a	A1	10	slow-regular	18	2	E8	0.209	0.95	5
12-3a-A1	12-3a-A1-18	1	CEF	0.25	0.15	12	3a	A1	10	slow-regular	18	2	B9	0.192	1.032	-3.2
12-3a-A1	12-3a-A1-18	1	DOR	4	200	12	3a	A1	10	slow-regular	38	2	H9	0.003	0.012	98.8
12-3a-A1	12-3a-A1-18	1	DOR	2	100	12	3a	A1	10	slow-regular	38	2	F9	0.006	0.023	97.7
12-3a-A1	12-3a-A1-18	1	GEN	4	2720	12	3a	A1	10	slow-regular	18	2	H9	0.003	0.014	98.6
12-3a-A1	12-3a-A1-18	1	CEF	2	1.2	12	3a	A1	10	slow-regular	18	2	F9	0.007	0.038	96.2
12-3a-A1	12-3a-A1-18	1	GEN	0.5	340	12	3a	A1	10	slow-regular	18	2	G9	0.085	0.39	61
12-3a-A1	12-3a-A1-18	1	CEF	0.5	0.3	12	3a	A1	10	slow-regular	18	2	G9	0.148	0.796	20.4
12-3a-A1	12-3a-A1-18	1	CAR	4	280	12	3a	A1	10	slow-regular	18	2	H9	0.007	0.029	97.1
12-3a-A1	12-3a-A1-18	1	GEN	0.25	170	12	3a	A1	10	slow-regular	18	2	B9	0.185	0.849	15.1
12-3a-A1	12-3a-A1-18	1	DOR	0.125	6.25	12	3a	A1	10	slow-regular	38	2	E9	0.253	0.988	1.2
12-3a-A1	12-3a-A1-18	1	CIP	2	80	12	3a	A1	10	slow-regular	18	2	F9	0.006	0.027	97.3
12-3a-A1	12-3a-A1-18	1	GEN	1	680	12	3a	A1	10	slow-regular	18	2	D9	0.001	0.005	99.5
12-3a-A1	12-3a-A1-18	1	DOR	8	400	12	3a	A1	10	slow-regular	38	2	A9	0.007	0.027	97.3
12-3a-A1	12-3a-A1-18	1	CAR	2	140	12	3a	A1	10	slow-regular	18	2	F9	0.039	0.164	83.6
12-3a-A1	12-3a-A1-18	1	GEN	2	1360	12	3a	A1	10	slow-regular	18	2	F9	0.001	0.005	99.5
12-3a-A1	12-3a-A1-18	1	GEN	8	5440	12	3a	A1	10	slow-regular	18	2	A9	0.001	0.005	99.5
12-3a-A1	12-3a-A1-18	1	CEF	8	4.8	12	3a	A1	10	slow-regular	18	2	A9	0.001	0.005	99.5
12-3a-A1	12-3a-A1-18	1	CAR	1	70	12	3a	A1	10	slow-regular	18	2	D9	0.152	0.639	36.1
12-3a-A1	12-3a-A1-18	1	CAR	0.125	8.75	12	3a	A1	10	slow-regular	18	2	E9	0.229	0.962	3.8
12-3a-A1	12-3a-A1-18	1	GEN	0.125	85	12	3a	A1	10	slow-regular	18	2	E9	0.233	1.069	-6.9
12-3a-A1	12-3a-A1-18	1	CEF	0	0	12	3a	A1	10	slow-regular	18	2	C9	0.196	1.054	-5.4
12-3a-A1	12-3a-A1-18	1	GEN	0	0	12	3a	A1	10	slow-regular	18	2	C9	0.185	0.849	15.1
12-3a-A1	12-3a-A1-18	1	CIP	4	160	12	3a	A1	10	slow-regular	18	2	H9	0.001	0.005	99.5
12-3a-A1	12-3a-A1-18	1	DOR	0.25	12.5	12	3a	A1	10	slow-regular	38	2	B9	0.259	1.012	-1.2
12-3a-A1	12-3a-A1-18	1	CAR	0.25	17.5	12	3a	A1	10	slow-regular	18	2	B9	0.18	0.756	24.4
12-3a-A1	12-3a-A1-18	1	DOR	0	0	12	3a	A1	10	slow-regular	38	2	C9	0.237	0.926	7.4
12-3a-A1	12-3a-A1-18	1	CAR	0	0	12	3a	A1	10	slow-regular	18	2	C9	0.217	0.912	8.8
12-3a-A1	12-3a-A1-18	1	CAR	8	560	12	3a	A1	10	slow-regular	18	2	A9	0.009	0.038	96.2
12-3a-A1	12-3a-A1-18	1	CIP	1	40	12	3a	A1	10	slow-regular	18	2	D9	0.079	0.359	64.1
12-3a-A1	12-3a-A1-18	1	CEF	1	0.6	12	3a	A1	10	slow-regular	18	2	D9	0.136	0.731	26.9
12-3a-A1	12-3a-A1-18	1	CIP	0.5	20	12	3a	A1	10	slow-regular	18	2	G9	0.139	0.632	36.8
12-3a-A1	12-3a-A1-18	1	DOR	0.5	25	12	3a	A1	10	slow-regular	38	2	G9	0.16	0.625	37.5
12-3a-A1	12-3a-A1-18	1	CIP	8	320	12	3a	A1	10	slow-regular	18	2	A9	0.002	0.009	99.1
12-3a-A1	12-3a-A1-18	1	CIP	0	0	12	3a	A1	10	slow-regular	18	2	C9	0.22	1	0
12-3a-A1	12-3a-A1-18	1	CEF	0.125	0.075	12	3a	A1	10	slow-regular	18	2	E9	0.154	0.828	17.2
12-3a-A1	12-3a-A1-18	1	CEF	4	2.4	12	3a	A1	10	slow-regular	18	2	H9	0.008	0.043	95.7
12-3a-A1	12-3a-A1-18	1	CAR	0.5	35	12	3a	A1	10	slow-regular	18	2	G9	0.185	0.777	22.3
12-3a-A1	12-3a-A1-18	1	CIP	0.25	10	12	3a	A1	10	slow-regular	18	2	B9	0.17	0.773	22.7
12-3a-A1	12-3a-A1-18	1	CIP	0.125	5	12	3a	A1	10	slow-regular	18	2	E9	0.176	0.8	20
12-3a-A1	12-3a-A1-18	1	DOR	1	50	12	3a	A1	10	slow-regular	38	2	D9	0.055	0.215	78.5
12-3a-A1	12-3a-A1-19	1	DOR	8	400	12	3a	A1	10	slow-regular	38	2	A10	0.006	0.023	97.7
12-3a-A1	12-3a-A1-19	1	CEF	8	4.8	12	3a	A1	10	slow-regular	18	2	A10	0.002	0.011	98.9
12-3a-A1	12-3a-A1-19	1	CAR	8	560	12	3a	A1	10	slow-regular	18	2	A10	0.008	0.034	96.6
12-3a-A1	12-3a-A1-19	1	GEN	1	680	12	3a	A1	10	slow-regular	18	2	D10	0.017	0.078	92.2
12-3a-A1	12-3a-A1-19	1	CIP	0.25	10	12	3a	A1	10	slow-regular	18	2	B10	0.181	0.823	17.7
12-3a-A1	12-3a-A1-19	1	CEF	0	0	12	3a	A1	10	slow-regular	18	2	C10	0.145	0.78	22
12-3a-A1	12-3a-A1-19	1	CEF	1	0.6	12	3a	A1	10	slow-regular	18	2	D10	0.108	0.581	41.9
12-3a-A1	12-3a-A1-19	1	GEN	0.125	85	12	3a	A1	10	slow-regular	18	2	E10	0.176	0.807	19.3
12-3a-A1	12-3a-A1-19	1	DOR	4	200	12	3a	A1	10	slow-regular	38	2	H10	0.006	0.023	97.7
12-3a-A1	12-3a-A1-19	1	CEF	0.125	0.075	12	3a	A1	10	slow-regular	18	2	E10	0.181	0.973	2.7
12-3a-A1	12-3a-A1-19	1	DOR	0.25	12.5	12	3a	A1	10	slow-regular	38	2	B10	0.185	0.723	27.7
12-3a-A1	12-3a-A1-19	1	DOR	2	100	12	3a	A1	10	slow-regular	38	2	F10	0.001	0.004	99.6
12-3a-A1	12-3a-A1-19	1	CAR	1	70	12	3a	A1	10	slow-regular	18	2	D10	0.125	0.525	47.5
12-3a-A1	12-3a-A1-19	1	CEF	0.25	0.15	12	3a	A1	10	slow-regular	18	2	B10	0.142	0.763	23.7
12-3a-A1	12-3a-A1-19	1	DOR	1	50	12	3a	A1	10	slow-regular	38	2	D10	0.049	0.191	80.9
12-3a-A1	12-3a-A1-19	1	GEN	8	5440	12	3a	A1	10	slow-regular	18	2	A10	0.003	0.014	98.6
12-3a-A1	12-3a-A1-19	1	CAR	0.5	35	12	3a	A1	10	slow-regular	18	2	G10	0.189	0.794	20.6
12-3a-A1	12-3a-A1-19	1	GEN	4	2720	12	3a	A1	10	slow-regular	18	2	H10	0.001	0.005	99.5
12-3a-A1	12-3a-A1-19	1	CIP	2	80	12	3a	A1	10	slow-regular	18	2	F10	0.002	0.009	99.1
12-3a-A1	12-3a-A1-19	1	CIP	4	160	12	3a	A1	10	slow-regular	18	2	H10	0.001	0.005	99.5
12-3a-A1	12-3a-A1-19	1	CEF	0.5	0.3	12	3a	A1	10	slow-regular	18	2	G10	0.141	0.758	24.2
12-3a-A1	12-3a-A1-19	1	DOR	0	0	12	3a	A1	10	slow-regular	38	2	C10	0.184	0.719	28.1
12-3a-A1	12-3a-A1-19	1	GEN	0.25	170	12	3a	A1	10	slow-regular	18	2	B10	0.178	0.817	18.3
12-3a-A1	12-3a-A1-19	1	GEN	2	1360	12	3a	A1	10	slow-regular	18	2	F10	0.001	0.005	99.5
12-3a-A1	12-3a-A1-19	1	CAR	0.125	8.75	12	3a	A1	10	slow-regular	18	2	E10	0.208	0.874	12.6
12-3a-A1	12-3a-A1-19	1	CAR	4	280	12	3a	A1	10	slow-regular	18	2	H10	0.008	0.034	96.6
12-3a-A1	12-3a-A1-19	1	DOR	0.125	6.25	12	3a	A1	10	slow-regular	38	2	E10	0.253	0.988	1.2
12-3a-A1	12-3a-A1-19	1	CIP	0	0	12	3a	A1	10	slow-regular	18	2	C10	0.175	0.795	20.5
12-3a-A1	12-3a-A1-19	1	CEF	2	1.2	12	3a	A1	10	slow-regular	18	2	F10	0.012	0.065	93.5
12-3a-A1	12-3a-A1-19	1	CAR	2	140	12	3a	A1	10	slow-regular	18	2	F10	0.036	0.151	84.9
12-3a-A1	12-3a-A1-19	1	CAR	0.25	17.5	12	3a	A1	10	slow-regular	18	2	B10	0.168	0.706	29.4
12-3a-A1	12-3a-A1-19	1	CAR	0	0	12	3a	A1	10	slow-regular	18	2	C10	0.176	0.739	26.1
12-3a-A1	12-3a-A1-19	1	CIP	8	320	12	3a	A1	10	slow-regular	18	2	A10	0.002	0.009	99.1
12-3a-A1	12-3a-A1-19	1	GEN	0	0	12	3a	A1	10	slow-regular	18	2	C10	0.179	0.821	17.9
12-3a-A1	12-3a-A1-19	1	CIP	0.125	5	12	3a	A1	10	slow-regular	18	2	E10	0.168	0.764	23.6
12-3a-A1	12-3a-A1-19	1	CIP	1	40	12	3a	A1	10	slow-regular	18	2	D10	0.07	0.318	68.2
12-3a-A1	12-3a-A1-19	1	DOR	0.5	25	12	3a	A1	10	slow-regular	38	2	G10	0.202	0.789	21.1
12-3a-A1	12-3a-A1-19	1	CEF	4	2.4	12	3a	A1	10	slow-regular	18	2	H10	0.004	0.022	97.8
12-3a-A1	12-3a-A1-19	1	CIP	0.5	20	12	3a	A1	10	slow-regular	18	2	G10	0.125	0.568	43.2
12-3a-A1	12-3a-A1-19	1	GEN	0.5	340	12	3a	A1	10	slow-regular	18	2	G10	0.109	0.5	50
12-3a-A1	12-3a-A1-2	1	CEF	1	0.6	12	3a	A1	10	slow-regular	18	1	D3	0.076	0.402	59.8
12-3a-A1	12-3a-A1-2	1	CAR	0.5	35	12	3a	A1	10	slow-regular	18	1	G3	0.219	0.913	8.7
12-3a-A1	12-3a-A1-2	1	DOR	2	100	12	3a	A1	10	slow-regular	38	1	F3	0.008	0.034	96.6
12-3a-A1	12-3a-A1-2	1	CIP	0	0	12	3a	A1	10	slow-regular	18	1	C3	0.188	0.969	3.1
12-3a-A1	12-3a-A1-2	1	GEN	8	5440	12	3a	A1	10	slow-regular	18	1	A3	0.005	0.021	97.9
12-3a-A1	12-3a-A1-2	1	CEF	0.25	0.15	12	3a	A1	10	slow-regular	18	1	B3	0.21	1.111	-11.1
12-3a-A1	12-3a-A1-2	1	GEN	2	1360	12	3a	A1	10	slow-regular	18	1	F3	0	0	100
12-3a-A1	12-3a-A1-2	1	CIP	8	320	12	3a	A1	10	slow-regular	18	1	A3	0	0	100
12-3a-A1	12-3a-A1-2	1	CAR	0.25	17.5	12	3a	A1	10	slow-regular	18	1	B3	0.18	0.75	25
12-3a-A1	12-3a-A1-2	1	CAR	8	560	12	3a	A1	10	slow-regular	18	1	A3	0.024	0.1	90
12-3a-A1	12-3a-A1-2	1	GEN	0.125	85	12	3a	A1	10	slow-regular	18	1	E3	0.186	0.798	20.2
12-3a-A1	12-3a-A1-2	1	CEF	0.125	0.075	12	3a	A1	10	slow-regular	18	1	E3	0.157	0.831	16.9
12-3a-A1	12-3a-A1-2	1	DOR	8	400	12	3a	A1	10	slow-regular	38	1	A3	0	0	100
12-3a-A1	12-3a-A1-2	1	CEF	2	1.2	12	3a	A1	10	slow-regular	18	1	F3	0.011	0.058	94.2
12-3a-A1	12-3a-A1-2	1	CAR	1	70	12	3a	A1	10	slow-regular	18	1	D3	0.122	0.508	49.2
12-3a-A1	12-3a-A1-2	1	DOR	0.25	12.5	12	3a	A1	10	slow-regular	38	1	B3	0.197	0.845	15.5
12-3a-A1	12-3a-A1-2	1	CAR	0.125	8.75	12	3a	A1	10	slow-regular	18	1	E3	0.181	0.754	24.6
12-3a-A1	12-3a-A1-2	1	CIP	0.25	10	12	3a	A1	10	slow-regular	18	1	B3	0.178	0.918	8.2
12-3a-A1	12-3a-A1-2	1	CEF	4	2.4	12	3a	A1	10	slow-regular	18	1	H3	0.003	0.016	98.4
12-3a-A1	12-3a-A1-2	1	CIP	1	40	12	3a	A1	10	slow-regular	18	1	D3	0.101	0.521	47.9
12-3a-A1	12-3a-A1-2	1	CIP	2	80	12	3a	A1	10	slow-regular	18	1	F3	0.022	0.113	88.7
12-3a-A1	12-3a-A1-2	1	GEN	4	2720	12	3a	A1	10	slow-regular	18	1	H3	0	0	100
12-3a-A1	12-3a-A1-2	1	CAR	2	140	12	3a	A1	10	slow-regular	18	1	F3	0.026	0.108	89.2
12-3a-A1	12-3a-A1-2	1	CEF	0.5	0.3	12	3a	A1	10	slow-regular	18	1	G3	0.154	0.815	18.5
12-3a-A1	12-3a-A1-2	1	CEF	0	0	12	3a	A1	10	slow-regular	18	1	C3	0.22	1.164	-16.4
12-3a-A1	12-3a-A1-2	1	DOR	0	0	12	3a	A1	10	slow-regular	38	1	C3	0.195	0.837	16.3
12-3a-A1	12-3a-A1-2	1	DOR	1	50	12	3a	A1	10	slow-regular	38	1	D3	0.048	0.206	79.4
12-3a-A1	12-3a-A1-2	1	GEN	0	0	12	3a	A1	10	slow-regular	18	1	C3	0.188	0.807	19.3
12-3a-A1	12-3a-A1-2	1	GEN	1	680	12	3a	A1	10	slow-regular	18	1	D3	0.002	0.009	99.1
12-3a-A1	12-3a-A1-2	1	GEN	0.5	340	12	3a	A1	10	slow-regular	18	1	G3	0.09	0.386	61.4
12-3a-A1	12-3a-A1-2	1	DOR	4	200	12	3a	A1	10	slow-regular	38	1	H3	0.002	0.009	99.1
12-3a-A1	12-3a-A1-2	1	CIP	0.5	20	12	3a	A1	10	slow-regular	18	1	G3	0.177	0.912	8.8
12-3a-A1	12-3a-A1-2	1	CIP	4	160	12	3a	A1	10	slow-regular	18	1	H3	0.001	0.005	99.5
12-3a-A1	12-3a-A1-2	1	CAR	0	0	12	3a	A1	10	slow-regular	18	1	C3	0.185	0.771	22.9
12-3a-A1	12-3a-A1-2	1	DOR	0.125	6.25	12	3a	A1	10	slow-regular	38	1	E3	0.263	1.129	-12.9
12-3a-A1	12-3a-A1-2	1	DOR	0.5	25	12	3a	A1	10	slow-regular	38	1	G3	0.139	0.597	40.3
12-3a-A1	12-3a-A1-2	1	GEN	0.25	170	12	3a	A1	10	slow-regular	18	1	B3	0.197	0.845	15.5
12-3a-A1	12-3a-A1-2	1	CEF	8	4.8	12	3a	A1	10	slow-regular	18	1	A3	0.01	0.053	94.7
12-3a-A1	12-3a-A1-2	1	CAR	4	280	12	3a	A1	10	slow-regular	18	1	H3	0.024	0.1	90
12-3a-A1	12-3a-A1-2	1	CIP	0.125	5	12	3a	A1	10	slow-regular	18	1	E3	0.184	0.948	5.2
12-3a-A1	12-3a-A1-20	1	CAR	0	0	12	3a	A1	10	slow-regular	18	2	C11	0.172	0.723	27.7
12-3a-A1	12-3a-A1-20	1	CIP	1	40	12	3a	A1	10	slow-regular	18	2	D11	0.066	0.3	70
12-3a-A1	12-3a-A1-20	1	CEF	0.125	0.075	12	3a	A1	10	slow-regular	18	2	E11	0.147	0.79	21
12-3a-A1	12-3a-A1-20	1	DOR	4	200	12	3a	A1	10	slow-regular	38	2	H11	0.006	0.023	97.7
12-3a-A1	12-3a-A1-20	1	CEF	0.25	0.15	12	3a	A1	10	slow-regular	18	2	B11	0.148	0.796	20.4
12-3a-A1	12-3a-A1-20	1	CEF	8	4.8	12	3a	A1	10	slow-regular	18	2	A11	0.002	0.011	98.9
12-3a-A1	12-3a-A1-20	1	GEN	4	2720	12	3a	A1	10	slow-regular	18	2	H11	0.001	0.005	99.5
12-3a-A1	12-3a-A1-20	1	GEN	0.5	340	12	3a	A1	10	slow-regular	18	2	G11	0.083	0.381	61.9
12-3a-A1	12-3a-A1-20	1	GEN	2	1360	12	3a	A1	10	slow-regular	18	2	F11	0.004	0.018	98.2
12-3a-A1	12-3a-A1-20	1	GEN	0.25	170	12	3a	A1	10	slow-regular	18	2	B11	0.179	0.821	17.9
12-3a-A1	12-3a-A1-20	1	DOR	0	0	12	3a	A1	10	slow-regular	38	2	C11	0.188	0.734	26.6
12-3a-A1	12-3a-A1-20	1	CEF	0.5	0.3	12	3a	A1	10	slow-regular	18	2	G11	0.144	0.774	22.6
12-3a-A1	12-3a-A1-20	1	CIP	4	160	12	3a	A1	10	slow-regular	18	2	H11	0	0	100
12-3a-A1	12-3a-A1-20	1	CAR	8	560	12	3a	A1	10	slow-regular	18	2	A11	0.004	0.017	98.3
12-3a-A1	12-3a-A1-20	1	GEN	0.125	85	12	3a	A1	10	slow-regular	18	2	E11	0.22	1.009	-0.9
12-3a-A1	12-3a-A1-20	1	CEF	1	0.6	12	3a	A1	10	slow-regular	18	2	D11	0.126	0.677	32.3
12-3a-A1	12-3a-A1-20	1	CIP	2	80	12	3a	A1	10	slow-regular	18	2	F11	0.008	0.036	96.4
12-3a-A1	12-3a-A1-20	1	DOR	1	50	12	3a	A1	10	slow-regular	38	2	D11	0.056	0.219	78.1
12-3a-A1	12-3a-A1-20	1	CAR	2	140	12	3a	A1	10	slow-regular	18	2	F11	0.043	0.181	81.9
12-3a-A1	12-3a-A1-20	1	CAR	1	70	12	3a	A1	10	slow-regular	18	2	D11	0.141	0.592	40.8
12-3a-A1	12-3a-A1-20	1	CAR	0.125	8.75	12	3a	A1	10	slow-regular	18	2	E11	0.172	0.723	27.7
12-3a-A1	12-3a-A1-20	1	CAR	0.5	35	12	3a	A1	10	slow-regular	18	2	G11	0.197	0.828	17.2
12-3a-A1	12-3a-A1-20	1	CIP	0	0	12	3a	A1	10	slow-regular	18	2	C11	0.206	0.936	6.4
12-3a-A1	12-3a-A1-20	1	CIP	0.125	5	12	3a	A1	10	slow-regular	18	2	E11	0.171	0.777	22.3
12-3a-A1	12-3a-A1-20	1	DOR	0.125	6.25	12	3a	A1	10	slow-regular	38	2	E11	0.251	0.98	2
12-3a-A1	12-3a-A1-20	1	DOR	0.25	12.5	12	3a	A1	10	slow-regular	38	2	B11	0.186	0.727	27.3
12-3a-A1	12-3a-A1-20	1	CAR	0.25	17.5	12	3a	A1	10	slow-regular	18	2	B11	0.175	0.735	26.5
12-3a-A1	12-3a-A1-20	1	GEN	8	5440	12	3a	A1	10	slow-regular	18	2	A11	0.001	0.005	99.5
12-3a-A1	12-3a-A1-20	1	DOR	8	400	12	3a	A1	10	slow-regular	38	2	A11	0.008	0.031	96.9
12-3a-A1	12-3a-A1-20	1	CIP	0.25	10	12	3a	A1	10	slow-regular	18	2	B11	0.188	0.855	14.5
12-3a-A1	12-3a-A1-20	1	CAR	4	280	12	3a	A1	10	slow-regular	18	2	H11	0.008	0.034	96.6
12-3a-A1	12-3a-A1-20	1	CEF	0	0	12	3a	A1	10	slow-regular	18	2	C11	0.188	1.011	-1.1
12-3a-A1	12-3a-A1-20	1	CIP	0.5	20	12	3a	A1	10	slow-regular	18	2	G11	0.135	0.614	38.6
12-3a-A1	12-3a-A1-20	1	DOR	0.5	25	12	3a	A1	10	slow-regular	38	2	G11	0.16	0.625	37.5
12-3a-A1	12-3a-A1-20	1	GEN	0	0	12	3a	A1	10	slow-regular	18	2	C11	0.179	0.821	17.9
12-3a-A1	12-3a-A1-20	1	CIP	8	320	12	3a	A1	10	slow-regular	18	2	A11	0	0	100
12-3a-A1	12-3a-A1-20	1	CEF	4	2.4	12	3a	A1	10	slow-regular	18	2	H11	0.007	0.038	96.2
12-3a-A1	12-3a-A1-20	1	DOR	2	100	12	3a	A1	10	slow-regular	38	2	F11	0.004	0.016	98.4
12-3a-A1	12-3a-A1-20	1	GEN	1	680	12	3a	A1	10	slow-regular	18	2	D11	0.002	0.009	99.1
12-3a-A1	12-3a-A1-20	1	CEF	2	1.2	12	3a	A1	10	slow-regular	18	2	F11	0.017	0.091	90.9
12-3a-A1	12-3a-A1-3	1	DOR	0.5	25	12	3a	A1	10	slow-regular	38	1	G4	0.217	0.931	6.9
12-3a-A1	12-3a-A1-3	1	CAR	0	0	12	3a	A1	10	slow-regular	18	1	C4	0.182	0.758	24.2
12-3a-A1	12-3a-A1-3	1	CEF	0.125	0.075	12	3a	A1	10	slow-regular	18	1	E4	0.167	0.884	11.6
12-3a-A1	12-3a-A1-3	1	CIP	0.25	10	12	3a	A1	10	slow-regular	18	1	B4	0.196	1.01	-1
12-3a-A1	12-3a-A1-3	1	CEF	1	0.6	12	3a	A1	10	slow-regular	18	1	D4	0.108	0.571	42.9
12-3a-A1	12-3a-A1-3	1	CAR	1	70	12	3a	A1	10	slow-regular	18	1	D4	0.165	0.687	31.3
12-3a-A1	12-3a-A1-3	1	CAR	0.125	8.75	12	3a	A1	10	slow-regular	18	1	E4	0.179	0.746	25.4
12-3a-A1	12-3a-A1-3	1	CAR	8	560	12	3a	A1	10	slow-regular	18	1	A4	0.019	0.079	92.1
12-3a-A1	12-3a-A1-3	1	CAR	0.5	35	12	3a	A1	10	slow-regular	18	1	G4	0.177	0.737	26.3
12-3a-A1	12-3a-A1-3	1	CEF	0.25	0.15	12	3a	A1	10	slow-regular	18	1	B4	0.166	0.878	12.2
12-3a-A1	12-3a-A1-3	1	CEF	2	1.2	12	3a	A1	10	slow-regular	18	1	F4	0.011	0.058	94.2
12-3a-A1	12-3a-A1-3	1	CIP	8	320	12	3a	A1	10	slow-regular	18	1	A4	0.002	0.01	99
12-3a-A1	12-3a-A1-3	1	GEN	2	1360	12	3a	A1	10	slow-regular	18	1	F4	0	0	100
12-3a-A1	12-3a-A1-3	1	CEF	4	2.4	12	3a	A1	10	slow-regular	18	1	H4	0.01	0.053	94.7
12-3a-A1	12-3a-A1-3	1	CAR	2	140	12	3a	A1	10	slow-regular	18	1	F4	0.031	0.129	87.1
12-3a-A1	12-3a-A1-3	1	CIP	2	80	12	3a	A1	10	slow-regular	18	1	F4	0.008	0.041	95.9
12-3a-A1	12-3a-A1-3	1	CAR	4	280	12	3a	A1	10	slow-regular	18	1	H4	0.018	0.075	92.5
12-3a-A1	12-3a-A1-3	1	CEF	0	0	12	3a	A1	10	slow-regular	18	1	C4	0.155	0.82	18
12-3a-A1	12-3a-A1-3	1	GEN	0.125	85	12	3a	A1	10	slow-regular	18	1	E4	0.186	0.798	20.2
12-3a-A1	12-3a-A1-3	1	GEN	8	5440	12	3a	A1	10	slow-regular	18	1	A4	0.001	0.004	99.6
12-3a-A1	12-3a-A1-3	1	GEN	0.5	340	12	3a	A1	10	slow-regular	18	1	G4	0.104	0.446	55.4
12-3a-A1	12-3a-A1-3	1	GEN	0	0	12	3a	A1	10	slow-regular	18	1	C4	0.186	0.798	20.2
12-3a-A1	12-3a-A1-3	1	DOR	2	100	12	3a	A1	10	slow-regular	38	1	F4	0.016	0.069	93.1
12-3a-A1	12-3a-A1-3	1	CAR	0.25	17.5	12	3a	A1	10	slow-regular	18	1	B4	0.178	0.742	25.8
12-3a-A1	12-3a-A1-3	1	CEF	8	4.8	12	3a	A1	10	slow-regular	18	1	A4	0.007	0.037	96.3
12-3a-A1	12-3a-A1-3	1	DOR	1	50	12	3a	A1	10	slow-regular	38	1	D4	0.068	0.292	70.8
12-3a-A1	12-3a-A1-3	1	GEN	4	2720	12	3a	A1	10	slow-regular	18	1	H4	0	0	100
12-3a-A1	12-3a-A1-3	1	CIP	4	160	12	3a	A1	10	slow-regular	18	1	H4	0	0	100
12-3a-A1	12-3a-A1-3	1	CIP	0	0	12	3a	A1	10	slow-regular	18	1	C4	0.221	1.139	-13.9
12-3a-A1	12-3a-A1-3	1	DOR	0.25	12.5	12	3a	A1	10	slow-regular	38	1	B4	0.2	0.858	14.2
12-3a-A1	12-3a-A1-3	1	CIP	0.5	20	12	3a	A1	10	slow-regular	18	1	G4	0.144	0.742	25.8
12-3a-A1	12-3a-A1-3	1	DOR	0.125	6.25	12	3a	A1	10	slow-regular	38	1	E4	0.273	1.172	-17.2
12-3a-A1	12-3a-A1-3	1	DOR	4	200	12	3a	A1	10	slow-regular	38	1	H4	0.003	0.013	98.7
12-3a-A1	12-3a-A1-3	1	GEN	1	680	12	3a	A1	10	slow-regular	18	1	D4	0.001	0.004	99.6
12-3a-A1	12-3a-A1-3	1	DOR	8	400	12	3a	A1	10	slow-regular	38	1	A4	0.038	0.163	83.7
12-3a-A1	12-3a-A1-3	1	CIP	0.125	5	12	3a	A1	10	slow-regular	18	1	E4	0.179	0.923	7.7
12-3a-A1	12-3a-A1-3	1	GEN	0.25	170	12	3a	A1	10	slow-regular	18	1	B4	0.193	0.828	17.2
12-3a-A1	12-3a-A1-3	1	DOR	0	0	12	3a	A1	10	slow-regular	38	1	C4	0.197	0.845	15.5
12-3a-A1	12-3a-A1-3	1	CEF	0.5	0.3	12	3a	A1	10	slow-regular	18	1	G4	0.184	0.974	2.6
12-3a-A1	12-3a-A1-3	1	CIP	1	40	12	3a	A1	10	slow-regular	18	1	D4	0.077	0.397	60.3
12-3a-A1	12-3a-A1-4	1	CAR	0.125	8.75	12	3a	A1	10	slow-regular	18	1	E5	0.232	0.967	3.3
12-3a-A1	12-3a-A1-4	1	CAR	1	70	12	3a	A1	10	slow-regular	18	1	D5	0.124	0.517	48.3
12-3a-A1	12-3a-A1-4	1	GEN	0.125	85	12	3a	A1	10	slow-regular	18	1	E5	0.236	1.013	-1.3
12-3a-A1	12-3a-A1-4	1	CEF	4	2.4	12	3a	A1	10	slow-regular	18	1	H5	0.013	0.069	93.1
12-3a-A1	12-3a-A1-4	1	DOR	0	0	12	3a	A1	10	slow-regular	38	1	C5	0.197	0.845	15.5
12-3a-A1	12-3a-A1-4	1	CAR	2	140	12	3a	A1	10	slow-regular	18	1	F5	0.031	0.129	87.1
12-3a-A1	12-3a-A1-4	1	CEF	0.125	0.075	12	3a	A1	10	slow-regular	18	1	E5	0.211	1.116	-11.6
12-3a-A1	12-3a-A1-4	1	CIP	0.125	5	12	3a	A1	10	slow-regular	18	1	E5	0.179	0.923	7.7
12-3a-A1	12-3a-A1-4	1	CIP	2	80	12	3a	A1	10	slow-regular	18	1	F5	0.021	0.108	89.2
12-3a-A1	12-3a-A1-4	1	CIP	4	160	12	3a	A1	10	slow-regular	18	1	H5	0.003	0.015	98.5
12-3a-A1	12-3a-A1-4	1	CAR	8	560	12	3a	A1	10	slow-regular	18	1	A5	0.023	0.096	90.4
12-3a-A1	12-3a-A1-4	1	CIP	8	320	12	3a	A1	10	slow-regular	18	1	A5	0.002	0.01	99
12-3a-A1	12-3a-A1-4	1	DOR	0.25	12.5	12	3a	A1	10	slow-regular	38	1	B5	0.2	0.858	14.2
12-3a-A1	12-3a-A1-4	1	CEF	2	1.2	12	3a	A1	10	slow-regular	18	1	F5	0.016	0.085	91.5
12-3a-A1	12-3a-A1-4	1	CAR	0	0	12	3a	A1	10	slow-regular	18	1	C5	0.191	0.796	20.4
12-3a-A1	12-3a-A1-4	1	GEN	0.5	340	12	3a	A1	10	slow-regular	18	1	G5	0.074	0.318	68.2
12-3a-A1	12-3a-A1-4	1	GEN	8	5440	12	3a	A1	10	slow-regular	18	1	A5	0	0	100
12-3a-A1	12-3a-A1-4	1	CEF	0.5	0.3	12	3a	A1	10	slow-regular	18	1	G5	0.151	0.799	20.1
12-3a-A1	12-3a-A1-4	1	GEN	0	0	12	3a	A1	10	slow-regular	18	1	C5	0.186	0.798	20.2
12-3a-A1	12-3a-A1-4	1	CIP	1	40	12	3a	A1	10	slow-regular	18	1	D5	0.095	0.49	51
12-3a-A1	12-3a-A1-4	1	CEF	1	0.6	12	3a	A1	10	slow-regular	18	1	D5	0.073	0.386	61.4
12-3a-A1	12-3a-A1-4	1	DOR	0.5	25	12	3a	A1	10	slow-regular	38	1	G5	0.142	0.609	39.1
12-3a-A1	12-3a-A1-4	1	DOR	0.125	6.25	12	3a	A1	10	slow-regular	38	1	E5	0.201	0.863	13.7
12-3a-A1	12-3a-A1-4	1	GEN	4	2720	12	3a	A1	10	slow-regular	18	1	H5	0.002	0.009	99.1
12-3a-A1	12-3a-A1-4	1	CEF	8	4.8	12	3a	A1	10	slow-regular	18	1	A5	0.008	0.042	95.8
12-3a-A1	12-3a-A1-4	1	GEN	2	1360	12	3a	A1	10	slow-regular	18	1	F5	0	0	100
12-3a-A1	12-3a-A1-4	1	CIP	0.25	10	12	3a	A1	10	slow-regular	18	1	B5	0.177	0.912	8.8
12-3a-A1	12-3a-A1-4	1	DOR	1	50	12	3a	A1	10	slow-regular	38	1	D5	0.044	0.189	81.1
12-3a-A1	12-3a-A1-4	1	CAR	0.5	35	12	3a	A1	10	slow-regular	18	1	G5	0.176	0.733	26.7
12-3a-A1	12-3a-A1-4	1	DOR	8	400	12	3a	A1	10	slow-regular	38	1	A5	0.005	0.021	97.9
12-3a-A1	12-3a-A1-4	1	GEN	1	680	12	3a	A1	10	slow-regular	18	1	D5	0.002	0.009	99.1
12-3a-A1	12-3a-A1-4	1	GEN	0.25	170	12	3a	A1	10	slow-regular	18	1	B5	0.186	0.798	20.2
12-3a-A1	12-3a-A1-4	1	CAR	4	280	12	3a	A1	10	slow-regular	18	1	H5	0.027	0.113	88.7
12-3a-A1	12-3a-A1-4	1	CEF	0	0	12	3a	A1	10	slow-regular	18	1	C5	0.154	0.815	18.5
12-3a-A1	12-3a-A1-4	1	CIP	0.5	20	12	3a	A1	10	slow-regular	18	1	G5	0.152	0.784	21.6
12-3a-A1	12-3a-A1-4	1	CEF	0.25	0.15	12	3a	A1	10	slow-regular	18	1	B5	0.194	1.026	-2.6
12-3a-A1	12-3a-A1-4	1	CAR	0.25	17.5	12	3a	A1	10	slow-regular	18	1	B5	0.178	0.742	25.8
12-3a-A1	12-3a-A1-4	1	CIP	0	0	12	3a	A1	10	slow-regular	18	1	C5	0.245	1.263	-26.3
12-3a-A1	12-3a-A1-4	1	DOR	2	100	12	3a	A1	10	slow-regular	38	1	F5	0.005	0.021	97.9
12-3a-A1	12-3a-A1-4	1	DOR	4	200	12	3a	A1	10	slow-regular	38	1	H5	0.003	0.013	98.7
12-3a-A1	12-3a-A1-5	1	CAR	4	280	12	3a	A1	10	slow-regular	18	1	H6	0.018	0.075	92.5
12-3a-A1	12-3a-A1-5	1	CIP	0.125	5	12	3a	A1	10	slow-regular	18	1	E6	0.184	0.948	5.2
12-3a-A1	12-3a-A1-5	1	CEF	1	0.6	12	3a	A1	10	slow-regular	18	1	D6	0.137	0.725	27.5
12-3a-A1	12-3a-A1-5	1	CIP	2	80	12	3a	A1	10	slow-regular	18	1	F6	0.013	0.067	93.3
12-3a-A1	12-3a-A1-5	1	DOR	0.125	6.25	12	3a	A1	10	slow-regular	38	1	E6	0.266	1.142	-14.2
12-3a-A1	12-3a-A1-5	1	CEF	0	0	12	3a	A1	10	slow-regular	18	1	C6	0.211	1.116	-11.6
12-3a-A1	12-3a-A1-5	1	CIP	0	0	12	3a	A1	10	slow-regular	18	1	C6	0.185	0.954	4.6
12-3a-A1	12-3a-A1-5	1	DOR	0.25	12.5	12	3a	A1	10	slow-regular	38	1	B6	0.2	0.858	14.2
12-3a-A1	12-3a-A1-5	1	GEN	2	1360	12	3a	A1	10	slow-regular	18	1	F6	0	0	100
12-3a-A1	12-3a-A1-5	1	CIP	8	320	12	3a	A1	10	slow-regular	18	1	A6	0.001	0.005	99.5
12-3a-A1	12-3a-A1-5	1	CAR	8	560	12	3a	A1	10	slow-regular	18	1	A6	0.016	0.067	93.3
12-3a-A1	12-3a-A1-5	1	DOR	1	50	12	3a	A1	10	slow-regular	38	1	D6	0.067	0.288	71.2
12-3a-A1	12-3a-A1-5	1	CEF	4	2.4	12	3a	A1	10	slow-regular	18	1	H6	0.002	0.011	98.9
12-3a-A1	12-3a-A1-5	1	CAR	2	140	12	3a	A1	10	slow-regular	18	1	F6	0.037	0.154	84.6
12-3a-A1	12-3a-A1-5	1	CEF	0.125	0.075	12	3a	A1	10	slow-regular	18	1	E6	0.21	1.111	-11.1
12-3a-A1	12-3a-A1-5	1	CIP	4	160	12	3a	A1	10	slow-regular	18	1	H6	0.001	0.005	99.5
12-3a-A1	12-3a-A1-5	1	GEN	0.5	340	12	3a	A1	10	slow-regular	18	1	G6	0.088	0.378	62.2
12-3a-A1	12-3a-A1-5	1	CAR	0.25	17.5	12	3a	A1	10	slow-regular	18	1	B6	0.184	0.767	23.3
12-3a-A1	12-3a-A1-5	1	CEF	0.25	0.15	12	3a	A1	10	slow-regular	18	1	B6	0.157	0.831	16.9
12-3a-A1	12-3a-A1-5	1	CEF	0.5	0.3	12	3a	A1	10	slow-regular	18	1	G6	0.177	0.937	6.3
12-3a-A1	12-3a-A1-5	1	CIP	1	40	12	3a	A1	10	slow-regular	18	1	D6	0.081	0.418	58.2
12-3a-A1	12-3a-A1-5	1	GEN	0.25	170	12	3a	A1	10	slow-regular	18	1	B6	0.2	0.858	14.2
12-3a-A1	12-3a-A1-5	1	DOR	0.5	25	12	3a	A1	10	slow-regular	38	1	G6	0.177	0.76	24
12-3a-A1	12-3a-A1-5	1	DOR	0	0	12	3a	A1	10	slow-regular	38	1	C6	0.2	0.858	14.2
12-3a-A1	12-3a-A1-5	1	CIP	0.25	10	12	3a	A1	10	slow-regular	18	1	B6	0.18	0.928	7.2
12-3a-A1	12-3a-A1-5	1	GEN	4	2720	12	3a	A1	10	slow-regular	18	1	H6	0.001	0.004	99.6
12-3a-A1	12-3a-A1-5	1	CAR	0.5	35	12	3a	A1	10	slow-regular	18	1	G6	0.215	0.896	10.4
12-3a-A1	12-3a-A1-5	1	CIP	0.5	20	12	3a	A1	10	slow-regular	18	1	G6	0.162	0.835	16.5
12-3a-A1	12-3a-A1-5	1	DOR	8	400	12	3a	A1	10	slow-regular	38	1	A6	0.003	0.013	98.7
12-3a-A1	12-3a-A1-5	1	GEN	0.125	85	12	3a	A1	10	slow-regular	18	1	E6	0.233	1	0
12-3a-A1	12-3a-A1-5	1	GEN	8	5440	12	3a	A1	10	slow-regular	18	1	A6	0.001	0.004	99.6
12-3a-A1	12-3a-A1-5	1	CAR	1	70	12	3a	A1	10	slow-regular	18	1	D6	0.158	0.658	34.2
12-3a-A1	12-3a-A1-5	1	DOR	4	200	12	3a	A1	10	slow-regular	38	1	H6	0.004	0.017	98.3
12-3a-A1	12-3a-A1-5	1	CAR	0	0	12	3a	A1	10	slow-regular	18	1	C6	0.183	0.763	23.7
12-3a-A1	12-3a-A1-5	1	CEF	8	4.8	12	3a	A1	10	slow-regular	18	1	A6	0.009	0.048	95.2
12-3a-A1	12-3a-A1-5	1	GEN	1	680	12	3a	A1	10	slow-regular	18	1	D6	0.003	0.013	98.7
12-3a-A1	12-3a-A1-5	1	DOR	2	100	12	3a	A1	10	slow-regular	38	1	F6	0.033	0.142	85.8
12-3a-A1	12-3a-A1-5	1	CAR	0.125	8.75	12	3a	A1	10	slow-regular	18	1	E6	0.238	0.992	0.8
12-3a-A1	12-3a-A1-5	1	GEN	0	0	12	3a	A1	10	slow-regular	18	1	C6	0.187	0.803	19.7
12-3a-A1	12-3a-A1-5	1	CEF	2	1.2	12	3a	A1	10	slow-regular	18	1	F6	0.018	0.095	90.5
12-3a-A1	12-3a-A1-6	1	CIP	0	0	12	3a	A1	10	slow-regular	18	1	C7	0.196	1.01	-1
12-3a-A1	12-3a-A1-6	1	CEF	0	0	12	3a	A1	10	slow-regular	18	1	C7	0.155	0.82	18
12-3a-A1	12-3a-A1-6	1	DOR	0	0	12	3a	A1	10	slow-regular	38	1	C7	0.208	0.893	10.7
12-3a-A1	12-3a-A1-6	1	GEN	0.25	170	12	3a	A1	10	slow-regular	18	1	B7	0.209	0.897	10.3
12-3a-A1	12-3a-A1-6	1	DOR	0.25	12.5	12	3a	A1	10	slow-regular	38	1	B7	0.196	0.841	15.9
12-3a-A1	12-3a-A1-6	1	CAR	2	140	12	3a	A1	10	slow-regular	18	1	F7	0.028	0.117	88.3
12-3a-A1	12-3a-A1-6	1	GEN	2	1360	12	3a	A1	10	slow-regular	18	1	F7	0	0	100
12-3a-A1	12-3a-A1-6	1	CEF	2	1.2	12	3a	A1	10	slow-regular	18	1	F7	0.012	0.063	93.7
12-3a-A1	12-3a-A1-6	1	DOR	1	50	12	3a	A1	10	slow-regular	38	1	D7	0.065	0.279	72.1
12-3a-A1	12-3a-A1-6	1	DOR	0.5	25	12	3a	A1	10	slow-regular	38	1	G7	0.175	0.751	24.9
12-3a-A1	12-3a-A1-6	1	CEF	1	0.6	12	3a	A1	10	slow-regular	18	1	D7	0.134	0.709	29.1
12-3a-A1	12-3a-A1-6	1	CIP	4	160	12	3a	A1	10	slow-regular	18	1	H7	0.001	0.005	99.5
12-3a-A1	12-3a-A1-6	1	GEN	0.5	340	12	3a	A1	10	slow-regular	18	1	G7	0.101	0.433	56.7
12-3a-A1	12-3a-A1-6	1	DOR	2	100	12	3a	A1	10	slow-regular	38	1	F7	0.018	0.077	92.3
12-3a-A1	12-3a-A1-6	1	CIP	0.5	20	12	3a	A1	10	slow-regular	18	1	G7	0.143	0.737	26.3
12-3a-A1	12-3a-A1-6	1	CAR	8	560	12	3a	A1	10	slow-regular	18	1	A7	0.01	0.042	95.8
12-3a-A1	12-3a-A1-6	1	GEN	0	0	12	3a	A1	10	slow-regular	18	1	C7	0.179	0.768	23.2
12-3a-A1	12-3a-A1-6	1	CIP	0.25	10	12	3a	A1	10	slow-regular	18	1	B7	0.169	0.871	12.9
12-3a-A1	12-3a-A1-6	1	DOR	0.125	6.25	12	3a	A1	10	slow-regular	38	1	E7	0.201	0.863	13.7
12-3a-A1	12-3a-A1-6	1	CIP	2	80	12	3a	A1	10	slow-regular	18	1	F7	0.011	0.057	94.3
12-3a-A1	12-3a-A1-6	1	CAR	4	280	12	3a	A1	10	slow-regular	18	1	H7	0.013	0.054	94.6
12-3a-A1	12-3a-A1-6	1	CAR	0.5	35	12	3a	A1	10	slow-regular	18	1	G7	0.174	0.725	27.5
12-3a-A1	12-3a-A1-6	1	GEN	8	5440	12	3a	A1	10	slow-regular	18	1	A7	0.001	0.004	99.6
12-3a-A1	12-3a-A1-6	1	CIP	1	40	12	3a	A1	10	slow-regular	18	1	D7	0.074	0.381	61.9
12-3a-A1	12-3a-A1-6	1	CEF	0.25	0.15	12	3a	A1	10	slow-regular	18	1	B7	0.15	0.794	20.6
12-3a-A1	12-3a-A1-6	1	CEF	4	2.4	12	3a	A1	10	slow-regular	18	1	H7	0.004	0.021	97.9
12-3a-A1	12-3a-A1-6	1	CAR	0	0	12	3a	A1	10	slow-regular	18	1	C7	0.186	0.775	22.5
12-3a-A1	12-3a-A1-6	1	CEF	0.5	0.3	12	3a	A1	10	slow-regular	18	1	G7	0.16	0.847	15.3
12-3a-A1	12-3a-A1-6	1	CIP	0.125	5	12	3a	A1	10	slow-regular	18	1	E7	0.179	0.923	7.7
12-3a-A1	12-3a-A1-6	1	CEF	8	4.8	12	3a	A1	10	slow-regular	18	1	A7	0.003	0.016	98.4
12-3a-A1	12-3a-A1-6	1	CAR	0.25	17.5	12	3a	A1	10	slow-regular	18	1	B7	0.178	0.742	25.8
12-3a-A1	12-3a-A1-6	1	GEN	0.125	85	12	3a	A1	10	slow-regular	18	1	E7	0.196	0.841	15.9
12-3a-A1	12-3a-A1-6	1	CEF	0.125	0.075	12	3a	A1	10	slow-regular	18	1	E7	0.203	1.074	-7.4
12-3a-A1	12-3a-A1-6	1	GEN	4	2720	12	3a	A1	10	slow-regular	18	1	H7	0.001	0.004	99.6
12-3a-A1	12-3a-A1-6	1	CAR	1	70	12	3a	A1	10	slow-regular	18	1	D7	0.144	0.6	40
12-3a-A1	12-3a-A1-6	1	GEN	1	680	12	3a	A1	10	slow-regular	18	1	D7	0.002	0.009	99.1
12-3a-A1	12-3a-A1-6	1	DOR	8	400	12	3a	A1	10	slow-regular	38	1	A7	0.001	0.004	99.6
12-3a-A1	12-3a-A1-6	1	CIP	8	320	12	3a	A1	10	slow-regular	18	1	A7	0	0	100
12-3a-A1	12-3a-A1-6	1	CAR	0.125	8.75	12	3a	A1	10	slow-regular	18	1	E7	0.178	0.742	25.8
12-3a-A1	12-3a-A1-6	1	DOR	4	200	12	3a	A1	10	slow-regular	38	1	H7	0.003	0.013	98.7
12-3a-A1	12-3a-A1-7	1	CIP	4	160	12	3a	A1	10	slow-regular	18	1	H8	0.001	0.005	99.5
12-3a-A1	12-3a-A1-7	1	DOR	4	200	12	3a	A1	10	slow-regular	38	1	H8	0.004	0.017	98.3
12-3a-A1	12-3a-A1-7	1	CAR	0.25	17.5	12	3a	A1	10	slow-regular	18	1	B8	0.179	0.746	25.4
12-3a-A1	12-3a-A1-7	1	CIP	0.125	5	12	3a	A1	10	slow-regular	18	1	E8	0.18	0.928	7.2
12-3a-A1	12-3a-A1-7	1	CIP	8	320	12	3a	A1	10	slow-regular	18	1	A8	0.001	0.005	99.5
12-3a-A1	12-3a-A1-7	1	CAR	2	140	12	3a	A1	10	slow-regular	18	1	F8	0.034	0.142	85.8
12-3a-A1	12-3a-A1-7	1	CIP	1	40	12	3a	A1	10	slow-regular	18	1	D8	0.075	0.387	61.3
12-3a-A1	12-3a-A1-7	1	GEN	1	680	12	3a	A1	10	slow-regular	18	1	D8	0.001	0.004	99.6
12-3a-A1	12-3a-A1-7	1	CEF	0.25	0.15	12	3a	A1	10	slow-regular	18	1	B8	0.151	0.799	20.1
12-3a-A1	12-3a-A1-7	1	GEN	8	5440	12	3a	A1	10	slow-regular	18	1	A8	0.001	0.004	99.6
12-3a-A1	12-3a-A1-7	1	CIP	0.25	10	12	3a	A1	10	slow-regular	18	1	B8	0.18	0.928	7.2
12-3a-A1	12-3a-A1-7	1	GEN	0	0	12	3a	A1	10	slow-regular	18	1	C8	0.246	1.056	-5.6
12-3a-A1	12-3a-A1-7	1	CEF	0.125	0.075	12	3a	A1	10	slow-regular	18	1	E8	0.163	0.862	13.8
12-3a-A1	12-3a-A1-7	1	CAR	0.125	8.75	12	3a	A1	10	slow-regular	18	1	E8	0.182	0.758	24.2
12-3a-A1	12-3a-A1-7	1	GEN	0.125	85	12	3a	A1	10	slow-regular	18	1	E8	0.204	0.876	12.4
12-3a-A1	12-3a-A1-7	1	CEF	1	0.6	12	3a	A1	10	slow-regular	18	1	D8	0.136	0.72	28
12-3a-A1	12-3a-A1-7	1	DOR	0.25	12.5	12	3a	A1	10	slow-regular	38	1	B8	0.201	0.863	13.7
12-3a-A1	12-3a-A1-7	1	GEN	0.5	340	12	3a	A1	10	slow-regular	18	1	G8	0.093	0.399	60.1
12-3a-A1	12-3a-A1-7	1	CAR	1	70	12	3a	A1	10	slow-regular	18	1	D8	0.156	0.65	35
12-3a-A1	12-3a-A1-7	1	DOR	1	50	12	3a	A1	10	slow-regular	38	1	D8	0.077	0.33	67
12-3a-A1	12-3a-A1-7	1	CAR	0.5	35	12	3a	A1	10	slow-regular	18	1	G8	0.175	0.729	27.1
12-3a-A1	12-3a-A1-7	1	GEN	0.25	170	12	3a	A1	10	slow-regular	18	1	B8	0.183	0.785	21.5
12-3a-A1	12-3a-A1-7	1	CEF	0	0	12	3a	A1	10	slow-regular	18	1	C8	0.152	0.804	19.6
12-3a-A1	12-3a-A1-7	1	DOR	8	400	12	3a	A1	10	slow-regular	38	1	A8	0.001	0.004	99.6
12-3a-A1	12-3a-A1-7	1	DOR	2	100	12	3a	A1	10	slow-regular	38	1	F8	0.054	0.232	76.8
12-3a-A1	12-3a-A1-7	1	CAR	0	0	12	3a	A1	10	slow-regular	18	1	C8	0.228	0.95	5
12-3a-A1	12-3a-A1-7	1	DOR	0.125	6.25	12	3a	A1	10	slow-regular	38	1	E8	0.199	0.854	14.6
12-3a-A1	12-3a-A1-7	1	CIP	0.5	20	12	3a	A1	10	slow-regular	18	1	G8	0.148	0.763	23.7
12-3a-A1	12-3a-A1-7	1	DOR	0.5	25	12	3a	A1	10	slow-regular	38	1	G8	0.18	0.773	22.7
12-3a-A1	12-3a-A1-7	1	DOR	0	0	12	3a	A1	10	slow-regular	38	1	C8	0.266	1.142	-14.2
12-3a-A1	12-3a-A1-7	1	CAR	8	560	12	3a	A1	10	slow-regular	18	1	A8	0.013	0.054	94.6
12-3a-A1	12-3a-A1-7	1	CEF	4	2.4	12	3a	A1	10	slow-regular	18	1	H8	0.004	0.021	97.9
12-3a-A1	12-3a-A1-7	1	CEF	8	4.8	12	3a	A1	10	slow-regular	18	1	A8	0	0	100
12-3a-A1	12-3a-A1-7	1	CEF	0.5	0.3	12	3a	A1	10	slow-regular	18	1	G8	0.15	0.794	20.6
12-3a-A1	12-3a-A1-7	1	CIP	2	80	12	3a	A1	10	slow-regular	18	1	F8	0.012	0.062	93.8
12-3a-A1	12-3a-A1-7	1	CIP	0	0	12	3a	A1	10	slow-regular	18	1	C8	0.213	1.098	-9.8
12-3a-A1	12-3a-A1-7	1	GEN	2	1360	12	3a	A1	10	slow-regular	18	1	F8	0.001	0.004	99.6
12-3a-A1	12-3a-A1-7	1	GEN	4	2720	12	3a	A1	10	slow-regular	18	1	H8	0	0	100
12-3a-A1	12-3a-A1-7	1	CAR	4	280	12	3a	A1	10	slow-regular	18	1	H8	0.01	0.042	95.8
12-3a-A1	12-3a-A1-7	1	CEF	2	1.2	12	3a	A1	10	slow-regular	18	1	F8	0.015	0.079	92.1
12-3a-A1	12-3a-A1-8	1	CAR	1	70	12	3a	A1	10	slow-regular	18	1	D9	0.153	0.638	36.2
12-3a-A1	12-3a-A1-8	1	DOR	0.25	12.5	12	3a	A1	10	slow-regular	38	1	B9	0.258	1.107	-10.7
12-3a-A1	12-3a-A1-8	1	CEF	1	0.6	12	3a	A1	10	slow-regular	18	1	D9	0.129	0.683	31.7
12-3a-A1	12-3a-A1-8	1	CIP	0.5	20	12	3a	A1	10	slow-regular	18	1	G9	0.145	0.747	25.3
12-3a-A1	12-3a-A1-8	1	CIP	2	80	12	3a	A1	10	slow-regular	18	1	F9	0.011	0.057	94.3
12-3a-A1	12-3a-A1-8	1	CAR	0.25	17.5	12	3a	A1	10	slow-regular	18	1	B9	0.174	0.725	27.5
12-3a-A1	12-3a-A1-8	1	DOR	8	400	12	3a	A1	10	slow-regular	38	1	A9	0.003	0.013	98.7
12-3a-A1	12-3a-A1-8	1	CEF	8	4.8	12	3a	A1	10	slow-regular	18	1	A9	0.001	0.005	99.5
12-3a-A1	12-3a-A1-8	1	CIP	0	0	12	3a	A1	10	slow-regular	18	1	C9	0.178	0.918	8.2
12-3a-A1	12-3a-A1-8	1	GEN	0.125	85	12	3a	A1	10	slow-regular	18	1	E9	0.181	0.777	22.3
12-3a-A1	12-3a-A1-8	1	GEN	4	2720	12	3a	A1	10	slow-regular	18	1	H9	0	0	100
12-3a-A1	12-3a-A1-8	1	CEF	4	2.4	12	3a	A1	10	slow-regular	18	1	H9	0.005	0.026	97.4
12-3a-A1	12-3a-A1-8	1	CAR	0.5	35	12	3a	A1	10	slow-regular	18	1	G9	0.169	0.704	29.6
12-3a-A1	12-3a-A1-8	1	CAR	8	560	12	3a	A1	10	slow-regular	18	1	A9	0.012	0.05	95
12-3a-A1	12-3a-A1-8	1	CIP	1	40	12	3a	A1	10	slow-regular	18	1	D9	0.072	0.371	62.9
12-3a-A1	12-3a-A1-8	1	CAR	0	0	12	3a	A1	10	slow-regular	18	1	C9	0.208	0.867	13.3
12-3a-A1	12-3a-A1-8	1	DOR	2	100	12	3a	A1	10	slow-regular	38	1	F9	0.016	0.069	93.1
12-3a-A1	12-3a-A1-8	1	DOR	0	0	12	3a	A1	10	slow-regular	38	1	C9	0.206	0.884	11.6
12-3a-A1	12-3a-A1-8	1	CAR	4	280	12	3a	A1	10	slow-regular	18	1	H9	0.011	0.046	95.4
12-3a-A1	12-3a-A1-8	1	CEF	0.5	0.3	12	3a	A1	10	slow-regular	18	1	G9	0.146	0.772	22.8
12-3a-A1	12-3a-A1-8	1	CIP	4	160	12	3a	A1	10	slow-regular	18	1	H9	0.001	0.005	99.5
12-3a-A1	12-3a-A1-8	1	GEN	1	680	12	3a	A1	10	slow-regular	18	1	D9	0.001	0.004	99.6
12-3a-A1	12-3a-A1-8	1	GEN	8	5440	12	3a	A1	10	slow-regular	18	1	A9	0.001	0.004	99.6
12-3a-A1	12-3a-A1-8	1	GEN	0	0	12	3a	A1	10	slow-regular	18	1	C9	0.18	0.773	22.7
12-3a-A1	12-3a-A1-8	1	GEN	0.5	340	12	3a	A1	10	slow-regular	18	1	G9	0.08	0.343	65.7
12-3a-A1	12-3a-A1-8	1	GEN	0.25	170	12	3a	A1	10	slow-regular	18	1	B9	0.179	0.768	23.2
12-3a-A1	12-3a-A1-8	1	DOR	0.125	6.25	12	3a	A1	10	slow-regular	38	1	E9	0.222	0.953	4.7
12-3a-A1	12-3a-A1-8	1	CAR	0.125	8.75	12	3a	A1	10	slow-regular	18	1	E9	0.179	0.746	25.4
12-3a-A1	12-3a-A1-8	1	CEF	0.25	0.15	12	3a	A1	10	slow-regular	18	1	B9	0.147	0.778	22.2
12-3a-A1	12-3a-A1-8	1	CIP	8	320	12	3a	A1	10	slow-regular	18	1	A9	0.002	0.01	99
12-3a-A1	12-3a-A1-8	1	CEF	0	0	12	3a	A1	10	slow-regular	18	1	C9	0.19	1.005	-0.5
12-3a-A1	12-3a-A1-8	1	GEN	2	1360	12	3a	A1	10	slow-regular	18	1	F9	0.001	0.004	99.6
12-3a-A1	12-3a-A1-8	1	CEF	0.125	0.075	12	3a	A1	10	slow-regular	18	1	E9	0.165	0.873	12.7
12-3a-A1	12-3a-A1-8	1	DOR	4	200	12	3a	A1	10	slow-regular	38	1	H9	0.012	0.052	94.8
12-3a-A1	12-3a-A1-8	1	CIP	0.25	10	12	3a	A1	10	slow-regular	18	1	B9	0.164	0.845	15.5
12-3a-A1	12-3a-A1-8	1	CEF	2	1.2	12	3a	A1	10	slow-regular	18	1	F9	0.015	0.079	92.1
12-3a-A1	12-3a-A1-8	1	DOR	1	50	12	3a	A1	10	slow-regular	38	1	D9	0.076	0.326	67.4
12-3a-A1	12-3a-A1-8	1	CAR	2	140	12	3a	A1	10	slow-regular	18	1	F9	0.034	0.142	85.8
12-3a-A1	12-3a-A1-8	1	CIP	0.125	5	12	3a	A1	10	slow-regular	18	1	E9	0.172	0.887	11.3
12-3a-A1	12-3a-A1-8	1	DOR	0.5	25	12	3a	A1	10	slow-regular	38	1	G9	0.179	0.768	23.2
12-3a-A1	12-3a-A1-9	1	GEN	2	1360	12	3a	A1	10	slow-regular	18	1	F10	0.001	0.004	99.6
12-3a-A1	12-3a-A1-9	1	DOR	2	100	12	3a	A1	10	slow-regular	38	1	F10	0.007	0.03	97
12-3a-A1	12-3a-A1-9	1	GEN	1	680	12	3a	A1	10	slow-regular	18	1	D10	0.001	0.004	99.6
12-3a-A1	12-3a-A1-9	1	CAR	0.25	17.5	12	3a	A1	10	slow-regular	18	1	B10	0.179	0.746	25.4
12-3a-A1	12-3a-A1-9	1	CEF	4	2.4	12	3a	A1	10	slow-regular	18	1	H10	0.003	0.016	98.4
12-3a-A1	12-3a-A1-9	1	DOR	1	50	12	3a	A1	10	slow-regular	38	1	D10	0.044	0.189	81.1
12-3a-A1	12-3a-A1-9	1	GEN	4	2720	12	3a	A1	10	slow-regular	18	1	H10	0.001	0.004	99.6
12-3a-A1	12-3a-A1-9	1	CAR	0.5	35	12	3a	A1	10	slow-regular	18	1	G10	0.175	0.729	27.1
12-3a-A1	12-3a-A1-9	1	CIP	0.125	5	12	3a	A1	10	slow-regular	18	1	E10	0.182	0.938	6.2
12-3a-A1	12-3a-A1-9	1	CIP	8	320	12	3a	A1	10	slow-regular	18	1	A10	0.002	0.01	99
12-3a-A1	12-3a-A1-9	1	CAR	4	280	12	3a	A1	10	slow-regular	18	1	H10	0.012	0.05	95
12-3a-A1	12-3a-A1-9	1	CIP	1	40	12	3a	A1	10	slow-regular	18	1	D10	0.084	0.433	56.7
12-3a-A1	12-3a-A1-9	1	CEF	1	0.6	12	3a	A1	10	slow-regular	18	1	D10	0.048	0.254	74.6
12-3a-A1	12-3a-A1-9	1	CIP	0.5	20	12	3a	A1	10	slow-regular	18	1	G10	0.146	0.753	24.7
12-3a-A1	12-3a-A1-9	1	DOR	0.5	25	12	3a	A1	10	slow-regular	38	1	G10	0.157	0.674	32.6
12-3a-A1	12-3a-A1-9	1	GEN	0	0	12	3a	A1	10	slow-regular	18	1	C10	0.184	0.79	21
12-3a-A1	12-3a-A1-9	1	CIP	0.25	10	12	3a	A1	10	slow-regular	18	1	B10	0.204	1.052	-5.2
12-3a-A1	12-3a-A1-9	1	CEF	0.25	0.15	12	3a	A1	10	slow-regular	18	1	B10	0.15	0.794	20.6
12-3a-A1	12-3a-A1-9	1	CAR	8	560	12	3a	A1	10	slow-regular	18	1	A10	0.016	0.067	93.3
12-3a-A1	12-3a-A1-9	1	GEN	0.5	340	12	3a	A1	10	slow-regular	18	1	G10	0.06	0.258	74.2
12-3a-A1	12-3a-A1-9	1	GEN	8	5440	12	3a	A1	10	slow-regular	18	1	A10	0	0	100
12-3a-A1	12-3a-A1-9	1	CAR	2	140	12	3a	A1	10	slow-regular	18	1	F10	0.02	0.083	91.7
12-3a-A1	12-3a-A1-9	1	CEF	0	0	12	3a	A1	10	slow-regular	18	1	C10	0.154	0.815	18.5
12-3a-A1	12-3a-A1-9	1	DOR	0	0	12	3a	A1	10	slow-regular	38	1	C10	0.266	1.142	-14.2
12-3a-A1	12-3a-A1-9	1	DOR	0.125	6.25	12	3a	A1	10	slow-regular	38	1	E10	0.199	0.854	14.6
12-3a-A1	12-3a-A1-9	1	CEF	2	1.2	12	3a	A1	10	slow-regular	18	1	F10	0.005	0.026	97.4
12-3a-A1	12-3a-A1-9	1	CEF	0.5	0.3	12	3a	A1	10	slow-regular	18	1	G10	0.15	0.794	20.6
12-3a-A1	12-3a-A1-9	1	DOR	4	200	12	3a	A1	10	slow-regular	38	1	H10	0.002	0.009	99.1
12-3a-A1	12-3a-A1-9	1	CAR	1	70	12	3a	A1	10	slow-regular	18	1	D10	0.105	0.437	56.3
12-3a-A1	12-3a-A1-9	1	CIP	4	160	12	3a	A1	10	slow-regular	18	1	H10	0.001	0.005	99.5
12-3a-A1	12-3a-A1-9	1	DOR	0.25	12.5	12	3a	A1	10	slow-regular	38	1	B10	0.193	0.828	17.2
12-3a-A1	12-3a-A1-9	1	DOR	8	400	12	3a	A1	10	slow-regular	38	1	A10	0.001	0.004	99.6
12-3a-A1	12-3a-A1-9	1	GEN	0.125	85	12	3a	A1	10	slow-regular	18	1	E10	0.18	0.773	22.7
12-3a-A1	12-3a-A1-9	1	CAR	0.125	8.75	12	3a	A1	10	slow-regular	18	1	E10	0.179	0.746	25.4
12-3a-A1	12-3a-A1-9	1	CEF	8	4.8	12	3a	A1	10	slow-regular	18	1	A10	0	0	100
12-3a-A1	12-3a-A1-9	1	CAR	0	0	12	3a	A1	10	slow-regular	18	1	C10	0.197	0.821	17.9
12-3a-A1	12-3a-A1-9	1	CIP	2	80	12	3a	A1	10	slow-regular	18	1	F10	0.011	0.057	94.3
12-3a-A1	12-3a-A1-9	1	CIP	0	0	12	3a	A1	10	slow-regular	18	1	C10	0.184	0.948	5.2
12-3a-A1	12-3a-A1-9	1	CEF	0.125	0.075	12	3a	A1	10	slow-regular	18	1	E10	0.198	1.048	-4.8
12-3a-A1	12-3a-A1-9	1	GEN	0.25	170	12	3a	A1	10	slow-regular	18	1	B10	0.195	0.837	16.3
12-3a-A1	12-3a-A1-anc13	anc	DOR	0	0	12	3a	A1	10	ancestor	38	1	C1	0.262	1.124	-12.4
12-3a-A1	12-3a-A1-anc13	anc	DOR	1	50	12	3a	A1	10	ancestor	38	1	D1	0.086	0.369	63.1
12-3a-A1	12-3a-A1-anc13	anc	DOR	0.125	6.25	12	3a	A1	10	ancestor	38	1	E1	0.274	1.176	-17.6
12-3a-A1	12-3a-A1-anc13	anc	DOR	4	200	12	3a	A1	10	ancestor	38	1	H1	0.037	0.159	84.1
12-3a-A1	12-3a-A1-anc13	anc	DOR	0.5	25	12	3a	A1	10	ancestor	38	1	G1	0.089	0.382	61.8
12-3a-A1	12-3a-A1-anc13	anc	DOR	0.25	12.5	12	3a	A1	10	ancestor	38	1	B1	0.275	1.18	-18
12-3a-A1	12-3a-A1-anc13	anc	DOR	2	100	12	3a	A1	10	ancestor	38	1	F1	0.009	0.039	96.1
12-3a-A1	12-3a-A1-anc13	anc	DOR	8	400	12	3a	A1	10	ancestor	38	1	A1	0.001	0.004	99.6
12-3a-A1	12-3a-A1-anc14	anc	DOR	0.25	12.5	12	3a	A1	10	ancestor	38	1	B12	0.201	0.863	13.7
12-3a-A1	12-3a-A1-anc14	anc	DOR	0	0	12	3a	A1	10	ancestor	38	1	C12	0.204	0.876	12.4
12-3a-A1	12-3a-A1-anc14	anc	DOR	0.125	6.25	12	3a	A1	10	ancestor	38	1	E12	0.255	1.094	-9.4
12-3a-A1	12-3a-A1-anc14	anc	DOR	2	100	12	3a	A1	10	ancestor	38	1	F12	0.007	0.03	97
12-3a-A1	12-3a-A1-anc14	anc	DOR	1	50	12	3a	A1	10	ancestor	38	1	D12	0.038	0.163	83.7
12-3a-A1	12-3a-A1-anc14	anc	DOR	4	200	12	3a	A1	10	ancestor	38	1	H12	0.002	0.009	99.1
12-3a-A1	12-3a-A1-anc14	anc	DOR	8	400	12	3a	A1	10	ancestor	38	1	A12	0.001	0.004	99.6
12-3a-A1	12-3a-A1-anc14	anc	DOR	0.5	25	12	3a	A1	10	ancestor	38	1	G12	0.096	0.412	58.8
12-3a-A1	12-3a-A1-anc15	anc	DOR	2	100	12	3a	A1	10	ancestor	38	2	F1	0.003	0.012	98.8
12-3a-A1	12-3a-A1-anc15	anc	DOR	1	50	12	3a	A1	10	ancestor	38	2	D1	0.018	0.07	93
12-3a-A1	12-3a-A1-anc15	anc	DOR	4	200	12	3a	A1	10	ancestor	38	2	H1	0.005	0.02	98
12-3a-A1	12-3a-A1-anc15	anc	DOR	8	400	12	3a	A1	10	ancestor	38	2	A1	0.01	0.039	96.1
12-3a-A1	12-3a-A1-anc15	anc	DOR	0.25	12.5	12	3a	A1	10	ancestor	38	2	B1	0.268	1.047	-4.7
12-3a-A1	12-3a-A1-anc15	anc	DOR	0	0	12	3a	A1	10	ancestor	38	2	C1	0.251	0.98	2
12-3a-A1	12-3a-A1-anc15	anc	DOR	0.125	6.25	12	3a	A1	10	ancestor	38	2	E1	0.198	0.773	22.7
12-3a-A1	12-3a-A1-anc15	anc	DOR	0.5	25	12	3a	A1	10	ancestor	38	2	G1	0.094	0.367	63.3
12-3a-A1	12-3a-A1-anc16	anc	DOR	0.25	12.5	12	3a	A1	10	ancestor	38	2	B12	0.2	0.781	21.9
12-3a-A1	12-3a-A1-anc16	anc	DOR	8	400	12	3a	A1	10	ancestor	38	2	A12	0.01	0.039	96.1
12-3a-A1	12-3a-A1-anc16	anc	DOR	1	50	12	3a	A1	10	ancestor	38	2	D12	0.022	0.086	91.4
12-3a-A1	12-3a-A1-anc16	anc	DOR	2	100	12	3a	A1	10	ancestor	38	2	F12	0.004	0.016	98.4
12-3a-A1	12-3a-A1-anc16	anc	DOR	0.125	6.25	12	3a	A1	10	ancestor	38	2	E12	0.263	1.027	-2.7
12-3a-A1	12-3a-A1-anc16	anc	DOR	0.5	25	12	3a	A1	10	ancestor	38	2	G12	0.097	0.379	62.1
12-3a-A1	12-3a-A1-anc16	anc	DOR	0	0	12	3a	A1	10	ancestor	38	2	C12	0.26	1.016	-1.6
12-3a-A1	12-3a-A1-anc16	anc	DOR	4	200	12	3a	A1	10	ancestor	38	2	H12	0.006	0.023	97.7
12-3a-A1	12-3a-A1-anc37	anc	CAR	8	560	12	3a	A1	10	ancestor	18	1	A1	0	0	100
12-3a-A1	12-3a-A1-anc37	anc	CIP	0	0	12	3a	A1	10	ancestor	18	1	C1	0.192	0.99	1
12-3a-A1	12-3a-A1-anc37	anc	CEF	0.5	0.3	12	3a	A1	10	ancestor	18	1	G1	0.035	0.185	81.5
12-3a-A1	12-3a-A1-anc37	anc	CEF	0	0	12	3a	A1	10	ancestor	18	1	C1	0.165	0.873	12.7
12-3a-A1	12-3a-A1-anc37	anc	CEF	0.25	0.15	12	3a	A1	10	ancestor	18	1	B1	0.137	0.725	27.5
12-3a-A1	12-3a-A1-anc37	anc	CAR	1	70	12	3a	A1	10	ancestor	18	1	D1	0.014	0.058	94.2
12-3a-A1	12-3a-A1-anc37	anc	CIP	4	160	12	3a	A1	10	ancestor	18	1	H1	0.001	0.005	99.5
12-3a-A1	12-3a-A1-anc37	anc	GEN	0.5	340	12	3a	A1	10	ancestor	18	1	G1	0.177	0.76	24
12-3a-A1	12-3a-A1-anc37	anc	CIP	0.5	20	12	3a	A1	10	ancestor	18	1	G1	0.091	0.469	53.1
12-3a-A1	12-3a-A1-anc37	anc	GEN	4	2720	12	3a	A1	10	ancestor	18	1	H1	0.001	0.004	99.6
12-3a-A1	12-3a-A1-anc37	anc	CAR	0.25	17.5	12	3a	A1	10	ancestor	18	1	B1	0.105	0.437	56.3
12-3a-A1	12-3a-A1-anc37	anc	CIP	8	320	12	3a	A1	10	ancestor	18	1	A1	0	0	100
12-3a-A1	12-3a-A1-anc37	anc	CAR	0.5	35	12	3a	A1	10	ancestor	18	1	G1	0.032	0.133	86.7
12-3a-A1	12-3a-A1-anc37	anc	CIP	1	40	12	3a	A1	10	ancestor	18	1	D1	0.03	0.155	84.5
12-3a-A1	12-3a-A1-anc37	anc	CEF	1	0.6	12	3a	A1	10	ancestor	18	1	D1	0.009	0.048	95.2
12-3a-A1	12-3a-A1-anc37	anc	CAR	0	0	12	3a	A1	10	ancestor	18	1	C1	0.253	1.054	-5.4
12-3a-A1	12-3a-A1-anc37	anc	GEN	0	0	12	3a	A1	10	ancestor	18	1	C1	0.24	1.03	-3
12-3a-A1	12-3a-A1-anc37	anc	GEN	0.125	85	12	3a	A1	10	ancestor	18	1	E1	0.209	0.897	10.3
12-3a-A1	12-3a-A1-anc37	anc	CAR	2	140	12	3a	A1	10	ancestor	18	1	F1	0.01	0.042	95.8
12-3a-A1	12-3a-A1-anc37	anc	GEN	0.25	170	12	3a	A1	10	ancestor	18	1	B1	0.192	0.824	17.6
12-3a-A1	12-3a-A1-anc37	anc	CAR	4	280	12	3a	A1	10	ancestor	18	1	H1	0.007	0.029	97.1
12-3a-A1	12-3a-A1-anc37	anc	CEF	0.125	0.075	12	3a	A1	10	ancestor	18	1	E1	0.194	1.026	-2.6
12-3a-A1	12-3a-A1-anc37	anc	CIP	0.125	5	12	3a	A1	10	ancestor	18	1	E1	0.176	0.907	9.3
12-3a-A1	12-3a-A1-anc37	anc	CIP	0.25	10	12	3a	A1	10	ancestor	18	1	B1	0.142	0.732	26.8
12-3a-A1	12-3a-A1-anc37	anc	CAR	0.125	8.75	12	3a	A1	10	ancestor	18	1	E1	0.181	0.754	24.6
12-3a-A1	12-3a-A1-anc37	anc	CEF	4	2.4	12	3a	A1	10	ancestor	18	1	H1	0.011	0.058	94.2
12-3a-A1	12-3a-A1-anc37	anc	GEN	2	1360	12	3a	A1	10	ancestor	18	1	F1	0.001	0.004	99.6
12-3a-A1	12-3a-A1-anc37	anc	GEN	1	680	12	3a	A1	10	ancestor	18	1	D1	0.014	0.06	94
12-3a-A1	12-3a-A1-anc37	anc	CEF	8	4.8	12	3a	A1	10	ancestor	18	1	A1	0.001	0.005	99.5
12-3a-A1	12-3a-A1-anc37	anc	GEN	8	5440	12	3a	A1	10	ancestor	18	1	A1	0	0	100
12-3a-A1	12-3a-A1-anc37	anc	CIP	2	80	12	3a	A1	10	ancestor	18	1	F1	0.003	0.015	98.5
12-3a-A1	12-3a-A1-anc37	anc	CEF	2	1.2	12	3a	A1	10	ancestor	18	1	F1	0.001	0.005	99.5
12-3a-A1	12-3a-A1-anc38	anc	GEN	1	680	12	3a	A1	10	ancestor	18	1	D12	0.002	0.009	99.1
12-3a-A1	12-3a-A1-anc38	anc	CIP	0.25	10	12	3a	A1	10	ancestor	18	1	B12	0.094	0.485	51.5
12-3a-A1	12-3a-A1-anc38	anc	CEF	0.25	0.15	12	3a	A1	10	ancestor	18	1	B12	0.081	0.429	57.1
12-3a-A1	12-3a-A1-anc38	anc	CAR	2	140	12	3a	A1	10	ancestor	18	1	F12	0.012	0.05	95
12-3a-A1	12-3a-A1-anc38	anc	GEN	2	1360	12	3a	A1	10	ancestor	18	1	F12	0	0	100
12-3a-A1	12-3a-A1-anc38	anc	GEN	0	0	12	3a	A1	10	ancestor	18	1	C12	0.226	0.97	3
12-3a-A1	12-3a-A1-anc38	anc	CIP	0	0	12	3a	A1	10	ancestor	18	1	C12	0.196	1.01	-1
12-3a-A1	12-3a-A1-anc38	anc	CEF	1	0.6	12	3a	A1	10	ancestor	18	1	D12	0.009	0.048	95.2
12-3a-A1	12-3a-A1-anc38	anc	CAR	8	560	12	3a	A1	10	ancestor	18	1	A12	0.001	0.004	99.6
12-3a-A1	12-3a-A1-anc38	anc	GEN	4	2720	12	3a	A1	10	ancestor	18	1	H12	0	0	100
12-3a-A1	12-3a-A1-anc38	anc	CEF	2	1.2	12	3a	A1	10	ancestor	18	1	F12	0.001	0.005	99.5
12-3a-A1	12-3a-A1-anc38	anc	GEN	0.125	85	12	3a	A1	10	ancestor	18	1	E12	0.192	0.824	17.6
12-3a-A1	12-3a-A1-anc38	anc	CIP	1	40	12	3a	A1	10	ancestor	18	1	D12	0.032	0.165	83.5
12-3a-A1	12-3a-A1-anc38	anc	CEF	0	0	12	3a	A1	10	ancestor	18	1	C12	0.214	1.132	-13.2
12-3a-A1	12-3a-A1-anc38	anc	CAR	0.125	8.75	12	3a	A1	10	ancestor	18	1	E12	0.17	0.708	29.2
12-3a-A1	12-3a-A1-anc38	anc	CIP	0.125	5	12	3a	A1	10	ancestor	18	1	E12	0.201	1.036	-3.6
12-3a-A1	12-3a-A1-anc38	anc	CIP	8	320	12	3a	A1	10	ancestor	18	1	A12	0.001	0.005	99.5
12-3a-A1	12-3a-A1-anc38	anc	CIP	4	160	12	3a	A1	10	ancestor	18	1	H12	0.001	0.005	99.5
12-3a-A1	12-3a-A1-anc38	anc	CEF	0.5	0.3	12	3a	A1	10	ancestor	18	1	G12	0.029	0.153	84.7
12-3a-A1	12-3a-A1-anc38	anc	CAR	0.25	17.5	12	3a	A1	10	ancestor	18	1	B12	0.047	0.196	80.4
12-3a-A1	12-3a-A1-anc38	anc	GEN	0.25	170	12	3a	A1	10	ancestor	18	1	B12	0.193	0.828	17.2
12-3a-A1	12-3a-A1-anc38	anc	CEF	8	4.8	12	3a	A1	10	ancestor	18	1	A12	0	0	100
12-3a-A1	12-3a-A1-anc38	anc	GEN	0.5	340	12	3a	A1	10	ancestor	18	1	G12	0.184	0.79	21
12-3a-A1	12-3a-A1-anc38	anc	CEF	4	2.4	12	3a	A1	10	ancestor	18	1	H12	0.006	0.032	96.8
12-3a-A1	12-3a-A1-anc38	anc	CIP	0.5	20	12	3a	A1	10	ancestor	18	1	G12	0.074	0.381	61.9
12-3a-A1	12-3a-A1-anc38	anc	CAR	1	70	12	3a	A1	10	ancestor	18	1	D12	0.022	0.092	90.8
12-3a-A1	12-3a-A1-anc38	anc	CAR	4	280	12	3a	A1	10	ancestor	18	1	H12	0.006	0.025	97.5
12-3a-A1	12-3a-A1-anc38	anc	CAR	0.5	35	12	3a	A1	10	ancestor	18	1	G12	0.032	0.133	86.7
12-3a-A1	12-3a-A1-anc38	anc	CAR	0	0	12	3a	A1	10	ancestor	18	1	C12	0.227	0.946	5.4
12-3a-A1	12-3a-A1-anc38	anc	GEN	8	5440	12	3a	A1	10	ancestor	18	1	A12	0.001	0.004	99.6
12-3a-A1	12-3a-A1-anc38	anc	CEF	0.125	0.075	12	3a	A1	10	ancestor	18	1	E12	0.18	0.952	4.8
12-3a-A1	12-3a-A1-anc38	anc	CIP	2	80	12	3a	A1	10	ancestor	18	1	F12	0.004	0.021	97.9
12-3a-A1	12-3a-A1-anc39	anc	CAR	0	0	12	3a	A1	10	ancestor	18	2	C1	0.24	1.008	-0.8
12-3a-A1	12-3a-A1-anc39	anc	CAR	0.125	8.75	12	3a	A1	10	ancestor	18	2	E1	0.18	0.756	24.4
12-3a-A1	12-3a-A1-anc39	anc	GEN	8	5440	12	3a	A1	10	ancestor	18	2	A1	0	0	100
12-3a-A1	12-3a-A1-anc39	anc	CEF	0.5	0.3	12	3a	A1	10	ancestor	18	2	G1	0.032	0.172	82.8
12-3a-A1	12-3a-A1-anc39	anc	CAR	0.25	17.5	12	3a	A1	10	ancestor	18	2	B1	0.114	0.479	52.1
12-3a-A1	12-3a-A1-anc39	anc	GEN	0.125	85	12	3a	A1	10	ancestor	18	2	E1	0.248	1.138	-13.8
12-3a-A1	12-3a-A1-anc39	anc	GEN	4	2720	12	3a	A1	10	ancestor	18	2	H1	0.001	0.005	99.5
12-3a-A1	12-3a-A1-anc39	anc	GEN	1	680	12	3a	A1	10	ancestor	18	2	D1	0.003	0.014	98.6
12-3a-A1	12-3a-A1-anc39	anc	CAR	1	70	12	3a	A1	10	ancestor	18	2	D1	0.018	0.076	92.4
12-3a-A1	12-3a-A1-anc39	anc	CEF	2	1.2	12	3a	A1	10	ancestor	18	2	F1	0.003	0.016	98.4
12-3a-A1	12-3a-A1-anc39	anc	CIP	0	0	12	3a	A1	10	ancestor	18	2	C1	0.192	0.873	12.7
12-3a-A1	12-3a-A1-anc39	anc	CAR	4	280	12	3a	A1	10	ancestor	18	2	H1	0.01	0.042	95.8
12-3a-A1	12-3a-A1-anc39	anc	CEF	0	0	12	3a	A1	10	ancestor	18	2	C1	0.153	0.823	17.7
12-3a-A1	12-3a-A1-anc39	anc	CIP	4	160	12	3a	A1	10	ancestor	18	2	H1	0.001	0.005	99.5
12-3a-A1	12-3a-A1-anc39	anc	CEF	0.25	0.15	12	3a	A1	10	ancestor	18	2	B1	0.107	0.575	42.5
12-3a-A1	12-3a-A1-anc39	anc	CIP	1	40	12	3a	A1	10	ancestor	18	2	D1	0.044	0.2	80
12-3a-A1	12-3a-A1-anc39	anc	CAR	8	560	12	3a	A1	10	ancestor	18	2	A1	0.001	0.004	99.6
12-3a-A1	12-3a-A1-anc39	anc	CIP	8	320	12	3a	A1	10	ancestor	18	2	A1	0	0	100
12-3a-A1	12-3a-A1-anc39	anc	CIP	0.125	5	12	3a	A1	10	ancestor	18	2	E1	0.231	1.05	-5
12-3a-A1	12-3a-A1-anc39	anc	CEF	0.125	0.075	12	3a	A1	10	ancestor	18	2	E1	0.18	0.968	3.2
12-3a-A1	12-3a-A1-anc39	anc	CEF	8	4.8	12	3a	A1	10	ancestor	18	2	A1	0.001	0.005	99.5
12-3a-A1	12-3a-A1-anc39	anc	GEN	0.5	340	12	3a	A1	10	ancestor	18	2	G1	0.182	0.835	16.5
12-3a-A1	12-3a-A1-anc39	anc	GEN	0.25	170	12	3a	A1	10	ancestor	18	2	B1	0.189	0.867	13.3
12-3a-A1	12-3a-A1-anc39	anc	GEN	2	1360	12	3a	A1	10	ancestor	18	2	F1	0	0	100
12-3a-A1	12-3a-A1-anc39	anc	CIP	0.25	10	12	3a	A1	10	ancestor	18	2	B1	0.158	0.718	28.2
12-3a-A1	12-3a-A1-anc39	anc	CIP	2	80	12	3a	A1	10	ancestor	18	2	F1	0.006	0.027	97.3
12-3a-A1	12-3a-A1-anc39	anc	CAR	2	140	12	3a	A1	10	ancestor	18	2	F1	0.015	0.063	93.7
12-3a-A1	12-3a-A1-anc39	anc	CEF	4	2.4	12	3a	A1	10	ancestor	18	2	H1	0.007	0.038	96.2
12-3a-A1	12-3a-A1-anc39	anc	CEF	1	0.6	12	3a	A1	10	ancestor	18	2	D1	0.001	0.005	99.5
12-3a-A1	12-3a-A1-anc39	anc	GEN	0	0	12	3a	A1	10	ancestor	18	2	C1	0.192	0.881	11.9
12-3a-A1	12-3a-A1-anc39	anc	CIP	0.5	20	12	3a	A1	10	ancestor	18	2	G1	0.078	0.355	64.5
12-3a-A1	12-3a-A1-anc39	anc	CAR	0.5	35	12	3a	A1	10	ancestor	18	2	G1	0.035	0.147	85.3
12-3a-A1	12-3a-A1-anc40	anc	GEN	1	680	12	3a	A1	10	ancestor	18	2	D12	0.01	0.046	95.4
12-3a-A1	12-3a-A1-anc40	anc	GEN	0.125	85	12	3a	A1	10	ancestor	18	2	E12	0.217	0.995	0.5
12-3a-A1	12-3a-A1-anc40	anc	CIP	0	0	12	3a	A1	10	ancestor	18	2	C12	0.249	1.132	-13.2
12-3a-A1	12-3a-A1-anc40	anc	CAR	0.125	8.75	12	3a	A1	10	ancestor	18	2	E12	0.179	0.752	24.8
12-3a-A1	12-3a-A1-anc40	anc	CAR	1	70	12	3a	A1	10	ancestor	18	2	D12	0.027	0.113	88.7
12-3a-A1	12-3a-A1-anc40	anc	CAR	8	560	12	3a	A1	10	ancestor	18	2	A12	0.001	0.004	99.6
12-3a-A1	12-3a-A1-anc40	anc	GEN	2	1360	12	3a	A1	10	ancestor	18	2	F12	0.001	0.005	99.5
12-3a-A1	12-3a-A1-anc40	anc	CAR	0.5	35	12	3a	A1	10	ancestor	18	2	G12	0.033	0.139	86.1
12-3a-A1	12-3a-A1-anc40	anc	CEF	2	1.2	12	3a	A1	10	ancestor	18	2	F12	0.044	0.237	76.3
12-3a-A1	12-3a-A1-anc40	anc	CIP	2	80	12	3a	A1	10	ancestor	18	2	F12	0.003	0.014	98.6
12-3a-A1	12-3a-A1-anc40	anc	CAR	4	280	12	3a	A1	10	ancestor	18	2	H12	0.007	0.029	97.1
12-3a-A1	12-3a-A1-anc40	anc	GEN	8	5440	12	3a	A1	10	ancestor	18	2	A12	0.001	0.005	99.5
12-3a-A1	12-3a-A1-anc40	anc	CAR	0.25	17.5	12	3a	A1	10	ancestor	18	2	B12	0.116	0.487	51.3
12-3a-A1	12-3a-A1-anc40	anc	CEF	0.125	0.075	12	3a	A1	10	ancestor	18	2	E12	0.156	0.839	16.1
12-3a-A1	12-3a-A1-anc40	anc	CEF	0	0	12	3a	A1	10	ancestor	18	2	C12	0.219	1.177	-17.7
12-3a-A1	12-3a-A1-anc40	anc	CIP	4	160	12	3a	A1	10	ancestor	18	2	H12	0.005	0.023	97.7
12-3a-A1	12-3a-A1-anc40	anc	CAR	0	0	12	3a	A1	10	ancestor	18	2	C12	0.235	0.987	1.3
12-3a-A1	12-3a-A1-anc40	anc	CIP	0.125	5	12	3a	A1	10	ancestor	18	2	E12	0.22	1	0
12-3a-A1	12-3a-A1-anc40	anc	GEN	0.5	340	12	3a	A1	10	ancestor	18	2	G12	0.169	0.775	22.5
12-3a-A1	12-3a-A1-anc40	anc	CEF	4	2.4	12	3a	A1	10	ancestor	18	2	H12	0.004	0.022	97.8
12-3a-A1	12-3a-A1-anc40	anc	CIP	0.5	20	12	3a	A1	10	ancestor	18	2	G12	0.075	0.341	65.9
12-3a-A1	12-3a-A1-anc40	anc	CAR	2	140	12	3a	A1	10	ancestor	18	2	F12	0.021	0.088	91.2
12-3a-A1	12-3a-A1-anc40	anc	CIP	1	40	12	3a	A1	10	ancestor	18	2	D12	0.035	0.159	84.1
12-3a-A1	12-3a-A1-anc40	anc	CEF	0.5	0.3	12	3a	A1	10	ancestor	18	2	G12	0.045	0.242	75.8
12-3a-A1	12-3a-A1-anc40	anc	GEN	4	2720	12	3a	A1	10	ancestor	18	2	H12	0	0	100
12-3a-A1	12-3a-A1-anc40	anc	CEF	1	0.6	12	3a	A1	10	ancestor	18	2	D12	0.003	0.016	98.4
12-3a-A1	12-3a-A1-anc40	anc	CEF	0.25	0.15	12	3a	A1	10	ancestor	18	2	B12	0.08	0.43	57
12-3a-A1	12-3a-A1-anc40	anc	GEN	0.25	170	12	3a	A1	10	ancestor	18	2	B12	0.247	1.133	-13.3
12-3a-A1	12-3a-A1-anc40	anc	CIP	8	320	12	3a	A1	10	ancestor	18	2	A12	0.001	0.005	99.5
12-3a-A1	12-3a-A1-anc40	anc	CIP	0.25	10	12	3a	A1	10	ancestor	18	2	B12	0.164	0.745	25.5
12-3a-A1	12-3a-A1-anc40	anc	GEN	0	0	12	3a	A1	10	ancestor	18	2	C12	0.245	1.124	-12.4
12-3a-A1	12-3a-A1-anc40	anc	CEF	8	4.8	12	3a	A1	10	ancestor	18	2	A12	0	0	100
12-3a-A7	12-3a-A7-1	1	GEN	0.5	340	12	3a	A7	9	slow-regular	32	1	G2	0.01	0.041	95.9
12-3a-A7	12-3a-A7-1	1	CEF	0.5	0.3	12	3a	A7	9	slow-regular	32	1	G2	0.129	0.75	25
12-3a-A7	12-3a-A7-1	1	CIP	2	80	12	3a	A7	9	slow-regular	32	1	F2	0.001	0.005	99.5
12-3a-A7	12-3a-A7-1	1	CIP	8	320	12	3a	A7	9	slow-regular	32	1	A2	0.002	0.01	99
12-3a-A7	12-3a-A7-1	1	CEF	4	2.4	12	3a	A7	9	slow-regular	32	1	H2	0.03	0.174	82.6
12-3a-A7	12-3a-A7-1	1	CEF	0.125	0.075	12	3a	A7	9	slow-regular	32	1	E2	0.204	1.186	-18.6
12-3a-A7	12-3a-A7-1	1	CAR	4	280	12	3a	A7	9	slow-regular	32	1	H2	0.012	0.062	93.8
12-3a-A7	12-3a-A7-1	1	CEF	8	4.8	12	3a	A7	9	slow-regular	32	1	A2	0	0	100
12-3a-A7	12-3a-A7-1	1	DOR	8	400	12	3a	A7	9	slow-regular	32	1	A2	0	0	100
12-3a-A7	12-3a-A7-1	1	CAR	0.5	35	12	3a	A7	9	slow-regular	32	1	G2	0.15	0.773	22.7
12-3a-A7	12-3a-A7-1	1	GEN	0	0	12	3a	A7	9	slow-regular	32	1	C2	0.227	0.927	7.3
12-3a-A7	12-3a-A7-1	1	CEF	2	1.2	12	3a	A7	9	slow-regular	32	1	F2	0.002	0.012	98.8
12-3a-A7	12-3a-A7-1	1	DOR	2	100	12	3a	A7	9	slow-regular	32	1	F2	0	0	100
12-3a-A7	12-3a-A7-1	1	CAR	0.25	17.5	12	3a	A7	9	slow-regular	32	1	B2	0.196	1.01	-1
12-3a-A7	12-3a-A7-1	1	DOR	0.25	12.5	12	3a	A7	9	slow-regular	32	1	B2	0.089	0.41	59
12-3a-A7	12-3a-A7-1	1	DOR	4	200	12	3a	A7	9	slow-regular	32	1	H2	0.002	0.009	99.1
12-3a-A7	12-3a-A7-1	1	CIP	0.25	10	12	3a	A7	9	slow-regular	32	1	B2	0.161	0.839	16.1
12-3a-A7	12-3a-A7-1	1	CAR	8	560	12	3a	A7	9	slow-regular	32	1	A2	0.009	0.046	95.4
12-3a-A7	12-3a-A7-1	1	CEF	0.25	0.15	12	3a	A7	9	slow-regular	32	1	B2	0.155	0.901	9.9
12-3a-A7	12-3a-A7-1	1	GEN	4	2720	12	3a	A7	9	slow-regular	32	1	H2	0.001	0.004	99.6
12-3a-A7	12-3a-A7-1	1	GEN	1	680	12	3a	A7	9	slow-regular	32	1	D2	0.002	0.008	99.2
12-3a-A7	12-3a-A7-1	1	CAR	0	0	12	3a	A7	9	slow-regular	32	1	C2	0.182	0.938	6.2
12-3a-A7	12-3a-A7-1	1	CEF	1	0.6	12	3a	A7	9	slow-regular	32	1	D2	0.061	0.355	64.5
12-3a-A7	12-3a-A7-1	1	DOR	1	50	12	3a	A7	9	slow-regular	32	1	D2	0.003	0.014	98.6
12-3a-A7	12-3a-A7-1	1	CAR	1	70	12	3a	A7	9	slow-regular	32	1	D2	0.052	0.268	73.2
12-3a-A7	12-3a-A7-1	1	DOR	0.125	6.25	12	3a	A7	9	slow-regular	32	1	E2	0.231	1.065	-6.5
12-3a-A7	12-3a-A7-1	1	GEN	8	5440	12	3a	A7	9	slow-regular	32	1	A2	0	0	100
12-3a-A7	12-3a-A7-1	1	DOR	0.5	25	12	3a	A7	9	slow-regular	32	1	G2	0.039	0.18	82
12-3a-A7	12-3a-A7-1	1	DOR	0	0	12	3a	A7	9	slow-regular	32	1	C2	0.232	1.069	-6.9
12-3a-A7	12-3a-A7-1	1	CIP	1	40	12	3a	A7	9	slow-regular	32	1	D2	0.06	0.312	68.8
12-3a-A7	12-3a-A7-1	1	CAR	0.125	8.75	12	3a	A7	9	slow-regular	32	1	E2	0.224	1.155	-15.5
12-3a-A7	12-3a-A7-1	1	CEF	0	0	12	3a	A7	9	slow-regular	32	1	C2	0.197	1.145	-14.5
12-3a-A7	12-3a-A7-1	1	GEN	0.25	170	12	3a	A7	9	slow-regular	32	1	B2	0.188	0.767	23.3
12-3a-A7	12-3a-A7-1	1	CIP	0	0	12	3a	A7	9	slow-regular	32	1	C2	0.183	0.953	4.7
12-3a-A7	12-3a-A7-1	1	CIP	0.125	5	12	3a	A7	9	slow-regular	32	1	E2	0.175	0.911	8.9
12-3a-A7	12-3a-A7-1	1	CAR	2	140	12	3a	A7	9	slow-regular	32	1	F2	0.014	0.072	92.8
12-3a-A7	12-3a-A7-1	1	GEN	0.125	85	12	3a	A7	9	slow-regular	32	1	E2	0.187	0.763	23.7
12-3a-A7	12-3a-A7-1	1	GEN	2	1360	12	3a	A7	9	slow-regular	32	1	F2	0	0	100
12-3a-A7	12-3a-A7-1	1	CIP	4	160	12	3a	A7	9	slow-regular	32	1	H2	0.002	0.01	99
12-3a-A7	12-3a-A7-1	1	CIP	0.5	20	12	3a	A7	9	slow-regular	32	1	G2	0.126	0.656	34.4
12-3a-A7	12-3a-A7-10	1	CAR	1	70	12	3a	A7	9	slow-regular	32	1	D11	0.049	0.253	74.7
12-3a-A7	12-3a-A7-10	1	GEN	0.25	170	12	3a	A7	9	slow-regular	32	1	B11	0.188	0.767	23.3
12-3a-A7	12-3a-A7-10	1	GEN	8	5440	12	3a	A7	9	slow-regular	32	1	A11	0.001	0.004	99.6
12-3a-A7	12-3a-A7-10	1	CAR	0	0	12	3a	A7	9	slow-regular	32	1	C11	0.187	0.964	3.6
12-3a-A7	12-3a-A7-10	1	DOR	0.25	12.5	12	3a	A7	9	slow-regular	32	1	B11	0.086	0.396	60.4
12-3a-A7	12-3a-A7-10	1	CEF	0	0	12	3a	A7	9	slow-regular	32	1	C11	0.163	0.948	5.2
12-3a-A7	12-3a-A7-10	1	DOR	8	400	12	3a	A7	9	slow-regular	32	1	A11	0.002	0.009	99.1
12-3a-A7	12-3a-A7-10	1	CEF	0.125	0.075	12	3a	A7	9	slow-regular	32	1	E11	0.162	0.942	5.8
12-3a-A7	12-3a-A7-10	1	CIP	0.5	20	12	3a	A7	9	slow-regular	32	1	G11	0.124	0.646	35.4
12-3a-A7	12-3a-A7-10	1	CAR	4	280	12	3a	A7	9	slow-regular	32	1	H11	0.012	0.062	93.8
12-3a-A7	12-3a-A7-10	1	CEF	4	2.4	12	3a	A7	9	slow-regular	32	1	H11	0.011	0.064	93.6
12-3a-A7	12-3a-A7-10	1	DOR	0	0	12	3a	A7	9	slow-regular	32	1	C11	0.192	0.885	11.5
12-3a-A7	12-3a-A7-10	1	GEN	0.125	85	12	3a	A7	9	slow-regular	32	1	E11	0.19	0.776	22.4
12-3a-A7	12-3a-A7-10	1	CIP	2	80	12	3a	A7	9	slow-regular	32	1	F11	0.004	0.021	97.9
12-3a-A7	12-3a-A7-10	1	CEF	1	0.6	12	3a	A7	9	slow-regular	32	1	D11	0.069	0.401	59.9
12-3a-A7	12-3a-A7-10	1	GEN	1	680	12	3a	A7	9	slow-regular	32	1	D11	0.002	0.008	99.2
12-3a-A7	12-3a-A7-10	1	GEN	2	1360	12	3a	A7	9	slow-regular	32	1	F11	0.001	0.004	99.6
12-3a-A7	12-3a-A7-10	1	CEF	2	1.2	12	3a	A7	9	slow-regular	32	1	F11	0.009	0.052	94.8
12-3a-A7	12-3a-A7-10	1	CIP	0	0	12	3a	A7	9	slow-regular	32	1	C11	0.183	0.953	4.7
12-3a-A7	12-3a-A7-10	1	CIP	8	320	12	3a	A7	9	slow-regular	32	1	A11	0.001	0.005	99.5
12-3a-A7	12-3a-A7-10	1	CIP	4	160	12	3a	A7	9	slow-regular	32	1	H11	0.001	0.005	99.5
12-3a-A7	12-3a-A7-10	1	CEF	8	4.8	12	3a	A7	9	slow-regular	32	1	A11	0.042	0.244	75.6
12-3a-A7	12-3a-A7-10	1	CIP	0.25	10	12	3a	A7	9	slow-regular	32	1	B11	0.159	0.828	17.2
12-3a-A7	12-3a-A7-10	1	CAR	0.5	35	12	3a	A7	9	slow-regular	32	1	G11	0.153	0.789	21.1
12-3a-A7	12-3a-A7-10	1	CAR	0.25	17.5	12	3a	A7	9	slow-regular	32	1	B11	0.182	0.938	6.2
12-3a-A7	12-3a-A7-10	1	GEN	4	2720	12	3a	A7	9	slow-regular	32	1	H11	0.001	0.004	99.6
12-3a-A7	12-3a-A7-10	1	CEF	0.5	0.3	12	3a	A7	9	slow-regular	32	1	G11	0.15	0.872	12.8
12-3a-A7	12-3a-A7-10	1	CAR	8	560	12	3a	A7	9	slow-regular	32	1	A11	0.009	0.046	95.4
12-3a-A7	12-3a-A7-10	1	CIP	0.125	5	12	3a	A7	9	slow-regular	32	1	E11	0.176	0.917	8.3
12-3a-A7	12-3a-A7-10	1	CIP	1	40	12	3a	A7	9	slow-regular	32	1	D11	0.061	0.318	68.2
12-3a-A7	12-3a-A7-10	1	DOR	4	200	12	3a	A7	9	slow-regular	32	1	H11	0	0	100
12-3a-A7	12-3a-A7-10	1	DOR	0.5	25	12	3a	A7	9	slow-regular	32	1	G11	0.039	0.18	82
12-3a-A7	12-3a-A7-10	1	CEF	0.25	0.15	12	3a	A7	9	slow-regular	32	1	B11	0.194	1.128	-12.8
12-3a-A7	12-3a-A7-10	1	DOR	1	50	12	3a	A7	9	slow-regular	32	1	D11	0.004	0.018	98.2
12-3a-A7	12-3a-A7-10	1	CAR	2	140	12	3a	A7	9	slow-regular	32	1	F11	0.014	0.072	92.8
12-3a-A7	12-3a-A7-10	1	CAR	0.125	8.75	12	3a	A7	9	slow-regular	32	1	E11	0.184	0.948	5.2
12-3a-A7	12-3a-A7-10	1	DOR	2	100	12	3a	A7	9	slow-regular	32	1	F11	0	0	100
12-3a-A7	12-3a-A7-10	1	GEN	0	0	12	3a	A7	9	slow-regular	32	1	C11	0.189	0.771	22.9
12-3a-A7	12-3a-A7-10	1	GEN	0.5	340	12	3a	A7	9	slow-regular	32	1	G11	0.016	0.065	93.5
12-3a-A7	12-3a-A7-10	1	DOR	0.125	6.25	12	3a	A7	9	slow-regular	32	1	E11	0.191	0.88	12
12-3a-A7	12-3a-A7-11	1	CIP	0.125	5	12	3a	A7	9	slow-regular	32	2	E2	0.167	0.865	13.5
12-3a-A7	12-3a-A7-11	1	CIP	4	160	12	3a	A7	9	slow-regular	32	2	H2	0	0	100
12-3a-A7	12-3a-A7-11	1	DOR	4	200	12	3a	A7	9	slow-regular	32	2	H2	0.002	0.01	99
12-3a-A7	12-3a-A7-11	1	CEF	0.5	0.3	12	3a	A7	9	slow-regular	32	2	G2	0.117	0.594	40.6
12-3a-A7	12-3a-A7-11	1	CIP	0	0	12	3a	A7	9	slow-regular	32	2	C2	0.218	1.13	-13
12-3a-A7	12-3a-A7-11	1	CAR	0.25	17.5	12	3a	A7	9	slow-regular	32	2	B2	0.21	0.938	6.2
12-3a-A7	12-3a-A7-11	1	CIP	8	320	12	3a	A7	9	slow-regular	32	2	A2	0.001	0.005	99.5
12-3a-A7	12-3a-A7-11	1	GEN	0.25	170	12	3a	A7	9	slow-regular	32	2	B2	0.205	0.981	1.9
12-3a-A7	12-3a-A7-11	1	DOR	8	400	12	3a	A7	9	slow-regular	32	2	A2	0.001	0.005	99.5
12-3a-A7	12-3a-A7-11	1	GEN	0.5	340	12	3a	A7	9	slow-regular	32	2	G2	0.097	0.464	53.6
12-3a-A7	12-3a-A7-11	1	CAR	0	0	12	3a	A7	9	slow-regular	32	2	C2	0.188	0.839	16.1
12-3a-A7	12-3a-A7-11	1	CEF	0	0	12	3a	A7	9	slow-regular	32	2	C2	0.15	0.761	23.9
12-3a-A7	12-3a-A7-11	1	CAR	1	70	12	3a	A7	9	slow-regular	32	2	D2	0.051	0.228	77.2
12-3a-A7	12-3a-A7-11	1	DOR	0.125	6.25	12	3a	A7	9	slow-regular	32	2	E2	0.218	1.038	-3.8
12-3a-A7	12-3a-A7-11	1	CAR	0.5	35	12	3a	A7	9	slow-regular	32	2	G2	0.154	0.688	31.2
12-3a-A7	12-3a-A7-11	1	DOR	0	0	12	3a	A7	9	slow-regular	32	2	C2	0.182	0.867	13.3
12-3a-A7	12-3a-A7-11	1	GEN	0	0	12	3a	A7	9	slow-regular	32	2	C2	0.18	0.861	13.9
12-3a-A7	12-3a-A7-11	1	CEF	0.125	0.075	12	3a	A7	9	slow-regular	32	2	E2	0.194	0.985	1.5
12-3a-A7	12-3a-A7-11	1	CEF	1	0.6	12	3a	A7	9	slow-regular	32	2	D2	0.064	0.325	67.5
12-3a-A7	12-3a-A7-11	1	DOR	2	100	12	3a	A7	9	slow-regular	32	2	F2	0	0	100
12-3a-A7	12-3a-A7-11	1	GEN	2	1360	12	3a	A7	9	slow-regular	32	2	F2	0.006	0.029	97.1
12-3a-A7	12-3a-A7-11	1	CAR	8	560	12	3a	A7	9	slow-regular	32	2	A2	0.015	0.067	93.3
12-3a-A7	12-3a-A7-11	1	CAR	4	280	12	3a	A7	9	slow-regular	32	2	H2	0.037	0.165	83.5
12-3a-A7	12-3a-A7-11	1	CIP	2	80	12	3a	A7	9	slow-regular	32	2	F2	0.003	0.016	98.4
12-3a-A7	12-3a-A7-11	1	DOR	0.25	12.5	12	3a	A7	9	slow-regular	32	2	B2	0.087	0.414	58.6
12-3a-A7	12-3a-A7-11	1	GEN	1	680	12	3a	A7	9	slow-regular	32	2	D2	0.002	0.01	99
12-3a-A7	12-3a-A7-11	1	CEF	0.25	0.15	12	3a	A7	9	slow-regular	32	2	B2	0.191	0.97	3
12-3a-A7	12-3a-A7-11	1	CIP	0.25	10	12	3a	A7	9	slow-regular	32	2	B2	0.156	0.808	19.2
12-3a-A7	12-3a-A7-11	1	GEN	8	5440	12	3a	A7	9	slow-regular	32	2	A2	0.002	0.01	99
12-3a-A7	12-3a-A7-11	1	CEF	4	2.4	12	3a	A7	9	slow-regular	32	2	H2	0.003	0.015	98.5
12-3a-A7	12-3a-A7-11	1	GEN	4	2720	12	3a	A7	9	slow-regular	32	2	H2	0.001	0.005	99.5
12-3a-A7	12-3a-A7-11	1	DOR	0.5	25	12	3a	A7	9	slow-regular	32	2	G2	0.037	0.176	82.4
12-3a-A7	12-3a-A7-11	1	CIP	1	40	12	3a	A7	9	slow-regular	32	2	D2	0.056	0.29	71
12-3a-A7	12-3a-A7-11	1	CAR	0.125	8.75	12	3a	A7	9	slow-regular	32	2	E2	0.214	0.955	4.5
12-3a-A7	12-3a-A7-11	1	GEN	0.125	85	12	3a	A7	9	slow-regular	32	2	E2	0.183	0.876	12.4
12-3a-A7	12-3a-A7-11	1	CIP	0.5	20	12	3a	A7	9	slow-regular	32	2	G2	0.114	0.591	40.9
12-3a-A7	12-3a-A7-11	1	CAR	2	140	12	3a	A7	9	slow-regular	32	2	F2	0.018	0.08	92
12-3a-A7	12-3a-A7-11	1	DOR	1	50	12	3a	A7	9	slow-regular	32	2	D2	0.006	0.029	97.1
12-3a-A7	12-3a-A7-11	1	CEF	8	4.8	12	3a	A7	9	slow-regular	32	2	A2	0.035	0.178	82.2
12-3a-A7	12-3a-A7-11	1	CEF	2	1.2	12	3a	A7	9	slow-regular	32	2	F2	0.005	0.025	97.5
12-3a-A7	12-3a-A7-12	1	DOR	2	100	12	3a	A7	9	slow-regular	32	2	F3	0.001	0.005	99.5
12-3a-A7	12-3a-A7-12	1	CIP	0.125	5	12	3a	A7	9	slow-regular	32	2	E3	0.202	1.047	-4.7
12-3a-A7	12-3a-A7-12	1	GEN	0.5	340	12	3a	A7	9	slow-regular	32	2	G3	0.082	0.392	60.8
12-3a-A7	12-3a-A7-12	1	CAR	4	280	12	3a	A7	9	slow-regular	32	2	H3	0.01	0.045	95.5
12-3a-A7	12-3a-A7-12	1	CIP	0.5	20	12	3a	A7	9	slow-regular	32	2	G3	0.114	0.591	40.9
12-3a-A7	12-3a-A7-12	1	DOR	8	400	12	3a	A7	9	slow-regular	32	2	A3	0.001	0.005	99.5
12-3a-A7	12-3a-A7-12	1	CEF	0.125	0.075	12	3a	A7	9	slow-regular	32	2	E3	0.156	0.792	20.8
12-3a-A7	12-3a-A7-12	1	DOR	0.25	12.5	12	3a	A7	9	slow-regular	32	2	B3	0.089	0.424	57.6
12-3a-A7	12-3a-A7-12	1	DOR	0.125	6.25	12	3a	A7	9	slow-regular	32	2	E3	0.187	0.89	11
12-3a-A7	12-3a-A7-12	1	CIP	1	40	12	3a	A7	9	slow-regular	32	2	D3	0.051	0.264	73.6
12-3a-A7	12-3a-A7-12	1	GEN	4	2720	12	3a	A7	9	slow-regular	32	2	H3	0	0	100
12-3a-A7	12-3a-A7-12	1	DOR	0	0	12	3a	A7	9	slow-regular	32	2	C3	0.187	0.89	11
12-3a-A7	12-3a-A7-12	1	CIP	4	160	12	3a	A7	9	slow-regular	32	2	H3	0.001	0.005	99.5
12-3a-A7	12-3a-A7-12	1	CAR	2	140	12	3a	A7	9	slow-regular	32	2	F3	0.012	0.054	94.6
12-3a-A7	12-3a-A7-12	1	GEN	2	1360	12	3a	A7	9	slow-regular	32	2	F3	0	0	100
12-3a-A7	12-3a-A7-12	1	CEF	0.5	0.3	12	3a	A7	9	slow-regular	32	2	G3	0.142	0.721	27.9
12-3a-A7	12-3a-A7-12	1	CAR	1	70	12	3a	A7	9	slow-regular	32	2	D3	0.065	0.29	71
12-3a-A7	12-3a-A7-12	1	DOR	1	50	12	3a	A7	9	slow-regular	32	2	D3	0.003	0.014	98.6
12-3a-A7	12-3a-A7-12	1	CEF	4	2.4	12	3a	A7	9	slow-regular	32	2	H3	0.002	0.01	99
12-3a-A7	12-3a-A7-12	1	GEN	0	0	12	3a	A7	9	slow-regular	32	2	C3	0.183	0.876	12.4
12-3a-A7	12-3a-A7-12	1	DOR	0.5	25	12	3a	A7	9	slow-regular	32	2	G3	0.041	0.195	80.5
12-3a-A7	12-3a-A7-12	1	CIP	8	320	12	3a	A7	9	slow-regular	32	2	A3	0	0	100
12-3a-A7	12-3a-A7-12	1	DOR	4	200	12	3a	A7	9	slow-regular	32	2	H3	0.002	0.01	99
12-3a-A7	12-3a-A7-12	1	CAR	0.25	17.5	12	3a	A7	9	slow-regular	32	2	B3	0.178	0.795	20.5
12-3a-A7	12-3a-A7-12	1	CAR	0.5	35	12	3a	A7	9	slow-regular	32	2	G3	0.15	0.67	33
12-3a-A7	12-3a-A7-12	1	CAR	0	0	12	3a	A7	9	slow-regular	32	2	C3	0.182	0.812	18.8
12-3a-A7	12-3a-A7-12	1	CEF	2	1.2	12	3a	A7	9	slow-regular	32	2	F3	0.017	0.086	91.4
12-3a-A7	12-3a-A7-12	1	CEF	1	0.6	12	3a	A7	9	slow-regular	32	2	D3	0.055	0.279	72.1
12-3a-A7	12-3a-A7-12	1	GEN	0.25	170	12	3a	A7	9	slow-regular	32	2	B3	0.183	0.876	12.4
12-3a-A7	12-3a-A7-12	1	CAR	0.125	8.75	12	3a	A7	9	slow-regular	32	2	E3	0.178	0.795	20.5
12-3a-A7	12-3a-A7-12	1	GEN	0.125	85	12	3a	A7	9	slow-regular	32	2	E3	0.183	0.876	12.4
12-3a-A7	12-3a-A7-12	1	CIP	0.25	10	12	3a	A7	9	slow-regular	32	2	B3	0.159	0.824	17.6
12-3a-A7	12-3a-A7-12	1	CAR	8	560	12	3a	A7	9	slow-regular	32	2	A3	0.009	0.04	96
12-3a-A7	12-3a-A7-12	1	GEN	1	680	12	3a	A7	9	slow-regular	32	2	D3	0.001	0.005	99.5
12-3a-A7	12-3a-A7-12	1	CIP	0	0	12	3a	A7	9	slow-regular	32	2	C3	0.18	0.933	6.7
12-3a-A7	12-3a-A7-12	1	CEF	8	4.8	12	3a	A7	9	slow-regular	32	2	A3	0.002	0.01	99
12-3a-A7	12-3a-A7-12	1	CEF	0.25	0.15	12	3a	A7	9	slow-regular	32	2	B3	0.164	0.832	16.8
12-3a-A7	12-3a-A7-12	1	GEN	8	5440	12	3a	A7	9	slow-regular	32	2	A3	0.001	0.005	99.5
12-3a-A7	12-3a-A7-12	1	CEF	0	0	12	3a	A7	9	slow-regular	32	2	C3	0.195	0.99	1
12-3a-A7	12-3a-A7-12	1	CIP	2	80	12	3a	A7	9	slow-regular	32	2	F3	0.003	0.016	98.4
12-3a-A7	12-3a-A7-13	1	GEN	2	1360	12	3a	A7	9	slow-regular	32	2	F4	0	0	100
12-3a-A7	12-3a-A7-13	1	DOR	8	400	12	3a	A7	9	slow-regular	32	2	A4	0.002	0.01	99
12-3a-A7	12-3a-A7-13	1	GEN	0.5	340	12	3a	A7	9	slow-regular	32	2	G4	0.06	0.287	71.3
12-3a-A7	12-3a-A7-13	1	CAR	1	70	12	3a	A7	9	slow-regular	32	2	D4	0.067	0.299	70.1
12-3a-A7	12-3a-A7-13	1	CIP	1	40	12	3a	A7	9	slow-regular	32	2	D4	0.049	0.254	74.6
12-3a-A7	12-3a-A7-13	1	CAR	0.125	8.75	12	3a	A7	9	slow-regular	32	2	E4	0.188	0.839	16.1
12-3a-A7	12-3a-A7-13	1	CAR	8	560	12	3a	A7	9	slow-regular	32	2	A4	0.013	0.058	94.2
12-3a-A7	12-3a-A7-13	1	DOR	1	50	12	3a	A7	9	slow-regular	32	2	D4	0.005	0.024	97.6
12-3a-A7	12-3a-A7-13	1	CAR	0	0	12	3a	A7	9	slow-regular	32	2	C4	0.189	0.844	15.6
12-3a-A7	12-3a-A7-13	1	DOR	0.125	6.25	12	3a	A7	9	slow-regular	32	2	E4	0.214	1.019	-1.9
12-3a-A7	12-3a-A7-13	1	DOR	0	0	12	3a	A7	9	slow-regular	32	2	C4	0.198	0.943	5.7
12-3a-A7	12-3a-A7-13	1	GEN	0.125	85	12	3a	A7	9	slow-regular	32	2	E4	0.195	0.933	6.7
12-3a-A7	12-3a-A7-13	1	DOR	0.5	25	12	3a	A7	9	slow-regular	32	2	G4	0.04	0.19	81
12-3a-A7	12-3a-A7-13	1	CIP	2	80	12	3a	A7	9	slow-regular	32	2	F4	0.003	0.016	98.4
12-3a-A7	12-3a-A7-13	1	GEN	4	2720	12	3a	A7	9	slow-regular	32	2	H4	0.002	0.01	99
12-3a-A7	12-3a-A7-13	1	CIP	4	160	12	3a	A7	9	slow-regular	32	2	H4	0.001	0.005	99.5
12-3a-A7	12-3a-A7-13	1	CIP	8	320	12	3a	A7	9	slow-regular	32	2	A4	0.002	0.01	99
12-3a-A7	12-3a-A7-13	1	CEF	8	4.8	12	3a	A7	9	slow-regular	32	2	A4	0.005	0.025	97.5
12-3a-A7	12-3a-A7-13	1	CEF	0.5	0.3	12	3a	A7	9	slow-regular	32	2	G4	0.149	0.756	24.4
12-3a-A7	12-3a-A7-13	1	DOR	2	100	12	3a	A7	9	slow-regular	32	2	F4	0	0	100
12-3a-A7	12-3a-A7-13	1	CEF	0	0	12	3a	A7	9	slow-regular	32	2	C4	0.175	0.888	11.2
12-3a-A7	12-3a-A7-13	1	DOR	0.25	12.5	12	3a	A7	9	slow-regular	32	2	B4	0.081	0.386	61.4
12-3a-A7	12-3a-A7-13	1	GEN	1	680	12	3a	A7	9	slow-regular	32	2	D4	0.001	0.005	99.5
12-3a-A7	12-3a-A7-13	1	GEN	0	0	12	3a	A7	9	slow-regular	32	2	C4	0.192	0.919	8.1
12-3a-A7	12-3a-A7-13	1	CEF	0.125	0.075	12	3a	A7	9	slow-regular	32	2	E4	0.179	0.909	9.1
12-3a-A7	12-3a-A7-13	1	CEF	4	2.4	12	3a	A7	9	slow-regular	32	2	H4	0.036	0.183	81.7
12-3a-A7	12-3a-A7-13	1	CEF	2	1.2	12	3a	A7	9	slow-regular	32	2	F4	0.002	0.01	99
12-3a-A7	12-3a-A7-13	1	GEN	0.25	170	12	3a	A7	9	slow-regular	32	2	B4	0.202	0.967	3.3
12-3a-A7	12-3a-A7-13	1	CIP	0.5	20	12	3a	A7	9	slow-regular	32	2	G4	0.118	0.611	38.9
12-3a-A7	12-3a-A7-13	1	CAR	4	280	12	3a	A7	9	slow-regular	32	2	H4	0.014	0.062	93.8
12-3a-A7	12-3a-A7-13	1	CEF	1	0.6	12	3a	A7	9	slow-regular	32	2	D4	0.063	0.32	68
12-3a-A7	12-3a-A7-13	1	CAR	2	140	12	3a	A7	9	slow-regular	32	2	F4	0.014	0.062	93.8
12-3a-A7	12-3a-A7-13	1	CAR	0.5	35	12	3a	A7	9	slow-regular	32	2	G4	0.165	0.737	26.3
12-3a-A7	12-3a-A7-13	1	CAR	0.25	17.5	12	3a	A7	9	slow-regular	32	2	B4	0.185	0.826	17.4
12-3a-A7	12-3a-A7-13	1	GEN	8	5440	12	3a	A7	9	slow-regular	32	2	A4	0	0	100
12-3a-A7	12-3a-A7-13	1	DOR	4	200	12	3a	A7	9	slow-regular	32	2	H4	0.002	0.01	99
12-3a-A7	12-3a-A7-13	1	CEF	0.25	0.15	12	3a	A7	9	slow-regular	32	2	B4	0.162	0.822	17.8
12-3a-A7	12-3a-A7-13	1	CIP	0.25	10	12	3a	A7	9	slow-regular	32	2	B4	0.164	0.85	15
12-3a-A7	12-3a-A7-13	1	CIP	0.125	5	12	3a	A7	9	slow-regular	32	2	E4	0.181	0.938	6.2
12-3a-A7	12-3a-A7-13	1	CIP	0	0	12	3a	A7	9	slow-regular	32	2	C4	0.187	0.969	3.1
12-3a-A7	12-3a-A7-14	1	CAR	0.25	17.5	12	3a	A7	9	slow-regular	32	2	B5	0.173	0.772	22.8
12-3a-A7	12-3a-A7-14	1	CIP	4	160	12	3a	A7	9	slow-regular	32	2	H5	0.003	0.016	98.4
12-3a-A7	12-3a-A7-14	1	DOR	4	200	12	3a	A7	9	slow-regular	32	2	H5	0.005	0.024	97.6
12-3a-A7	12-3a-A7-14	1	CIP	1	40	12	3a	A7	9	slow-regular	32	2	D5	0.055	0.285	71.5
12-3a-A7	12-3a-A7-14	1	CEF	0.125	0.075	12	3a	A7	9	slow-regular	32	2	E5	0.194	0.985	1.5
12-3a-A7	12-3a-A7-14	1	GEN	2	1360	12	3a	A7	9	slow-regular	32	2	F5	0	0	100
12-3a-A7	12-3a-A7-14	1	GEN	0.25	170	12	3a	A7	9	slow-regular	32	2	B5	0.186	0.89	11
12-3a-A7	12-3a-A7-14	1	CAR	8	560	12	3a	A7	9	slow-regular	32	2	A5	0.012	0.054	94.6
12-3a-A7	12-3a-A7-14	1	GEN	4	2720	12	3a	A7	9	slow-regular	32	2	H5	0.006	0.029	97.1
12-3a-A7	12-3a-A7-14	1	GEN	0	0	12	3a	A7	9	slow-regular	32	2	C5	0.225	1.077	-7.7
12-3a-A7	12-3a-A7-14	1	DOR	0.125	6.25	12	3a	A7	9	slow-regular	32	2	E5	0.222	1.057	-5.7
12-3a-A7	12-3a-A7-14	1	CEF	8	4.8	12	3a	A7	9	slow-regular	32	2	A5	0.003	0.015	98.5
12-3a-A7	12-3a-A7-14	1	CEF	4	2.4	12	3a	A7	9	slow-regular	32	2	H5	0.002	0.01	99
12-3a-A7	12-3a-A7-14	1	CEF	2	1.2	12	3a	A7	9	slow-regular	32	2	F5	0.001	0.005	99.5
12-3a-A7	12-3a-A7-14	1	CEF	0.5	0.3	12	3a	A7	9	slow-regular	32	2	G5	0.139	0.706	29.4
12-3a-A7	12-3a-A7-14	1	CIP	0.5	20	12	3a	A7	9	slow-regular	32	2	G5	0.115	0.596	40.4
12-3a-A7	12-3a-A7-14	1	CIP	8	320	12	3a	A7	9	slow-regular	32	2	A5	0.002	0.01	99
12-3a-A7	12-3a-A7-14	1	CAR	1	70	12	3a	A7	9	slow-regular	32	2	D5	0.067	0.299	70.1
12-3a-A7	12-3a-A7-14	1	DOR	8	400	12	3a	A7	9	slow-regular	32	2	A5	0.002	0.01	99
12-3a-A7	12-3a-A7-14	1	DOR	0.5	25	12	3a	A7	9	slow-regular	32	2	G5	0.039	0.186	81.4
12-3a-A7	12-3a-A7-14	1	CEF	0	0	12	3a	A7	9	slow-regular	32	2	C5	0.189	0.959	4.1
12-3a-A7	12-3a-A7-14	1	DOR	1	50	12	3a	A7	9	slow-regular	32	2	D5	0.003	0.014	98.6
12-3a-A7	12-3a-A7-14	1	CAR	0.5	35	12	3a	A7	9	slow-regular	32	2	G5	0.151	0.674	32.6
12-3a-A7	12-3a-A7-14	1	DOR	0	0	12	3a	A7	9	slow-regular	32	2	C5	0.186	0.886	11.4
12-3a-A7	12-3a-A7-14	1	CAR	2	140	12	3a	A7	9	slow-regular	32	2	F5	0.015	0.067	93.3
12-3a-A7	12-3a-A7-14	1	CEF	0.25	0.15	12	3a	A7	9	slow-regular	32	2	B5	0.151	0.766	23.4
12-3a-A7	12-3a-A7-14	1	CIP	0.125	5	12	3a	A7	9	slow-regular	32	2	E5	0.169	0.876	12.4
12-3a-A7	12-3a-A7-14	1	GEN	1	680	12	3a	A7	9	slow-regular	32	2	D5	0.002	0.01	99
12-3a-A7	12-3a-A7-14	1	CEF	1	0.6	12	3a	A7	9	slow-regular	32	2	D5	0.062	0.315	68.5
12-3a-A7	12-3a-A7-14	1	DOR	0.25	12.5	12	3a	A7	9	slow-regular	32	2	B5	0.096	0.457	54.3
12-3a-A7	12-3a-A7-14	1	GEN	0.5	340	12	3a	A7	9	slow-regular	32	2	G5	0.028	0.134	86.6
12-3a-A7	12-3a-A7-14	1	CIP	0.25	10	12	3a	A7	9	slow-regular	32	2	B5	0.156	0.808	19.2
12-3a-A7	12-3a-A7-14	1	CIP	0	0	12	3a	A7	9	slow-regular	32	2	C5	0.18	0.933	6.7
12-3a-A7	12-3a-A7-14	1	GEN	0.125	85	12	3a	A7	9	slow-regular	32	2	E5	0.182	0.871	12.9
12-3a-A7	12-3a-A7-14	1	CAR	0	0	12	3a	A7	9	slow-regular	32	2	C5	0.191	0.853	14.7
12-3a-A7	12-3a-A7-14	1	GEN	8	5440	12	3a	A7	9	slow-regular	32	2	A5	0	0	100
12-3a-A7	12-3a-A7-14	1	CAR	0.125	8.75	12	3a	A7	9	slow-regular	32	2	E5	0.206	0.92	8
12-3a-A7	12-3a-A7-14	1	CAR	4	280	12	3a	A7	9	slow-regular	32	2	H5	0.016	0.071	92.9
12-3a-A7	12-3a-A7-14	1	CIP	2	80	12	3a	A7	9	slow-regular	32	2	F5	0.002	0.01	99
12-3a-A7	12-3a-A7-14	1	DOR	2	100	12	3a	A7	9	slow-regular	32	2	F5	0.001	0.005	99.5
12-3a-A7	12-3a-A7-15	1	CEF	0.5	0.3	12	3a	A7	9	slow-regular	32	2	G6	0.135	0.685	31.5
12-3a-A7	12-3a-A7-15	1	GEN	2	1360	12	3a	A7	9	slow-regular	32	2	F6	0	0	100
12-3a-A7	12-3a-A7-15	1	GEN	8	5440	12	3a	A7	9	slow-regular	32	2	A6	0	0	100
12-3a-A7	12-3a-A7-15	1	GEN	0.125	85	12	3a	A7	9	slow-regular	32	2	E6	0.214	1.024	-2.4
12-3a-A7	12-3a-A7-15	1	DOR	0.25	12.5	12	3a	A7	9	slow-regular	32	2	B6	0.085	0.405	59.5
12-3a-A7	12-3a-A7-15	1	DOR	4	200	12	3a	A7	9	slow-regular	32	2	H6	0.003	0.014	98.6
12-3a-A7	12-3a-A7-15	1	DOR	8	400	12	3a	A7	9	slow-regular	32	2	A6	0.001	0.005	99.5
12-3a-A7	12-3a-A7-15	1	CEF	0.125	0.075	12	3a	A7	9	slow-regular	32	2	E6	0.193	0.98	2
12-3a-A7	12-3a-A7-15	1	CIP	2	80	12	3a	A7	9	slow-regular	32	2	F6	0.011	0.057	94.3
12-3a-A7	12-3a-A7-15	1	CIP	1	40	12	3a	A7	9	slow-regular	32	2	D6	0.051	0.264	73.6
12-3a-A7	12-3a-A7-15	1	CAR	1	70	12	3a	A7	9	slow-regular	32	2	D6	0.068	0.304	69.6
12-3a-A7	12-3a-A7-15	1	CEF	2	1.2	12	3a	A7	9	slow-regular	32	2	F6	0.004	0.02	98
12-3a-A7	12-3a-A7-15	1	CEF	1	0.6	12	3a	A7	9	slow-regular	32	2	D6	0.065	0.33	67
12-3a-A7	12-3a-A7-15	1	CAR	2	140	12	3a	A7	9	slow-regular	32	2	F6	0.015	0.067	93.3
12-3a-A7	12-3a-A7-15	1	DOR	0.125	6.25	12	3a	A7	9	slow-regular	32	2	E6	0.219	1.043	-4.3
12-3a-A7	12-3a-A7-15	1	CEF	0	0	12	3a	A7	9	slow-regular	32	2	C6	0.157	0.797	20.3
12-3a-A7	12-3a-A7-15	1	CIP	4	160	12	3a	A7	9	slow-regular	32	2	H6	0.002	0.01	99
12-3a-A7	12-3a-A7-15	1	CIP	0.125	5	12	3a	A7	9	slow-regular	32	2	E6	0.173	0.896	10.4
12-3a-A7	12-3a-A7-15	1	DOR	1	50	12	3a	A7	9	slow-regular	32	2	D6	0.005	0.024	97.6
12-3a-A7	12-3a-A7-15	1	CAR	0.125	8.75	12	3a	A7	9	slow-regular	32	2	E6	0.213	0.951	4.9
12-3a-A7	12-3a-A7-15	1	CEF	8	4.8	12	3a	A7	9	slow-regular	32	2	A6	0.001	0.005	99.5
12-3a-A7	12-3a-A7-15	1	CEF	4	2.4	12	3a	A7	9	slow-regular	32	2	H6	0.005	0.025	97.5
12-3a-A7	12-3a-A7-15	1	CIP	0.5	20	12	3a	A7	9	slow-regular	32	2	G6	0.117	0.606	39.4
12-3a-A7	12-3a-A7-15	1	DOR	2	100	12	3a	A7	9	slow-regular	32	2	F6	0.001	0.005	99.5
12-3a-A7	12-3a-A7-15	1	CAR	4	280	12	3a	A7	9	slow-regular	32	2	H6	0.014	0.062	93.8
12-3a-A7	12-3a-A7-15	1	GEN	0.25	170	12	3a	A7	9	slow-regular	32	2	B6	0.18	0.861	13.9
12-3a-A7	12-3a-A7-15	1	CAR	8	560	12	3a	A7	9	slow-regular	32	2	A6	0.012	0.054	94.6
12-3a-A7	12-3a-A7-15	1	DOR	0	0	12	3a	A7	9	slow-regular	32	2	C6	0.182	0.867	13.3
12-3a-A7	12-3a-A7-15	1	GEN	4	2720	12	3a	A7	9	slow-regular	32	2	H6	0	0	100
12-3a-A7	12-3a-A7-15	1	GEN	1	680	12	3a	A7	9	slow-regular	32	2	D6	0.002	0.01	99
12-3a-A7	12-3a-A7-15	1	DOR	0.5	25	12	3a	A7	9	slow-regular	32	2	G6	0.043	0.205	79.5
12-3a-A7	12-3a-A7-15	1	CAR	0.5	35	12	3a	A7	9	slow-regular	32	2	G6	0.158	0.705	29.5
12-3a-A7	12-3a-A7-15	1	GEN	0.5	340	12	3a	A7	9	slow-regular	32	2	G6	0.04	0.191	80.9
12-3a-A7	12-3a-A7-15	1	CIP	0	0	12	3a	A7	9	slow-regular	32	2	C6	0.186	0.964	3.6
12-3a-A7	12-3a-A7-15	1	CAR	0	0	12	3a	A7	9	slow-regular	32	2	C6	0.223	0.996	0.4
12-3a-A7	12-3a-A7-15	1	CIP	8	320	12	3a	A7	9	slow-regular	32	2	A6	0.003	0.016	98.4
12-3a-A7	12-3a-A7-15	1	CEF	0.25	0.15	12	3a	A7	9	slow-regular	32	2	B6	0.145	0.736	26.4
12-3a-A7	12-3a-A7-15	1	GEN	0	0	12	3a	A7	9	slow-regular	32	2	C6	0.183	0.876	12.4
12-3a-A7	12-3a-A7-15	1	CAR	0.25	17.5	12	3a	A7	9	slow-regular	32	2	B6	0.177	0.79	21
12-3a-A7	12-3a-A7-15	1	CIP	0.25	10	12	3a	A7	9	slow-regular	32	2	B6	0.156	0.808	19.2
12-3a-A7	12-3a-A7-16	1	DOR	1	50	12	3a	A7	9	slow-regular	32	2	D7	0.004	0.019	98.1
12-3a-A7	12-3a-A7-16	1	CIP	1	40	12	3a	A7	9	slow-regular	32	2	D7	0.049	0.254	74.6
12-3a-A7	12-3a-A7-16	1	CIP	2	80	12	3a	A7	9	slow-regular	32	2	F7	0.005	0.026	97.4
12-3a-A7	12-3a-A7-16	1	CIP	0.5	20	12	3a	A7	9	slow-regular	32	2	G7	0.108	0.56	44
12-3a-A7	12-3a-A7-16	1	DOR	2	100	12	3a	A7	9	slow-regular	32	2	F7	0.001	0.005	99.5
12-3a-A7	12-3a-A7-16	1	CEF	0.25	0.15	12	3a	A7	9	slow-regular	32	2	B7	0.147	0.746	25.4
12-3a-A7	12-3a-A7-16	1	CAR	8	560	12	3a	A7	9	slow-regular	32	2	A7	0.011	0.049	95.1
12-3a-A7	12-3a-A7-16	1	DOR	0.5	25	12	3a	A7	9	slow-regular	32	2	G7	0.043	0.205	79.5
12-3a-A7	12-3a-A7-16	1	CEF	0.125	0.075	12	3a	A7	9	slow-regular	32	2	E7	0.149	0.756	24.4
12-3a-A7	12-3a-A7-16	1	CEF	1	0.6	12	3a	A7	9	slow-regular	32	2	D7	0.057	0.289	71.1
12-3a-A7	12-3a-A7-16	1	CIP	4	160	12	3a	A7	9	slow-regular	32	2	H7	0.002	0.01	99
12-3a-A7	12-3a-A7-16	1	DOR	0	0	12	3a	A7	9	slow-regular	32	2	C7	0.196	0.933	6.7
12-3a-A7	12-3a-A7-16	1	CAR	0.125	8.75	12	3a	A7	9	slow-regular	32	2	E7	0.172	0.768	23.2
12-3a-A7	12-3a-A7-16	1	GEN	2	1360	12	3a	A7	9	slow-regular	32	2	F7	0	0	100
12-3a-A7	12-3a-A7-16	1	DOR	8	400	12	3a	A7	9	slow-regular	32	2	A7	0.003	0.014	98.6
12-3a-A7	12-3a-A7-16	1	CIP	0.25	10	12	3a	A7	9	slow-regular	32	2	B7	0.154	0.798	20.2
12-3a-A7	12-3a-A7-16	1	CAR	0.25	17.5	12	3a	A7	9	slow-regular	32	2	B7	0.175	0.781	21.9
12-3a-A7	12-3a-A7-16	1	GEN	1	680	12	3a	A7	9	slow-regular	32	2	D7	0.001	0.005	99.5
12-3a-A7	12-3a-A7-16	1	DOR	4	200	12	3a	A7	9	slow-regular	32	2	H7	0.002	0.01	99
12-3a-A7	12-3a-A7-16	1	CEF	0.5	0.3	12	3a	A7	9	slow-regular	32	2	G7	0.133	0.675	32.5
12-3a-A7	12-3a-A7-16	1	GEN	0.125	85	12	3a	A7	9	slow-regular	32	2	E7	0.182	0.871	12.9
12-3a-A7	12-3a-A7-16	1	GEN	0	0	12	3a	A7	9	slow-regular	32	2	C7	0.182	0.871	12.9
12-3a-A7	12-3a-A7-16	1	GEN	0.5	340	12	3a	A7	9	slow-regular	32	2	G7	0.039	0.187	81.3
12-3a-A7	12-3a-A7-16	1	CEF	8	4.8	12	3a	A7	9	slow-regular	32	2	A7	0.007	0.036	96.4
12-3a-A7	12-3a-A7-16	1	CIP	0	0	12	3a	A7	9	slow-regular	32	2	C7	0.179	0.927	7.3
12-3a-A7	12-3a-A7-16	1	GEN	4	2720	12	3a	A7	9	slow-regular	32	2	H7	0	0	100
12-3a-A7	12-3a-A7-16	1	CAR	1	70	12	3a	A7	9	slow-regular	32	2	D7	0.07	0.312	68.8
12-3a-A7	12-3a-A7-16	1	CAR	4	280	12	3a	A7	9	slow-regular	32	2	H7	0.013	0.058	94.2
12-3a-A7	12-3a-A7-16	1	DOR	0.25	12.5	12	3a	A7	9	slow-regular	32	2	B7	0.109	0.519	48.1
12-3a-A7	12-3a-A7-16	1	DOR	0.125	6.25	12	3a	A7	9	slow-regular	32	2	E7	0.214	1.019	-1.9
12-3a-A7	12-3a-A7-16	1	CAR	2	140	12	3a	A7	9	slow-regular	32	2	F7	0.016	0.071	92.9
12-3a-A7	12-3a-A7-16	1	CEF	4	2.4	12	3a	A7	9	slow-regular	32	2	H7	0.003	0.015	98.5
12-3a-A7	12-3a-A7-16	1	CAR	0	0	12	3a	A7	9	slow-regular	32	2	C7	0.214	0.955	4.5
12-3a-A7	12-3a-A7-16	1	CIP	0.125	5	12	3a	A7	9	slow-regular	32	2	E7	0.167	0.865	13.5
12-3a-A7	12-3a-A7-16	1	CIP	8	320	12	3a	A7	9	slow-regular	32	2	A7	0	0	100
12-3a-A7	12-3a-A7-16	1	CAR	0.5	35	12	3a	A7	9	slow-regular	32	2	G7	0.156	0.696	30.4
12-3a-A7	12-3a-A7-16	1	GEN	8	5440	12	3a	A7	9	slow-regular	32	2	A7	0.001	0.005	99.5
12-3a-A7	12-3a-A7-16	1	CEF	2	1.2	12	3a	A7	9	slow-regular	32	2	F7	0.003	0.015	98.5
12-3a-A7	12-3a-A7-16	1	GEN	0.25	170	12	3a	A7	9	slow-regular	32	2	B7	0.178	0.852	14.8
12-3a-A7	12-3a-A7-16	1	CEF	0	0	12	3a	A7	9	slow-regular	32	2	C7	0.149	0.756	24.4
12-3a-A7	12-3a-A7-17	2	CEF	0.25	0.15	12	3a	A7	9	slow-regular	32	2	B8	0.011	0.056	94.4
12-3a-A7	12-3a-A7-17	2	GEN	8	5440	12	3a	A7	9	slow-regular	32	2	A8	0	0	100
12-3a-A7	12-3a-A7-17	2	GEN	1	680	12	3a	A7	9	slow-regular	32	2	D8	0	0	100
12-3a-A7	12-3a-A7-17	2	CAR	0.5	35	12	3a	A7	9	slow-regular	32	2	G8	0.011	0.049	95.1
12-3a-A7	12-3a-A7-17	2	CEF	0.125	0.075	12	3a	A7	9	slow-regular	32	2	E8	0.002	0.01	99
12-3a-A7	12-3a-A7-17	2	CEF	2	1.2	12	3a	A7	9	slow-regular	32	2	F8	0.028	0.142	85.8
12-3a-A7	12-3a-A7-17	2	GEN	0	0	12	3a	A7	9	slow-regular	32	2	C8	0.093	0.445	55.5
12-3a-A7	12-3a-A7-17	2	GEN	0.5	340	12	3a	A7	9	slow-regular	32	2	G8	0	0	100
12-3a-A7	12-3a-A7-17	2	CAR	0.125	8.75	12	3a	A7	9	slow-regular	32	2	E8	0.022	0.098	90.2
12-3a-A7	12-3a-A7-17	2	CAR	0.25	17.5	12	3a	A7	9	slow-regular	32	2	B8	0.019	0.085	91.5
12-3a-A7	12-3a-A7-17	2	CEF	0.5	0.3	12	3a	A7	9	slow-regular	32	2	G8	0.012	0.061	93.9
12-3a-A7	12-3a-A7-17	2	CIP	0.125	5	12	3a	A7	9	slow-regular	32	2	E8	0.025	0.13	87
12-3a-A7	12-3a-A7-17	2	DOR	8	400	12	3a	A7	9	slow-regular	32	2	A8	0.004	0.019	98.1
12-3a-A7	12-3a-A7-17	2	CAR	8	560	12	3a	A7	9	slow-regular	32	2	A8	0.002	0.009	99.1
12-3a-A7	12-3a-A7-17	2	CAR	2	140	12	3a	A7	9	slow-regular	32	2	F8	0.001	0.004	99.6
12-3a-A7	12-3a-A7-17	2	CEF	4	2.4	12	3a	A7	9	slow-regular	32	2	H8	0.027	0.137	86.3
12-3a-A7	12-3a-A7-17	2	GEN	2	1360	12	3a	A7	9	slow-regular	32	2	F8	0.001	0.005	99.5
12-3a-A7	12-3a-A7-17	2	GEN	0.125	85	12	3a	A7	9	slow-regular	32	2	E8	0.028	0.134	86.6
12-3a-A7	12-3a-A7-17	2	CIP	1	40	12	3a	A7	9	slow-regular	32	2	D8	0.003	0.016	98.4
12-3a-A7	12-3a-A7-17	2	CIP	4	160	12	3a	A7	9	slow-regular	32	2	H8	0	0	100
12-3a-A7	12-3a-A7-17	2	CIP	0.5	20	12	3a	A7	9	slow-regular	32	2	G8	0.008	0.041	95.9
12-3a-A7	12-3a-A7-17	2	DOR	0.125	6.25	12	3a	A7	9	slow-regular	32	2	E8	0.022	0.105	89.5
12-3a-A7	12-3a-A7-17	2	CAR	1	70	12	3a	A7	9	slow-regular	32	2	D8	0.001	0.004	99.6
12-3a-A7	12-3a-A7-17	2	CEF	8	4.8	12	3a	A7	9	slow-regular	32	2	A8	0.029	0.147	85.3
12-3a-A7	12-3a-A7-17	2	CIP	0	0	12	3a	A7	9	slow-regular	32	2	C8	0.045	0.233	76.7
12-3a-A7	12-3a-A7-17	2	CIP	0.25	10	12	3a	A7	9	slow-regular	32	2	B8	0.019	0.098	90.2
12-3a-A7	12-3a-A7-17	2	GEN	0.25	170	12	3a	A7	9	slow-regular	32	2	B8	0.005	0.024	97.6
12-3a-A7	12-3a-A7-17	2	DOR	0.25	12.5	12	3a	A7	9	slow-regular	32	2	B8	0.002	0.01	99
12-3a-A7	12-3a-A7-17	2	DOR	4	200	12	3a	A7	9	slow-regular	32	2	H8	0.002	0.01	99
12-3a-A7	12-3a-A7-17	2	GEN	4	2720	12	3a	A7	9	slow-regular	32	2	H8	0.001	0.005	99.5
12-3a-A7	12-3a-A7-17	2	CIP	8	320	12	3a	A7	9	slow-regular	32	2	A8	0.002	0.01	99
12-3a-A7	12-3a-A7-17	2	CEF	1	0.6	12	3a	A7	9	slow-regular	32	2	D8	0.028	0.142	85.8
12-3a-A7	12-3a-A7-17	2	DOR	2	100	12	3a	A7	9	slow-regular	32	2	F8	0.003	0.014	98.6
12-3a-A7	12-3a-A7-17	2	DOR	0.5	25	12	3a	A7	9	slow-regular	32	2	G8	0.001	0.005	99.5
12-3a-A7	12-3a-A7-17	2	CEF	0	0	12	3a	A7	9	slow-regular	32	2	C8	0.07	0.355	64.5
12-3a-A7	12-3a-A7-17	2	CIP	2	80	12	3a	A7	9	slow-regular	32	2	F8	0.001	0.005	99.5
12-3a-A7	12-3a-A7-17	2	DOR	0	0	12	3a	A7	9	slow-regular	32	2	C8	0.111	0.529	47.1
12-3a-A7	12-3a-A7-17	2	CAR	4	280	12	3a	A7	9	slow-regular	32	2	H8	0.001	0.004	99.6
12-3a-A7	12-3a-A7-17	2	DOR	1	50	12	3a	A7	9	slow-regular	32	2	D8	0.003	0.014	98.6
12-3a-A7	12-3a-A7-17	2	CAR	0	0	12	3a	A7	9	slow-regular	32	2	C8	0.043	0.192	80.8
12-3a-A7	12-3a-A7-18	1	CEF	0.125	0.075	12	3a	A7	9	slow-regular	32	2	E9	0.149	0.756	24.4
12-3a-A7	12-3a-A7-18	1	CEF	0	0	12	3a	A7	9	slow-regular	32	2	C9	0.179	0.909	9.1
12-3a-A7	12-3a-A7-18	1	CEF	2	1.2	12	3a	A7	9	slow-regular	32	2	F9	0.005	0.025	97.5
12-3a-A7	12-3a-A7-18	1	CAR	0.125	8.75	12	3a	A7	9	slow-regular	32	2	E9	0.178	0.795	20.5
12-3a-A7	12-3a-A7-18	1	CAR	8	560	12	3a	A7	9	slow-regular	32	2	A9	0.014	0.062	93.8
12-3a-A7	12-3a-A7-18	1	CAR	4	280	12	3a	A7	9	slow-regular	32	2	H9	0.016	0.071	92.9
12-3a-A7	12-3a-A7-18	1	CAR	2	140	12	3a	A7	9	slow-regular	32	2	F9	0.016	0.071	92.9
12-3a-A7	12-3a-A7-18	1	DOR	0.5	25	12	3a	A7	9	slow-regular	32	2	G9	0.025	0.119	88.1
12-3a-A7	12-3a-A7-18	1	CEF	1	0.6	12	3a	A7	9	slow-regular	32	2	D9	0.059	0.299	70.1
12-3a-A7	12-3a-A7-18	1	CEF	4	2.4	12	3a	A7	9	slow-regular	32	2	H9	0	0	100
12-3a-A7	12-3a-A7-18	1	CAR	1	70	12	3a	A7	9	slow-regular	32	2	D9	0.069	0.308	69.2
12-3a-A7	12-3a-A7-18	1	CIP	1	40	12	3a	A7	9	slow-regular	32	2	D9	0.053	0.275	72.5
12-3a-A7	12-3a-A7-18	1	CAR	0.5	35	12	3a	A7	9	slow-regular	32	2	G9	0.157	0.701	29.9
12-3a-A7	12-3a-A7-18	1	CAR	0.25	17.5	12	3a	A7	9	slow-regular	32	2	B9	0.176	0.786	21.4
12-3a-A7	12-3a-A7-18	1	CIP	0.5	20	12	3a	A7	9	slow-regular	32	2	G9	0.114	0.591	40.9
12-3a-A7	12-3a-A7-18	1	GEN	4	2720	12	3a	A7	9	slow-regular	32	2	H9	0.011	0.053	94.7
12-3a-A7	12-3a-A7-18	1	CEF	0.25	0.15	12	3a	A7	9	slow-regular	32	2	B9	0.149	0.756	24.4
12-3a-A7	12-3a-A7-18	1	CEF	8	4.8	12	3a	A7	9	slow-regular	32	2	A9	0.014	0.071	92.9
12-3a-A7	12-3a-A7-18	1	DOR	0.125	6.25	12	3a	A7	9	slow-regular	32	2	E9	0.183	0.871	12.9
12-3a-A7	12-3a-A7-18	1	GEN	2	1360	12	3a	A7	9	slow-regular	32	2	F9	0	0	100
12-3a-A7	12-3a-A7-18	1	CIP	2	80	12	3a	A7	9	slow-regular	32	2	F9	0.002	0.01	99
12-3a-A7	12-3a-A7-18	1	GEN	0.25	170	12	3a	A7	9	slow-regular	32	2	B9	0.182	0.871	12.9
12-3a-A7	12-3a-A7-18	1	GEN	0.125	85	12	3a	A7	9	slow-regular	32	2	E9	0.185	0.885	11.5
12-3a-A7	12-3a-A7-18	1	GEN	8	5440	12	3a	A7	9	slow-regular	32	2	A9	0	0	100
12-3a-A7	12-3a-A7-18	1	GEN	1	680	12	3a	A7	9	slow-regular	32	2	D9	0.001	0.005	99.5
12-3a-A7	12-3a-A7-18	1	GEN	0	0	12	3a	A7	9	slow-regular	32	2	C9	0.191	0.914	8.6
12-3a-A7	12-3a-A7-18	1	CAR	0	0	12	3a	A7	9	slow-regular	32	2	C9	0.209	0.933	6.7
12-3a-A7	12-3a-A7-18	1	CIP	0.25	10	12	3a	A7	9	slow-regular	32	2	B9	0.156	0.808	19.2
12-3a-A7	12-3a-A7-18	1	CIP	8	320	12	3a	A7	9	slow-regular	32	2	A9	0.002	0.01	99
12-3a-A7	12-3a-A7-18	1	DOR	4	200	12	3a	A7	9	slow-regular	32	2	H9	0.002	0.01	99
12-3a-A7	12-3a-A7-18	1	DOR	0.25	12.5	12	3a	A7	9	slow-regular	32	2	B9	0.057	0.271	72.9
12-3a-A7	12-3a-A7-18	1	GEN	0.5	340	12	3a	A7	9	slow-regular	32	2	G9	0.021	0.1	90
12-3a-A7	12-3a-A7-18	1	CEF	0.5	0.3	12	3a	A7	9	slow-regular	32	2	G9	0.137	0.695	30.5
12-3a-A7	12-3a-A7-18	1	DOR	8	400	12	3a	A7	9	slow-regular	32	2	A9	0.001	0.005	99.5
12-3a-A7	12-3a-A7-18	1	DOR	2	100	12	3a	A7	9	slow-regular	32	2	F9	0	0	100
12-3a-A7	12-3a-A7-18	1	CIP	0.125	5	12	3a	A7	9	slow-regular	32	2	E9	0.171	0.886	11.4
12-3a-A7	12-3a-A7-18	1	CIP	4	160	12	3a	A7	9	slow-regular	32	2	H9	0.001	0.005	99.5
12-3a-A7	12-3a-A7-18	1	CIP	0	0	12	3a	A7	9	slow-regular	32	2	C9	0.178	0.922	7.8
12-3a-A7	12-3a-A7-18	1	DOR	0	0	12	3a	A7	9	slow-regular	32	2	C9	0.182	0.867	13.3
12-3a-A7	12-3a-A7-18	1	DOR	1	50	12	3a	A7	9	slow-regular	32	2	D9	0.011	0.052	94.8
12-3a-A7	12-3a-A7-19	1	GEN	0.125	85	12	3a	A7	9	slow-regular	32	2	E10	0.203	0.971	2.9
12-3a-A7	12-3a-A7-19	1	CAR	0.125	8.75	12	3a	A7	9	slow-regular	32	2	E10	0.174	0.777	22.3
12-3a-A7	12-3a-A7-19	1	GEN	2	1360	12	3a	A7	9	slow-regular	32	2	F10	0	0	100
12-3a-A7	12-3a-A7-19	1	DOR	0.125	6.25	12	3a	A7	9	slow-regular	32	2	E10	0.185	0.881	11.9
12-3a-A7	12-3a-A7-19	1	CEF	0.25	0.15	12	3a	A7	9	slow-regular	32	2	B10	0.149	0.756	24.4
12-3a-A7	12-3a-A7-19	1	GEN	8	5440	12	3a	A7	9	slow-regular	32	2	A10	0	0	100
12-3a-A7	12-3a-A7-19	1	CEF	4	2.4	12	3a	A7	9	slow-regular	32	2	H10	0.004	0.02	98
12-3a-A7	12-3a-A7-19	1	DOR	0.5	25	12	3a	A7	9	slow-regular	32	2	G10	0.038	0.181	81.9
12-3a-A7	12-3a-A7-19	1	CIP	1	40	12	3a	A7	9	slow-regular	32	2	D10	0.056	0.29	71
12-3a-A7	12-3a-A7-19	1	CAR	0.25	17.5	12	3a	A7	9	slow-regular	32	2	B10	0.177	0.79	21
12-3a-A7	12-3a-A7-19	1	CIP	0.25	10	12	3a	A7	9	slow-regular	32	2	B10	0.157	0.813	18.7
12-3a-A7	12-3a-A7-19	1	CAR	1	70	12	3a	A7	9	slow-regular	32	2	D10	0.082	0.366	63.4
12-3a-A7	12-3a-A7-19	1	CIP	8	320	12	3a	A7	9	slow-regular	32	2	A10	0.001	0.005	99.5
12-3a-A7	12-3a-A7-19	1	GEN	1	680	12	3a	A7	9	slow-regular	32	2	D10	0.002	0.01	99
12-3a-A7	12-3a-A7-19	1	GEN	0	0	12	3a	A7	9	slow-regular	32	2	C10	0.183	0.876	12.4
12-3a-A7	12-3a-A7-19	1	CIP	0.125	5	12	3a	A7	9	slow-regular	32	2	E10	0.173	0.896	10.4
12-3a-A7	12-3a-A7-19	1	DOR	4	200	12	3a	A7	9	slow-regular	32	2	H10	0.003	0.014	98.6
12-3a-A7	12-3a-A7-19	1	CEF	2	1.2	12	3a	A7	9	slow-regular	32	2	F10	0.005	0.025	97.5
12-3a-A7	12-3a-A7-19	1	CIP	0	0	12	3a	A7	9	slow-regular	32	2	C10	0.178	0.922	7.8
12-3a-A7	12-3a-A7-19	1	CAR	0.5	35	12	3a	A7	9	slow-regular	32	2	G10	0.151	0.674	32.6
12-3a-A7	12-3a-A7-19	1	CIP	0.5	20	12	3a	A7	9	slow-regular	32	2	G10	0.114	0.591	40.9
12-3a-A7	12-3a-A7-19	1	CAR	4	280	12	3a	A7	9	slow-regular	32	2	H10	0.015	0.067	93.3
12-3a-A7	12-3a-A7-19	1	DOR	8	400	12	3a	A7	9	slow-regular	32	2	A10	0.001	0.005	99.5
12-3a-A7	12-3a-A7-19	1	DOR	0	0	12	3a	A7	9	slow-regular	32	2	C10	0.188	0.895	10.5
12-3a-A7	12-3a-A7-19	1	CIP	4	160	12	3a	A7	9	slow-regular	32	2	H10	0.003	0.016	98.4
12-3a-A7	12-3a-A7-19	1	CAR	0	0	12	3a	A7	9	slow-regular	32	2	C10	0.183	0.817	18.3
12-3a-A7	12-3a-A7-19	1	DOR	0.25	12.5	12	3a	A7	9	slow-regular	32	2	B10	0.078	0.371	62.9
12-3a-A7	12-3a-A7-19	1	GEN	4	2720	12	3a	A7	9	slow-regular	32	2	H10	0	0	100
12-3a-A7	12-3a-A7-19	1	CEF	0.125	0.075	12	3a	A7	9	slow-regular	32	2	E10	0.15	0.761	23.9
12-3a-A7	12-3a-A7-19	1	CEF	0.5	0.3	12	3a	A7	9	slow-regular	32	2	G10	0.137	0.695	30.5
12-3a-A7	12-3a-A7-19	1	CEF	1	0.6	12	3a	A7	9	slow-regular	32	2	D10	0.057	0.289	71.1
12-3a-A7	12-3a-A7-19	1	GEN	0.5	340	12	3a	A7	9	slow-regular	32	2	G10	0.015	0.072	92.8
12-3a-A7	12-3a-A7-19	1	GEN	0.25	170	12	3a	A7	9	slow-regular	32	2	B10	0.181	0.866	13.4
12-3a-A7	12-3a-A7-19	1	CIP	2	80	12	3a	A7	9	slow-regular	32	2	F10	0	0	100
12-3a-A7	12-3a-A7-19	1	DOR	2	100	12	3a	A7	9	slow-regular	32	2	F10	0.003	0.014	98.6
12-3a-A7	12-3a-A7-19	1	CAR	2	140	12	3a	A7	9	slow-regular	32	2	F10	0.013	0.058	94.2
12-3a-A7	12-3a-A7-19	1	CEF	8	4.8	12	3a	A7	9	slow-regular	32	2	A10	0.006	0.03	97
12-3a-A7	12-3a-A7-19	1	CAR	8	560	12	3a	A7	9	slow-regular	32	2	A10	0.013	0.058	94.2
12-3a-A7	12-3a-A7-19	1	CEF	0	0	12	3a	A7	9	slow-regular	32	2	C10	0.171	0.868	13.2
12-3a-A7	12-3a-A7-19	1	DOR	1	50	12	3a	A7	9	slow-regular	32	2	D10	0.004	0.019	98.1
12-3a-A7	12-3a-A7-2	1	CIP	2	80	12	3a	A7	9	slow-regular	32	1	F3	0.004	0.021	97.9
12-3a-A7	12-3a-A7-2	1	CAR	0.125	8.75	12	3a	A7	9	slow-regular	32	1	E3	0.181	0.933	6.7
12-3a-A7	12-3a-A7-2	1	GEN	1	680	12	3a	A7	9	slow-regular	32	1	D3	0.004	0.016	98.4
12-3a-A7	12-3a-A7-2	1	CEF	8	4.8	12	3a	A7	9	slow-regular	32	1	A3	0	0	100
12-3a-A7	12-3a-A7-2	1	GEN	0	0	12	3a	A7	9	slow-regular	32	1	C3	0.19	0.776	22.4
12-3a-A7	12-3a-A7-2	1	CAR	0.5	35	12	3a	A7	9	slow-regular	32	1	G3	0.15	0.773	22.7
12-3a-A7	12-3a-A7-2	1	CEF	2	1.2	12	3a	A7	9	slow-regular	32	1	F3	0.04	0.233	76.7
12-3a-A7	12-3a-A7-2	1	GEN	0.125	85	12	3a	A7	9	slow-regular	32	1	E3	0.189	0.771	22.9
12-3a-A7	12-3a-A7-2	1	CIP	0.125	5	12	3a	A7	9	slow-regular	32	1	E3	0.178	0.927	7.3
12-3a-A7	12-3a-A7-2	1	CIP	0.25	10	12	3a	A7	9	slow-regular	32	1	B3	0.159	0.828	17.2
12-3a-A7	12-3a-A7-2	1	CIP	0.5	20	12	3a	A7	9	slow-regular	32	1	G3	0.13	0.677	32.3
12-3a-A7	12-3a-A7-2	1	CEF	0.25	0.15	12	3a	A7	9	slow-regular	32	1	B3	0.157	0.913	8.7
12-3a-A7	12-3a-A7-2	1	CEF	0	0	12	3a	A7	9	slow-regular	32	1	C3	0.166	0.965	3.5
12-3a-A7	12-3a-A7-2	1	CAR	0	0	12	3a	A7	9	slow-regular	32	1	C3	0.186	0.959	4.1
12-3a-A7	12-3a-A7-2	1	GEN	2	1360	12	3a	A7	9	slow-regular	32	1	F3	0.001	0.004	99.6
12-3a-A7	12-3a-A7-2	1	CEF	1	0.6	12	3a	A7	9	slow-regular	32	1	D3	0.056	0.326	67.4
12-3a-A7	12-3a-A7-2	1	CAR	4	280	12	3a	A7	9	slow-regular	32	1	H3	0.012	0.062	93.8
12-3a-A7	12-3a-A7-2	1	DOR	2	100	12	3a	A7	9	slow-regular	32	1	F3	0	0	100
12-3a-A7	12-3a-A7-2	1	GEN	4	2720	12	3a	A7	9	slow-regular	32	1	H3	0	0	100
12-3a-A7	12-3a-A7-2	1	CIP	0	0	12	3a	A7	9	slow-regular	32	1	C3	0.191	0.995	0.5
12-3a-A7	12-3a-A7-2	1	DOR	4	200	12	3a	A7	9	slow-regular	32	1	H3	0.001	0.005	99.5
12-3a-A7	12-3a-A7-2	1	CAR	1	70	12	3a	A7	9	slow-regular	32	1	D3	0.056	0.289	71.1
12-3a-A7	12-3a-A7-2	1	DOR	8	400	12	3a	A7	9	slow-regular	32	1	A3	0.002	0.009	99.1
12-3a-A7	12-3a-A7-2	1	DOR	0	0	12	3a	A7	9	slow-regular	32	1	C3	0.192	0.885	11.5
12-3a-A7	12-3a-A7-2	1	DOR	1	50	12	3a	A7	9	slow-regular	32	1	D3	0.003	0.014	98.6
12-3a-A7	12-3a-A7-2	1	DOR	0.5	25	12	3a	A7	9	slow-regular	32	1	G3	0.043	0.198	80.2
12-3a-A7	12-3a-A7-2	1	DOR	0.125	6.25	12	3a	A7	9	slow-regular	32	1	E3	0.234	1.078	-7.8
12-3a-A7	12-3a-A7-2	1	GEN	8	5440	12	3a	A7	9	slow-regular	32	1	A3	0.001	0.004	99.6
12-3a-A7	12-3a-A7-2	1	CAR	0.25	17.5	12	3a	A7	9	slow-regular	32	1	B3	0.182	0.938	6.2
12-3a-A7	12-3a-A7-2	1	CEF	0.5	0.3	12	3a	A7	9	slow-regular	32	1	G3	0.147	0.855	14.5
12-3a-A7	12-3a-A7-2	1	GEN	0.25	170	12	3a	A7	9	slow-regular	32	1	B3	0.186	0.759	24.1
12-3a-A7	12-3a-A7-2	1	GEN	0.5	340	12	3a	A7	9	slow-regular	32	1	G3	0.01	0.041	95.9
12-3a-A7	12-3a-A7-2	1	CIP	1	40	12	3a	A7	9	slow-regular	32	1	D3	0.06	0.312	68.8
12-3a-A7	12-3a-A7-2	1	CEF	0.125	0.075	12	3a	A7	9	slow-regular	32	1	E3	0.16	0.93	7
12-3a-A7	12-3a-A7-2	1	CIP	8	320	12	3a	A7	9	slow-regular	32	1	A3	0.001	0.005	99.5
12-3a-A7	12-3a-A7-2	1	CIP	4	160	12	3a	A7	9	slow-regular	32	1	H3	0.002	0.01	99
12-3a-A7	12-3a-A7-2	1	DOR	0.25	12.5	12	3a	A7	9	slow-regular	32	1	B3	0.079	0.364	63.6
12-3a-A7	12-3a-A7-2	1	CAR	8	560	12	3a	A7	9	slow-regular	32	1	A3	0.053	0.273	72.7
12-3a-A7	12-3a-A7-2	1	CEF	4	2.4	12	3a	A7	9	slow-regular	32	1	H3	0.023	0.134	86.6
12-3a-A7	12-3a-A7-2	1	CAR	2	140	12	3a	A7	9	slow-regular	32	1	F3	0.019	0.098	90.2
12-3a-A7	12-3a-A7-20	1	CIP	0.5	20	12	3a	A7	9	slow-regular	32	2	G11	0.118	0.611	38.9
12-3a-A7	12-3a-A7-20	1	GEN	2	1360	12	3a	A7	9	slow-regular	32	2	F11	0.001	0.005	99.5
12-3a-A7	12-3a-A7-20	1	CAR	4	280	12	3a	A7	9	slow-regular	32	2	H11	0.015	0.067	93.3
12-3a-A7	12-3a-A7-20	1	CEF	0.5	0.3	12	3a	A7	9	slow-regular	32	2	G11	0.135	0.685	31.5
12-3a-A7	12-3a-A7-20	1	DOR	1	50	12	3a	A7	9	slow-regular	32	2	D11	0.004	0.019	98.1
12-3a-A7	12-3a-A7-20	1	GEN	0.125	85	12	3a	A7	9	slow-regular	32	2	E11	0.183	0.876	12.4
12-3a-A7	12-3a-A7-20	1	CEF	2	1.2	12	3a	A7	9	slow-regular	32	2	F11	0.008	0.041	95.9
12-3a-A7	12-3a-A7-20	1	DOR	0	0	12	3a	A7	9	slow-regular	32	2	C11	0.22	1.048	-4.8
12-3a-A7	12-3a-A7-20	1	CAR	0.25	17.5	12	3a	A7	9	slow-regular	32	2	B11	0.174	0.777	22.3
12-3a-A7	12-3a-A7-20	1	CEF	0.25	0.15	12	3a	A7	9	slow-regular	32	2	B11	0.147	0.746	25.4
12-3a-A7	12-3a-A7-20	1	DOR	0.125	6.25	12	3a	A7	9	slow-regular	32	2	E11	0.181	0.862	13.8
12-3a-A7	12-3a-A7-20	1	CAR	0.5	35	12	3a	A7	9	slow-regular	32	2	G11	0.163	0.728	27.2
12-3a-A7	12-3a-A7-20	1	GEN	4	2720	12	3a	A7	9	slow-regular	32	2	H11	0.001	0.005	99.5
12-3a-A7	12-3a-A7-20	1	GEN	1	680	12	3a	A7	9	slow-regular	32	2	D11	0.002	0.01	99
12-3a-A7	12-3a-A7-20	1	CIP	2	80	12	3a	A7	9	slow-regular	32	2	F11	0.004	0.021	97.9
12-3a-A7	12-3a-A7-20	1	GEN	0.5	340	12	3a	A7	9	slow-regular	32	2	G11	0.029	0.139	86.1
12-3a-A7	12-3a-A7-20	1	CAR	0.125	8.75	12	3a	A7	9	slow-regular	32	2	E11	0.175	0.781	21.9
12-3a-A7	12-3a-A7-20	1	CEF	0	0	12	3a	A7	9	slow-regular	32	2	C11	0.184	0.934	6.6
12-3a-A7	12-3a-A7-20	1	CIP	0.25	10	12	3a	A7	9	slow-regular	32	2	B11	0.155	0.803	19.7
12-3a-A7	12-3a-A7-20	1	GEN	8	5440	12	3a	A7	9	slow-regular	32	2	A11	0.001	0.005	99.5
12-3a-A7	12-3a-A7-20	1	DOR	4	200	12	3a	A7	9	slow-regular	32	2	H11	0	0	100
12-3a-A7	12-3a-A7-20	1	CEF	1	0.6	12	3a	A7	9	slow-regular	32	2	D11	0.06	0.305	69.5
12-3a-A7	12-3a-A7-20	1	CEF	4	2.4	12	3a	A7	9	slow-regular	32	2	H11	0.006	0.03	97
12-3a-A7	12-3a-A7-20	1	CAR	0	0	12	3a	A7	9	slow-regular	32	2	C11	0.177	0.79	21
12-3a-A7	12-3a-A7-20	1	DOR	0.5	25	12	3a	A7	9	slow-regular	32	2	G11	0.036	0.171	82.9
12-3a-A7	12-3a-A7-20	1	CAR	2	140	12	3a	A7	9	slow-regular	32	2	F11	0.021	0.094	90.6
12-3a-A7	12-3a-A7-20	1	DOR	8	400	12	3a	A7	9	slow-regular	32	2	A11	0.001	0.005	99.5
12-3a-A7	12-3a-A7-20	1	DOR	2	100	12	3a	A7	9	slow-regular	32	2	F11	0	0	100
12-3a-A7	12-3a-A7-20	1	CIP	1	40	12	3a	A7	9	slow-regular	32	2	D11	0.055	0.285	71.5
12-3a-A7	12-3a-A7-20	1	CIP	0.125	5	12	3a	A7	9	slow-regular	32	2	E11	0.168	0.87	13
12-3a-A7	12-3a-A7-20	1	CEF	8	4.8	12	3a	A7	9	slow-regular	32	2	A11	0.012	0.061	93.9
12-3a-A7	12-3a-A7-20	1	CAR	1	70	12	3a	A7	9	slow-regular	32	2	D11	0.062	0.277	72.3
12-3a-A7	12-3a-A7-20	1	DOR	0.25	12.5	12	3a	A7	9	slow-regular	32	2	B11	0.094	0.448	55.2
12-3a-A7	12-3a-A7-20	1	CIP	0	0	12	3a	A7	9	slow-regular	32	2	C11	0.177	0.917	8.3
12-3a-A7	12-3a-A7-20	1	GEN	0.25	170	12	3a	A7	9	slow-regular	32	2	B11	0.19	0.909	9.1
12-3a-A7	12-3a-A7-20	1	CIP	8	320	12	3a	A7	9	slow-regular	32	2	A11	0.001	0.005	99.5
12-3a-A7	12-3a-A7-20	1	CEF	0.125	0.075	12	3a	A7	9	slow-regular	32	2	E11	0.184	0.934	6.6
12-3a-A7	12-3a-A7-20	1	GEN	0	0	12	3a	A7	9	slow-regular	32	2	C11	0.18	0.861	13.9
12-3a-A7	12-3a-A7-20	1	CIP	4	160	12	3a	A7	9	slow-regular	32	2	H11	0.001	0.005	99.5
12-3a-A7	12-3a-A7-20	1	CAR	8	560	12	3a	A7	9	slow-regular	32	2	A11	0.011	0.049	95.1
12-3a-A7	12-3a-A7-3	1	GEN	1	680	12	3a	A7	9	slow-regular	32	1	D4	0.001	0.004	99.6
12-3a-A7	12-3a-A7-3	1	CEF	0.125	0.075	12	3a	A7	9	slow-regular	32	1	E4	0.16	0.93	7
12-3a-A7	12-3a-A7-3	1	CAR	4	280	12	3a	A7	9	slow-regular	32	1	H4	0.012	0.062	93.8
12-3a-A7	12-3a-A7-3	1	DOR	0.5	25	12	3a	A7	9	slow-regular	32	1	G4	0.042	0.194	80.6
12-3a-A7	12-3a-A7-3	1	CEF	1	0.6	12	3a	A7	9	slow-regular	32	1	D4	0.054	0.314	68.6
12-3a-A7	12-3a-A7-3	1	CAR	0.25	17.5	12	3a	A7	9	slow-regular	32	1	B4	0.218	1.124	-12.4
12-3a-A7	12-3a-A7-3	1	DOR	2	100	12	3a	A7	9	slow-regular	32	1	F4	0	0	100
12-3a-A7	12-3a-A7-3	1	DOR	8	400	12	3a	A7	9	slow-regular	32	1	A4	0.002	0.009	99.1
12-3a-A7	12-3a-A7-3	1	CAR	2	140	12	3a	A7	9	slow-regular	32	1	F4	0.014	0.072	92.8
12-3a-A7	12-3a-A7-3	1	CAR	0	0	12	3a	A7	9	slow-regular	32	1	C4	0.198	1.021	-2.1
12-3a-A7	12-3a-A7-3	1	CIP	2	80	12	3a	A7	9	slow-regular	32	1	F4	0.003	0.016	98.4
12-3a-A7	12-3a-A7-3	1	DOR	4	200	12	3a	A7	9	slow-regular	32	1	H4	0.001	0.005	99.5
12-3a-A7	12-3a-A7-3	1	GEN	0.25	170	12	3a	A7	9	slow-regular	32	1	B4	0.185	0.755	24.5
12-3a-A7	12-3a-A7-3	1	CEF	0	0	12	3a	A7	9	slow-regular	32	1	C4	0.172	1	0
12-3a-A7	12-3a-A7-3	1	GEN	8	5440	12	3a	A7	9	slow-regular	32	1	A4	0	0	100
12-3a-A7	12-3a-A7-3	1	GEN	2	1360	12	3a	A7	9	slow-regular	32	1	F4	0.001	0.004	99.6
12-3a-A7	12-3a-A7-3	1	GEN	0	0	12	3a	A7	9	slow-regular	32	1	C4	0.183	0.747	25.3
12-3a-A7	12-3a-A7-3	1	DOR	1	50	12	3a	A7	9	slow-regular	32	1	D4	0.004	0.018	98.2
12-3a-A7	12-3a-A7-3	1	CIP	0.25	10	12	3a	A7	9	slow-regular	32	1	B4	0.159	0.828	17.2
12-3a-A7	12-3a-A7-3	1	CIP	0	0	12	3a	A7	9	slow-regular	32	1	C4	0.176	0.917	8.3
12-3a-A7	12-3a-A7-3	1	CEF	0.25	0.15	12	3a	A7	9	slow-regular	32	1	B4	0.184	1.07	-7
12-3a-A7	12-3a-A7-3	1	CAR	8	560	12	3a	A7	9	slow-regular	32	1	A4	0.006	0.031	96.9
12-3a-A7	12-3a-A7-3	1	DOR	0.25	12.5	12	3a	A7	9	slow-regular	32	1	B4	0.081	0.373	62.7
12-3a-A7	12-3a-A7-3	1	CIP	0.125	5	12	3a	A7	9	slow-regular	32	1	E4	0.179	0.932	6.8
12-3a-A7	12-3a-A7-3	1	CIP	0.5	20	12	3a	A7	9	slow-regular	32	1	G4	0.127	0.661	33.9
12-3a-A7	12-3a-A7-3	1	CEF	4	2.4	12	3a	A7	9	slow-regular	32	1	H4	0.002	0.012	98.8
12-3a-A7	12-3a-A7-3	1	CEF	8	4.8	12	3a	A7	9	slow-regular	32	1	A4	0.062	0.36	64
12-3a-A7	12-3a-A7-3	1	CEF	2	1.2	12	3a	A7	9	slow-regular	32	1	F4	0.007	0.041	95.9
12-3a-A7	12-3a-A7-3	1	GEN	4	2720	12	3a	A7	9	slow-regular	32	1	H4	0.001	0.004	99.6
12-3a-A7	12-3a-A7-3	1	CIP	4	160	12	3a	A7	9	slow-regular	32	1	H4	0.001	0.005	99.5
12-3a-A7	12-3a-A7-3	1	CAR	1	70	12	3a	A7	9	slow-regular	32	1	D4	0.05	0.258	74.2
12-3a-A7	12-3a-A7-3	1	CAR	0.125	8.75	12	3a	A7	9	slow-regular	32	1	E4	0.182	0.938	6.2
12-3a-A7	12-3a-A7-3	1	CIP	1	40	12	3a	A7	9	slow-regular	32	1	D4	0.058	0.302	69.8
12-3a-A7	12-3a-A7-3	1	GEN	0.5	340	12	3a	A7	9	slow-regular	32	1	G4	0.013	0.053	94.7
12-3a-A7	12-3a-A7-3	1	DOR	0.125	6.25	12	3a	A7	9	slow-regular	32	1	E4	0.194	0.894	10.6
12-3a-A7	12-3a-A7-3	1	CAR	0.5	35	12	3a	A7	9	slow-regular	32	1	G4	0.154	0.794	20.6
12-3a-A7	12-3a-A7-3	1	CIP	8	320	12	3a	A7	9	slow-regular	32	1	A4	0.002	0.01	99
12-3a-A7	12-3a-A7-3	1	CEF	0.5	0.3	12	3a	A7	9	slow-regular	32	1	G4	0.146	0.849	15.1
12-3a-A7	12-3a-A7-3	1	GEN	0.125	85	12	3a	A7	9	slow-regular	32	1	E4	0.188	0.767	23.3
12-3a-A7	12-3a-A7-3	1	DOR	0	0	12	3a	A7	9	slow-regular	32	1	C4	0.19	0.876	12.4
12-3a-A7	12-3a-A7-4	1	DOR	0.25	12.5	12	3a	A7	9	slow-regular	32	1	B5	0.082	0.378	62.2
12-3a-A7	12-3a-A7-4	1	CAR	4	280	12	3a	A7	9	slow-regular	32	1	H5	0.013	0.067	93.3
12-3a-A7	12-3a-A7-4	1	CIP	0	0	12	3a	A7	9	slow-regular	32	1	C5	0.184	0.958	4.2
12-3a-A7	12-3a-A7-4	1	DOR	0	0	12	3a	A7	9	slow-regular	32	1	C5	0.187	0.862	13.8
12-3a-A7	12-3a-A7-4	1	CIP	8	320	12	3a	A7	9	slow-regular	32	1	A5	0.002	0.01	99
12-3a-A7	12-3a-A7-4	1	CEF	1	0.6	12	3a	A7	9	slow-regular	32	1	D5	0.071	0.413	58.7
12-3a-A7	12-3a-A7-4	1	DOR	2	100	12	3a	A7	9	slow-regular	32	1	F5	0	0	100
12-3a-A7	12-3a-A7-4	1	GEN	8	5440	12	3a	A7	9	slow-regular	32	1	A5	0	0	100
12-3a-A7	12-3a-A7-4	1	DOR	1	50	12	3a	A7	9	slow-regular	32	1	D5	0.004	0.018	98.2
12-3a-A7	12-3a-A7-4	1	CEF	0.125	0.075	12	3a	A7	9	slow-regular	32	1	E5	0.199	1.157	-15.7
12-3a-A7	12-3a-A7-4	1	CAR	0	0	12	3a	A7	9	slow-regular	32	1	C5	0.183	0.943	5.7
12-3a-A7	12-3a-A7-4	1	DOR	0.5	25	12	3a	A7	9	slow-regular	32	1	G5	0.044	0.203	79.7
12-3a-A7	12-3a-A7-4	1	CIP	2	80	12	3a	A7	9	slow-regular	32	1	F5	0.004	0.021	97.9
12-3a-A7	12-3a-A7-4	1	GEN	0.125	85	12	3a	A7	9	slow-regular	32	1	E5	0.187	0.763	23.7
12-3a-A7	12-3a-A7-4	1	GEN	0	0	12	3a	A7	9	slow-regular	32	1	C5	0.191	0.78	22
12-3a-A7	12-3a-A7-4	1	GEN	2	1360	12	3a	A7	9	slow-regular	32	1	F5	0	0	100
12-3a-A7	12-3a-A7-4	1	CEF	0.5	0.3	12	3a	A7	9	slow-regular	32	1	G5	0.142	0.826	17.4
12-3a-A7	12-3a-A7-4	1	CAR	1	70	12	3a	A7	9	slow-regular	32	1	D5	0.052	0.268	73.2
12-3a-A7	12-3a-A7-4	1	CEF	4	2.4	12	3a	A7	9	slow-regular	32	1	H5	0.018	0.105	89.5
12-3a-A7	12-3a-A7-4	1	GEN	4	2720	12	3a	A7	9	slow-regular	32	1	H5	0.002	0.008	99.2
12-3a-A7	12-3a-A7-4	1	CEF	2	1.2	12	3a	A7	9	slow-regular	32	1	F5	0.014	0.081	91.9
12-3a-A7	12-3a-A7-4	1	CEF	8	4.8	12	3a	A7	9	slow-regular	32	1	A5	0.031	0.18	82
12-3a-A7	12-3a-A7-4	1	CIP	0.125	5	12	3a	A7	9	slow-regular	32	1	E5	0.173	0.901	9.9
12-3a-A7	12-3a-A7-4	1	CAR	0.125	8.75	12	3a	A7	9	slow-regular	32	1	E5	0.216	1.113	-11.3
12-3a-A7	12-3a-A7-4	1	CAR	0.25	17.5	12	3a	A7	9	slow-regular	32	1	B5	0.176	0.907	9.3
12-3a-A7	12-3a-A7-4	1	CEF	0.25	0.15	12	3a	A7	9	slow-regular	32	1	B5	0.193	1.122	-12.2
12-3a-A7	12-3a-A7-4	1	DOR	8	400	12	3a	A7	9	slow-regular	32	1	A5	0.001	0.005	99.5
12-3a-A7	12-3a-A7-4	1	CEF	0	0	12	3a	A7	9	slow-regular	32	1	C5	0.159	0.924	7.6
12-3a-A7	12-3a-A7-4	1	DOR	4	200	12	3a	A7	9	slow-regular	32	1	H5	0.022	0.101	89.9
12-3a-A7	12-3a-A7-4	1	CAR	0.5	35	12	3a	A7	9	slow-regular	32	1	G5	0.15	0.773	22.7
12-3a-A7	12-3a-A7-4	1	GEN	1	680	12	3a	A7	9	slow-regular	32	1	D5	0.002	0.008	99.2
12-3a-A7	12-3a-A7-4	1	CAR	8	560	12	3a	A7	9	slow-regular	32	1	A5	0.01	0.052	94.8
12-3a-A7	12-3a-A7-4	1	CAR	2	140	12	3a	A7	9	slow-regular	32	1	F5	0.014	0.072	92.8
12-3a-A7	12-3a-A7-4	1	CIP	0.5	20	12	3a	A7	9	slow-regular	32	1	G5	0.126	0.656	34.4
12-3a-A7	12-3a-A7-4	1	CIP	1	40	12	3a	A7	9	slow-regular	32	1	D5	0.061	0.318	68.2
12-3a-A7	12-3a-A7-4	1	CIP	0.25	10	12	3a	A7	9	slow-regular	32	1	B5	0.179	0.932	6.8
12-3a-A7	12-3a-A7-4	1	GEN	0.25	170	12	3a	A7	9	slow-regular	32	1	B5	0.185	0.755	24.5
12-3a-A7	12-3a-A7-4	1	GEN	0.5	340	12	3a	A7	9	slow-regular	32	1	G5	0.011	0.045	95.5
12-3a-A7	12-3a-A7-4	1	CIP	4	160	12	3a	A7	9	slow-regular	32	1	H5	0	0	100
12-3a-A7	12-3a-A7-4	1	DOR	0.125	6.25	12	3a	A7	9	slow-regular	32	1	E5	0.226	1.041	-4.1
12-3a-A7	12-3a-A7-5	1	GEN	0.125	85	12	3a	A7	9	slow-regular	32	1	E6	0.193	0.788	21.2
12-3a-A7	12-3a-A7-5	1	CIP	1	40	12	3a	A7	9	slow-regular	32	1	D6	0.061	0.318	68.2
12-3a-A7	12-3a-A7-5	1	DOR	0.5	25	12	3a	A7	9	slow-regular	32	1	G6	0.042	0.194	80.6
12-3a-A7	12-3a-A7-5	1	DOR	4	200	12	3a	A7	9	slow-regular	32	1	H6	0.001	0.005	99.5
12-3a-A7	12-3a-A7-5	1	DOR	0.125	6.25	12	3a	A7	9	slow-regular	32	1	E6	0.216	0.995	0.5
12-3a-A7	12-3a-A7-5	1	CEF	8	4.8	12	3a	A7	9	slow-regular	32	1	A6	0.008	0.047	95.3
12-3a-A7	12-3a-A7-5	1	CIP	8	320	12	3a	A7	9	slow-regular	32	1	A6	0.002	0.01	99
12-3a-A7	12-3a-A7-5	1	CIP	0.5	20	12	3a	A7	9	slow-regular	32	1	G6	0.129	0.672	32.8
12-3a-A7	12-3a-A7-5	1	CIP	0.25	10	12	3a	A7	9	slow-regular	32	1	B6	0.165	0.859	14.1
12-3a-A7	12-3a-A7-5	1	CEF	0.125	0.075	12	3a	A7	9	slow-regular	32	1	E6	0.192	1.116	-11.6
12-3a-A7	12-3a-A7-5	1	CAR	1	70	12	3a	A7	9	slow-regular	32	1	D6	0.072	0.371	62.9
12-3a-A7	12-3a-A7-5	1	DOR	1	50	12	3a	A7	9	slow-regular	32	1	D6	0.006	0.028	97.2
12-3a-A7	12-3a-A7-5	1	GEN	8	5440	12	3a	A7	9	slow-regular	32	1	A6	0	0	100
12-3a-A7	12-3a-A7-5	1	DOR	2	100	12	3a	A7	9	slow-regular	32	1	F6	0	0	100
12-3a-A7	12-3a-A7-5	1	GEN	1	680	12	3a	A7	9	slow-regular	32	1	D6	0.002	0.008	99.2
12-3a-A7	12-3a-A7-5	1	CAR	2	140	12	3a	A7	9	slow-regular	32	1	F6	0.04	0.206	79.4
12-3a-A7	12-3a-A7-5	1	CIP	4	160	12	3a	A7	9	slow-regular	32	1	H6	0.002	0.01	99
12-3a-A7	12-3a-A7-5	1	DOR	0	0	12	3a	A7	9	slow-regular	32	1	C6	0.221	1.018	-1.8
12-3a-A7	12-3a-A7-5	1	CAR	0.25	17.5	12	3a	A7	9	slow-regular	32	1	B6	0.175	0.902	9.8
12-3a-A7	12-3a-A7-5	1	DOR	8	400	12	3a	A7	9	slow-regular	32	1	A6	0	0	100
12-3a-A7	12-3a-A7-5	1	CIP	0	0	12	3a	A7	9	slow-regular	32	1	C6	0.179	0.932	6.8
12-3a-A7	12-3a-A7-5	1	DOR	0.25	12.5	12	3a	A7	9	slow-regular	32	1	B6	0.085	0.392	60.8
12-3a-A7	12-3a-A7-5	1	GEN	2	1360	12	3a	A7	9	slow-regular	32	1	F6	0	0	100
12-3a-A7	12-3a-A7-5	1	CEF	4	2.4	12	3a	A7	9	slow-regular	32	1	H6	0.002	0.012	98.8
12-3a-A7	12-3a-A7-5	1	CIP	0.125	5	12	3a	A7	9	slow-regular	32	1	E6	0.17	0.885	11.5
12-3a-A7	12-3a-A7-5	1	GEN	0	0	12	3a	A7	9	slow-regular	32	1	C6	0.181	0.739	26.1
12-3a-A7	12-3a-A7-5	1	GEN	4	2720	12	3a	A7	9	slow-regular	32	1	H6	0	0	100
12-3a-A7	12-3a-A7-5	1	CEF	0	0	12	3a	A7	9	slow-regular	32	1	C6	0.196	1.14	-14
12-3a-A7	12-3a-A7-5	1	CAR	0	0	12	3a	A7	9	slow-regular	32	1	C6	0.179	0.923	7.7
12-3a-A7	12-3a-A7-5	1	CEF	0.25	0.15	12	3a	A7	9	slow-regular	32	1	B6	0.151	0.878	12.2
12-3a-A7	12-3a-A7-5	1	GEN	0.5	340	12	3a	A7	9	slow-regular	32	1	G6	0.015	0.061	93.9
12-3a-A7	12-3a-A7-5	1	GEN	0.25	170	12	3a	A7	9	slow-regular	32	1	B6	0.182	0.743	25.7
12-3a-A7	12-3a-A7-5	1	CEF	1	0.6	12	3a	A7	9	slow-regular	32	1	D6	0.084	0.488	51.2
12-3a-A7	12-3a-A7-5	1	CAR	8	560	12	3a	A7	9	slow-regular	32	1	A6	0.014	0.072	92.8
12-3a-A7	12-3a-A7-5	1	CEF	0.5	0.3	12	3a	A7	9	slow-regular	32	1	G6	0.141	0.82	18
12-3a-A7	12-3a-A7-5	1	CEF	2	1.2	12	3a	A7	9	slow-regular	32	1	F6	0.01	0.058	94.2
12-3a-A7	12-3a-A7-5	1	CAR	0.5	35	12	3a	A7	9	slow-regular	32	1	G6	0.154	0.794	20.6
12-3a-A7	12-3a-A7-5	1	CAR	4	280	12	3a	A7	9	slow-regular	32	1	H6	0.015	0.077	92.3
12-3a-A7	12-3a-A7-5	1	CAR	0.125	8.75	12	3a	A7	9	slow-regular	32	1	E6	0.215	1.108	-10.8
12-3a-A7	12-3a-A7-5	1	CIP	2	80	12	3a	A7	9	slow-regular	32	1	F6	0.006	0.031	96.9
12-3a-A7	12-3a-A7-6	1	DOR	0.5	25	12	3a	A7	9	slow-regular	32	1	G7	0.044	0.203	79.7
12-3a-A7	12-3a-A7-6	1	CAR	1	70	12	3a	A7	9	slow-regular	32	1	D7	0.051	0.263	73.7
12-3a-A7	12-3a-A7-6	1	CIP	0.5	20	12	3a	A7	9	slow-regular	32	1	G7	0.115	0.599	40.1
12-3a-A7	12-3a-A7-6	1	CAR	4	280	12	3a	A7	9	slow-regular	32	1	H7	0.012	0.062	93.8
12-3a-A7	12-3a-A7-6	1	CIP	1	40	12	3a	A7	9	slow-regular	32	1	D7	0.054	0.281	71.9
12-3a-A7	12-3a-A7-6	1	CEF	4	2.4	12	3a	A7	9	slow-regular	32	1	H7	0.008	0.047	95.3
12-3a-A7	12-3a-A7-6	1	GEN	0.125	85	12	3a	A7	9	slow-regular	32	1	E7	0.185	0.755	24.5
12-3a-A7	12-3a-A7-6	1	CIP	0	0	12	3a	A7	9	slow-regular	32	1	C7	0.214	1.115	-11.5
12-3a-A7	12-3a-A7-6	1	GEN	2	1360	12	3a	A7	9	slow-regular	32	1	F7	0.001	0.004	99.6
12-3a-A7	12-3a-A7-6	1	CAR	8	560	12	3a	A7	9	slow-regular	32	1	A7	0.029	0.149	85.1
12-3a-A7	12-3a-A7-6	1	CEF	0	0	12	3a	A7	9	slow-regular	32	1	C7	0.152	0.884	11.6
12-3a-A7	12-3a-A7-6	1	GEN	0	0	12	3a	A7	9	slow-regular	32	1	C7	0.182	0.743	25.7
12-3a-A7	12-3a-A7-6	1	CIP	4	160	12	3a	A7	9	slow-regular	32	1	H7	0.002	0.01	99
12-3a-A7	12-3a-A7-6	1	DOR	0.125	6.25	12	3a	A7	9	slow-regular	32	1	E7	0.182	0.839	16.1
12-3a-A7	12-3a-A7-6	1	DOR	2	100	12	3a	A7	9	slow-regular	32	1	F7	0.004	0.018	98.2
12-3a-A7	12-3a-A7-6	1	CAR	0.25	17.5	12	3a	A7	9	slow-regular	32	1	B7	0.173	0.892	10.8
12-3a-A7	12-3a-A7-6	1	CEF	0.25	0.15	12	3a	A7	9	slow-regular	32	1	B7	0.183	1.064	-6.4
12-3a-A7	12-3a-A7-6	1	DOR	0.25	12.5	12	3a	A7	9	slow-regular	32	1	B7	0.08	0.369	63.1
12-3a-A7	12-3a-A7-6	1	DOR	0	0	12	3a	A7	9	slow-regular	32	1	C7	0.18	0.829	17.1
12-3a-A7	12-3a-A7-6	1	CEF	8	4.8	12	3a	A7	9	slow-regular	32	1	A7	0.003	0.017	98.3
12-3a-A7	12-3a-A7-6	1	GEN	1	680	12	3a	A7	9	slow-regular	32	1	D7	0.001	0.004	99.6
12-3a-A7	12-3a-A7-6	1	DOR	4	200	12	3a	A7	9	slow-regular	32	1	H7	0.003	0.014	98.6
12-3a-A7	12-3a-A7-6	1	GEN	0.25	170	12	3a	A7	9	slow-regular	32	1	B7	0.178	0.727	27.3
12-3a-A7	12-3a-A7-6	1	GEN	8	5440	12	3a	A7	9	slow-regular	32	1	A7	0.001	0.004	99.6
12-3a-A7	12-3a-A7-6	1	CAR	2	140	12	3a	A7	9	slow-regular	32	1	F7	0.019	0.098	90.2
12-3a-A7	12-3a-A7-6	1	CEF	0.125	0.075	12	3a	A7	9	slow-regular	32	1	E7	0.15	0.872	12.8
12-3a-A7	12-3a-A7-6	1	GEN	4	2720	12	3a	A7	9	slow-regular	32	1	H7	0	0	100
12-3a-A7	12-3a-A7-6	1	CAR	0.5	35	12	3a	A7	9	slow-regular	32	1	G7	0.153	0.789	21.1
12-3a-A7	12-3a-A7-6	1	DOR	8	400	12	3a	A7	9	slow-regular	32	1	A7	0.001	0.005	99.5
12-3a-A7	12-3a-A7-6	1	CIP	0.25	10	12	3a	A7	9	slow-regular	32	1	B7	0.172	0.896	10.4
12-3a-A7	12-3a-A7-6	1	DOR	1	50	12	3a	A7	9	slow-regular	32	1	D7	0.004	0.018	98.2
12-3a-A7	12-3a-A7-6	1	CIP	0.125	5	12	3a	A7	9	slow-regular	32	1	E7	0.166	0.865	13.5
12-3a-A7	12-3a-A7-6	1	CEF	0.5	0.3	12	3a	A7	9	slow-regular	32	1	G7	0.141	0.82	18
12-3a-A7	12-3a-A7-6	1	CEF	1	0.6	12	3a	A7	9	slow-regular	32	1	D7	0.062	0.36	64
12-3a-A7	12-3a-A7-6	1	CIP	2	80	12	3a	A7	9	slow-regular	32	1	F7	0.005	0.026	97.4
12-3a-A7	12-3a-A7-6	1	CEF	2	1.2	12	3a	A7	9	slow-regular	32	1	F7	0.015	0.087	91.3
12-3a-A7	12-3a-A7-6	1	CAR	0.125	8.75	12	3a	A7	9	slow-regular	32	1	E7	0.175	0.902	9.8
12-3a-A7	12-3a-A7-6	1	GEN	0.5	340	12	3a	A7	9	slow-regular	32	1	G7	0.011	0.045	95.5
12-3a-A7	12-3a-A7-6	1	CAR	0	0	12	3a	A7	9	slow-regular	32	1	C7	0.18	0.928	7.2
12-3a-A7	12-3a-A7-6	1	CIP	8	320	12	3a	A7	9	slow-regular	32	1	A7	0.001	0.005	99.5
12-3a-A7	12-3a-A7-7	1	CEF	8	4.8	12	3a	A7	9	slow-regular	32	1	A8	0.005	0.029	97.1
12-3a-A7	12-3a-A7-7	1	DOR	0.125	6.25	12	3a	A7	9	slow-regular	32	1	E8	0.184	0.848	15.2
12-3a-A7	12-3a-A7-7	1	CAR	0	0	12	3a	A7	9	slow-regular	32	1	C8	0.217	1.119	-11.9
12-3a-A7	12-3a-A7-7	1	DOR	8	400	12	3a	A7	9	slow-regular	32	1	A8	0.002	0.009	99.1
12-3a-A7	12-3a-A7-7	1	CEF	2	1.2	12	3a	A7	9	slow-regular	32	1	F8	0.013	0.076	92.4
12-3a-A7	12-3a-A7-7	1	GEN	1	680	12	3a	A7	9	slow-regular	32	1	D8	0.002	0.008	99.2
12-3a-A7	12-3a-A7-7	1	CEF	0	0	12	3a	A7	9	slow-regular	32	1	C8	0.198	1.151	-15.1
12-3a-A7	12-3a-A7-7	1	GEN	2	1360	12	3a	A7	9	slow-regular	32	1	F8	0	0	100
12-3a-A7	12-3a-A7-7	1	GEN	8	5440	12	3a	A7	9	slow-regular	32	1	A8	0	0	100
12-3a-A7	12-3a-A7-7	1	GEN	4	2720	12	3a	A7	9	slow-regular	32	1	H8	0.002	0.008	99.2
12-3a-A7	12-3a-A7-7	1	DOR	0	0	12	3a	A7	9	slow-regular	32	1	C8	0.224	1.032	-3.2
12-3a-A7	12-3a-A7-7	1	CAR	8	560	12	3a	A7	9	slow-regular	32	1	A8	0.029	0.149	85.1
12-3a-A7	12-3a-A7-7	1	CAR	0.125	8.75	12	3a	A7	9	slow-regular	32	1	E8	0.174	0.897	10.3
12-3a-A7	12-3a-A7-7	1	DOR	0.5	25	12	3a	A7	9	slow-regular	32	1	G8	0.044	0.203	79.7
12-3a-A7	12-3a-A7-7	1	CEF	0.25	0.15	12	3a	A7	9	slow-regular	32	1	B8	0.151	0.878	12.2
12-3a-A7	12-3a-A7-7	1	DOR	0.25	12.5	12	3a	A7	9	slow-regular	32	1	B8	0.085	0.392	60.8
12-3a-A7	12-3a-A7-7	1	CIP	0.125	5	12	3a	A7	9	slow-regular	32	1	E8	0.199	1.036	-3.6
12-3a-A7	12-3a-A7-7	1	CIP	0.5	20	12	3a	A7	9	slow-regular	32	1	G8	0.124	0.646	35.4
12-3a-A7	12-3a-A7-7	1	CAR	1	70	12	3a	A7	9	slow-regular	32	1	D8	0.07	0.361	63.9
12-3a-A7	12-3a-A7-7	1	CIP	4	160	12	3a	A7	9	slow-regular	32	1	H8	0	0	100
12-3a-A7	12-3a-A7-7	1	CIP	1	40	12	3a	A7	9	slow-regular	32	1	D8	0.06	0.312	68.8
12-3a-A7	12-3a-A7-7	1	CAR	0.25	17.5	12	3a	A7	9	slow-regular	32	1	B8	0.177	0.912	8.8
12-3a-A7	12-3a-A7-7	1	CIP	0	0	12	3a	A7	9	slow-regular	32	1	C8	0.221	1.151	-15.1
12-3a-A7	12-3a-A7-7	1	CAR	2	140	12	3a	A7	9	slow-regular	32	1	F8	0.018	0.093	90.7
12-3a-A7	12-3a-A7-7	1	CIP	8	320	12	3a	A7	9	slow-regular	32	1	A8	0.002	0.01	99
12-3a-A7	12-3a-A7-7	1	GEN	0.25	170	12	3a	A7	9	slow-regular	32	1	B8	0.182	0.743	25.7
12-3a-A7	12-3a-A7-7	1	CIP	2	80	12	3a	A7	9	slow-regular	32	1	F8	0.004	0.021	97.9
12-3a-A7	12-3a-A7-7	1	CEF	1	0.6	12	3a	A7	9	slow-regular	32	1	D8	0.069	0.401	59.9
12-3a-A7	12-3a-A7-7	1	CAR	0.5	35	12	3a	A7	9	slow-regular	32	1	G8	0.15	0.773	22.7
12-3a-A7	12-3a-A7-7	1	CEF	0.5	0.3	12	3a	A7	9	slow-regular	32	1	G8	0.141	0.82	18
12-3a-A7	12-3a-A7-7	1	DOR	4	200	12	3a	A7	9	slow-regular	32	1	H8	0	0	100
12-3a-A7	12-3a-A7-7	1	GEN	0.5	340	12	3a	A7	9	slow-regular	32	1	G8	0.014	0.057	94.3
12-3a-A7	12-3a-A7-7	1	CIP	0.25	10	12	3a	A7	9	slow-regular	32	1	B8	0.156	0.812	18.8
12-3a-A7	12-3a-A7-7	1	DOR	2	100	12	3a	A7	9	slow-regular	32	1	F8	0	0	100
12-3a-A7	12-3a-A7-7	1	CEF	0.125	0.075	12	3a	A7	9	slow-regular	32	1	E8	0.154	0.895	10.5
12-3a-A7	12-3a-A7-7	1	DOR	1	50	12	3a	A7	9	slow-regular	32	1	D8	0.005	0.023	97.7
12-3a-A7	12-3a-A7-7	1	CEF	4	2.4	12	3a	A7	9	slow-regular	32	1	H8	0.009	0.052	94.8
12-3a-A7	12-3a-A7-7	1	GEN	0	0	12	3a	A7	9	slow-regular	32	1	C8	0.228	0.931	6.9
12-3a-A7	12-3a-A7-7	1	CAR	4	280	12	3a	A7	9	slow-regular	32	1	H8	0.018	0.093	90.7
12-3a-A7	12-3a-A7-7	1	GEN	0.125	85	12	3a	A7	9	slow-regular	32	1	E8	0.182	0.743	25.7
12-3a-A7	12-3a-A7-8	1	CEF	0	0	12	3a	A7	9	slow-regular	32	1	C9	0.154	0.895	10.5
12-3a-A7	12-3a-A7-8	1	GEN	0.25	170	12	3a	A7	9	slow-regular	32	1	B9	0.182	0.743	25.7
12-3a-A7	12-3a-A7-8	1	GEN	0.5	340	12	3a	A7	9	slow-regular	32	1	G9	0.012	0.049	95.1
12-3a-A7	12-3a-A7-8	1	DOR	8	400	12	3a	A7	9	slow-regular	32	1	A9	0.002	0.009	99.1
12-3a-A7	12-3a-A7-8	1	DOR	4	200	12	3a	A7	9	slow-regular	32	1	H9	0	0	100
12-3a-A7	12-3a-A7-8	1	CAR	2	140	12	3a	A7	9	slow-regular	32	1	F9	0.014	0.072	92.8
12-3a-A7	12-3a-A7-8	1	CEF	0.5	0.3	12	3a	A7	9	slow-regular	32	1	G9	0.145	0.843	15.7
12-3a-A7	12-3a-A7-8	1	CAR	0.125	8.75	12	3a	A7	9	slow-regular	32	1	E9	0.211	1.088	-8.8
12-3a-A7	12-3a-A7-8	1	CAR	4	280	12	3a	A7	9	slow-regular	32	1	H9	0.018	0.093	90.7
12-3a-A7	12-3a-A7-8	1	DOR	2	100	12	3a	A7	9	slow-regular	32	1	F9	0.007	0.032	96.8
12-3a-A7	12-3a-A7-8	1	GEN	0	0	12	3a	A7	9	slow-regular	32	1	C9	0.182	0.743	25.7
12-3a-A7	12-3a-A7-8	1	CAR	0.25	17.5	12	3a	A7	9	slow-regular	32	1	B9	0.178	0.918	8.2
12-3a-A7	12-3a-A7-8	1	CEF	0.25	0.15	12	3a	A7	9	slow-regular	32	1	B9	0.152	0.884	11.6
12-3a-A7	12-3a-A7-8	1	CEF	4	2.4	12	3a	A7	9	slow-regular	32	1	H9	0.025	0.145	85.5
12-3a-A7	12-3a-A7-8	1	DOR	1	50	12	3a	A7	9	slow-regular	32	1	D9	0.026	0.12	88
12-3a-A7	12-3a-A7-8	1	CEF	0.125	0.075	12	3a	A7	9	slow-regular	32	1	E9	0.154	0.895	10.5
12-3a-A7	12-3a-A7-8	1	CIP	2	80	12	3a	A7	9	slow-regular	32	1	F9	0.005	0.026	97.4
12-3a-A7	12-3a-A7-8	1	DOR	0.5	25	12	3a	A7	9	slow-regular	32	1	G9	0.039	0.18	82
12-3a-A7	12-3a-A7-8	1	DOR	0	0	12	3a	A7	9	slow-regular	32	1	C9	0.185	0.853	14.7
12-3a-A7	12-3a-A7-8	1	CEF	8	4.8	12	3a	A7	9	slow-regular	32	1	A9	0	0	100
12-3a-A7	12-3a-A7-8	1	DOR	0.125	6.25	12	3a	A7	9	slow-regular	32	1	E9	0.184	0.848	15.2
12-3a-A7	12-3a-A7-8	1	CEF	1	0.6	12	3a	A7	9	slow-regular	32	1	D9	0.076	0.442	55.8
12-3a-A7	12-3a-A7-8	1	GEN	8	5440	12	3a	A7	9	slow-regular	32	1	A9	0	0	100
12-3a-A7	12-3a-A7-8	1	CIP	0.25	10	12	3a	A7	9	slow-regular	32	1	B9	0.176	0.917	8.3
12-3a-A7	12-3a-A7-8	1	DOR	0.25	12.5	12	3a	A7	9	slow-regular	32	1	B9	0.083	0.382	61.8
12-3a-A7	12-3a-A7-8	1	CIP	8	320	12	3a	A7	9	slow-regular	32	1	A9	0.002	0.01	99
12-3a-A7	12-3a-A7-8	1	GEN	1	680	12	3a	A7	9	slow-regular	32	1	D9	0.001	0.004	99.6
12-3a-A7	12-3a-A7-8	1	CIP	0.5	20	12	3a	A7	9	slow-regular	32	1	G9	0.121	0.63	37
12-3a-A7	12-3a-A7-8	1	CEF	2	1.2	12	3a	A7	9	slow-regular	32	1	F9	0.026	0.151	84.9
12-3a-A7	12-3a-A7-8	1	CAR	8	560	12	3a	A7	9	slow-regular	32	1	A9	0.008	0.041	95.9
12-3a-A7	12-3a-A7-8	1	GEN	4	2720	12	3a	A7	9	slow-regular	32	1	H9	0.002	0.008	99.2
12-3a-A7	12-3a-A7-8	1	CIP	1	40	12	3a	A7	9	slow-regular	32	1	D9	0.059	0.307	69.3
12-3a-A7	12-3a-A7-8	1	GEN	0.125	85	12	3a	A7	9	slow-regular	32	1	E9	0.186	0.759	24.1
12-3a-A7	12-3a-A7-8	1	CAR	1	70	12	3a	A7	9	slow-regular	32	1	D9	0.064	0.33	67
12-3a-A7	12-3a-A7-8	1	CIP	0	0	12	3a	A7	9	slow-regular	32	1	C9	0.178	0.927	7.3
12-3a-A7	12-3a-A7-8	1	CAR	0.5	35	12	3a	A7	9	slow-regular	32	1	G9	0.162	0.835	16.5
12-3a-A7	12-3a-A7-8	1	CAR	0	0	12	3a	A7	9	slow-regular	32	1	C9	0.179	0.923	7.7
12-3a-A7	12-3a-A7-8	1	CIP	4	160	12	3a	A7	9	slow-regular	32	1	H9	0	0	100
12-3a-A7	12-3a-A7-8	1	CIP	0.125	5	12	3a	A7	9	slow-regular	32	1	E9	0.17	0.885	11.5
12-3a-A7	12-3a-A7-8	1	GEN	2	1360	12	3a	A7	9	slow-regular	32	1	F9	0	0	100
12-3a-A7	12-3a-A7-9	1	CEF	4	2.4	12	3a	A7	9	slow-regular	32	1	H10	0.029	0.169	83.1
12-3a-A7	12-3a-A7-9	1	GEN	0.5	340	12	3a	A7	9	slow-regular	32	1	G10	0.017	0.069	93.1
12-3a-A7	12-3a-A7-9	1	DOR	0.5	25	12	3a	A7	9	slow-regular	32	1	G10	0.04	0.184	81.6
12-3a-A7	12-3a-A7-9	1	CAR	1	70	12	3a	A7	9	slow-regular	32	1	D10	0.065	0.335	66.5
12-3a-A7	12-3a-A7-9	1	CEF	1	0.6	12	3a	A7	9	slow-regular	32	1	D10	0.062	0.36	64
12-3a-A7	12-3a-A7-9	1	GEN	0.25	170	12	3a	A7	9	slow-regular	32	1	B10	0.183	0.747	25.3
12-3a-A7	12-3a-A7-9	1	CEF	0.125	0.075	12	3a	A7	9	slow-regular	32	1	E10	0.154	0.895	10.5
12-3a-A7	12-3a-A7-9	1	CAR	0.125	8.75	12	3a	A7	9	slow-regular	32	1	E10	0.174	0.897	10.3
12-3a-A7	12-3a-A7-9	1	CEF	0.5	0.3	12	3a	A7	9	slow-regular	32	1	G10	0.142	0.826	17.4
12-3a-A7	12-3a-A7-9	1	CAR	0.5	35	12	3a	A7	9	slow-regular	32	1	G10	0.145	0.747	25.3
12-3a-A7	12-3a-A7-9	1	CEF	2	1.2	12	3a	A7	9	slow-regular	32	1	F10	0.023	0.134	86.6
12-3a-A7	12-3a-A7-9	1	DOR	0.25	12.5	12	3a	A7	9	slow-regular	32	1	B10	0.085	0.392	60.8
12-3a-A7	12-3a-A7-9	1	DOR	2	100	12	3a	A7	9	slow-regular	32	1	F10	0	0	100
12-3a-A7	12-3a-A7-9	1	GEN	2	1360	12	3a	A7	9	slow-regular	32	1	F10	0	0	100
12-3a-A7	12-3a-A7-9	1	DOR	0	0	12	3a	A7	9	slow-regular	32	1	C10	0.228	1.051	-5.1
12-3a-A7	12-3a-A7-9	1	CIP	4	160	12	3a	A7	9	slow-regular	32	1	H10	0.002	0.01	99
12-3a-A7	12-3a-A7-9	1	GEN	0	0	12	3a	A7	9	slow-regular	32	1	C10	0.183	0.747	25.3
12-3a-A7	12-3a-A7-9	1	CIP	0.25	10	12	3a	A7	9	slow-regular	32	1	B10	0.177	0.922	7.8
12-3a-A7	12-3a-A7-9	1	CIP	1	40	12	3a	A7	9	slow-regular	32	1	D10	0.056	0.292	70.8
12-3a-A7	12-3a-A7-9	1	DOR	8	400	12	3a	A7	9	slow-regular	32	1	A10	0	0	100
12-3a-A7	12-3a-A7-9	1	GEN	0.125	85	12	3a	A7	9	slow-regular	32	1	E10	0.184	0.751	24.9
12-3a-A7	12-3a-A7-9	1	CAR	8	560	12	3a	A7	9	slow-regular	32	1	A10	0.012	0.062	93.8
12-3a-A7	12-3a-A7-9	1	CIP	0.125	5	12	3a	A7	9	slow-regular	32	1	E10	0.168	0.875	12.5
12-3a-A7	12-3a-A7-9	1	CAR	0.25	17.5	12	3a	A7	9	slow-regular	32	1	B10	0.185	0.954	4.6
12-3a-A7	12-3a-A7-9	1	CAR	4	280	12	3a	A7	9	slow-regular	32	1	H10	0.012	0.062	93.8
12-3a-A7	12-3a-A7-9	1	CAR	2	140	12	3a	A7	9	slow-regular	32	1	F10	0.017	0.088	91.2
12-3a-A7	12-3a-A7-9	1	GEN	8	5440	12	3a	A7	9	slow-regular	32	1	A10	0.002	0.008	99.2
12-3a-A7	12-3a-A7-9	1	CEF	0	0	12	3a	A7	9	slow-regular	32	1	C10	0.157	0.913	8.7
12-3a-A7	12-3a-A7-9	1	CEF	0.25	0.15	12	3a	A7	9	slow-regular	32	1	B10	0.165	0.959	4.1
12-3a-A7	12-3a-A7-9	1	CIP	2	80	12	3a	A7	9	slow-regular	32	1	F10	0.003	0.016	98.4
12-3a-A7	12-3a-A7-9	1	CIP	0	0	12	3a	A7	9	slow-regular	32	1	C10	0.176	0.917	8.3
12-3a-A7	12-3a-A7-9	1	DOR	1	50	12	3a	A7	9	slow-regular	32	1	D10	0.005	0.023	97.7
12-3a-A7	12-3a-A7-9	1	CIP	8	320	12	3a	A7	9	slow-regular	32	1	A10	0.003	0.016	98.4
12-3a-A7	12-3a-A7-9	1	DOR	0.125	6.25	12	3a	A7	9	slow-regular	32	1	E10	0.185	0.853	14.7
12-3a-A7	12-3a-A7-9	1	CAR	0	0	12	3a	A7	9	slow-regular	32	1	C10	0.181	0.933	6.7
12-3a-A7	12-3a-A7-9	1	DOR	4	200	12	3a	A7	9	slow-regular	32	1	H10	0.001	0.005	99.5
12-3a-A7	12-3a-A7-9	1	GEN	4	2720	12	3a	A7	9	slow-regular	32	1	H10	0	0	100
12-3a-A7	12-3a-A7-9	1	CEF	8	4.8	12	3a	A7	9	slow-regular	32	1	A10	0.005	0.029	97.1
12-3a-A7	12-3a-A7-9	1	CIP	0.5	20	12	3a	A7	9	slow-regular	32	1	G10	0.118	0.615	38.5
12-3a-A7	12-3a-A7-9	1	GEN	1	680	12	3a	A7	9	slow-regular	32	1	D10	0.001	0.004	99.6
12-3a-A7	12-3a-A7-anc101	anc	CAR	0.25	17.5	12	3a	A7	9	ancestor	32	1	B1	0.101	0.521	47.9
12-3a-A7	12-3a-A7-anc101	anc	CAR	8	560	12	3a	A7	9	ancestor	32	1	A1	0	0	100
12-3a-A7	12-3a-A7-anc101	anc	CEF	8	4.8	12	3a	A7	9	ancestor	32	1	A1	0.001	0.006	99.4
12-3a-A7	12-3a-A7-anc101	anc	DOR	0.125	6.25	12	3a	A7	9	ancestor	32	1	E1	0.247	1.138	-13.8
12-3a-A7	12-3a-A7-anc101	anc	DOR	2	100	12	3a	A7	9	ancestor	32	1	F1	0	0	100
12-3a-A7	12-3a-A7-anc101	anc	CEF	0.25	0.15	12	3a	A7	9	ancestor	32	1	B1	0.116	0.674	32.6
12-3a-A7	12-3a-A7-anc101	anc	GEN	0.125	85	12	3a	A7	9	ancestor	32	1	E1	0.248	1.012	-1.2
12-3a-A7	12-3a-A7-anc101	anc	GEN	8	5440	12	3a	A7	9	ancestor	32	1	A1	0	0	100
12-3a-A7	12-3a-A7-anc101	anc	DOR	0	0	12	3a	A7	9	ancestor	32	1	C1	0.195	0.899	10.1
12-3a-A7	12-3a-A7-anc101	anc	CAR	4	280	12	3a	A7	9	ancestor	32	1	H1	0.006	0.031	96.9
12-3a-A7	12-3a-A7-anc101	anc	CEF	1	0.6	12	3a	A7	9	ancestor	32	1	D1	0.006	0.035	96.5
12-3a-A7	12-3a-A7-anc101	anc	CAR	2	140	12	3a	A7	9	ancestor	32	1	F1	0.012	0.062	93.8
12-3a-A7	12-3a-A7-anc101	anc	GEN	4	2720	12	3a	A7	9	ancestor	32	1	H1	0.002	0.008	99.2
12-3a-A7	12-3a-A7-anc101	anc	CAR	0.5	35	12	3a	A7	9	ancestor	32	1	G1	0.028	0.144	85.6
12-3a-A7	12-3a-A7-anc101	anc	CAR	0	0	12	3a	A7	9	ancestor	32	1	C1	0.195	1.005	-0.5
12-3a-A7	12-3a-A7-anc101	anc	CEF	4	2.4	12	3a	A7	9	ancestor	32	1	H1	0.004	0.023	97.7
12-3a-A7	12-3a-A7-anc101	anc	DOR	4	200	12	3a	A7	9	ancestor	32	1	H1	0.001	0.005	99.5
12-3a-A7	12-3a-A7-anc101	anc	GEN	0	0	12	3a	A7	9	ancestor	32	1	C1	0.236	0.963	3.7
12-3a-A7	12-3a-A7-anc101	anc	CIP	0.5	20	12	3a	A7	9	ancestor	32	1	G1	0.072	0.375	62.5
12-3a-A7	12-3a-A7-anc101	anc	CEF	0.125	0.075	12	3a	A7	9	ancestor	32	1	E1	0.203	1.18	-18
12-3a-A7	12-3a-A7-anc101	anc	CEF	2	1.2	12	3a	A7	9	ancestor	32	1	F1	0.003	0.017	98.3
12-3a-A7	12-3a-A7-anc101	anc	CIP	1	40	12	3a	A7	9	ancestor	32	1	D1	0.02	0.104	89.6
12-3a-A7	12-3a-A7-anc101	anc	CIP	2	80	12	3a	A7	9	ancestor	32	1	F1	0.001	0.005	99.5
12-3a-A7	12-3a-A7-anc101	anc	GEN	0.25	170	12	3a	A7	9	ancestor	32	1	B1	0.197	0.804	19.6
12-3a-A7	12-3a-A7-anc101	anc	CIP	0.25	10	12	3a	A7	9	ancestor	32	1	B1	0.125	0.651	34.9
12-3a-A7	12-3a-A7-anc101	anc	CIP	0.125	5	12	3a	A7	9	ancestor	32	1	E1	0.183	0.953	4.7
12-3a-A7	12-3a-A7-anc101	anc	CIP	0	0	12	3a	A7	9	ancestor	32	1	C1	0.192	1	0
12-3a-A7	12-3a-A7-anc101	anc	DOR	0.25	12.5	12	3a	A7	9	ancestor	32	1	B1	0.051	0.235	76.5
12-3a-A7	12-3a-A7-anc101	anc	DOR	1	50	12	3a	A7	9	ancestor	32	1	D1	0.045	0.207	79.3
12-3a-A7	12-3a-A7-anc101	anc	CAR	0.125	8.75	12	3a	A7	9	ancestor	32	1	E1	0.201	1.036	-3.6
12-3a-A7	12-3a-A7-anc101	anc	DOR	8	400	12	3a	A7	9	ancestor	32	1	A1	0.001	0.005	99.5
12-3a-A7	12-3a-A7-anc101	anc	GEN	2	1360	12	3a	A7	9	ancestor	32	1	F1	0.004	0.016	98.4
12-3a-A7	12-3a-A7-anc101	anc	GEN	0.5	340	12	3a	A7	9	ancestor	32	1	G1	0.147	0.6	40
12-3a-A7	12-3a-A7-anc101	anc	GEN	1	680	12	3a	A7	9	ancestor	32	1	D1	0.002	0.008	99.2
12-3a-A7	12-3a-A7-anc101	anc	CEF	0.5	0.3	12	3a	A7	9	ancestor	32	1	G1	0.034	0.198	80.2
12-3a-A7	12-3a-A7-anc101	anc	CEF	0	0	12	3a	A7	9	ancestor	32	1	C1	0.172	1	0
12-3a-A7	12-3a-A7-anc101	anc	CIP	4	160	12	3a	A7	9	ancestor	32	1	H1	0	0	100
12-3a-A7	12-3a-A7-anc101	anc	CIP	8	320	12	3a	A7	9	ancestor	32	1	A1	0.001	0.005	99.5
12-3a-A7	12-3a-A7-anc101	anc	CAR	1	70	12	3a	A7	9	ancestor	32	1	D1	0.019	0.098	90.2
12-3a-A7	12-3a-A7-anc101	anc	DOR	0.5	25	12	3a	A7	9	ancestor	32	1	G1	0.02	0.092	90.8
12-3a-A7	12-3a-A7-anc102	anc	CIP	8	320	12	3a	A7	9	ancestor	32	1	A12	0.001	0.005	99.5
12-3a-A7	12-3a-A7-anc102	anc	CAR	2	140	12	3a	A7	9	ancestor	32	1	F12	0.014	0.072	92.8
12-3a-A7	12-3a-A7-anc102	anc	CEF	0.25	0.15	12	3a	A7	9	ancestor	32	1	B12	0.13	0.756	24.4
12-3a-A7	12-3a-A7-anc102	anc	GEN	4	2720	12	3a	A7	9	ancestor	32	1	H12	0.003	0.012	98.8
12-3a-A7	12-3a-A7-anc102	anc	GEN	1	680	12	3a	A7	9	ancestor	32	1	D12	0.002	0.008	99.2
12-3a-A7	12-3a-A7-anc102	anc	CAR	0.125	8.75	12	3a	A7	9	ancestor	32	1	E12	0.172	0.887	11.3
12-3a-A7	12-3a-A7-anc102	anc	CEF	8	4.8	12	3a	A7	9	ancestor	32	1	A12	0.002	0.012	98.8
12-3a-A7	12-3a-A7-anc102	anc	CAR	4	280	12	3a	A7	9	ancestor	32	1	H12	0.031	0.16	84
12-3a-A7	12-3a-A7-anc102	anc	CIP	0.5	20	12	3a	A7	9	ancestor	32	1	G12	0.069	0.359	64.1
12-3a-A7	12-3a-A7-anc102	anc	CEF	4	2.4	12	3a	A7	9	ancestor	32	1	H12	0.005	0.029	97.1
12-3a-A7	12-3a-A7-anc102	anc	CIP	0.25	10	12	3a	A7	9	ancestor	32	1	B12	0.116	0.604	39.6
12-3a-A7	12-3a-A7-anc102	anc	CIP	0	0	12	3a	A7	9	ancestor	32	1	C12	0.193	1.005	-0.5
12-3a-A7	12-3a-A7-anc102	anc	GEN	2	1360	12	3a	A7	9	ancestor	32	1	F12	0.006	0.024	97.6
12-3a-A7	12-3a-A7-anc102	anc	CIP	0.125	5	12	3a	A7	9	ancestor	32	1	E12	0.187	0.974	2.6
12-3a-A7	12-3a-A7-anc102	anc	DOR	0.25	12.5	12	3a	A7	9	ancestor	32	1	B12	0.06	0.276	72.4
12-3a-A7	12-3a-A7-anc102	anc	CAR	0.5	35	12	3a	A7	9	ancestor	32	1	G12	0.033	0.17	83
12-3a-A7	12-3a-A7-anc102	anc	CEF	0	0	12	3a	A7	9	ancestor	32	1	C12	0.171	0.994	0.6
12-3a-A7	12-3a-A7-anc102	anc	GEN	0.5	340	12	3a	A7	9	ancestor	32	1	G12	0.146	0.596	40.4
12-3a-A7	12-3a-A7-anc102	anc	GEN	0.25	170	12	3a	A7	9	ancestor	32	1	B12	0.199	0.812	18.8
12-3a-A7	12-3a-A7-anc102	anc	GEN	0	0	12	3a	A7	9	ancestor	32	1	C12	0.254	1.037	-3.7
12-3a-A7	12-3a-A7-anc102	anc	CEF	0.5	0.3	12	3a	A7	9	ancestor	32	1	G12	0.044	0.256	74.4
12-3a-A7	12-3a-A7-anc102	anc	GEN	0.125	85	12	3a	A7	9	ancestor	32	1	E12	0.227	0.927	7.3
12-3a-A7	12-3a-A7-anc102	anc	CAR	0.25	17.5	12	3a	A7	9	ancestor	32	1	B12	0.098	0.505	49.5
12-3a-A7	12-3a-A7-anc102	anc	CAR	8	560	12	3a	A7	9	ancestor	32	1	A12	0	0	100
12-3a-A7	12-3a-A7-anc102	anc	DOR	0	0	12	3a	A7	9	ancestor	32	1	C12	0.239	1.101	-10.1
12-3a-A7	12-3a-A7-anc102	anc	CEF	1	0.6	12	3a	A7	9	ancestor	32	1	D12	0.008	0.047	95.3
12-3a-A7	12-3a-A7-anc102	anc	CAR	0	0	12	3a	A7	9	ancestor	32	1	C12	0.194	1	0
12-3a-A7	12-3a-A7-anc102	anc	DOR	8	400	12	3a	A7	9	ancestor	32	1	A12	0.001	0.005	99.5
12-3a-A7	12-3a-A7-anc102	anc	CAR	1	70	12	3a	A7	9	ancestor	32	1	D12	0.062	0.32	68
12-3a-A7	12-3a-A7-anc102	anc	CIP	4	160	12	3a	A7	9	ancestor	32	1	H12	0.003	0.016	98.4
12-3a-A7	12-3a-A7-anc102	anc	DOR	0.125	6.25	12	3a	A7	9	ancestor	32	1	E12	0.245	1.129	-12.9
12-3a-A7	12-3a-A7-anc102	anc	CIP	2	80	12	3a	A7	9	ancestor	32	1	F12	0.001	0.005	99.5
12-3a-A7	12-3a-A7-anc102	anc	DOR	4	200	12	3a	A7	9	ancestor	32	1	H12	0.001	0.005	99.5
12-3a-A7	12-3a-A7-anc102	anc	CEF	0.125	0.075	12	3a	A7	9	ancestor	32	1	E12	0.165	0.959	4.1
12-3a-A7	12-3a-A7-anc102	anc	DOR	1	50	12	3a	A7	9	ancestor	32	1	D12	0.002	0.009	99.1
12-3a-A7	12-3a-A7-anc102	anc	GEN	8	5440	12	3a	A7	9	ancestor	32	1	A12	0	0	100
12-3a-A7	12-3a-A7-anc102	anc	CIP	1	40	12	3a	A7	9	ancestor	32	1	D12	0.015	0.078	92.2
12-3a-A7	12-3a-A7-anc102	anc	DOR	2	100	12	3a	A7	9	ancestor	32	1	F12	0	0	100
12-3a-A7	12-3a-A7-anc102	anc	CEF	2	1.2	12	3a	A7	9	ancestor	32	1	F12	0	0	100
12-3a-A7	12-3a-A7-anc102	anc	DOR	0.5	25	12	3a	A7	9	ancestor	32	1	G12	0.024	0.111	88.9
12-3a-A7	12-3a-A7-anc103	anc	CAR	0.25	17.5	12	3a	A7	9	ancestor	32	2	B1	0.105	0.469	53.1
12-3a-A7	12-3a-A7-anc103	anc	CEF	0	0	12	3a	A7	9	ancestor	32	2	C1	0.166	0.843	15.7
12-3a-A7	12-3a-A7-anc103	anc	CAR	0.125	8.75	12	3a	A7	9	ancestor	32	2	E1	0.195	0.871	12.9
12-3a-A7	12-3a-A7-anc103	anc	CAR	0	0	12	3a	A7	9	ancestor	32	2	C1	0.256	1.143	-14.3
12-3a-A7	12-3a-A7-anc103	anc	DOR	0	0	12	3a	A7	9	ancestor	32	2	C1	0.194	0.924	7.6
12-3a-A7	12-3a-A7-anc103	anc	CIP	4	160	12	3a	A7	9	ancestor	32	2	H1	0.001	0.005	99.5
12-3a-A7	12-3a-A7-anc103	anc	CIP	8	320	12	3a	A7	9	ancestor	32	2	A1	0	0	100
12-3a-A7	12-3a-A7-anc103	anc	GEN	2	1360	12	3a	A7	9	ancestor	32	2	F1	0.004	0.019	98.1
12-3a-A7	12-3a-A7-anc103	anc	CIP	0	0	12	3a	A7	9	ancestor	32	2	C1	0.19	0.984	1.6
12-3a-A7	12-3a-A7-anc103	anc	GEN	0.125	85	12	3a	A7	9	ancestor	32	2	E1	0.196	0.938	6.2
12-3a-A7	12-3a-A7-anc103	anc	DOR	8	400	12	3a	A7	9	ancestor	32	2	A1	0.002	0.01	99
12-3a-A7	12-3a-A7-anc103	anc	CIP	1	40	12	3a	A7	9	ancestor	32	2	D1	0.012	0.062	93.8
12-3a-A7	12-3a-A7-anc103	anc	CIP	0.25	10	12	3a	A7	9	ancestor	32	2	B1	0.121	0.627	37.3
12-3a-A7	12-3a-A7-anc103	anc	CEF	0.5	0.3	12	3a	A7	9	ancestor	32	2	G1	0.029	0.147	85.3
12-3a-A7	12-3a-A7-anc103	anc	CAR	4	280	12	3a	A7	9	ancestor	32	2	H1	0.026	0.116	88.4
12-3a-A7	12-3a-A7-anc103	anc	CEF	2	1.2	12	3a	A7	9	ancestor	32	2	F1	0.005	0.025	97.5
12-3a-A7	12-3a-A7-anc103	anc	CEF	4	2.4	12	3a	A7	9	ancestor	32	2	H1	0.006	0.03	97
12-3a-A7	12-3a-A7-anc103	anc	GEN	1	680	12	3a	A7	9	ancestor	32	2	D1	0.001	0.005	99.5
12-3a-A7	12-3a-A7-anc103	anc	CIP	0.5	20	12	3a	A7	9	ancestor	32	2	G1	0.054	0.28	72
12-3a-A7	12-3a-A7-anc103	anc	CEF	1	0.6	12	3a	A7	9	ancestor	32	2	D1	0	0	100
12-3a-A7	12-3a-A7-anc103	anc	CIP	2	80	12	3a	A7	9	ancestor	32	2	F1	0.002	0.01	99
12-3a-A7	12-3a-A7-anc103	anc	CEF	0.25	0.15	12	3a	A7	9	ancestor	32	2	B1	0.1	0.508	49.2
12-3a-A7	12-3a-A7-anc103	anc	CEF	0.125	0.075	12	3a	A7	9	ancestor	32	2	E1	0.157	0.797	20.3
12-3a-A7	12-3a-A7-anc103	anc	DOR	0.25	12.5	12	3a	A7	9	ancestor	32	2	B1	0.049	0.233	76.7
12-3a-A7	12-3a-A7-anc103	anc	DOR	4	200	12	3a	A7	9	ancestor	32	2	H1	0	0	100
12-3a-A7	12-3a-A7-anc103	anc	CAR	0.5	35	12	3a	A7	9	ancestor	32	2	G1	0.036	0.161	83.9
12-3a-A7	12-3a-A7-anc103	anc	CAR	8	560	12	3a	A7	9	ancestor	32	2	A1	0.001	0.004	99.6
12-3a-A7	12-3a-A7-anc103	anc	CEF	8	4.8	12	3a	A7	9	ancestor	32	2	A1	0	0	100
12-3a-A7	12-3a-A7-anc103	anc	GEN	8	5440	12	3a	A7	9	ancestor	32	2	A1	0	0	100
12-3a-A7	12-3a-A7-anc103	anc	CAR	1	70	12	3a	A7	9	ancestor	32	2	D1	0.014	0.062	93.8
12-3a-A7	12-3a-A7-anc103	anc	DOR	1	50	12	3a	A7	9	ancestor	32	2	D1	0.002	0.01	99
12-3a-A7	12-3a-A7-anc103	anc	DOR	0.125	6.25	12	3a	A7	9	ancestor	32	2	E1	0.219	1.043	-4.3
12-3a-A7	12-3a-A7-anc103	anc	DOR	2	100	12	3a	A7	9	ancestor	32	2	F1	0	0	100
12-3a-A7	12-3a-A7-anc103	anc	GEN	0.25	170	12	3a	A7	9	ancestor	32	2	B1	0.193	0.923	7.7
12-3a-A7	12-3a-A7-anc103	anc	CIP	0.125	5	12	3a	A7	9	ancestor	32	2	E1	0.158	0.819	18.1
12-3a-A7	12-3a-A7-anc103	anc	GEN	0	0	12	3a	A7	9	ancestor	32	2	C1	0.189	0.904	9.6
12-3a-A7	12-3a-A7-anc103	anc	DOR	0.5	25	12	3a	A7	9	ancestor	32	2	G1	0.021	0.1	90
12-3a-A7	12-3a-A7-anc103	anc	GEN	4	2720	12	3a	A7	9	ancestor	32	2	H1	0.002	0.01	99
12-3a-A7	12-3a-A7-anc103	anc	CAR	2	140	12	3a	A7	9	ancestor	32	2	F1	0.015	0.067	93.3
12-3a-A7	12-3a-A7-anc103	anc	GEN	0.5	340	12	3a	A7	9	ancestor	32	2	G1	0.13	0.622	37.8
12-3a-A7	12-3a-A7-anc104	anc	GEN	8	5440	12	3a	A7	9	ancestor	32	2	A12	0	0	100
12-3a-A7	12-3a-A7-anc104	anc	CIP	4	160	12	3a	A7	9	ancestor	32	2	H12	0.001	0.005	99.5
12-3a-A7	12-3a-A7-anc104	anc	CIP	0.125	5	12	3a	A7	9	ancestor	32	2	E12	0.186	0.964	3.6
12-3a-A7	12-3a-A7-anc104	anc	CEF	2	1.2	12	3a	A7	9	ancestor	32	2	F12	0.043	0.218	78.2
12-3a-A7	12-3a-A7-anc104	anc	CEF	0.25	0.15	12	3a	A7	9	ancestor	32	2	B12	0.092	0.467	53.3
12-3a-A7	12-3a-A7-anc104	anc	GEN	1	680	12	3a	A7	9	ancestor	32	2	D12	0.012	0.057	94.3
12-3a-A7	12-3a-A7-anc104	anc	CAR	0.25	17.5	12	3a	A7	9	ancestor	32	2	B12	0.107	0.478	52.2
12-3a-A7	12-3a-A7-anc104	anc	CEF	8	4.8	12	3a	A7	9	ancestor	32	2	A12	0	0	100
12-3a-A7	12-3a-A7-anc104	anc	CIP	0	0	12	3a	A7	9	ancestor	32	2	C12	0.196	1.016	-1.6
12-3a-A7	12-3a-A7-anc104	anc	CIP	0.5	20	12	3a	A7	9	ancestor	32	2	G12	0.062	0.321	67.9
12-3a-A7	12-3a-A7-anc104	anc	CEF	0.5	0.3	12	3a	A7	9	ancestor	32	2	G12	0.043	0.218	78.2
12-3a-A7	12-3a-A7-anc104	anc	CIP	2	80	12	3a	A7	9	ancestor	32	2	F12	0.002	0.01	99
12-3a-A7	12-3a-A7-anc104	anc	DOR	1	50	12	3a	A7	9	ancestor	32	2	D12	0.003	0.014	98.6
12-3a-A7	12-3a-A7-anc104	anc	DOR	0.25	12.5	12	3a	A7	9	ancestor	32	2	B12	0.043	0.205	79.5
12-3a-A7	12-3a-A7-anc104	anc	CAR	8	560	12	3a	A7	9	ancestor	32	2	A12	0	0	100
12-3a-A7	12-3a-A7-anc104	anc	CEF	0.125	0.075	12	3a	A7	9	ancestor	32	2	E12	0.17	0.863	13.7
12-3a-A7	12-3a-A7-anc104	anc	CAR	4	280	12	3a	A7	9	ancestor	32	2	H12	0.005	0.022	97.8
12-3a-A7	12-3a-A7-anc104	anc	CAR	0	0	12	3a	A7	9	ancestor	32	2	C12	0.193	0.862	13.8
12-3a-A7	12-3a-A7-anc104	anc	GEN	4	2720	12	3a	A7	9	ancestor	32	2	H12	0.003	0.014	98.6
12-3a-A7	12-3a-A7-anc104	anc	CEF	4	2.4	12	3a	A7	9	ancestor	32	2	H12	0.003	0.015	98.5
12-3a-A7	12-3a-A7-anc104	anc	CAR	0.5	35	12	3a	A7	9	ancestor	32	2	G12	0.022	0.098	90.2
12-3a-A7	12-3a-A7-anc104	anc	CIP	0.25	10	12	3a	A7	9	ancestor	32	2	B12	0.123	0.637	36.3
12-3a-A7	12-3a-A7-anc104	anc	CIP	8	320	12	3a	A7	9	ancestor	32	2	A12	0	0	100
12-3a-A7	12-3a-A7-anc104	anc	GEN	0.5	340	12	3a	A7	9	ancestor	32	2	G12	0.147	0.703	29.7
12-3a-A7	12-3a-A7-anc104	anc	CIP	1	40	12	3a	A7	9	ancestor	32	2	D12	0.018	0.093	90.7
12-3a-A7	12-3a-A7-anc104	anc	CEF	1	0.6	12	3a	A7	9	ancestor	32	2	D12	0.009	0.046	95.4
12-3a-A7	12-3a-A7-anc104	anc	CAR	0.125	8.75	12	3a	A7	9	ancestor	32	2	E12	0.166	0.741	25.9
12-3a-A7	12-3a-A7-anc104	anc	GEN	0.25	170	12	3a	A7	9	ancestor	32	2	B12	0.23	1.1	-10
12-3a-A7	12-3a-A7-anc104	anc	GEN	2	1360	12	3a	A7	9	ancestor	32	2	F12	0	0	100
12-3a-A7	12-3a-A7-anc104	anc	DOR	2	100	12	3a	A7	9	ancestor	32	2	F12	0.022	0.105	89.5
12-3a-A7	12-3a-A7-anc104	anc	DOR	0	0	12	3a	A7	9	ancestor	32	2	C12	0.225	1.071	-7.1
12-3a-A7	12-3a-A7-anc104	anc	DOR	8	400	12	3a	A7	9	ancestor	32	2	A12	0.002	0.01	99
12-3a-A7	12-3a-A7-anc104	anc	CEF	0	0	12	3a	A7	9	ancestor	32	2	C12	0.228	1.157	-15.7
12-3a-A7	12-3a-A7-anc104	anc	DOR	0.125	6.25	12	3a	A7	9	ancestor	32	2	E12	0.198	0.943	5.7
12-3a-A7	12-3a-A7-anc104	anc	GEN	0	0	12	3a	A7	9	ancestor	32	2	C12	0.229	1.096	-9.6
12-3a-A7	12-3a-A7-anc104	anc	GEN	0.125	85	12	3a	A7	9	ancestor	32	2	E12	0.197	0.943	5.7
12-3a-A7	12-3a-A7-anc104	anc	DOR	0.5	25	12	3a	A7	9	ancestor	32	2	G12	0.02	0.095	90.5
12-3a-A7	12-3a-A7-anc104	anc	DOR	4	200	12	3a	A7	9	ancestor	32	2	H12	0.001	0.005	99.5
12-3a-A7	12-3a-A7-anc104	anc	CAR	2	140	12	3a	A7	9	ancestor	32	2	F12	0.014	0.062	93.8
12-3a-A7	12-3a-A7-anc104	anc	CAR	1	70	12	3a	A7	9	ancestor	32	2	D12	0.039	0.174	82.6
12-3a-B1	12-3a-B1-1	1	CEF	1	0.6	12	3a	B1	2	mono	19	1	D2	0.027	0.154	84.6
12-3a-B1	12-3a-B1-1	1	GEN	0	0	12	3a	B1	2	mono	19	1	C2	0.241	1.095	-9.5
12-3a-B1	12-3a-B1-1	1	CAR	0	0	12	3a	B1	2	mono	19	1	C2	0.192	0.861	13.9
12-3a-B1	12-3a-B1-1	1	CEF	2	1.2	12	3a	B1	2	mono	19	1	F2	0.045	0.257	74.3
12-3a-B1	12-3a-B1-1	1	CEF	0.125	0.075	12	3a	B1	2	mono	19	1	E2	0.156	0.891	10.9
12-3a-B1	12-3a-B1-1	1	GEN	4	2720	12	3a	B1	2	mono	19	1	H2	0.001	0.005	99.5
12-3a-B1	12-3a-B1-1	1	DOR	4	200	12	3a	B1	2	mono	39	1	H2	0.021	0.092	90.8
12-3a-B1	12-3a-B1-1	1	CIP	8	320	12	3a	B1	2	mono	19	1	A2	0.001	0.005	99.5
12-3a-B1	12-3a-B1-1	1	GEN	0.125	85	12	3a	B1	2	mono	19	1	E2	0.195	0.886	11.4
12-3a-B1	12-3a-B1-1	1	DOR	0.125	6.25	12	3a	B1	2	mono	39	1	E2	0.244	1.07	-7
12-3a-B1	12-3a-B1-1	1	DOR	0.25	12.5	12	3a	B1	2	mono	39	1	B2	0.258	1.132	-13.2
12-3a-B1	12-3a-B1-1	1	CEF	0	0	12	3a	B1	2	mono	19	1	C2	0.16	0.914	8.6
12-3a-B1	12-3a-B1-1	1	GEN	0.25	170	12	3a	B1	2	mono	19	1	B2	0.236	1.073	-7.3
12-3a-B1	12-3a-B1-1	1	CIP	1	40	12	3a	B1	2	mono	19	1	D2	0.023	0.111	88.9
12-3a-B1	12-3a-B1-1	1	CAR	0.25	17.5	12	3a	B1	2	mono	19	1	B2	0.086	0.386	61.4
12-3a-B1	12-3a-B1-1	1	CIP	0	0	12	3a	B1	2	mono	19	1	C2	0.193	0.928	7.2
12-3a-B1	12-3a-B1-1	1	CIP	4	160	12	3a	B1	2	mono	19	1	H2	0.002	0.01	99
12-3a-B1	12-3a-B1-1	1	CAR	8	560	12	3a	B1	2	mono	19	1	A2	0.001	0.004	99.6
12-3a-B1	12-3a-B1-1	1	CAR	0.125	8.75	12	3a	B1	2	mono	19	1	E2	0.147	0.659	34.1
12-3a-B1	12-3a-B1-1	1	DOR	2	100	12	3a	B1	2	mono	39	1	F2	0.002	0.009	99.1
12-3a-B1	12-3a-B1-1	1	CEF	8	4.8	12	3a	B1	2	mono	19	1	A2	0.004	0.023	97.7
12-3a-B1	12-3a-B1-1	1	DOR	0	0	12	3a	B1	2	mono	39	1	C2	0.231	1.013	-1.3
12-3a-B1	12-3a-B1-1	1	GEN	0.5	340	12	3a	B1	2	mono	19	1	G2	0.155	0.705	29.5
12-3a-B1	12-3a-B1-1	1	CEF	0.5	0.3	12	3a	B1	2	mono	19	1	G2	0.025	0.143	85.7
12-3a-B1	12-3a-B1-1	1	CAR	1	70	12	3a	B1	2	mono	19	1	D2	0.021	0.094	90.6
12-3a-B1	12-3a-B1-1	1	CEF	4	2.4	12	3a	B1	2	mono	19	1	H2	0.01	0.057	94.3
12-3a-B1	12-3a-B1-1	1	GEN	2	1360	12	3a	B1	2	mono	19	1	F2	0	0	100
12-3a-B1	12-3a-B1-1	1	CAR	4	280	12	3a	B1	2	mono	19	1	H2	0.01	0.045	95.5
12-3a-B1	12-3a-B1-1	1	CAR	0.5	35	12	3a	B1	2	mono	19	1	G2	0.027	0.121	87.9
12-3a-B1	12-3a-B1-1	1	CIP	2	80	12	3a	B1	2	mono	19	1	F2	0	0	100
12-3a-B1	12-3a-B1-1	1	CAR	2	140	12	3a	B1	2	mono	19	1	F2	0.012	0.054	94.6
12-3a-B1	12-3a-B1-1	1	GEN	8	5440	12	3a	B1	2	mono	19	1	A2	0	0	100
12-3a-B1	12-3a-B1-1	1	DOR	1	50	12	3a	B1	2	mono	39	1	D2	0.057	0.25	75
12-3a-B1	12-3a-B1-1	1	DOR	8	400	12	3a	B1	2	mono	39	1	A2	0.028	0.123	87.7
12-3a-B1	12-3a-B1-1	1	CEF	0.25	0.15	12	3a	B1	2	mono	19	1	B2	0.122	0.697	30.3
12-3a-B1	12-3a-B1-1	1	CIP	0.125	5	12	3a	B1	2	mono	19	1	E2	0.164	0.788	21.2
12-3a-B1	12-3a-B1-1	1	DOR	0.5	25	12	3a	B1	2	mono	39	1	G2	0.084	0.368	63.2
12-3a-B1	12-3a-B1-1	1	CIP	0.25	10	12	3a	B1	2	mono	19	1	B2	0.134	0.644	35.6
12-3a-B1	12-3a-B1-1	1	GEN	1	680	12	3a	B1	2	mono	19	1	D2	0.002	0.009	99.1
12-3a-B1	12-3a-B1-1	1	CIP	0.5	20	12	3a	B1	2	mono	19	1	G2	0.08	0.385	61.5
12-3a-B1	12-3a-B1-10	1	GEN	0.125	85	12	3a	B1	2	mono	19	1	E11	0.253	1.15	-15
12-3a-B1	12-3a-B1-10	1	CIP	0.25	10	12	3a	B1	2	mono	19	1	B11	0.127	0.611	38.9
12-3a-B1	12-3a-B1-10	1	CAR	2	140	12	3a	B1	2	mono	19	1	F11	0.028	0.126	87.4
12-3a-B1	12-3a-B1-10	1	DOR	8	400	12	3a	B1	2	mono	39	1	A11	0.018	0.079	92.1
12-3a-B1	12-3a-B1-10	1	CIP	0	0	12	3a	B1	2	mono	19	1	C11	0.196	0.942	5.8
12-3a-B1	12-3a-B1-10	1	DOR	4	200	12	3a	B1	2	mono	39	1	H11	0.004	0.018	98.2
12-3a-B1	12-3a-B1-10	1	CAR	8	560	12	3a	B1	2	mono	19	1	A11	0.001	0.004	99.6
12-3a-B1	12-3a-B1-10	1	CIP	8	320	12	3a	B1	2	mono	19	1	A11	0.002	0.01	99
12-3a-B1	12-3a-B1-10	1	GEN	0	0	12	3a	B1	2	mono	19	1	C11	0.254	1.155	-15.5
12-3a-B1	12-3a-B1-10	1	CIP	0.5	20	12	3a	B1	2	mono	19	1	G11	0.079	0.38	62
12-3a-B1	12-3a-B1-10	1	GEN	4	2720	12	3a	B1	2	mono	19	1	H11	0.002	0.009	99.1
12-3a-B1	12-3a-B1-10	1	CEF	8	4.8	12	3a	B1	2	mono	19	1	A11	0.04	0.229	77.1
12-3a-B1	12-3a-B1-10	1	CAR	0.5	35	12	3a	B1	2	mono	19	1	G11	0.019	0.085	91.5
12-3a-B1	12-3a-B1-10	1	CAR	0.125	8.75	12	3a	B1	2	mono	19	1	E11	0.168	0.753	24.7
12-3a-B1	12-3a-B1-10	1	GEN	1	680	12	3a	B1	2	mono	19	1	D11	0.001	0.005	99.5
12-3a-B1	12-3a-B1-10	1	GEN	0.5	340	12	3a	B1	2	mono	19	1	G11	0.141	0.641	35.9
12-3a-B1	12-3a-B1-10	1	CIP	0.125	5	12	3a	B1	2	mono	19	1	E11	0.184	0.885	11.5
12-3a-B1	12-3a-B1-10	1	DOR	0.5	25	12	3a	B1	2	mono	39	1	G11	0.08	0.351	64.9
12-3a-B1	12-3a-B1-10	1	CEF	0.125	0.075	12	3a	B1	2	mono	19	1	E11	0.174	0.994	0.6
12-3a-B1	12-3a-B1-10	1	CEF	4	2.4	12	3a	B1	2	mono	19	1	H11	0.01	0.057	94.3
12-3a-B1	12-3a-B1-10	1	CEF	0.5	0.3	12	3a	B1	2	mono	19	1	G11	0.025	0.143	85.7
12-3a-B1	12-3a-B1-10	1	DOR	0	0	12	3a	B1	2	mono	39	1	C11	0.195	0.855	14.5
12-3a-B1	12-3a-B1-10	1	DOR	2	100	12	3a	B1	2	mono	39	1	F11	0	0	100
12-3a-B1	12-3a-B1-10	1	DOR	1	50	12	3a	B1	2	mono	39	1	D11	0.047	0.206	79.4
12-3a-B1	12-3a-B1-10	1	DOR	0.125	6.25	12	3a	B1	2	mono	39	1	E11	0.2	0.877	12.3
12-3a-B1	12-3a-B1-10	1	CEF	0.25	0.15	12	3a	B1	2	mono	19	1	B11	0.12	0.686	31.4
12-3a-B1	12-3a-B1-10	1	GEN	0.25	170	12	3a	B1	2	mono	19	1	B11	0.2	0.909	9.1
12-3a-B1	12-3a-B1-10	1	CAR	0	0	12	3a	B1	2	mono	19	1	C11	0.198	0.888	11.2
12-3a-B1	12-3a-B1-10	1	CIP	1	40	12	3a	B1	2	mono	19	1	D11	0.026	0.125	87.5
12-3a-B1	12-3a-B1-10	1	GEN	8	5440	12	3a	B1	2	mono	19	1	A11	0.001	0.005	99.5
12-3a-B1	12-3a-B1-10	1	DOR	0.25	12.5	12	3a	B1	2	mono	39	1	B11	0.198	0.868	13.2
12-3a-B1	12-3a-B1-10	1	CAR	1	70	12	3a	B1	2	mono	19	1	D11	0.021	0.094	90.6
12-3a-B1	12-3a-B1-10	1	CEF	1	0.6	12	3a	B1	2	mono	19	1	D11	0.002	0.011	98.9
12-3a-B1	12-3a-B1-10	1	CIP	2	80	12	3a	B1	2	mono	19	1	F11	0.002	0.01	99
12-3a-B1	12-3a-B1-10	1	CEF	0	0	12	3a	B1	2	mono	19	1	C11	0.215	1.229	-22.9
12-3a-B1	12-3a-B1-10	1	CAR	4	280	12	3a	B1	2	mono	19	1	H11	0.012	0.054	94.6
12-3a-B1	12-3a-B1-10	1	GEN	2	1360	12	3a	B1	2	mono	19	1	F11	0.001	0.005	99.5
12-3a-B1	12-3a-B1-10	1	CIP	4	160	12	3a	B1	2	mono	19	1	H11	0.002	0.01	99
12-3a-B1	12-3a-B1-10	1	CAR	0.25	17.5	12	3a	B1	2	mono	19	1	B11	0.105	0.471	52.9
[truncated: 30,561 more rows]
