# Supplementary material for: High potency of sequential therapy with only β-lactam antibiotics
Source: eLife. 2021 Jul 28;10:e68876. doi: 10.7554/eLife.68876 (PMC8456660; doi:10.7554/eLife.68876)
Supplement: Figure 2—figure supplement 3—source data 1. [file elife-68876-fig2-figsupp3-data1.xlsx]

## Sheet: Figure 2 - Figure Supplement 3
isolate	ab	rel_od_total	mic
12-3a-A1-1	CAR	0.716	2
12-3a-A1-10	CAR	0.771	8
12-3a-A1-11	CAR	0.583	4
12-3a-A1-12	CAR	0.429	2
12-3a-A1-13	CAR	0.331	2
12-3a-A1-14	CAR	0.511	4
12-3a-A1-15	CAR	0.606	4
12-3a-A1-16	CAR	0.484	4
12-3a-A1-17	CAR	0.202	4
12-3a-A1-18	CAR	0.653	4
12-3a-A1-19	CAR	0.49	4
12-3a-A1-2	CAR	0.716	4
12-3a-A1-20	CAR	0.481	4
12-3a-A1-3	CAR	0.695	4
12-3a-A1-4	CAR	0.754	8
12-3a-A1-5	CAR	0.873	4
12-3a-A1-6	CAR	0.627	4
12-3a-A1-7	CAR	0.745	4
12-3a-A1-8	CAR	0.679	4
12-3a-A1-9	CAR	0.577	2
12-3a-A1-1	CEF	0.412	2
12-3a-A1-10	CEF	0.366	2
12-3a-A1-11	CEF	0.405	2
12-3a-A1-12	CEF	0.259	2
12-3a-A1-13	CEF	0.286	2
12-3a-A1-14	CEF	0.527	2
12-3a-A1-15	CEF	0.708	2
12-3a-A1-16	CEF	0.369	2
12-3a-A1-17	CEF	0.473	4
12-3a-A1-18	CEF	0.625	2
12-3a-A1-19	CEF	0.419	2
12-3a-A1-2	CEF	0.569	2
12-3a-A1-20	CEF	0.504	2
12-3a-A1-3	CEF	0.507	2
12-3a-A1-4	CEF	0.53	2
12-3a-A1-5	CEF	0.718	2
12-3a-A1-6	CEF	0.532	2
12-3a-A1-7	CEF	0.438	2
12-3a-A1-8	CEF	0.489	2
12-3a-A1-9	CEF	0.321	2
12-3a-A1-1	CIP	0.307	2
12-3a-A1-10	CIP	0.389	2
12-3a-A1-11	CIP	0.104	2
12-3a-A1-12	CIP	0.047	2
12-3a-A1-13	CIP	0.064	2
12-3a-A1-14	CIP	0.022	2
12-3a-A1-15	CIP	0.122	2
12-3a-A1-16	CIP	0.012	2
12-3a-A1-17	CIP	0.081	4
12-3a-A1-18	CIP	0.085	2
12-3a-A1-19	CIP	-0.01	2
12-3a-A1-2	CIP	0.375	4
12-3a-A1-20	CIP	0.059	2
12-3a-A1-3	CIP	0.336	2
12-3a-A1-4	CIP	0.412	4
12-3a-A1-5	CIP	0.304	2
12-3a-A1-6	CIP	0.249	2
12-3a-A1-7	CIP	0.309	2
12-3a-A1-8	CIP	0.204	2
12-3a-A1-9	CIP	0.315	2
12-3a-A1-1	DOR	-0.06	4
12-3a-A1-10	DOR	-0.137	2
12-3a-A1-11	DOR	0.023	2
12-3a-A1-12	DOR	-0.043	2
12-3a-A1-13	DOR	0.095	2
12-3a-A1-14	DOR	0.033	2
12-3a-A1-15	DOR	-0.009	2
12-3a-A1-16	DOR	-0.029	2
12-3a-A1-17	DOR	0.438	16
12-3a-A1-18	DOR	0.148	2
12-3a-A1-19	DOR	0.037	2
12-3a-A1-2	DOR	-0.072	2
12-3a-A1-20	DOR	0.006	2
12-3a-A1-3	DOR	0.102	2
12-3a-A1-4	DOR	-0.132	2
12-3a-A1-5	DOR	0.035	4
12-3a-A1-6	DOR	-0.056	2
12-3a-A1-7	DOR	0.07	4
12-3a-A1-8	DOR	0.059	2
12-3a-A1-9	DOR	-0.053	2
12-3a-A1-1	GEN	-0.152	1
12-3a-A1-10	GEN	-0.151	1
12-3a-A1-11	GEN	-0.134	1
12-3a-A1-12	GEN	-0.238	1
12-3a-A1-13	GEN	-0.221	1
12-3a-A1-14	GEN	-0.187	1
12-3a-A1-15	GEN	-0.097	1
12-3a-A1-16	GEN	-0.228	1
12-3a-A1-17	GEN	-0.031	2
12-3a-A1-18	GEN	-0.185	1
12-3a-A1-19	GEN	-0.221	1
12-3a-A1-2	GEN	-0.181	1
12-3a-A1-20	GEN	-0.215	1
12-3a-A1-3	GEN	-0.178	1
12-3a-A1-4	GEN	-0.159	1
12-3a-A1-5	GEN	-0.126	1
12-3a-A1-6	GEN	-0.156	1
12-3a-A1-7	GEN	-0.107	1
12-3a-A1-8	GEN	-0.237	1
12-3a-A1-9	GEN	-0.238	1
12-3a-A7-1	CAR	0.439	2
12-3a-A7-10	CAR	0.355	2
12-3a-A7-11	CAR	0.486	2
12-3a-A7-12	CAR	0.313	2
12-3a-A7-13	CAR	0.399	2
12-3a-A7-14	CAR	0.392	2
12-3a-A7-15	CAR	0.474	2
12-3a-A7-16	CAR	0.385	2
12-3a-A7-17	CAR	-0.832	0.125
12-3a-A7-18	CAR	0.399	2
12-3a-A7-19	CAR	0.353	2
12-3a-A7-2	CAR	0.439	2
12-3a-A7-20	CAR	0.337	2
12-3a-A7-3	CAR	0.431	2
12-3a-A7-4	CAR	0.396	2
12-3a-A7-5	CAR	0.482	4
12-3a-A7-6	CAR	0.358	2
12-3a-A7-7	CAR	0.463	2
12-3a-A7-8	CAR	0.431	2
12-3a-A7-9	CAR	0.357	2
12-3a-A7-1	CEF	0.462	2
12-3a-A7-10	CEF	0.504	2
12-3a-A7-11	CEF	0.443	2
12-3a-A7-12	CEF	0.394	2
12-3a-A7-13	CEF	0.466	2
12-3a-A7-14	CEF	0.409	2
12-3a-A7-15	CEF	0.34	2
12-3a-A7-16	CEF	0.232	2
12-3a-A7-17	CEF	-0.606	0.125
12-3a-A7-18	CEF	0.316	2
12-3a-A7-19	CEF	0.291	2
12-3a-A7-2	CEF	0.408	8
12-3a-A7-20	CEF	0.399	2
12-3a-A7-3	CEF	0.479	2
12-3a-A7-4	CEF	0.555	2
12-3a-A7-5	CEF	0.474	2
12-3a-A7-6	CEF	0.342	2
12-3a-A7-7	CEF	0.391	2
12-3a-A7-8	CEF	0.376	8
12-3a-A7-9	CEF	0.385	8
12-3a-A7-1	CIP	0.205	2
12-3a-A7-10	CIP	0.204	2
12-3a-A7-11	CIP	0.27	2
12-3a-A7-12	CIP	0.261	2
12-3a-A7-13	CIP	0.252	2
12-3a-A7-14	CIP	0.211	2
12-3a-A7-15	CIP	0.242	2
12-3a-A7-16	CIP	0.179	2
12-3a-A7-17	CIP	-0.817	0.25
12-3a-A7-18	CIP	0.202	2
12-3a-A7-19	CIP	0.211	2
12-3a-A7-2	CIP	0.231	2
12-3a-A7-20	CIP	0.206	2
12-3a-A7-3	CIP	0.197	2
12-3a-A7-4	CIP	0.238	2
12-3a-A7-5	CIP	0.212	2
12-3a-A7-6	CIP	0.238	2
12-3a-A7-7	CIP	0.301	2
12-3a-A7-8	CIP	0.207	2
12-3a-A7-9	CIP	0.194	2
12-3a-A7-1	DOR	0.053	1
12-3a-A7-10	DOR	-0.092	1
12-3a-A7-11	DOR	0.066	1
12-3a-A7-12	DOR	0.022	1
12-3a-A7-13	DOR	0.084	1
12-3a-A7-14	DOR	0.108	1
12-3a-A7-15	DOR	0.078	1
12-3a-A7-16	DOR	0.144	1
12-3a-A7-17	DOR	-0.704	0.25
12-3a-A7-18	DOR	-0.078	1
12-3a-A7-19	DOR	0	1
12-3a-A7-2	DOR	-0.021	1
12-3a-A7-20	DOR	0.072	1
12-3a-A7-3	DOR	-0.092	1
12-3a-A7-4	DOR	0	1
12-3a-A7-5	DOR	0.009	1
12-3a-A7-6	DOR	-0.12	1
12-3a-A7-7	DOR	-0.039	1
12-3a-A7-8	DOR	-0.071	2
12-3a-A7-9	DOR	-0.039	1
12-3a-A7-1	GEN	-0.264	0.5
12-3a-A7-10	GEN	-0.297	0.5
12-3a-A7-11	GEN	-0.117	1
12-3a-A7-12	GEN	-0.174	1
12-3a-A7-13	GEN	-0.149	1
12-3a-A7-14	GEN	-0.179	1
12-3a-A7-15	GEN	-0.192	1
12-3a-A7-16	GEN	-0.239	1
12-3a-A7-17	GEN	-0.833	0.25
12-3a-A7-18	GEN	-0.228	0.5
12-3a-A7-19	GEN	-0.238	0.5
12-3a-A7-2	GEN	-0.305	0.5
12-3a-A7-20	GEN	-0.234	1
12-3a-A7-3	GEN	-0.316	0.5
12-3a-A7-4	GEN	-0.309	0.5
12-3a-A7-5	GEN	-0.315	0.5
12-3a-A7-6	GEN	-0.331	0.5
12-3a-A7-7	GEN	-0.27	0.5
12-3a-A7-8	GEN	-0.324	0.5
12-3a-A7-9	GEN	-0.318	0.5
12-3a-B1-1	CAR	-0.158	1
12-3a-B1-10	CAR	-0.063	0.5
12-3a-B1-11	CAR	-0.073	0.5
12-3a-B1-12	CAR	0.022	1
12-3a-B1-13	CAR	0.095	8
12-3a-B1-14	CAR	0.024	2
12-3a-B1-15	CAR	0.073	0.5
12-3a-B1-16	CAR	0.103	1
12-3a-B1-17	CAR	-0.054	1
12-3a-B1-18	CAR	0.093	8
12-3a-B1-19	CAR	-0.051	0.5
12-3a-B1-2	CAR	-0.149	0.5
12-3a-B1-20	CAR	0.025	1
12-3a-B1-3	CAR	-0.146	1
12-3a-B1-4	CAR	-0.146	0.5
12-3a-B1-5	CAR	-0.003	2
12-3a-B1-6	CAR	-0.122	1
12-3a-B1-7	CAR	0.075	1
12-3a-B1-8	CAR	-0.085	1
12-3a-B1-9	CAR	-0.051	1
12-3a-B1-1	CEF	0.089	4
12-3a-B1-10	CEF	0.175	1
12-3a-B1-11	CEF	0	1
12-3a-B1-12	CEF	0.149	2
12-3a-B1-13	CEF	-0.008	2
12-3a-B1-14	CEF	0.081	1
12-3a-B1-15	CEF	-0.008	1
12-3a-B1-16	CEF	-0.045	1
12-3a-B1-17	CEF	0.039	1
12-3a-B1-18	CEF	-0.016	1
12-3a-B1-19	CEF	-0.058	1
12-3a-B1-2	CEF	-0.028	1
12-3a-B1-20	CEF	-0.033	1
12-3a-B1-3	CEF	0.067	0.5
12-3a-B1-4	CEF	0.006	1
12-3a-B1-5	CEF	-0.044	1
12-3a-B1-6	CEF	0.079	1
12-3a-B1-7	CEF	0.071	1
12-3a-B1-8	CEF	0.097	2
12-3a-B1-9	CEF	0.099	4
12-3a-B1-1	CIP	-0.018	2
12-3a-B1-10	CIP	0.016	2
12-3a-B1-11	CIP	-0.023	2
12-3a-B1-12	CIP	-0.095	2
12-3a-B1-13	CIP	-0.123	1
12-3a-B1-14	CIP	-0.087	2
12-3a-B1-15	CIP	-0.022	2
12-3a-B1-16	CIP	-0.037	1
12-3a-B1-17	CIP	-0.016	2
12-3a-B1-18	CIP	-0.062	1
12-3a-B1-19	CIP	-0.05	1
12-3a-B1-2	CIP	-0.02	2
12-3a-B1-20	CIP	-0.071	2
12-3a-B1-3	CIP	-0.035	1
12-3a-B1-4	CIP	-0.015	2
12-3a-B1-5	CIP	-0.01	2
12-3a-B1-6	CIP	-0.041	1
12-3a-B1-7	CIP	0	2
12-3a-B1-8	CIP	0.01	2
12-3a-B1-9	CIP	-0.039	1
12-3a-B1-1	DOR	0.056	2
12-3a-B1-10	DOR	-0.153	2
12-3a-B1-11	DOR	-0.045	2
12-3a-B1-12	DOR	-0.017	4
12-3a-B1-13	DOR	-0.203	2
12-3a-B1-14	DOR	-0.084	2
12-3a-B1-15	DOR	-0.083	2
12-3a-B1-16	DOR	-0.072	2
12-3a-B1-17	DOR	0.017	2
12-3a-B1-18	DOR	-0.116	2
12-3a-B1-19	DOR	-0.061	2
12-3a-B1-2	DOR	-0.072	2
12-3a-B1-20	DOR	-0.056	2
12-3a-B1-3	DOR	-0.104	4
12-3a-B1-4	DOR	-0.094	4
12-3a-B1-5	DOR	0.021	4
12-3a-B1-6	DOR	0.083	4
12-3a-B1-7	DOR	-0.074	2
12-3a-B1-8	DOR	0.015	2
12-3a-B1-9	DOR	-0.154	2
12-3a-B1-1	GEN	0.005	1
12-3a-B1-10	GEN	0.033	1
12-3a-B1-11	GEN	0.092	4
12-3a-B1-12	GEN	-0.087	1
12-3a-B1-13	GEN	-0.077	1
12-3a-B1-14	GEN	0	1
12-3a-B1-15	GEN	-0.037	2
12-3a-B1-16	GEN	-0.07	1
12-3a-B1-17	GEN	-0.039	1
12-3a-B1-18	GEN	-0.099	1
12-3a-B1-19	GEN	-0.103	1
12-3a-B1-2	GEN	-0.052	2
12-3a-B1-20	GEN	-0.033	1
12-3a-B1-3	GEN	-0.084	1
12-3a-B1-4	GEN	-0.073	1
12-3a-B1-5	GEN	-0.079	1
12-3a-B1-6	GEN	-0.079	1
12-3a-B1-7	GEN	-0.116	1
12-3a-B1-8	GEN	-0.114	1
12-3a-B1-9	GEN	-0.082	1
12-3a-B7-1	CAR	0.391	2
12-3a-B7-10	CAR	0.389	2
12-3a-B7-11	CAR	0.199	2
12-3a-B7-12	CAR	0.237	2
12-3a-B7-13	CAR	0.302	2
12-3a-B7-14	CAR	0.342	2
12-3a-B7-15	CAR	0.278	2
12-3a-B7-16	CAR	0.267	2
12-3a-B7-17	CAR	0.242	2
12-3a-B7-18	CAR	0.32	2
12-3a-B7-19	CAR	0.34	2
12-3a-B7-2	CAR	0.393	2
12-3a-B7-20	CAR	0.283	2
12-3a-B7-3	CAR	0.314	2
12-3a-B7-4	CAR	0.353	2
12-3a-B7-5	CAR	0.427	2
12-3a-B7-6	CAR	0.288	2
12-3a-B7-7	CAR	0.353	2
12-3a-B7-8	CAR	0.391	4
12-3a-B7-9	CAR	0.269	2
12-3a-B7-1	CEF	0.55	2
12-3a-B7-10	CEF	0.566	2
12-3a-B7-11	CEF	0.658	2
12-3a-B7-12	CEF	0.461	2
12-3a-B7-13	CEF	0.42	2
12-3a-B7-14	CEF	0.61	8
12-3a-B7-15	CEF	0.775	16
12-3a-B7-16	CEF	0.356	2
12-3a-B7-17	CEF	0.447	2
12-3a-B7-18	CEF	0.557	2
12-3a-B7-19	CEF	0.445	2
12-3a-B7-2	CEF	0.416	2
12-3a-B7-20	CEF	0.472	2
12-3a-B7-3	CEF	0.533	2
12-3a-B7-4	CEF	0.589	2
12-3a-B7-5	CEF	0.485	2
12-3a-B7-6	CEF	0.478	2
12-3a-B7-7	CEF	0.46	2
12-3a-B7-8	CEF	0.467	2
12-3a-B7-9	CEF	0.531	2
12-3a-B7-1	CIP	0.076	2
12-3a-B7-10	CIP	-0.013	2
12-3a-B7-11	CIP	-0.065	2
12-3a-B7-12	CIP	0.014	2
12-3a-B7-13	CIP	-0.043	2
12-3a-B7-14	CIP	-0.009	2
12-3a-B7-15	CIP	-0.009	1
12-3a-B7-16	CIP	-0.046	2
12-3a-B7-17	CIP	0.024	2
12-3a-B7-18	CIP	-0.079	1
12-3a-B7-19	CIP	-0.062	2
12-3a-B7-2	CIP	0.083	2
12-3a-B7-20	CIP	0.036	2
12-3a-B7-3	CIP	0.009	2
12-3a-B7-4	CIP	-0.002	2
12-3a-B7-5	CIP	0.009	2
12-3a-B7-6	CIP	-0.025	2
12-3a-B7-7	CIP	0.013	2
12-3a-B7-8	CIP	-0.022	2
12-3a-B7-9	CIP	0.023	2
12-3a-B7-1	DOR	0.552	4
12-3a-B7-10	DOR	0.778	4
12-3a-B7-11	DOR	0.526	8
12-3a-B7-12	DOR	0.58	8
12-3a-B7-13	DOR	0.531	8
12-3a-B7-14	DOR	0.579	8
12-3a-B7-15	DOR	0.66	4
12-3a-B7-16	DOR	0.521	4
12-3a-B7-17	DOR	0.464	4
12-3a-B7-18	DOR	0.611	4
12-3a-B7-19	DOR	0.525	4
12-3a-B7-2	DOR	0.572	4
12-3a-B7-20	DOR	0.544	4
12-3a-B7-3	DOR	0.72	4
12-3a-B7-4	DOR	0.575	4
12-3a-B7-5	DOR	0.692	8
12-3a-B7-6	DOR	0.514	4
12-3a-B7-7	DOR	0.663	8
12-3a-B7-8	DOR	0.666	4
12-3a-B7-9	DOR	0.592	4
12-3a-B7-1	GEN	-0.009	0.5
12-3a-B7-10	GEN	-0.085	0.5
12-3a-B7-11	GEN	-0.171	0.5
12-3a-B7-12	GEN	-0.153	0.5
12-3a-B7-13	GEN	-0.202	0.5
12-3a-B7-14	GEN	-0.135	0.5
12-3a-B7-15	GEN	-0.125	0.5
12-3a-B7-16	GEN	-0.204	0.5
12-3a-B7-17	GEN	-0.205	0.5
12-3a-B7-18	GEN	-0.149	0.5
12-3a-B7-19	GEN	-0.132	1
12-3a-B7-2	GEN	-0.118	0.5
12-3a-B7-20	GEN	-0.192	1
12-3a-B7-3	GEN	-0.091	0.5
12-3a-B7-4	GEN	-0.027	0.5
12-3a-B7-5	GEN	-0.074	1
12-3a-B7-6	GEN	-0.055	0.5
12-3a-B7-7	GEN	-0.028	0.5
12-3a-B7-8	GEN	-0.104	0.5
12-3a-B7-9	GEN	-0.077	0.5
12-3a-C1-1	CAR	0.731	2
12-3a-C1-10	CAR	0.772	2
12-3a-C1-11	CAR	0.927	4
12-3a-C1-12	CAR	0.85	4
12-3a-C1-13	CAR	0.937	2
12-3a-C1-14	CAR	0.992	2
12-3a-C1-15	CAR	0.996	2
12-3a-C1-16	CAR	0.885	8
12-3a-C1-17	CAR	0.998	16
12-3a-C1-18	CAR	0.964	8
12-3a-C1-19	CAR	0.8	2
12-3a-C1-2	CAR	0.707	4
12-3a-C1-20	CAR	0.893	2
12-3a-C1-3	CAR	0.617	4
12-3a-C1-4	CAR	0.708	2
12-3a-C1-5	CAR	0.61	2
12-3a-C1-6	CAR	0.708	2
12-3a-C1-7	CAR	0.686	2
12-3a-C1-8	CAR	0.747	2
12-3a-C1-9	CAR	0.585	2
12-3a-C1-1	CEF	0.507	2
12-3a-C1-10	CEF	0.324	2
12-3a-C1-11	CEF	0.307	2
12-3a-C1-12	CEF	0.315	2
12-3a-C1-13	CEF	0.364	8
12-3a-C1-14	CEF	0.375	2
12-3a-C1-15	CEF	0.361	2
12-3a-C1-16	CEF	0.256	2
12-3a-C1-17	CEF	0.361	2
12-3a-C1-18	CEF	0.375	2
12-3a-C1-19	CEF	0.302	2
12-3a-C1-2	CEF	0.493	2
12-3a-C1-20	CEF	0.307	4
12-3a-C1-3	CEF	0.485	2
12-3a-C1-4	CEF	0.513	4
12-3a-C1-5	CEF	0.531	2
12-3a-C1-6	CEF	0.417	2
12-3a-C1-7	CEF	0.419	2
12-3a-C1-8	CEF	0.457	2
12-3a-C1-9	CEF	0.454	2
12-3a-C1-1	CIP	0.541	4
12-3a-C1-10	CIP	0.474	4
12-3a-C1-11	CIP	0.456	4
12-3a-C1-12	CIP	0.448	4
12-3a-C1-13	CIP	0.385	4
12-3a-C1-14	CIP	0.526	4
12-3a-C1-15	CIP	0.526	4
12-3a-C1-16	CIP	0.489	4
12-3a-C1-17	CIP	0.483	4
12-3a-C1-18	CIP	0.384	4
12-3a-C1-19	CIP	0.358	4
12-3a-C1-2	CIP	0.431	4
12-3a-C1-20	CIP	0.373	4
12-3a-C1-3	CIP	0.479	4
12-3a-C1-4	CIP	0.421	4
12-3a-C1-5	CIP	0.507	4
12-3a-C1-6	CIP	0.379	4
12-3a-C1-7	CIP	0.481	4
12-3a-C1-8	CIP	0.426	4
12-3a-C1-9	CIP	0.387	4
12-3a-C1-1	DOR	0.126	1
12-3a-C1-10	DOR	0.158	2
12-3a-C1-11	DOR	0.047	1
12-3a-C1-12	DOR	0.087	2
12-3a-C1-13	DOR	0.15	1
12-3a-C1-14	DOR	0.182	1
12-3a-C1-15	DOR	0.18	2
12-3a-C1-16	DOR	0.064	1
12-3a-C1-17	DOR	0.127	1
12-3a-C1-18	DOR	0.081	1
12-3a-C1-19	DOR	0.087	1
12-3a-C1-2	DOR	0.194	2
12-3a-C1-20	DOR	0.081	1
12-3a-C1-3	DOR	0.098	1
12-3a-C1-4	DOR	0.071	1
12-3a-C1-5	DOR	0.048	1
12-3a-C1-6	DOR	0.169	2
12-3a-C1-7	DOR	0.105	1
12-3a-C1-8	DOR	0.254	2
12-3a-C1-9	DOR	0.148	1
12-3a-C1-1	GEN	-0.003	1
12-3a-C1-10	GEN	0.017	1
12-3a-C1-11	GEN	0.025	1
12-3a-C1-12	GEN	-0.005	1
12-3a-C1-13	GEN	-0.045	1
12-3a-C1-14	GEN	-0.034	1
12-3a-C1-15	GEN	0.112	2
12-3a-C1-16	GEN	-0.025	1
12-3a-C1-17	GEN	0.061	1
12-3a-C1-18	GEN	-0.054	1
12-3a-C1-19	GEN	0.099	1
12-3a-C1-2	GEN	-0.046	1
12-3a-C1-20	GEN	-0.006	1
12-3a-C1-3	GEN	-0.025	1
12-3a-C1-4	GEN	0.071	1
12-3a-C1-5	GEN	0.071	1
12-3a-C1-6	GEN	-0.078	1
12-3a-C1-7	GEN	0.041	1
12-3a-C1-8	GEN	0.041	1
12-3a-C1-9	GEN	-0.068	1
12-3a-C7-1	CAR	0.195	2
12-3a-C7-10	CAR	0.143	2
12-3a-C7-11	CAR	0.229	2
12-3a-C7-12	CAR	0.131	2
12-3a-C7-13	CAR	0.144	2
12-3a-C7-14	CAR	0.308	4
12-3a-C7-15	CAR	0.267	2
12-3a-C7-16	CAR	0.178	2
12-3a-C7-17	CAR	0.118	2
12-3a-C7-18	CAR	0.216	4
12-3a-C7-19	CAR	0.214	4
12-3a-C7-2	CAR	0.232	2
12-3a-C7-20	CAR	0.075	2
12-3a-C7-3	CAR	0.17	2
12-3a-C7-4	CAR	0.334	4
12-3a-C7-5	CAR	0.178	2
12-3a-C7-6	CAR	0.129	2
12-3a-C7-7	CAR	0.313	2
12-3a-C7-8	CAR	0.037	2
12-3a-C7-9	CAR	0.309	2
12-3a-C7-1	CEF	0.416	4
12-3a-C7-10	CEF	0.388	2
12-3a-C7-11	CEF	0.364	16
12-3a-C7-12	CEF	0.297	16
12-3a-C7-13	CEF	0.176	16
12-3a-C7-14	CEF	0.232	16
12-3a-C7-15	CEF	0.182	2
12-3a-C7-16	CEF	0.22	16
12-3a-C7-17	CEF	0.245	16
12-3a-C7-18	CEF	0.172	16
12-3a-C7-19	CEF	0.243	16
12-3a-C7-2	CEF	0.356	2
12-3a-C7-20	CEF	0.197	16
12-3a-C7-3	CEF	0.235	2
12-3a-C7-4	CEF	0.235	2
12-3a-C7-5	CEF	0.317	2
12-3a-C7-6	CEF	0.267	4
12-3a-C7-7	CEF	0.28	2
12-3a-C7-8	CEF	0.205	2
12-3a-C7-9	CEF	0.334	2
12-3a-C7-1	CIP	0.013	2
12-3a-C7-10	CIP	-0.033	2
12-3a-C7-11	CIP	-0.029	2
12-3a-C7-12	CIP	-0.05	2
12-3a-C7-13	CIP	0	2
12-3a-C7-14	CIP	-0.031	2
12-3a-C7-15	CIP	-0.054	2
12-3a-C7-16	CIP	-0.045	2
12-3a-C7-17	CIP	0.048	2
12-3a-C7-18	CIP	-0.054	2
12-3a-C7-19	CIP	-0.01	2
12-3a-C7-2	CIP	-0.036	2
12-3a-C7-20	CIP	0.033	2
12-3a-C7-3	CIP	-0.081	2
12-3a-C7-4	CIP	0.02	2
12-3a-C7-5	CIP	-0.054	2
12-3a-C7-6	CIP	-0.076	2
12-3a-C7-7	CIP	-0.048	2
12-3a-C7-8	CIP	-0.076	2
12-3a-C7-9	CIP	-0.003	2
12-3a-C7-1	DOR	0.608	4
12-3a-C7-10	DOR	0.498	4
12-3a-C7-11	DOR	0.661	4
12-3a-C7-12	DOR	0.721	4
12-3a-C7-13	DOR	0.611	8
12-3a-C7-14	DOR	0.743	4
12-3a-C7-15	DOR	0.661	4
12-3a-C7-16	DOR	0.787	4
12-3a-C7-17	DOR	0.676	4
12-3a-C7-18	DOR	0.731	4
12-3a-C7-19	DOR	0.684	4
12-3a-C7-2	DOR	0.583	4
12-3a-C7-20	DOR	0.581	4
12-3a-C7-3	DOR	0.465	4
12-3a-C7-4	DOR	0.498	4
12-3a-C7-5	DOR	0.518	4
12-3a-C7-6	DOR	0.525	4
12-3a-C7-7	DOR	0.625	4
12-3a-C7-8	DOR	0.434	4
12-3a-C7-9	DOR	0.502	4
12-3a-C7-1	GEN	-0.102	1
12-3a-C7-10	GEN	-0.187	0.5
12-3a-C7-11	GEN	-0.153	1
12-3a-C7-12	GEN	-0.249	1
12-3a-C7-13	GEN	-0.247	1
12-3a-C7-14	GEN	-0.18	1
12-3a-C7-15	GEN	-0.247	1
12-3a-C7-16	GEN	-0.238	1
12-3a-C7-17	GEN	-0.209	0.5
12-3a-C7-18	GEN	-0.188	0.5
12-3a-C7-19	GEN	-0.277	0.5
12-3a-C7-2	GEN	-0.205	0.5
12-3a-C7-20	GEN	-0.283	0.5
12-3a-C7-3	GEN	-0.186	1
12-3a-C7-4	GEN	-0.211	0.5
12-3a-C7-5	GEN	-0.197	1
12-3a-C7-6	GEN	-0.215	0.5
12-3a-C7-7	GEN	-0.171	1
12-3a-C7-8	GEN	0	1
12-3a-C7-9	GEN	-0.182	1
12-3a-D1-1	CAR	0.377	2
12-3a-D1-10	CAR	0.529	2
12-3a-D1-11	CAR	0.369	4
12-3a-D1-12	CAR	0.287	2
12-3a-D1-13	CAR	0.327	2
12-3a-D1-14	CAR	0.36	2
12-3a-D1-15	CAR	0.485	2
12-3a-D1-16	CAR	0.224	2
12-3a-D1-17	CAR	0.41	4
12-3a-D1-18	CAR	0.332	2
12-3a-D1-19	CAR	0.311	2
12-3a-D1-2	CAR	0.418	2
12-3a-D1-20	CAR	0.35	2
12-3a-D1-3	CAR	0.542	2
12-3a-D1-4	CAR	0.525	2
12-3a-D1-5	CAR	0.532	2
12-3a-D1-6	CAR	0.47	2
12-3a-D1-7	CAR	0.597	2
12-3a-D1-8	CAR	0.636	2
12-3a-D1-9	CAR	0.486	2
12-3a-D1-1	CEF	0.563	2
12-3a-D1-10	CEF	0.223	2
12-3a-D1-11	CEF	0.466	4
12-3a-D1-12	CEF	0.125	2
12-3a-D1-13	CEF	0.291	8
12-3a-D1-14	CEF	0.331	2
12-3a-D1-15	CEF	0.392	4
12-3a-D1-16	CEF	0.201	2
12-3a-D1-17	CEF	0.224	2
12-3a-D1-18	CEF	0.194	2
12-3a-D1-19	CEF	0.246	2
12-3a-D1-2	CEF	0.439	2
12-3a-D1-20	CEF	0.177	2
12-3a-D1-3	CEF	0.457	2
12-3a-D1-4	CEF	0.46	2
12-3a-D1-5	CEF	0.419	2
12-3a-D1-6	CEF	0.244	2
12-3a-D1-7	CEF	0.281	2
12-3a-D1-8	CEF	0.274	2
12-3a-D1-9	CEF	0.364	2
12-3a-D1-1	CIP	0.009	2
12-3a-D1-10	CIP	-0.043	1
12-3a-D1-11	CIP	-0.011	1
12-3a-D1-12	CIP	0.01	1
12-3a-D1-13	CIP	-0.021	1
12-3a-D1-14	CIP	0.092	2
12-3a-D1-15	CIP	-0.008	1
12-3a-D1-16	CIP	-0.008	1
12-3a-D1-17	CIP	0.049	1
12-3a-D1-18	CIP	0.026	2
12-3a-D1-19	CIP	-0.013	1
12-3a-D1-2	CIP	-0.064	1
12-3a-D1-20	CIP	-0.046	1
12-3a-D1-3	CIP	0.046	2
12-3a-D1-4	CIP	-0.083	1
12-3a-D1-5	CIP	-0.082	1
12-3a-D1-6	CIP	-0.104	1
12-3a-D1-7	CIP	-0.104	1
12-3a-D1-8	CIP	0.019	1
12-3a-D1-9	CIP	-0.074	1
12-3a-D1-1	DOR	0.445	4
12-3a-D1-10	DOR	0.494	4
12-3a-D1-11	DOR	0.627	4
12-3a-D1-12	DOR	0.58	4
12-3a-D1-13	DOR	0.677	8
12-3a-D1-14	DOR	0.819	4
12-3a-D1-15	DOR	0.755	8
12-3a-D1-16	DOR	0.628	4
12-3a-D1-17	DOR	0.73	8
12-3a-D1-18	DOR	0.627	4
12-3a-D1-19	DOR	0.691	4
12-3a-D1-2	DOR	0.471	4
12-3a-D1-20	DOR	0.799	4
12-3a-D1-3	DOR	0.646	8
12-3a-D1-4	DOR	0.578	4
12-3a-D1-5	DOR	0.593	4
12-3a-D1-6	DOR	0.508	4
12-3a-D1-7	DOR	0.533	4
12-3a-D1-8	DOR	0.472	4
12-3a-D1-9	DOR	0.505	4
12-3a-D1-1	GEN	-0.09	0.5
12-3a-D1-10	GEN	-0.196	1
12-3a-D1-11	GEN	-0.072	1
12-3a-D1-12	GEN	-0.079	1
12-3a-D1-13	GEN	-0.147	1
12-3a-D1-14	GEN	-0.098	1
12-3a-D1-15	GEN	-0.115	1
12-3a-D1-16	GEN	-0.137	1
12-3a-D1-17	GEN	-0.169	1
12-3a-D1-18	GEN	-0.08	1
12-3a-D1-19	GEN	0.053	2
12-3a-D1-2	GEN	0.019	1
12-3a-D1-20	GEN	-0.192	1
12-3a-D1-3	GEN	0.006	1
12-3a-D1-4	GEN	0.012	1
12-3a-D1-5	GEN	-0.017	0.5
12-3a-D1-6	GEN	-0.035	1
12-3a-D1-7	GEN	-0.146	2
12-3a-D1-8	GEN	-0.108	1
12-3a-D1-9	GEN	0.032	1
12-3a-D7-1	CAR	0.392	2
12-3a-D7-10	CAR	0.214	2
12-3a-D7-11	CAR	0.337	2
12-3a-D7-12	CAR	0.452	2
12-3a-D7-13	CAR	0.407	16
12-3a-D7-14	CAR	0.506	16
12-3a-D7-15	CAR	0.43	2
12-3a-D7-16	CAR	0.417	2
12-3a-D7-17	CAR	0.281	2
12-3a-D7-18	CAR	0.326	2
12-3a-D7-19	CAR	0.262	2
12-3a-D7-2	CAR	0.314	2
12-3a-D7-20	CAR	0.267	2
12-3a-D7-3	CAR	0.325	2
12-3a-D7-4	CAR	0.384	2
12-3a-D7-5	CAR	0.401	2
12-3a-D7-6	CAR	0.316	2
12-3a-D7-7	CAR	0.458	4
12-3a-D7-8	CAR	0.46	2
12-3a-D7-9	CAR	0.338	2
12-3a-D7-1	CEF	0.415	2
12-3a-D7-10	CEF	0.397	4
12-3a-D7-11	CEF	0.291	4
12-3a-D7-12	CEF	0.283	2
12-3a-D7-13	CEF	0.278	2
12-3a-D7-14	CEF	0.272	4
12-3a-D7-15	CEF	0.447	2
12-3a-D7-16	CEF	0.13	2
12-3a-D7-17	CEF	0.255	2
12-3a-D7-18	CEF	0.212	2
12-3a-D7-19	CEF	0.286	2
12-3a-D7-2	CEF	0.273	2
12-3a-D7-20	CEF	0.144	2
12-3a-D7-3	CEF	0.398	2
12-3a-D7-4	CEF	0.59	2
12-3a-D7-5	CEF	0.408	2
12-3a-D7-6	CEF	0.538	2
12-3a-D7-7	CEF	0.468	2
12-3a-D7-8	CEF	0.348	2
12-3a-D7-9	CEF	0.247	2
12-3a-D7-1	CIP	-0.021	2
12-3a-D7-10	CIP	0.01	2
12-3a-D7-11	CIP	0.04	1
12-3a-D7-12	CIP	0.038	1
12-3a-D7-13	CIP	0.038	1
12-3a-D7-14	CIP	0.09	1
12-3a-D7-15	CIP	0.078	1
12-3a-D7-16	CIP	0.027	1
12-3a-D7-17	CIP	0.017	1
12-3a-D7-18	CIP	0.084	2
12-3a-D7-19	CIP	0.061	1
12-3a-D7-2	CIP	-0.015	2
12-3a-D7-20	CIP	-0.01	1
12-3a-D7-3	CIP	0.066	2
12-3a-D7-4	CIP	0.028	2
12-3a-D7-5	CIP	0.033	2
12-3a-D7-6	CIP	0.031	2
12-3a-D7-7	CIP	-0.015	2
12-3a-D7-8	CIP	0.092	2
12-3a-D7-9	CIP	-0.038	2
12-3a-D7-1	DOR	0.78	4
12-3a-D7-10	DOR	0.9	8
12-3a-D7-11	DOR	0.614	4
12-3a-D7-12	DOR	0.574	4
12-3a-D7-13	DOR	0.615	4
12-3a-D7-14	DOR	0.683	4
12-3a-D7-15	DOR	0.621	4
12-3a-D7-16	DOR	0.602	4
12-3a-D7-17	DOR	0.604	4
12-3a-D7-18	DOR	0.625	4
12-3a-D7-19	DOR	0.595	4
12-3a-D7-2	DOR	0.733	4
12-3a-D7-20	DOR	0.654	4
12-3a-D7-3	DOR	0.791	4
12-3a-D7-4	DOR	0.852	8
12-3a-D7-5	DOR	0.717	4
12-3a-D7-6	DOR	0.764	4
12-3a-D7-7	DOR	0.78	4
12-3a-D7-8	DOR	0.932	4
12-3a-D7-9	DOR	0.797	4
12-3a-D7-1	GEN	0.018	1
12-3a-D7-10	GEN	-0.08	1
12-3a-D7-11	GEN	-0.118	1
12-3a-D7-12	GEN	-0.104	1
12-3a-D7-13	GEN	-0.106	1
12-3a-D7-14	GEN	-0.092	1
12-3a-D7-15	GEN	-0.116	1
12-3a-D7-16	GEN	-0.044	1
12-3a-D7-17	GEN	-0.158	1
12-3a-D7-18	GEN	-0.129	1
12-3a-D7-19	GEN	-0.204	1
12-3a-D7-2	GEN	-0.048	1
12-3a-D7-20	GEN	-0.168	1
12-3a-D7-3	GEN	-0.079	2
12-3a-D7-4	GEN	-0.063	1
12-3a-D7-5	GEN	-0.067	1
12-3a-D7-6	GEN	-0.07	1
12-3a-D7-7	GEN	-0.14	1
12-3a-D7-8	GEN	-0.12	1
12-3a-D7-9	GEN	-0.16	1
12-3a-E1-1	CAR	0.793	8
12-3a-E1-10	CAR	0.628	2
12-3a-E1-11	CAR	0.624	4
12-3a-E1-12	CAR	0.585	4
12-3a-E1-13	CAR	0.545	4
12-3a-E1-14	CAR	0.688	4
12-3a-E1-15	CAR	0.58	4
12-3a-E1-16	CAR	0.512	4
12-3a-E1-17	CAR	0.576	4
12-3a-E1-18	CAR	0.484	4
12-3a-E1-19	CAR	0.458	4
12-3a-E1-2	CAR	0.612	2
12-3a-E1-20	CAR	0.478	4
12-3a-E1-3	CAR	0.486	2
12-3a-E1-4	CAR	0.631	4
12-3a-E1-5	CAR	0.738	2
12-3a-E1-6	CAR	0.675	4
12-3a-E1-7	CAR	0.514	2
12-3a-E1-8	CAR	0.781	4
12-3a-E1-9	CAR	0.549	2
12-3a-E1-1	CEF	0.045	2
12-3a-E1-10	CEF	0.031	2
12-3a-E1-11	CEF	0.366	2
12-3a-E1-12	CEF	0.319	2
12-3a-E1-13	CEF	0.302	2
12-3a-E1-14	CEF	0.274	2
12-3a-E1-15	CEF	0.304	2
12-3a-E1-16	CEF	0.556	16
12-3a-E1-17	CEF	0.42	8
12-3a-E1-18	CEF	0.208	2
12-3a-E1-19	CEF	0.514	8
12-3a-E1-2	CEF	0.091	4
12-3a-E1-20	CEF	0.432	16
12-3a-E1-3	CEF	0.183	4
12-3a-E1-4	CEF	0.189	2
12-3a-E1-5	CEF	0.273	2
12-3a-E1-6	CEF	0.179	2
12-3a-E1-7	CEF	0.149	2
12-3a-E1-8	CEF	0.144	2
12-3a-E1-9	CEF	0.075	2
12-3a-E1-1	CIP	0.439	4
12-3a-E1-10	CIP	0.338	4
12-3a-E1-11	CIP	0.453	4
12-3a-E1-12	CIP	0.437	4
12-3a-E1-13	CIP	0.305	4
12-3a-E1-14	CIP	0.414	4
12-3a-E1-15	CIP	0.386	4
12-3a-E1-16	CIP	0.347	4
12-3a-E1-17	CIP	0.474	4
12-3a-E1-18	CIP	0.427	4
12-3a-E1-19	CIP	0.401	4
12-3a-E1-2	CIP	0.383	4
12-3a-E1-20	CIP	0.354	4
12-3a-E1-3	CIP	0.308	4
12-3a-E1-4	CIP	0.364	4
12-3a-E1-5	CIP	0.361	4
12-3a-E1-6	CIP	0.308	4
12-3a-E1-7	CIP	0.347	4
12-3a-E1-8	CIP	0.267	4
12-3a-E1-9	CIP	0.329	4
12-3a-E1-1	DOR	0.06	2
12-3a-E1-10	DOR	-0.085	2
12-3a-E1-11	DOR	0.05	2
12-3a-E1-12	DOR	-0.031	2
12-3a-E1-13	DOR	-0.026	2
12-3a-E1-14	DOR	0.05	2
12-3a-E1-15	DOR	0.075	2
12-3a-E1-16	DOR	0.115	2
12-3a-E1-17	DOR	0.003	2
12-3a-E1-18	DOR	0.169	2
12-3a-E1-19	DOR	0.108	2
12-3a-E1-2	DOR	0.07	2
12-3a-E1-20	DOR	0.198	4
12-3a-E1-3	DOR	-0.028	2
12-3a-E1-4	DOR	0.048	4
12-3a-E1-5	DOR	-0.138	2
12-3a-E1-6	DOR	0.148	4
12-3a-E1-7	DOR	-0.029	2
12-3a-E1-8	DOR	0.094	8
12-3a-E1-9	DOR	0.017	4
12-3a-E1-1	GEN	-0.096	1
12-3a-E1-10	GEN	-0.308	0.5
12-3a-E1-11	GEN	0.236	2
12-3a-E1-12	GEN	-0.172	2
12-3a-E1-13	GEN	-0.075	1
12-3a-E1-14	GEN	0.071	1
12-3a-E1-15	GEN	0.104	2
12-3a-E1-16	GEN	0.036	1
12-3a-E1-17	GEN	-0.017	1
12-3a-E1-18	GEN	-0.026	1
12-3a-E1-19	GEN	-0.022	1
12-3a-E1-2	GEN	-0.113	2
12-3a-E1-20	GEN	-0.259	1
12-3a-E1-3	GEN	-0.144	1
12-3a-E1-4	GEN	-0.064	1
12-3a-E1-5	GEN	-0.042	1
12-3a-E1-6	GEN	-0.085	1
12-3a-E1-7	GEN	-0.098	1
12-3a-E1-8	GEN	-0.145	1
12-3a-E1-9	GEN	-0.118	1
12-3a-E7-1	CAR	0.363	2
12-3a-E7-10	CAR	0.247	2
12-3a-E7-11	CAR	0.425	2
12-3a-E7-12	CAR	0.29	2
12-3a-E7-13	CAR	0.364	2
12-3a-E7-14	CAR	0.354	2
12-3a-E7-15	CAR	0.378	2
12-3a-E7-16	CAR	0.345	8
12-3a-E7-17	CAR	0.397	8
12-3a-E7-18	CAR	0.331	4
12-3a-E7-19	CAR	0.309	2
12-3a-E7-2	CAR	0.221	2
12-3a-E7-20	CAR	0.481	8
12-3a-E7-3	CAR	0.279	2
12-3a-E7-4	CAR	0.363	4
12-3a-E7-5	CAR	0.362	2
12-3a-E7-6	CAR	0.286	4
12-3a-E7-7	CAR	0.326	4
12-3a-E7-8	CAR	0.299	2
12-3a-E7-9	CAR	0.237	2
12-3a-E7-1	CEF	0.31	16
12-3a-E7-10	CEF	0.436	16
12-3a-E7-11	CEF	0.574	16
12-3a-E7-12	CEF	0.554	16
12-3a-E7-13	CEF	0.448	16
12-3a-E7-14	CEF	0.491	2
12-3a-E7-15	CEF	0.432	2
12-3a-E7-16	CEF	0.482	2
12-3a-E7-17	CEF	0.34	2
12-3a-E7-18	CEF	0.403	2
12-3a-E7-19	CEF	0.32	16
12-3a-E7-2	CEF	0.411	16
12-3a-E7-20	CEF	0.396	2
12-3a-E7-3	CEF	0.382	16
12-3a-E7-4	CEF	0.221	2
12-3a-E7-5	CEF	0.729	16
12-3a-E7-6	CEF	0.333	16
12-3a-E7-7	CEF	0.227	2
12-3a-E7-8	CEF	0.3	16
12-3a-E7-9	CEF	0.434	16
12-3a-E7-1	CIP	0.311	2
12-3a-E7-10	CIP	0.258	2
12-3a-E7-11	CIP	0.26	2
12-3a-E7-12	CIP	0.326	2
12-3a-E7-13	CIP	0.306	2
12-3a-E7-14	CIP	0.279	2
12-3a-E7-15	CIP	0.262	2
12-3a-E7-16	CIP	0.231	2
12-3a-E7-17	CIP	0.308	2
12-3a-E7-18	CIP	0.242	2
12-3a-E7-19	CIP	0.235	2
12-3a-E7-2	CIP	0.258	2
12-3a-E7-20	CIP	0.322	2
12-3a-E7-3	CIP	0.235	2
12-3a-E7-4	CIP	0.249	2
12-3a-E7-5	CIP	0.233	2
12-3a-E7-6	CIP	0.254	2
12-3a-E7-7	CIP	0.311	2
12-3a-E7-8	CIP	0.284	2
12-3a-E7-9	CIP	0.258	2
12-3a-E7-1	DOR	-0.025	16
12-3a-E7-10	DOR	-0.077	16
12-3a-E7-11	DOR	0.063	1
12-3a-E7-12	DOR	0.013	1
12-3a-E7-13	DOR	0.013	1
12-3a-E7-14	DOR	0.06	2
12-3a-E7-15	DOR	0.028	1
12-3a-E7-16	DOR	0.002	2
12-3a-E7-17	DOR	0.041	1
12-3a-E7-18	DOR	0.053	2
12-3a-E7-19	DOR	0.002	1
12-3a-E7-2	DOR	-0.041	16
12-3a-E7-20	DOR	0.08	1
12-3a-E7-3	DOR	-0.049	1
12-3a-E7-4	DOR	-0.02	1
12-3a-E7-5	DOR	0.4	16
12-3a-E7-6	DOR	-0.071	16
12-3a-E7-7	DOR	0.047	1
12-3a-E7-8	DOR	-0.036	16
12-3a-E7-9	DOR	-0.099	0.5
12-3a-E7-1	GEN	-0.23	0.5
12-3a-E7-10	GEN	-0.283	0.5
12-3a-E7-11	GEN	-0.189	1
12-3a-E7-12	GEN	-0.175	1
12-3a-E7-13	GEN	-0.155	1
12-3a-E7-14	GEN	-0.116	1
12-3a-E7-15	GEN	-0.092	1
12-3a-E7-16	GEN	-0.191	1
12-3a-E7-17	GEN	-0.25	1
12-3a-E7-18	GEN	-0.211	1
12-3a-E7-19	GEN	-0.279	1
12-3a-E7-2	GEN	-0.231	0.5
12-3a-E7-20	GEN	-0.229	1
12-3a-E7-3	GEN	-0.293	0.5
12-3a-E7-4	GEN	-0.291	0.5
12-3a-E7-5	GEN	0.032	2
12-3a-E7-6	GEN	-0.298	0.5
12-3a-E7-7	GEN	-0.27	0.5
12-3a-E7-8	GEN	-0.173	0.5
12-3a-E7-9	GEN	-0.245	0.5
12-3a-F1-1	CAR	0.511	2
12-3a-F1-10	CAR	0.5	4
12-3a-F1-11	CAR	0.587	4
12-3a-F1-12	CAR	0.707	8
12-3a-F1-13	CAR	0.489	2
12-3a-F1-14	CAR	0.617	2
12-3a-F1-15	CAR	0.655	4
12-3a-F1-16	CAR	0.375	2
12-3a-F1-17	CAR	0.433	2
12-3a-F1-18	CAR	0.555	4
12-3a-F1-19	CAR	0.655	4
12-3a-F1-2	CAR	0.425	2
12-3a-F1-20	CAR	0.512	4
12-3a-F1-3	CAR	0.38	2
12-3a-F1-4	CAR	0.629	4
12-3a-F1-5	CAR	0.654	2
12-3a-F1-6	CAR	0.509	4
12-3a-F1-7	CAR	0.635	4
12-3a-F1-8	CAR	0.556	2
12-3a-F1-9	CAR	0.504	4
12-3a-F1-1	CEF	0.809	4
12-3a-F1-10	CEF	0.739	4
12-3a-F1-11	CEF	0.849	4
12-3a-F1-12	CEF	1.027	4
12-3a-F1-13	CEF	0.856	4
12-3a-F1-14	CEF	0.858	4
12-3a-F1-15	CEF	0.883	4
12-3a-F1-16	CEF	0.831	4
12-3a-F1-17	CEF	0.762	4
12-3a-F1-18	CEF	0.826	8
12-3a-F1-19	CEF	0.843	4
12-3a-F1-2	CEF	0.737	2
12-3a-F1-20	CEF	0.851	4
12-3a-F1-3	CEF	0.662	2
12-3a-F1-4	CEF	0.872	4
12-3a-F1-5	CEF	0.66	4
12-3a-F1-6	CEF	0.811	4
12-3a-F1-7	CEF	0.798	4
12-3a-F1-8	CEF	0.878	4
12-3a-F1-9	CEF	0.832	4
12-3a-F1-1	CIP	0.159	2
12-3a-F1-10	CIP	0.066	2
12-3a-F1-11	CIP	0.27	2
12-3a-F1-12	CIP	0.219	2
12-3a-F1-13	CIP	0.147	2
12-3a-F1-14	CIP	0.256	2
12-3a-F1-15	CIP	0.36	2
12-3a-F1-16	CIP	0.121	2
12-3a-F1-17	CIP	0.251	2
12-3a-F1-18	CIP	0.104	4
12-3a-F1-19	CIP	0.146	2
12-3a-F1-2	CIP	0.067	2
12-3a-F1-20	CIP	0.126	2
12-3a-F1-3	CIP	0.163	2
12-3a-F1-4	CIP	0.161	2
12-3a-F1-5	CIP	0.177	2
12-3a-F1-6	CIP	0.021	2
12-3a-F1-7	CIP	0.166	2
12-3a-F1-8	CIP	0.069	2
12-3a-F1-9	CIP	0.023	2
12-3a-F1-1	DOR	0.534	4
12-3a-F1-10	DOR	0.506	4
12-3a-F1-11	DOR	0.617	4
12-3a-F1-12	DOR	0.744	4
12-3a-F1-13	DOR	0.601	4
12-3a-F1-14	DOR	0.593	4
12-3a-F1-15	DOR	0.68	4
12-3a-F1-16	DOR	0.481	4
12-3a-F1-17	DOR	0.535	4
12-3a-F1-18	DOR	0.563	8
12-3a-F1-19	DOR	0.654	4
12-3a-F1-2	DOR	0.548	4
12-3a-F1-20	DOR	0.544	4
12-3a-F1-3	DOR	0.524	4
12-3a-F1-4	DOR	0.565	4
12-3a-F1-5	DOR	0.534	4
12-3a-F1-6	DOR	0.571	4
12-3a-F1-7	DOR	0.699	4
12-3a-F1-8	DOR	0.615	4
12-3a-F1-9	DOR	0.479	4
12-3a-F1-1	GEN	0.071	2
12-3a-F1-10	GEN	0.109	2
12-3a-F1-11	GEN	0.196	2
12-3a-F1-12	GEN	0.112	2
12-3a-F1-13	GEN	0.039	2
12-3a-F1-14	GEN	0.07	2
12-3a-F1-15	GEN	0.039	2
12-3a-F1-16	GEN	-0.052	2
12-3a-F1-17	GEN	0.026	2
12-3a-F1-18	GEN	-0.076	2
12-3a-F1-19	GEN	-0.021	2
12-3a-F1-2	GEN	0.213	2
12-3a-F1-20	GEN	-0.06	2
12-3a-F1-3	GEN	0.133	2
12-3a-F1-4	GEN	0.102	2
12-3a-F1-5	GEN	0.115	2
12-3a-F1-6	GEN	0.066	2
12-3a-F1-7	GEN	0.131	2
12-3a-F1-8	GEN	0.092	2
12-3a-F1-9	GEN	0.013	2
12-3a-F3-1	CAR	0.935	4
12-3a-F3-10	CAR	1.041	16
12-3a-F3-11	CAR	0.74	4
12-3a-F3-12	CAR	0.84	4
12-3a-F3-13	CAR	0.738	4
12-3a-F3-14	CAR	0.831	4
12-3a-F3-15	CAR	0.889	4
12-3a-F3-16	CAR	0.862	8
12-3a-F3-17	CAR	0.764	4
12-3a-F3-18	CAR	0.765	4
12-3a-F3-19	CAR	0.762	4
12-3a-F3-2	CAR	0.781	4
12-3a-F3-20	CAR	0.907	4
12-3a-F3-3	CAR	0.869	8
12-3a-F3-4	CAR	0.92	16
12-3a-F3-5	CAR	0.925	16
12-3a-F3-6	CAR	0.863	16
12-3a-F3-7	CAR	1.17	8
12-3a-F3-8	CAR	0.918	8
12-3a-F3-9	CAR	0.886	16
12-3a-F3-1	CEF	0.475	4
12-3a-F3-10	CEF	0.432	4
12-3a-F3-11	CEF	0.789	4
12-3a-F3-12	CEF	0.806	4
12-3a-F3-13	CEF	0.655	4
12-3a-F3-14	CEF	0.696	4
12-3a-F3-15	CEF	0.793	4
12-3a-F3-16	CEF	0.813	4
12-3a-F3-17	CEF	0.72	4
12-3a-F3-18	CEF	0.683	4
12-3a-F3-19	CEF	0.851	4
12-3a-F3-2	CEF	0.453	4
12-3a-F3-20	CEF	0.649	4
12-3a-F3-3	CEF	0.644	16
12-3a-F3-4	CEF	0.78	4
12-3a-F3-5	CEF	0.633	4
12-3a-F3-6	CEF	0.485	4
12-3a-F3-7	CEF	0.473	8
12-3a-F3-8	CEF	0.568	4
12-3a-F3-9	CEF	0.453	4
12-3a-F3-1	CIP	0.585	4
12-3a-F3-10	CIP	0.532	4
12-3a-F3-11	CIP	0.698	4
12-3a-F3-12	CIP	0.548	4
12-3a-F3-13	CIP	0.508	4
12-3a-F3-14	CIP	0.78	4
12-3a-F3-15	CIP	0.628	4
12-3a-F3-16	CIP	0.616	4
12-3a-F3-17	CIP	0.636	4
12-3a-F3-18	CIP	0.58	4
12-3a-F3-19	CIP	0.659	4
12-3a-F3-2	CIP	0.448	4
12-3a-F3-20	CIP	0.593	4
12-3a-F3-3	CIP	0.585	4
12-3a-F3-4	CIP	0.562	4
12-3a-F3-5	CIP	0.561	4
12-3a-F3-6	CIP	0.448	4
12-3a-F3-7	CIP	0.457	4
12-3a-F3-8	CIP	0.565	4
12-3a-F3-9	CIP	0.454	4
12-3a-F3-1	DOR	0.333	2
12-3a-F3-10	DOR	0.258	2
12-3a-F3-11	DOR	0.238	2
12-3a-F3-12	DOR	0.14	2
12-3a-F3-13	DOR	0.136	2
12-3a-F3-14	DOR	0.189	2
12-3a-F3-15	DOR	0.358	2
12-3a-F3-16	DOR	0.183	4
12-3a-F3-17	DOR	0.329	4
12-3a-F3-18	DOR	0.218	4
12-3a-F3-19	DOR	0.329	2
12-3a-F3-2	DOR	0.307	2
12-3a-F3-20	DOR	0.198	2
12-3a-F3-3	DOR	0.301	2
12-3a-F3-4	DOR	0.385	2
12-3a-F3-5	DOR	0.479	2
12-3a-F3-6	DOR	0.351	2
12-3a-F3-7	DOR	0.448	4
12-3a-F3-8	DOR	0.443	2
12-3a-F3-9	DOR	0.27	2
12-3a-F3-1	GEN	-0.262	0.5
12-3a-F3-10	GEN	-0.091	1
12-3a-F3-11	GEN	-0.016	1
12-3a-F3-12	GEN	0.002	1
12-3a-F3-13	GEN	-0.053	1
12-3a-F3-14	GEN	0.035	2
12-3a-F3-15	GEN	-0.085	1
12-3a-F3-16	GEN	-0.114	1
12-3a-F3-17	GEN	-0.049	1
12-3a-F3-18	GEN	0.052	1
12-3a-F3-19	GEN	-0.035	1
12-3a-F3-2	GEN	0.005	1
12-3a-F3-20	GEN	0.023	1
12-3a-F3-3	GEN	-0.157	1
12-3a-F3-4	GEN	-0.148	1
12-3a-F3-5	GEN	-0.125	1
12-3a-F3-6	GEN	-0.135	2
12-3a-F3-7	GEN	-0.243	0.5
12-3a-F3-8	GEN	-0.102	1
12-3a-F3-9	GEN	-0.185	0.5
12-3a-F7-1	CAR	-0.032	2
12-3a-F7-10	CAR	0.033	4
12-3a-F7-11	CAR	-0.051	4
12-3a-F7-12	CAR	-0.071	1
12-3a-F7-13	CAR	-0.087	2
12-3a-F7-14	CAR	0.083	1
12-3a-F7-15	CAR	-0.126	1
12-3a-F7-16	CAR	-0.16	2
12-3a-F7-17	CAR	-0.006	2
12-3a-F7-18	CAR	-0.072	1
12-3a-F7-19	CAR	-0.111	2
12-3a-F7-2	CAR	-0.087	1
12-3a-F7-20	CAR	-0.131	1
12-3a-F7-3	CAR	-0.041	1
12-3a-F7-4	CAR	-0.019	2
12-3a-F7-5	CAR	0.077	2
12-3a-F7-6	CAR	0.009	2
12-3a-F7-7	CAR	-0.054	2
12-3a-F7-8	CAR	0.058	2
12-3a-F7-9	CAR	-0.071	2
12-3a-F7-1	CEF	0.121	1
12-3a-F7-10	CEF	0.177	1
12-3a-F7-11	CEF	-0.102	1
12-3a-F7-12	CEF	-0.09	1
12-3a-F7-13	CEF	0.075	1
12-3a-F7-14	CEF	0.003	1
12-3a-F7-15	CEF	-0.015	1
12-3a-F7-16	CEF	-0.092	2
12-3a-F7-17	CEF	-0.033	1
12-3a-F7-18	CEF	-0.025	1
12-3a-F7-19	CEF	-0.052	1
12-3a-F7-2	CEF	0.127	1
12-3a-F7-20	CEF	-0.107	1
12-3a-F7-3	CEF	0.116	2
12-3a-F7-4	CEF	0.054	1
12-3a-F7-5	CEF	0.107	1
12-3a-F7-6	CEF	-0.003	1
12-3a-F7-7	CEF	0.13	1
12-3a-F7-8	CEF	0.153	1
12-3a-F7-9	CEF	0.088	1
12-3a-F7-1	CIP	0.022	1
12-3a-F7-10	CIP	-0.104	1
12-3a-F7-11	CIP	-0.022	1
12-3a-F7-12	CIP	-0.068	1
12-3a-F7-13	CIP	0	1
12-3a-F7-14	CIP	0.088	1
12-3a-F7-15	CIP	0.015	2
12-3a-F7-16	CIP	-0.056	2
12-3a-F7-17	CIP	-0.077	1
12-3a-F7-18	CIP	-0.059	1
12-3a-F7-19	CIP	-0.04	1
12-3a-F7-2	CIP	-0.091	2
12-3a-F7-20	CIP	-0.093	1
12-3a-F7-3	CIP	-0.091	1
12-3a-F7-4	CIP	-0.029	2
12-3a-F7-5	CIP	-0.027	1
12-3a-F7-6	CIP	-0.088	1
12-3a-F7-7	CIP	-0.059	1
12-3a-F7-8	CIP	-0.079	1
12-3a-F7-9	CIP	-0.067	1
12-3a-F7-1	DOR	-0.044	2
12-3a-F7-10	DOR	-0.156	1
12-3a-F7-11	DOR	-0.128	1
12-3a-F7-12	DOR	-0.103	1
12-3a-F7-13	DOR	-0.125	1
12-3a-F7-14	DOR	-0.03	1
12-3a-F7-15	DOR	-0.105	2
12-3a-F7-16	DOR	-0.16	1
12-3a-F7-17	DOR	-0.117	1
12-3a-F7-18	DOR	-0.144	1
12-3a-F7-19	DOR	0.025	4
12-3a-F7-2	DOR	-0.069	1
12-3a-F7-20	DOR	-0.125	1
12-3a-F7-3	DOR	-0.077	1
12-3a-F7-4	DOR	0.05	1
12-3a-F7-5	DOR	-0.073	1
12-3a-F7-6	DOR	-0.023	1
12-3a-F7-7	DOR	-0.166	1
12-3a-F7-8	DOR	-0.093	2
12-3a-F7-9	DOR	-0.176	1
12-3a-F7-1	GEN	-0.014	1
12-3a-F7-10	GEN	0.085	1
12-3a-F7-11	GEN	-0.078	1
12-3a-F7-12	GEN	0.084	2
12-3a-F7-13	GEN	-0.101	1
12-3a-F7-14	GEN	0.086	2
12-3a-F7-15	GEN	0.087	1
12-3a-F7-16	GEN	-0.069	1
12-3a-F7-17	GEN	0.148	2
12-3a-F7-18	GEN	0.041	1
12-3a-F7-19	GEN	0.035	1
12-3a-F7-2	GEN	0.179	1
12-3a-F7-20	GEN	0.04	1
12-3a-F7-3	GEN	0.078	1
12-3a-F7-4	GEN	0.331	1
12-3a-F7-5	GEN	0.2	1
12-3a-F7-6	GEN	0.032	1
12-3a-F7-7	GEN	0.113	1
12-3a-F7-8	GEN	0.121	1
12-3a-F7-9	GEN	0.081	0.5
12-3a-G1-1	CAR	0.22	2
12-3a-G1-10	CAR	0.298	2
12-3a-G1-11	CAR	0.16	4
12-3a-G1-12	CAR	0.24	4
12-3a-G1-13	CAR	0.209	4
12-3a-G1-14	CAR	0.402	4
12-3a-G1-15	CAR	0.2	2
12-3a-G1-16	CAR	0.152	4
12-3a-G1-17	CAR	0.303	4
12-3a-G1-18	CAR	0.078	2
12-3a-G1-19	CAR	0.284	4
12-3a-G1-2	CAR	0.237	2
12-3a-G1-20	CAR	0.39	4
12-3a-G1-3	CAR	0.204	2
12-3a-G1-4	CAR	0.35	2
12-3a-G1-5	CAR	0.244	2
12-3a-G1-6	CAR	0.211	2
12-3a-G1-7	CAR	0.178	2
12-3a-G1-8	CAR	0.196	2
12-3a-G1-9	CAR	0.199	2
12-3a-G1-1	CEF	0.666	4
12-3a-G1-10	CEF	0.629	4
12-3a-G1-11	CEF	0.467	4
12-3a-G1-12	CEF	0.482	4
12-3a-G1-13	CEF	0.484	4
12-3a-G1-14	CEF	0.378	4
12-3a-G1-15	CEF	0.326	8
12-3a-G1-16	CEF	0.519	4
12-3a-G1-17	CEF	0.456	4
12-3a-G1-18	CEF	0.543	4
12-3a-G1-19	CEF	0.446	16
12-3a-G1-2	CEF	0.463	4
12-3a-G1-20	CEF	0.445	4
12-3a-G1-3	CEF	0.502	4
12-3a-G1-4	CEF	0.485	4
12-3a-G1-5	CEF	0.753	4
12-3a-G1-6	CEF	0.549	4
12-3a-G1-7	CEF	0.468	4
12-3a-G1-8	CEF	0.939	4
12-3a-G1-9	CEF	0.468	4
12-3a-G1-1	CIP	0.106	2
12-3a-G1-10	CIP	0.074	2
12-3a-G1-11	CIP	0.124	2
12-3a-G1-12	CIP	0.062	2
12-3a-G1-13	CIP	0.06	2
12-3a-G1-14	CIP	0.109	4
12-3a-G1-15	CIP	0.105	2
12-3a-G1-16	CIP	0.083	2
12-3a-G1-17	CIP	0.088	2
12-3a-G1-18	CIP	0.24	2
12-3a-G1-19	CIP	0.055	2
12-3a-G1-2	CIP	0.116	2
12-3a-G1-20	CIP	0.055	2
12-3a-G1-3	CIP	0.16	2
12-3a-G1-4	CIP	0.104	2
12-3a-G1-5	CIP	0.11	2
12-3a-G1-6	CIP	0.091	2
12-3a-G1-7	CIP	0.146	2
12-3a-G1-8	CIP	0.096	2
12-3a-G1-9	CIP	0.088	2
12-3a-G1-1	DOR	0.407	4
12-3a-G1-10	DOR	0.423	8
12-3a-G1-11	DOR	0.46	4
12-3a-G1-12	DOR	0.414	4
12-3a-G1-13	DOR	0.415	4
12-3a-G1-14	DOR	0.495	4
12-3a-G1-15	DOR	0.366	8
12-3a-G1-16	DOR	0.532	4
12-3a-G1-17	DOR	0.466	4
12-3a-G1-18	DOR	0.495	4
12-3a-G1-19	DOR	0.467	4
12-3a-G1-2	DOR	0.428	4
12-3a-G1-20	DOR	0.567	8
12-3a-G1-3	DOR	0.491	8
12-3a-G1-4	DOR	0.506	4
12-3a-G1-5	DOR	0.54	4
12-3a-G1-6	DOR	0.521	8
12-3a-G1-7	DOR	0.593	8
12-3a-G1-8	DOR	0.459	8
12-3a-G1-9	DOR	0.447	8
12-3a-G1-1	GEN	0.123	2
12-3a-G1-10	GEN	-0.022	2
12-3a-G1-11	GEN	0.243	2
12-3a-G1-12	GEN	0.223	2
12-3a-G1-13	GEN	0.212	2
12-3a-G1-14	GEN	0.234	2
12-3a-G1-15	GEN	0.166	2
12-3a-G1-16	GEN	0.097	2
12-3a-G1-17	GEN	0.238	2
12-3a-G1-18	GEN	0.126	2
12-3a-G1-19	GEN	0.163	2
12-3a-G1-2	GEN	0.088	2
12-3a-G1-20	GEN	0.05	2
12-3a-G1-3	GEN	0.206	2
12-3a-G1-4	GEN	0.112	2
12-3a-G1-5	GEN	0.126	2
12-3a-G1-6	GEN	0.091	2
12-3a-G1-7	GEN	-0.013	2
12-3a-G1-8	GEN	0.059	2
12-3a-G1-9	GEN	0.06	2
12-3a-G7-1	CAR	0.308	4
12-3a-G7-10	CAR	0.324	8
12-3a-G7-11	CAR	0.19	2
12-3a-G7-12	CAR	0.209	2
12-3a-G7-13	CAR	0.193	2
12-3a-G7-14	CAR	0.461	8
12-3a-G7-15	CAR	0.321	4
12-3a-G7-16	CAR	0.19	2
12-3a-G7-17	CAR	0.335	8
12-3a-G7-18	CAR	0.288	2
12-3a-G7-19	CAR	0.349	8
12-3a-G7-2	CAR	0.289	4
12-3a-G7-20	CAR	0.255	2
12-3a-G7-3	CAR	0.275	4
12-3a-G7-4	CAR	0.347	4
12-3a-G7-5	CAR	0.301	4
12-3a-G7-6	CAR	0.303	2
12-3a-G7-7	CAR	0.283	2
12-3a-G7-8	CAR	0.228	2
12-3a-G7-9	CAR	0.358	8
12-3a-G7-1	CEF	0.294	16
12-3a-G7-10	CEF	0.338	16
12-3a-G7-11	CEF	0.418	2
12-3a-G7-12	CEF	0.293	2
12-3a-G7-13	CEF	0.399	2
12-3a-G7-14	CEF	0.41	2
12-3a-G7-15	CEF	0.302	2
12-3a-G7-16	CEF	0.364	2
12-3a-G7-17	CEF	0.461	2
12-3a-G7-18	CEF	0.435	2
12-3a-G7-19	CEF	0.336	2
12-3a-G7-2	CEF	0.415	2
12-3a-G7-20	CEF	0.317	2
12-3a-G7-3	CEF	0.265	2
12-3a-G7-4	CEF	0.473	16
12-3a-G7-5	CEF	0.446	16
12-3a-G7-6	CEF	0.371	16
12-3a-G7-7	CEF	0.308	16
12-3a-G7-8	CEF	0.633	16
12-3a-G7-9	CEF	0.323	16
12-3a-G7-1	CIP	-0.122	2
12-3a-G7-10	CIP	-0.083	2
12-3a-G7-11	CIP	-0.05	1
12-3a-G7-12	CIP	-0.042	1
12-3a-G7-13	CIP	-0.023	1
12-3a-G7-14	CIP	-0.034	1
12-3a-G7-15	CIP	-0.031	2
12-3a-G7-16	CIP	-0.067	1
12-3a-G7-17	CIP	0.082	1
12-3a-G7-18	CIP	-0.039	1
12-3a-G7-19	CIP	-0.034	2
12-3a-G7-2	CIP	-0.163	2
12-3a-G7-20	CIP	-0.068	1
12-3a-G7-3	CIP	-0.171	2
12-3a-G7-4	CIP	-0.009	2
12-3a-G7-5	CIP	-0.072	2
12-3a-G7-6	CIP	-0.151	2
12-3a-G7-7	CIP	-0.101	2
12-3a-G7-8	CIP	-0.076	2
12-3a-G7-9	CIP	-0.163	2
12-3a-G7-1	DOR	0.542	4
12-3a-G7-10	DOR	0.525	4
12-3a-G7-11	DOR	0.649	8
12-3a-G7-12	DOR	0.601	8
12-3a-G7-13	DOR	0.62	8
12-3a-G7-14	DOR	0.766	16
12-3a-G7-15	DOR	0.655	4
12-3a-G7-16	DOR	0.612	4
12-3a-G7-17	DOR	0.748	8
12-3a-G7-18	DOR	0.605	4
12-3a-G7-19	DOR	0.629	8
12-3a-G7-2	DOR	0.622	8
12-3a-G7-20	DOR	0.58	4
12-3a-G7-3	DOR	0.645	16
12-3a-G7-4	DOR	0.511	4
12-3a-G7-5	DOR	0.536	4
12-3a-G7-6	DOR	0.645	4
12-3a-G7-7	DOR	0.495	4
12-3a-G7-8	DOR	0.48	4
12-3a-G7-9	DOR	0.507	4
12-3a-G7-1	GEN	0.016	1
12-3a-G7-10	GEN	-0.122	1
12-3a-G7-11	GEN	-0.04	1
12-3a-G7-12	GEN	-0.1	1
12-3a-G7-13	GEN	-0.108	1
12-3a-G7-14	GEN	-0.001	2
12-3a-G7-15	GEN	0.092	2
12-3a-G7-16	GEN	-0.121	1
12-3a-G7-17	GEN	-0.127	1
12-3a-G7-18	GEN	-0.117	1
12-3a-G7-19	GEN	-0.148	1
12-3a-G7-2	GEN	-0.15	1
12-3a-G7-20	GEN	-0.151	1
12-3a-G7-3	GEN	-0.096	1
12-3a-G7-4	GEN	-0.022	1
12-3a-G7-5	GEN	-0.023	1
12-3a-G7-6	GEN	-0.082	1
12-3a-G7-7	GEN	-0.108	1
12-3a-G7-8	GEN	-0.099	1
12-3a-G7-9	GEN	-0.033	1
12-3a-H3-1	CAR	-0.178	2
12-3a-H3-10	CAR	-0.108	2
12-3a-H3-11	CAR	-0.072	2
12-3a-H3-12	CAR	-0.061	2
12-3a-H3-13	CAR	-0.068	2
12-3a-H3-14	CAR	-0.069	2
12-3a-H3-15	CAR	-0.091	2
12-3a-H3-16	CAR	-0.045	2
12-3a-H3-17	CAR	-0.075	2
12-3a-H3-18	CAR	-0.023	2
12-3a-H3-19	CAR	0.169	2
12-3a-H3-2	CAR	0.092	2
12-3a-H3-20	CAR	-0.137	2
12-3a-H3-3	CAR	-0.169	2
12-3a-H3-4	CAR	-0.128	2
12-3a-H3-5	CAR	0.189	2
12-3a-H3-6	CAR	-0.106	2
12-3a-H3-7	CAR	-0.108	2
12-3a-H3-8	CAR	0.016	2
12-3a-H3-9	CAR	-0.111	2
12-3a-H3-1	CEF	0.308	4
12-3a-H3-10	CEF	0.264	4
12-3a-H3-11	CEF	0.456	16
12-3a-H3-12	CEF	0.49	16
12-3a-H3-13	CEF	0.478	16
12-3a-H3-14	CEF	0.504	16
12-3a-H3-15	CEF	0.464	16
12-3a-H3-16	CEF	0.548	16
12-3a-H3-17	CEF	0.514	4
12-3a-H3-18	CEF	0.472	4
12-3a-H3-19	CEF	0.714	4
12-3a-H3-2	CEF	0.534	4
12-3a-H3-20	CEF	0.43	16
12-3a-H3-3	CEF	0.287	4
12-3a-H3-4	CEF	0.299	4
12-3a-H3-5	CEF	0.509	4
12-3a-H3-6	CEF	0.267	4
12-3a-H3-7	CEF	0.291	4
12-3a-H3-8	CEF	0.384	4
12-3a-H3-9	CEF	0.265	4
12-3a-H3-1	CIP	-0.186	2
12-3a-H3-10	CIP	-0.173	2
12-3a-H3-11	CIP	-0.224	2
12-3a-H3-12	CIP	-0.193	2
12-3a-H3-13	CIP	-0.205	2
12-3a-H3-14	CIP	-0.188	2
12-3a-H3-15	CIP	-0.177	2
12-3a-H3-16	CIP	-0.194	2
12-3a-H3-17	CIP	-0.198	2
12-3a-H3-18	CIP	-0.174	2
12-3a-H3-19	CIP	-0.056	2
12-3a-H3-2	CIP	-0.064	2
12-3a-H3-20	CIP	-0.207	2
12-3a-H3-3	CIP	-0.16	2
12-3a-H3-4	CIP	-0.165	2
12-3a-H3-5	CIP	-0.072	2
12-3a-H3-6	CIP	-0.198	2
12-3a-H3-7	CIP	-0.193	2
12-3a-H3-8	CIP	-0.178	2
12-3a-H3-9	CIP	-0.17	2
12-3a-H3-1	DOR	0.164	16
12-3a-H3-10	DOR	0.147	8
12-3a-H3-11	DOR	0.306	16
12-3a-H3-12	DOR	0.281	8
12-3a-H3-13	DOR	0.258	16
12-3a-H3-14	DOR	0.246	8
12-3a-H3-15	DOR	0.243	8
12-3a-H3-16	DOR	0.301	16
12-3a-H3-17	DOR	0.24	16
12-3a-H3-18	DOR	0.249	16
12-3a-H3-19	DOR	0.46	16
12-3a-H3-2	DOR	0.454	16
12-3a-H3-20	DOR	0.256	8
12-3a-H3-3	DOR	0.122	8
12-3a-H3-4	DOR	0.138	8
12-3a-H3-5	DOR	0.303	16
12-3a-H3-6	DOR	0.104	8
12-3a-H3-7	DOR	0.105	8
12-3a-H3-8	DOR	0.127	16
12-3a-H3-9	DOR	0.108	8
12-3a-H3-1	GEN	-0.392	0.5
12-3a-H3-10	GEN	-0.404	0.5
12-3a-H3-11	GEN	-0.415	0.5
12-3a-H3-12	GEN	-0.403	0.5
12-3a-H3-13	GEN	-0.414	0.5
12-3a-H3-14	GEN	-0.414	0.5
12-3a-H3-15	GEN	-0.396	0.5
12-3a-H3-16	GEN	-0.396	0.5
12-3a-H3-17	GEN	-0.42	0.5
12-3a-H3-18	GEN	-0.374	0.5
12-3a-H3-19	GEN	-0.32	1
12-3a-H3-2	GEN	-0.321	0.5
12-3a-H3-20	GEN	-0.426	0.5
12-3a-H3-3	GEN	-0.381	0.5
12-3a-H3-4	GEN	-0.374	0.5
12-3a-H3-5	GEN	-0.313	0.5
12-3a-H3-6	GEN	-0.412	0.5
12-3a-H3-7	GEN	-0.391	0.5
12-3a-H3-8	GEN	-0.35	0.5
12-3a-H3-9	GEN	-0.395	0.5
12-3a-H7-1	CAR	0.581	4
12-3a-H7-10	CAR	0.496	4
12-3a-H7-11	CAR	0.373	4
12-3a-H7-12	CAR	0.404	4
12-3a-H7-13	CAR	0.542	16
12-3a-H7-14	CAR	0.535	8
12-3a-H7-15	CAR	0.434	4
12-3a-H7-16	CAR	0.312	8
12-3a-H7-17	CAR	0.361	16
12-3a-H7-18	CAR	0.393	16
12-3a-H7-19	CAR	0.36	4
12-3a-H7-2	CAR	0.432	4
12-3a-H7-20	CAR	0.421	4
12-3a-H7-3	CAR	0.565	4
12-3a-H7-4	CAR	0.61	8
12-3a-H7-5	CAR	0.462	4
12-3a-H7-6	CAR	0.419	4
12-3a-H7-7	CAR	0.491	8
12-3a-H7-8	CAR	0.667	8
12-3a-H7-9	CAR	0.163	16
12-3a-H7-1	CEF	0.473	2
12-3a-H7-10	CEF	0.678	2
12-3a-H7-11	CEF	0.338	2
12-3a-H7-12	CEF	0.375	2
12-3a-H7-13	CEF	0.296	2
12-3a-H7-14	CEF	0.374	2
12-3a-H7-15	CEF	0.545	2
12-3a-H7-16	CEF	0.315	2
12-3a-H7-17	CEF	0.313	2
12-3a-H7-18	CEF	0.289	2
12-3a-H7-19	CEF	0.528	8
12-3a-H7-2	CEF	0.451	2
12-3a-H7-20	CEF	0.458	2
12-3a-H7-3	CEF	0.345	2
12-3a-H7-4	CEF	0.463	2
12-3a-H7-5	CEF	0.431	2
12-3a-H7-6	CEF	0.41	2
12-3a-H7-7	CEF	0.531	2
12-3a-H7-8	CEF	0.402	2
12-3a-H7-9	CEF	0.355	2
12-3a-H7-1	CIP	0.209	2
12-3a-H7-10	CIP	0.154	2
12-3a-H7-11	CIP	0.151	2
12-3a-H7-12	CIP	0.202	2
12-3a-H7-13	CIP	0.181	2
12-3a-H7-14	CIP	0.106	2
12-3a-H7-15	CIP	0.223	2
12-3a-H7-16	CIP	0.193	2
12-3a-H7-17	CIP	0.094	2
12-3a-H7-18	CIP	0.122	4
12-3a-H7-19	CIP	0.09	2
12-3a-H7-2	CIP	0.133	2
12-3a-H7-20	CIP	0.144	2
12-3a-H7-3	CIP	0.204	2
12-3a-H7-4	CIP	0.136	2
12-3a-H7-5	CIP	0.122	2
12-3a-H7-6	CIP	0.126	2
12-3a-H7-7	CIP	0.125	2
12-3a-H7-8	CIP	0.153	2
12-3a-H7-9	CIP	0.146	2
12-3a-H7-1	DOR	0.199	4
12-3a-H7-10	DOR	0.06	4
12-3a-H7-11	DOR	0.23	4
12-3a-H7-12	DOR	0.059	4
12-3a-H7-13	DOR	0.043	4
12-3a-H7-14	DOR	0.124	4
12-3a-H7-15	DOR	0.145	8
12-3a-H7-16	DOR	0.104	4
12-3a-H7-17	DOR	0.038	4
12-3a-H7-18	DOR	0.115	4
12-3a-H7-19	DOR	0.337	8
12-3a-H7-2	DOR	0.248	4
12-3a-H7-20	DOR	0.205	4
12-3a-H7-3	DOR	0.042	4
12-3a-H7-4	DOR	0.218	4
12-3a-H7-5	DOR	0.118	4
12-3a-H7-6	DOR	0.109	8
12-3a-H7-7	DOR	0.043	4
12-3a-H7-8	DOR	0.031	4
12-3a-H7-9	DOR	0.12	4
12-3a-H7-1	GEN	-0.069	2
12-3a-H7-10	GEN	-0.21	2
12-3a-H7-11	GEN	-0.253	1
12-3a-H7-12	GEN	-0.243	1
12-3a-H7-13	GEN	-0.185	1
12-3a-H7-14	GEN	-0.259	1
12-3a-H7-15	GEN	-0.272	2
12-3a-H7-16	GEN	-0.186	1
12-3a-H7-17	GEN	-0.238	1
12-3a-H7-18	GEN	-0.302	1
12-3a-H7-19	GEN	0.04	2
12-3a-H7-2	GEN	-0.235	1
12-3a-H7-20	GEN	-0.275	1
12-3a-H7-3	GEN	-0.181	1
12-3a-H7-4	GEN	-0.274	1
12-3a-H7-5	GEN	-0.193	1
12-3a-H7-6	GEN	-0.256	1
12-3a-H7-7	GEN	-0.269	1
12-3a-H7-8	GEN	-0.285	1
12-3a-H7-9	GEN	-0.235	1
48-3a-A1-1	CAR	0.448	2
48-3a-A1-10	CAR	0.453	4
48-3a-A1-11	CAR	0.489	4
48-3a-A1-12	CAR	0.422	2
48-3a-A1-13	CAR	0.554	2
48-3a-A1-14	CAR	0.735	2
48-3a-A1-15	CAR	0.489	2
48-3a-A1-16	CAR	0.611	4
48-3a-A1-17	CAR	0.486	4
48-3a-A1-18	CAR	0.512	4
48-3a-A1-19	CAR	0.546	4
48-3a-A1-2	CAR	0.391	4
48-3a-A1-20	CAR	0.464	4
48-3a-A1-3	CAR	0.546	4
48-3a-A1-4	CAR	0.517	2
48-3a-A1-5	CAR	0.492	2
48-3a-A1-6	CAR	0.521	2
48-3a-A1-7	CAR	0.482	2
48-3a-A1-8	CAR	0.462	4
48-3a-A1-9	CAR	0.5	8
48-3a-A1-1	CEF	0.555	4
48-3a-A1-10	CEF	0.326	2
48-3a-A1-11	CEF	0.413	2
48-3a-A1-12	CEF	0.431	2
48-3a-A1-13	CEF	0.402	2
48-3a-A1-14	CEF	0.436	4
48-3a-A1-15	CEF	0.529	2
48-3a-A1-16	CEF	0.476	4
48-3a-A1-17	CEF	0.451	2
48-3a-A1-18	CEF	0.605	2
48-3a-A1-19	CEF	0.684	4
48-3a-A1-2	CEF	0.377	2
48-3a-A1-20	CEF	0.631	4
48-3a-A1-3	CEF	0.575	2
48-3a-A1-4	CEF	0.764	2
48-3a-A1-5	CEF	0.617	2
48-3a-A1-6	CEF	0.692	4
48-3a-A1-7	CEF	0.374	2
48-3a-A1-8	CEF	0.489	2
48-3a-A1-9	CEF	0.442	2
48-3a-A1-1	CIP	0.021	2
48-3a-A1-10	CIP	-0.007	2
48-3a-A1-11	CIP	-0.131	2
48-3a-A1-12	CIP	0.301	2
48-3a-A1-13	CIP	0.075	1
48-3a-A1-14	CIP	0.306	2
48-3a-A1-15	CIP	0.227	2
48-3a-A1-16	CIP	0.187	2
48-3a-A1-17	CIP	0.448	2
48-3a-A1-18	CIP	0.261	1
48-3a-A1-19	CIP	0.286	2
48-3a-A1-2	CIP	0.063	2
48-3a-A1-20	CIP	0.368	2
48-3a-A1-3	CIP	0.04	2
48-3a-A1-4	CIP	0.212	2
48-3a-A1-5	CIP	0.134	2
48-3a-A1-6	CIP	0.11	2
48-3a-A1-7	CIP	0.038	2
48-3a-A1-8	CIP	0.289	2
48-3a-A1-9	CIP	-0.009	2
48-3a-A1-1	DOR	0.473	16
48-3a-A1-10	DOR	0.384	16
48-3a-A1-11	DOR	0.097	4
48-3a-A1-12	DOR	0.455	16
48-3a-A1-13	DOR	0.368	16
48-3a-A1-14	DOR	0.394	16
48-3a-A1-15	DOR	0.503	16
48-3a-A1-16	DOR	0.392	16
48-3a-A1-17	DOR	0.525	16
48-3a-A1-18	DOR	0.419	16
48-3a-A1-19	DOR	0.488	16
48-3a-A1-2	DOR	0.495	16
48-3a-A1-20	DOR	0.195	4
48-3a-A1-3	DOR	0.239	16
48-3a-A1-4	DOR	0.503	16
48-3a-A1-5	DOR	0.487	16
48-3a-A1-6	DOR	0.065	4
48-3a-A1-7	DOR	0.285	16
48-3a-A1-8	DOR	0.257	4
48-3a-A1-9	DOR	0.358	16
48-3a-A1-1	GEN	-0.13	1
48-3a-A1-10	GEN	-0.216	0.5
48-3a-A1-11	GEN	-0.283	1
48-3a-A1-12	GEN	-0.054	1
48-3a-A1-13	GEN	-0.206	0.5
48-3a-A1-14	GEN	-0.085	1
48-3a-A1-15	GEN	-0.22	2
48-3a-A1-16	GEN	-0.115	2
48-3a-A1-17	GEN	-0.234	1
48-3a-A1-18	GEN	-0.288	0.5
48-3a-A1-19	GEN	-0.293	0.5
48-3a-A1-2	GEN	-0.202	0.5
48-3a-A1-20	GEN	-0.216	1
48-3a-A1-3	GEN	-0.32	0.5
48-3a-A1-4	GEN	-0.108	1
48-3a-A1-5	GEN	-0.178	1
48-3a-A1-6	GEN	-0.114	1
48-3a-A1-7	GEN	-0.261	1
48-3a-A1-8	GEN	-0.109	2
48-3a-A1-9	GEN	-0.317	0.5
48-3a-A7-1	CAR	0.507	4
48-3a-A7-10	CAR	0.558	4
48-3a-A7-11	CAR	0.389	4
48-3a-A7-12	CAR	0.424	16
48-3a-A7-13	CAR	0.339	4
48-3a-A7-14	CAR	0.373	4
48-3a-A7-16	CAR	0.305	4
48-3a-A7-17	CAR	0.25	8
48-3a-A7-18	CAR	0.362	4
48-3a-A7-19	CAR	0.336	4
48-3a-A7-2	CAR	0.563	4
48-3a-A7-20	CAR	0.261	4
48-3a-A7-3	CAR	0.49	4
48-3a-A7-4	CAR	0.351	4
48-3a-A7-5	CAR	0.614	4
48-3a-A7-6	CAR	0.449	4
48-3a-A7-7	CAR	0.535	16
48-3a-A7-8	CAR	0.474	4
48-3a-A7-9	CAR	0.502	4
48-3a-A7-1	CEF	0.271	2
48-3a-A7-10	CEF	0.284	16
48-3a-A7-11	CEF	0.445	16
48-3a-A7-12	CEF	0.19	2
48-3a-A7-13	CEF	0.257	2
48-3a-A7-14	CEF	0.284	2
48-3a-A7-16	CEF	0.309	2
48-3a-A7-17	CEF	0.215	2
48-3a-A7-18	CEF	0.376	16
48-3a-A7-19	CEF	0.232	2
48-3a-A7-2	CEF	0.202	16
48-3a-A7-20	CEF	0.282	2
48-3a-A7-3	CEF	0.171	4
48-3a-A7-4	CEF	0.328	16
48-3a-A7-5	CEF	0.463	16
48-3a-A7-6	CEF	0.239	8
48-3a-A7-7	CEF	0.171	2
48-3a-A7-8	CEF	0.169	16
48-3a-A7-9	CEF	0.228	8
48-3a-A7-1	CIP	0.096	2
48-3a-A7-10	CIP	0.101	2
48-3a-A7-11	CIP	0.122	4
48-3a-A7-12	CIP	0.023	2
48-3a-A7-13	CIP	0.007	2
48-3a-A7-14	CIP	0.027	2
48-3a-A7-16	CIP	0.019	2
48-3a-A7-17	CIP	-0.063	2
48-3a-A7-18	CIP	0.178	4
48-3a-A7-19	CIP	0.032	2
48-3a-A7-2	CIP	0.215	4
48-3a-A7-20	CIP	0.033	2
48-3a-A7-3	CIP	0.081	2
48-3a-A7-4	CIP	0.157	2
48-3a-A7-5	CIP	0.173	4
48-3a-A7-6	CIP	0.098	2
48-3a-A7-7	CIP	0.16	4
48-3a-A7-8	CIP	0.175	4
48-3a-A7-9	CIP	0.073	2
48-3a-A7-1	DOR	0.132	2
48-3a-A7-10	DOR	0.183	2
48-3a-A7-11	DOR	0.221	2
48-3a-A7-12	DOR	0.065	2
48-3a-A7-13	DOR	0.041	1
48-3a-A7-14	DOR	0.025	2
48-3a-A7-16	DOR	-0.01	2
48-3a-A7-17	DOR	0.29	8
48-3a-A7-18	DOR	0.235	2
48-3a-A7-19	DOR	0.044	2
48-3a-A7-2	DOR	0.276	2
48-3a-A7-20	DOR	0.068	2
48-3a-A7-3	DOR	0.11	2
48-3a-A7-4	DOR	0.679	8
48-3a-A7-5	DOR	0.4	2
48-3a-A7-6	DOR	0.086	2
48-3a-A7-7	DOR	0.268	2
48-3a-A7-8	DOR	0.202	2
48-3a-A7-9	DOR	0.104	2
48-3a-A7-1	GEN	-0.214	1
48-3a-A7-10	GEN	-0.163	0.5
48-3a-A7-11	GEN	-0.283	0.5
48-3a-A7-12	GEN	-0.251	1
48-3a-A7-13	GEN	-0.262	1
48-3a-A7-14	GEN	-0.225	1
48-3a-A7-16	GEN	-0.122	1
48-3a-A7-17	GEN	-0.273	0.5
48-3a-A7-18	GEN	-0.242	0.5
48-3a-A7-19	GEN	-0.231	1
48-3a-A7-2	GEN	-0.207	0.5
48-3a-A7-20	GEN	-0.217	1
48-3a-A7-3	GEN	-0.173	1
48-3a-A7-4	GEN	-0.21	0.5
48-3a-A7-5	GEN	-0.193	1
48-3a-A7-6	GEN	-0.237	0.5
48-3a-A7-7	GEN	-0.244	0.5
48-3a-A7-8	GEN	-0.266	0.5
48-3a-A7-9	GEN	-0.22	0.5
48-3a-B1-1	CAR	-0.044	2
48-3a-B1-10	CAR	-0.002	2
48-3a-B1-11	CAR	-0.029	1
48-3a-B1-12	CAR	0.002	2
48-3a-B1-13	CAR	0.034	2
48-3a-B1-14	CAR	-0.06	2
48-3a-B1-15	CAR	-0.049	2
48-3a-B1-16	CAR	0	2
48-3a-B1-17	CAR	0.354	8
48-3a-B1-18	CAR	0.049	2
48-3a-B1-19	CAR	0.032	4
48-3a-B1-2	CAR	-0.023	2
48-3a-B1-20	CAR	0.133	2
48-3a-B1-3	CAR	-0.04	2
48-3a-B1-4	CAR	-0.042	2
48-3a-B1-5	CAR	-0.06	1
48-3a-B1-6	CAR	-0.035	2
48-3a-B1-7	CAR	-0.015	2
48-3a-B1-8	CAR	-0.025	2
48-3a-B1-9	CAR	-0.039	2
48-3a-B1-1	CEF	0.55	2
48-3a-B1-10	CEF	0.538	2
48-3a-B1-11	CEF	0.456	2
48-3a-B1-12	CEF	0.267	2
48-3a-B1-13	CEF	0.187	2
48-3a-B1-14	CEF	0.306	2
48-3a-B1-15	CEF	0.452	8
48-3a-B1-16	CEF	0.517	2
48-3a-B1-17	CEF	0.87	16
48-3a-B1-18	CEF	0.542	2
48-3a-B1-19	CEF	0.476	2
48-3a-B1-2	CEF	0.569	2
48-3a-B1-20	CEF	0.474	2
48-3a-B1-3	CEF	0.514	2
48-3a-B1-4	CEF	0.557	2
48-3a-B1-5	CEF	0.282	2
48-3a-B1-6	CEF	0.566	2
48-3a-B1-7	CEF	0.332	2
48-3a-B1-8	CEF	0.555	2
48-3a-B1-9	CEF	0.5	2
48-3a-B1-1	CIP	0.007	2
48-3a-B1-10	CIP	-0.018	2
48-3a-B1-11	CIP	0.048	2
48-3a-B1-12	CIP	-0.021	2
48-3a-B1-13	CIP	0.028	1
48-3a-B1-14	CIP	-0.035	1
48-3a-B1-15	CIP	0.016	2
48-3a-B1-16	CIP	-0.023	2
48-3a-B1-17	CIP	0.149	2
48-3a-B1-18	CIP	0.069	2
48-3a-B1-19	CIP	-0.034	2
48-3a-B1-2	CIP	0.068	2
48-3a-B1-20	CIP	-0.032	2
48-3a-B1-3	CIP	0.047	2
48-3a-B1-4	CIP	0.025	2
48-3a-B1-5	CIP	0.039	2
48-3a-B1-6	CIP	0.061	2
48-3a-B1-7	CIP	0.095	2
48-3a-B1-8	CIP	0.016	2
48-3a-B1-9	CIP	-0.004	2
48-3a-B1-1	DOR	0.323	4
48-3a-B1-10	DOR	0.235	4
48-3a-B1-11	DOR	0.304	4
48-3a-B1-12	DOR	0.292	8
48-3a-B1-13	DOR	0.266	8
48-3a-B1-14	DOR	0.278	4
48-3a-B1-15	DOR	0.379	4
48-3a-B1-16	DOR	0.378	4
48-3a-B1-17	DOR	0.43	4
48-3a-B1-18	DOR	0.379	4
48-3a-B1-19	DOR	0.359	4
48-3a-B1-2	DOR	0.254	4
48-3a-B1-20	DOR	0.351	4
48-3a-B1-3	DOR	0.323	4
48-3a-B1-4	DOR	0.269	4
48-3a-B1-5	DOR	0.117	4
48-3a-B1-6	DOR	0.32	4
48-3a-B1-7	DOR	0.18	8
48-3a-B1-8	DOR	0.269	4
48-3a-B1-9	DOR	0.295	4
48-3a-B1-1	GEN	-0.061	1
48-3a-B1-10	GEN	-0.095	1
48-3a-B1-11	GEN	-0.067	1
48-3a-B1-12	GEN	-0.098	1
48-3a-B1-13	GEN	-0.102	1
48-3a-B1-14	GEN	-0.13	1
48-3a-B1-15	GEN	-0.124	1
48-3a-B1-16	GEN	-0.161	1
48-3a-B1-17	GEN	-0.048	1
48-3a-B1-18	GEN	-0.068	1
48-3a-B1-19	GEN	-0.11	1
48-3a-B1-2	GEN	-0.068	1
48-3a-B1-20	GEN	-0.089	1
48-3a-B1-3	GEN	-0.062	1
48-3a-B1-4	GEN	-0.154	1
48-3a-B1-5	GEN	-0.076	1
48-3a-B1-6	GEN	-0.005	1
48-3a-B1-7	GEN	-0.014	1
48-3a-B1-8	GEN	-0.015	1
48-3a-B1-9	GEN	-0.069	1
48-3a-B7star-1	CAR	0.242	2
48-3a-B7star-10	CAR	0.231	2
48-3a-B7star-11	CAR	0.155	4
48-3a-B7star-12	CAR	0.201	2
[truncated: 1,396 more rows]
