# Supplementary material for: High potency of sequential therapy with only β-lactam antibiotics
Source: eLife. 2021 Jul 28;10:e68876. doi: 10.7554/eLife.68876 (PMC8456660; doi:10.7554/eLife.68876)
Supplement: Figure 2—figure supplement 5—source data 1. [file elife-68876-fig2-figsupp5-data1.xlsx]

## Sheet: Figure 2 - Figure Supplement 5
isolate	evoexp_ID	transfer	treatment	ab	sum
12-3a-A1-1	10	12	slow-regular	CAR-DOR-CEF	1.068
12-3a-A1-10	10	12	slow-regular	CAR-DOR-CEF	1
12-3a-A1-11	10	12	slow-regular	CAR-DOR-CEF	1.011
12-3a-A1-12	10	12	slow-regular	CAR-DOR-CEF	0.645
12-3a-A1-13	10	12	slow-regular	CAR-DOR-CEF	0.712
12-3a-A1-14	10	12	slow-regular	CAR-DOR-CEF	1.071
12-3a-A1-15	10	12	slow-regular	CAR-DOR-CEF	1.305
12-3a-A1-16	10	12	slow-regular	CAR-DOR-CEF	0.824
12-3a-A1-17	10	12	slow-regular	CAR-DOR-CEF	1.113
12-3a-A1-18	10	12	slow-regular	CAR-DOR-CEF	1.426
12-3a-A1-19	10	12	slow-regular	CAR-DOR-CEF	0.946
12-3a-A1-2	10	12	slow-regular	CAR-DOR-CEF	1.213
12-3a-A1-20	10	12	slow-regular	CAR-DOR-CEF	0.991
12-3a-A1-3	10	12	slow-regular	CAR-DOR-CEF	1.304
12-3a-A1-4	10	12	slow-regular	CAR-DOR-CEF	1.152
12-3a-A1-5	10	12	slow-regular	CAR-DOR-CEF	1.626
12-3a-A1-6	10	12	slow-regular	CAR-DOR-CEF	1.103
12-3a-A1-7	10	12	slow-regular	CAR-DOR-CEF	1.253
12-3a-A1-8	10	12	slow-regular	CAR-DOR-CEF	1.227
12-3a-A1-9	10	12	slow-regular	CAR-DOR-CEF	0.845
12-3a-A7-1	9	12	slow-regular	CAR-DOR-CEF	0.954
12-3a-A7-10	9	12	slow-regular	CAR-DOR-CEF	0.767
12-3a-A7-11	9	12	slow-regular	CAR-DOR-CEF	0.995
12-3a-A7-12	9	12	slow-regular	CAR-DOR-CEF	0.729
12-3a-A7-13	9	12	slow-regular	CAR-DOR-CEF	0.949
12-3a-A7-14	9	12	slow-regular	CAR-DOR-CEF	0.909
12-3a-A7-15	9	12	slow-regular	CAR-DOR-CEF	0.892
12-3a-A7-16	9	12	slow-regular	CAR-DOR-CEF	0.761
12-3a-A7-17	9	12	slow-regular	CAR-DOR-CEF	-2.142
12-3a-A7-18	9	12	slow-regular	CAR-DOR-CEF	0.637
12-3a-A7-19	9	12	slow-regular	CAR-DOR-CEF	0.644
12-3a-A7-2	9	12	slow-regular	CAR-DOR-CEF	0.826
12-3a-A7-20	9	12	slow-regular	CAR-DOR-CEF	0.808
12-3a-A7-3	9	12	slow-regular	CAR-DOR-CEF	0.818
12-3a-A7-4	9	12	slow-regular	CAR-DOR-CEF	0.951
12-3a-A7-5	9	12	slow-regular	CAR-DOR-CEF	0.965
12-3a-A7-6	9	12	slow-regular	CAR-DOR-CEF	0.58
12-3a-A7-7	9	12	slow-regular	CAR-DOR-CEF	0.815
12-3a-A7-8	9	12	slow-regular	CAR-DOR-CEF	0.736
12-3a-A7-9	9	12	slow-regular	CAR-DOR-CEF	0.703
12-3a-B1-1	2	12	mono	CAR-DOR-CEF	-0.013
12-3a-B1-10	2	12	mono	CAR-DOR-CEF	-0.041
12-3a-B1-11	2	12	mono	CAR-DOR-CEF	-0.118
12-3a-B1-12	2	12	mono	CAR-DOR-CEF	0.154
12-3a-B1-13	2	12	mono	CAR-DOR-CEF	-0.116
12-3a-B1-14	2	12	mono	CAR-DOR-CEF	0.021
12-3a-B1-15	2	12	mono	CAR-DOR-CEF	-0.018
12-3a-B1-16	2	12	mono	CAR-DOR-CEF	-0.014
12-3a-B1-17	2	12	mono	CAR-DOR-CEF	0.002
12-3a-B1-18	2	12	mono	CAR-DOR-CEF	-0.039
12-3a-B1-19	2	12	mono	CAR-DOR-CEF	-0.17
12-3a-B1-2	2	12	mono	CAR-DOR-CEF	-0.249
12-3a-B1-20	2	12	mono	CAR-DOR-CEF	-0.064
12-3a-B1-3	2	12	mono	CAR-DOR-CEF	-0.183
12-3a-B1-4	2	12	mono	CAR-DOR-CEF	-0.234
12-3a-B1-5	2	12	mono	CAR-DOR-CEF	-0.026
12-3a-B1-6	2	12	mono	CAR-DOR-CEF	0.04
12-3a-B1-7	2	12	mono	CAR-DOR-CEF	0.072
12-3a-B1-8	2	12	mono	CAR-DOR-CEF	0.027
12-3a-B1-9	2	12	mono	CAR-DOR-CEF	-0.106
12-3a-B7-1	8	12	slow-regular	CAR-DOR-CEF	1.493
12-3a-B7-10	8	12	slow-regular	CAR-DOR-CEF	1.733
12-3a-B7-11	8	12	slow-regular	CAR-DOR-CEF	1.383
12-3a-B7-12	8	12	slow-regular	CAR-DOR-CEF	1.278
12-3a-B7-13	8	12	slow-regular	CAR-DOR-CEF	1.253
12-3a-B7-14	8	12	slow-regular	CAR-DOR-CEF	1.531
12-3a-B7-15	8	12	slow-regular	CAR-DOR-CEF	1.713
12-3a-B7-16	8	12	slow-regular	CAR-DOR-CEF	1.144
12-3a-B7-17	8	12	slow-regular	CAR-DOR-CEF	1.153
12-3a-B7-18	8	12	slow-regular	CAR-DOR-CEF	1.488
12-3a-B7-19	8	12	slow-regular	CAR-DOR-CEF	1.31
12-3a-B7-2	8	12	slow-regular	CAR-DOR-CEF	1.381
12-3a-B7-20	8	12	slow-regular	CAR-DOR-CEF	1.299
12-3a-B7-3	8	12	slow-regular	CAR-DOR-CEF	1.567
12-3a-B7-4	8	12	slow-regular	CAR-DOR-CEF	1.517
12-3a-B7-5	8	12	slow-regular	CAR-DOR-CEF	1.604
12-3a-B7-6	8	12	slow-regular	CAR-DOR-CEF	1.28
12-3a-B7-7	8	12	slow-regular	CAR-DOR-CEF	1.476
12-3a-B7-8	8	12	slow-regular	CAR-DOR-CEF	1.524
12-3a-B7-9	8	12	slow-regular	CAR-DOR-CEF	1.392
12-3a-C1-1	6	12	fast-regular	CAR-DOR-CEF	1.364
12-3a-C1-10	6	12	fast-regular	CAR-DOR-CEF	1.254
12-3a-C1-11	6	12	fast-regular	CAR-DOR-CEF	1.281
12-3a-C1-12	6	12	fast-regular	CAR-DOR-CEF	1.252
12-3a-C1-13	6	12	fast-regular	CAR-DOR-CEF	1.451
12-3a-C1-14	6	12	fast-regular	CAR-DOR-CEF	1.549
12-3a-C1-15	6	12	fast-regular	CAR-DOR-CEF	1.537
12-3a-C1-16	6	12	fast-regular	CAR-DOR-CEF	1.205
12-3a-C1-17	6	12	fast-regular	CAR-DOR-CEF	1.486
12-3a-C1-18	6	12	fast-regular	CAR-DOR-CEF	1.42
12-3a-C1-19	6	12	fast-regular	CAR-DOR-CEF	1.189
12-3a-C1-2	6	12	fast-regular	CAR-DOR-CEF	1.394
12-3a-C1-20	6	12	fast-regular	CAR-DOR-CEF	1.281
12-3a-C1-3	6	12	fast-regular	CAR-DOR-CEF	1.2
12-3a-C1-4	6	12	fast-regular	CAR-DOR-CEF	1.292
12-3a-C1-5	6	12	fast-regular	CAR-DOR-CEF	1.189
12-3a-C1-6	6	12	fast-regular	CAR-DOR-CEF	1.294
12-3a-C1-7	6	12	fast-regular	CAR-DOR-CEF	1.21
12-3a-C1-8	6	12	fast-regular	CAR-DOR-CEF	1.458
12-3a-C1-9	6	12	fast-regular	CAR-DOR-CEF	1.187
12-3a-C7-1	11	12	random	CAR-DOR-CEF	1.219
12-3a-C7-10	11	12	random	CAR-DOR-CEF	1.029
12-3a-C7-11	11	12	random	CAR-DOR-CEF	1.254
12-3a-C7-12	11	12	random	CAR-DOR-CEF	1.149
12-3a-C7-13	11	12	random	CAR-DOR-CEF	0.931
12-3a-C7-14	11	12	random	CAR-DOR-CEF	1.283
12-3a-C7-15	11	12	random	CAR-DOR-CEF	1.11
12-3a-C7-16	11	12	random	CAR-DOR-CEF	1.185
12-3a-C7-17	11	12	random	CAR-DOR-CEF	1.039
12-3a-C7-18	11	12	random	CAR-DOR-CEF	1.119
12-3a-C7-19	11	12	random	CAR-DOR-CEF	1.141
12-3a-C7-2	11	12	random	CAR-DOR-CEF	1.171
12-3a-C7-20	11	12	random	CAR-DOR-CEF	0.853
12-3a-C7-3	11	12	random	CAR-DOR-CEF	0.87
12-3a-C7-4	11	12	random	CAR-DOR-CEF	1.067
12-3a-C7-5	11	12	random	CAR-DOR-CEF	1.013
12-3a-C7-6	11	12	random	CAR-DOR-CEF	0.921
12-3a-C7-7	11	12	random	CAR-DOR-CEF	1.218
12-3a-C7-8	11	12	random	CAR-DOR-CEF	0.676
12-3a-C7-9	11	12	random	CAR-DOR-CEF	1.145
12-3a-D1-1	14	12	random	CAR-DOR-CEF	1.385
12-3a-D1-10	14	12	random	CAR-DOR-CEF	1.246
12-3a-D1-11	14	12	random	CAR-DOR-CEF	1.462
12-3a-D1-12	14	12	random	CAR-DOR-CEF	0.992
12-3a-D1-13	14	12	random	CAR-DOR-CEF	1.295
12-3a-D1-14	14	12	random	CAR-DOR-CEF	1.51
12-3a-D1-15	14	12	random	CAR-DOR-CEF	1.632
12-3a-D1-16	14	12	random	CAR-DOR-CEF	1.053
12-3a-D1-17	14	12	random	CAR-DOR-CEF	1.364
12-3a-D1-18	14	12	random	CAR-DOR-CEF	1.153
12-3a-D1-19	14	12	random	CAR-DOR-CEF	1.248
12-3a-D1-2	14	12	random	CAR-DOR-CEF	1.328
12-3a-D1-20	14	12	random	CAR-DOR-CEF	1.326
12-3a-D1-3	14	12	random	CAR-DOR-CEF	1.645
12-3a-D1-4	14	12	random	CAR-DOR-CEF	1.563
12-3a-D1-5	14	12	random	CAR-DOR-CEF	1.544
12-3a-D1-6	14	12	random	CAR-DOR-CEF	1.222
12-3a-D1-7	14	12	random	CAR-DOR-CEF	1.411
12-3a-D1-8	14	12	random	CAR-DOR-CEF	1.382
12-3a-D1-9	14	12	random	CAR-DOR-CEF	1.355
12-3a-D7-1	5	12	fast-regular	CAR-DOR-CEF	1.587
12-3a-D7-10	5	12	fast-regular	CAR-DOR-CEF	1.511
12-3a-D7-11	5	12	fast-regular	CAR-DOR-CEF	1.242
12-3a-D7-12	5	12	fast-regular	CAR-DOR-CEF	1.309
12-3a-D7-13	5	12	fast-regular	CAR-DOR-CEF	1.3
12-3a-D7-14	5	12	fast-regular	CAR-DOR-CEF	1.461
12-3a-D7-15	5	12	fast-regular	CAR-DOR-CEF	1.498
12-3a-D7-16	5	12	fast-regular	CAR-DOR-CEF	1.149
12-3a-D7-17	5	12	fast-regular	CAR-DOR-CEF	1.14
12-3a-D7-18	5	12	fast-regular	CAR-DOR-CEF	1.163
12-3a-D7-19	5	12	fast-regular	CAR-DOR-CEF	1.143
12-3a-D7-2	5	12	fast-regular	CAR-DOR-CEF	1.32
12-3a-D7-20	5	12	fast-regular	CAR-DOR-CEF	1.065
12-3a-D7-3	5	12	fast-regular	CAR-DOR-CEF	1.514
12-3a-D7-4	5	12	fast-regular	CAR-DOR-CEF	1.826
12-3a-D7-5	5	12	fast-regular	CAR-DOR-CEF	1.526
12-3a-D7-6	5	12	fast-regular	CAR-DOR-CEF	1.618
12-3a-D7-7	5	12	fast-regular	CAR-DOR-CEF	1.706
12-3a-D7-8	5	12	fast-regular	CAR-DOR-CEF	1.74
12-3a-D7-9	5	12	fast-regular	CAR-DOR-CEF	1.382
12-3a-E1-1	12	12	random	CAR-DOR-CEF	0.898
12-3a-E1-10	12	12	random	CAR-DOR-CEF	0.574
12-3a-E1-11	12	12	random	CAR-DOR-CEF	1.04
12-3a-E1-12	12	12	random	CAR-DOR-CEF	0.873
12-3a-E1-13	12	12	random	CAR-DOR-CEF	0.821
12-3a-E1-14	12	12	random	CAR-DOR-CEF	1.012
12-3a-E1-15	12	12	random	CAR-DOR-CEF	0.959
12-3a-E1-16	12	12	random	CAR-DOR-CEF	1.183
12-3a-E1-17	12	12	random	CAR-DOR-CEF	0.999
12-3a-E1-18	12	12	random	CAR-DOR-CEF	0.861
12-3a-E1-19	12	12	random	CAR-DOR-CEF	1.08
12-3a-E1-2	12	12	random	CAR-DOR-CEF	0.773
12-3a-E1-20	12	12	random	CAR-DOR-CEF	1.108
12-3a-E1-3	12	12	random	CAR-DOR-CEF	0.641
12-3a-E1-4	12	12	random	CAR-DOR-CEF	0.868
12-3a-E1-5	12	12	random	CAR-DOR-CEF	0.873
12-3a-E1-6	12	12	random	CAR-DOR-CEF	1.002
12-3a-E1-7	12	12	random	CAR-DOR-CEF	0.634
12-3a-E1-8	12	12	random	CAR-DOR-CEF	1.019
12-3a-E1-9	12	12	random	CAR-DOR-CEF	0.641
12-3a-E7-1	3	12	mono	CAR-DOR-CEF	0.648
12-3a-E7-10	3	12	mono	CAR-DOR-CEF	0.606
12-3a-E7-11	3	12	mono	CAR-DOR-CEF	1.062
12-3a-E7-12	3	12	mono	CAR-DOR-CEF	0.857
12-3a-E7-13	3	12	mono	CAR-DOR-CEF	0.825
12-3a-E7-14	3	12	mono	CAR-DOR-CEF	0.905
12-3a-E7-15	3	12	mono	CAR-DOR-CEF	0.838
12-3a-E7-16	3	12	mono	CAR-DOR-CEF	0.829
12-3a-E7-17	3	12	mono	CAR-DOR-CEF	0.778
12-3a-E7-18	3	12	mono	CAR-DOR-CEF	0.787
12-3a-E7-19	3	12	mono	CAR-DOR-CEF	0.631
12-3a-E7-2	3	12	mono	CAR-DOR-CEF	0.591
12-3a-E7-20	3	12	mono	CAR-DOR-CEF	0.957
12-3a-E7-3	3	12	mono	CAR-DOR-CEF	0.612
12-3a-E7-4	3	12	mono	CAR-DOR-CEF	0.564
12-3a-E7-5	3	12	mono	CAR-DOR-CEF	1.491
12-3a-E7-6	3	12	mono	CAR-DOR-CEF	0.548
12-3a-E7-7	3	12	mono	CAR-DOR-CEF	0.6
12-3a-E7-8	3	12	mono	CAR-DOR-CEF	0.563
12-3a-E7-9	3	12	mono	CAR-DOR-CEF	0.572
12-3a-F1-1	7	12	fast-regular	CAR-DOR-CEF	1.854
12-3a-F1-10	7	12	fast-regular	CAR-DOR-CEF	1.745
12-3a-F1-11	7	12	fast-regular	CAR-DOR-CEF	2.053
12-3a-F1-12	7	12	fast-regular	CAR-DOR-CEF	2.478
12-3a-F1-13	7	12	fast-regular	CAR-DOR-CEF	1.946
12-3a-F1-14	7	12	fast-regular	CAR-DOR-CEF	2.068
12-3a-F1-15	7	12	fast-regular	CAR-DOR-CEF	2.218
12-3a-F1-16	7	12	fast-regular	CAR-DOR-CEF	1.687
12-3a-F1-17	7	12	fast-regular	CAR-DOR-CEF	1.73
12-3a-F1-18	7	12	fast-regular	CAR-DOR-CEF	1.944
12-3a-F1-19	7	12	fast-regular	CAR-DOR-CEF	2.152
12-3a-F1-2	7	12	fast-regular	CAR-DOR-CEF	1.71
12-3a-F1-20	7	12	fast-regular	CAR-DOR-CEF	1.907
12-3a-F1-3	7	12	fast-regular	CAR-DOR-CEF	1.566
12-3a-F1-4	7	12	fast-regular	CAR-DOR-CEF	2.066
12-3a-F1-5	7	12	fast-regular	CAR-DOR-CEF	1.848
12-3a-F1-6	7	12	fast-regular	CAR-DOR-CEF	1.891
12-3a-F1-7	7	12	fast-regular	CAR-DOR-CEF	2.132
12-3a-F1-8	7	12	fast-regular	CAR-DOR-CEF	2.049
12-3a-F1-9	7	12	fast-regular	CAR-DOR-CEF	1.815
12-3a-F7-1	4	12	nodrug	CAR-DOR-CEF	0.045
12-3a-F7-10	4	12	nodrug	CAR-DOR-CEF	0.054
12-3a-F7-11	4	12	nodrug	CAR-DOR-CEF	-0.281
12-3a-F7-12	4	12	nodrug	CAR-DOR-CEF	-0.264
12-3a-F7-13	4	12	nodrug	CAR-DOR-CEF	-0.137
12-3a-F7-14	4	12	nodrug	CAR-DOR-CEF	0.056
12-3a-F7-15	4	12	nodrug	CAR-DOR-CEF	-0.246
12-3a-F7-16	4	12	nodrug	CAR-DOR-CEF	-0.412
12-3a-F7-17	4	12	nodrug	CAR-DOR-CEF	-0.156
12-3a-F7-18	4	12	nodrug	CAR-DOR-CEF	-0.241
12-3a-F7-19	4	12	nodrug	CAR-DOR-CEF	-0.138
12-3a-F7-2	4	12	nodrug	CAR-DOR-CEF	-0.029
12-3a-F7-20	4	12	nodrug	CAR-DOR-CEF	-0.363
12-3a-F7-3	4	12	nodrug	CAR-DOR-CEF	-0.002
12-3a-F7-4	4	12	nodrug	CAR-DOR-CEF	0.085
12-3a-F7-5	4	12	nodrug	CAR-DOR-CEF	0.111
12-3a-F7-6	4	12	nodrug	CAR-DOR-CEF	-0.017
12-3a-F7-7	4	12	nodrug	CAR-DOR-CEF	-0.09
12-3a-F7-8	4	12	nodrug	CAR-DOR-CEF	0.118
12-3a-F7-9	4	12	nodrug	CAR-DOR-CEF	-0.159
12-3a-G1-1	13	12	random	CAR-DOR-CEF	1.293
12-3a-G1-10	13	12	random	CAR-DOR-CEF	1.35
12-3a-G1-11	13	12	random	CAR-DOR-CEF	1.087
12-3a-G1-12	13	12	random	CAR-DOR-CEF	1.136
12-3a-G1-13	13	12	random	CAR-DOR-CEF	1.108
12-3a-G1-14	13	12	random	CAR-DOR-CEF	1.275
12-3a-G1-15	13	12	random	CAR-DOR-CEF	0.892
12-3a-G1-16	13	12	random	CAR-DOR-CEF	1.203
12-3a-G1-17	13	12	random	CAR-DOR-CEF	1.225
12-3a-G1-18	13	12	random	CAR-DOR-CEF	1.116
12-3a-G1-19	13	12	random	CAR-DOR-CEF	1.197
12-3a-G1-2	13	12	random	CAR-DOR-CEF	1.128
12-3a-G1-20	13	12	random	CAR-DOR-CEF	1.402
12-3a-G1-3	13	12	random	CAR-DOR-CEF	1.197
12-3a-G1-4	13	12	random	CAR-DOR-CEF	1.341
12-3a-G1-5	13	12	random	CAR-DOR-CEF	1.537
12-3a-G1-6	13	12	random	CAR-DOR-CEF	1.281
12-3a-G1-7	13	12	random	CAR-DOR-CEF	1.239
12-3a-G1-8	13	12	random	CAR-DOR-CEF	1.594
12-3a-G1-9	13	12	random	CAR-DOR-CEF	1.114
12-3a-G7-1	1	12	mono	CAR-DOR-CEF	1.144
12-3a-G7-10	1	12	mono	CAR-DOR-CEF	1.187
12-3a-G7-11	1	12	mono	CAR-DOR-CEF	1.257
12-3a-G7-12	1	12	mono	CAR-DOR-CEF	1.103
12-3a-G7-13	1	12	mono	CAR-DOR-CEF	1.212
12-3a-G7-14	1	12	mono	CAR-DOR-CEF	1.637
12-3a-G7-15	1	12	mono	CAR-DOR-CEF	1.278
12-3a-G7-16	1	12	mono	CAR-DOR-CEF	1.166
12-3a-G7-17	1	12	mono	CAR-DOR-CEF	1.544
12-3a-G7-18	1	12	mono	CAR-DOR-CEF	1.328
12-3a-G7-19	1	12	mono	CAR-DOR-CEF	1.314
12-3a-G7-2	1	12	mono	CAR-DOR-CEF	1.326
12-3a-G7-20	1	12	mono	CAR-DOR-CEF	1.152
12-3a-G7-3	1	12	mono	CAR-DOR-CEF	1.185
12-3a-G7-4	1	12	mono	CAR-DOR-CEF	1.331
12-3a-G7-5	1	12	mono	CAR-DOR-CEF	1.283
12-3a-G7-6	1	12	mono	CAR-DOR-CEF	1.319
12-3a-G7-7	1	12	mono	CAR-DOR-CEF	1.086
12-3a-G7-8	1	12	mono	CAR-DOR-CEF	1.341
12-3a-G7-9	1	12	mono	CAR-DOR-CEF	1.188
12-3a-H3-1	15	12	random	CAR-DOR-CEF	0.294
12-3a-H3-10	15	12	random	CAR-DOR-CEF	0.303
12-3a-H3-11	15	12	random	CAR-DOR-CEF	0.69
12-3a-H3-12	15	12	random	CAR-DOR-CEF	0.71
12-3a-H3-13	15	12	random	CAR-DOR-CEF	0.668
12-3a-H3-14	15	12	random	CAR-DOR-CEF	0.681
12-3a-H3-15	15	12	random	CAR-DOR-CEF	0.616
12-3a-H3-16	15	12	random	CAR-DOR-CEF	0.804
12-3a-H3-17	15	12	random	CAR-DOR-CEF	0.679
12-3a-H3-18	15	12	random	CAR-DOR-CEF	0.698
12-3a-H3-19	15	12	random	CAR-DOR-CEF	1.343
12-3a-H3-2	15	12	random	CAR-DOR-CEF	1.08
12-3a-H3-20	15	12	random	CAR-DOR-CEF	0.549
12-3a-H3-3	15	12	random	CAR-DOR-CEF	0.24
12-3a-H3-4	15	12	random	CAR-DOR-CEF	0.309
12-3a-H3-5	15	12	random	CAR-DOR-CEF	1.001
12-3a-H3-6	15	12	random	CAR-DOR-CEF	0.265
12-3a-H3-7	15	12	random	CAR-DOR-CEF	0.288
12-3a-H3-8	15	12	random	CAR-DOR-CEF	0.527
12-3a-H3-9	15	12	random	CAR-DOR-CEF	0.262
12-3a-H7-1	16	12	random	CAR-DOR-CEF	1.253
12-3a-H7-10	16	12	random	CAR-DOR-CEF	1.234
12-3a-H7-11	16	12	random	CAR-DOR-CEF	0.941
12-3a-H7-12	16	12	random	CAR-DOR-CEF	0.838
12-3a-H7-13	16	12	random	CAR-DOR-CEF	0.881
12-3a-H7-14	16	12	random	CAR-DOR-CEF	1.033
12-3a-H7-15	16	12	random	CAR-DOR-CEF	1.124
12-3a-H7-16	16	12	random	CAR-DOR-CEF	0.731
12-3a-H7-17	16	12	random	CAR-DOR-CEF	0.712
12-3a-H7-18	16	12	random	CAR-DOR-CEF	0.797
12-3a-H7-19	16	12	random	CAR-DOR-CEF	1.225
12-3a-H7-2	16	12	random	CAR-DOR-CEF	1.131
12-3a-H7-20	16	12	random	CAR-DOR-CEF	1.084
12-3a-H7-3	16	12	random	CAR-DOR-CEF	0.952
12-3a-H7-4	16	12	random	CAR-DOR-CEF	1.291
12-3a-H7-5	16	12	random	CAR-DOR-CEF	1.011
12-3a-H7-6	16	12	random	CAR-DOR-CEF	0.938
12-3a-H7-7	16	12	random	CAR-DOR-CEF	1.065
12-3a-H7-8	16	12	random	CAR-DOR-CEF	1.1
12-3a-H7-9	16	12	random	CAR-DOR-CEF	0.638
48-3a-A1-1	9	48	slow-regular	CAR-DOR-CEF	1.476
48-3a-A1-10	9	48	slow-regular	CAR-DOR-CEF	1.163
48-3a-A1-11	9	48	slow-regular	CAR-DOR-CEF	0.999
48-3a-A1-12	9	48	slow-regular	CAR-DOR-CEF	1.308
48-3a-A1-13	9	48	slow-regular	CAR-DOR-CEF	1.324
48-3a-A1-14	9	48	slow-regular	CAR-DOR-CEF	1.565
48-3a-A1-15	9	48	slow-regular	CAR-DOR-CEF	1.521
48-3a-A1-16	9	48	slow-regular	CAR-DOR-CEF	1.479
48-3a-A1-17	9	48	slow-regular	CAR-DOR-CEF	1.462
48-3a-A1-18	9	48	slow-regular	CAR-DOR-CEF	1.536
48-3a-A1-19	9	48	slow-regular	CAR-DOR-CEF	1.718
48-3a-A1-2	9	48	slow-regular	CAR-DOR-CEF	1.263
48-3a-A1-20	9	48	slow-regular	CAR-DOR-CEF	1.29
48-3a-A1-3	9	48	slow-regular	CAR-DOR-CEF	1.36
48-3a-A1-4	9	48	slow-regular	CAR-DOR-CEF	1.784
48-3a-A1-5	9	48	slow-regular	CAR-DOR-CEF	1.596
48-3a-A1-6	9	48	slow-regular	CAR-DOR-CEF	1.278
48-3a-A1-7	9	48	slow-regular	CAR-DOR-CEF	1.141
48-3a-A1-8	9	48	slow-regular	CAR-DOR-CEF	1.208
48-3a-A1-9	9	48	slow-regular	CAR-DOR-CEF	1.3
48-3a-A7-1	10	48	slow-regular	CAR-DOR-CEF	0.91
48-3a-A7-10	10	48	slow-regular	CAR-DOR-CEF	1.025
48-3a-A7-11	10	48	slow-regular	CAR-DOR-CEF	1.055
48-3a-A7-12	10	48	slow-regular	CAR-DOR-CEF	0.679
48-3a-A7-13	10	48	slow-regular	CAR-DOR-CEF	0.637
48-3a-A7-14	10	48	slow-regular	CAR-DOR-CEF	0.682
48-3a-A7-16	10	48	slow-regular	CAR-DOR-CEF	0.604
48-3a-A7-17	10	48	slow-regular	CAR-DOR-CEF	0.755
48-3a-A7-18	10	48	slow-regular	CAR-DOR-CEF	0.973
48-3a-A7-19	10	48	slow-regular	CAR-DOR-CEF	0.612
48-3a-A7-2	10	48	slow-regular	CAR-DOR-CEF	1.041
48-3a-A7-20	10	48	slow-regular	CAR-DOR-CEF	0.611
48-3a-A7-3	10	48	slow-regular	CAR-DOR-CEF	0.771
48-3a-A7-4	10	48	slow-regular	CAR-DOR-CEF	1.358
48-3a-A7-5	10	48	slow-regular	CAR-DOR-CEF	1.477
48-3a-A7-6	10	48	slow-regular	CAR-DOR-CEF	0.774
48-3a-A7-7	10	48	slow-regular	CAR-DOR-CEF	0.974
48-3a-A7-8	10	48	slow-regular	CAR-DOR-CEF	0.845
48-3a-A7-9	10	48	slow-regular	CAR-DOR-CEF	0.834
48-3a-B1-1	2	48	mono	CAR-DOR-CEF	0.829
48-3a-B1-10	2	48	mono	CAR-DOR-CEF	0.771
48-3a-B1-11	2	48	mono	CAR-DOR-CEF	0.731
48-3a-B1-12	2	48	mono	CAR-DOR-CEF	0.561
48-3a-B1-13	2	48	mono	CAR-DOR-CEF	0.487
48-3a-B1-14	2	48	mono	CAR-DOR-CEF	0.524
48-3a-B1-15	2	48	mono	CAR-DOR-CEF	0.782
48-3a-B1-16	2	48	mono	CAR-DOR-CEF	0.895
48-3a-B1-17	2	48	mono	CAR-DOR-CEF	1.654
48-3a-B1-18	2	48	mono	CAR-DOR-CEF	0.97
48-3a-B1-19	2	48	mono	CAR-DOR-CEF	0.867
48-3a-B1-2	2	48	mono	CAR-DOR-CEF	0.8
48-3a-B1-20	2	48	mono	CAR-DOR-CEF	0.958
48-3a-B1-3	2	48	mono	CAR-DOR-CEF	0.797
48-3a-B1-4	2	48	mono	CAR-DOR-CEF	0.784
48-3a-B1-5	2	48	mono	CAR-DOR-CEF	0.339
48-3a-B1-6	2	48	mono	CAR-DOR-CEF	0.851
48-3a-B1-7	2	48	mono	CAR-DOR-CEF	0.497
48-3a-B1-8	2	48	mono	CAR-DOR-CEF	0.799
48-3a-B1-9	2	48	mono	CAR-DOR-CEF	0.756
48-3a-B7star-1	8	48	slow-regular	CAR-DOR-CEF	1.077
48-3a-B7star-10	8	48	slow-regular	CAR-DOR-CEF	1.027
48-3a-B7star-11	8	48	slow-regular	CAR-DOR-CEF	1.043
48-3a-B7star-12	8	48	slow-regular	CAR-DOR-CEF	1.062
48-3a-B7star-13	8	48	slow-regular	CAR-DOR-CEF	1.071
48-3a-B7star-14	8	48	slow-regular	CAR-DOR-CEF	1.089
48-3a-B7star-15	8	48	slow-regular	CAR-DOR-CEF	-0.98
48-3a-B7star-16	8	48	slow-regular	CAR-DOR-CEF	1.011
48-3a-B7star-17	8	48	slow-regular	CAR-DOR-CEF	1.063
48-3a-B7star-18	8	48	slow-regular	CAR-DOR-CEF	1.148
48-3a-B7star-19	8	48	slow-regular	CAR-DOR-CEF	1.035
48-3a-B7star-2	8	48	slow-regular	CAR-DOR-CEF	1.126
48-3a-B7star-20	8	48	slow-regular	CAR-DOR-CEF	1.011
48-3a-B7star-3	8	48	slow-regular	CAR-DOR-CEF	1.056
48-3a-B7star-4	8	48	slow-regular	CAR-DOR-CEF	-0.542
48-3a-B7star-5	8	48	slow-regular	CAR-DOR-CEF	1.19
48-3a-B7star-6	8	48	slow-regular	CAR-DOR-CEF	1.046
48-3a-B7star-7	8	48	slow-regular	CAR-DOR-CEF	1.007
48-3a-B7star-8	8	48	slow-regular	CAR-DOR-CEF	1.096
48-3a-B7star-9	8	48	slow-regular	CAR-DOR-CEF	0.804
48-3a-C1-1	6	48	fast-regular	CAR-DOR-CEF	1.87
48-3a-C1-10	6	48	fast-regular	CAR-DOR-CEF	1.834
48-3a-C1-11	6	48	fast-regular	CAR-DOR-CEF	1.75
48-3a-C1-12	6	48	fast-regular	CAR-DOR-CEF	1.723
48-3a-C1-13	6	48	fast-regular	CAR-DOR-CEF	1.671
48-3a-C1-14	6	48	fast-regular	CAR-DOR-CEF	1.852
48-3a-C1-15	6	48	fast-regular	CAR-DOR-CEF	1.913
48-3a-C1-16	6	48	fast-regular	CAR-DOR-CEF	1.796
48-3a-C1-17	6	48	fast-regular	CAR-DOR-CEF	1.706
48-3a-C1-18	6	48	fast-regular	CAR-DOR-CEF	2.277
48-3a-C1-19	6	48	fast-regular	CAR-DOR-CEF	1.781
48-3a-C1-2	6	48	fast-regular	CAR-DOR-CEF	2.152
48-3a-C1-20	6	48	fast-regular	CAR-DOR-CEF	1.953
48-3a-C1-3	6	48	fast-regular	CAR-DOR-CEF	1.823
48-3a-C1-4	6	48	fast-regular	CAR-DOR-CEF	1.714
48-3a-C1-5	6	48	fast-regular	CAR-DOR-CEF	1.892
48-3a-C1-6	6	48	fast-regular	CAR-DOR-CEF	1.74
48-3a-C1-7	6	48	fast-regular	CAR-DOR-CEF	2.512
48-3a-C1-8	6	48	fast-regular	CAR-DOR-CEF	1.951
48-3a-C1-9	6	48	fast-regular	CAR-DOR-CEF	1.681
48-3a-C7-1	11	48	random	CAR-DOR-CEF	0.9
48-3a-C7-10	11	48	random	CAR-DOR-CEF	1.147
48-3a-C7-11	11	48	random	CAR-DOR-CEF	1.024
48-3a-C7-12	11	48	random	CAR-DOR-CEF	1.183
48-3a-C7-13	11	48	random	CAR-DOR-CEF	1.204
48-3a-C7-14	11	48	random	CAR-DOR-CEF	1.178
48-3a-C7-15	11	48	random	CAR-DOR-CEF	0.101
48-3a-C7-16	11	48	random	CAR-DOR-CEF	1.08
48-3a-C7-17	11	48	random	CAR-DOR-CEF	1.061
48-3a-C7-18	11	48	random	CAR-DOR-CEF	1.078
48-3a-C7-19	11	48	random	CAR-DOR-CEF	0.995
48-3a-C7-2	11	48	random	CAR-DOR-CEF	-0.394
48-3a-C7-20	11	48	random	CAR-DOR-CEF	1.043
48-3a-C7-3	11	48	random	CAR-DOR-CEF	1.003
48-3a-C7-4	11	48	random	CAR-DOR-CEF	1.109
48-3a-C7-5	11	48	random	CAR-DOR-CEF	1.09
48-3a-C7-6	11	48	random	CAR-DOR-CEF	0.875
48-3a-C7-7	11	48	random	CAR-DOR-CEF	1.065
48-3a-C7-8	11	48	random	CAR-DOR-CEF	0.938
48-3a-C7-9	11	48	random	CAR-DOR-CEF	0.81
48-3a-D1-1	14	48	random	CAR-DOR-CEF	1.792
48-3a-D1-10	14	48	random	CAR-DOR-CEF	1.402
48-3a-D1-11	14	48	random	CAR-DOR-CEF	1.172
48-3a-D1-12	14	48	random	CAR-DOR-CEF	0.941
48-3a-D1-13	14	48	random	CAR-DOR-CEF	1.649
48-3a-D1-14	14	48	random	CAR-DOR-CEF	1.416
48-3a-D1-15	14	48	random	CAR-DOR-CEF	1.94
48-3a-D1-16	14	48	random	CAR-DOR-CEF	1.381
48-3a-D1-17	14	48	random	CAR-DOR-CEF	1.417
48-3a-D1-18	14	48	random	CAR-DOR-CEF	1.467
48-3a-D1-19	14	48	random	CAR-DOR-CEF	1.314
48-3a-D1-2	14	48	random	CAR-DOR-CEF	0.982
48-3a-D1-20	14	48	random	CAR-DOR-CEF	-0.128
48-3a-D1-3	14	48	random	CAR-DOR-CEF	-0.127
48-3a-D1-4	14	48	random	CAR-DOR-CEF	2.016
48-3a-D1-5	14	48	random	CAR-DOR-CEF	1.498
48-3a-D1-6	14	48	random	CAR-DOR-CEF	1.477
48-3a-D1-7	14	48	random	CAR-DOR-CEF	-0.015
48-3a-D1-8	14	48	random	CAR-DOR-CEF	1.561
48-3a-D1-9	14	48	random	CAR-DOR-CEF	0.882
48-3a-D7-1	5	48	fast-regular	CAR-DOR-CEF	0.993
48-3a-D7-10	5	48	fast-regular	CAR-DOR-CEF	1.149
48-3a-D7-11	5	48	fast-regular	CAR-DOR-CEF	1.113
48-3a-D7-12	5	48	fast-regular	CAR-DOR-CEF	1.112
48-3a-D7-13	5	48	fast-regular	CAR-DOR-CEF	1.131
48-3a-D7-14	5	48	fast-regular	CAR-DOR-CEF	1.08
48-3a-D7-15	5	48	fast-regular	CAR-DOR-CEF	1.147
48-3a-D7-16	5	48	fast-regular	CAR-DOR-CEF	1.045
48-3a-D7-17	5	48	fast-regular	CAR-DOR-CEF	1.241
48-3a-D7-18	5	48	fast-regular	CAR-DOR-CEF	1.149
48-3a-D7-19	5	48	fast-regular	CAR-DOR-CEF	1.173
48-3a-D7-2	5	48	fast-regular	CAR-DOR-CEF	0.76
48-3a-D7-20	5	48	fast-regular	CAR-DOR-CEF	1.232
48-3a-D7-3	5	48	fast-regular	CAR-DOR-CEF	1.083
48-3a-D7-4	5	48	fast-regular	CAR-DOR-CEF	1.266
48-3a-D7-5	5	48	fast-regular	CAR-DOR-CEF	1.296
48-3a-D7-6	5	48	fast-regular	CAR-DOR-CEF	1.016
48-3a-D7-7	5	48	fast-regular	CAR-DOR-CEF	1.064
48-3a-D7-8	5	48	fast-regular	CAR-DOR-CEF	1.322
48-3a-D7-9	5	48	fast-regular	CAR-DOR-CEF	1.101
48-3a-E1-1	12	48	random	CAR-DOR-CEF	1.953
48-3a-E1-10	12	48	random	CAR-DOR-CEF	1.8
48-3a-E1-11	12	48	random	CAR-DOR-CEF	1.747
48-3a-E1-12	12	48	random	CAR-DOR-CEF	1.653
48-3a-E1-13	12	48	random	CAR-DOR-CEF	1.801
48-3a-E1-14	12	48	random	CAR-DOR-CEF	1.634
48-3a-E1-15	12	48	random	CAR-DOR-CEF	1.681
48-3a-E1-16	12	48	random	CAR-DOR-CEF	1.472
48-3a-E1-17	12	48	random	CAR-DOR-CEF	1.618
48-3a-E1-18	12	48	random	CAR-DOR-CEF	1.391
48-3a-E1-19	12	48	random	CAR-DOR-CEF	1.561
48-3a-E1-2	12	48	random	CAR-DOR-CEF	1.775
48-3a-E1-20	12	48	random	CAR-DOR-CEF	1.658
48-3a-E1-3	12	48	random	CAR-DOR-CEF	1.76
48-3a-E1-4	12	48	random	CAR-DOR-CEF	1.987
48-3a-E1-5	12	48	random	CAR-DOR-CEF	1.981
48-3a-E1-6	12	48	random	CAR-DOR-CEF	1.714
48-3a-E1-7	12	48	random	CAR-DOR-CEF	2.002
48-3a-E1-8	12	48	random	CAR-DOR-CEF	2.381
48-3a-E1-9	12	48	random	CAR-DOR-CEF	1.754
48-3a-E7star-1	3	48	mono	CAR-DOR-CEF	-0.323
48-3a-E7star-10	3	48	mono	CAR-DOR-CEF	0.166
48-3a-E7star-11	3	48	mono	CAR-DOR-CEF	0.495
48-3a-E7star-12	3	48	mono	CAR-DOR-CEF	-0.276
48-3a-E7star-13	3	48	mono	CAR-DOR-CEF	0.365
48-3a-E7star-14	3	48	mono	CAR-DOR-CEF	0.51
48-3a-E7star-15	3	48	mono	CAR-DOR-CEF	0.474
48-3a-E7star-16	3	48	mono	CAR-DOR-CEF	-0.145
48-3a-E7star-17	3	48	mono	CAR-DOR-CEF	0.462
48-3a-E7star-18	3	48	mono	CAR-DOR-CEF	0.422
48-3a-E7star-19	3	48	mono	CAR-DOR-CEF	0.348
48-3a-E7star-2	3	48	mono	CAR-DOR-CEF	0.321
48-3a-E7star-20	3	48	mono	CAR-DOR-CEF	0.478
48-3a-E7star-3	3	48	mono	CAR-DOR-CEF	-0.088
48-3a-E7star-4	3	48	mono	CAR-DOR-CEF	0.48
48-3a-E7star-5	3	48	mono	CAR-DOR-CEF	0.479
48-3a-E7star-6	3	48	mono	CAR-DOR-CEF	-0.119
48-3a-E7star-7	3	48	mono	CAR-DOR-CEF	0.358
48-3a-E7star-8	3	48	mono	CAR-DOR-CEF	0.169
48-3a-E7star-9	3	48	mono	CAR-DOR-CEF	0.289
48-3a-F1-1	7	48	fast-regular	CAR-DOR-CEF	1.096
48-3a-F1-10	7	48	fast-regular	CAR-DOR-CEF	1.119
48-3a-F1-11	7	48	fast-regular	CAR-DOR-CEF	1.514
48-3a-F1-12	7	48	fast-regular	CAR-DOR-CEF	1.116
48-3a-F1-13	7	48	fast-regular	CAR-DOR-CEF	1.357
48-3a-F1-14	7	48	fast-regular	CAR-DOR-CEF	1.11
48-3a-F1-15	7	48	fast-regular	CAR-DOR-CEF	1.146
48-3a-F1-16	7	48	fast-regular	CAR-DOR-CEF	1.031
48-3a-F1-17	7	48	fast-regular	CAR-DOR-CEF	1.077
48-3a-F1-18	7	48	fast-regular	CAR-DOR-CEF	1.277
48-3a-F1-19	7	48	fast-regular	CAR-DOR-CEF	1.033
48-3a-F1-2	7	48	fast-regular	CAR-DOR-CEF	1.113
48-3a-F1-20	7	48	fast-regular	CAR-DOR-CEF	0.913
48-3a-F1-3	7	48	fast-regular	CAR-DOR-CEF	1.044
48-3a-F1-4	7	48	fast-regular	CAR-DOR-CEF	1.053
48-3a-F1-5	7	48	fast-regular	CAR-DOR-CEF	1.072
48-3a-F1-6	7	48	fast-regular	CAR-DOR-CEF	1.147
48-3a-F1-7	7	48	fast-regular	CAR-DOR-CEF	0.988
48-3a-F1-8	7	48	fast-regular	CAR-DOR-CEF	1.198
48-3a-F1-9	7	48	fast-regular	CAR-DOR-CEF	0.897
48-3a-F7-1	4	48	nodrug	CAR-DOR-CEF	0.183
48-3a-F7-10	4	48	nodrug	CAR-DOR-CEF	0.155
48-3a-F7-11	4	48	nodrug	CAR-DOR-CEF	0.155
48-3a-F7-12	4	48	nodrug	CAR-DOR-CEF	0.142
48-3a-F7-13	4	48	nodrug	CAR-DOR-CEF	0.167
48-3a-F7-14	4	48	nodrug	CAR-DOR-CEF	0.226
48-3a-F7-15	4	48	nodrug	CAR-DOR-CEF	0.115
48-3a-F7-16	4	48	nodrug	CAR-DOR-CEF	0.106
48-3a-F7-17	4	48	nodrug	CAR-DOR-CEF	0.1
48-3a-F7-18	4	48	nodrug	CAR-DOR-CEF	0.316
48-3a-F7-19	4	48	nodrug	CAR-DOR-CEF	0.274
48-3a-F7-2	4	48	nodrug	CAR-DOR-CEF	0.338
48-3a-F7-20	4	48	nodrug	CAR-DOR-CEF	0.117
48-3a-F7-3	4	48	nodrug	CAR-DOR-CEF	0.112
48-3a-F7-4	4	48	nodrug	CAR-DOR-CEF	0.364
48-3a-F7-5	4	48	nodrug	CAR-DOR-CEF	0.082
48-3a-F7-6	4	48	nodrug	CAR-DOR-CEF	0.086
48-3a-F7-7	4	48	nodrug	CAR-DOR-CEF	0.066
48-3a-F7-8	4	48	nodrug	CAR-DOR-CEF	0.058
48-3a-F7-9	4	48	nodrug	CAR-DOR-CEF	0.03
48-3a-G1-1	13	48	random	CAR-DOR-CEF	0.638
48-3a-G1-10	13	48	random	CAR-DOR-CEF	0.256
48-3a-G1-11	13	48	random	CAR-DOR-CEF	0.457
48-3a-G1-12	13	48	random	CAR-DOR-CEF	0.36
48-3a-G1-13	13	48	random	CAR-DOR-CEF	0.41
48-3a-G1-14	13	48	random	CAR-DOR-CEF	0.418
48-3a-G1-15	13	48	random	CAR-DOR-CEF	0.593
48-3a-G1-16	13	48	random	CAR-DOR-CEF	0.654
48-3a-G1-17	13	48	random	CAR-DOR-CEF	1.092
48-3a-G1-18	13	48	random	CAR-DOR-CEF	0.353
48-3a-G1-19	13	48	random	CAR-DOR-CEF	0.344
48-3a-G1-2	13	48	random	CAR-DOR-CEF	0.243
48-3a-G1-20	13	48	random	CAR-DOR-CEF	0.542
48-3a-G1-3	13	48	random	CAR-DOR-CEF	0.364
48-3a-G1-4	13	48	random	CAR-DOR-CEF	0.493
48-3a-G1-5	13	48	random	CAR-DOR-CEF	0.409
48-3a-G1-6	13	48	random	CAR-DOR-CEF	0.217
48-3a-G1-7	13	48	random	CAR-DOR-CEF	0.308
48-3a-G1-8	13	48	random	CAR-DOR-CEF	0.876
48-3a-G1-9	13	48	random	CAR-DOR-CEF	0.338
48-3a-G7-1	1	48	mono	CAR-DOR-CEF	0.952
48-3a-G7-10	1	48	mono	CAR-DOR-CEF	0.934
48-3a-G7-11	1	48	mono	CAR-DOR-CEF	0.872
48-3a-G7-12	1	48	mono	CAR-DOR-CEF	1.832
48-3a-G7-13	1	48	mono	CAR-DOR-CEF	0.985
48-3a-G7-14	1	48	mono	CAR-DOR-CEF	1.966
48-3a-G7-15	1	48	mono	CAR-DOR-CEF	1.903
48-3a-G7-16	1	48	mono	CAR-DOR-CEF	0.882
48-3a-G7-17	1	48	mono	CAR-DOR-CEF	1.857
48-3a-G7-18	1	48	mono	CAR-DOR-CEF	0.971
48-3a-G7-19	1	48	mono	CAR-DOR-CEF	1.709
48-3a-G7-2	1	48	mono	CAR-DOR-CEF	0.895
48-3a-G7-20	1	48	mono	CAR-DOR-CEF	0.857
48-3a-G7-3	1	48	mono	CAR-DOR-CEF	1.878
48-3a-G7-4	1	48	mono	CAR-DOR-CEF	1.935
48-3a-G7-5	1	48	mono	CAR-DOR-CEF	0.891
48-3a-G7-6	1	48	mono	CAR-DOR-CEF	1.728
48-3a-G7-7	1	48	mono	CAR-DOR-CEF	1.847
48-3a-G7-8	1	48	mono	CAR-DOR-CEF	1.211
48-3a-G7-9	1	48	mono	CAR-DOR-CEF	0.88
48-3a-H3-1	15	48	random	CAR-DOR-CEF	1.025
48-3a-H3-10	15	48	random	CAR-DOR-CEF	0.972
48-3a-H3-11	15	48	random	CAR-DOR-CEF	1.109
48-3a-H3-12	15	48	random	CAR-DOR-CEF	1.085
48-3a-H3-13	15	48	random	CAR-DOR-CEF	1.113
48-3a-H3-14	15	48	random	CAR-DOR-CEF	1.085
48-3a-H3-15	15	48	random	CAR-DOR-CEF	1.047
48-3a-H3-16	15	48	random	CAR-DOR-CEF	1.086
48-3a-H3-17	15	48	random	CAR-DOR-CEF	1.012
48-3a-H3-18	15	48	random	CAR-DOR-CEF	0.982
48-3a-H3-19	15	48	random	CAR-DOR-CEF	0.96
48-3a-H3-2	15	48	random	CAR-DOR-CEF	0.888
48-3a-H3-20	15	48	random	CAR-DOR-CEF	0.917
48-3a-H3-3	15	48	random	CAR-DOR-CEF	0.962
48-3a-H3-4	15	48	random	CAR-DOR-CEF	1.076
48-3a-H3-5	15	48	random	CAR-DOR-CEF	0.966
48-3a-H3-6	15	48	random	CAR-DOR-CEF	0.998
48-3a-H3-7	15	48	random	CAR-DOR-CEF	0.793
48-3a-H3-8	15	48	random	CAR-DOR-CEF	1.02
48-3a-H3-9	15	48	random	CAR-DOR-CEF	0.933
48-3a-H7-1	16	48	random	CAR-DOR-CEF	1.255
48-3a-H7-10	16	48	random	CAR-DOR-CEF	0.554
48-3a-H7-11	16	48	random	CAR-DOR-CEF	0.893
48-3a-H7-12	16	48	random	CAR-DOR-CEF	0.528
48-3a-H7-13	16	48	random	CAR-DOR-CEF	0.865
48-3a-H7-14	16	48	random	CAR-DOR-CEF	0.569
48-3a-H7-15	16	48	random	CAR-DOR-CEF	0.671
48-3a-H7-16	16	48	random	CAR-DOR-CEF	0.482
48-3a-H7-17	16	48	random	CAR-DOR-CEF	0.556
48-3a-H7-18	16	48	random	CAR-DOR-CEF	0.881
48-3a-H7-19	16	48	random	CAR-DOR-CEF	0.853
48-3a-H7-2	16	48	random	CAR-DOR-CEF	0.436
48-3a-H7-20	16	48	random	CAR-DOR-CEF	0.654
48-3a-H7-3	16	48	random	CAR-DOR-CEF	0.558
48-3a-H7-4	16	48	random	CAR-DOR-CEF	0.838
48-3a-H7-5	16	48	random	CAR-DOR-CEF	0.698
48-3a-H7-6	16	48	random	CAR-DOR-CEF	0.636
48-3a-H7-7	16	48	random	CAR-DOR-CEF	0.431
48-3a-H7-8	16	48	random	CAR-DOR-CEF	1.158
48-3a-H7-9	16	48	random	CAR-DOR-CEF	0.582
12-3a-A1-1	10	12	slow-regular	CIP-GEN	0.155
12-3a-A1-10	10	12	slow-regular	CIP-GEN	0.238
12-3a-A1-11	10	12	slow-regular	CIP-GEN	-0.03
12-3a-A1-12	10	12	slow-regular	CIP-GEN	-0.191
12-3a-A1-13	10	12	slow-regular	CIP-GEN	-0.157
12-3a-A1-14	10	12	slow-regular	CIP-GEN	-0.165
12-3a-A1-15	10	12	slow-regular	CIP-GEN	0.025
12-3a-A1-16	10	12	slow-regular	CIP-GEN	-0.216
12-3a-A1-17	10	12	slow-regular	CIP-GEN	0.05
12-3a-A1-18	10	12	slow-regular	CIP-GEN	-0.1
12-3a-A1-19	10	12	slow-regular	CIP-GEN	-0.231
12-3a-A1-2	10	12	slow-regular	CIP-GEN	0.194
12-3a-A1-20	10	12	slow-regular	CIP-GEN	-0.156
12-3a-A1-3	10	12	slow-regular	CIP-GEN	0.158
12-3a-A1-4	10	12	slow-regular	CIP-GEN	0.253
12-3a-A1-5	10	12	slow-regular	CIP-GEN	0.178
12-3a-A1-6	10	12	slow-regular	CIP-GEN	0.093
12-3a-A1-7	10	12	slow-regular	CIP-GEN	0.202
12-3a-A1-8	10	12	slow-regular	CIP-GEN	-0.033
12-3a-A1-9	10	12	slow-regular	CIP-GEN	0.077
12-3a-A7-1	9	12	slow-regular	CIP-GEN	-0.059
12-3a-A7-10	9	12	slow-regular	CIP-GEN	-0.093
12-3a-A7-11	9	12	slow-regular	CIP-GEN	0.153
12-3a-A7-12	9	12	slow-regular	CIP-GEN	0.087
12-3a-A7-13	9	12	slow-regular	CIP-GEN	0.103
12-3a-A7-14	9	12	slow-regular	CIP-GEN	0.032
12-3a-A7-15	9	12	slow-regular	CIP-GEN	0.05
12-3a-A7-16	9	12	slow-regular	CIP-GEN	-0.06
12-3a-A7-17	9	12	slow-regular	CIP-GEN	-1.65
12-3a-A7-18	9	12	slow-regular	CIP-GEN	-0.026
12-3a-A7-19	9	12	slow-regular	CIP-GEN	-0.027
12-3a-A7-2	9	12	slow-regular	CIP-GEN	-0.074
12-3a-A7-20	9	12	slow-regular	CIP-GEN	-0.028
12-3a-A7-3	9	12	slow-regular	CIP-GEN	-0.119
12-3a-A7-4	9	12	slow-regular	CIP-GEN	-0.071
12-3a-A7-5	9	12	slow-regular	CIP-GEN	-0.103
12-3a-A7-6	9	12	slow-regular	CIP-GEN	-0.093
12-3a-A7-7	9	12	slow-regular	CIP-GEN	0.031
12-3a-A7-8	9	12	slow-regular	CIP-GEN	-0.117
12-3a-A7-9	9	12	slow-regular	CIP-GEN	-0.124
12-3a-B1-1	2	12	mono	CIP-GEN	-0.013
12-3a-B1-10	2	12	mono	CIP-GEN	0.049
12-3a-B1-11	2	12	mono	CIP-GEN	0.069
12-3a-B1-12	2	12	mono	CIP-GEN	-0.182
12-3a-B1-13	2	12	mono	CIP-GEN	-0.2
12-3a-B1-14	2	12	mono	CIP-GEN	-0.087
12-3a-B1-15	2	12	mono	CIP-GEN	-0.059
12-3a-B1-16	2	12	mono	CIP-GEN	-0.107
12-3a-B1-17	2	12	mono	CIP-GEN	-0.055
12-3a-B1-18	2	12	mono	CIP-GEN	-0.161
12-3a-B1-19	2	12	mono	CIP-GEN	-0.153
12-3a-B1-2	2	12	mono	CIP-GEN	-0.072
12-3a-B1-20	2	12	mono	CIP-GEN	-0.104
12-3a-B1-3	2	12	mono	CIP-GEN	-0.119
12-3a-B1-4	2	12	mono	CIP-GEN	-0.088
12-3a-B1-5	2	12	mono	CIP-GEN	-0.089
12-3a-B1-6	2	12	mono	CIP-GEN	-0.12
12-3a-B1-7	2	12	mono	CIP-GEN	-0.116
12-3a-B1-8	2	12	mono	CIP-GEN	-0.104
12-3a-B1-9	2	12	mono	CIP-GEN	-0.121
12-3a-B7-1	8	12	slow-regular	CIP-GEN	0.067
12-3a-B7-10	8	12	slow-regular	CIP-GEN	-0.098
12-3a-B7-11	8	12	slow-regular	CIP-GEN	-0.236
12-3a-B7-12	8	12	slow-regular	CIP-GEN	-0.139
12-3a-B7-13	8	12	slow-regular	CIP-GEN	-0.245
12-3a-B7-14	8	12	slow-regular	CIP-GEN	-0.144
12-3a-B7-15	8	12	slow-regular	CIP-GEN	-0.134
12-3a-B7-16	8	12	slow-regular	CIP-GEN	-0.25
12-3a-B7-17	8	12	slow-regular	CIP-GEN	-0.181
12-3a-B7-18	8	12	slow-regular	CIP-GEN	-0.228
12-3a-B7-19	8	12	slow-regular	CIP-GEN	-0.194
12-3a-B7-2	8	12	slow-regular	CIP-GEN	-0.035
12-3a-B7-20	8	12	slow-regular	CIP-GEN	-0.156
12-3a-B7-3	8	12	slow-regular	CIP-GEN	-0.082
12-3a-B7-4	8	12	slow-regular	CIP-GEN	-0.029
12-3a-B7-5	8	12	slow-regular	CIP-GEN	-0.065
12-3a-B7-6	8	12	slow-regular	CIP-GEN	-0.08
12-3a-B7-7	8	12	slow-regular	CIP-GEN	-0.015
12-3a-B7-8	8	12	slow-regular	CIP-GEN	-0.126
12-3a-B7-9	8	12	slow-regular	CIP-GEN	-0.054
12-3a-C1-1	6	12	fast-regular	CIP-GEN	0.538
12-3a-C1-10	6	12	fast-regular	CIP-GEN	0.491
12-3a-C1-11	6	12	fast-regular	CIP-GEN	0.481
12-3a-C1-12	6	12	fast-regular	CIP-GEN	0.443
12-3a-C1-13	6	12	fast-regular	CIP-GEN	0.34
12-3a-C1-14	6	12	fast-regular	CIP-GEN	0.492
12-3a-C1-15	6	12	fast-regular	CIP-GEN	0.638
12-3a-C1-16	6	12	fast-regular	CIP-GEN	0.464
12-3a-C1-17	6	12	fast-regular	CIP-GEN	0.544
12-3a-C1-18	6	12	fast-regular	CIP-GEN	0.33
12-3a-C1-19	6	12	fast-regular	CIP-GEN	0.457
12-3a-C1-2	6	12	fast-regular	CIP-GEN	0.385
12-3a-C1-20	6	12	fast-regular	CIP-GEN	0.367
12-3a-C1-3	6	12	fast-regular	CIP-GEN	0.454
12-3a-C1-4	6	12	fast-regular	CIP-GEN	0.492
12-3a-C1-5	6	12	fast-regular	CIP-GEN	0.578
12-3a-C1-6	6	12	fast-regular	CIP-GEN	0.301
12-3a-C1-7	6	12	fast-regular	CIP-GEN	0.522
12-3a-C1-8	6	12	fast-regular	CIP-GEN	0.467
12-3a-C1-9	6	12	fast-regular	CIP-GEN	0.319
12-3a-C7-1	11	12	random	CIP-GEN	-0.089
12-3a-C7-10	11	12	random	CIP-GEN	-0.22
12-3a-C7-11	11	12	random	CIP-GEN	-0.182
12-3a-C7-12	11	12	random	CIP-GEN	-0.299
12-3a-C7-13	11	12	random	CIP-GEN	-0.247
12-3a-C7-14	11	12	random	CIP-GEN	-0.211
12-3a-C7-15	11	12	random	CIP-GEN	-0.301
12-3a-C7-16	11	12	random	CIP-GEN	-0.283
12-3a-C7-17	11	12	random	CIP-GEN	-0.161
12-3a-C7-18	11	12	random	CIP-GEN	-0.242
12-3a-C7-19	11	12	random	CIP-GEN	-0.287
12-3a-C7-2	11	12	random	CIP-GEN	-0.241
12-3a-C7-20	11	12	random	CIP-GEN	-0.25
12-3a-C7-3	11	12	random	CIP-GEN	-0.267
12-3a-C7-4	11	12	random	CIP-GEN	-0.191
12-3a-C7-5	11	12	random	CIP-GEN	-0.251
12-3a-C7-6	11	12	random	CIP-GEN	-0.291
12-3a-C7-7	11	12	random	CIP-GEN	-0.219
12-3a-C7-8	11	12	random	CIP-GEN	-0.076
12-3a-C7-9	11	12	random	CIP-GEN	-0.185
12-3a-D1-1	14	12	random	CIP-GEN	-0.081
12-3a-D1-10	14	12	random	CIP-GEN	-0.239
12-3a-D1-11	14	12	random	CIP-GEN	-0.083
12-3a-D1-12	14	12	random	CIP-GEN	-0.069
12-3a-D1-13	14	12	random	CIP-GEN	-0.168
12-3a-D1-14	14	12	random	CIP-GEN	-0.006
12-3a-D1-15	14	12	random	CIP-GEN	-0.123
12-3a-D1-16	14	12	random	CIP-GEN	-0.145
12-3a-D1-17	14	12	random	CIP-GEN	-0.12
12-3a-D1-18	14	12	random	CIP-GEN	-0.054
12-3a-D1-19	14	12	random	CIP-GEN	0.04
12-3a-D1-2	14	12	random	CIP-GEN	-0.045
12-3a-D1-20	14	12	random	CIP-GEN	-0.238
12-3a-D1-3	14	12	random	CIP-GEN	0.052
12-3a-D1-4	14	12	random	CIP-GEN	-0.071
12-3a-D1-5	14	12	random	CIP-GEN	-0.099
12-3a-D1-6	14	12	random	CIP-GEN	-0.139
12-3a-D1-7	14	12	random	CIP-GEN	-0.25
12-3a-D1-8	14	12	random	CIP-GEN	-0.089
12-3a-D1-9	14	12	random	CIP-GEN	-0.042
12-3a-D7-1	5	12	fast-regular	CIP-GEN	-0.003
12-3a-D7-10	5	12	fast-regular	CIP-GEN	-0.07
12-3a-D7-11	5	12	fast-regular	CIP-GEN	-0.078
12-3a-D7-12	5	12	fast-regular	CIP-GEN	-0.066
12-3a-D7-13	5	12	fast-regular	CIP-GEN	-0.068
12-3a-D7-14	5	12	fast-regular	CIP-GEN	-0.002
12-3a-D7-15	5	12	fast-regular	CIP-GEN	-0.038
12-3a-D7-16	5	12	fast-regular	CIP-GEN	-0.017
12-3a-D7-17	5	12	fast-regular	CIP-GEN	-0.141
12-3a-D7-18	5	12	fast-regular	CIP-GEN	-0.045
12-3a-D7-19	5	12	fast-regular	CIP-GEN	-0.143
12-3a-D7-2	5	12	fast-regular	CIP-GEN	-0.063
12-3a-D7-20	5	12	fast-regular	CIP-GEN	-0.178
12-3a-D7-3	5	12	fast-regular	CIP-GEN	-0.013
12-3a-D7-4	5	12	fast-regular	CIP-GEN	-0.035
12-3a-D7-5	5	12	fast-regular	CIP-GEN	-0.034
12-3a-D7-6	5	12	fast-regular	CIP-GEN	-0.039
12-3a-D7-7	5	12	fast-regular	CIP-GEN	-0.155
12-3a-D7-8	5	12	fast-regular	CIP-GEN	-0.028
12-3a-D7-9	5	12	fast-regular	CIP-GEN	-0.198
12-3a-E1-1	12	12	random	CIP-GEN	0.343
12-3a-E1-10	12	12	random	CIP-GEN	0.03
12-3a-E1-11	12	12	random	CIP-GEN	0.689
12-3a-E1-12	12	12	random	CIP-GEN	0.265
12-3a-E1-13	12	12	random	CIP-GEN	0.23
12-3a-E1-14	12	12	random	CIP-GEN	0.485
12-3a-E1-15	12	12	random	CIP-GEN	0.49
12-3a-E1-16	12	12	random	CIP-GEN	0.383
12-3a-E1-17	12	12	random	CIP-GEN	0.457
12-3a-E1-18	12	12	random	CIP-GEN	0.401
12-3a-E1-19	12	12	random	CIP-GEN	0.379
12-3a-E1-2	12	12	random	CIP-GEN	0.27
12-3a-E1-20	12	12	random	CIP-GEN	0.095
12-3a-E1-3	12	12	random	CIP-GEN	0.164
12-3a-E1-4	12	12	random	CIP-GEN	0.3
12-3a-E1-5	12	12	random	CIP-GEN	0.319
12-3a-E1-6	12	12	random	CIP-GEN	0.223
12-3a-E1-7	12	12	random	CIP-GEN	0.249
12-3a-E1-8	12	12	random	CIP-GEN	0.122
12-3a-E1-9	12	12	random	CIP-GEN	0.211
12-3a-E7-1	3	12	mono	CIP-GEN	0.081
12-3a-E7-10	3	12	mono	CIP-GEN	-0.025
12-3a-E7-11	3	12	mono	CIP-GEN	0.071
12-3a-E7-12	3	12	mono	CIP-GEN	0.151
12-3a-E7-13	3	12	mono	CIP-GEN	0.151
12-3a-E7-14	3	12	mono	CIP-GEN	0.163
12-3a-E7-15	3	12	mono	CIP-GEN	0.17
12-3a-E7-16	3	12	mono	CIP-GEN	0.04
12-3a-E7-17	3	12	mono	CIP-GEN	0.058
12-3a-E7-18	3	12	mono	CIP-GEN	0.031
12-3a-E7-19	3	12	mono	CIP-GEN	-0.044
12-3a-E7-2	3	12	mono	CIP-GEN	0.027
12-3a-E7-20	3	12	mono	CIP-GEN	0.093
12-3a-E7-3	3	12	mono	CIP-GEN	-0.058
12-3a-E7-4	3	12	mono	CIP-GEN	-0.042
12-3a-E7-5	3	12	mono	CIP-GEN	0.265
12-3a-E7-6	3	12	mono	CIP-GEN	-0.044
12-3a-E7-7	3	12	mono	CIP-GEN	0.041
12-3a-E7-8	3	12	mono	CIP-GEN	0.111
12-3a-E7-9	3	12	mono	CIP-GEN	0.013
12-3a-F1-1	7	12	fast-regular	CIP-GEN	0.23
12-3a-F1-10	7	12	fast-regular	CIP-GEN	0.175
12-3a-F1-11	7	12	fast-regular	CIP-GEN	0.466
12-3a-F1-12	7	12	fast-regular	CIP-GEN	0.331
12-3a-F1-13	7	12	fast-regular	CIP-GEN	0.186
12-3a-F1-14	7	12	fast-regular	CIP-GEN	0.326
12-3a-F1-15	7	12	fast-regular	CIP-GEN	0.399
12-3a-F1-16	7	12	fast-regular	CIP-GEN	0.069
12-3a-F1-17	7	12	fast-regular	CIP-GEN	0.277
12-3a-F1-18	7	12	fast-regular	CIP-GEN	0.028
12-3a-F1-19	7	12	fast-regular	CIP-GEN	0.125
12-3a-F1-2	7	12	fast-regular	CIP-GEN	0.28
12-3a-F1-20	7	12	fast-regular	CIP-GEN	0.066
12-3a-F1-3	7	12	fast-regular	CIP-GEN	0.296
12-3a-F1-4	7	12	fast-regular	CIP-GEN	0.263
12-3a-F1-5	7	12	fast-regular	CIP-GEN	0.292
12-3a-F1-6	7	12	fast-regular	CIP-GEN	0.087
12-3a-F1-7	7	12	fast-regular	CIP-GEN	0.297
12-3a-F1-8	7	12	fast-regular	CIP-GEN	0.161
12-3a-F1-9	7	12	fast-regular	CIP-GEN	0.036
12-3a-F7-1	4	12	nodrug	CIP-GEN	0.008
12-3a-F7-10	4	12	nodrug	CIP-GEN	-0.019
12-3a-F7-11	4	12	nodrug	CIP-GEN	-0.1
12-3a-F7-12	4	12	nodrug	CIP-GEN	0.016
12-3a-F7-13	4	12	nodrug	CIP-GEN	-0.101
12-3a-F7-14	4	12	nodrug	CIP-GEN	0.174
12-3a-F7-15	4	12	nodrug	CIP-GEN	0.102
12-3a-F7-16	4	12	nodrug	CIP-GEN	-0.125
12-3a-F7-17	4	12	nodrug	CIP-GEN	0.071
12-3a-F7-18	4	12	nodrug	CIP-GEN	-0.018
12-3a-F7-19	4	12	nodrug	CIP-GEN	-0.005
12-3a-F7-2	4	12	nodrug	CIP-GEN	0.088
12-3a-F7-20	4	12	nodrug	CIP-GEN	-0.053
12-3a-F7-3	4	12	nodrug	CIP-GEN	-0.013
12-3a-F7-4	4	12	nodrug	CIP-GEN	0.302
12-3a-F7-5	4	12	nodrug	CIP-GEN	0.173
12-3a-F7-6	4	12	nodrug	CIP-GEN	-0.056
12-3a-F7-7	4	12	nodrug	CIP-GEN	0.054
12-3a-F7-8	4	12	nodrug	CIP-GEN	0.042
12-3a-F7-9	4	12	nodrug	CIP-GEN	0.014
12-3a-G1-1	13	12	random	CIP-GEN	0.229
12-3a-G1-10	13	12	random	CIP-GEN	0.052
12-3a-G1-11	13	12	random	CIP-GEN	0.367
12-3a-G1-12	13	12	random	CIP-GEN	0.285
12-3a-G1-13	13	12	random	CIP-GEN	0.272
12-3a-G1-14	13	12	random	CIP-GEN	0.343
12-3a-G1-15	13	12	random	CIP-GEN	0.271
12-3a-G1-16	13	12	random	CIP-GEN	0.18
12-3a-G1-17	13	12	random	CIP-GEN	0.326
12-3a-G1-18	13	12	random	CIP-GEN	0.366
12-3a-G1-19	13	12	random	CIP-GEN	0.218
12-3a-G1-2	13	12	random	CIP-GEN	0.204
12-3a-G1-20	13	12	random	CIP-GEN	0.105
12-3a-G1-3	13	12	random	CIP-GEN	0.366
12-3a-G1-4	13	12	random	CIP-GEN	0.216
12-3a-G1-5	13	12	random	CIP-GEN	0.236
12-3a-G1-6	13	12	random	CIP-GEN	0.182
12-3a-G1-7	13	12	random	CIP-GEN	0.133
12-3a-G1-8	13	12	random	CIP-GEN	0.155
12-3a-G1-9	13	12	random	CIP-GEN	0.148
12-3a-G7-1	1	12	mono	CIP-GEN	-0.106
12-3a-G7-10	1	12	mono	CIP-GEN	-0.205
12-3a-G7-11	1	12	mono	CIP-GEN	-0.09
12-3a-G7-12	1	12	mono	CIP-GEN	-0.142
12-3a-G7-13	1	12	mono	CIP-GEN	-0.131
12-3a-G7-14	1	12	mono	CIP-GEN	-0.035
12-3a-G7-15	1	12	mono	CIP-GEN	0.061
12-3a-G7-16	1	12	mono	CIP-GEN	-0.188
12-3a-G7-17	1	12	mono	CIP-GEN	-0.045
12-3a-G7-18	1	12	mono	CIP-GEN	-0.156
12-3a-G7-19	1	12	mono	CIP-GEN	-0.182
12-3a-G7-2	1	12	mono	CIP-GEN	-0.313
12-3a-G7-20	1	12	mono	CIP-GEN	-0.219
12-3a-G7-3	1	12	mono	CIP-GEN	-0.267
12-3a-G7-4	1	12	mono	CIP-GEN	-0.031
12-3a-G7-5	1	12	mono	CIP-GEN	-0.095
12-3a-G7-6	1	12	mono	CIP-GEN	-0.233
12-3a-G7-7	1	12	mono	CIP-GEN	-0.209
12-3a-G7-8	1	12	mono	CIP-GEN	-0.175
12-3a-G7-9	1	12	mono	CIP-GEN	-0.196
12-3a-H3-1	15	12	random	CIP-GEN	-0.578
12-3a-H3-10	15	12	random	CIP-GEN	-0.577
12-3a-H3-11	15	12	random	CIP-GEN	-0.639
12-3a-H3-12	15	12	random	CIP-GEN	-0.596
12-3a-H3-13	15	12	random	CIP-GEN	-0.619
12-3a-H3-14	15	12	random	CIP-GEN	-0.602
12-3a-H3-15	15	12	random	CIP-GEN	-0.573
12-3a-H3-16	15	12	random	CIP-GEN	-0.59
12-3a-H3-17	15	12	random	CIP-GEN	-0.618
12-3a-H3-18	15	12	random	CIP-GEN	-0.548
12-3a-H3-19	15	12	random	CIP-GEN	-0.376
12-3a-H3-2	15	12	random	CIP-GEN	-0.385
12-3a-H3-20	15	12	random	CIP-GEN	-0.633
12-3a-H3-3	15	12	random	CIP-GEN	-0.541
12-3a-H3-4	15	12	random	CIP-GEN	-0.539
12-3a-H3-5	15	12	random	CIP-GEN	-0.385
12-3a-H3-6	15	12	random	CIP-GEN	-0.61
12-3a-H3-7	15	12	random	CIP-GEN	-0.584
12-3a-H3-8	15	12	random	CIP-GEN	-0.528
12-3a-H3-9	15	12	random	CIP-GEN	-0.565
12-3a-H7-1	16	12	random	CIP-GEN	0.14
12-3a-H7-10	16	12	random	CIP-GEN	-0.056
12-3a-H7-11	16	12	random	CIP-GEN	-0.102
12-3a-H7-12	16	12	random	CIP-GEN	-0.041
12-3a-H7-13	16	12	random	CIP-GEN	-0.004
12-3a-H7-14	16	12	random	CIP-GEN	-0.153
12-3a-H7-15	16	12	random	CIP-GEN	-0.049
12-3a-H7-16	16	12	random	CIP-GEN	0.007
12-3a-H7-17	16	12	random	CIP-GEN	-0.144
12-3a-H7-18	16	12	random	CIP-GEN	-0.18
12-3a-H7-19	16	12	random	CIP-GEN	0.13
12-3a-H7-2	16	12	random	CIP-GEN	-0.102
12-3a-H7-20	16	12	random	CIP-GEN	-0.131
12-3a-H7-3	16	12	random	CIP-GEN	0.023
12-3a-H7-4	16	12	random	CIP-GEN	-0.138
12-3a-H7-5	16	12	random	CIP-GEN	-0.071
12-3a-H7-6	16	12	random	CIP-GEN	-0.13
12-3a-H7-7	16	12	random	CIP-GEN	-0.144
12-3a-H7-8	16	12	random	CIP-GEN	-0.132
12-3a-H7-9	16	12	random	CIP-GEN	-0.089
48-3a-A1-1	9	48	slow-regular	CIP-GEN	-0.109
48-3a-A1-10	9	48	slow-regular	CIP-GEN	-0.223
48-3a-A1-11	9	48	slow-regular	CIP-GEN	-0.414
48-3a-A1-12	9	48	slow-regular	CIP-GEN	0.247
48-3a-A1-13	9	48	slow-regular	CIP-GEN	-0.131
48-3a-A1-14	9	48	slow-regular	CIP-GEN	0.221
48-3a-A1-15	9	48	slow-regular	CIP-GEN	0.007
48-3a-A1-16	9	48	slow-regular	CIP-GEN	0.072
48-3a-A1-17	9	48	slow-regular	CIP-GEN	0.214
48-3a-A1-18	9	48	slow-regular	CIP-GEN	-0.027
48-3a-A1-19	9	48	slow-regular	CIP-GEN	-0.007
48-3a-A1-2	9	48	slow-regular	CIP-GEN	-0.139
48-3a-A1-20	9	48	slow-regular	CIP-GEN	0.152
48-3a-A1-3	9	48	slow-regular	CIP-GEN	-0.28
48-3a-A1-4	9	48	slow-regular	CIP-GEN	0.104
48-3a-A1-5	9	48	slow-regular	CIP-GEN	-0.044
48-3a-A1-6	9	48	slow-regular	CIP-GEN	-0.004
48-3a-A1-7	9	48	slow-regular	CIP-GEN	-0.223
48-3a-A1-8	9	48	slow-regular	CIP-GEN	0.18
48-3a-A1-9	9	48	slow-regular	CIP-GEN	-0.326
48-3a-A7-1	10	48	slow-regular	CIP-GEN	-0.118
48-3a-A7-10	10	48	slow-regular	CIP-GEN	-0.062
48-3a-A7-11	10	48	slow-regular	CIP-GEN	-0.161
48-3a-A7-12	10	48	slow-regular	CIP-GEN	-0.228
48-3a-A7-13	10	48	slow-regular	CIP-GEN	-0.255
48-3a-A7-14	10	48	slow-regular	CIP-GEN	-0.198
48-3a-A7-16	10	48	slow-regular	CIP-GEN	-0.103
48-3a-A7-17	10	48	slow-regular	CIP-GEN	-0.336
48-3a-A7-18	10	48	slow-regular	CIP-GEN	-0.064
48-3a-A7-19	10	48	slow-regular	CIP-GEN	-0.199
48-3a-A7-2	10	48	slow-regular	CIP-GEN	0.008
48-3a-A7-20	10	48	slow-regular	CIP-GEN	-0.184
48-3a-A7-3	10	48	slow-regular	CIP-GEN	-0.092
48-3a-A7-4	10	48	slow-regular	CIP-GEN	-0.053
48-3a-A7-5	10	48	slow-regular	CIP-GEN	-0.02
48-3a-A7-6	10	48	slow-regular	CIP-GEN	-0.139
48-3a-A7-7	10	48	slow-regular	CIP-GEN	-0.084
48-3a-A7-8	10	48	slow-regular	CIP-GEN	-0.091
48-3a-A7-9	10	48	slow-regular	CIP-GEN	-0.147
48-3a-B1-1	2	48	mono	CIP-GEN	-0.054
48-3a-B1-10	2	48	mono	CIP-GEN	-0.113
48-3a-B1-11	2	48	mono	CIP-GEN	-0.019
48-3a-B1-12	2	48	mono	CIP-GEN	-0.119
48-3a-B1-13	2	48	mono	CIP-GEN	-0.074
48-3a-B1-14	2	48	mono	CIP-GEN	-0.165
48-3a-B1-15	2	48	mono	CIP-GEN	-0.108
48-3a-B1-16	2	48	mono	CIP-GEN	-0.184
48-3a-B1-17	2	48	mono	CIP-GEN	0.101
48-3a-B1-18	2	48	mono	CIP-GEN	0.001
48-3a-B1-19	2	48	mono	CIP-GEN	-0.144
48-3a-B1-2	2	48	mono	CIP-GEN	0
48-3a-B1-20	2	48	mono	CIP-GEN	-0.121
48-3a-B1-3	2	48	mono	CIP-GEN	-0.015
48-3a-B1-4	2	48	mono	CIP-GEN	-0.129
48-3a-B1-5	2	48	mono	CIP-GEN	-0.037
48-3a-B1-6	2	48	mono	CIP-GEN	0.056
48-3a-B1-7	2	48	mono	CIP-GEN	0.081
48-3a-B1-8	2	48	mono	CIP-GEN	0.001
48-3a-B1-9	2	48	mono	CIP-GEN	-0.073
48-3a-B7star-1	8	48	slow-regular	CIP-GEN	-0.182
48-3a-B7star-10	8	48	slow-regular	CIP-GEN	-0.13
48-3a-B7star-11	8	48	slow-regular	CIP-GEN	-0.21
48-3a-B7star-12	8	48	slow-regular	CIP-GEN	-0.23
48-3a-B7star-13	8	48	slow-regular	CIP-GEN	-0.218
48-3a-B7star-14	8	48	slow-regular	CIP-GEN	-0.335
48-3a-B7star-15	8	48	slow-regular	CIP-GEN	-0.924
48-3a-B7star-16	8	48	slow-regular	CIP-GEN	-0.298
48-3a-B7star-17	8	48	slow-regular	CIP-GEN	-0.157
48-3a-B7star-18	8	48	slow-regular	CIP-GEN	-0.293
48-3a-B7star-19	8	48	slow-regular	CIP-GEN	-0.263
48-3a-B7star-2	8	48	slow-regular	CIP-GEN	-0.236
48-3a-B7star-20	8	48	slow-regular	CIP-GEN	-0.259
48-3a-B7star-3	8	48	slow-regular	CIP-GEN	-0.217
48-3a-B7star-4	8	48	slow-regular	CIP-GEN	-0.835
48-3a-B7star-5	8	48	slow-regular	CIP-GEN	-0.233
48-3a-B7star-6	8	48	slow-regular	CIP-GEN	-0.201
48-3a-B7star-7	8	48	slow-regular	CIP-GEN	-0.259
48-3a-B7star-8	8	48	slow-regular	CIP-GEN	-0.323
48-3a-B7star-9	8	48	slow-regular	CIP-GEN	-0.3
48-3a-C1-1	6	48	fast-regular	CIP-GEN	0.387
48-3a-C1-10	6	48	fast-regular	CIP-GEN	0.322
48-3a-C1-11	6	48	fast-regular	CIP-GEN	0.272
48-3a-C1-12	6	48	fast-regular	CIP-GEN	0.206
48-3a-C1-13	6	48	fast-regular	CIP-GEN	0.215
48-3a-C1-14	6	48	fast-regular	CIP-GEN	0.231
48-3a-C1-15	6	48	fast-regular	CIP-GEN	0.447
48-3a-C1-16	6	48	fast-regular	CIP-GEN	0.216
48-3a-C1-17	6	48	fast-regular	CIP-GEN	0.252
48-3a-C1-18	6	48	fast-regular	CIP-GEN	0.594
48-3a-C1-19	6	48	fast-regular	CIP-GEN	0.254
48-3a-C1-2	6	48	fast-regular	CIP-GEN	0.436
48-3a-C1-20	6	48	fast-regular	CIP-GEN	0.174
48-3a-C1-3	6	48	fast-regular	CIP-GEN	0.254
48-3a-C1-4	6	48	fast-regular	CIP-GEN	0.411
48-3a-C1-5	6	48	fast-regular	CIP-GEN	0.444
48-3a-C1-6	6	48	fast-regular	CIP-GEN	0.32
48-3a-C1-7	6	48	fast-regular	CIP-GEN	0.489
48-3a-C1-8	6	48	fast-regular	CIP-GEN	0.249
48-3a-C1-9	6	48	fast-regular	CIP-GEN	0.377
48-3a-C7-1	11	48	random	CIP-GEN	-0.108
48-3a-C7-10	11	48	random	CIP-GEN	-0.127
48-3a-C7-11	11	48	random	CIP-GEN	-0.115
48-3a-C7-12	11	48	random	CIP-GEN	-0.085
48-3a-C7-13	11	48	random	CIP-GEN	-0.099
48-3a-C7-14	11	48	random	CIP-GEN	-0.068
48-3a-C7-15	11	48	random	CIP-GEN	-0.584
48-3a-C7-16	11	48	random	CIP-GEN	-0.118
48-3a-C7-17	11	48	random	CIP-GEN	-0.124
48-3a-C7-18	11	48	random	CIP-GEN	-0.088
48-3a-C7-19	11	48	random	CIP-GEN	-0.221
48-3a-C7-2	11	48	random	CIP-GEN	-0.69
48-3a-C7-20	11	48	random	CIP-GEN	-0.204
48-3a-C7-3	11	48	random	CIP-GEN	-0.246
48-3a-C7-4	11	48	random	CIP-GEN	-0.11
48-3a-C7-5	11	48	random	CIP-GEN	-0.025
48-3a-C7-6	11	48	random	CIP-GEN	-0.189
48-3a-C7-7	11	48	random	CIP-GEN	-0.165
48-3a-C7-8	11	48	random	CIP-GEN	-0.17
48-3a-C7-9	11	48	random	CIP-GEN	-0.205
48-3a-D1-1	14	48	random	CIP-GEN	0.467
48-3a-D1-10	14	48	random	CIP-GEN	0.091
48-3a-D1-11	14	48	random	CIP-GEN	0.035
48-3a-D1-12	14	48	random	CIP-GEN	-0.068
48-3a-D1-13	14	48	random	CIP-GEN	0.071
48-3a-D1-14	14	48	random	CIP-GEN	0.125
48-3a-D1-15	14	48	random	CIP-GEN	0.271
48-3a-D1-16	14	48	random	CIP-GEN	-0.008
48-3a-D1-17	14	48	random	CIP-GEN	0.109
48-3a-D1-18	14	48	random	CIP-GEN	0.226
48-3a-D1-19	14	48	random	CIP-GEN	0.224
48-3a-D1-2	14	48	random	CIP-GEN	-0.019
48-3a-D1-20	14	48	random	CIP-GEN	-0.554
48-3a-D1-3	14	48	random	CIP-GEN	-0.616
48-3a-D1-4	14	48	random	CIP-GEN	0.328
48-3a-D1-5	14	48	random	CIP-GEN	0.376
48-3a-D1-6	14	48	random	CIP-GEN	0.042
48-3a-D1-7	14	48	random	CIP-GEN	-0.429
48-3a-D1-8	14	48	random	CIP-GEN	0.19
48-3a-D1-9	14	48	random	CIP-GEN	-0.178
48-3a-D7-1	5	48	fast-regular	CIP-GEN	-0.175
48-3a-D7-10	5	48	fast-regular	CIP-GEN	-0.309
48-3a-D7-11	5	48	fast-regular	CIP-GEN	-0.178
48-3a-D7-12	5	48	fast-regular	CIP-GEN	-0.191
48-3a-D7-13	5	48	fast-regular	CIP-GEN	-0.276
48-3a-D7-14	5	48	fast-regular	CIP-GEN	-0.226
48-3a-D7-15	5	48	fast-regular	CIP-GEN	-0.113
48-3a-D7-16	5	48	fast-regular	CIP-GEN	-0.167
48-3a-D7-17	5	48	fast-regular	CIP-GEN	-0.213
48-3a-D7-18	5	48	fast-regular	CIP-GEN	-0.116
48-3a-D7-19	5	48	fast-regular	CIP-GEN	-0.194
48-3a-D7-2	5	48	fast-regular	CIP-GEN	-0.345
48-3a-D7-20	5	48	fast-regular	CIP-GEN	-0.167
48-3a-D7-3	5	48	fast-regular	CIP-GEN	-0.329
48-3a-D7-4	5	48	fast-regular	CIP-GEN	-0.233
48-3a-D7-5	5	48	fast-regular	CIP-GEN	-0.279
48-3a-D7-6	5	48	fast-regular	CIP-GEN	-0.313
48-3a-D7-7	5	48	fast-regular	CIP-GEN	0.098
48-3a-D7-8	5	48	fast-regular	CIP-GEN	-0.339
48-3a-D7-9	5	48	fast-regular	CIP-GEN	-0.243
48-3a-E1-1	12	48	random	CIP-GEN	0.506
48-3a-E1-10	12	48	random	CIP-GEN	0.368
48-3a-E1-11	12	48	random	CIP-GEN	0.443
48-3a-E1-12	12	48	random	CIP-GEN	0.396
48-3a-E1-13	12	48	random	CIP-GEN	0.508
48-3a-E1-14	12	48	random	CIP-GEN	1.133
48-3a-E1-15	12	48	random	CIP-GEN	0.544
48-3a-E1-16	12	48	random	CIP-GEN	0.414
48-3a-E1-17	12	48	random	CIP-GEN	0.342
48-3a-E1-18	12	48	random	CIP-GEN	0.246
48-3a-E1-19	12	48	random	CIP-GEN	0.274
48-3a-E1-2	12	48	random	CIP-GEN	0.453
48-3a-E1-20	12	48	random	CIP-GEN	0.415
48-3a-E1-3	12	48	random	CIP-GEN	0.694
48-3a-E1-4	12	48	random	CIP-GEN	0.645
48-3a-E1-5	12	48	random	CIP-GEN	0.677
48-3a-E1-6	12	48	random	CIP-GEN	0.599
48-3a-E1-7	12	48	random	CIP-GEN	0.575
48-3a-E1-8	12	48	random	CIP-GEN	0.687
48-3a-E1-9	12	48	random	CIP-GEN	0.417
48-3a-E7star-1	3	48	mono	CIP-GEN	-0.385
48-3a-E7star-10	3	48	mono	CIP-GEN	-0.199
48-3a-E7star-11	3	48	mono	CIP-GEN	0.089
48-3a-E7star-12	3	48	mono	CIP-GEN	-0.281
48-3a-E7star-13	3	48	mono	CIP-GEN	-0.024
48-3a-E7star-14	3	48	mono	CIP-GEN	0.104
48-3a-E7star-15	3	48	mono	CIP-GEN	0.083
48-3a-E7star-16	3	48	mono	CIP-GEN	-0.028
48-3a-E7star-17	3	48	mono	CIP-GEN	0.041
48-3a-E7star-18	3	48	mono	CIP-GEN	0.007
48-3a-E7star-19	3	48	mono	CIP-GEN	-0.025
48-3a-E7star-2	3	48	mono	CIP-GEN	-0.241
48-3a-E7star-20	3	48	mono	CIP-GEN	0.017
48-3a-E7star-3	3	48	mono	CIP-GEN	-0.374
48-3a-E7star-4	3	48	mono	CIP-GEN	0.013
48-3a-E7star-5	3	48	mono	CIP-GEN	-0.063
48-3a-E7star-6	3	48	mono	CIP-GEN	-0.377
48-3a-E7star-7	3	48	mono	CIP-GEN	-0.101
48-3a-E7star-8	3	48	mono	CIP-GEN	-0.138
48-3a-E7star-9	3	48	mono	CIP-GEN	-0.131
48-3a-F1-1	7	48	fast-regular	CIP-GEN	0.267
48-3a-F1-10	7	48	fast-regular	CIP-GEN	0.097
48-3a-F1-11	7	48	fast-regular	CIP-GEN	0.171
48-3a-F1-12	7	48	fast-regular	CIP-GEN	0.061
48-3a-F1-13	7	48	fast-regular	CIP-GEN	0.027
48-3a-F1-14	7	48	fast-regular	CIP-GEN	0.152
48-3a-F1-15	7	48	fast-regular	CIP-GEN	0.286
48-3a-F1-16	7	48	fast-regular	CIP-GEN	0.052
48-3a-F1-17	7	48	fast-regular	CIP-GEN	0.233
48-3a-F1-18	7	48	fast-regular	CIP-GEN	-0.001
48-3a-F1-19	7	48	fast-regular	CIP-GEN	0.135
48-3a-F1-2	7	48	fast-regular	CIP-GEN	0.123
48-3a-F1-20	7	48	fast-regular	CIP-GEN	-0.028
48-3a-F1-3	7	48	fast-regular	CIP-GEN	0.214
48-3a-F1-4	7	48	fast-regular	CIP-GEN	0.197
48-3a-F1-5	7	48	fast-regular	CIP-GEN	0.318
48-3a-F1-6	7	48	fast-regular	CIP-GEN	0.115
48-3a-F1-7	7	48	fast-regular	CIP-GEN	0.208
48-3a-F1-8	7	48	fast-regular	CIP-GEN	0.283
48-3a-F1-9	7	48	fast-regular	CIP-GEN	0.132
48-3a-F7-1	4	48	nodrug	CIP-GEN	0.028
48-3a-F7-10	4	48	nodrug	CIP-GEN	0.112
48-3a-F7-11	4	48	nodrug	CIP-GEN	-0.117
48-3a-F7-12	4	48	nodrug	CIP-GEN	-0.052
48-3a-F7-13	4	48	nodrug	CIP-GEN	-0.097
48-3a-F7-14	4	48	nodrug	CIP-GEN	-0.02
48-3a-F7-15	4	48	nodrug	CIP-GEN	-0.099
48-3a-F7-16	4	48	nodrug	CIP-GEN	-0.083
48-3a-F7-17	4	48	nodrug	CIP-GEN	-0.013
48-3a-F7-18	4	48	nodrug	CIP-GEN	-0.093
48-3a-F7-19	4	48	nodrug	CIP-GEN	-0.104
48-3a-F7-2	4	48	nodrug	CIP-GEN	0.142
48-3a-F7-20	4	48	nodrug	CIP-GEN	-0.017
48-3a-F7-3	4	48	nodrug	CIP-GEN	0.022
48-3a-F7-4	4	48	nodrug	CIP-GEN	0.039
48-3a-F7-5	4	48	nodrug	CIP-GEN	0.033
48-3a-F7-6	4	48	nodrug	CIP-GEN	0.03
48-3a-F7-7	4	48	nodrug	CIP-GEN	0.096
48-3a-F7-8	4	48	nodrug	CIP-GEN	-0.027
48-3a-F7-9	4	48	nodrug	CIP-GEN	-0.025
48-3a-G1-1	13	48	random	CIP-GEN	0.185
48-3a-G1-10	13	48	random	CIP-GEN	-0.124
48-3a-G1-11	13	48	random	CIP-GEN	0.098
48-3a-G1-12	13	48	random	CIP-GEN	-0.02
48-3a-G1-13	13	48	random	CIP-GEN	0.004
48-3a-G1-14	13	48	random	CIP-GEN	0.033
48-3a-G1-15	13	48	random	CIP-GEN	0.106
48-3a-G1-16	13	48	random	CIP-GEN	0.121
48-3a-G1-17	13	48	random	CIP-GEN	-0.159
48-3a-G1-18	13	48	random	CIP-GEN	0.046
48-3a-G1-19	13	48	random	CIP-GEN	-0.021
48-3a-G1-2	13	48	random	CIP-GEN	-0.071
48-3a-G1-20	13	48	random	CIP-GEN	0.242
48-3a-G1-3	13	48	random	CIP-GEN	-0.099
48-3a-G1-4	13	48	random	CIP-GEN	-0.011
48-3a-G1-5	13	48	random	CIP-GEN	-0.007
48-3a-G1-6	13	48	random	CIP-GEN	-0.145
48-3a-G1-7	13	48	random	CIP-GEN	-0.121
48-3a-G1-8	13	48	random	CIP-GEN	-0.053
48-3a-G1-9	13	48	random	CIP-GEN	-0.143
48-3a-G7-1	1	48	mono	CIP-GEN	-0.147
48-3a-G7-10	1	48	mono	CIP-GEN	-0.044
48-3a-G7-11	1	48	mono	CIP-GEN	-0.105
48-3a-G7-12	1	48	mono	CIP-GEN	0.284
48-3a-G7-13	1	48	mono	CIP-GEN	-0.174
48-3a-G7-14	1	48	mono	CIP-GEN	0.34
48-3a-G7-15	1	48	mono	CIP-GEN	0.297
48-3a-G7-16	1	48	mono	CIP-GEN	-0.154
48-3a-G7-17	1	48	mono	CIP-GEN	0.34
48-3a-G7-18	1	48	mono	CIP-GEN	-0.046
48-3a-G7-19	1	48	mono	CIP-GEN	0.26
48-3a-G7-2	1	48	mono	CIP-GEN	-0.213
48-3a-G7-20	1	48	mono	CIP-GEN	-0.094
48-3a-G7-3	1	48	mono	CIP-GEN	0.171
48-3a-G7-4	1	48	mono	CIP-GEN	0.144
48-3a-G7-5	1	48	mono	CIP-GEN	-0.188
48-3a-G7-6	1	48	mono	CIP-GEN	0.045
48-3a-G7-7	1	48	mono	CIP-GEN	0.142
48-3a-G7-8	1	48	mono	CIP-GEN	-0.074
48-3a-G7-9	1	48	mono	CIP-GEN	-0.153
48-3a-H3-1	15	48	random	CIP-GEN	-0.517
48-3a-H3-10	15	48	random	CIP-GEN	-0.503
48-3a-H3-11	15	48	random	CIP-GEN	-0.515
48-3a-H3-12	15	48	random	CIP-GEN	-0.515
48-3a-H3-13	15	48	random	CIP-GEN	-0.489
48-3a-H3-14	15	48	random	CIP-GEN	-0.489
48-3a-H3-15	15	48	random	CIP-GEN	-0.54
48-3a-H3-16	15	48	random	CIP-GEN	-0.486
48-3a-H3-17	15	48	random	CIP-GEN	-0.547
48-3a-H3-18	15	48	random	CIP-GEN	-0.405
48-3a-H3-19	15	48	random	CIP-GEN	-0.558
48-3a-H3-2	15	48	random	CIP-GEN	-0.54
48-3a-H3-20	15	48	random	CIP-GEN	-0.466
48-3a-H3-3	15	48	random	CIP-GEN	-0.469
48-3a-H3-4	15	48	random	CIP-GEN	-0.442
48-3a-H3-5	15	48	random	CIP-GEN	-0.521
48-3a-H3-6	15	48	random	CIP-GEN	-0.475
48-3a-H3-7	15	48	random	CIP-GEN	-0.531
48-3a-H3-8	15	48	random	CIP-GEN	-0.5
48-3a-H3-9	15	48	random	CIP-GEN	-0.549
48-3a-H7-1	16	48	random	CIP-GEN	0.161
48-3a-H7-10	16	48	random	CIP-GEN	-0.032
48-3a-H7-11	16	48	random	CIP-GEN	0.05
48-3a-H7-12	16	48	random	CIP-GEN	-0.057
48-3a-H7-13	16	48	random	CIP-GEN	-0.033
48-3a-H7-14	16	48	random	CIP-GEN	-0.033
48-3a-H7-15	16	48	random	CIP-GEN	-0.028
48-3a-H7-16	16	48	random	CIP-GEN	0.073
48-3a-H7-17	16	48	random	CIP-GEN	-0.108
48-3a-H7-18	16	48	random	CIP-GEN	0.011
48-3a-H7-19	16	48	random	CIP-GEN	0.083
48-3a-H7-2	16	48	random	CIP-GEN	-0.139
48-3a-H7-20	16	48	random	CIP-GEN	0.038
48-3a-H7-3	16	48	random	CIP-GEN	-0.098
48-3a-H7-4	16	48	random	CIP-GEN	0.053
48-3a-H7-5	16	48	random	CIP-GEN	0.019
48-3a-H7-6	16	48	random	CIP-GEN	-0.094
48-3a-H7-7	16	48	random	CIP-GEN	-0.165
48-3a-H7-8	16	48	random	CIP-GEN	0.046
48-3a-H7-9	16	48	random	CIP-GEN	-0.086
