# Supplementary material for: High potency of sequential therapy with only β-lactam antibiotics
Source: eLife. 2021 Jul 28;10:e68876. doi: 10.7554/eLife.68876 (PMC8456660; doi:10.7554/eLife.68876)
Supplement: Figure 2—source data 1. [file elife-68876-fig2-data1.xlsx]

## Sheet: Fig_2A
transfer	evoexp_ID	set	ab	drug	treatment	mean	sd	ci95
1	1	set3	CAR	A	mono	0.291	0.049	0.039
1	1	set3	CAR	A	random	0.291	0.049	0.039
1	1	set3	CAR	A	fast-regular	0.291	0.049	0.039
1	1	set3	CAR	A	slow-regular	0.291	0.049	0.039
1	2	set3	DOR	B	mono	0.234	0.028	0.023
1	2	set3	DOR	B	random	0.234	0.028	0.023
1	2	set3	DOR	B	fast-regular	0.234	0.028	0.023
1	2	set3	DOR	B	slow-regular	0.234	0.028	0.023
1	3	set3	CEF	C	mono	0.267	0.065	0.052
1	3	set3	CEF	C	random	0.267	0.065	0.052
1	3	set3	CEF	C	fast-regular	0.267	0.065	0.052
1	3	set3	CEF	C	slow-regular	0.267	0.065	0.052
2	5	set3	DOR	B	fast-regular	0.428	0.24	0.192
2	6	set3	CAR	A	fast-regular	0.277	0.029	0.022
2	7	set3	CAR	A	fast-regular	0.288	0.012	0.008
2	11	set3	DOR	B	random	0.458	0.231	0.203
2	12	set3	CAR	A	random	0.281	0.016	0.012
2	13	set3	CAR	A	random	0.273	0.008	0.006
2	1	set3	CAR	A	mono	0.322	0.096	0.056
2	2	set3	DOR	B	mono	0.344	0.089	0.05
2	3	set3	CEF	C	mono	0.329	0.103	0.061
2	8	set3	CAR	A	slow-regular	0.34	0.079	0.047
2	9	set3	DOR	B	slow-regular	0.357	0.113	0.064
2	10	set3	CEF	C	slow-regular	0.318	0.101	0.07
2	14	set3	CAR	A	random	0.333	0.055	0.038
2	15	set3	DOR	B	random	0.43	0.093	0.082
2	16	set3	CEF	C	random	0.335	0.102	0.067
3	5	set3	CEF	C	fast-regular	0.522	0.297	0.238
3	6	set3	CEF	C	fast-regular	0.573	0.397	0.294
3	7	set3	DOR	B	fast-regular	0.552	0.316	0.219
3	12	set3	CEF	C	random	0.669	0.408	0.302
3	14	set3	DOR	B	random	0.548	0.334	0.231
3	15	set3	CAR	A	random	0.336	0.041	0.036
3	16	set3	DOR	B	random	0.908	0.187	0.122
3	11	set3	DOR	B	random	0.599	0.406	0.356
3	13	set3	CAR	A	random	0.386	0.102	0.07
3	1	set3	CAR	A	mono	0.708	0.263	0.155
3	2	set3	DOR	B	mono	0.611	0.249	0.141
3	3	set3	CEF	C	mono	0.802	0.314	0.186
3	8	set3	CAR	A	slow-regular	0.733	0.274	0.162
3	9	set3	DOR	B	slow-regular	0.588	0.28	0.159
3	10	set3	CEF	C	slow-regular	0.881	0.219	0.152
4	13	set3	DOR	B	random	0.7	0.324	0.224
4	14	set3	CEF	C	random	0.764	0.341	0.236
4	16	set3	CAR	A	random	0.671	0.239	0.156
4	5	set3	CAR	A	fast-regular	0.711	0.353	0.283
4	6	set3	DOR	B	fast-regular	0.465	0.22	0.163
4	7	set3	CEF	C	fast-regular	0.81	0.328	0.227
4	12	set3	DOR	B	random	0.523	0.24	0.178
4	15	set3	CAR	A	random	0.351	0.115	0.101
4	11	set3	DOR	B	random	0.619	0.449	0.394
4	1	set3	CAR	A	mono	0.795	0.157	0.093
4	2	set3	DOR	B	mono	0.75	0.226	0.128
4	3	set3	CEF	C	mono	0.857	0.192	0.113
4	8	set3	CAR	A	slow-regular	0.813	0.154	0.091
4	9	set3	DOR	B	slow-regular	0.846	0.204	0.116
4	10	set3	CEF	C	slow-regular	0.958	0.103	0.071
5	8	set3	DOR	B	slow-regular	0.603	0.223	0.126
5	9	set3	CAR	A	slow-regular	0.726	0.18	0.102
5	10	set3	CAR	A	slow-regular	0.756	0.135	0.094
5	5	set3	DOR	B	fast-regular	0.696	0.342	0.274
5	6	set3	CAR	A	fast-regular	0.627	0.385	0.308
5	7	set3	CAR	A	fast-regular	0.677	0.265	0.183
5	11	set3	CAR	A	random	0.733	0.309	0.271
5	12	set3	CEF	C	random	0.676	0.338	0.25
5	13	set3	DOR	B	random	0.965	0.132	0.091
5	14	set3	CEF	C	random	0.819	0.27	0.187
5	15	set3	DOR	B	random	0.865	0.184	0.161
5	16	set3	CEF	C	random	0.815	0.226	0.147
5	1	set3	CAR	A	mono	0.75	0.164	0.097
5	2	set3	DOR	B	mono	0.836	0.15	0.085
5	3	set3	CEF	C	mono	0.872	0.074	0.044
6	11	set3	CEF	C	random	0.83	0.335	0.294
6	15	set3	CEF	C	random	1.026	0.112	0.098
6	5	set3	CEF	C	fast-regular	0.88	0.18	0.144
6	6	set3	CEF	C	fast-regular	0.691	0.362	0.289
6	7	set3	DOR	B	fast-regular	0.667	0.284	0.197
6	8	set3	DOR	B	slow-regular	0.687	0.268	0.152
6	9	set3	CAR	A	slow-regular	0.335	0.03	0.017
6	10	set3	CAR	A	slow-regular	0.563	0.281	0.195
6	16	set3	CAR	A	random	0.816	0.273	0.179
6	12	set3	DOR	B	random	0.671	0.177	0.131
6	13	set3	CAR	A	random	0.77	0.162	0.112
6	14	set3	CAR	A	random	0.934	0.111	0.077
6	1	set3	CAR	A	mono	0.832	0.147	0.087
6	2	set3	DOR	B	mono	0.915	0.099	0.056
6	3	set3	CEF	C	mono	0.894	0.065	0.039
7	14	set3	DOR	B	random	0.766	0.17	0.118
7	15	set3	CEF	C	random	0.954	0.119	0.104
7	5	set3	CAR	A	fast-regular	0.914	0.105	0.084
7	6	set3	DOR	B	fast-regular	0.509	0.211	0.157
7	7	set3	CEF	C	fast-regular	0.773	0.286	0.198
7	8	set3	DOR	B	slow-regular	0.877	0.208	0.118
7	9	set3	CAR	A	slow-regular	0.609	0.238	0.141
7	10	set3	CAR	A	slow-regular	0.724	0.115	0.08
7	11	set3	CAR	A	random	0.756	0.307	0.269
7	13	set3	DOR	B	random	0.81	0.137	0.095
7	16	set3	CAR	A	random	0.583	0.27	0.176
7	12	set3	DOR	B	random	0.633	0.186	0.137
7	1	set3	CAR	A	mono	0.772	0.124	0.073
7	2	set3	DOR	B	mono	0.846	0.121	0.068
7	3	set3	CEF	C	mono	0.842	0.089	0.053
8	12	set3	CAR	A	random	0.75	0.31	0.23
8	16	set3	DOR	B	random	0.864	0.212	0.138
8	5	set3	DOR	B	fast-regular	0.849	0.132	0.105
8	6	set3	CAR	A	fast-regular	0.612	0.321	0.238
8	7	set3	CAR	A	fast-regular	0.678	0.246	0.17
8	8	set3	DOR	B	slow-regular	0.92	0.214	0.121
8	9	set3	CAR	A	slow-regular	0.847	0.196	0.116
8	10	set3	CAR	A	slow-regular	0.761	0.152	0.105
8	11	set3	DOR	B	random	0.771	0.295	0.258
8	13	set3	DOR	B	random	0.979	0.043	0.03
8	14	set3	CAR	A	random	0.875	0.107	0.074
8	15	set3	DOR	B	random	1.035	0.099	0.087
8	1	set3	CAR	A	mono	0.746	0.171	0.101
8	2	set3	DOR	B	mono	0.901	0.089	0.05
8	3	set3	CEF	C	mono	0.908	0.049	0.029
9	8	set3	CEF	C	slow-regular	0.976	0.073	0.043
9	9	set3	CEF	C	slow-regular	0.884	0.172	0.107
9	10	set3	DOR	B	slow-regular	0.639	0.174	0.108
9	5	set3	CEF	C	fast-regular	0.97	0.072	0.058
9	6	set3	CEF	C	fast-regular	0.631	0.333	0.246
9	7	set3	DOR	B	fast-regular	0.69	0.278	0.193
9	12	set3	CEF	C	random	0.691	0.291	0.215
9	13	set3	CAR	A	random	0.822	0.131	0.091
9	16	set3	CEF	C	random	1.015	0.091	0.06
9	11	set3	DOR	B	random	0.815	0.34	0.298
9	14	set3	CAR	A	random	0.894	0.205	0.142
9	15	set3	DOR	B	random	1.051	0.092	0.08
9	1	set3	CAR	A	mono	0.763	0.176	0.104
9	2	set3	DOR	B	mono	0.875	0.163	0.092
9	3	set3	CEF	C	mono	0.895	0.042	0.025
10	8	set3	CEF	C	slow-regular	0.948	0.066	0.039
10	9	set3	CEF	C	slow-regular	0.913	0.104	0.065
10	10	set3	DOR	B	slow-regular	0.903	0.25	0.155
10	5	set3	CAR	A	fast-regular	0.925	0.133	0.107
10	6	set3	DOR	B	fast-regular	0.567	0.203	0.151
10	7	set3	CEF	C	fast-regular	0.863	0.253	0.175
10	16	set3	CAR	A	random	0.78	0.149	0.097
10	12	set3	DOR	B	random	0.615	0.203	0.15
10	13	set3	DOR	B	random	0.909	0.121	0.084
10	11	set3	DOR	B	random	0.823	0.356	0.312
10	14	set3	CAR	A	random	0.944	0.234	0.162
10	15	set3	DOR	B	random	1.013	0.111	0.097
10	1	set3	CAR	A	mono	0.937	0.381	0.225
10	2	set3	DOR	B	mono	0.852	0.112	0.063
10	3	set3	CEF	C	mono	0.901	0.041	0.025
11	13	set3	CEF	C	random	0.926	0.063	0.043
11	8	set3	CEF	C	slow-regular	0.948	0.055	0.033
11	9	set3	CEF	C	slow-regular	0.982	0.103	0.064
11	10	set3	DOR	B	slow-regular	0.977	0.154	0.095
11	12	set3	CAR	A	random	0.68	0.254	0.188
11	14	set3	DOR	B	random	0.749	0.227	0.157
11	15	set3	CEF	C	random	0.97	0.138	0.121
11	5	set3	DOR	B	fast-regular	0.828	0.124	0.099
11	6	set3	CAR	A	fast-regular	0.654	0.312	0.231
11	7	set3	CAR	A	fast-regular	0.774	0.22	0.152
11	16	set3	CAR	A	random	0.7	0.214	0.14
11	11	set3	DOR	B	random	0.767	0.291	0.255
11	1	set3	CAR	A	mono	0.817	0.181	0.107
11	2	set3	DOR	B	mono	0.855	0.123	0.069
11	3	set3	CEF	C	mono	0.891	0.061	0.036
12	11	set3	CEF	C	random	0.802	0.318	0.279
12	13	set3	CEF	C	random	0.919	0.066	0.046
12	14	set3	CEF	C	random	0.945	0.041	0.029
12	5	set3	CEF	C	fast-regular	0.956	0.036	0.029
12	6	set3	CEF	C	fast-regular	0.653	0.284	0.21
12	7	set3	DOR	B	fast-regular	0.804	0.231	0.16
12	8	set3	CEF	C	slow-regular	0.935	0.058	0.034
12	9	set3	CEF	C	slow-regular	0.943	0.099	0.062
12	10	set3	DOR	B	slow-regular	0.93	0.145	0.09
12	12	set3	DOR	B	random	0.603	0.244	0.181
12	16	set3	CAR	A	random	0.692	0.136	0.089
12	15	set3	DOR	B	random	1.007	0.125	0.11
12	1	set3	CAR	A	mono	0.746	0.17	0.1
12	2	set3	DOR	B	mono	0.855	0.13	0.073
12	3	set3	CEF	C	mono	0.894	0.066	0.039
13	15	set3	CAR	A	random	0.873	0.143	0.125
13	12	set3	CEF	C	random	0.83	0.25	0.185
13	13	set3	CEF	C	random	0.941	0.086	0.06
13	14	set3	DOR	B	random	0.852	0.125	0.087
13	5	set3	CAR	A	fast-regular	0.957	0.134	0.107
13	6	set3	DOR	B	fast-regular	0.652	0.161	0.119
13	7	set3	CEF	C	fast-regular	0.886	0.249	0.173
13	8	set3	CAR	A	slow-regular	0.923	0.084	0.05
13	9	set3	DOR	B	slow-regular	0.953	0.23	0.13
13	10	set3	CEF	C	slow-regular	0.985	0.06	0.041
13	16	set3	CEF	C	random	0.946	0.143	0.093
13	11	set3	DOR	B	random	0.828	0.331	0.291
13	1	set3	CAR	A	mono	0.802	0.216	0.128
13	2	set3	DOR	B	mono	0.894	0.09	0.051
13	3	set3	CEF	C	mono	0.914	0.061	0.036
14	11	set3	CEF	C	random	0.829	0.319	0.28
14	16	set3	DOR	B	random	0.918	0.2	0.13
14	12	set3	CAR	A	random	0.761	0.262	0.194
14	15	set3	CEF	C	random	0.947	0.065	0.057
14	5	set3	DOR	B	fast-regular	0.864	0.105	0.084
14	6	set3	CAR	A	fast-regular	0.763	0.24	0.178
14	7	set3	CAR	A	fast-regular	0.812	0.229	0.158
14	13	set3	CAR	A	random	0.807	0.062	0.043
14	8	set3	CAR	A	slow-regular	0.838	0.123	0.073
14	9	set3	DOR	B	slow-regular	0.912	0.223	0.126
14	10	set3	CEF	C	slow-regular	0.972	0.079	0.055
14	14	set3	CAR	A	random	0.894	0.097	0.067
14	1	set3	CAR	A	mono	0.765	0.115	0.068
14	2	set3	DOR	B	mono	0.882	0.102	0.058
14	3	set3	CEF	C	mono	0.898	0.058	0.034
15	11	set3	CAR	A	random	0.781	0.325	0.284
15	5	set3	CEF	C	fast-regular	0.948	0.055	0.044
15	6	set3	CEF	C	fast-regular	0.76	0.177	0.131
15	7	set3	DOR	B	fast-regular	0.801	0.231	0.16
15	12	set3	CAR	A	random	0.708	0.238	0.176
15	13	set3	CEF	C	random	0.873	0.068	0.047
15	14	set3	DOR	B	random	0.767	0.144	0.1
15	16	set3	CEF	C	random	0.986	0.103	0.068
15	8	set3	CAR	A	slow-regular	0.787	0.162	0.096
15	9	set3	DOR	B	slow-regular	0.921	0.136	0.077
15	10	set3	CEF	C	slow-regular	0.939	0.033	0.023
15	15	set3	DOR	B	random	1.029	0.096	0.084
15	1	set3	CAR	A	mono	0.795	0.108	0.064
15	2	set3	DOR	B	mono	0.895	0.082	0.047
15	3	set3	CEF	C	mono	0.888	0.067	0.04
16	16	set3	DOR	B	random	0.905	0.213	0.139
16	15	set3	CEF	C	random	0.95	0.06	0.053
16	5	set3	CAR	A	fast-regular	0.908	0.106	0.085
16	6	set3	DOR	B	fast-regular	0.656	0.169	0.126
16	7	set3	CEF	C	fast-regular	0.896	0.264	0.183
16	13	set3	DOR	B	random	0.94	0.092	0.064
16	12	set3	DOR	B	random	0.663	0.19	0.141
16	8	set3	CAR	A	slow-regular	0.755	0.211	0.125
16	9	set3	DOR	B	slow-regular	0.913	0.164	0.093
16	10	set3	CEF	C	slow-regular	0.929	0.035	0.024
16	14	set3	CAR	A	random	0.909	0.084	0.058
16	11	set3	DOR	B	random	0.787	0.327	0.287
16	1	set3	CAR	A	mono	0.781	0.115	0.068
16	2	set3	DOR	B	mono	0.899	0.089	0.05
16	3	set3	CEF	C	mono	0.921	0.042	0.025
17	15	set3	CAR	A	random	0.901	0.04	0.035
17	8	set3	DOR	B	slow-regular	0.851	0.213	0.121
17	9	set3	CAR	A	slow-regular	0.952	0.114	0.067
17	10	set3	CAR	A	slow-regular	0.893	0.052	0.036
17	16	set3	DOR	B	random	0.945	0.228	0.149
17	5	set3	DOR	B	fast-regular	0.79	0.171	0.137
17	6	set3	CAR	A	fast-regular	0.861	0.225	0.166
17	7	set3	CAR	A	fast-regular	0.804	0.234	0.162
17	12	set3	CAR	A	random	0.77	0.27	0.2
17	13	set3	CAR	A	random	0.874	0.084	0.058
17	14	set3	CAR	A	random	0.879	0.157	0.109
17	11	set3	DOR	B	random	0.747	0.305	0.268
17	1	set3	CAR	A	mono	0.801	0.097	0.058
17	2	set3	DOR	B	mono	0.846	0.133	0.075
17	3	set3	CEF	C	mono	0.914	0.074	0.044
18	11	set3	CAR	A	random	0.769	0.308	0.27
18	5	set3	CEF	C	fast-regular	0.994	0.079	0.063
18	6	set3	CEF	C	fast-regular	0.811	0.174	0.129
18	7	set3	DOR	B	fast-regular	0.824	0.248	0.172
18	8	set3	DOR	B	slow-regular	0.931	0.191	0.108
18	9	set3	CAR	A	slow-regular	0.888	0.073	0.043
18	10	set3	CAR	A	slow-regular	0.801	0.174	0.12
18	13	set3	CEF	C	random	0.898	0.07	0.048
18	15	set3	CEF	C	random	0.959	0.065	0.057
18	16	set3	DOR	B	random	0.999	0.141	0.092
18	12	set3	DOR	B	random	0.689	0.24	0.178
18	14	set3	CAR	A	random	0.861	0.14	0.097
18	1	set3	CAR	A	mono	0.836	0.092	0.054
18	2	set3	DOR	B	mono	0.885	0.075	0.042
18	3	set3	CEF	C	mono	0.888	0.077	0.046
19	11	set3	CEF	C	random	0.823	0.293	0.257
19	12	set3	CEF	C	random	0.844	0.259	0.192
19	5	set3	CAR	A	fast-regular	0.978	0.126	0.1
19	6	set3	DOR	B	fast-regular	0.691	0.067	0.05
19	7	set3	CEF	C	fast-regular	0.876	0.229	0.159
19	8	set3	DOR	B	slow-regular	0.974	0.188	0.106
19	9	set3	CAR	A	slow-regular	0.899	0.084	0.05
19	10	set3	CAR	A	slow-regular	0.778	0.166	0.115
19	13	set3	DOR	B	random	0.955	0.087	0.06
19	15	set3	CEF	C	random	0.989	0.082	0.072
19	16	set3	CEF	C	random	1.08	0.031	0.02
19	14	set3	CAR	A	random	0.903	0.12	0.083
19	1	set3	CAR	A	mono	0.832	0.094	0.056
19	2	set3	DOR	B	mono	0.937	0.115	0.065
19	3	set3	CEF	C	mono	0.917	0.06	0.035
20	15	set3	CAR	A	random	0.893	0.071	0.062
20	12	set3	CEF	C	random	0.848	0.249	0.185
20	14	set3	DOR	B	random	0.804	0.169	0.117
20	5	set3	DOR	B	fast-regular	0.858	0.214	0.171
20	6	set3	CAR	A	fast-regular	0.883	0.123	0.091
20	7	set3	CAR	A	fast-regular	0.812	0.244	0.169
20	13	set3	CEF	C	random	0.957	0.104	0.072
20	16	set3	CAR	A	random	0.903	0.096	0.063
20	8	set3	DOR	B	slow-regular	0.935	0.16	0.09
20	9	set3	CAR	A	slow-regular	0.864	0.089	0.053
20	10	set3	CAR	A	slow-regular	0.809	0.06	0.041
20	11	set3	DOR	B	random	0.799	0.322	0.282
20	1	set3	CAR	A	mono	0.803	0.102	0.06
20	2	set3	DOR	B	mono	0.896	0.055	0.031
20	3	set3	CEF	C	mono	0.883	0.068	0.04
21	14	set3	CEF	C	random	0.92	0.037	0.026
21	8	set3	CEF	C	slow-regular	0.954	0.071	0.042
21	9	set3	CEF	C	slow-regular	0.894	0.086	0.053
21	10	set3	DOR	B	slow-regular	0.845	0.077	0.048
21	5	set3	CEF	C	fast-regular	0.972	0.087	0.07
21	6	set3	CEF	C	fast-regular	0.855	0.12	0.089
21	7	set3	DOR	B	fast-regular	0.838	0.249	0.172
21	13	set3	CAR	A	random	0.835	0.04	0.028
21	16	set3	DOR	B	random	0.907	0.145	0.094
21	15	set3	CEF	C	random	0.964	0.05	0.044
21	12	set3	DOR	B	random	0.749	0.23	0.17
21	11	set3	DOR	B	random	0.776	0.284	0.249
21	1	set3	CAR	A	mono	0.817	0.084	0.05
21	2	set3	DOR	B	mono	0.908	0.045	0.025
21	3	set3	CEF	C	mono	0.885	0.068	0.04
22	11	set3	CEF	C	random	0.795	0.298	0.262
22	14	set3	CEF	C	random	0.924	0.094	0.065
22	8	set3	CEF	C	slow-regular	0.937	0.081	0.048
22	9	set3	CEF	C	slow-regular	0.906	0.097	0.06
22	10	set3	DOR	B	slow-regular	0.952	0.154	0.096
22	12	set3	CAR	A	random	0.777	0.257	0.19
22	5	set3	CAR	A	fast-regular	0.925	0.125	0.1
22	6	set3	DOR	B	fast-regular	0.754	0.071	0.053
22	7	set3	CEF	C	fast-regular	0.848	0.247	0.171
22	13	set3	CEF	C	random	0.877	0.084	0.058
22	16	set3	DOR	B	random	0.977	0.152	0.099
22	15	set3	CEF	C	random	0.944	0.046	0.041
22	1	set3	CAR	A	mono	0.813	0.073	0.043
22	2	set3	DOR	B	mono	0.914	0.072	0.041
22	3	set3	CEF	C	mono	0.866	0.078	0.046
23	11	set3	CEF	C	random	0.811	0.331	0.29
23	8	set3	CEF	C	slow-regular	0.959	0.064	0.038
23	9	set3	CEF	C	slow-regular	0.949	0.094	0.058
23	10	set3	DOR	B	slow-regular	0.977	0.138	0.086
23	14	set3	DOR	B	random	0.88	0.089	0.061
23	5	set3	DOR	B	fast-regular	0.888	0.094	0.075
23	6	set3	CAR	A	fast-regular	0.9	0.05	0.037
23	7	set3	CAR	A	fast-regular	0.778	0.222	0.154
23	16	set3	CAR	A	random	0.893	0.094	0.062
23	13	set3	CEF	C	random	0.906	0.071	0.049
23	15	set3	DOR	B	random	0.99	0.071	0.062
23	12	set3	DOR	B	random	0.779	0.248	0.184
23	1	set3	CAR	A	mono	0.856	0.066	0.039
23	2	set3	DOR	B	mono	0.945	0.088	0.05
23	3	set3	CEF	C	mono	0.885	0.092	0.055
24	14	set3	CEF	C	random	0.94	0.072	0.05
24	11	set3	CEF	C	random	0.789	0.287	0.251
24	5	set3	CEF	C	fast-regular	0.961	0.081	0.065
24	6	set3	CEF	C	fast-regular	0.855	0.135	0.1
24	7	set3	DOR	B	fast-regular	0.817	0.241	0.167
24	8	set3	CEF	C	slow-regular	0.951	0.103	0.061
24	9	set3	CEF	C	slow-regular	0.958	0.124	0.077
24	10	set3	DOR	B	slow-regular	0.963	0.143	0.088
24	12	set3	CAR	A	random	0.79	0.264	0.196
24	16	set3	CEF	C	random	0.958	0.063	0.041
24	13	set3	CEF	C	random	0.904	0.073	0.051
24	15	set3	CEF	C	random	1.009	0.032	0.028
24	1	set3	CAR	A	mono	0.86	0.086	0.051
24	2	set3	DOR	B	mono	0.931	0.085	0.048
24	3	set3	CEF	C	mono	0.906	0.062	0.037
25	11	set3	CEF	C	random	0.879	0.144	0.127
25	13	set3	DOR	B	random	0.873	0.098	0.068
25	14	set3	DOR	B	random	0.837	0.127	0.088
25	5	set3	CAR	A	fast-regular	0.892	0.122	0.098
25	6	set3	DOR	B	fast-regular	0.729	0.113	0.084
25	7	set3	CEF	C	fast-regular	0.92	0.081	0.056
25	8	set3	CAR	A	slow-regular	0.904	0.089	0.053
25	9	set3	DOR	B	slow-regular	0.862	0.138	0.078
25	10	set3	CEF	C	slow-regular	0.953	0.053	0.037
25	12	set3	CAR	A	random	0.825	0.164	0.121
25	16	set3	CAR	A	random	0.905	0.117	0.077
25	15	set3	CEF	C	random	0.954	0.072	0.063
25	1	set3	CAR	A	mono	0.88	0.057	0.033
25	2	set3	DOR	B	mono	0.819	0.081	0.046
25	3	set3	CEF	C	mono	0.897	0.067	0.04
26	15	set3	CAR	A	random	0.929	0.035	0.031
26	14	set3	CEF	C	random	0.978	0.054	0.037
26	5	set3	DOR	B	fast-regular	0.818	0.164	0.131
26	6	set3	CAR	A	fast-regular	0.943	0.047	0.035
26	7	set3	CAR	A	fast-regular	0.858	0.071	0.049
26	11	set3	CEF	C	random	0.909	0.124	0.109
26	13	set3	DOR	B	random	0.953	0.044	0.03
26	8	set3	CAR	A	slow-regular	0.857	0.136	0.081
26	9	set3	DOR	B	slow-regular	0.939	0.138	0.078
26	10	set3	CEF	C	slow-regular	0.995	0.076	0.053
26	16	set3	CAR	A	random	0.857	0.081	0.053
26	12	set3	DOR	B	random	0.783	0.148	0.11
26	1	set3	CAR	A	mono	0.901	0.068	0.04
26	2	set3	DOR	B	mono	0.915	0.08	0.045
26	3	set3	CEF	C	mono	0.916	0.047	0.028
27	11	set3	CAR	A	random	0.901	0.12	0.105
27	14	set3	CEF	C	random	0.907	0.042	0.029
27	5	set3	CEF	C	fast-regular	0.933	0.056	0.045
27	6	set3	CEF	C	fast-regular	0.882	0.058	0.043
27	7	set3	DOR	B	fast-regular	0.887	0.113	0.078
27	12	set3	CAR	A	random	0.837	0.132	0.098
27	13	set3	DOR	B	random	0.905	0.038	0.027
27	15	set3	DOR	B	random	0.959	0.053	0.046
27	8	set3	CAR	A	slow-regular	0.822	0.115	0.068
27	9	set3	DOR	B	slow-regular	0.885	0.102	0.058
27	10	set3	CEF	C	slow-regular	0.921	0.055	0.038
27	16	set3	CAR	A	random	0.872	0.071	0.046
27	1	set3	CAR	A	mono	0.858	0.07	0.042
27	2	set3	DOR	B	mono	0.897	0.056	0.032
27	3	set3	CEF	C	mono	0.855	0.066	0.039
28	13	set3	CAR	A	random	0.85	0.069	0.048
28	16	set3	CEF	C	random	0.939	0.055	0.036
28	5	set3	CAR	A	fast-regular	0.892	0.107	0.086
28	6	set3	DOR	B	fast-regular	0.732	0.074	0.055
28	7	set3	CEF	C	fast-regular	0.912	0.038	0.026
28	8	set3	CAR	A	slow-regular	0.843	0.114	0.067
28	9	set3	DOR	B	slow-regular	0.925	0.142	0.08
28	10	set3	CEF	C	slow-regular	0.928	0.068	0.047
28	12	set3	DOR	B	random	0.838	0.135	0.1
28	14	set3	CAR	A	random	0.893	0.088	0.061
28	15	set3	CEF	C	random	0.983	0.048	0.042
28	11	set3	DOR	B	random	0.832	0.121	0.106
28	1	set3	CAR	A	mono	0.865	0.067	0.04
28	2	set3	DOR	B	mono	0.884	0.064	0.036
28	3	set3	CEF	C	mono	0.888	0.053	0.032
29	11	set3	CAR	A	random	0.909	0.1	0.087
29	15	set3	CAR	A	random	0.909	0.039	0.034
29	8	set3	DOR	B	slow-regular	0.846	0.135	0.076
29	9	set3	CAR	A	slow-regular	0.93	0.064	0.036
29	10	set3	CAR	A	slow-regular	0.902	0.022	0.015
29	13	set3	CAR	A	random	0.787	0.047	0.032
29	16	set3	DOR	B	random	0.907	0.161	0.105
29	5	set3	DOR	B	fast-regular	0.838	0.117	0.094
29	6	set3	CAR	A	fast-regular	0.921	0.06	0.044
29	7	set3	CAR	A	fast-regular	0.85	0.066	0.046
29	12	set3	CAR	A	random	0.851	0.118	0.087
29	14	set3	CAR	A	random	0.88	0.1	0.069
29	1	set3	CAR	A	mono	0.869	0.064	0.038
29	2	set3	DOR	B	mono	0.909	0.098	0.055
29	3	set3	CEF	C	mono	0.915	0.044	0.026
30	12	set3	CEF	C	random	0.871	0.088	0.065
30	14	set3	DOR	B	random	0.832	0.118	0.082
30	5	set3	CEF	C	fast-regular	0.946	0.085	0.068
30	6	set3	CEF	C	fast-regular	0.887	0.08	0.06
30	7	set3	DOR	B	fast-regular	0.871	0.082	0.057
30	8	set3	DOR	B	slow-regular	0.871	0.075	0.043
30	9	set3	CAR	A	slow-regular	0.883	0.049	0.028
30	10	set3	CAR	A	slow-regular	0.799	0.086	0.059
30	11	set3	CEF	C	random	0.927	0.093	0.082
30	16	set3	DOR	B	random	0.899	0.14	0.091
30	13	set3	CEF	C	random	0.84	0.076	0.053
30	15	set3	DOR	B	random	0.926	0.076	0.066
30	1	set3	CAR	A	mono	0.85	0.07	0.041
30	2	set3	DOR	B	mono	0.891	0.065	0.037
30	3	set3	CEF	C	mono	0.879	0.05	0.03
31	14	set3	CEF	C	random	0.968	0.048	0.034
31	5	set3	CAR	A	fast-regular	0.928	0.144	0.115
31	6	set3	DOR	B	fast-regular	0.808	0.073	0.054
31	7	set3	CEF	C	fast-regular	0.962	0.067	0.046
31	8	set3	DOR	B	slow-regular	0.91	0.098	0.058
31	9	set3	CAR	A	slow-regular	0.896	0.086	0.049
31	10	set3	CAR	A	slow-regular	0.812	0.09	0.062
31	12	set3	CAR	A	random	0.907	0.079	0.059
31	13	set3	CEF	C	random	0.941	0.071	0.05
31	16	set3	CAR	A	random	0.926	0.127	0.083
31	15	set3	CEF	C	random	0.998	0.042	0.037
31	11	set3	DOR	B	random	0.895	0.107	0.094
31	1	set3	CAR	A	mono	0.919	0.09	0.053
31	2	set3	DOR	B	mono	0.932	0.082	0.046
31	3	set3	CEF	C	mono	0.941	0.072	0.042
32	11	set3	CAR	A	random	0.913	0.072	0.063
32	15	set3	CAR	A	random	0.967	0.067	0.059
32	16	set3	CEF	C	random	1.005	0.085	0.055
32	5	set3	DOR	B	fast-regular	0.829	0.166	0.133
32	6	set3	CAR	A	fast-regular	0.918	0.042	0.031
32	7	set3	CAR	A	fast-regular	1.006	0.341	0.236
32	8	set3	DOR	B	slow-regular	0.885	0.075	0.044
32	9	set3	CAR	A	slow-regular	0.901	0.056	0.031
32	10	set3	CAR	A	slow-regular	0.853	0.085	0.059
32	12	set3	CAR	A	random	0.96	0.296	0.22
32	13	set3	CEF	C	random	0.913	0.054	0.038
32	14	set3	CAR	A	random	0.904	0.086	0.059
32	1	set3	CAR	A	mono	0.913	0.089	0.052
32	2	set3	DOR	B	mono	0.887	0.082	0.047
32	3	set3	CEF	C	mono	0.935	0.06	0.035
33	12	set3	CEF	C	random	0.928	0.112	0.083
33	8	set3	CEF	C	slow-regular	0.96	0.035	0.021
33	9	set3	CEF	C	slow-regular	0.945	0.086	0.049
33	10	set3	DOR	B	slow-regular	0.802	0.067	0.046
33	15	set3	CAR	A	random	0.936	0.148	0.13
33	14	set3	DOR	B	random	0.819	0.128	0.089
33	5	set3	CEF	C	fast-regular	1.008	0.073	0.058
33	6	set3	CEF	C	fast-regular	0.925	0.064	0.047
33	7	set3	DOR	B	fast-regular	0.918	0.157	0.109
33	11	set3	CEF	C	random	0.946	0.056	0.049
33	13	set3	DOR	B	random	0.912	0.125	0.086
33	16	set3	CEF	C	random	0.975	0.065	0.043
33	1	set3	CAR	A	mono	0.918	0.089	0.053
33	2	set3	DOR	B	mono	0.902	0.062	0.035
33	3	set3	CEF	C	mono	0.95	0.077	0.045
34	8	set3	CEF	C	slow-regular	0.982	0.091	0.054
34	9	set3	CEF	C	slow-regular	0.947	0.07	0.04
34	10	set3	DOR	B	slow-regular	0.892	0.122	0.084
34	15	set3	CAR	A	random	0.867	0.093	0.081
34	5	set3	CAR	A	fast-regular	0.881	0.119	0.095
34	6	set3	DOR	B	fast-regular	0.767	0.12	0.089
34	7	set3	CEF	C	fast-regular	0.939	0.046	0.032
34	11	set3	CEF	C	random	0.909	0.065	0.057
34	12	set3	DOR	B	random	0.902	0.144	0.107
34	16	set3	CAR	A	random	0.916	0.089	0.058
34	13	set3	CEF	C	random	0.965	0.075	0.052
34	14	set3	CAR	A	random	0.895	0.053	0.037
34	1	set3	CAR	A	mono	0.872	0.089	0.053
34	2	set3	DOR	B	mono	0.887	0.08	0.045
34	3	set3	CEF	C	mono	0.906	0.076	0.045
35	11	set3	CAR	A	random	0.908	0.118	0.103
35	13	set3	CAR	A	random	0.905	0.062	0.043
35	8	set3	CEF	C	slow-regular	0.958	0.061	0.036
35	9	set3	CEF	C	slow-regular	1.012	0.102	0.058
35	10	set3	DOR	B	slow-regular	0.944	0.069	0.048
35	14	set3	DOR	B	random	0.803	0.16	0.111
35	15	set3	CAR	A	random	0.922	0.241	0.212
35	5	set3	DOR	B	fast-regular	0.882	0.179	0.143
35	6	set3	CAR	A	fast-regular	0.97	0.089	0.066
35	7	set3	CAR	A	fast-regular	0.871	0.085	0.059
35	16	set3	CEF	C	random	1	0.07	0.046
35	12	set3	DOR	B	random	0.989	0.102	0.076
35	1	set3	CAR	A	mono	0.909	0.086	0.051
35	2	set3	DOR	B	mono	0.932	0.085	0.048
35	3	set3	CEF	C	mono	0.943	0.073	0.043
36	12	set3	CEF	C	random	0.971	0.035	0.026
36	13	set3	CAR	A	random	0.773	0.117	0.081
36	16	set3	DOR	B	random	0.92	0.165	0.108
36	5	set3	CEF	C	fast-regular	0.981	0.045	0.036
36	6	set3	CEF	C	fast-regular	0.958	0.08	0.059
36	7	set3	DOR	B	fast-regular	0.918	0.143	0.099
36	8	set3	CEF	C	slow-regular	0.982	0.07	0.041
36	9	set3	CEF	C	slow-regular	1.06	0.084	0.048
36	10	set3	DOR	B	slow-regular	1.012	0.114	0.079
36	15	set3	CEF	C	random	0.965	0.056	0.049
36	11	set3	DOR	B	random	0.883	0.202	0.177
36	14	set3	CAR	A	random	0.926	0.082	0.057
36	1	set3	CAR	A	mono	0.891	0.062	0.037
36	2	set3	DOR	B	mono	0.91	0.055	0.031
36	3	set3	CEF	C	mono	0.969	0.074	0.044
37	12	set3	CEF	C	random	0.944	0.06	0.045
37	14	set3	DOR	B	random	0.778	0.157	0.109
37	5	set3	CAR	A	fast-regular	0.911	0.129	0.103
37	6	set3	DOR	B	fast-regular	0.78	0.124	0.092
37	7	set3	CEF	C	fast-regular	0.936	0.034	0.023
37	8	set3	CAR	A	slow-regular	0.897	0.081	0.048
37	9	set3	DOR	B	slow-regular	0.912	0.149	0.084
37	10	set3	CEF	C	slow-regular	0.932	0.038	0.026
37	11	set3	CEF	C	random	0.947	0.038	0.034
37	16	set3	CEF	C	random	0.997	0.089	0.058
37	13	set3	CEF	C	random	0.887	0.097	0.067
37	15	set3	CEF	C	random	1.022	0.05	0.044
37	1	set3	CAR	A	mono	0.93	0.177	0.105
37	2	set3	DOR	B	mono	0.893	0.087	0.049
37	3	set3	CEF	C	mono	0.91	0.048	0.028
38	11	set3	CAR	A	random	0.864	0.124	0.108
38	14	set3	CEF	C	random	0.943	0.066	0.045
38	12	set3	CEF	C	random	0.927	0.07	0.052
38	13	set3	CAR	A	random	0.827	0.085	0.059
38	15	set3	CAR	A	random	0.942	0.032	0.028
38	16	set3	DOR	B	random	0.948	0.15	0.098
38	5	set3	DOR	B	fast-regular	0.839	0.128	0.102
38	6	set3	CAR	A	fast-regular	0.907	0.05	0.037
38	7	set3	CAR	A	fast-regular	0.877	0.068	0.047
38	8	set3	CAR	A	slow-regular	0.882	0.104	0.061
38	9	set3	DOR	B	slow-regular	0.938	0.155	0.088
38	10	set3	CEF	C	slow-regular	0.972	0.102	0.071
38	1	set3	CAR	A	mono	0.9	0.072	0.043
38	2	set3	DOR	B	mono	0.883	0.075	0.042
38	3	set3	CEF	C	mono	0.933	0.076	0.045
39	11	set3	CAR	A	random	0.915	0.138	0.121
39	14	set3	CEF	C	random	0.975	0.063	0.044
39	5	set3	CEF	C	fast-regular	0.975	0.052	0.042
39	6	set3	CEF	C	fast-regular	0.931	0.072	0.053
39	7	set3	DOR	B	fast-regular	0.875	0.078	0.054
39	13	set3	CAR	A	random	0.785	0.102	0.071
39	16	set3	CAR	A	random	0.944	0.056	0.037
39	8	set3	CAR	A	slow-regular	0.866	0.106	0.062
39	9	set3	DOR	B	slow-regular	0.978	0.134	0.076
39	10	set3	CEF	C	slow-regular	0.97	0.052	0.036
39	12	set3	DOR	B	random	1.009	0.11	0.082
39	15	set3	CEF	C	random	0.962	0.036	0.031
39	1	set3	CAR	A	mono	0.914	0.086	0.051
39	2	set3	DOR	B	mono	0.943	0.107	0.061
39	3	set3	CEF	C	mono	0.947	0.07	0.041
40	11	set3	CAR	A	random	0.896	0.093	0.081
40	12	set3	CEF	C	random	1.03	0.066	0.049
40	14	set3	CEF	C	random	0.959	0.055	0.038
40	15	set3	CAR	A	random	1.001	0.129	0.113
40	5	set3	CAR	A	fast-regular	0.914	0.082	0.066
40	6	set3	DOR	B	fast-regular	0.813	0.139	0.103
40	7	set3	CEF	C	fast-regular	0.942	0.067	0.046
40	13	set3	CAR	A	random	0.852	0.127	0.088
40	16	set3	CEF	C	random	0.987	0.055	0.036
40	8	set3	CAR	A	slow-regular	0.876	0.098	0.058
40	9	set3	DOR	B	slow-regular	0.933	0.096	0.054
40	10	set3	CEF	C	slow-regular	0.953	0.037	0.026
40	1	set3	CAR	A	mono	0.928	0.074	0.044
40	2	set3	DOR	B	mono	0.912	0.07	0.04
40	3	set3	CEF	C	mono	0.935	0.069	0.041
41	13	set3	DOR	B	random	0.879	0.158	0.109
41	8	set3	DOR	B	slow-regular	0.866	0.091	0.054
41	9	set3	CAR	A	slow-regular	0.997	0.075	0.042
41	10	set3	CAR	A	slow-regular	0.944	0.037	0.025
41	12	set3	CEF	C	random	0.99	0.06	0.045
41	5	set3	DOR	B	fast-regular	0.898	0.088	0.071
41	6	set3	CAR	A	fast-regular	0.967	0.088	0.065
41	7	set3	CAR	A	fast-regular	0.93	0.069	0.048
41	11	set3	CEF	C	random	0.974	0.081	0.071
41	15	set3	CAR	A	random	0.898	0.191	0.168
41	16	set3	CEF	C	random	0.983	0.088	0.057
41	14	set3	CAR	A	random	0.941	0.072	0.05
41	1	set3	CAR	A	mono	0.944	0.068	0.04
41	2	set3	DOR	B	mono	0.979	0.063	0.036
41	3	set3	CEF	C	mono	0.962	0.05	0.03
42	5	set3	CEF	C	fast-regular	0.97	0.036	0.029
42	6	set3	CEF	C	fast-regular	0.958	0.093	0.069
42	7	set3	DOR	B	fast-regular	0.928	0.102	0.071
42	8	set3	DOR	B	slow-regular	0.886	0.097	0.057
42	9	set3	CAR	A	slow-regular	0.965	0.09	0.051
42	10	set3	CAR	A	slow-regular	0.922	0.046	0.032
42	12	set3	CEF	C	random	1.019	0.082	0.061
42	11	set3	CEF	C	random	0.94	0.052	0.046
42	13	set3	CAR	A	random	0.933	0.086	0.06
42	16	set3	CEF	C	random	1.001	0.069	0.045
42	15	set3	CEF	C	random	0.991	0.05	0.044
42	14	set3	CAR	A	random	0.917	0.066	0.046
42	1	set3	CAR	A	mono	0.949	0.057	0.034
42	2	set3	DOR	B	mono	0.947	0.049	0.027
42	3	set3	CEF	C	mono	0.982	0.058	0.034
43	15	set3	DOR	B	random	0.924	0.096	0.084
43	13	set3	DOR	B	random	0.799	0.148	0.102
43	14	set3	CEF	C	random	0.917	0.057	0.04
43	5	set3	CAR	A	fast-regular	0.91	0.09	0.072
43	6	set3	DOR	B	fast-regular	0.819	0.085	0.063
43	7	set3	CEF	C	fast-regular	0.908	0.041	0.028
43	8	set3	DOR	B	slow-regular	0.904	0.109	0.064
43	9	set3	CAR	A	slow-regular	0.894	0.053	0.03
43	10	set3	CAR	A	slow-regular	0.878	0.068	0.047
43	16	set3	CAR	A	random	0.945	0.066	0.043
43	11	set3	DOR	B	random	0.865	0.097	0.085
43	12	set3	DOR	B	random	1.041	0.089	0.066
43	1	set3	CAR	A	mono	0.917	0.066	0.039
43	2	set3	DOR	B	mono	0.896	0.045	0.025
43	3	set3	CEF	C	mono	0.936	0.069	0.041
44	16	set3	DOR	B	random	0.853	0.088	0.057
44	12	set3	CAR	A	random	0.934	0.049	0.037
44	14	set3	CEF	C	random	0.944	0.062	0.043
44	5	set3	DOR	B	fast-regular	0.803	0.152	0.122
44	6	set3	CAR	A	fast-regular	0.928	0.047	0.035
44	7	set3	CAR	A	fast-regular	0.914	0.109	0.075
44	15	set3	CAR	A	random	0.955	0.027	0.024
44	8	set3	DOR	B	slow-regular	0.912	0.083	0.049
44	9	set3	CAR	A	slow-regular	0.917	0.077	0.043
44	10	set3	CAR	A	slow-regular	0.904	0.072	0.05
44	13	set3	CAR	A	random	0.891	0.081	0.056
44	11	set3	DOR	B	random	0.852	0.123	0.108
44	1	set3	CAR	A	mono	0.922	0.083	0.049
44	2	set3	DOR	B	mono	0.911	0.078	0.044
44	3	set3	CEF	C	mono	0.956	0.053	0.031
45	8	set3	CEF	C	slow-regular	0.958	0.05	0.03
45	9	set3	CEF	C	slow-regular	0.95	0.062	0.035
45	10	set3	DOR	B	slow-regular	0.828	0.095	0.066
45	14	set3	DOR	B	random	0.861	0.1	0.069
45	13	set3	DOR	B	random	0.861	0.148	0.103
45	16	set3	DOR	B	random	0.954	0.134	0.087
45	5	set3	CEF	C	fast-regular	0.942	0.035	0.028
45	6	set3	CEF	C	fast-regular	0.926	0.043	0.032
45	7	set3	DOR	B	fast-regular	0.925	0.07	0.049
45	12	set3	CEF	C	random	0.939	0.076	0.056
45	11	set3	DOR	B	random	0.867	0.141	0.123
45	15	set3	CEF	C	random	0.916	0.044	0.039
45	1	set3	CAR	A	mono	0.918	0.079	0.047
45	2	set3	DOR	B	mono	0.886	0.056	0.032
45	3	set3	CEF	C	mono	0.914	0.066	0.039
46	11	set3	CAR	A	random	0.897	0.099	0.086
46	8	set3	CEF	C	slow-regular	0.968	0.073	0.043
46	9	set3	CEF	C	slow-regular	0.95	0.067	0.038
46	10	set3	DOR	B	slow-regular	0.925	0.079	0.055
46	14	set3	DOR	B	random	0.835	0.131	0.091
46	12	set3	CAR	A	random	0.903	0.065	0.048
46	5	set3	CAR	A	fast-regular	0.892	0.076	0.061
46	6	set3	DOR	B	fast-regular	0.802	0.108	0.08
46	7	set3	CEF	C	fast-regular	0.944	0.031	0.021
46	15	set3	CAR	A	random	0.958	0.052	0.046
46	16	set3	CAR	A	random	0.967	0.076	0.049
46	13	set3	CAR	A	random	0.876	0.078	0.054
46	1	set3	CAR	A	mono	0.904	0.042	0.025
46	2	set3	DOR	B	mono	0.938	0.104	0.059
46	3	set3	CEF	C	mono	0.95	0.037	0.022
47	15	set3	DOR	B	random	0.905	0.183	0.16
47	11	set3	CAR	A	random	0.905	0.12	0.105
47	8	set3	CEF	C	slow-regular	0.977	0.086	0.051
47	9	set3	CEF	C	slow-regular	0.946	0.076	0.043
47	10	set3	DOR	B	slow-regular	0.98	0.123	0.085
47	14	set3	CEF	C	random	0.957	0.053	0.037
47	5	set3	DOR	B	fast-regular	0.815	0.136	0.109
47	6	set3	CAR	A	fast-regular	0.932	0.042	0.031
47	7	set3	CAR	A	fast-regular	0.91	0.074	0.051
47	12	set3	CEF	C	random	0.964	0.118	0.087
47	13	set3	CEF	C	random	0.924	0.102	0.071
47	16	set3	CAR	A	random	0.95	0.082	0.054
47	1	set3	CAR	A	mono	0.958	0.135	0.08
47	2	set3	DOR	B	mono	0.923	0.082	0.046
47	3	set3	CEF	C	mono	0.963	0.066	0.039
48	11	set3	CAR	A	random	0.91	0.094	0.082
48	14	set3	DOR	B	random	0.913	0.135	0.094
48	16	set3	DOR	B	random	0.98	0.13	0.085
48	5	set3	CEF	C	fast-regular	0.967	0.031	0.025
48	6	set3	CEF	C	fast-regular	0.93	0.054	0.04
48	7	set3	DOR	B	fast-regular	0.976	0.064	0.045
48	8	set3	CEF	C	slow-regular	0.986	0.07	0.041
48	9	set3	CEF	C	slow-regular	0.992	0.081	0.046
48	10	set3	DOR	B	slow-regular	0.99	0.076	0.053
48	12	set3	CEF	C	random	0.977	0.052	0.039
48	13	set3	CAR	A	random	0.911	0.094	0.065
48	15	set3	CEF	C	random	1.024	0.075	0.066
48	1	set3	CAR	A	mono	0.945	0.076	0.045
48	2	set3	DOR	B	mono	0.947	0.077	0.043
48	3	set3	CEF	C	mono	0.946	0.09	0.053
49	15	set3	DOR	B	random	0.97	0.126	0.111
49	13	set3	DOR	B	random	0.819	0.124	0.086
49	11	set3	CEF	C	random	0.924	0.063	0.056
49	14	set3	CEF	C	random	0.949	0.035	0.024
49	5	set3	CAR	A	fast-regular	0.916	0.105	0.084
49	6	set3	DOR	B	fast-regular	0.85	0.096	0.071
49	7	set3	CEF	C	fast-regular	0.971	0.09	0.062
49	8	set3	CAR	A	slow-regular	0.935	0.079	0.047
49	9	set3	DOR	B	slow-regular	0.894	0.119	0.067
49	10	set3	CEF	C	slow-regular	0.964	0.068	0.047
49	16	set3	CEF	C	random	1.006	0.052	0.034
49	12	set3	CEF	C	random	1.013	0.166	0.123
49	1	set3	CAR	A	mono	0.91	0.07	0.041
49	2	set3	DOR	B	mono	0.944	0.066	0.038
49	3	set3	CEF	C	mono	0.96	0.069	0.041
50	15	set3	DOR	B	random	1.029	0.122	0.107
50	11	set3	CAR	A	random	0.873	0.112	0.098
50	14	set3	DOR	B	random	0.854	0.087	0.06
50	16	set3	DOR	B	random	0.932	0.101	0.066
50	5	set3	DOR	B	fast-regular	0.925	0.112	0.09
50	6	set3	CAR	A	fast-regular	0.965	0.086	0.064
50	7	set3	CAR	A	fast-regular	0.839	0.063	0.044
50	12	set3	DOR	B	random	0.975	0.078	0.058
50	13	set3	CEF	C	random	1.014	0.146	0.101
50	8	set3	CAR	A	slow-regular	0.872	0.079	0.047
50	9	set3	DOR	B	slow-regular	0.941	0.129	0.073
50	10	set3	CEF	C	slow-regular	0.963	0.081	0.056
50	1	set3	CAR	A	mono	0.883	0.075	0.044
50	2	set3	DOR	B	mono	0.91	0.065	0.037
50	3	set3	CEF	C	mono	0.948	0.051	0.03
51	5	set3	CEF	C	fast-regular	0.857	0.039	0.031
51	6	set3	CEF	C	fast-regular	0.84	0.068	0.05
51	7	set3	DOR	B	fast-regular	0.876	0.098	0.068
51	11	set3	CEF	C	random	0.802	0.12	0.106
51	14	set3	DOR	B	random	0.862	0.158	0.109
51	12	set3	DOR	B	random	0.893	0.095	0.07
51	13	set3	CEF	C	random	0.868	0.064	0.044
51	16	set3	CEF	C	random	0.919	0.057	0.037
51	8	set3	CAR	A	slow-regular	0.828	0.094	0.056
51	9	set3	DOR	B	slow-regular	0.86	0.125	0.071
51	10	set3	CEF	C	slow-regular	0.9	0.078	0.054
51	15	set3	CEF	C	random	0.93	0.074	0.065
51	1	set3	CAR	A	mono	0.846	0.073	0.043
51	2	set3	DOR	B	mono	0.865	0.1	0.057
51	3	set3	CEF	C	mono	0.857	0.054	0.032
52	12	set3	CAR	A	random	0.924	0.049	0.036
52	15	set3	DOR	B	random	1.016	0.12	0.105
52	11	set3	CAR	A	random	0.87	0.112	0.098
52	14	set3	CEF	C	random	0.938	0.04	0.028
52	16	set3	DOR	B	random	0.984	0.146	0.096
52	5	set3	CAR	A	fast-regular	0.9	0.089	0.071
52	6	set3	DOR	B	fast-regular	0.869	0.074	0.055
52	7	set3	CEF	C	fast-regular	0.968	0.062	0.043
52	13	set3	CAR	A	random	0.877	0.089	0.062
52	8	set3	CAR	A	slow-regular	0.875	0.065	0.038
52	9	set3	DOR	B	slow-regular	0.987	0.127	0.072
52	10	set3	CEF	C	slow-regular	0.985	0.094	0.065
52	1	set3	CAR	A	mono	0.898	0.074	0.044
52	2	set3	DOR	B	mono	0.971	0.075	0.043
52	3	set3	CEF	C	mono	0.943	0.045	0.026
53	8	set3	DOR	B	slow-regular	0.872	0.105	0.062
53	9	set3	CAR	A	slow-regular	0.975	0.068	0.038
53	10	set3	CAR	A	slow-regular	0.952	0.028	0.02
53	5	set3	DOR	B	fast-regular	0.971	0.105	0.084
53	6	set3	CAR	A	fast-regular	0.941	0.036	0.027
53	7	set3	CAR	A	fast-regular	0.912	0.052	0.036
53	11	set3	CAR	A	random	0.917	0.092	0.081
53	16	set3	CAR	A	random	0.986	0.07	0.046
53	12	set3	CEF	C	random	0.987	0.102	0.076
53	13	set3	CEF	C	random	0.932	0.097	0.067
53	14	set3	CAR	A	random	0.935	0.098	0.068
53	15	set3	CEF	C	random	1.01	0.058	0.051
53	1	set3	CAR	A	mono	0.92	0.065	0.038
53	2	set3	DOR	B	mono	0.982	0.079	0.045
53	3	set3	CEF	C	mono	0.986	0.068	0.04
54	13	set3	DOR	B	random	0.832	0.114	0.079
54	12	set3	CAR	A	random	0.903	0.09	0.067
54	15	set3	DOR	B	random	0.961	0.053	0.046
54	5	set3	CEF	C	fast-regular	0.947	0.049	0.039
54	6	set3	CEF	C	fast-regular	0.9	0.047	0.035
54	7	set3	DOR	B	fast-regular	0.95	0.074	0.051
54	8	set3	DOR	B	slow-regular	0.907	0.12	0.071
54	9	set3	CAR	A	slow-regular	0.926	0.069	0.039
54	10	set3	CAR	A	slow-regular	0.859	0.12	0.083
54	16	set3	DOR	B	random	0.975	0.096	0.063
54	11	set3	CAR	A	random	0.852	0.094	0.082
54	14	set3	CAR	A	random	0.873	0.074	0.051
54	1	set3	CAR	A	mono	0.885	0.062	0.037
54	2	set3	DOR	B	mono	0.94	0.075	0.043
54	3	set3	CEF	C	mono	0.931	0.082	0.049
55	11	set3	CEF	C	random	0.957	0.048	0.042
55	12	set3	CAR	A	random	0.881	0.095	0.07
55	15	set3	DOR	B	random	1.103	0.052	0.046
55	5	set3	CAR	A	fast-regular	0.937	0.112	0.089
55	6	set3	DOR	B	fast-regular	0.921	0.035	0.026
55	7	set3	CEF	C	fast-regular	0.97	0.029	0.02
55	8	set3	DOR	B	slow-regular	0.959	0.072	0.042
55	9	set3	CAR	A	slow-regular	0.933	0.079	0.045
55	10	set3	CAR	A	slow-regular	0.896	0.05	0.035
55	16	set3	CEF	C	random	1.008	0.031	0.02
55	13	set3	CAR	A	random	0.927	0.078	0.054
55	14	set3	CAR	A	random	0.889	0.08	0.055
55	1	set3	CAR	A	mono	0.925	0.071	0.042
55	2	set3	DOR	B	mono	0.981	0.091	0.052
55	3	set3	CEF	C	mono	0.952	0.083	0.049
56	14	set3	DOR	B	random	0.855	0.13	0.09
56	5	set3	DOR	B	fast-regular	0.962	0.042	0.033
56	6	set3	CAR	A	fast-regular	0.987	0.056	0.041
56	7	set3	CAR	A	fast-regular	0.924	0.065	0.045
56	11	set3	DOR	B	random	0.888	0.147	0.129
56	12	set3	DOR	B	random	1.011	0.115	0.085
56	15	set3	DOR	B	random	1.079	0.071	0.062
56	16	set3	DOR	B	random	0.984	0.07	0.046
56	8	set3	DOR	B	slow-regular	0.961	0.058	0.034
56	9	set3	CAR	A	slow-regular	0.931	0.113	0.064
56	10	set3	CAR	A	slow-regular	0.923	0.095	0.066
56	13	set3	CAR	A	random	0.91	0.058	0.04
56	1	set3	CAR	A	mono	0.962	0.063	0.037
56	2	set3	DOR	B	mono	0.984	0.072	0.041
56	3	set3	CEF	C	mono	0.989	0.047	0.028
57	8	set3	CEF	C	slow-regular	0.943	0.081	0.048
57	9	set3	CEF	C	slow-regular	0.944	0.108	0.061
57	10	set3	DOR	B	slow-regular	0.885	0.089	0.061
57	13	set3	DOR	B	random	0.79	0.104	0.072
57	15	set3	CAR	A	random	0.968	0.069	0.061
57	14	set3	CEF	C	random	0.933	0.054	0.037
57	5	set3	CEF	C	fast-regular	0.917	0.054	0.043
57	6	set3	CEF	C	fast-regular	0.939	0.054	0.04
57	7	set3	DOR	B	fast-regular	1.016	0.108	0.075
57	16	set3	CAR	A	random	0.952	0.139	0.091
57	11	set3	DOR	B	random	0.847	0.155	0.136
57	12	set3	CEF	C	random	0.987	0.101	0.075
57	1	set3	CAR	A	mono	0.914	0.067	0.039
57	2	set3	DOR	B	mono	0.932	0.089	0.05
57	3	set3	CEF	C	mono	0.964	0.085	0.05
58	8	set3	CEF	C	slow-regular	0.934	0.111	0.065
58	9	set3	CEF	C	slow-regular	0.938	0.086	0.049
58	10	set3	DOR	B	slow-regular	0.935	0.073	0.05
58	15	set3	CAR	A	random	0.929	0.115	0.101
58	12	set3	CAR	A	random	0.911	0.073	0.054
58	14	set3	DOR	B	random	0.824	0.107	0.074
58	5	set3	CAR	A	fast-regular	0.87	0.128	0.102
58	6	set3	DOR	B	fast-regular	0.896	0.068	0.05
58	7	set3	CEF	C	fast-regular	0.924	0.066	0.046
58	11	set3	CAR	A	random	0.865	0.135	0.118
58	13	set3	CEF	C	random	0.883	0.07	0.049
58	16	set3	CAR	A	random	0.928	0.097	0.064
58	1	set3	CAR	A	mono	0.878	0.102	0.06
58	2	set3	DOR	B	mono	0.918	0.101	0.057
58	3	set3	CEF	C	mono	0.875	0.057	0.034
59	13	set3	DOR	B	random	0.892	0.146	0.101
59	8	set3	CEF	C	slow-regular	0.935	0.05	0.03
59	9	set3	CEF	C	slow-regular	0.965	0.068	0.038
59	10	set3	DOR	B	slow-regular	0.969	0.028	0.02
59	5	set3	DOR	B	fast-regular	0.929	0.057	0.046
59	6	set3	CAR	A	fast-regular	0.951	0.059	0.044
59	7	set3	CAR	A	fast-regular	0.881	0.076	0.052
59	12	set3	DOR	B	random	0.983	0.097	0.072
59	16	set3	CEF	C	random	0.953	0.034	0.022
59	11	set3	DOR	B	random	0.803	0.155	0.136
59	14	set3	CAR	A	random	0.903	0.082	0.057
59	15	set3	CEF	C	random	0.949	0.02	0.018
59	1	set3	CAR	A	mono	0.886	0.06	0.036
59	2	set3	DOR	B	mono	0.942	0.074	0.042
59	3	set3	CEF	C	mono	0.905	0.066	0.039
60	11	set3	CEF	C	random	0.998	0.07	0.061
60	5	set3	CEF	C	fast-regular	1.014	0.078	0.062
60	6	set3	CEF	C	fast-regular	1	0.061	0.045
60	7	set3	DOR	B	fast-regular	0.974	0.034	0.024
60	8	set3	CEF	C	slow-regular	0.992	0.067	0.04
60	9	set3	CEF	C	slow-regular	1.013	0.083	0.047
60	10	set3	DOR	B	slow-regular	1.045	0.061	0.042
60	14	set3	DOR	B	random	0.949	0.137	0.095
60	15	set3	DOR	B	random	1.079	0.133	0.117
60	16	set3	DOR	B	random	1.02	0.123	0.08
60	12	set3	CEF	C	random	1.014	0.08	0.059
60	13	set3	CEF	C	random	0.97	0.043	0.03
60	1	set3	CAR	A	mono	0.935	0.079	0.047
60	2	set3	DOR	B	mono	0.993	0.07	0.039
60	3	set3	CEF	C	mono	0.974	0.073	0.043
61	13	set3	DOR	B	random	0.879	0.067	0.046
61	15	set3	CAR	A	random	0.929	0.062	0.055
61	12	set3	CAR	A	random	0.865	0.086	0.064
61	5	set3	CAR	A	fast-regular	0.855	0.088	0.071
61	6	set3	DOR	B	fast-regular	0.893	0.123	0.091
61	7	set3	CEF	C	fast-regular	0.946	0.085	0.059
61	8	set3	CAR	A	slow-regular	0.869	0.06	0.036
61	9	set3	DOR	B	slow-regular	0.84	0.137	0.078
61	10	set3	CEF	C	slow-regular	0.946	0.094	0.065
61	16	set3	CAR	A	random	0.958	0.087	0.057
61	11	set3	DOR	B	random	0.84	0.083	0.073
61	14	set3	CAR	A	random	0.894	0.069	0.048
61	1	set3	CAR	A	mono	0.88	0.062	0.037
61	2	set3	DOR	B	mono	0.891	0.091	0.052
61	3	set3	CEF	C	mono	0.872	0.07	0.041
62	11	set3	CEF	C	random	0.946	0.063	0.056
62	13	set3	DOR	B	random	0.886	0.05	0.035
62	5	set3	DOR	B	fast-regular	0.894	0.053	0.043
62	6	set3	CAR	A	fast-regular	0.918	0.03	0.022
62	7	set3	CAR	A	fast-regular	0.889	0.05	0.035
62	12	set3	DOR	B	random	0.914	0.075	0.055
62	16	set3	CEF	C	random	0.987	0.061	0.04
62	8	set3	CAR	A	slow-regular	0.898	0.066	0.039
62	9	set3	DOR	B	slow-regular	0.912	0.127	0.072
62	10	set3	CEF	C	slow-regular	0.954	0.093	0.064
62	15	set3	CEF	C	random	0.984	0.046	0.04
62	14	set3	CAR	A	random	0.896	0.062	0.043
62	1	set3	CAR	A	mono	0.885	0.081	0.048
62	2	set3	DOR	B	mono	0.957	0.105	0.06
62	3	set3	CEF	C	mono	0.93	0.045	0.027
63	14	set3	CEF	C	random	0.917	0.044	0.031
63	5	set3	CEF	C	fast-regular	0.905	0.023	0.018
63	6	set3	CEF	C	fast-regular	0.888	0.03	0.022
63	7	set3	DOR	B	fast-regular	0.896	0.045	0.031
63	11	set3	CEF	C	random	0.924	0.067	0.059
63	12	set3	CEF	C	random	0.94	0.078	0.058
63	13	set3	CEF	C	random	0.891	0.046	0.032
63	16	set3	CAR	A	random	0.958	0.062	0.041
63	8	set3	CAR	A	slow-regular	0.854	0.061	0.036
63	9	set3	DOR	B	slow-regular	0.977	0.121	0.069
63	10	set3	CEF	C	slow-regular	0.914	0.046	0.032
63	15	set3	CEF	C	random	0.965	0.078	0.068
63	1	set3	CAR	A	mono	0.89	0.078	0.046
63	2	set3	DOR	B	mono	0.922	0.086	0.048
63	3	set3	CEF	C	mono	0.909	0.055	0.033
64	14	set3	CEF	C	random	0.952	0.09	0.062
64	15	set3	CAR	A	random	1.014	0.075	0.066
64	5	set3	CAR	A	fast-regular	0.886	0.091	0.073
64	6	set3	DOR	B	fast-regular	0.961	0.12	0.089
64	7	set3	CEF	C	fast-regular	0.944	0.063	0.043
64	11	set3	CEF	C	random	0.939	0.079	0.069
64	12	set3	CEF	C	random	0.986	0.07	0.052
64	13	set3	CEF	C	random	0.912	0.04	0.028
64	16	set3	CAR	A	random	0.953	0.075	0.049
64	8	set3	CAR	A	slow-regular	0.899	0.092	0.054
64	9	set3	DOR	B	slow-regular	0.978	0.099	0.056
64	10	set3	CEF	C	slow-regular	0.95	0.034	0.023
64	1	set3	CAR	A	mono	0.919	0.078	0.046
64	2	set3	DOR	B	mono	0.937	0.048	0.027
64	3	set3	CEF	C	mono	0.918	0.048	0.029
65	8	set3	DOR	B	slow-regular	0.811	0.115	0.068
65	9	set3	CAR	A	slow-regular	0.965	0.075	0.043
65	10	set3	CAR	A	slow-regular	0.909	0.051	0.035
65	14	set3	DOR	B	random	0.879	0.076	0.052
65	15	set3	DOR	B	random	0.946	0.119	0.104
65	5	set3	DOR	B	fast-regular	0.873	0.099	0.079
65	6	set3	CAR	A	fast-regular	0.916	0.067	0.049
65	7	set3	CAR	A	fast-regular	0.878	0.085	0.059
65	11	set3	DOR	B	random	0.852	0.193	0.169
65	12	set3	CEF	C	random	0.927	0.018	0.014
65	13	set3	CEF	C	random	0.907	0.056	0.039
65	16	set3	CAR	A	random	0.936	0.066	0.043
65	1	set3	CAR	A	mono	0.865	0.069	0.041
65	2	set3	DOR	B	mono	0.902	0.062	0.035
65	3	set3	CEF	C	mono	0.917	0.084	0.05
66	11	set3	CAR	A	random	0.881	0.057	0.05
66	13	set3	DOR	B	random	0.88	0.06	0.042
66	15	set3	CAR	A	random	0.927	0.068	0.059
66	5	set3	CEF	C	fast-regular	0.925	0.026	0.021
66	6	set3	CEF	C	fast-regular	0.905	0.057	0.042
66	7	set3	DOR	B	fast-regular	0.91	0.084	0.058
66	8	set3	DOR	B	slow-regular	0.867	0.137	0.081
66	9	set3	CAR	A	slow-regular	0.888	0.087	0.049
66	10	set3	CAR	A	slow-regular	0.864	0.06	0.042
66	12	set3	DOR	B	random	0.897	0.062	0.046
66	16	set3	CEF	C	random	0.985	0.093	0.061
66	14	set3	CAR	A	random	0.856	0.033	0.023
66	1	set3	CAR	A	mono	0.861	0.086	0.051
66	2	set3	DOR	B	mono	0.852	0.061	0.035
66	3	set3	CEF	C	mono	0.901	0.081	0.048
67	16	set3	DOR	B	random	1.005	0.106	0.069
67	13	set3	CAR	A	random	0.91	0.098	0.068
67	5	set3	CAR	A	fast-regular	0.93	0.079	0.063
67	6	set3	DOR	B	fast-regular	0.956	0.064	0.047
67	7	set3	CEF	C	fast-regular	0.966	0.035	0.025
67	8	set3	DOR	B	slow-regular	0.996	0.094	0.056
67	9	set3	CAR	A	slow-regular	0.898	0.098	0.055
67	10	set3	CAR	A	slow-regular	0.9	0.06	0.042
67	11	set3	CEF	C	random	0.951	0.059	0.052
67	12	set3	DOR	B	random	1.003	0.082	0.061
67	15	set3	CEF	C	random	0.991	0.065	0.057
67	14	set3	CAR	A	random	0.936	0.088	0.061
67	1	set3	CAR	A	mono	0.903	0.079	0.047
67	2	set3	DOR	B	mono	0.934	0.049	0.028
67	3	set3	CEF	C	mono	0.945	0.065	0.039
68	5	set3	DOR	B	fast-regular	0.95	0.052	0.041
68	6	set3	CAR	A	fast-regular	0.967	0.063	0.047
68	7	set3	CAR	A	fast-regular	0.917	0.092	0.064
68	16	set3	CEF	C	random	1.047	0.073	0.048
68	8	set3	DOR	B	slow-regular	0.992	0.046	0.027
68	9	set3	CAR	A	slow-regular	0.963	0.073	0.041
68	10	set3	CAR	A	slow-regular	0.908	0.079	0.055
68	11	set3	DOR	B	random	0.884	0.14	0.122
68	12	set3	CEF	C	random	0.967	0.026	0.019
68	13	set3	CEF	C	random	0.932	0.051	0.035
68	15	set3	CEF	C	random	1.091	0.078	0.069
68	14	set3	CAR	A	random	0.912	0.048	0.033
68	1	set3	CAR	A	mono	0.926	0.084	0.05
68	2	set3	DOR	B	mono	0.998	0.096	0.054
68	3	set3	CEF	C	mono	0.949	0.069	0.04
69	8	set3	CEF	C	slow-regular	0.97	0.071	0.042
69	9	set3	CEF	C	slow-regular	0.963	0.082	0.047
69	10	set3	DOR	B	slow-regular	0.881	0.096	0.067
69	12	set3	CAR	A	random	0.939	0.066	0.049
69	11	set3	CAR	A	random	0.926	0.102	0.089
69	14	set3	DOR	B	random	0.841	0.136	0.094
69	5	set3	CEF	C	fast-regular	0.956	0.049	0.039
69	6	set3	CEF	C	fast-regular	0.943	0.058	0.043
69	7	set3	DOR	B	fast-regular	0.924	0.045	0.031
69	16	set3	CAR	A	random	0.959	0.08	0.052
69	13	set3	CEF	C	random	0.943	0.086	0.06
69	15	set3	CEF	C	random	0.988	0.045	0.039
69	1	set3	CAR	A	mono	0.903	0.084	0.05
69	2	set3	DOR	B	mono	0.94	0.083	0.047
69	3	set3	CEF	C	mono	0.929	0.07	0.041
70	8	set3	CEF	C	slow-regular	0.974	0.079	0.047
70	9	set3	CEF	C	slow-regular	1.007	0.097	0.055
70	10	set3	DOR	B	slow-regular	1.049	0.092	0.064
70	12	set3	CAR	A	random	0.872	0.079	0.059
70	15	set3	DOR	B	random	1.013	0.139	0.122
70	16	set3	DOR	B	random	0.998	0.113	0.074
70	13	set3	CAR	A	random	0.917	0.053	0.037
70	14	set3	DOR	B	random	0.898	0.112	0.078
70	5	set3	CAR	A	fast-regular	0.934	0.08	0.064
70	6	set3	DOR	B	fast-regular	0.957	0.117	0.087
70	7	set3	CEF	C	fast-regular	0.962	0.027	0.019
70	11	set3	CEF	C	random	0.938	0.063	0.055
70	1	set3	CAR	A	mono	0.946	0.076	0.045
70	2	set3	DOR	B	mono	0.995	0.104	0.059
70	3	set3	CEF	C	mono	0.961	0.075	0.044
71	14	set3	CEF	C	random	0.918	0.075	0.052
71	8	set3	CEF	C	slow-regular	0.883	0.077	0.045
71	9	set3	CEF	C	slow-regular	0.911	0.074	0.042
71	10	set3	DOR	B	slow-regular	0.951	0.07	0.049
71	15	set3	DOR	B	random	0.946	0.099	0.086
71	16	set3	DOR	B	random	0.946	0.112	0.073
71	5	set3	DOR	B	fast-regular	0.905	0.066	0.053
71	6	set3	CAR	A	fast-regular	0.897	0.095	0.071
71	7	set3	CAR	A	fast-regular	0.881	0.062	0.043
71	13	set3	CAR	A	random	0.811	0.09	0.062
71	11	set3	DOR	B	random	0.879	0.122	0.107
71	12	set3	CEF	C	random	0.856	0.069	0.051
71	1	set3	CAR	A	mono	0.867	0.068	0.04
71	2	set3	DOR	B	mono	0.896	0.086	0.049
71	3	set3	CEF	C	mono	0.879	0.069	0.041
72	13	set3	DOR	B	random	0.892	0.078	0.054
72	15	set3	CAR	A	random	0.969	0.055	0.048
72	11	set3	CAR	A	random	0.922	0.106	0.093
72	12	set3	CAR	A	random	0.943	0.142	0.105
72	5	set3	CEF	C	fast-regular	0.949	0.034	0.028
72	6	set3	CEF	C	fast-regular	0.974	0.073	0.054
72	7	set3	DOR	B	fast-regular	0.978	0.081	0.056
72	8	set3	CEF	C	slow-regular	0.96	0.071	0.042
72	9	set3	CEF	C	slow-regular	1.028	0.078	0.044
72	10	set3	DOR	B	slow-regular	1.004	0.077	0.054
72	14	set3	DOR	B	random	0.931	0.094	0.065
72	16	set3	CEF	C	random	1.02	0.079	0.052
72	1	set3	CAR	A	mono	0.929	0.075	0.044
72	2	set3	DOR	B	mono	0.955	0.077	0.044
72	3	set3	CEF	C	mono	0.933	0.07	0.042
73	15	set3	CAR	A	random	0.935	0.098	0.086
73	11	set3	CAR	A	random	0.904	0.105	0.092
73	12	set3	CAR	A	random	0.924	0.144	0.107
73	5	set3	CAR	A	fast-regular	0.895	0.108	0.086
73	6	set3	DOR	B	fast-regular	0.934	0.097	0.072
73	7	set3	CEF	C	fast-regular	0.95	0.093	0.064
73	8	set3	CAR	A	slow-regular	0.932	0.097	0.057
73	9	set3	DOR	B	slow-regular	0.898	0.1	0.056
73	10	set3	CEF	C	slow-regular	0.961	0.077	0.053
73	14	set3	DOR	B	random	0.963	0.102	0.071
73	16	set3	CEF	C	random	1.004	0.073	0.048
73	13	set3	CEF	C	random	0.942	0.073	0.051
73	1	set3	CAR	A	mono	0.925	0.079	0.047
73	2	set3	DOR	B	mono	0.925	0.124	0.07
73	3	set3	CEF	C	mono	0.931	0.074	0.044
74	14	set3	CEF	C	random	0.949	0.031	0.021
74	13	set3	DOR	B	random	0.947	0.02	0.014
74	15	set3	DOR	B	random	0.923	0.128	0.112
74	5	set3	DOR	B	fast-regular	0.962	0.033	0.027
74	6	set3	CAR	A	fast-regular	0.941	0.039	0.029
74	7	set3	CAR	A	fast-regular	0.877	0.066	0.046
74	11	set3	CEF	C	random	0.903	0.066	0.058
74	12	set3	CAR	A	random	0.911	0.114	0.084
74	8	set3	CAR	A	slow-regular	0.897	0.095	0.056
74	9	set3	DOR	B	slow-regular	0.938	0.109	0.062
74	10	set3	CEF	C	slow-regular	0.96	0.044	0.031
74	16	set3	CEF	C	random	0.979	0.075	0.049
74	1	set3	CAR	A	mono	0.897	0.067	0.04
74	2	set3	DOR	B	mono	0.938	0.056	0.031
74	3	set3	CEF	C	mono	0.933	0.074	0.043
75	15	set3	CAR	A	random	0.969	0.067	0.058
75	5	set3	CEF	C	fast-regular	0.988	0.071	0.056
75	6	set3	CEF	C	fast-regular	0.98	0.108	0.08
75	7	set3	DOR	B	fast-regular	0.992	0.092	0.063
75	11	set3	DOR	B	random	0.927	0.088	0.077
75	16	set3	CAR	A	random	0.97	0.072	0.047
75	8	set3	CAR	A	slow-regular	0.915	0.073	0.043
75	9	set3	DOR	B	slow-regular	0.964	0.098	0.055
75	10	set3	CEF	C	slow-regular	0.997	0.064	0.045
75	12	set3	CEF	C	random	0.972	0.071	0.053
75	13	set3	CEF	C	random	0.958	0.055	0.038
75	14	set3	CAR	A	random	0.936	0.071	0.049
75	1	set3	CAR	A	mono	0.914	0.069	0.041
75	2	set3	DOR	B	mono	0.969	0.077	0.044
75	3	set3	CEF	C	mono	0.962	0.07	0.042
76	12	set3	DOR	B	random	1	0.076	0.056
76	13	set3	DOR	B	random	0.945	0.03	0.021
76	16	set3	DOR	B	random	0.973	0.099	0.064
76	11	set3	CAR	A	random	0.913	0.076	0.067
76	15	set3	DOR	B	random	0.926	0.075	0.066
76	5	set3	CAR	A	fast-regular	0.904	0.091	0.073
76	6	set3	DOR	B	fast-regular	0.941	0.078	0.058
76	7	set3	CEF	C	fast-regular	0.937	0.066	0.046
76	14	set3	DOR	B	random	0.953	0.087	0.06
76	8	set3	CAR	A	slow-regular	0.889	0.081	0.048
76	9	set3	DOR	B	slow-regular	0.974	0.056	0.031
76	10	set3	CEF	C	slow-regular	1.001	0.055	0.038
76	1	set3	CAR	A	mono	0.917	0.089	0.052
76	2	set3	DOR	B	mono	0.976	0.069	0.039
76	3	set3	CEF	C	mono	0.963	0.088	0.052
77	14	set3	CEF	C	random	0.918	0.034	0.023
77	8	set3	DOR	B	slow-regular	0.878	0.071	0.042
77	9	set3	CAR	A	slow-regular	0.935	0.046	0.026
77	10	set3	CAR	A	slow-regular	0.905	0.038	0.026
77	13	set3	CAR	A	random	0.861	0.06	0.041
77	5	set3	DOR	B	fast-regular	0.934	0.081	0.065
77	6	set3	CAR	A	fast-regular	0.913	0.036	0.026
77	7	set3	CAR	A	fast-regular	0.878	0.084	0.058
77	11	set3	CEF	C	random	0.907	0.05	0.044
77	16	set3	CEF	C	random	0.989	0.059	0.038
77	12	set3	CEF	C	random	0.941	0.076	0.056
77	15	set3	CEF	C	random	1.056	0.066	0.058
77	1	set3	CAR	A	mono	0.877	0.091	0.054
77	2	set3	DOR	B	mono	0.944	0.08	0.046
77	3	set3	CEF	C	mono	0.945	0.068	0.04
78	14	set3	CEF	C	random	0.954	0.057	0.039
78	12	set3	DOR	B	random	1.048	0.106	0.079
78	13	set3	DOR	B	random	0.91	0.074	0.051
78	15	set3	CAR	A	random	1.01	0.038	0.034
78	16	set3	DOR	B	random	1.064	0.1	0.065
78	5	set3	CEF	C	fast-regular	0.954	0.037	0.029
78	6	set3	CEF	C	fast-regular	0.918	0.056	0.042
78	7	set3	DOR	B	fast-regular	0.955	0.034	0.024
78	8	set3	DOR	B	slow-regular	0.965	0.069	0.041
78	9	set3	CAR	A	slow-regular	0.937	0.095	0.054
78	10	set3	CAR	A	slow-regular	0.882	0.139	0.097
78	11	set3	CAR	A	random	0.907	0.081	0.071
78	1	set3	CAR	A	mono	0.914	0.055	0.033
78	2	set3	DOR	B	mono	0.94	0.036	0.02
78	3	set3	CEF	C	mono	0.987	0.062	0.037
79	14	set3	CEF	C	random	0.94	0.077	0.053
79	12	set3	CAR	A	random	0.95	0.07	0.052
79	15	set3	DOR	B	random	0.976	0.134	0.117
79	5	set3	CAR	A	fast-regular	0.905	0.074	0.06
79	6	set3	DOR	B	fast-regular	0.927	0.078	0.058
79	7	set3	CEF	C	fast-regular	0.919	0.045	0.031
79	8	set3	DOR	B	slow-regular	0.939	0.036	0.021
79	9	set3	CAR	A	slow-regular	0.938	0.057	0.032
79	10	set3	CAR	A	slow-regular	0.864	0.091	0.063
79	11	set3	CEF	C	random	0.934	0.064	0.056
79	16	set3	CEF	C	random	1.017	0.074	0.048
79	13	set3	CEF	C	random	0.944	0.064	0.044
79	1	set3	CAR	A	mono	0.913	0.082	0.048
79	2	set3	DOR	B	mono	0.972	0.071	0.04
79	3	set3	CEF	C	mono	0.937	0.077	0.046
80	12	set3	DOR	B	random	1.029	0.123	0.091
80	13	set3	DOR	B	random	0.973	0.036	0.025
80	14	set3	CEF	C	random	0.96	0.071	0.049
80	5	set3	DOR	B	fast-regular	0.964	0.047	0.037
80	6	set3	CAR	A	fast-regular	0.99	0.056	0.041
80	7	set3	CAR	A	fast-regular	0.942	0.083	0.057
80	11	set3	DOR	B	random	0.97	0.078	0.069
80	15	set3	DOR	B	random	1.105	0.079	0.069
80	16	set3	CAR	A	random	1.018	0.062	0.04
80	8	set3	DOR	B	slow-regular	1.004	0.07	0.041
80	9	set3	CAR	A	slow-regular	0.955	0.085	0.048
80	10	set3	CAR	A	slow-regular	0.908	0.083	0.057
80	1	set3	CAR	A	mono	0.942	0.065	0.038
80	2	set3	DOR	B	mono	0.961	0.028	0.016
80	3	set3	CEF	C	mono	1.004	0.057	0.033
81	8	set3	CEF	C	slow-regular	0.982	0.052	0.031
81	9	set3	CEF	C	slow-regular	0.944	0.071	0.04
81	10	set3	DOR	B	slow-regular	0.877	0.086	0.06
81	15	set3	CAR	A	random	1.003	0.051	0.045
81	16	set3	DOR	B	random	1.007	0.081	0.053
81	5	set3	CEF	C	fast-regular	0.959	0.031	0.025
81	6	set3	CEF	C	fast-regular	0.946	0.04	0.03
81	7	set3	DOR	B	fast-regular	0.968	0.085	0.059
81	12	set3	CAR	A	random	0.947	0.056	0.042
81	14	set3	DOR	B	random	0.957	0.053	0.037
81	11	set3	CEF	C	random	0.98	0.038	0.034
81	13	set3	CEF	C	random	0.946	0.043	0.029
81	1	set3	CAR	A	mono	0.924	0.065	0.039
81	2	set3	DOR	B	mono	0.982	0.09	0.051
81	3	set3	CEF	C	mono	0.961	0.067	0.039
82	8	set3	CEF	C	slow-regular	0.965	0.067	0.04
82	9	set3	CEF	C	slow-regular	0.96	0.077	0.043
82	10	set3	DOR	B	slow-regular	0.99	0.084	0.058
82	13	set3	CAR	A	random	0.877	0.07	0.049
82	11	set3	CAR	A	random	0.908	0.099	0.087
82	15	set3	CAR	A	random	0.938	0.068	0.059
82	5	set3	CAR	A	fast-regular	0.882	0.079	0.064
82	6	set3	DOR	B	fast-regular	0.939	0.112	0.083
82	7	set3	CEF	C	fast-regular	0.956	0.051	0.035
82	12	set3	CAR	A	random	0.99	0.151	0.112
82	14	set3	DOR	B	random	0.97	0.075	0.052
82	16	set3	CAR	A	random	0.973	0.105	0.068
82	1	set3	CAR	A	mono	0.906	0.072	0.042
82	2	set3	DOR	B	mono	0.96	0.094	0.053
82	3	set3	CEF	C	mono	0.946	0.041	0.024
83	8	set3	CEF	C	slow-regular	0.997	0.076	0.045
83	9	set3	CEF	C	slow-regular	1.064	0.106	0.06
83	10	set3	DOR	B	slow-regular	0.978	0.036	0.025
83	13	set3	CAR	A	random	0.876	0.076	0.053
83	16	set3	DOR	B	random	1.043	0.072	0.047
83	5	set3	DOR	B	fast-regular	0.98	0.05	0.04
83	6	set3	CAR	A	fast-regular	0.969	0.062	0.046
83	7	set3	CAR	A	fast-regular	0.925	0.09	0.062
83	11	set3	CAR	A	random	0.91	0.104	0.091
83	15	set3	CAR	A	random	0.915	0.055	0.048
83	12	set3	CEF	C	random	0.984	0.098	0.072
83	14	set3	CAR	A	random	0.941	0.055	0.038
83	1	set3	CAR	A	mono	0.919	0.092	0.054
83	2	set3	DOR	B	mono	0.999	0.086	0.049
83	3	set3	CEF	C	mono	0.974	0.123	0.073
84	13	set3	DOR	B	random	0.842	0.123	0.085
84	5	set3	CEF	C	fast-regular	0.928	0.062	0.05
84	6	set3	CEF	C	fast-regular	0.919	0.088	0.065
84	7	set3	DOR	B	fast-regular	0.955	0.07	0.048
84	8	set3	CEF	C	slow-regular	0.943	0.074	0.044
84	9	set3	CEF	C	slow-regular	0.994	0.069	0.039
84	10	set3	DOR	B	slow-regular	0.996	0.053	0.037
84	15	set3	DOR	B	random	0.928	0.134	0.118
84	11	set3	CAR	A	random	0.914	0.145	0.127
84	12	set3	CAR	A	random	0.922	0.073	0.054
84	16	set3	CEF	C	random	0.993	0.072	0.047
84	14	set3	CAR	A	random	0.91	0.073	0.051
84	1	set3	CAR	A	mono	0.874	0.085	0.05
84	2	set3	DOR	B	mono	0.951	0.104	0.059
84	3	set3	CEF	C	mono	0.995	0.145	0.086
85	12	set3	DOR	B	random	0.955	0.067	0.05
85	14	set3	CEF	C	random	0.935	0.063	0.044
85	13	set3	CAR	A	random	0.904	0.049	0.034
85	5	set3	CAR	A	fast-regular	0.892	0.076	0.061
85	6	set3	DOR	B	fast-regular	0.928	0.147	0.109
85	7	set3	CEF	C	fast-regular	0.939	0.061	0.042
85	8	set3	CAR	A	slow-regular	0.897	0.061	0.036
85	9	set3	DOR	B	slow-regular	0.965	0.119	0.067
85	10	set3	CEF	C	slow-regular	0.929	0.06	0.041
85	15	set3	DOR	B	random	1	0.078	0.068
85	11	set3	CAR	A	random	0.874	0.08	0.07
85	16	set3	CEF	C	random	1.012	0.073	0.048
85	1	set3	CAR	A	mono	0.899	0.052	0.031
85	2	set3	DOR	B	mono	0.933	0.092	0.052
85	3	set3	CEF	C	mono	0.938	0.067	0.039
86	11	set3	DOR	B	random	0.884	0.122	0.107
86	12	set3	DOR	B	random	0.953	0.035	0.026
86	13	set3	DOR	B	random	0.875	0.044	0.03
86	5	set3	DOR	B	fast-regular	0.964	0.076	0.061
86	6	set3	CAR	A	fast-regular	0.939	0.045	0.033
86	7	set3	CAR	A	fast-regular	0.894	0.086	0.06
86	14	set3	DOR	B	random	0.966	0.041	0.029
86	15	set3	CEF	C	random	0.997	0.081	0.071
86	8	set3	CAR	A	slow-regular	0.881	0.07	0.042
86	9	set3	DOR	B	slow-regular	0.96	0.084	0.048
86	10	set3	CEF	C	slow-regular	0.924	0.027	0.019
86	16	set3	CEF	C	random	1.049	0.103	0.067
86	1	set3	CAR	A	mono	0.918	0.086	0.051
86	2	set3	DOR	B	mono	0.965	0.086	0.049
86	3	set3	CEF	C	mono	0.968	0.07	0.042
87	14	set3	CEF	C	random	0.956	0.038	0.026
87	16	set3	DOR	B	random	1.051	0.117	0.077
87	5	set3	CEF	C	fast-regular	0.944	0.087	0.069
87	6	set3	CEF	C	fast-regular	0.915	0.053	0.04
87	7	set3	DOR	B	fast-regular	0.897	0.063	0.044
87	13	set3	DOR	B	random	0.936	0.032	0.022
87	15	set3	CAR	A	random	0.984	0.075	0.066
87	12	set3	CEF	C	random	0.938	0.038	0.028
87	8	set3	CAR	A	slow-regular	0.851	0.083	0.049
87	9	set3	DOR	B	slow-regular	0.944	0.097	0.055
87	10	set3	CEF	C	slow-regular	0.959	0.094	0.065
87	11	set3	CAR	A	random	0.874	0.087	0.076
87	1	set3	CAR	A	mono	0.906	0.068	0.04
87	2	set3	DOR	B	mono	0.93	0.079	0.045
87	3	set3	CEF	C	mono	1.003	0.118	0.07
88	11	set3	CEF	C	random	0.924	0.113	0.099
88	16	set3	CAR	A	random	0.981	0.072	0.047
88	5	set3	CAR	A	fast-regular	0.886	0.071	0.056
88	6	set3	DOR	B	fast-regular	0.898	0.126	0.094
88	7	set3	CEF	C	fast-regular	0.88	0.04	0.028
88	12	set3	CAR	A	random	0.85	0.038	0.028
88	14	set3	DOR	B	random	0.945	0.073	0.051
88	15	set3	CAR	A	random	0.874	0.061	0.053
88	13	set3	CEF	C	random	0.901	0.059	0.041
88	8	set3	CAR	A	slow-regular	0.854	0.081	0.048
88	9	set3	DOR	B	slow-regular	0.953	0.077	0.044
88	10	set3	CEF	C	slow-regular	0.96	0.077	0.053
88	1	set3	CAR	A	mono	0.897	0.065	0.039
88	2	set3	DOR	B	mono	0.913	0.072	0.041
88	3	set3	CEF	C	mono	0.939	0.047	0.028
89	8	set3	DOR	B	slow-regular	0.894	0.058	0.034
89	9	set3	CAR	A	slow-regular	0.971	0.047	0.026
89	10	set3	CAR	A	slow-regular	0.92	0.029	0.02
89	11	set3	DOR	B	random	0.95	0.052	0.046
89	14	set3	CEF	C	random	0.945	0.051	0.035
89	5	set3	DOR	B	fast-regular	0.951	0.047	0.038
89	6	set3	CAR	A	fast-regular	0.943	0.058	0.043
89	7	set3	CAR	A	fast-regular	0.886	0.058	0.04
89	15	set3	CEF	C	random	0.985	0.069	0.061
89	12	set3	CAR	A	random	0.866	0.058	0.043
89	13	set3	CEF	C	random	0.945	0.072	0.05
89	16	set3	CEF	C	random	0.997	0.082	0.053
89	1	set3	CAR	A	mono	0.921	0.07	0.041
89	2	set3	DOR	B	mono	0.969	0.082	0.047
89	3	set3	CEF	C	mono	0.947	0.037	0.022
90	13	set3	CAR	A	random	0.886	0.092	0.064
90	16	set3	DOR	B	random	1.059	0.092	0.06
90	5	set3	CEF	C	fast-regular	0.943	0.073	0.058
90	6	set3	CEF	C	fast-regular	0.927	0.064	0.047
90	7	set3	DOR	B	fast-regular	0.949	0.065	0.045
90	8	set3	DOR	B	slow-regular	0.975	0.093	0.055
90	9	set3	CAR	A	slow-regular	0.946	0.091	0.051
90	10	set3	CAR	A	slow-regular	0.884	0.149	0.103
90	11	set3	DOR	B	random	0.962	0.13	0.114
90	15	set3	DOR	B	random	1.027	0.115	0.101
90	12	set3	CEF	C	random	0.976	0.153	0.113
90	14	set3	CAR	A	random	0.88	0.104	0.072
90	1	set3	CAR	A	mono	0.904	0.078	0.046
90	2	set3	DOR	B	mono	0.961	0.079	0.045
90	3	set3	CEF	C	mono	0.972	0.073	0.043
91	12	set3	DOR	B	random	0.985	0.124	0.092
91	11	set3	CEF	C	random	0.979	0.089	0.078
91	13	set3	CAR	A	random	0.884	0.1	0.069
91	14	set3	CEF	C	random	0.935	0.124	0.086
91	16	set3	CAR	A	random	0.999	0.079	0.051
91	5	set3	CAR	A	fast-regular	0.934	0.113	0.09
91	6	set3	DOR	B	fast-regular	0.95	0.131	0.097
91	7	set3	CEF	C	fast-regular	0.993	0.066	0.046
91	8	set3	DOR	B	slow-regular	0.988	0.097	0.057
91	9	set3	CAR	A	slow-regular	0.933	0.049	0.028
91	10	set3	CAR	A	slow-regular	0.886	0.137	0.095
91	15	set3	CEF	C	random	0.994	0.093	0.082
91	1	set3	CAR	A	mono	0.923	0.075	0.045
91	2	set3	DOR	B	mono	0.956	0.09	0.051
91	3	set3	CEF	C	mono	0.997	0.088	0.052
92	13	set3	DOR	B	random	0.928	0.081	0.056
92	5	set3	DOR	B	fast-regular	0.938	0.043	0.035
92	6	set3	CAR	A	fast-regular	0.907	0.064	0.048
92	7	set3	CAR	A	fast-regular	0.899	0.073	0.051
92	11	set3	CEF	C	random	0.934	0.055	0.048
92	14	set3	DOR	B	random	0.994	0.104	0.072
92	15	set3	CAR	A	random	0.99	0.072	0.063
92	16	set3	CAR	A	random	1.012	0.092	0.06
92	8	set3	DOR	B	slow-regular	0.975	0.057	0.034
92	9	set3	CAR	A	slow-regular	0.939	0.072	0.041
92	10	set3	CAR	A	slow-regular	0.885	0.11	0.076
92	12	set3	CEF	C	random	1.002	0.092	0.068
92	1	set3	CAR	A	mono	0.898	0.073	0.043
92	2	set3	DOR	B	mono	0.983	0.085	0.048
92	3	set3	CEF	C	mono	0.965	0.079	0.047
93	8	set3	CEF	C	slow-regular	0.971	0.043	0.025
93	9	set3	CEF	C	slow-regular	0.965	0.081	0.046
93	10	set3	DOR	B	slow-regular	0.881	0.084	0.058
93	12	set3	DOR	B	random	0.966	0.052	0.039
93	16	set3	DOR	B	random	1.038	0.095	0.062
93	5	set3	CEF	C	fast-regular	0.948	0.035	0.028
93	6	set3	CEF	C	fast-regular	0.966	0.104	0.077
93	7	set3	DOR	B	fast-regular	0.954	0.108	0.075
93	13	set3	DOR	B	random	0.952	0.045	0.031
93	15	set3	DOR	B	random	1.082	0.074	0.065
93	11	set3	CAR	A	random	0.897	0.078	0.068
93	14	set3	DOR	B	random	0.986	0.056	0.038
93	1	set3	CAR	A	mono	0.904	0.065	0.038
93	2	set3	DOR	B	mono	0.995	0.104	0.059
93	3	set3	CEF	C	mono	0.98	0.06	0.036
94	8	set3	CEF	C	slow-regular	0.999	0.111	0.066
94	9	set3	CEF	C	slow-regular	1.072	0.05	0.028
94	10	set3	DOR	B	slow-regular	0.966	0.044	0.031
94	12	set3	DOR	B	random	1.007	0.092	0.068
94	14	set3	CEF	C	random	0.963	0.04	0.028
94	5	set3	CAR	A	fast-regular	0.893	0.095	0.076
94	6	set3	DOR	B	fast-regular	0.973	0.068	0.051
94	7	set3	CEF	C	fast-regular	0.937	0.033	0.023
94	11	set3	CEF	C	random	0.967	0.088	0.078
94	13	set3	DOR	B	random	1.012	0.064	0.044
94	15	set3	CAR	A	random	1.048	0.091	0.08
94	16	set3	CAR	A	random	1.001	0.078	0.051
94	1	set3	CAR	A	mono	0.923	0.083	0.049
94	2	set3	DOR	B	mono	0.971	0.063	0.036
94	3	set3	CEF	C	mono	0.96	0.073	0.043
95	8	set3	CEF	C	slow-regular	0.983	0.139	0.082
95	9	set3	CEF	C	slow-regular	1.021	0.059	0.033
95	10	set3	DOR	B	slow-regular	0.995	0.062	0.043
95	11	set3	DOR	B	random	0.95	0.069	0.06
95	13	set3	CAR	A	random	0.926	0.065	0.045
95	16	set3	DOR	B	random	0.995	0.111	0.073
95	5	set3	DOR	B	fast-regular	0.962	0.034	0.027
95	6	set3	CAR	A	fast-regular	0.968	0.04	0.029
95	7	set3	CAR	A	fast-regular	0.882	0.041	0.028
95	12	set3	DOR	B	random	1.007	0.096	0.071
95	14	set3	CAR	A	random	0.916	0.096	0.066
95	15	set3	CEF	C	random	1.052	0.058	0.051
95	1	set3	CAR	A	mono	0.916	0.068	0.04
95	2	set3	DOR	B	mono	0.955	0.041	0.023
95	3	set3	CEF	C	mono	0.987	0.069	0.041
96	5	set3	CEF	C	fast-regular	0.976	0.07	0.056
96	6	set3	CEF	C	fast-regular	0.947	0.074	0.055
96	7	set3	DOR	B	fast-regular	0.952	0.092	0.064
96	8	set3	CEF	C	slow-regular	0.953	0.141	0.083
96	9	set3	CEF	C	slow-regular	1.015	0.096	0.054
96	10	set3	DOR	B	slow-regular	1.028	0.086	0.06
96	11	set3	DOR	B	random	0.93	0.066	0.058
96	12	set3	CAR	A	random	0.975	0.079	0.059
96	13	set3	CAR	A	random	0.851	0.083	0.058
96	14	set3	CEF	C	random	0.967	0.092	0.064
96	15	set3	DOR	B	random	1.117	0.058	0.051
96	16	set3	DOR	B	random	1.085	0.084	0.055
96	1	set3	CAR	A	mono	0.928	0.071	0.042
96	2	set3	DOR	B	mono	0.965	0.08	0.045
96	3	set3	CEF	C	mono	0.967	0.049	0.029

## Sheet: Fig_2BC
population	isolate	cluster	ab	season	evoexp_plate	evoexp_well	evoexp_ID	treatment	od_total	od_total_anc	rel_od_total
12-3a-A1	12-3a-A1-1	1	CIP	12	3a	A1	10	slow-regular	0.809	0.619	0.307
12-3a-A1	12-3a-A1-1	1	DOR	12	3a	A1	10	slow-regular	0.863	0.918	-0.06
12-3a-A1	12-3a-A1-1	1	GEN	12	3a	A1	10	slow-regular	0.692	0.816	-0.152
12-3a-A1	12-3a-A1-1	1	CAR	12	3a	A1	10	slow-regular	0.961	0.56	0.716
12-3a-A1	12-3a-A1-1	1	CEF	12	3a	A1	10	slow-regular	0.757	0.536	0.412
12-3a-A1	12-3a-A1-10	1	DOR	12	3a	A1	10	slow-regular	0.792	0.918	-0.137
12-3a-A1	12-3a-A1-10	1	CEF	12	3a	A1	10	slow-regular	0.732	0.536	0.366
12-3a-A1	12-3a-A1-10	1	GEN	12	3a	A1	10	slow-regular	0.693	0.816	-0.151
12-3a-A1	12-3a-A1-10	1	CIP	12	3a	A1	10	slow-regular	0.86	0.619	0.389
12-3a-A1	12-3a-A1-10	1	CAR	12	3a	A1	10	slow-regular	0.992	0.56	0.771
12-3a-A1	12-3a-A1-11	1	GEN	12	3a	A1	10	slow-regular	0.738	0.852	-0.134
12-3a-A1	12-3a-A1-11	1	CEF	12	3a	A1	10	slow-regular	0.728	0.518	0.405
12-3a-A1	12-3a-A1-11	1	CIP	12	3a	A1	10	slow-regular	0.807	0.731	0.104
12-3a-A1	12-3a-A1-11	1	CAR	12	3a	A1	10	slow-regular	0.975	0.616	0.583
12-3a-A1	12-3a-A1-11	1	DOR	12	3a	A1	10	slow-regular	0.874	0.854	0.023
12-3a-A1	12-3a-A1-12	1	DOR	12	3a	A1	10	slow-regular	0.817	0.854	-0.043
12-3a-A1	12-3a-A1-12	1	GEN	12	3a	A1	10	slow-regular	0.649	0.852	-0.238
12-3a-A1	12-3a-A1-12	1	CAR	12	3a	A1	10	slow-regular	0.88	0.616	0.429
12-3a-A1	12-3a-A1-12	1	CIP	12	3a	A1	10	slow-regular	0.765	0.731	0.047
12-3a-A1	12-3a-A1-12	1	CEF	12	3a	A1	10	slow-regular	0.652	0.518	0.259
12-3a-A1	12-3a-A1-13	1	CIP	12	3a	A1	10	slow-regular	0.778	0.731	0.064
12-3a-A1	12-3a-A1-13	1	CAR	12	3a	A1	10	slow-regular	0.82	0.616	0.331
12-3a-A1	12-3a-A1-13	1	CEF	12	3a	A1	10	slow-regular	0.666	0.518	0.286
12-3a-A1	12-3a-A1-13	1	GEN	12	3a	A1	10	slow-regular	0.664	0.852	-0.221
12-3a-A1	12-3a-A1-13	1	DOR	12	3a	A1	10	slow-regular	0.935	0.854	0.095
12-3a-A1	12-3a-A1-14	1	CAR	12	3a	A1	10	slow-regular	0.931	0.616	0.511
12-3a-A1	12-3a-A1-14	1	CEF	12	3a	A1	10	slow-regular	0.791	0.518	0.527
12-3a-A1	12-3a-A1-14	1	CIP	12	3a	A1	10	slow-regular	0.747	0.731	0.022
12-3a-A1	12-3a-A1-14	1	GEN	12	3a	A1	10	slow-regular	0.693	0.852	-0.187
12-3a-A1	12-3a-A1-14	1	DOR	12	3a	A1	10	slow-regular	0.882	0.854	0.033
12-3a-A1	12-3a-A1-15	1	CEF	12	3a	A1	10	slow-regular	0.885	0.518	0.708
12-3a-A1	12-3a-A1-15	1	GEN	12	3a	A1	10	slow-regular	0.769	0.852	-0.097
12-3a-A1	12-3a-A1-15	1	CAR	12	3a	A1	10	slow-regular	0.989	0.616	0.606
12-3a-A1	12-3a-A1-15	1	DOR	12	3a	A1	10	slow-regular	0.846	0.854	-0.009
12-3a-A1	12-3a-A1-15	1	CIP	12	3a	A1	10	slow-regular	0.82	0.731	0.122
12-3a-A1	12-3a-A1-16	1	GEN	12	3a	A1	10	slow-regular	0.658	0.852	-0.228
12-3a-A1	12-3a-A1-16	1	CAR	12	3a	A1	10	slow-regular	0.914	0.616	0.484
12-3a-A1	12-3a-A1-16	1	CEF	12	3a	A1	10	slow-regular	0.709	0.518	0.369
12-3a-A1	12-3a-A1-16	1	CIP	12	3a	A1	10	slow-regular	0.74	0.731	0.012
12-3a-A1	12-3a-A1-16	1	DOR	12	3a	A1	10	slow-regular	0.829	0.854	-0.029
12-3a-A1	12-3a-A1-17	2	GEN	12	3a	A1	10	slow-regular	0.826	0.852	-0.031
12-3a-A1	12-3a-A1-17	2	DOR	12	3a	A1	10	slow-regular	1.228	0.854	0.438
12-3a-A1	12-3a-A1-17	2	CIP	12	3a	A1	10	slow-regular	0.79	0.731	0.081
12-3a-A1	12-3a-A1-17	2	CAR	12	3a	A1	10	slow-regular	0.981	0.816	0.202
12-3a-A1	12-3a-A1-17	2	CEF	12	3a	A1	10	slow-regular	0.763	0.518	0.473
12-3a-A1	12-3a-A1-18	1	GEN	12	3a	A1	10	slow-regular	0.694	0.852	-0.185
12-3a-A1	12-3a-A1-18	1	CAR	12	3a	A1	10	slow-regular	1.018	0.616	0.653
12-3a-A1	12-3a-A1-18	1	DOR	12	3a	A1	10	slow-regular	0.98	0.854	0.148
12-3a-A1	12-3a-A1-18	1	CEF	12	3a	A1	10	slow-regular	0.842	0.518	0.625
12-3a-A1	12-3a-A1-18	1	CIP	12	3a	A1	10	slow-regular	0.793	0.731	0.085
12-3a-A1	12-3a-A1-19	1	GEN	12	3a	A1	10	slow-regular	0.664	0.852	-0.221
12-3a-A1	12-3a-A1-19	1	DOR	12	3a	A1	10	slow-regular	0.886	0.854	0.037
12-3a-A1	12-3a-A1-19	1	CEF	12	3a	A1	10	slow-regular	0.735	0.518	0.419
12-3a-A1	12-3a-A1-19	1	CIP	12	3a	A1	10	slow-regular	0.724	0.731	-0.01
12-3a-A1	12-3a-A1-19	1	CAR	12	3a	A1	10	slow-regular	0.918	0.616	0.49
12-3a-A1	12-3a-A1-2	1	CAR	12	3a	A1	10	slow-regular	0.961	0.56	0.716
12-3a-A1	12-3a-A1-2	1	DOR	12	3a	A1	10	slow-regular	0.852	0.918	-0.072
12-3a-A1	12-3a-A1-2	1	CEF	12	3a	A1	10	slow-regular	0.841	0.536	0.569
12-3a-A1	12-3a-A1-2	1	CIP	12	3a	A1	10	slow-regular	0.851	0.619	0.375
12-3a-A1	12-3a-A1-2	1	GEN	12	3a	A1	10	slow-regular	0.668	0.816	-0.181
12-3a-A1	12-3a-A1-20	1	CAR	12	3a	A1	10	slow-regular	0.912	0.616	0.481
12-3a-A1	12-3a-A1-20	1	CIP	12	3a	A1	10	slow-regular	0.774	0.731	0.059
12-3a-A1	12-3a-A1-20	1	CEF	12	3a	A1	10	slow-regular	0.779	0.518	0.504
12-3a-A1	12-3a-A1-20	1	DOR	12	3a	A1	10	slow-regular	0.859	0.854	0.006
12-3a-A1	12-3a-A1-20	1	GEN	12	3a	A1	10	slow-regular	0.669	0.852	-0.215
12-3a-A1	12-3a-A1-3	1	GEN	12	3a	A1	10	slow-regular	0.671	0.816	-0.178
12-3a-A1	12-3a-A1-3	1	DOR	12	3a	A1	10	slow-regular	1.012	0.918	0.102
12-3a-A1	12-3a-A1-3	1	CAR	12	3a	A1	10	slow-regular	0.949	0.56	0.695
12-3a-A1	12-3a-A1-3	1	CEF	12	3a	A1	10	slow-regular	0.808	0.536	0.507
12-3a-A1	12-3a-A1-3	1	CIP	12	3a	A1	10	slow-regular	0.827	0.619	0.336
12-3a-A1	12-3a-A1-4	1	DOR	12	3a	A1	10	slow-regular	0.797	0.918	-0.132
12-3a-A1	12-3a-A1-4	1	CEF	12	3a	A1	10	slow-regular	0.82	0.536	0.53
12-3a-A1	12-3a-A1-4	1	GEN	12	3a	A1	10	slow-regular	0.686	0.816	-0.159
12-3a-A1	12-3a-A1-4	1	CIP	12	3a	A1	10	slow-regular	0.874	0.619	0.412
12-3a-A1	12-3a-A1-4	1	CAR	12	3a	A1	10	slow-regular	0.982	0.56	0.754
12-3a-A1	12-3a-A1-5	1	DOR	12	3a	A1	10	slow-regular	0.95	0.918	0.035
12-3a-A1	12-3a-A1-5	1	CAR	12	3a	A1	10	slow-regular	1.049	0.56	0.873
12-3a-A1	12-3a-A1-5	1	GEN	12	3a	A1	10	slow-regular	0.713	0.816	-0.126
12-3a-A1	12-3a-A1-5	1	CEF	12	3a	A1	10	slow-regular	0.921	0.536	0.718
12-3a-A1	12-3a-A1-5	1	CIP	12	3a	A1	10	slow-regular	0.807	0.619	0.304
12-3a-A1	12-3a-A1-6	1	CIP	12	3a	A1	10	slow-regular	0.773	0.619	0.249
12-3a-A1	12-3a-A1-6	1	DOR	12	3a	A1	10	slow-regular	0.867	0.918	-0.056
12-3a-A1	12-3a-A1-6	1	GEN	12	3a	A1	10	slow-regular	0.689	0.816	-0.156
12-3a-A1	12-3a-A1-6	1	CAR	12	3a	A1	10	slow-regular	0.911	0.56	0.627
12-3a-A1	12-3a-A1-6	1	CEF	12	3a	A1	10	slow-regular	0.821	0.536	0.532
12-3a-A1	12-3a-A1-7	1	CIP	12	3a	A1	10	slow-regular	0.81	0.619	0.309
12-3a-A1	12-3a-A1-7	1	GEN	12	3a	A1	10	slow-regular	0.729	0.816	-0.107
12-3a-A1	12-3a-A1-7	1	DOR	12	3a	A1	10	slow-regular	0.982	0.918	0.07
12-3a-A1	12-3a-A1-7	1	CEF	12	3a	A1	10	slow-regular	0.771	0.536	0.438
12-3a-A1	12-3a-A1-7	1	CAR	12	3a	A1	10	slow-regular	0.977	0.56	0.745
12-3a-A1	12-3a-A1-8	1	GEN	12	3a	A1	10	slow-regular	0.623	0.816	-0.237
12-3a-A1	12-3a-A1-8	1	CEF	12	3a	A1	10	slow-regular	0.798	0.536	0.489
12-3a-A1	12-3a-A1-8	1	DOR	12	3a	A1	10	slow-regular	0.972	0.918	0.059
12-3a-A1	12-3a-A1-8	1	CIP	12	3a	A1	10	slow-regular	0.745	0.619	0.204
12-3a-A1	12-3a-A1-8	1	CAR	12	3a	A1	10	slow-regular	0.94	0.56	0.679
12-3a-A1	12-3a-A1-9	1	DOR	12	3a	A1	10	slow-regular	0.869	0.918	-0.053
12-3a-A1	12-3a-A1-9	1	CEF	12	3a	A1	10	slow-regular	0.708	0.536	0.321
12-3a-A1	12-3a-A1-9	1	CAR	12	3a	A1	10	slow-regular	0.883	0.56	0.577
12-3a-A1	12-3a-A1-9	1	GEN	12	3a	A1	10	slow-regular	0.622	0.816	-0.238
12-3a-A1	12-3a-A1-9	1	CIP	12	3a	A1	10	slow-regular	0.814	0.619	0.315
12-3a-A1	12-3a-A1-anc13	anc	DOR	12	3a	A1	10	ancestor	1.033	0.918	0.125
12-3a-A1	12-3a-A1-anc14	anc	DOR	12	3a	A1	10	ancestor	0.804	0.918	-0.124
12-3a-A1	12-3a-A1-anc15	anc	DOR	12	3a	A1	10	ancestor	0.847	0.854	-0.008
12-3a-A1	12-3a-A1-anc16	anc	DOR	12	3a	A1	10	ancestor	0.862	0.854	0.009
12-3a-A1	12-3a-A1-anc37	anc	CAR	12	3a	A1	10	ancestor	0.602	0.56	0.075
12-3a-A1	12-3a-A1-anc37	anc	GEN	12	3a	A1	10	ancestor	0.834	0.816	0.022
12-3a-A1	12-3a-A1-anc37	anc	CIP	12	3a	A1	10	ancestor	0.635	0.619	0.026
12-3a-A1	12-3a-A1-anc37	anc	CEF	12	3a	A1	10	ancestor	0.553	0.536	0.032
12-3a-A1	12-3a-A1-anc38	anc	CIP	12	3a	A1	10	ancestor	0.603	0.619	-0.026
12-3a-A1	12-3a-A1-anc38	anc	CAR	12	3a	A1	10	ancestor	0.517	0.56	-0.077
12-3a-A1	12-3a-A1-anc38	anc	CEF	12	3a	A1	10	ancestor	0.52	0.536	-0.03
12-3a-A1	12-3a-A1-anc38	anc	GEN	12	3a	A1	10	ancestor	0.798	0.816	-0.022
12-3a-A1	12-3a-A1-anc39	anc	CIP	12	3a	A1	10	ancestor	0.71	0.731	-0.029
12-3a-A1	12-3a-A1-anc39	anc	CEF	12	3a	A1	10	ancestor	0.484	0.518	-0.066
12-3a-A1	12-3a-A1-anc39	anc	CAR	12	3a	A1	10	ancestor	0.613	0.616	-0.005
12-3a-A1	12-3a-A1-anc39	anc	GEN	12	3a	A1	10	ancestor	0.815	0.852	-0.043
12-3a-A1	12-3a-A1-anc40	anc	GEN	12	3a	A1	10	ancestor	0.89	0.852	0.045
12-3a-A1	12-3a-A1-anc40	anc	CIP	12	3a	A1	10	ancestor	0.752	0.731	0.029
12-3a-A1	12-3a-A1-anc40	anc	CAR	12	3a	A1	10	ancestor	0.619	0.616	0.005
12-3a-A1	12-3a-A1-anc40	anc	CEF	12	3a	A1	10	ancestor	0.551	0.518	0.064
12-3a-A7	12-3a-A7-1	1	GEN	12	3a	A7	9	slow-regular	0.615	0.836	-0.264
12-3a-A7	12-3a-A7-1	1	DOR	12	3a	A7	9	slow-regular	0.596	0.566	0.053
12-3a-A7	12-3a-A7-1	1	CEF	12	3a	A7	9	slow-regular	0.778	0.532	0.462
12-3a-A7	12-3a-A7-1	1	CIP	12	3a	A7	9	slow-regular	0.71	0.589	0.205
12-3a-A7	12-3a-A7-1	1	CAR	12	3a	A7	9	slow-regular	0.839	0.583	0.439
12-3a-A7	12-3a-A7-10	1	CEF	12	3a	A7	9	slow-regular	0.8	0.532	0.504
12-3a-A7	12-3a-A7-10	1	CIP	12	3a	A7	9	slow-regular	0.709	0.589	0.204
12-3a-A7	12-3a-A7-10	1	DOR	12	3a	A7	9	slow-regular	0.514	0.566	-0.092
12-3a-A7	12-3a-A7-10	1	CAR	12	3a	A7	9	slow-regular	0.79	0.583	0.355
12-3a-A7	12-3a-A7-10	1	GEN	12	3a	A7	9	slow-regular	0.588	0.836	-0.297
12-3a-A7	12-3a-A7-11	1	CEF	12	3a	A7	9	slow-regular	0.759	0.526	0.443
12-3a-A7	12-3a-A7-11	1	GEN	12	3a	A7	9	slow-regular	0.676	0.766	-0.117
12-3a-A7	12-3a-A7-11	1	CIP	12	3a	A7	9	slow-regular	0.715	0.563	0.27
12-3a-A7	12-3a-A7-11	1	CAR	12	3a	A7	9	slow-regular	0.887	0.597	0.486
12-3a-A7	12-3a-A7-11	1	DOR	12	3a	A7	9	slow-regular	0.533	0.5	0.066
12-3a-A7	12-3a-A7-12	1	GEN	12	3a	A7	9	slow-regular	0.633	0.766	-0.174
12-3a-A7	12-3a-A7-12	1	CAR	12	3a	A7	9	slow-regular	0.784	0.597	0.313
12-3a-A7	12-3a-A7-12	1	DOR	12	3a	A7	9	slow-regular	0.511	0.5	0.022
12-3a-A7	12-3a-A7-12	1	CIP	12	3a	A7	9	slow-regular	0.71	0.563	0.261
12-3a-A7	12-3a-A7-12	1	CEF	12	3a	A7	9	slow-regular	0.733	0.526	0.394
12-3a-A7	12-3a-A7-13	1	GEN	12	3a	A7	9	slow-regular	0.652	0.766	-0.149
12-3a-A7	12-3a-A7-13	1	CAR	12	3a	A7	9	slow-regular	0.835	0.597	0.399
12-3a-A7	12-3a-A7-13	1	CEF	12	3a	A7	9	slow-regular	0.771	0.526	0.466
12-3a-A7	12-3a-A7-13	1	CIP	12	3a	A7	9	slow-regular	0.705	0.563	0.252
12-3a-A7	12-3a-A7-13	1	DOR	12	3a	A7	9	slow-regular	0.542	0.5	0.084
12-3a-A7	12-3a-A7-14	1	CEF	12	3a	A7	9	slow-regular	0.741	0.526	0.409
12-3a-A7	12-3a-A7-14	1	DOR	12	3a	A7	9	slow-regular	0.554	0.5	0.108
12-3a-A7	12-3a-A7-14	1	CAR	12	3a	A7	9	slow-regular	0.831	0.597	0.392
12-3a-A7	12-3a-A7-14	1	GEN	12	3a	A7	9	slow-regular	0.629	0.766	-0.179
12-3a-A7	12-3a-A7-14	1	CIP	12	3a	A7	9	slow-regular	0.682	0.563	0.211
12-3a-A7	12-3a-A7-15	1	CEF	12	3a	A7	9	slow-regular	0.705	0.526	0.34
12-3a-A7	12-3a-A7-15	1	CAR	12	3a	A7	9	slow-regular	0.88	0.597	0.474
12-3a-A7	12-3a-A7-15	1	GEN	12	3a	A7	9	slow-regular	0.619	0.766	-0.192
12-3a-A7	12-3a-A7-15	1	DOR	12	3a	A7	9	slow-regular	0.539	0.5	0.078
12-3a-A7	12-3a-A7-15	1	CIP	12	3a	A7	9	slow-regular	0.699	0.563	0.242
12-3a-A7	12-3a-A7-16	1	CEF	12	3a	A7	9	slow-regular	0.648	0.526	0.232
12-3a-A7	12-3a-A7-16	1	CAR	12	3a	A7	9	slow-regular	0.827	0.597	0.385
12-3a-A7	12-3a-A7-16	1	GEN	12	3a	A7	9	slow-regular	0.583	0.766	-0.239
12-3a-A7	12-3a-A7-16	1	DOR	12	3a	A7	9	slow-regular	0.572	0.5	0.144
12-3a-A7	12-3a-A7-16	1	CIP	12	3a	A7	9	slow-regular	0.664	0.563	0.179
12-3a-A7	12-3a-A7-17	2	GEN	12	3a	A7	9	slow-regular	0.128	0.766	-0.833
12-3a-A7	12-3a-A7-17	2	CAR	12	3a	A7	9	slow-regular	0.1	0.597	-0.832
12-3a-A7	12-3a-A7-17	2	CEF	12	3a	A7	9	slow-regular	0.207	0.526	-0.606
12-3a-A7	12-3a-A7-17	2	DOR	12	3a	A7	9	slow-regular	0.148	0.5	-0.704
12-3a-A7	12-3a-A7-17	2	CIP	12	3a	A7	9	slow-regular	0.103	0.563	-0.817
12-3a-A7	12-3a-A7-18	1	GEN	12	3a	A7	9	slow-regular	0.591	0.766	-0.228
12-3a-A7	12-3a-A7-18	1	DOR	12	3a	A7	9	slow-regular	0.461	0.5	-0.078
12-3a-A7	12-3a-A7-18	1	CEF	12	3a	A7	9	slow-regular	0.692	0.526	0.316
12-3a-A7	12-3a-A7-18	1	CIP	12	3a	A7	9	slow-regular	0.677	0.563	0.202
12-3a-A7	12-3a-A7-18	1	CAR	12	3a	A7	9	slow-regular	0.835	0.597	0.399
12-3a-A7	12-3a-A7-19	1	CIP	12	3a	A7	9	slow-regular	0.682	0.563	0.211
12-3a-A7	12-3a-A7-19	1	GEN	12	3a	A7	9	slow-regular	0.584	0.766	-0.238
12-3a-A7	12-3a-A7-19	1	DOR	12	3a	A7	9	slow-regular	0.5	0.5	0
12-3a-A7	12-3a-A7-19	1	CAR	12	3a	A7	9	slow-regular	0.808	0.597	0.353
12-3a-A7	12-3a-A7-19	1	CEF	12	3a	A7	9	slow-regular	0.679	0.526	0.291
12-3a-A7	12-3a-A7-2	1	CIP	12	3a	A7	9	slow-regular	0.725	0.589	0.231
12-3a-A7	12-3a-A7-2	1	GEN	12	3a	A7	9	slow-regular	0.581	0.836	-0.305
12-3a-A7	12-3a-A7-2	1	CEF	12	3a	A7	9	slow-regular	0.749	0.532	0.408
12-3a-A7	12-3a-A7-2	1	CAR	12	3a	A7	9	slow-regular	0.839	0.583	0.439
12-3a-A7	12-3a-A7-2	1	DOR	12	3a	A7	9	slow-regular	0.554	0.566	-0.021
12-3a-A7	12-3a-A7-20	1	CEF	12	3a	A7	9	slow-regular	0.736	0.526	0.399
12-3a-A7	12-3a-A7-20	1	CIP	12	3a	A7	9	slow-regular	0.679	0.563	0.206
12-3a-A7	12-3a-A7-20	1	GEN	12	3a	A7	9	slow-regular	0.587	0.766	-0.234
12-3a-A7	12-3a-A7-20	1	CAR	12	3a	A7	9	slow-regular	0.798	0.597	0.337
12-3a-A7	12-3a-A7-20	1	DOR	12	3a	A7	9	slow-regular	0.536	0.5	0.072
12-3a-A7	12-3a-A7-3	1	CIP	12	3a	A7	9	slow-regular	0.705	0.589	0.197
12-3a-A7	12-3a-A7-3	1	GEN	12	3a	A7	9	slow-regular	0.572	0.836	-0.316
12-3a-A7	12-3a-A7-3	1	CAR	12	3a	A7	9	slow-regular	0.834	0.583	0.431
12-3a-A7	12-3a-A7-3	1	CEF	12	3a	A7	9	slow-regular	0.787	0.532	0.479
12-3a-A7	12-3a-A7-3	1	DOR	12	3a	A7	9	slow-regular	0.514	0.566	-0.092
12-3a-A7	12-3a-A7-4	1	CAR	12	3a	A7	9	slow-regular	0.814	0.583	0.396
12-3a-A7	12-3a-A7-4	1	CEF	12	3a	A7	9	slow-regular	0.827	0.532	0.555
12-3a-A7	12-3a-A7-4	1	CIP	12	3a	A7	9	slow-regular	0.729	0.589	0.238
12-3a-A7	12-3a-A7-4	1	DOR	12	3a	A7	9	slow-regular	0.566	0.566	0
12-3a-A7	12-3a-A7-4	1	GEN	12	3a	A7	9	slow-regular	0.578	0.836	-0.309
12-3a-A7	12-3a-A7-5	1	CEF	12	3a	A7	9	slow-regular	0.784	0.532	0.474
12-3a-A7	12-3a-A7-5	1	CAR	12	3a	A7	9	slow-regular	0.864	0.583	0.482
12-3a-A7	12-3a-A7-5	1	DOR	12	3a	A7	9	slow-regular	0.571	0.566	0.009
12-3a-A7	12-3a-A7-5	1	GEN	12	3a	A7	9	slow-regular	0.573	0.836	-0.315
12-3a-A7	12-3a-A7-5	1	CIP	12	3a	A7	9	slow-regular	0.714	0.589	0.212
12-3a-A7	12-3a-A7-6	1	CEF	12	3a	A7	9	slow-regular	0.714	0.532	0.342
12-3a-A7	12-3a-A7-6	1	DOR	12	3a	A7	9	slow-regular	0.498	0.566	-0.12
12-3a-A7	12-3a-A7-6	1	GEN	12	3a	A7	9	slow-regular	0.559	0.836	-0.331
12-3a-A7	12-3a-A7-6	1	CAR	12	3a	A7	9	slow-regular	0.792	0.583	0.358
12-3a-A7	12-3a-A7-6	1	CIP	12	3a	A7	9	slow-regular	0.729	0.589	0.238
12-3a-A7	12-3a-A7-7	1	CAR	12	3a	A7	9	slow-regular	0.853	0.583	0.463
12-3a-A7	12-3a-A7-7	1	DOR	12	3a	A7	9	slow-regular	0.544	0.566	-0.039
12-3a-A7	12-3a-A7-7	1	GEN	12	3a	A7	9	slow-regular	0.61	0.836	-0.27
12-3a-A7	12-3a-A7-7	1	CIP	12	3a	A7	9	slow-regular	0.766	0.589	0.301
12-3a-A7	12-3a-A7-7	1	CEF	12	3a	A7	9	slow-regular	0.74	0.532	0.391
12-3a-A7	12-3a-A7-8	1	GEN	12	3a	A7	9	slow-regular	0.565	0.836	-0.324
12-3a-A7	12-3a-A7-8	1	CIP	12	3a	A7	9	slow-regular	0.711	0.589	0.207
12-3a-A7	12-3a-A7-8	1	CEF	12	3a	A7	9	slow-regular	0.732	0.532	0.376
12-3a-A7	12-3a-A7-8	1	DOR	12	3a	A7	9	slow-regular	0.526	0.566	-0.071
12-3a-A7	12-3a-A7-8	1	CAR	12	3a	A7	9	slow-regular	0.834	0.583	0.431
12-3a-A7	12-3a-A7-9	1	DOR	12	3a	A7	9	slow-regular	0.544	0.566	-0.039
12-3a-A7	12-3a-A7-9	1	GEN	12	3a	A7	9	slow-regular	0.57	0.836	-0.318
12-3a-A7	12-3a-A7-9	1	CIP	12	3a	A7	9	slow-regular	0.703	0.589	0.194
12-3a-A7	12-3a-A7-9	1	CEF	12	3a	A7	9	slow-regular	0.737	0.532	0.385
12-3a-A7	12-3a-A7-9	1	CAR	12	3a	A7	9	slow-regular	0.791	0.583	0.357
12-3a-A7	12-3a-A7-anc101	anc	CAR	12	3a	A7	9	ancestor	0.562	0.583	-0.036
12-3a-A7	12-3a-A7-anc101	anc	CIP	12	3a	A7	9	ancestor	0.594	0.589	0.008
12-3a-A7	12-3a-A7-anc101	anc	DOR	12	3a	A7	9	ancestor	0.56	0.566	-0.011
12-3a-A7	12-3a-A7-anc101	anc	GEN	12	3a	A7	9	ancestor	0.836	0.836	0
12-3a-A7	12-3a-A7-anc101	anc	CEF	12	3a	A7	9	ancestor	0.539	0.532	0.013
12-3a-A7	12-3a-A7-anc102	anc	CEF	12	3a	A7	9	ancestor	0.525	0.532	-0.013
12-3a-A7	12-3a-A7-anc102	anc	DOR	12	3a	A7	9	ancestor	0.572	0.566	0.011
12-3a-A7	12-3a-A7-anc102	anc	CIP	12	3a	A7	9	ancestor	0.585	0.589	-0.007
12-3a-A7	12-3a-A7-anc102	anc	CAR	12	3a	A7	9	ancestor	0.604	0.583	0.036
12-3a-A7	12-3a-A7-anc102	anc	GEN	12	3a	A7	9	ancestor	0.837	0.836	0.001
12-3a-A7	12-3a-A7-anc103	anc	CAR	12	3a	A7	9	ancestor	0.648	0.597	0.085
12-3a-A7	12-3a-A7-anc103	anc	CIP	12	3a	A7	9	ancestor	0.538	0.563	-0.044
12-3a-A7	12-3a-A7-anc103	anc	CEF	12	3a	A7	9	ancestor	0.463	0.526	-0.12
12-3a-A7	12-3a-A7-anc103	anc	GEN	12	3a	A7	9	ancestor	0.715	0.766	-0.067
12-3a-A7	12-3a-A7-anc103	anc	DOR	12	3a	A7	9	ancestor	0.487	0.5	-0.026
12-3a-A7	12-3a-A7-anc104	anc	CIP	12	3a	A7	9	ancestor	0.588	0.563	0.044
12-3a-A7	12-3a-A7-anc104	anc	CEF	12	3a	A7	9	ancestor	0.588	0.526	0.118
12-3a-A7	12-3a-A7-anc104	anc	DOR	12	3a	A7	9	ancestor	0.514	0.5	0.028
12-3a-A7	12-3a-A7-anc104	anc	GEN	12	3a	A7	9	ancestor	0.818	0.766	0.068
12-3a-A7	12-3a-A7-anc104	anc	CAR	12	3a	A7	9	ancestor	0.546	0.597	-0.085
12-3a-B1	12-3a-B1-1	1	CEF	12	3a	B1	2	mono	0.549	0.504	0.089
12-3a-B1	12-3a-B1-1	1	CAR	12	3a	B1	2	mono	0.496	0.589	-0.158
12-3a-B1	12-3a-B1-1	1	DOR	12	3a	B1	2	mono	0.925	0.876	0.056
12-3a-B1	12-3a-B1-1	1	CIP	12	3a	B1	2	mono	0.597	0.608	-0.018
12-3a-B1	12-3a-B1-1	1	GEN	12	3a	B1	2	mono	0.83	0.826	0.005
12-3a-B1	12-3a-B1-10	1	GEN	12	3a	B1	2	mono	0.853	0.826	0.033
12-3a-B1	12-3a-B1-10	1	DOR	12	3a	B1	2	mono	0.742	0.876	-0.153
12-3a-B1	12-3a-B1-10	1	CAR	12	3a	B1	2	mono	0.552	0.589	-0.063
12-3a-B1	12-3a-B1-10	1	CIP	12	3a	B1	2	mono	0.618	0.608	0.016
12-3a-B1	12-3a-B1-10	1	CEF	12	3a	B1	2	mono	0.592	0.504	0.175
12-3a-B1	12-3a-B1-11	1	CEF	12	3a	B1	2	mono	0.516	0.516	0
12-3a-B1	12-3a-B1-11	1	GEN	12	3a	B1	2	mono	0.894	0.819	0.092
12-3a-B1	12-3a-B1-11	1	CAR	12	3a	B1	2	mono	0.547	0.59	-0.073
12-3a-B1	12-3a-B1-11	1	DOR	12	3a	B1	2	mono	0.825	0.864	-0.045
12-3a-B1	12-3a-B1-11	1	CIP	12	3a	B1	2	mono	0.629	0.644	-0.023
12-3a-B1	12-3a-B1-12	1	CEF	12	3a	B1	2	mono	0.593	0.516	0.149
12-3a-B1	12-3a-B1-12	1	GEN	12	3a	B1	2	mono	0.748	0.819	-0.087
12-3a-B1	12-3a-B1-12	1	CAR	12	3a	B1	2	mono	0.603	0.59	0.022
12-3a-B1	12-3a-B1-12	1	DOR	12	3a	B1	2	mono	0.849	0.864	-0.017
12-3a-B1	12-3a-B1-12	1	CIP	12	3a	B1	2	mono	0.583	0.644	-0.095
12-3a-B1	12-3a-B1-13	1	DOR	12	3a	B1	2	mono	0.689	0.864	-0.203
12-3a-B1	12-3a-B1-13	1	CEF	12	3a	B1	2	mono	0.512	0.516	-0.008
12-3a-B1	12-3a-B1-13	1	CIP	12	3a	B1	2	mono	0.565	0.644	-0.123
12-3a-B1	12-3a-B1-13	1	GEN	12	3a	B1	2	mono	0.756	0.819	-0.077
12-3a-B1	12-3a-B1-13	1	CAR	12	3a	B1	2	mono	0.646	0.59	0.095
12-3a-B1	12-3a-B1-14	1	CEF	12	3a	B1	2	mono	0.558	0.516	0.081
12-3a-B1	12-3a-B1-14	1	CAR	12	3a	B1	2	mono	0.604	0.59	0.024
12-3a-B1	12-3a-B1-14	1	CIP	12	3a	B1	2	mono	0.588	0.644	-0.087
12-3a-B1	12-3a-B1-14	1	DOR	12	3a	B1	2	mono	0.791	0.864	-0.084
12-3a-B1	12-3a-B1-14	1	GEN	12	3a	B1	2	mono	0.819	0.819	0
12-3a-B1	12-3a-B1-15	1	CIP	12	3a	B1	2	mono	0.63	0.644	-0.022
12-3a-B1	12-3a-B1-15	1	DOR	12	3a	B1	2	mono	0.792	0.864	-0.083
12-3a-B1	12-3a-B1-15	1	CEF	12	3a	B1	2	mono	0.512	0.516	-0.008
12-3a-B1	12-3a-B1-15	1	CAR	12	3a	B1	2	mono	0.633	0.59	0.073
12-3a-B1	12-3a-B1-15	1	GEN	12	3a	B1	2	mono	0.789	0.819	-0.037
12-3a-B1	12-3a-B1-16	1	CIP	12	3a	B1	2	mono	0.62	0.644	-0.037
12-3a-B1	12-3a-B1-16	1	CEF	12	3a	B1	2	mono	0.493	0.516	-0.045
12-3a-B1	12-3a-B1-16	1	CAR	12	3a	B1	2	mono	0.651	0.59	0.103
12-3a-B1	12-3a-B1-16	1	DOR	12	3a	B1	2	mono	0.802	0.864	-0.072
12-3a-B1	12-3a-B1-16	1	GEN	12	3a	B1	2	mono	0.762	0.819	-0.07
12-3a-B1	12-3a-B1-17	1	CIP	12	3a	B1	2	mono	0.634	0.644	-0.016
12-3a-B1	12-3a-B1-17	1	CEF	12	3a	B1	2	mono	0.536	0.516	0.039
12-3a-B1	12-3a-B1-17	1	CAR	12	3a	B1	2	mono	0.558	0.59	-0.054
12-3a-B1	12-3a-B1-17	1	DOR	12	3a	B1	2	mono	0.879	0.864	0.017
12-3a-B1	12-3a-B1-17	1	GEN	12	3a	B1	2	mono	0.787	0.819	-0.039
12-3a-B1	12-3a-B1-18	1	CIP	12	3a	B1	2	mono	0.604	0.644	-0.062
12-3a-B1	12-3a-B1-18	1	DOR	12	3a	B1	2	mono	0.764	0.864	-0.116
12-3a-B1	12-3a-B1-18	1	CEF	12	3a	B1	2	mono	0.508	0.516	-0.016
12-3a-B1	12-3a-B1-18	1	CAR	12	3a	B1	2	mono	0.645	0.59	0.093
12-3a-B1	12-3a-B1-18	1	GEN	12	3a	B1	2	mono	0.738	0.819	-0.099
12-3a-B1	12-3a-B1-19	1	GEN	12	3a	B1	2	mono	0.735	0.819	-0.103
12-3a-B1	12-3a-B1-19	1	CAR	12	3a	B1	2	mono	0.56	0.59	-0.051
12-3a-B1	12-3a-B1-19	1	CIP	12	3a	B1	2	mono	0.612	0.644	-0.05
12-3a-B1	12-3a-B1-19	1	DOR	12	3a	B1	2	mono	0.811	0.864	-0.061
12-3a-B1	12-3a-B1-19	1	CEF	12	3a	B1	2	mono	0.486	0.516	-0.058
12-3a-B1	12-3a-B1-2	1	CIP	12	3a	B1	2	mono	0.596	0.608	-0.02
12-3a-B1	12-3a-B1-2	1	CEF	12	3a	B1	2	mono	0.49	0.504	-0.028
12-3a-B1	12-3a-B1-2	1	CAR	12	3a	B1	2	mono	0.501	0.589	-0.149
12-3a-B1	12-3a-B1-2	1	DOR	12	3a	B1	2	mono	0.813	0.876	-0.072
12-3a-B1	12-3a-B1-2	1	GEN	12	3a	B1	2	mono	0.783	0.826	-0.052
12-3a-B1	12-3a-B1-20	1	DOR	12	3a	B1	2	mono	0.816	0.864	-0.056
12-3a-B1	12-3a-B1-20	1	GEN	12	3a	B1	2	mono	0.792	0.819	-0.033
12-3a-B1	12-3a-B1-20	1	CIP	12	3a	B1	2	mono	0.598	0.644	-0.071
12-3a-B1	12-3a-B1-20	1	CAR	12	3a	B1	2	mono	0.605	0.59	0.025
12-3a-B1	12-3a-B1-20	1	CEF	12	3a	B1	2	mono	0.499	0.516	-0.033
12-3a-B1	12-3a-B1-3	1	DOR	12	3a	B1	2	mono	0.785	0.876	-0.104
12-3a-B1	12-3a-B1-3	1	CEF	12	3a	B1	2	mono	0.538	0.504	0.067
12-3a-B1	12-3a-B1-3	1	CIP	12	3a	B1	2	mono	0.587	0.608	-0.035
12-3a-B1	12-3a-B1-3	1	GEN	12	3a	B1	2	mono	0.757	0.826	-0.084
12-3a-B1	12-3a-B1-3	1	CAR	12	3a	B1	2	mono	0.503	0.589	-0.146
12-3a-B1	12-3a-B1-4	1	CIP	12	3a	B1	2	mono	0.599	0.608	-0.015
12-3a-B1	12-3a-B1-4	1	GEN	12	3a	B1	2	mono	0.766	0.826	-0.073
12-3a-B1	12-3a-B1-4	1	CAR	12	3a	B1	2	mono	0.503	0.589	-0.146
12-3a-B1	12-3a-B1-4	1	DOR	12	3a	B1	2	mono	0.794	0.876	-0.094
12-3a-B1	12-3a-B1-4	1	CEF	12	3a	B1	2	mono	0.507	0.504	0.006
12-3a-B1	12-3a-B1-5	1	CEF	12	3a	B1	2	mono	0.482	0.504	-0.044
12-3a-B1	12-3a-B1-5	1	DOR	12	3a	B1	2	mono	0.894	0.876	0.021
12-3a-B1	12-3a-B1-5	1	CIP	12	3a	B1	2	mono	0.602	0.608	-0.01
12-3a-B1	12-3a-B1-5	1	GEN	12	3a	B1	2	mono	0.761	0.826	-0.079
12-3a-B1	12-3a-B1-5	1	CAR	12	3a	B1	2	mono	0.587	0.589	-0.003
12-3a-B1	12-3a-B1-6	1	CIP	12	3a	B1	2	mono	0.583	0.608	-0.041
12-3a-B1	12-3a-B1-6	1	GEN	12	3a	B1	2	mono	0.761	0.826	-0.079
12-3a-B1	12-3a-B1-6	1	CAR	12	3a	B1	2	mono	0.517	0.589	-0.122
12-3a-B1	12-3a-B1-6	1	DOR	12	3a	B1	2	mono	0.949	0.876	0.083
12-3a-B1	12-3a-B1-6	1	CEF	12	3a	B1	2	mono	0.544	0.504	0.079
12-3a-B1	12-3a-B1-7	1	CEF	12	3a	B1	2	mono	0.54	0.504	0.071
12-3a-B1	12-3a-B1-7	1	DOR	12	3a	B1	2	mono	0.811	0.876	-0.074
12-3a-B1	12-3a-B1-7	1	CIP	12	3a	B1	2	mono	0.608	0.608	0
12-3a-B1	12-3a-B1-7	1	GEN	12	3a	B1	2	mono	0.73	0.826	-0.116
12-3a-B1	12-3a-B1-7	1	CAR	12	3a	B1	2	mono	0.633	0.589	0.075
12-3a-B1	12-3a-B1-8	1	DOR	12	3a	B1	2	mono	0.889	0.876	0.015
12-3a-B1	12-3a-B1-8	1	GEN	12	3a	B1	2	mono	0.732	0.826	-0.114
12-3a-B1	12-3a-B1-8	1	CIP	12	3a	B1	2	mono	0.614	0.608	0.01
12-3a-B1	12-3a-B1-8	1	CAR	12	3a	B1	2	mono	0.539	0.589	-0.085
12-3a-B1	12-3a-B1-8	1	CEF	12	3a	B1	2	mono	0.553	0.504	0.097
12-3a-B1	12-3a-B1-9	1	DOR	12	3a	B1	2	mono	0.741	0.876	-0.154
12-3a-B1	12-3a-B1-9	1	CEF	12	3a	B1	2	mono	0.554	0.504	0.099
12-3a-B1	12-3a-B1-9	1	CIP	12	3a	B1	2	mono	0.584	0.608	-0.039
12-3a-B1	12-3a-B1-9	1	CAR	12	3a	B1	2	mono	0.559	0.589	-0.051
12-3a-B1	12-3a-B1-9	1	GEN	12	3a	B1	2	mono	0.758	0.826	-0.082
12-3a-B1	12-3a-B1-anc17	anc	DOR	12	3a	B1	2	ancestor	0.954	0.876	0.089
12-3a-B1	12-3a-B1-anc18	anc	DOR	12	3a	B1	2	ancestor	0.797	0.876	-0.09
12-3a-B1	12-3a-B1-anc19	anc	DOR	12	3a	B1	2	ancestor	0.904	0.864	0.046
12-3a-B1	12-3a-B1-anc20	anc	DOR	12	3a	B1	2	ancestor	0.825	0.864	-0.045
12-3a-B1	12-3a-B1-anc41	anc	CIP	12	3a	B1	2	ancestor	0.609	0.608	0.002
12-3a-B1	12-3a-B1-anc41	anc	GEN	12	3a	B1	2	ancestor	0.855	0.826	0.035
12-3a-B1	12-3a-B1-anc41	anc	CAR	12	3a	B1	2	ancestor	0.524	0.589	-0.11
12-3a-B1	12-3a-B1-anc41	anc	CEF	12	3a	B1	2	ancestor	0.491	0.504	-0.026
12-3a-B1	12-3a-B1-anc42	anc	GEN	12	3a	B1	2	ancestor	0.798	0.826	-0.034
12-3a-B1	12-3a-B1-anc42	anc	CEF	12	3a	B1	2	ancestor	0.517	0.504	0.026
12-3a-B1	12-3a-B1-anc42	anc	CIP	12	3a	B1	2	ancestor	0.608	0.608	0
12-3a-B1	12-3a-B1-anc42	anc	CAR	12	3a	B1	2	ancestor	0.654	0.589	0.11
12-3a-B1	12-3a-B1-anc43	anc	CEF	12	3a	B1	2	ancestor	0.515	0.516	-0.002
12-3a-B1	12-3a-B1-anc43	anc	GEN	12	3a	B1	2	ancestor	0.78	0.819	-0.048
12-3a-B1	12-3a-B1-anc43	anc	CAR	12	3a	B1	2	ancestor	0.602	0.59	0.02
12-3a-B1	12-3a-B1-anc43	anc	CIP	12	3a	B1	2	ancestor	0.634	0.644	-0.016
12-3a-B1	12-3a-B1-anc44	anc	GEN	12	3a	B1	2	ancestor	0.858	0.819	0.048
12-3a-B1	12-3a-B1-anc44	anc	CEF	12	3a	B1	2	ancestor	0.516	0.516	0
12-3a-B1	12-3a-B1-anc44	anc	CAR	12	3a	B1	2	ancestor	0.578	0.59	-0.02
12-3a-B1	12-3a-B1-anc44	anc	CIP	12	3a	B1	2	ancestor	0.654	0.644	0.016
12-3a-B7	12-3a-B7-1	1	DOR	12	3a	B7	8	slow-regular	1.226	0.79	0.552
12-3a-B7	12-3a-B7-1	1	CAR	12	3a	B7	8	slow-regular	0.74	0.532	0.391
12-3a-B7	12-3a-B7-1	1	CIP	12	3a	B7	8	slow-regular	0.596	0.554	0.076
12-3a-B7	12-3a-B7-1	1	CEF	12	3a	B7	8	slow-regular	0.671	0.433	0.55
12-3a-B7	12-3a-B7-1	1	GEN	12	3a	B7	8	slow-regular	0.63	0.636	-0.009
12-3a-B7	12-3a-B7-10	1	CEF	12	3a	B7	8	slow-regular	0.678	0.433	0.566
12-3a-B7	12-3a-B7-10	1	DOR	12	3a	B7	8	slow-regular	1.405	0.79	0.778
12-3a-B7	12-3a-B7-10	1	CAR	12	3a	B7	8	slow-regular	0.739	0.532	0.389
12-3a-B7	12-3a-B7-10	1	CIP	12	3a	B7	8	slow-regular	0.547	0.554	-0.013
12-3a-B7	12-3a-B7-10	1	GEN	12	3a	B7	8	slow-regular	0.582	0.636	-0.085
12-3a-B7	12-3a-B7-11	1	DOR	12	3a	B7	8	slow-regular	1.204	0.789	0.526
12-3a-B7	12-3a-B7-11	1	CAR	12	3a	B7	8	slow-regular	0.674	0.562	0.199
12-3a-B7	12-3a-B7-11	1	CEF	12	3a	B7	8	slow-regular	0.723	0.436	0.658
12-3a-B7	12-3a-B7-11	1	GEN	12	3a	B7	8	slow-regular	0.59	0.712	-0.171
12-3a-B7	12-3a-B7-11	1	CIP	12	3a	B7	8	slow-regular	0.543	0.581	-0.065
12-3a-B7	12-3a-B7-12	1	CIP	12	3a	B7	8	slow-regular	0.589	0.581	0.014
12-3a-B7	12-3a-B7-12	1	CEF	12	3a	B7	8	slow-regular	0.637	0.436	0.461
12-3a-B7	12-3a-B7-12	1	GEN	12	3a	B7	8	slow-regular	0.603	0.712	-0.153
12-3a-B7	12-3a-B7-12	1	DOR	12	3a	B7	8	slow-regular	1.247	0.789	0.58
12-3a-B7	12-3a-B7-12	1	CAR	12	3a	B7	8	slow-regular	0.695	0.562	0.237
12-3a-B7	12-3a-B7-13	1	DOR	12	3a	B7	8	slow-regular	1.208	0.789	0.531
12-3a-B7	12-3a-B7-13	1	CIP	12	3a	B7	8	slow-regular	0.556	0.581	-0.043
12-3a-B7	12-3a-B7-13	1	GEN	12	3a	B7	8	slow-regular	0.568	0.712	-0.202
12-3a-B7	12-3a-B7-13	1	CAR	12	3a	B7	8	slow-regular	0.732	0.562	0.302
12-3a-B7	12-3a-B7-13	1	CEF	12	3a	B7	8	slow-regular	0.619	0.436	0.42
12-3a-B7	12-3a-B7-14	1	CIP	12	3a	B7	8	slow-regular	0.576	0.581	-0.009
12-3a-B7	12-3a-B7-14	1	DOR	12	3a	B7	8	slow-regular	1.246	0.789	0.579
12-3a-B7	12-3a-B7-14	1	CAR	12	3a	B7	8	slow-regular	0.754	0.562	0.342
12-3a-B7	12-3a-B7-14	1	CEF	12	3a	B7	8	slow-regular	0.702	0.436	0.61
12-3a-B7	12-3a-B7-14	1	GEN	12	3a	B7	8	slow-regular	0.616	0.712	-0.135
12-3a-B7	12-3a-B7-15	1	CAR	12	3a	B7	8	slow-regular	0.718	0.562	0.278
12-3a-B7	12-3a-B7-15	1	CEF	12	3a	B7	8	slow-regular	0.774	0.436	0.775
12-3a-B7	12-3a-B7-15	1	GEN	12	3a	B7	8	slow-regular	0.623	0.712	-0.125
12-3a-B7	12-3a-B7-15	1	DOR	12	3a	B7	8	slow-regular	1.31	0.789	0.66
12-3a-B7	12-3a-B7-15	1	CIP	12	3a	B7	8	slow-regular	0.576	0.581	-0.009
12-3a-B7	12-3a-B7-16	1	CEF	12	3a	B7	8	slow-regular	0.591	0.436	0.356
12-3a-B7	12-3a-B7-16	1	GEN	12	3a	B7	8	slow-regular	0.567	0.712	-0.204
12-3a-B7	12-3a-B7-16	1	DOR	12	3a	B7	8	slow-regular	1.2	0.789	0.521
12-3a-B7	12-3a-B7-16	1	CIP	12	3a	B7	8	slow-regular	0.554	0.581	-0.046
12-3a-B7	12-3a-B7-16	1	CAR	12	3a	B7	8	slow-regular	0.712	0.562	0.267
12-3a-B7	12-3a-B7-17	1	CEF	12	3a	B7	8	slow-regular	0.631	0.436	0.447
12-3a-B7	12-3a-B7-17	1	CAR	12	3a	B7	8	slow-regular	0.698	0.562	0.242
12-3a-B7	12-3a-B7-17	1	GEN	12	3a	B7	8	slow-regular	0.566	0.712	-0.205
12-3a-B7	12-3a-B7-17	1	DOR	12	3a	B7	8	slow-regular	1.155	0.789	0.464
12-3a-B7	12-3a-B7-17	1	CIP	12	3a	B7	8	slow-regular	0.595	0.581	0.024
12-3a-B7	12-3a-B7-18	1	DOR	12	3a	B7	8	slow-regular	1.271	0.789	0.611
12-3a-B7	12-3a-B7-18	1	CAR	12	3a	B7	8	slow-regular	0.742	0.562	0.32
12-3a-B7	12-3a-B7-18	1	CIP	12	3a	B7	8	slow-regular	0.535	0.581	-0.079
12-3a-B7	12-3a-B7-18	1	GEN	12	3a	B7	8	slow-regular	0.606	0.712	-0.149
12-3a-B7	12-3a-B7-18	1	CEF	12	3a	B7	8	slow-regular	0.679	0.436	0.557
12-3a-B7	12-3a-B7-19	1	CEF	12	3a	B7	8	slow-regular	0.63	0.436	0.445
12-3a-B7	12-3a-B7-19	1	CIP	12	3a	B7	8	slow-regular	0.545	0.581	-0.062
12-3a-B7	12-3a-B7-19	1	DOR	12	3a	B7	8	slow-regular	1.203	0.789	0.525
12-3a-B7	12-3a-B7-19	1	CAR	12	3a	B7	8	slow-regular	0.753	0.562	0.34
12-3a-B7	12-3a-B7-19	1	GEN	12	3a	B7	8	slow-regular	0.618	0.712	-0.132
12-3a-B7	12-3a-B7-2	1	DOR	12	3a	B7	8	slow-regular	1.242	0.79	0.572
12-3a-B7	12-3a-B7-2	1	CIP	12	3a	B7	8	slow-regular	0.6	0.554	0.083
12-3a-B7	12-3a-B7-2	1	GEN	12	3a	B7	8	slow-regular	0.561	0.636	-0.118
12-3a-B7	12-3a-B7-2	1	CAR	12	3a	B7	8	slow-regular	0.741	0.532	0.393
12-3a-B7	12-3a-B7-2	1	CEF	12	3a	B7	8	slow-regular	0.613	0.433	0.416
12-3a-B7	12-3a-B7-20	1	CEF	12	3a	B7	8	slow-regular	0.642	0.436	0.472
12-3a-B7	12-3a-B7-20	1	CIP	12	3a	B7	8	slow-regular	0.602	0.581	0.036
12-3a-B7	12-3a-B7-20	1	DOR	12	3a	B7	8	slow-regular	1.218	0.789	0.544
12-3a-B7	12-3a-B7-20	1	CAR	12	3a	B7	8	slow-regular	0.721	0.562	0.283
12-3a-B7	12-3a-B7-20	1	GEN	12	3a	B7	8	slow-regular	0.575	0.712	-0.192
12-3a-B7	12-3a-B7-3	1	CEF	12	3a	B7	8	slow-regular	0.664	0.433	0.533
12-3a-B7	12-3a-B7-3	1	CIP	12	3a	B7	8	slow-regular	0.559	0.554	0.009
12-3a-B7	12-3a-B7-3	1	CAR	12	3a	B7	8	slow-regular	0.699	0.532	0.314
12-3a-B7	12-3a-B7-3	1	DOR	12	3a	B7	8	slow-regular	1.359	0.79	0.72
12-3a-B7	12-3a-B7-3	1	GEN	12	3a	B7	8	slow-regular	0.578	0.636	-0.091
12-3a-B7	12-3a-B7-4	1	CIP	12	3a	B7	8	slow-regular	0.553	0.554	-0.002
12-3a-B7	12-3a-B7-4	1	DOR	12	3a	B7	8	slow-regular	1.244	0.79	0.575
12-3a-B7	12-3a-B7-4	1	GEN	12	3a	B7	8	slow-regular	0.619	0.636	-0.027
12-3a-B7	12-3a-B7-4	1	CAR	12	3a	B7	8	slow-regular	0.72	0.532	0.353
12-3a-B7	12-3a-B7-4	1	CEF	12	3a	B7	8	slow-regular	0.688	0.433	0.589
12-3a-B7	12-3a-B7-5	1	CEF	12	3a	B7	8	slow-regular	0.643	0.433	0.485
12-3a-B7	12-3a-B7-5	1	GEN	12	3a	B7	8	slow-regular	0.589	0.636	-0.074
12-3a-B7	12-3a-B7-5	1	CIP	12	3a	B7	8	slow-regular	0.559	0.554	0.009
12-3a-B7	12-3a-B7-5	1	DOR	12	3a	B7	8	slow-regular	1.337	0.79	0.692
12-3a-B7	12-3a-B7-5	1	CAR	12	3a	B7	8	slow-regular	0.759	0.532	0.427
12-3a-B7	12-3a-B7-6	1	CEF	12	3a	B7	8	slow-regular	0.64	0.433	0.478
12-3a-B7	12-3a-B7-6	1	DOR	12	3a	B7	8	slow-regular	1.196	0.79	0.514
12-3a-B7	12-3a-B7-6	1	GEN	12	3a	B7	8	slow-regular	0.601	0.636	-0.055
12-3a-B7	12-3a-B7-6	1	CIP	12	3a	B7	8	slow-regular	0.54	0.554	-0.025
12-3a-B7	12-3a-B7-6	1	CAR	12	3a	B7	8	slow-regular	0.685	0.532	0.288
12-3a-B7	12-3a-B7-7	1	CEF	12	3a	B7	8	slow-regular	0.632	0.433	0.46
12-3a-B7	12-3a-B7-7	1	DOR	12	3a	B7	8	slow-regular	1.314	0.79	0.663
12-3a-B7	12-3a-B7-7	1	CIP	12	3a	B7	8	slow-regular	0.561	0.554	0.013
12-3a-B7	12-3a-B7-7	1	GEN	12	3a	B7	8	slow-regular	0.618	0.636	-0.028
12-3a-B7	12-3a-B7-7	1	CAR	12	3a	B7	8	slow-regular	0.72	0.532	0.353
12-3a-B7	12-3a-B7-8	1	GEN	12	3a	B7	8	slow-regular	0.57	0.636	-0.104
12-3a-B7	12-3a-B7-8	1	DOR	12	3a	B7	8	slow-regular	1.316	0.79	0.666
12-3a-B7	12-3a-B7-8	1	CEF	12	3a	B7	8	slow-regular	0.635	0.433	0.467
12-3a-B7	12-3a-B7-8	1	CIP	12	3a	B7	8	slow-regular	0.542	0.554	-0.022
12-3a-B7	12-3a-B7-8	1	CAR	12	3a	B7	8	slow-regular	0.74	0.532	0.391
12-3a-B7	12-3a-B7-9	1	DOR	12	3a	B7	8	slow-regular	1.258	0.79	0.592
12-3a-B7	12-3a-B7-9	1	CIP	12	3a	B7	8	slow-regular	0.567	0.554	0.023
12-3a-B7	12-3a-B7-9	1	CAR	12	3a	B7	8	slow-regular	0.675	0.532	0.269
12-3a-B7	12-3a-B7-9	1	GEN	12	3a	B7	8	slow-regular	0.587	0.636	-0.077
12-3a-B7	12-3a-B7-9	1	CEF	12	3a	B7	8	slow-regular	0.663	0.433	0.531
12-3a-B7	12-3a-B7-anc21	anc	DOR	12	3a	B7	8	ancestor	0.789	0.79	-0.001
12-3a-B7	12-3a-B7-anc22	anc	DOR	12	3a	B7	8	ancestor	0.791	0.79	0.001
12-3a-B7	12-3a-B7-anc23	anc	DOR	12	3a	B7	8	ancestor	0.831	0.789	0.053
12-3a-B7	12-3a-B7-anc24	anc	DOR	12	3a	B7	8	ancestor	0.747	0.789	-0.053
12-3a-B7	12-3a-B7-anc69	anc	GEN	12	3a	B7	8	ancestor	0.668	0.636	0.05
12-3a-B7	12-3a-B7-anc69	anc	CEF	12	3a	B7	8	ancestor	0.395	0.433	-0.088
12-3a-B7	12-3a-B7-anc69	anc	CIP	12	3a	B7	8	ancestor	0.516	0.554	-0.069
12-3a-B7	12-3a-B7-anc69	anc	CAR	12	3a	B7	8	ancestor	0.523	0.532	-0.017
12-3a-B7	12-3a-B7-anc70	anc	CEF	12	3a	B7	8	ancestor	0.471	0.433	0.088
12-3a-B7	12-3a-B7-anc70	anc	CIP	12	3a	B7	8	ancestor	0.592	0.554	0.069
12-3a-B7	12-3a-B7-anc70	anc	GEN	12	3a	B7	8	ancestor	0.604	0.636	-0.05
12-3a-B7	12-3a-B7-anc70	anc	CAR	12	3a	B7	8	ancestor	0.542	0.532	0.019
12-3a-B7	12-3a-B7-anc71	anc	GEN	12	3a	B7	8	ancestor	0.681	0.712	-0.044
12-3a-B7	12-3a-B7-anc71	anc	CEF	12	3a	B7	8	ancestor	0.436	0.436	0
12-3a-B7	12-3a-B7-anc71	anc	CAR	12	3a	B7	8	ancestor	0.549	0.562	-0.023
12-3a-B7	12-3a-B7-anc71	anc	CIP	12	3a	B7	8	ancestor	0.576	0.581	-0.009
12-3a-B7	12-3a-B7-anc72	anc	CAR	12	3a	B7	8	ancestor	0.576	0.562	0.025
12-3a-B7	12-3a-B7-anc72	anc	GEN	12	3a	B7	8	ancestor	0.742	0.712	0.042
12-3a-B7	12-3a-B7-anc72	anc	CEF	12	3a	B7	8	ancestor	0.436	0.436	0
12-3a-B7	12-3a-B7-anc72	anc	CIP	12	3a	B7	8	ancestor	0.587	0.581	0.01
12-3a-C1	12-3a-C1-1	1	CEF	12	3a	C1	6	fast-regular	0.814	0.54	0.507
12-3a-C1	12-3a-C1-1	1	CIP	12	3a	C1	6	fast-regular	0.991	0.643	0.541
12-3a-C1	12-3a-C1-1	1	GEN	12	3a	C1	6	fast-regular	0.763	0.765	-0.003
12-3a-C1	12-3a-C1-1	1	DOR	12	3a	C1	6	fast-regular	0.678	0.602	0.126
12-3a-C1	12-3a-C1-1	1	CAR	12	3a	C1	6	fast-regular	0.98	0.566	0.731
12-3a-C1	12-3a-C1-10	1	CEF	12	3a	C1	6	fast-regular	0.715	0.54	0.324
12-3a-C1	12-3a-C1-10	1	CIP	12	3a	C1	6	fast-regular	0.948	0.643	0.474
12-3a-C1	12-3a-C1-10	1	CAR	12	3a	C1	6	fast-regular	1.003	0.566	0.772
12-3a-C1	12-3a-C1-10	1	DOR	12	3a	C1	6	fast-regular	0.697	0.602	0.158
12-3a-C1	12-3a-C1-10	1	GEN	12	3a	C1	6	fast-regular	0.778	0.765	0.017
12-3a-C1	12-3a-C1-11	1	CIP	12	3a	C1	6	fast-regular	0.952	0.654	0.456
12-3a-C1	12-3a-C1-11	1	CAR	12	3a	C1	6	fast-regular	0.973	0.505	0.927
12-3a-C1	12-3a-C1-11	1	GEN	12	3a	C1	6	fast-regular	0.818	0.798	0.025
12-3a-C1	12-3a-C1-11	1	DOR	12	3a	C1	6	fast-regular	0.65	0.621	0.047
12-3a-C1	12-3a-C1-11	1	CEF	12	3a	C1	6	fast-regular	0.801	0.613	0.307
12-3a-C1	12-3a-C1-12	1	CEF	12	3a	C1	6	fast-regular	0.806	0.613	0.315
12-3a-C1	12-3a-C1-12	1	CAR	12	3a	C1	6	fast-regular	0.934	0.505	0.85
12-3a-C1	12-3a-C1-12	1	DOR	12	3a	C1	6	fast-regular	0.675	0.621	0.087
12-3a-C1	12-3a-C1-12	1	CIP	12	3a	C1	6	fast-regular	0.947	0.654	0.448
12-3a-C1	12-3a-C1-12	1	GEN	12	3a	C1	6	fast-regular	0.794	0.798	-0.005
12-3a-C1	12-3a-C1-13	1	CEF	12	3a	C1	6	fast-regular	0.836	0.613	0.364
12-3a-C1	12-3a-C1-13	1	GEN	12	3a	C1	6	fast-regular	0.762	0.798	-0.045
12-3a-C1	12-3a-C1-13	1	DOR	12	3a	C1	6	fast-regular	0.714	0.621	0.15
12-3a-C1	12-3a-C1-13	1	CAR	12	3a	C1	6	fast-regular	0.978	0.505	0.937
12-3a-C1	12-3a-C1-13	1	CIP	12	3a	C1	6	fast-regular	0.906	0.654	0.385
12-3a-C1	12-3a-C1-14	1	GEN	12	3a	C1	6	fast-regular	0.771	0.798	-0.034
12-3a-C1	12-3a-C1-14	1	DOR	12	3a	C1	6	fast-regular	0.734	0.621	0.182
12-3a-C1	12-3a-C1-14	1	CIP	12	3a	C1	6	fast-regular	0.998	0.654	0.526
12-3a-C1	12-3a-C1-14	1	CAR	12	3a	C1	6	fast-regular	1.006	0.505	0.992
12-3a-C1	12-3a-C1-14	1	CEF	12	3a	C1	6	fast-regular	0.843	0.613	0.375
12-3a-C1	12-3a-C1-15	1	GEN	12	3a	C1	6	fast-regular	0.887	0.798	0.112
12-3a-C1	12-3a-C1-15	1	CEF	12	3a	C1	6	fast-regular	0.834	0.613	0.361
12-3a-C1	12-3a-C1-15	1	DOR	12	3a	C1	6	fast-regular	0.733	0.621	0.18
12-3a-C1	12-3a-C1-15	1	CAR	12	3a	C1	6	fast-regular	1.008	0.505	0.996
12-3a-C1	12-3a-C1-15	1	CIP	12	3a	C1	6	fast-regular	0.998	0.654	0.526
12-3a-C1	12-3a-C1-16	1	GEN	12	3a	C1	6	fast-regular	0.778	0.798	-0.025
12-3a-C1	12-3a-C1-16	1	CAR	12	3a	C1	6	fast-regular	0.952	0.505	0.885
12-3a-C1	12-3a-C1-16	1	CEF	12	3a	C1	6	fast-regular	0.77	0.613	0.256
12-3a-C1	12-3a-C1-16	1	DOR	12	3a	C1	6	fast-regular	0.661	0.621	0.064
12-3a-C1	12-3a-C1-16	1	CIP	12	3a	C1	6	fast-regular	0.974	0.654	0.489
12-3a-C1	12-3a-C1-17	1	CAR	12	3a	C1	6	fast-regular	1.009	0.505	0.998
12-3a-C1	12-3a-C1-17	1	CIP	12	3a	C1	6	fast-regular	0.97	0.654	0.483
12-3a-C1	12-3a-C1-17	1	CEF	12	3a	C1	6	fast-regular	0.834	0.613	0.361
12-3a-C1	12-3a-C1-17	1	DOR	12	3a	C1	6	fast-regular	0.7	0.621	0.127
12-3a-C1	12-3a-C1-17	1	GEN	12	3a	C1	6	fast-regular	0.847	0.798	0.061
12-3a-C1	12-3a-C1-18	1	CAR	12	3a	C1	6	fast-regular	0.992	0.505	0.964
12-3a-C1	12-3a-C1-18	1	CIP	12	3a	C1	6	fast-regular	0.905	0.654	0.384
12-3a-C1	12-3a-C1-18	1	GEN	12	3a	C1	6	fast-regular	0.755	0.798	-0.054
12-3a-C1	12-3a-C1-18	1	DOR	12	3a	C1	6	fast-regular	0.671	0.621	0.081
12-3a-C1	12-3a-C1-18	1	CEF	12	3a	C1	6	fast-regular	0.843	0.613	0.375
12-3a-C1	12-3a-C1-19	1	CIP	12	3a	C1	6	fast-regular	0.888	0.654	0.358
12-3a-C1	12-3a-C1-19	1	CAR	12	3a	C1	6	fast-regular	0.909	0.505	0.8
12-3a-C1	12-3a-C1-19	1	GEN	12	3a	C1	6	fast-regular	0.877	0.798	0.099
12-3a-C1	12-3a-C1-19	1	DOR	12	3a	C1	6	fast-regular	0.675	0.621	0.087
12-3a-C1	12-3a-C1-19	1	CEF	12	3a	C1	6	fast-regular	0.798	0.613	0.302
12-3a-C1	12-3a-C1-2	1	GEN	12	3a	C1	6	fast-regular	0.73	0.765	-0.046
12-3a-C1	12-3a-C1-2	1	DOR	12	3a	C1	6	fast-regular	0.719	0.602	0.194
12-3a-C1	12-3a-C1-2	1	CIP	12	3a	C1	6	fast-regular	0.92	0.643	0.431
12-3a-C1	12-3a-C1-2	1	CAR	12	3a	C1	6	fast-regular	0.966	0.566	0.707
12-3a-C1	12-3a-C1-2	1	CEF	12	3a	C1	6	fast-regular	0.806	0.54	0.493
12-3a-C1	12-3a-C1-20	1	CAR	12	3a	C1	6	fast-regular	0.956	0.505	0.893
12-3a-C1	12-3a-C1-20	1	CIP	12	3a	C1	6	fast-regular	0.898	0.654	0.373
12-3a-C1	12-3a-C1-20	1	CEF	12	3a	C1	6	fast-regular	0.801	0.613	0.307
12-3a-C1	12-3a-C1-20	1	GEN	12	3a	C1	6	fast-regular	0.793	0.798	-0.006
12-3a-C1	12-3a-C1-20	1	DOR	12	3a	C1	6	fast-regular	0.671	0.621	0.081
12-3a-C1	12-3a-C1-3	1	DOR	12	3a	C1	6	fast-regular	0.661	0.602	0.098
12-3a-C1	12-3a-C1-3	1	CIP	12	3a	C1	6	fast-regular	0.951	0.643	0.479
12-3a-C1	12-3a-C1-3	1	CAR	12	3a	C1	6	fast-regular	0.915	0.566	0.617
12-3a-C1	12-3a-C1-3	1	GEN	12	3a	C1	6	fast-regular	0.746	0.765	-0.025
12-3a-C1	12-3a-C1-3	1	CEF	12	3a	C1	6	fast-regular	0.802	0.54	0.485
12-3a-C1	12-3a-C1-4	1	CAR	12	3a	C1	6	fast-regular	0.967	0.566	0.708
12-3a-C1	12-3a-C1-4	1	CEF	12	3a	C1	6	fast-regular	0.817	0.54	0.513
12-3a-C1	12-3a-C1-4	1	DOR	12	3a	C1	6	fast-regular	0.645	0.602	0.071
12-3a-C1	12-3a-C1-4	1	GEN	12	3a	C1	6	fast-regular	0.819	0.765	0.071
12-3a-C1	12-3a-C1-4	1	CIP	12	3a	C1	6	fast-regular	0.914	0.643	0.421
12-3a-C1	12-3a-C1-5	1	CAR	12	3a	C1	6	fast-regular	0.911	0.566	0.61
12-3a-C1	12-3a-C1-5	1	GEN	12	3a	C1	6	fast-regular	0.819	0.765	0.071
12-3a-C1	12-3a-C1-5	1	CIP	12	3a	C1	6	fast-regular	0.969	0.643	0.507
12-3a-C1	12-3a-C1-5	1	DOR	12	3a	C1	6	fast-regular	0.631	0.602	0.048
12-3a-C1	12-3a-C1-5	1	CEF	12	3a	C1	6	fast-regular	0.827	0.54	0.531
12-3a-C1	12-3a-C1-6	1	CIP	12	3a	C1	6	fast-regular	0.887	0.643	0.379
12-3a-C1	12-3a-C1-6	1	CAR	12	3a	C1	6	fast-regular	0.967	0.566	0.708
12-3a-C1	12-3a-C1-6	1	CEF	12	3a	C1	6	fast-regular	0.765	0.54	0.417
12-3a-C1	12-3a-C1-6	1	GEN	12	3a	C1	6	fast-regular	0.705	0.765	-0.078
12-3a-C1	12-3a-C1-6	1	DOR	12	3a	C1	6	fast-regular	0.704	0.602	0.169
12-3a-C1	12-3a-C1-7	1	GEN	12	3a	C1	6	fast-regular	0.796	0.765	0.041
12-3a-C1	12-3a-C1-7	1	CEF	12	3a	C1	6	fast-regular	0.766	0.54	0.419
12-3a-C1	12-3a-C1-7	1	CAR	12	3a	C1	6	fast-regular	0.954	0.566	0.686
12-3a-C1	12-3a-C1-7	1	DOR	12	3a	C1	6	fast-regular	0.665	0.602	0.105
12-3a-C1	12-3a-C1-7	1	CIP	12	3a	C1	6	fast-regular	0.952	0.643	0.481
12-3a-C1	12-3a-C1-8	1	CEF	12	3a	C1	6	fast-regular	0.787	0.54	0.457
12-3a-C1	12-3a-C1-8	1	CIP	12	3a	C1	6	fast-regular	0.917	0.643	0.426
12-3a-C1	12-3a-C1-8	1	GEN	12	3a	C1	6	fast-regular	0.796	0.765	0.041
12-3a-C1	12-3a-C1-8	1	CAR	12	3a	C1	6	fast-regular	0.989	0.566	0.747
12-3a-C1	12-3a-C1-8	1	DOR	12	3a	C1	6	fast-regular	0.755	0.602	0.254
12-3a-C1	12-3a-C1-9	1	CIP	12	3a	C1	6	fast-regular	0.892	0.643	0.387
12-3a-C1	12-3a-C1-9	1	GEN	12	3a	C1	6	fast-regular	0.713	0.765	-0.068
12-3a-C1	12-3a-C1-9	1	CAR	12	3a	C1	6	fast-regular	0.897	0.566	0.585
12-3a-C1	12-3a-C1-9	1	CEF	12	3a	C1	6	fast-regular	0.785	0.54	0.454
12-3a-C1	12-3a-C1-9	1	DOR	12	3a	C1	6	fast-regular	0.691	0.602	0.148
12-3a-C1	12-3a-C1-anc49	anc	GEN	12	3a	C1	6	ancestor	0.723	0.765	-0.055
12-3a-C1	12-3a-C1-anc49	anc	CIP	12	3a	C1	6	ancestor	0.616	0.643	-0.042
12-3a-C1	12-3a-C1-anc49	anc	DOR	12	3a	C1	6	ancestor	0.563	0.602	-0.065
12-3a-C1	12-3a-C1-anc49	anc	CEF	12	3a	C1	6	ancestor	0.545	0.54	0.009
12-3a-C1	12-3a-C1-anc49	anc	CAR	12	3a	C1	6	ancestor	0.537	0.566	-0.051
12-3a-C1	12-3a-C1-anc50	anc	GEN	12	3a	C1	6	ancestor	0.807	0.765	0.055
12-3a-C1	12-3a-C1-anc50	anc	DOR	12	3a	C1	6	ancestor	0.642	0.602	0.066
12-3a-C1	12-3a-C1-anc50	anc	CIP	12	3a	C1	6	ancestor	0.669	0.643	0.04
12-3a-C1	12-3a-C1-anc50	anc	CAR	12	3a	C1	6	ancestor	0.594	0.566	0.049
12-3a-C1	12-3a-C1-anc50	anc	CEF	12	3a	C1	6	ancestor	0.534	0.54	-0.011
12-3a-C1	12-3a-C1-anc51	anc	CIP	12	3a	C1	6	ancestor	0.645	0.654	-0.014
12-3a-C1	12-3a-C1-anc51	anc	CEF	12	3a	C1	6	ancestor	0.569	0.613	-0.072
12-3a-C1	12-3a-C1-anc51	anc	CAR	12	3a	C1	6	ancestor	0.465	0.505	-0.079
12-3a-C1	12-3a-C1-anc51	anc	DOR	12	3a	C1	6	ancestor	0.624	0.621	0.005
12-3a-C1	12-3a-C1-anc51	anc	GEN	12	3a	C1	6	ancestor	0.787	0.798	-0.014
12-3a-C1	12-3a-C1-anc52	anc	GEN	12	3a	C1	6	ancestor	0.808	0.798	0.013
12-3a-C1	12-3a-C1-anc52	anc	DOR	12	3a	C1	6	ancestor	0.619	0.621	-0.003
12-3a-C1	12-3a-C1-anc52	anc	CAR	12	3a	C1	6	ancestor	0.545	0.505	0.079
12-3a-C1	12-3a-C1-anc52	anc	CIP	12	3a	C1	6	ancestor	0.663	0.654	0.014
12-3a-C1	12-3a-C1-anc52	anc	CEF	12	3a	C1	6	ancestor	0.657	0.613	0.072
12-3a-C7	12-3a-C7-1	1	GEN	12	3a	C7	11	random	0.652	0.726	-0.102
12-3a-C7	12-3a-C7-1	1	CAR	12	3a	C7	11	random	0.711	0.595	0.195
12-3a-C7	12-3a-C7-1	1	DOR	12	3a	C7	11	random	1.114	0.693	0.608
12-3a-C7	12-3a-C7-1	1	CIP	12	3a	C7	11	random	0.614	0.606	0.013
12-3a-C7	12-3a-C7-1	1	CEF	12	3a	C7	11	random	0.657	0.464	0.416
12-3a-C7	12-3a-C7-10	1	CEF	12	3a	C7	11	random	0.644	0.464	0.388
12-3a-C7	12-3a-C7-10	1	DOR	12	3a	C7	11	random	1.038	0.693	0.498
12-3a-C7	12-3a-C7-10	1	GEN	12	3a	C7	11	random	0.59	0.726	-0.187
12-3a-C7	12-3a-C7-10	1	CAR	12	3a	C7	11	random	0.68	0.595	0.143
12-3a-C7	12-3a-C7-10	1	CIP	12	3a	C7	11	random	0.586	0.606	-0.033
12-3a-C7	12-3a-C7-11	1	CIP	12	3a	C7	11	random	0.562	0.579	-0.029
12-3a-C7	12-3a-C7-11	1	CAR	12	3a	C7	11	random	0.758	0.617	0.229
12-3a-C7	12-3a-C7-11	1	CEF	12	3a	C7	11	random	0.652	0.478	0.364
12-3a-C7	12-3a-C7-11	1	GEN	12	3a	C7	11	random	0.649	0.766	-0.153
12-3a-C7	12-3a-C7-11	1	DOR	12	3a	C7	11	random	1.02	0.614	0.661
12-3a-C7	12-3a-C7-12	1	CEF	12	3a	C7	11	random	0.62	0.478	0.297
12-3a-C7	12-3a-C7-12	1	DOR	12	3a	C7	11	random	1.057	0.614	0.721
12-3a-C7	12-3a-C7-12	1	GEN	12	3a	C7	11	random	0.575	0.766	-0.249
12-3a-C7	12-3a-C7-12	1	CAR	12	3a	C7	11	random	0.698	0.617	0.131
12-3a-C7	12-3a-C7-12	1	CIP	12	3a	C7	11	random	0.55	0.579	-0.05
12-3a-C7	12-3a-C7-13	1	CAR	12	3a	C7	11	random	0.706	0.617	0.144
12-3a-C7	12-3a-C7-13	1	GEN	12	3a	C7	11	random	0.577	0.766	-0.247
12-3a-C7	12-3a-C7-13	1	CIP	12	3a	C7	11	random	0.579	0.579	0
12-3a-C7	12-3a-C7-13	1	DOR	12	3a	C7	11	random	0.989	0.614	0.611
12-3a-C7	12-3a-C7-13	1	CEF	12	3a	C7	11	random	0.562	0.478	0.176
12-3a-C7	12-3a-C7-14	1	GEN	12	3a	C7	11	random	0.628	0.766	-0.18
12-3a-C7	12-3a-C7-14	1	CIP	12	3a	C7	11	random	0.561	0.579	-0.031
12-3a-C7	12-3a-C7-14	1	CEF	12	3a	C7	11	random	0.589	0.478	0.232
12-3a-C7	12-3a-C7-14	1	CAR	12	3a	C7	11	random	0.807	0.617	0.308
12-3a-C7	12-3a-C7-14	1	DOR	12	3a	C7	11	random	1.07	0.614	0.743
12-3a-C7	12-3a-C7-15	1	CAR	12	3a	C7	11	random	0.782	0.617	0.267
12-3a-C7	12-3a-C7-15	1	DOR	12	3a	C7	11	random	1.02	0.614	0.661
12-3a-C7	12-3a-C7-15	1	CIP	12	3a	C7	11	random	0.548	0.579	-0.054
12-3a-C7	12-3a-C7-15	1	CEF	12	3a	C7	11	random	0.565	0.478	0.182
12-3a-C7	12-3a-C7-15	1	GEN	12	3a	C7	11	random	0.577	0.766	-0.247
12-3a-C7	12-3a-C7-16	1	DOR	12	3a	C7	11	random	1.097	0.614	0.787
12-3a-C7	12-3a-C7-16	1	CAR	12	3a	C7	11	random	0.727	0.617	0.178
12-3a-C7	12-3a-C7-16	1	GEN	12	3a	C7	11	random	0.584	0.766	-0.238
12-3a-C7	12-3a-C7-16	1	CIP	12	3a	C7	11	random	0.553	0.579	-0.045
12-3a-C7	12-3a-C7-16	1	CEF	12	3a	C7	11	random	0.583	0.478	0.22
12-3a-C7	12-3a-C7-17	1	CAR	12	3a	C7	11	random	0.69	0.617	0.118
12-3a-C7	12-3a-C7-17	1	GEN	12	3a	C7	11	random	0.606	0.766	-0.209
12-3a-C7	12-3a-C7-17	1	CIP	12	3a	C7	11	random	0.607	0.579	0.048
12-3a-C7	12-3a-C7-17	1	DOR	12	3a	C7	11	random	1.029	0.614	0.676
12-3a-C7	12-3a-C7-17	1	CEF	12	3a	C7	11	random	0.595	0.478	0.245
12-3a-C7	12-3a-C7-18	1	DOR	12	3a	C7	11	random	1.063	0.614	0.731
12-3a-C7	12-3a-C7-18	1	CAR	12	3a	C7	11	random	0.75	0.617	0.216
12-3a-C7	12-3a-C7-18	1	CEF	12	3a	C7	11	random	0.56	0.478	0.172
12-3a-C7	12-3a-C7-18	1	CIP	12	3a	C7	11	random	0.548	0.579	-0.054
12-3a-C7	12-3a-C7-18	1	GEN	12	3a	C7	11	random	0.622	0.766	-0.188
12-3a-C7	12-3a-C7-19	1	CAR	12	3a	C7	11	random	0.749	0.617	0.214
12-3a-C7	12-3a-C7-19	1	GEN	12	3a	C7	11	random	0.554	0.766	-0.277
12-3a-C7	12-3a-C7-19	1	DOR	12	3a	C7	11	random	1.034	0.614	0.684
12-3a-C7	12-3a-C7-19	1	CIP	12	3a	C7	11	random	0.573	0.579	-0.01
12-3a-C7	12-3a-C7-19	1	CEF	12	3a	C7	11	random	0.594	0.478	0.243
12-3a-C7	12-3a-C7-2	1	CIP	12	3a	C7	11	random	0.584	0.606	-0.036
12-3a-C7	12-3a-C7-2	1	GEN	12	3a	C7	11	random	0.577	0.726	-0.205
12-3a-C7	12-3a-C7-2	1	CAR	12	3a	C7	11	random	0.733	0.595	0.232
12-3a-C7	12-3a-C7-2	1	DOR	12	3a	C7	11	random	1.097	0.693	0.583
12-3a-C7	12-3a-C7-2	1	CEF	12	3a	C7	11	random	0.629	0.464	0.356
12-3a-C7	12-3a-C7-20	1	GEN	12	3a	C7	11	random	0.549	0.766	-0.283
12-3a-C7	12-3a-C7-20	1	CAR	12	3a	C7	11	random	0.663	0.617	0.075
12-3a-C7	12-3a-C7-20	1	DOR	12	3a	C7	11	random	0.971	0.614	0.581
12-3a-C7	12-3a-C7-20	1	CEF	12	3a	C7	11	random	0.572	0.478	0.197
12-3a-C7	12-3a-C7-20	1	CIP	12	3a	C7	11	random	0.598	0.579	0.033
12-3a-C7	12-3a-C7-3	1	DOR	12	3a	C7	11	random	1.015	0.693	0.465
12-3a-C7	12-3a-C7-3	1	CAR	12	3a	C7	11	random	0.696	0.595	0.17
12-3a-C7	12-3a-C7-3	1	CIP	12	3a	C7	11	random	0.557	0.606	-0.081
12-3a-C7	12-3a-C7-3	1	GEN	12	3a	C7	11	random	0.591	0.726	-0.186
12-3a-C7	12-3a-C7-3	1	CEF	12	3a	C7	11	random	0.573	0.464	0.235
12-3a-C7	12-3a-C7-4	1	GEN	12	3a	C7	11	random	0.573	0.726	-0.211
12-3a-C7	12-3a-C7-4	1	CEF	12	3a	C7	11	random	0.573	0.464	0.235
12-3a-C7	12-3a-C7-4	1	DOR	12	3a	C7	11	random	1.038	0.693	0.498
12-3a-C7	12-3a-C7-4	1	CIP	12	3a	C7	11	random	0.618	0.606	0.02
12-3a-C7	12-3a-C7-4	1	CAR	12	3a	C7	11	random	0.794	0.595	0.334
12-3a-C7	12-3a-C7-5	1	CEF	12	3a	C7	11	random	0.611	0.464	0.317
12-3a-C7	12-3a-C7-5	1	CIP	12	3a	C7	11	random	0.573	0.606	-0.054
12-3a-C7	12-3a-C7-5	1	DOR	12	3a	C7	11	random	1.052	0.693	0.518
12-3a-C7	12-3a-C7-5	1	CAR	12	3a	C7	11	random	0.701	0.595	0.178
12-3a-C7	12-3a-C7-5	1	GEN	12	3a	C7	11	random	0.583	0.726	-0.197
12-3a-C7	12-3a-C7-6	1	CAR	12	3a	C7	11	random	0.672	0.595	0.129
12-3a-C7	12-3a-C7-6	1	GEN	12	3a	C7	11	random	0.57	0.726	-0.215
12-3a-C7	12-3a-C7-6	1	DOR	12	3a	C7	11	random	1.057	0.693	0.525
12-3a-C7	12-3a-C7-6	1	CEF	12	3a	C7	11	random	0.588	0.464	0.267
12-3a-C7	12-3a-C7-6	1	CIP	12	3a	C7	11	random	0.56	0.606	-0.076
12-3a-C7	12-3a-C7-7	1	GEN	12	3a	C7	11	random	0.602	0.726	-0.171
12-3a-C7	12-3a-C7-7	1	DOR	12	3a	C7	11	random	1.126	0.693	0.625
12-3a-C7	12-3a-C7-7	1	CIP	12	3a	C7	11	random	0.577	0.606	-0.048
12-3a-C7	12-3a-C7-7	1	CEF	12	3a	C7	11	random	0.594	0.464	0.28
12-3a-C7	12-3a-C7-7	1	CAR	12	3a	C7	11	random	0.781	0.595	0.313
12-3a-C7	12-3a-C7-8	1	CAR	12	3a	C7	11	random	0.617	0.595	0.037
12-3a-C7	12-3a-C7-8	1	CIP	12	3a	C7	11	random	0.56	0.606	-0.076
12-3a-C7	12-3a-C7-8	1	CEF	12	3a	C7	11	random	0.559	0.464	0.205
12-3a-C7	12-3a-C7-8	1	GEN	12	3a	C7	11	random	0.726	0.726	0
12-3a-C7	12-3a-C7-8	1	DOR	12	3a	C7	11	random	0.994	0.693	0.434
12-3a-C7	12-3a-C7-9	1	CEF	12	3a	C7	11	random	0.619	0.464	0.334
12-3a-C7	12-3a-C7-9	1	GEN	12	3a	C7	11	random	0.798	0.976	-0.182
12-3a-C7	12-3a-C7-9	1	DOR	12	3a	C7	11	random	1.041	0.693	0.502
12-3a-C7	12-3a-C7-9	1	CAR	12	3a	C7	11	random	0.779	0.595	0.309
12-3a-C7	12-3a-C7-9	1	CIP	12	3a	C7	11	random	0.604	0.606	-0.003
12-3a-C7	12-3a-C7-anc93	anc	GEN	12	3a	C7	11	ancestor	0.69	0.726	-0.05
12-3a-C7	12-3a-C7-anc93	anc	CIP	12	3a	C7	11	ancestor	0.579	0.606	-0.045
12-3a-C7	12-3a-C7-anc93	anc	CEF	12	3a	C7	11	ancestor	0.492	0.464	0.06
12-3a-C7	12-3a-C7-anc93	anc	DOR	12	3a	C7	11	ancestor	0.682	0.693	-0.016
12-3a-C7	12-3a-C7-anc93	anc	CAR	12	3a	C7	11	ancestor	0.604	0.595	0.015
12-3a-C7	12-3a-C7-anc94	anc	CEF	12	3a	C7	11	ancestor	0.436	0.464	-0.06
12-3a-C7	12-3a-C7-anc94	anc	DOR	12	3a	C7	11	ancestor	0.704	0.693	0.016
12-3a-C7	12-3a-C7-anc94	anc	CIP	12	3a	C7	11	ancestor	0.634	0.606	0.046
12-3a-C7	12-3a-C7-anc94	anc	CAR	12	3a	C7	11	ancestor	0.587	0.595	-0.013
12-3a-C7	12-3a-C7-anc94	anc	GEN	12	3a	C7	11	ancestor	0.762	0.726	0.05
12-3a-C7	12-3a-C7-anc95	anc	CAR	12	3a	C7	11	ancestor	0.635	0.617	0.029
12-3a-C7	12-3a-C7-anc95	anc	GEN	12	3a	C7	11	ancestor	0.729	0.766	-0.048
12-3a-C7	12-3a-C7-anc95	anc	CIP	12	3a	C7	11	ancestor	0.594	0.579	0.026
12-3a-C7	12-3a-C7-anc95	anc	CEF	12	3a	C7	11	ancestor	0.516	0.478	0.079
12-3a-C7	12-3a-C7-anc95	anc	DOR	12	3a	C7	11	ancestor	0.633	0.614	0.031
12-3a-C7	12-3a-C7-anc96	anc	DOR	12	3a	C7	11	ancestor	0.595	0.614	-0.031
12-3a-C7	12-3a-C7-anc96	anc	CIP	12	3a	C7	11	ancestor	0.565	0.579	-0.024
12-3a-C7	12-3a-C7-anc96	anc	GEN	12	3a	C7	11	ancestor	0.803	0.766	0.048
12-3a-C7	12-3a-C7-anc96	anc	CEF	12	3a	C7	11	ancestor	0.439	0.478	-0.082
12-3a-C7	12-3a-C7-anc96	anc	CAR	12	3a	C7	11	ancestor	0.6	0.617	-0.028
12-3a-D1	12-3a-D1-1	1	CEF	12	3a	D1	14	random	0.941	0.602	0.563
12-3a-D1	12-3a-D1-1	1	GEN	12	3a	D1	14	random	0.758	0.833	-0.09
12-3a-D1	12-3a-D1-1	1	CIP	12	3a	D1	14	random	0.68	0.674	0.009
12-3a-D1	12-3a-D1-1	1	CAR	12	3a	D1	14	random	0.745	0.541	0.377
12-3a-D1	12-3a-D1-1	1	DOR	12	3a	D1	14	random	1.237	0.856	0.445
12-3a-D1	12-3a-D1-10	1	CIP	12	3a	D1	14	random	0.645	0.674	-0.043
12-3a-D1	12-3a-D1-10	1	DOR	12	3a	D1	14	random	1.279	0.856	0.494
12-3a-D1	12-3a-D1-10	1	CAR	12	3a	D1	14	random	0.827	0.541	0.529
12-3a-D1	12-3a-D1-10	1	GEN	12	3a	D1	14	random	0.67	0.833	-0.196
12-3a-D1	12-3a-D1-10	1	CEF	12	3a	D1	14	random	0.736	0.602	0.223
12-3a-D1	12-3a-D1-11	1	CAR	12	3a	D1	14	random	0.849	0.62	0.369
12-3a-D1	12-3a-D1-11	1	GEN	12	3a	D1	14	random	0.866	0.933	-0.072
12-3a-D1	12-3a-D1-11	1	CEF	12	3a	D1	14	random	0.984	0.671	0.466
12-3a-D1	12-3a-D1-11	1	CIP	12	3a	D1	14	random	0.602	0.609	-0.011
12-3a-D1	12-3a-D1-11	1	DOR	12	3a	D1	14	random	1.204	0.74	0.627
12-3a-D1	12-3a-D1-12	1	GEN	12	3a	D1	14	random	0.859	0.933	-0.079
12-3a-D1	12-3a-D1-12	1	CEF	12	3a	D1	14	random	0.755	0.671	0.125
12-3a-D1	12-3a-D1-12	1	CAR	12	3a	D1	14	random	0.798	0.62	0.287
12-3a-D1	12-3a-D1-12	1	DOR	12	3a	D1	14	random	1.169	0.74	0.58
12-3a-D1	12-3a-D1-12	1	CIP	12	3a	D1	14	random	0.615	0.609	0.01
12-3a-D1	12-3a-D1-13	1	CIP	12	3a	D1	14	random	0.596	0.609	-0.021
12-3a-D1	12-3a-D1-13	1	CAR	12	3a	D1	14	random	0.823	0.62	0.327
12-3a-D1	12-3a-D1-13	1	CEF	12	3a	D1	14	random	0.866	0.671	0.291
12-3a-D1	12-3a-D1-13	1	DOR	12	3a	D1	14	random	1.241	0.74	0.677
12-3a-D1	12-3a-D1-13	1	GEN	12	3a	D1	14	random	0.796	0.933	-0.147
12-3a-D1	12-3a-D1-14	1	CAR	12	3a	D1	14	random	0.843	0.62	0.36
12-3a-D1	12-3a-D1-14	1	GEN	12	3a	D1	14	random	0.842	0.933	-0.098
12-3a-D1	12-3a-D1-14	1	CIP	12	3a	D1	14	random	0.665	0.609	0.092
12-3a-D1	12-3a-D1-14	1	CEF	12	3a	D1	14	random	0.893	0.671	0.331
12-3a-D1	12-3a-D1-14	1	DOR	12	3a	D1	14	random	1.346	0.74	0.819
12-3a-D1	12-3a-D1-15	1	CIP	12	3a	D1	14	random	0.604	0.609	-0.008
12-3a-D1	12-3a-D1-15	1	GEN	12	3a	D1	14	random	0.826	0.933	-0.115
12-3a-D1	12-3a-D1-15	1	CEF	12	3a	D1	14	random	0.934	0.671	0.392
12-3a-D1	12-3a-D1-15	1	DOR	12	3a	D1	14	random	1.299	0.74	0.755
12-3a-D1	12-3a-D1-15	1	CAR	12	3a	D1	14	random	0.921	0.62	0.485
12-3a-D1	12-3a-D1-16	1	CEF	12	3a	D1	14	random	0.806	0.671	0.201
12-3a-D1	12-3a-D1-16	1	GEN	12	3a	D1	14	random	0.805	0.933	-0.137
12-3a-D1	12-3a-D1-16	1	DOR	12	3a	D1	14	random	1.205	0.74	0.628
12-3a-D1	12-3a-D1-16	1	CAR	12	3a	D1	14	random	0.759	0.62	0.224
12-3a-D1	12-3a-D1-16	1	CIP	12	3a	D1	14	random	0.604	0.609	-0.008
12-3a-D1	12-3a-D1-17	1	CEF	12	3a	D1	14	random	0.821	0.671	0.224
12-3a-D1	12-3a-D1-17	1	GEN	12	3a	D1	14	random	0.775	0.933	-0.169
12-3a-D1	12-3a-D1-17	1	CIP	12	3a	D1	14	random	0.639	0.609	0.049
12-3a-D1	12-3a-D1-17	1	DOR	12	3a	D1	14	random	1.28	0.74	0.73
12-3a-D1	12-3a-D1-17	1	CAR	12	3a	D1	14	random	0.874	0.62	0.41
12-3a-D1	12-3a-D1-18	1	DOR	12	3a	D1	14	random	1.204	0.74	0.627
12-3a-D1	12-3a-D1-18	1	CEF	12	3a	D1	14	random	0.801	0.671	0.194
12-3a-D1	12-3a-D1-18	1	CIP	12	3a	D1	14	random	0.625	0.609	0.026
12-3a-D1	12-3a-D1-18	1	GEN	12	3a	D1	14	random	0.858	0.933	-0.08
12-3a-D1	12-3a-D1-18	1	CAR	12	3a	D1	14	random	0.826	0.62	0.332
12-3a-D1	12-3a-D1-19	1	GEN	12	3a	D1	14	random	0.982	0.933	0.053
12-3a-D1	12-3a-D1-19	1	DOR	12	3a	D1	14	random	1.251	0.74	0.691
12-3a-D1	12-3a-D1-19	1	CIP	12	3a	D1	14	random	0.601	0.609	-0.013
12-3a-D1	12-3a-D1-19	1	CAR	12	3a	D1	14	random	0.813	0.62	0.311
12-3a-D1	12-3a-D1-19	1	CEF	12	3a	D1	14	random	0.836	0.671	0.246
12-3a-D1	12-3a-D1-2	1	CEF	12	3a	D1	14	random	0.866	0.602	0.439
12-3a-D1	12-3a-D1-2	1	GEN	12	3a	D1	14	random	0.849	0.833	0.019
12-3a-D1	12-3a-D1-2	1	DOR	12	3a	D1	14	random	1.259	0.856	0.471
12-3a-D1	12-3a-D1-2	1	CIP	12	3a	D1	14	random	0.631	0.674	-0.064
12-3a-D1	12-3a-D1-2	1	CAR	12	3a	D1	14	random	0.767	0.541	0.418
12-3a-D1	12-3a-D1-20	1	GEN	12	3a	D1	14	random	0.754	0.933	-0.192
12-3a-D1	12-3a-D1-20	1	CIP	12	3a	D1	14	random	0.581	0.609	-0.046
12-3a-D1	12-3a-D1-20	1	DOR	12	3a	D1	14	random	1.331	0.74	0.799
12-3a-D1	12-3a-D1-20	1	CEF	12	3a	D1	14	random	0.79	0.671	0.177
12-3a-D1	12-3a-D1-20	1	CAR	12	3a	D1	14	random	0.837	0.62	0.35
12-3a-D1	12-3a-D1-3	1	CAR	12	3a	D1	14	random	0.834	0.541	0.542
12-3a-D1	12-3a-D1-3	1	DOR	12	3a	D1	14	random	1.409	0.856	0.646
12-3a-D1	12-3a-D1-3	1	GEN	12	3a	D1	14	random	0.838	0.833	0.006
12-3a-D1	12-3a-D1-3	1	CEF	12	3a	D1	14	random	0.877	0.602	0.457
12-3a-D1	12-3a-D1-3	1	CIP	12	3a	D1	14	random	0.705	0.674	0.046
12-3a-D1	12-3a-D1-4	1	CEF	12	3a	D1	14	random	0.879	0.602	0.46
12-3a-D1	12-3a-D1-4	1	GEN	12	3a	D1	14	random	0.843	0.833	0.012
12-3a-D1	12-3a-D1-4	1	DOR	12	3a	D1	14	random	1.351	0.856	0.578
12-3a-D1	12-3a-D1-4	1	CIP	12	3a	D1	14	random	0.618	0.674	-0.083
12-3a-D1	12-3a-D1-4	1	CAR	12	3a	D1	14	random	0.825	0.541	0.525
12-3a-D1	12-3a-D1-5	1	CIP	12	3a	D1	14	random	0.619	0.674	-0.082
12-3a-D1	12-3a-D1-5	1	DOR	12	3a	D1	14	random	1.364	0.856	0.593
12-3a-D1	12-3a-D1-5	1	CAR	12	3a	D1	14	random	0.829	0.541	0.532
12-3a-D1	12-3a-D1-5	1	CEF	12	3a	D1	14	random	0.854	0.602	0.419
12-3a-D1	12-3a-D1-5	1	GEN	12	3a	D1	14	random	0.819	0.833	-0.017
12-3a-D1	12-3a-D1-6	1	DOR	12	3a	D1	14	random	1.291	0.856	0.508
12-3a-D1	12-3a-D1-6	1	CEF	12	3a	D1	14	random	0.749	0.602	0.244
12-3a-D1	12-3a-D1-6	1	CAR	12	3a	D1	14	random	0.795	0.541	0.47
12-3a-D1	12-3a-D1-6	1	CIP	12	3a	D1	14	random	0.604	0.674	-0.104
12-3a-D1	12-3a-D1-6	1	GEN	12	3a	D1	14	random	0.804	0.833	-0.035
12-3a-D1	12-3a-D1-7	1	CEF	12	3a	D1	14	random	0.771	0.602	0.281
12-3a-D1	12-3a-D1-7	1	CIP	12	3a	D1	14	random	0.604	0.674	-0.104
12-3a-D1	12-3a-D1-7	1	GEN	12	3a	D1	14	random	0.711	0.833	-0.146
12-3a-D1	12-3a-D1-7	1	CAR	12	3a	D1	14	random	0.864	0.541	0.597
12-3a-D1	12-3a-D1-7	1	DOR	12	3a	D1	14	random	1.312	0.856	0.533
12-3a-D1	12-3a-D1-8	1	GEN	12	3a	D1	14	random	0.743	0.833	-0.108
12-3a-D1	12-3a-D1-8	1	CIP	12	3a	D1	14	random	0.687	0.674	0.019
12-3a-D1	12-3a-D1-8	1	DOR	12	3a	D1	14	random	1.26	0.856	0.472
12-3a-D1	12-3a-D1-8	1	CEF	12	3a	D1	14	random	0.767	0.602	0.274
12-3a-D1	12-3a-D1-8	1	CAR	12	3a	D1	14	random	0.885	0.541	0.636
12-3a-D1	12-3a-D1-9	1	GEN	12	3a	D1	14	random	0.86	0.833	0.032
12-3a-D1	12-3a-D1-9	1	CIP	12	3a	D1	14	random	0.624	0.674	-0.074
12-3a-D1	12-3a-D1-9	1	CAR	12	3a	D1	14	random	0.804	0.541	0.486
12-3a-D1	12-3a-D1-9	1	DOR	12	3a	D1	14	random	1.288	0.856	0.505
12-3a-D1	12-3a-D1-9	1	CEF	12	3a	D1	14	random	0.821	0.602	0.364
12-3a-D1	12-3a-D1-anc81	anc	CEF	12	3a	D1	14	ancestor	0.636	0.602	0.056
12-3a-D1	12-3a-D1-anc81	anc	CAR	12	3a	D1	14	ancestor	0.518	0.541	-0.043
12-3a-D1	12-3a-D1-anc81	anc	CIP	12	3a	D1	14	ancestor	0.647	0.674	-0.04
12-3a-D1	12-3a-D1-anc81	anc	DOR	12	3a	D1	14	ancestor	0.819	0.856	-0.043
12-3a-D1	12-3a-D1-anc82	anc	CIP	12	3a	D1	14	ancestor	0.7	0.674	0.039
12-3a-D1	12-3a-D1-anc82	anc	GEN	12	3a	D1	14	ancestor	0.833	0.833	0
12-3a-D1	12-3a-D1-anc82	anc	CAR	12	3a	D1	14	ancestor	0.564	0.541	0.043
12-3a-D1	12-3a-D1-anc82	anc	CEF	12	3a	D1	14	ancestor	0.568	0.602	-0.056
12-3a-D1	12-3a-D1-anc82	anc	DOR	12	3a	D1	14	ancestor	0.894	0.856	0.044
12-3a-D1	12-3a-D1-anc83	anc	DOR	12	3a	D1	14	ancestor	0.675	0.74	-0.088
12-3a-D1	12-3a-D1-anc83	anc	CAR	12	3a	D1	14	ancestor	0.621	0.62	0.002
12-3a-D1	12-3a-D1-anc83	anc	CIP	12	3a	D1	14	ancestor	0.575	0.609	-0.056
12-3a-D1	12-3a-D1-anc83	anc	GEN	12	3a	D1	14	ancestor	0.965	0.933	0.034
12-3a-D1	12-3a-D1-anc83	anc	CEF	12	3a	D1	14	ancestor	0.714	0.671	0.064
12-3a-D1	12-3a-D1-anc84	anc	CEF	12	3a	D1	14	ancestor	0.628	0.671	-0.064
12-3a-D1	12-3a-D1-anc84	anc	GEN	12	3a	D1	14	ancestor	0.901	0.933	-0.034
12-3a-D1	12-3a-D1-anc84	anc	DOR	12	3a	D1	14	ancestor	0.804	0.74	0.086
12-3a-D1	12-3a-D1-anc84	anc	CAR	12	3a	D1	14	ancestor	0.62	0.62	0
12-3a-D1	12-3a-D1-anc84	anc	CIP	12	3a	D1	14	ancestor	0.644	0.609	0.057
12-3a-D7	12-3a-D7-1	1	DOR	12	3a	D7	5	fast-regular	1.175	0.66	0.78
12-3a-D7	12-3a-D7-1	1	CEF	12	3a	D7	5	fast-regular	0.849	0.6	0.415
12-3a-D7	12-3a-D7-1	1	CIP	12	3a	D7	5	fast-regular	0.593	0.606	-0.021
12-3a-D7	12-3a-D7-1	1	CAR	12	3a	D7	5	fast-regular	0.753	0.541	0.392
12-3a-D7	12-3a-D7-1	1	GEN	12	3a	D7	5	fast-regular	0.926	0.91	0.018
12-3a-D7	12-3a-D7-10	1	CEF	12	3a	D7	5	fast-regular	0.838	0.6	0.397
12-3a-D7	12-3a-D7-10	1	CIP	12	3a	D7	5	fast-regular	0.612	0.606	0.01
12-3a-D7	12-3a-D7-10	1	DOR	12	3a	D7	5	fast-regular	1.254	0.66	0.9
12-3a-D7	12-3a-D7-10	1	GEN	12	3a	D7	5	fast-regular	0.837	0.91	-0.08
12-3a-D7	12-3a-D7-10	1	CAR	12	3a	D7	5	fast-regular	0.657	0.541	0.214
12-3a-D7	12-3a-D7-11	1	DOR	12	3a	D7	5	fast-regular	1.144	0.709	0.614
12-3a-D7	12-3a-D7-11	1	CAR	12	3a	D7	5	fast-regular	0.647	0.484	0.337
12-3a-D7	12-3a-D7-11	1	CIP	12	3a	D7	5	fast-regular	0.545	0.524	0.04
12-3a-D7	12-3a-D7-11	1	CEF	12	3a	D7	5	fast-regular	0.826	0.64	0.291
12-3a-D7	12-3a-D7-11	1	GEN	12	3a	D7	5	fast-regular	0.838	0.95	-0.118
12-3a-D7	12-3a-D7-12	1	DOR	12	3a	D7	5	fast-regular	1.116	0.709	0.574
12-3a-D7	12-3a-D7-12	1	CEF	12	3a	D7	5	fast-regular	0.821	0.64	0.283
12-3a-D7	12-3a-D7-12	1	GEN	12	3a	D7	5	fast-regular	0.851	0.95	-0.104
12-3a-D7	12-3a-D7-12	1	CAR	12	3a	D7	5	fast-regular	0.703	0.484	0.452
12-3a-D7	12-3a-D7-12	1	CIP	12	3a	D7	5	fast-regular	0.544	0.524	0.038
12-3a-D7	12-3a-D7-13	1	GEN	12	3a	D7	5	fast-regular	0.849	0.95	-0.106
12-3a-D7	12-3a-D7-13	1	DOR	12	3a	D7	5	fast-regular	1.145	0.709	0.615
12-3a-D7	12-3a-D7-13	1	CEF	12	3a	D7	5	fast-regular	0.818	0.64	0.278
12-3a-D7	12-3a-D7-13	1	CIP	12	3a	D7	5	fast-regular	0.544	0.524	0.038
12-3a-D7	12-3a-D7-13	1	CAR	12	3a	D7	5	fast-regular	0.681	0.484	0.407
12-3a-D7	12-3a-D7-14	1	DOR	12	3a	D7	5	fast-regular	1.193	0.709	0.683
12-3a-D7	12-3a-D7-14	1	CIP	12	3a	D7	5	fast-regular	0.571	0.524	0.09
12-3a-D7	12-3a-D7-14	1	CEF	12	3a	D7	5	fast-regular	0.814	0.64	0.272
12-3a-D7	12-3a-D7-14	1	GEN	12	3a	D7	5	fast-regular	0.863	0.95	-0.092
12-3a-D7	12-3a-D7-14	1	CAR	12	3a	D7	5	fast-regular	0.729	0.484	0.506
12-3a-D7	12-3a-D7-15	1	CIP	12	3a	D7	5	fast-regular	0.565	0.524	0.078
12-3a-D7	12-3a-D7-15	1	DOR	12	3a	D7	5	fast-regular	1.149	0.709	0.621
12-3a-D7	12-3a-D7-15	1	CAR	12	3a	D7	5	fast-regular	0.692	0.484	0.43
12-3a-D7	12-3a-D7-15	1	CEF	12	3a	D7	5	fast-regular	0.926	0.64	0.447
12-3a-D7	12-3a-D7-15	1	GEN	12	3a	D7	5	fast-regular	0.84	0.95	-0.116
12-3a-D7	12-3a-D7-16	1	DOR	12	3a	D7	5	fast-regular	1.136	0.709	0.602
12-3a-D7	12-3a-D7-16	1	CAR	12	3a	D7	5	fast-regular	0.686	0.484	0.417
12-3a-D7	12-3a-D7-16	1	CEF	12	3a	D7	5	fast-regular	0.723	0.64	0.13
12-3a-D7	12-3a-D7-16	1	CIP	12	3a	D7	5	fast-regular	0.538	0.524	0.027
12-3a-D7	12-3a-D7-16	1	GEN	12	3a	D7	5	fast-regular	0.908	0.95	-0.044
12-3a-D7	12-3a-D7-17	1	CAR	12	3a	D7	5	fast-regular	0.62	0.484	0.281
12-3a-D7	12-3a-D7-17	1	CEF	12	3a	D7	5	fast-regular	0.803	0.64	0.255
12-3a-D7	12-3a-D7-17	1	CIP	12	3a	D7	5	fast-regular	0.533	0.524	0.017
12-3a-D7	12-3a-D7-17	1	GEN	12	3a	D7	5	fast-regular	0.8	0.95	-0.158
12-3a-D7	12-3a-D7-17	1	DOR	12	3a	D7	5	fast-regular	1.137	0.709	0.604
12-3a-D7	12-3a-D7-18	1	GEN	12	3a	D7	5	fast-regular	0.827	0.95	-0.129
12-3a-D7	12-3a-D7-18	1	CAR	12	3a	D7	5	fast-regular	0.642	0.484	0.326
12-3a-D7	12-3a-D7-18	1	CIP	12	3a	D7	5	fast-regular	0.568	0.524	0.084
12-3a-D7	12-3a-D7-18	1	DOR	12	3a	D7	5	fast-regular	1.152	0.709	0.625
12-3a-D7	12-3a-D7-18	1	CEF	12	3a	D7	5	fast-regular	0.776	0.64	0.212
12-3a-D7	12-3a-D7-19	1	CEF	12	3a	D7	5	fast-regular	0.823	0.64	0.286
12-3a-D7	12-3a-D7-19	1	CAR	12	3a	D7	5	fast-regular	0.611	0.484	0.262
12-3a-D7	12-3a-D7-19	1	DOR	12	3a	D7	5	fast-regular	1.131	0.709	0.595
12-3a-D7	12-3a-D7-19	1	GEN	12	3a	D7	5	fast-regular	0.756	0.95	-0.204
12-3a-D7	12-3a-D7-19	1	CIP	12	3a	D7	5	fast-regular	0.556	0.524	0.061
12-3a-D7	12-3a-D7-2	1	GEN	12	3a	D7	5	fast-regular	0.866	0.91	-0.048
12-3a-D7	12-3a-D7-2	1	DOR	12	3a	D7	5	fast-regular	1.144	0.66	0.733
12-3a-D7	12-3a-D7-2	1	CEF	12	3a	D7	5	fast-regular	0.764	0.6	0.273
12-3a-D7	12-3a-D7-2	1	CIP	12	3a	D7	5	fast-regular	0.597	0.606	-0.015
12-3a-D7	12-3a-D7-2	1	CAR	12	3a	D7	5	fast-regular	0.711	0.541	0.314
12-3a-D7	12-3a-D7-20	1	DOR	12	3a	D7	5	fast-regular	1.173	0.709	0.654
12-3a-D7	12-3a-D7-20	1	CEF	12	3a	D7	5	fast-regular	0.732	0.64	0.144
12-3a-D7	12-3a-D7-20	1	GEN	12	3a	D7	5	fast-regular	0.79	0.95	-0.168
12-3a-D7	12-3a-D7-20	1	CAR	12	3a	D7	5	fast-regular	0.613	0.484	0.267
12-3a-D7	12-3a-D7-20	1	CIP	12	3a	D7	5	fast-regular	0.519	0.524	-0.01
12-3a-D7	12-3a-D7-3	1	DOR	12	3a	D7	5	fast-regular	1.182	0.66	0.791
12-3a-D7	12-3a-D7-3	1	CEF	12	3a	D7	5	fast-regular	0.839	0.6	0.398
12-3a-D7	12-3a-D7-3	1	CIP	12	3a	D7	5	fast-regular	0.646	0.606	0.066
12-3a-D7	12-3a-D7-3	1	CAR	12	3a	D7	5	fast-regular	0.717	0.541	0.325
12-3a-D7	12-3a-D7-3	1	GEN	12	3a	D7	5	fast-regular	0.838	0.91	-0.079
12-3a-D7	12-3a-D7-4	1	CAR	12	3a	D7	5	fast-regular	0.749	0.541	0.384
12-3a-D7	12-3a-D7-4	1	CEF	12	3a	D7	5	fast-regular	0.954	0.6	0.59
12-3a-D7	12-3a-D7-4	1	CIP	12	3a	D7	5	fast-regular	0.623	0.606	0.028
12-3a-D7	12-3a-D7-4	1	GEN	12	3a	D7	5	fast-regular	0.853	0.91	-0.063
12-3a-D7	12-3a-D7-4	1	DOR	12	3a	D7	5	fast-regular	1.222	0.66	0.852
12-3a-D7	12-3a-D7-5	1	CAR	12	3a	D7	5	fast-regular	0.758	0.541	0.401
12-3a-D7	12-3a-D7-5	1	DOR	12	3a	D7	5	fast-regular	1.133	0.66	0.717
12-3a-D7	12-3a-D7-5	1	CIP	12	3a	D7	5	fast-regular	0.626	0.606	0.033
12-3a-D7	12-3a-D7-5	1	CEF	12	3a	D7	5	fast-regular	0.845	0.6	0.408
12-3a-D7	12-3a-D7-5	1	GEN	12	3a	D7	5	fast-regular	0.849	0.91	-0.067
12-3a-D7	12-3a-D7-6	1	DOR	12	3a	D7	5	fast-regular	1.164	0.66	0.764
12-3a-D7	12-3a-D7-6	1	CAR	12	3a	D7	5	fast-regular	0.712	0.541	0.316
12-3a-D7	12-3a-D7-6	1	CIP	12	3a	D7	5	fast-regular	0.625	0.606	0.031
12-3a-D7	12-3a-D7-6	1	CEF	12	3a	D7	5	fast-regular	0.923	0.6	0.538
12-3a-D7	12-3a-D7-6	1	GEN	12	3a	D7	5	fast-regular	0.846	0.91	-0.07
12-3a-D7	12-3a-D7-7	1	CAR	12	3a	D7	5	fast-regular	0.789	0.541	0.458
12-3a-D7	12-3a-D7-7	1	CEF	12	3a	D7	5	fast-regular	0.881	0.6	0.468
12-3a-D7	12-3a-D7-7	1	DOR	12	3a	D7	5	fast-regular	1.175	0.66	0.78
12-3a-D7	12-3a-D7-7	1	CIP	12	3a	D7	5	fast-regular	0.597	0.606	-0.015
12-3a-D7	12-3a-D7-7	1	GEN	12	3a	D7	5	fast-regular	0.783	0.91	-0.14
12-3a-D7	12-3a-D7-8	1	GEN	12	3a	D7	5	fast-regular	0.801	0.91	-0.12
12-3a-D7	12-3a-D7-8	1	CAR	12	3a	D7	5	fast-regular	0.79	0.541	0.46
12-3a-D7	12-3a-D7-8	1	DOR	12	3a	D7	5	fast-regular	1.275	0.66	0.932
12-3a-D7	12-3a-D7-8	1	CEF	12	3a	D7	5	fast-regular	0.809	0.6	0.348
12-3a-D7	12-3a-D7-8	1	CIP	12	3a	D7	5	fast-regular	0.662	0.606	0.092
12-3a-D7	12-3a-D7-9	1	CIP	12	3a	D7	5	fast-regular	0.583	0.606	-0.038
12-3a-D7	12-3a-D7-9	1	CEF	12	3a	D7	5	fast-regular	0.748	0.6	0.247
12-3a-D7	12-3a-D7-9	1	GEN	12	3a	D7	5	fast-regular	0.764	0.91	-0.16
12-3a-D7	12-3a-D7-9	1	CAR	12	3a	D7	5	fast-regular	0.724	0.541	0.338
12-3a-D7	12-3a-D7-9	1	DOR	12	3a	D7	5	fast-regular	1.186	0.66	0.797
12-3a-D7	12-3a-D7-anc61	anc	GEN	12	3a	D7	5	ancestor	0.954	0.91	0.048
12-3a-D7	12-3a-D7-anc61	anc	CAR	12	3a	D7	5	ancestor	0.541	0.541	0
12-3a-D7	12-3a-D7-anc61	anc	CIP	12	3a	D7	5	ancestor	0.64	0.606	0.056
12-3a-D7	12-3a-D7-anc61	anc	DOR	12	3a	D7	5	ancestor	0.631	0.66	-0.044
12-3a-D7	12-3a-D7-anc61	anc	CEF	12	3a	D7	5	ancestor	0.646	0.6	0.077
12-3a-D7	12-3a-D7-anc62	anc	CAR	12	3a	D7	5	ancestor	0.541	0.541	0
12-3a-D7	12-3a-D7-anc62	anc	CIP	12	3a	D7	5	ancestor	0.573	0.606	-0.054
12-3a-D7	12-3a-D7-anc62	anc	CEF	12	3a	D7	5	ancestor	0.554	0.6	-0.077
12-3a-D7	12-3a-D7-anc62	anc	GEN	12	3a	D7	5	ancestor	0.865	0.91	-0.049
12-3a-D7	12-3a-D7-anc62	anc	DOR	12	3a	D7	5	ancestor	0.69	0.66	0.045
12-3a-D7	12-3a-D7-anc63	anc	CEF	12	3a	D7	5	ancestor	0.695	0.64	0.086
12-3a-D7	12-3a-D7-anc63	anc	GEN	12	3a	D7	5	ancestor	0.992	0.95	0.044
12-3a-D7	12-3a-D7-anc63	anc	DOR	12	3a	D7	5	ancestor	0.668	0.709	-0.058
12-3a-D7	12-3a-D7-anc63	anc	CAR	12	3a	D7	5	ancestor	0.486	0.484	0.004
12-3a-D7	12-3a-D7-anc63	anc	CIP	12	3a	D7	5	ancestor	0.521	0.524	-0.006
12-3a-D7	12-3a-D7-anc64	anc	DOR	12	3a	D7	5	ancestor	0.75	0.709	0.058
12-3a-D7	12-3a-D7-anc64	anc	GEN	12	3a	D7	5	ancestor	0.908	0.95	-0.044
12-3a-D7	12-3a-D7-anc64	anc	CAR	12	3a	D7	5	ancestor	0.481	0.484	-0.006
12-3a-D7	12-3a-D7-anc64	anc	CIP	12	3a	D7	5	ancestor	0.526	0.524	0.004
12-3a-D7	12-3a-D7-anc64	anc	CEF	12	3a	D7	5	ancestor	0.584	0.64	-0.088
12-3a-E1	12-3a-E1-1	1	GEN	12	3a	E1	12	random	0.855	0.946	-0.096
12-3a-E1	12-3a-E1-1	1	DOR	12	3a	E1	12	random	0.923	0.871	0.06
12-3a-E1	12-3a-E1-1	1	CEF	12	3a	E1	12	random	0.784	0.75	0.045
12-3a-E1	12-3a-E1-1	1	CAR	12	3a	E1	12	random	1.054	0.588	0.793
12-3a-E1	12-3a-E1-1	1	CIP	12	3a	E1	12	random	0.996	0.692	0.439
12-3a-E1	12-3a-E1-10	2	GEN	12	3a	E1	12	random	0.655	0.946	-0.308
12-3a-E1	12-3a-E1-10	2	CEF	12	3a	E1	12	random	0.773	0.75	0.031
12-3a-E1	12-3a-E1-10	2	CAR	12	3a	E1	12	random	0.957	0.588	0.628
12-3a-E1	12-3a-E1-10	2	DOR	12	3a	E1	12	random	0.797	0.871	-0.085
12-3a-E1	12-3a-E1-10	2	CIP	12	3a	E1	12	random	0.926	0.692	0.338
12-3a-E1	12-3a-E1-11	1	CEF	12	3a	E1	12	random	0.787	0.576	0.366
12-3a-E1	12-3a-E1-11	1	DOR	12	3a	E1	12	random	0.838	0.798	0.05
12-3a-E1	12-3a-E1-11	1	GEN	12	3a	E1	12	random	1.09	0.882	0.236
12-3a-E1	12-3a-E1-11	1	CIP	12	3a	E1	12	random	0.997	0.686	0.453
12-3a-E1	12-3a-E1-11	1	CAR	12	3a	E1	12	random	1.114	0.686	0.624
12-3a-E1	12-3a-E1-12	2	GEN	12	3a	E1	12	random	0.73	0.882	-0.172
12-3a-E1	12-3a-E1-12	2	CAR	12	3a	E1	12	random	1.087	0.686	0.585
12-3a-E1	12-3a-E1-12	2	CIP	12	3a	E1	12	random	0.986	0.686	0.437
12-3a-E1	12-3a-E1-12	2	CEF	12	3a	E1	12	random	0.76	0.576	0.319
12-3a-E1	12-3a-E1-12	2	DOR	12	3a	E1	12	random	0.773	0.798	-0.031
12-3a-E1	12-3a-E1-13	1	CAR	12	3a	E1	12	random	1.06	0.686	0.545
12-3a-E1	12-3a-E1-13	1	CIP	12	3a	E1	12	random	0.895	0.686	0.305
12-3a-E1	12-3a-E1-13	1	DOR	12	3a	E1	12	random	0.777	0.798	-0.026
12-3a-E1	12-3a-E1-13	1	GEN	12	3a	E1	12	random	0.816	0.882	-0.075
12-3a-E1	12-3a-E1-13	1	CEF	12	3a	E1	12	random	0.75	0.576	0.302
12-3a-E1	12-3a-E1-14	1	DOR	12	3a	E1	12	random	0.838	0.798	0.05
12-3a-E1	12-3a-E1-14	1	CEF	12	3a	E1	12	random	0.734	0.576	0.274
12-3a-E1	12-3a-E1-14	1	GEN	12	3a	E1	12	random	0.945	0.882	0.071
12-3a-E1	12-3a-E1-14	1	CIP	12	3a	E1	12	random	0.97	0.686	0.414
12-3a-E1	12-3a-E1-14	1	CAR	12	3a	E1	12	random	1.158	0.686	0.688
12-3a-E1	12-3a-E1-15	1	GEN	12	3a	E1	12	random	0.974	0.882	0.104
12-3a-E1	12-3a-E1-15	1	CEF	12	3a	E1	12	random	0.751	0.576	0.304
12-3a-E1	12-3a-E1-15	1	DOR	12	3a	E1	12	random	0.858	0.798	0.075
12-3a-E1	12-3a-E1-15	1	CIP	12	3a	E1	12	random	0.951	0.686	0.386
12-3a-E1	12-3a-E1-15	1	CAR	12	3a	E1	12	random	1.084	0.686	0.58
12-3a-E1	12-3a-E1-16	1	DOR	12	3a	E1	12	random	0.89	0.798	0.115
12-3a-E1	12-3a-E1-16	1	CAR	12	3a	E1	12	random	1.037	0.686	0.512
12-3a-E1	12-3a-E1-16	1	CEF	12	3a	E1	12	random	0.896	0.576	0.556
12-3a-E1	12-3a-E1-16	1	GEN	12	3a	E1	12	random	0.914	0.882	0.036
12-3a-E1	12-3a-E1-16	1	CIP	12	3a	E1	12	random	0.924	0.686	0.347
12-3a-E1	12-3a-E1-17	1	DOR	12	3a	E1	12	random	0.8	0.798	0.003
12-3a-E1	12-3a-E1-17	1	CEF	12	3a	E1	12	random	0.818	0.576	0.42
12-3a-E1	12-3a-E1-17	1	CIP	12	3a	E1	12	random	1.011	0.686	0.474
12-3a-E1	12-3a-E1-17	1	GEN	12	3a	E1	12	random	0.867	0.882	-0.017
12-3a-E1	12-3a-E1-17	1	CAR	12	3a	E1	12	random	1.081	0.686	0.576
12-3a-E1	12-3a-E1-18	1	CAR	12	3a	E1	12	random	1.018	0.686	0.484
12-3a-E1	12-3a-E1-18	1	CEF	12	3a	E1	12	random	0.696	0.576	0.208
12-3a-E1	12-3a-E1-18	1	DOR	12	3a	E1	12	random	0.933	0.798	0.169
12-3a-E1	12-3a-E1-18	1	CIP	12	3a	E1	12	random	0.979	0.686	0.427
12-3a-E1	12-3a-E1-18	1	GEN	12	3a	E1	12	random	0.859	0.882	-0.026
12-3a-E1	12-3a-E1-19	1	CEF	12	3a	E1	12	random	0.872	0.576	0.514
12-3a-E1	12-3a-E1-19	1	DOR	12	3a	E1	12	random	0.884	0.798	0.108
12-3a-E1	12-3a-E1-19	1	CIP	12	3a	E1	12	random	0.961	0.686	0.401
12-3a-E1	12-3a-E1-19	1	CAR	12	3a	E1	12	random	1	0.686	0.458
12-3a-E1	12-3a-E1-19	1	GEN	12	3a	E1	12	random	0.863	0.882	-0.022
12-3a-E1	12-3a-E1-2	1	CIP	12	3a	E1	12	random	0.957	0.692	0.383
12-3a-E1	12-3a-E1-2	1	DOR	12	3a	E1	12	random	0.932	0.871	0.07
12-3a-E1	12-3a-E1-2	1	GEN	12	3a	E1	12	random	0.839	0.946	-0.113
12-3a-E1	12-3a-E1-2	1	CAR	12	3a	E1	12	random	0.948	0.588	0.612
12-3a-E1	12-3a-E1-2	1	CEF	12	3a	E1	12	random	0.818	0.75	0.091
12-3a-E1	12-3a-E1-20	2	GEN	12	3a	E1	12	random	0.654	0.882	-0.259
12-3a-E1	12-3a-E1-20	2	DOR	12	3a	E1	12	random	0.956	0.798	0.198
12-3a-E1	12-3a-E1-20	2	CIP	12	3a	E1	12	random	0.929	0.686	0.354
12-3a-E1	12-3a-E1-20	2	CAR	12	3a	E1	12	random	1.014	0.686	0.478
12-3a-E1	12-3a-E1-20	2	CEF	12	3a	E1	12	random	0.825	0.576	0.432
12-3a-E1	12-3a-E1-3	1	DOR	12	3a	E1	12	random	0.847	0.871	-0.028
12-3a-E1	12-3a-E1-3	1	CAR	12	3a	E1	12	random	0.874	0.588	0.486
12-3a-E1	12-3a-E1-3	1	GEN	12	3a	E1	12	random	0.81	0.946	-0.144
12-3a-E1	12-3a-E1-3	1	CIP	12	3a	E1	12	random	0.905	0.692	0.308
12-3a-E1	12-3a-E1-3	1	CEF	12	3a	E1	12	random	0.887	0.75	0.183
12-3a-E1	12-3a-E1-4	1	DOR	12	3a	E1	12	random	0.913	0.871	0.048
12-3a-E1	12-3a-E1-4	1	CIP	12	3a	E1	12	random	0.944	0.692	0.364
12-3a-E1	12-3a-E1-4	1	CAR	12	3a	E1	12	random	0.959	0.588	0.631
12-3a-E1	12-3a-E1-4	1	GEN	12	3a	E1	12	random	0.885	0.946	-0.064
12-3a-E1	12-3a-E1-4	1	CEF	12	3a	E1	12	random	0.892	0.75	0.189
12-3a-E1	12-3a-E1-5	1	DOR	12	3a	E1	12	random	0.751	0.871	-0.138
12-3a-E1	12-3a-E1-5	1	CAR	12	3a	E1	12	random	1.022	0.588	0.738
12-3a-E1	12-3a-E1-5	1	GEN	12	3a	E1	12	random	0.906	0.946	-0.042
12-3a-E1	12-3a-E1-5	1	CEF	12	3a	E1	12	random	0.955	0.75	0.273
12-3a-E1	12-3a-E1-5	1	CIP	12	3a	E1	12	random	0.942	0.692	0.361
12-3a-E1	12-3a-E1-6	1	CIP	12	3a	E1	12	random	0.905	0.692	0.308
12-3a-E1	12-3a-E1-6	1	GEN	12	3a	E1	12	random	0.866	0.946	-0.085
12-3a-E1	12-3a-E1-6	1	CEF	12	3a	E1	12	random	0.884	0.75	0.179
12-3a-E1	12-3a-E1-6	1	DOR	12	3a	E1	12	random	1	0.871	0.148
12-3a-E1	12-3a-E1-6	1	CAR	12	3a	E1	12	random	0.985	0.588	0.675
12-3a-E1	12-3a-E1-7	1	DOR	12	3a	E1	12	random	0.846	0.871	-0.029
12-3a-E1	12-3a-E1-7	1	GEN	12	3a	E1	12	random	0.853	0.946	-0.098
12-3a-E1	12-3a-E1-7	1	CEF	12	3a	E1	12	random	0.862	0.75	0.149
12-3a-E1	12-3a-E1-7	1	CAR	12	3a	E1	12	random	0.89	0.588	0.514
12-3a-E1	12-3a-E1-7	1	CIP	12	3a	E1	12	random	0.932	0.692	0.347
12-3a-E1	12-3a-E1-8	2	GEN	12	3a	E1	12	random	0.809	0.946	-0.145
12-3a-E1	12-3a-E1-8	2	CAR	12	3a	E1	12	random	1.047	0.588	0.781
12-3a-E1	12-3a-E1-8	2	DOR	12	3a	E1	12	random	0.953	0.871	0.094
12-3a-E1	12-3a-E1-8	2	CEF	12	3a	E1	12	random	0.858	0.75	0.144
12-3a-E1	12-3a-E1-8	2	CIP	12	3a	E1	12	random	0.877	0.692	0.267
12-3a-E1	12-3a-E1-9	1	DOR	12	3a	E1	12	random	0.886	0.871	0.017
12-3a-E1	12-3a-E1-9	1	GEN	12	3a	E1	12	random	0.834	0.946	-0.118
12-3a-E1	12-3a-E1-9	1	CEF	12	3a	E1	12	random	0.806	0.75	0.075
12-3a-E1	12-3a-E1-9	1	CIP	12	3a	E1	12	random	0.92	0.692	0.329
12-3a-E1	12-3a-E1-9	1	CAR	12	3a	E1	12	random	0.911	0.588	0.549
12-3a-E1	12-3a-E1-anc100	anc	GEN	12	3a	E1	12	ancestor	0.887	0.882	0.006
12-3a-E1	12-3a-E1-anc100	anc	CAR	12	3a	E1	12	ancestor	0.629	0.686	-0.083
12-3a-E1	12-3a-E1-anc100	anc	CIP	12	3a	E1	12	ancestor	0.691	0.686	0.007
12-3a-E1	12-3a-E1-anc100	anc	CEF	12	3a	E1	12	ancestor	0.542	0.576	-0.059
12-3a-E1	12-3a-E1-anc25	anc	DOR	12	3a	E1	12	ancestor	0.864	0.871	-0.008
12-3a-E1	12-3a-E1-anc26	anc	DOR	12	3a	E1	12	ancestor	0.878	0.871	0.008
12-3a-E1	12-3a-E1-anc27	anc	DOR	12	3a	E1	12	ancestor	0.826	0.798	0.035
12-3a-E1	12-3a-E1-anc28	anc	DOR	12	3a	E1	12	ancestor	0.77	0.798	-0.035
12-3a-E1	12-3a-E1-anc97	anc	GEN	12	3a	E1	12	ancestor	1.002	0.946	0.059
12-3a-E1	12-3a-E1-anc97	anc	CIP	12	3a	E1	12	ancestor	0.775	0.692	0.12
12-3a-E1	12-3a-E1-anc97	anc	CAR	12	3a	E1	12	ancestor	0.568	0.588	-0.034
12-3a-E1	12-3a-E1-anc97	anc	CEF	12	3a	E1	12	ancestor	0.731	0.75	-0.025
12-3a-E1	12-3a-E1-anc98	anc	CEF	12	3a	E1	12	ancestor	0.769	0.75	0.025
12-3a-E1	12-3a-E1-anc98	anc	CAR	12	3a	E1	12	ancestor	0.608	0.588	0.034
12-3a-E1	12-3a-E1-anc98	anc	GEN	12	3a	E1	12	ancestor	0.889	0.946	-0.06
12-3a-E1	12-3a-E1-anc98	anc	CIP	12	3a	E1	12	ancestor	0.608	0.692	-0.121
12-3a-E1	12-3a-E1-anc99	anc	CAR	12	3a	E1	12	ancestor	0.742	0.686	0.082
12-3a-E1	12-3a-E1-anc99	anc	CEF	12	3a	E1	12	ancestor	0.61	0.576	0.059
12-3a-E1	12-3a-E1-anc99	anc	GEN	12	3a	E1	12	ancestor	0.877	0.882	-0.006
12-3a-E1	12-3a-E1-anc99	anc	CIP	12	3a	E1	12	ancestor	0.68	0.686	-0.009
12-3a-E7	12-3a-E7-1	1	CAR	12	3a	E7	3	mono	0.844	0.619	0.363
12-3a-E7	12-3a-E7-1	1	CIP	12	3a	E7	3	mono	0.747	0.57	0.311
12-3a-E7	12-3a-E7-1	1	DOR	12	3a	E7	3	mono	0.621	0.637	-0.025
12-3a-E7	12-3a-E7-1	1	CEF	12	3a	E7	3	mono	0.634	0.484	0.31
12-3a-E7	12-3a-E7-1	1	GEN	12	3a	E7	3	mono	0.631	0.819	-0.23
12-3a-E7	12-3a-E7-10	1	CEF	12	3a	E7	3	mono	0.695	0.484	0.436
12-3a-E7	12-3a-E7-10	1	GEN	12	3a	E7	3	mono	0.587	0.819	-0.283
12-3a-E7	12-3a-E7-10	1	CIP	12	3a	E7	3	mono	0.717	0.57	0.258
12-3a-E7	12-3a-E7-10	1	DOR	12	3a	E7	3	mono	0.588	0.637	-0.077
12-3a-E7	12-3a-E7-10	1	CAR	12	3a	E7	3	mono	0.772	0.619	0.247
12-3a-E7	12-3a-E7-11	1	DOR	12	3a	E7	3	mono	0.641	0.603	0.063
12-3a-E7	12-3a-E7-11	1	CEF	12	3a	E7	3	mono	0.699	0.444	0.574
12-3a-E7	12-3a-E7-11	1	CIP	12	3a	E7	3	mono	0.708	0.562	0.26
12-3a-E7	12-3a-E7-11	1	CAR	12	3a	E7	3	mono	0.909	0.638	0.425
12-3a-E7	12-3a-E7-11	1	GEN	12	3a	E7	3	mono	0.645	0.795	-0.189
12-3a-E7	12-3a-E7-12	1	CEF	12	3a	E7	3	mono	0.69	0.444	0.554
12-3a-E7	12-3a-E7-12	1	GEN	12	3a	E7	3	mono	0.656	0.795	-0.175
12-3a-E7	12-3a-E7-12	1	DOR	12	3a	E7	3	mono	0.611	0.603	0.013
12-3a-E7	12-3a-E7-12	1	CIP	12	3a	E7	3	mono	0.745	0.562	0.326
12-3a-E7	12-3a-E7-12	1	CAR	12	3a	E7	3	mono	0.823	0.638	0.29
12-3a-E7	12-3a-E7-13	1	CEF	12	3a	E7	3	mono	0.643	0.444	0.448
12-3a-E7	12-3a-E7-13	1	DOR	12	3a	E7	3	mono	0.611	0.603	0.013
12-3a-E7	12-3a-E7-13	1	CIP	12	3a	E7	3	mono	0.734	0.562	0.306
12-3a-E7	12-3a-E7-13	1	CAR	12	3a	E7	3	mono	0.87	0.638	0.364
12-3a-E7	12-3a-E7-13	1	GEN	12	3a	E7	3	mono	0.672	0.795	-0.155
12-3a-E7	12-3a-E7-14	1	CIP	12	3a	E7	3	mono	0.719	0.562	0.279
12-3a-E7	12-3a-E7-14	1	CEF	12	3a	E7	3	mono	0.662	0.444	0.491
12-3a-E7	12-3a-E7-14	1	DOR	12	3a	E7	3	mono	0.639	0.603	0.06
12-3a-E7	12-3a-E7-14	1	CAR	12	3a	E7	3	mono	0.864	0.638	0.354
12-3a-E7	12-3a-E7-14	1	GEN	12	3a	E7	3	mono	0.703	0.795	-0.116
12-3a-E7	12-3a-E7-15	1	DOR	12	3a	E7	3	mono	0.62	0.603	0.028
12-3a-E7	12-3a-E7-15	1	CEF	12	3a	E7	3	mono	0.636	0.444	0.432
12-3a-E7	12-3a-E7-15	1	GEN	12	3a	E7	3	mono	0.722	0.795	-0.092
12-3a-E7	12-3a-E7-15	1	CIP	12	3a	E7	3	mono	0.709	0.562	0.262
12-3a-E7	12-3a-E7-15	1	CAR	12	3a	E7	3	mono	0.879	0.638	0.378
12-3a-E7	12-3a-E7-16	1	CIP	12	3a	E7	3	mono	0.692	0.562	0.231
12-3a-E7	12-3a-E7-16	1	DOR	12	3a	E7	3	mono	0.604	0.603	0.002
12-3a-E7	12-3a-E7-16	1	CEF	12	3a	E7	3	mono	0.658	0.444	0.482
12-3a-E7	12-3a-E7-16	1	GEN	12	3a	E7	3	mono	0.643	0.795	-0.191
12-3a-E7	12-3a-E7-16	1	CAR	12	3a	E7	3	mono	0.858	0.638	0.345
12-3a-E7	12-3a-E7-17	1	DOR	12	3a	E7	3	mono	0.628	0.603	0.041
12-3a-E7	12-3a-E7-17	1	GEN	12	3a	E7	3	mono	0.596	0.795	-0.25
12-3a-E7	12-3a-E7-17	1	CEF	12	3a	E7	3	mono	0.595	0.444	0.34
12-3a-E7	12-3a-E7-17	1	CIP	12	3a	E7	3	mono	0.735	0.562	0.308
12-3a-E7	12-3a-E7-17	1	CAR	12	3a	E7	3	mono	0.891	0.638	0.397
12-3a-E7	12-3a-E7-18	1	CAR	12	3a	E7	3	mono	0.849	0.638	0.331
12-3a-E7	12-3a-E7-18	1	DOR	12	3a	E7	3	mono	0.635	0.603	0.053
12-3a-E7	12-3a-E7-18	1	GEN	12	3a	E7	3	mono	0.627	0.795	-0.211
12-3a-E7	12-3a-E7-18	1	CIP	12	3a	E7	3	mono	0.698	0.562	0.242
12-3a-E7	12-3a-E7-18	1	CEF	12	3a	E7	3	mono	0.623	0.444	0.403
12-3a-E7	12-3a-E7-19	1	CAR	12	3a	E7	3	mono	0.835	0.638	0.309
12-3a-E7	12-3a-E7-19	1	CEF	12	3a	E7	3	mono	0.586	0.444	0.32
12-3a-E7	12-3a-E7-19	1	GEN	12	3a	E7	3	mono	0.573	0.795	-0.279
12-3a-E7	12-3a-E7-19	1	CIP	12	3a	E7	3	mono	0.694	0.562	0.235
12-3a-E7	12-3a-E7-19	1	DOR	12	3a	E7	3	mono	0.604	0.603	0.002
12-3a-E7	12-3a-E7-2	1	GEN	12	3a	E7	3	mono	0.63	0.819	-0.231
12-3a-E7	12-3a-E7-2	1	DOR	12	3a	E7	3	mono	0.611	0.637	-0.041
12-3a-E7	12-3a-E7-2	1	CEF	12	3a	E7	3	mono	0.683	0.484	0.411
12-3a-E7	12-3a-E7-2	1	CIP	12	3a	E7	3	mono	0.717	0.57	0.258
12-3a-E7	12-3a-E7-2	1	CAR	12	3a	E7	3	mono	0.756	0.619	0.221
12-3a-E7	12-3a-E7-20	1	GEN	12	3a	E7	3	mono	0.613	0.795	-0.229
12-3a-E7	12-3a-E7-20	1	CEF	12	3a	E7	3	mono	0.62	0.444	0.396
12-3a-E7	12-3a-E7-20	1	CAR	12	3a	E7	3	mono	0.945	0.638	0.481
12-3a-E7	12-3a-E7-20	1	CIP	12	3a	E7	3	mono	0.743	0.562	0.322
12-3a-E7	12-3a-E7-20	1	DOR	12	3a	E7	3	mono	0.651	0.603	0.08
12-3a-E7	12-3a-E7-3	1	CAR	12	3a	E7	3	mono	0.792	0.619	0.279
12-3a-E7	12-3a-E7-3	1	CEF	12	3a	E7	3	mono	0.669	0.484	0.382
12-3a-E7	12-3a-E7-3	1	CIP	12	3a	E7	3	mono	0.704	0.57	0.235
12-3a-E7	12-3a-E7-3	1	DOR	12	3a	E7	3	mono	0.606	0.637	-0.049
12-3a-E7	12-3a-E7-3	1	GEN	12	3a	E7	3	mono	0.579	0.819	-0.293
12-3a-E7	12-3a-E7-4	1	CAR	12	3a	E7	3	mono	0.844	0.619	0.363
12-3a-E7	12-3a-E7-4	1	GEN	12	3a	E7	3	mono	0.581	0.819	-0.291
12-3a-E7	12-3a-E7-4	1	DOR	12	3a	E7	3	mono	0.624	0.637	-0.02
12-3a-E7	12-3a-E7-4	1	CIP	12	3a	E7	3	mono	0.712	0.57	0.249
12-3a-E7	12-3a-E7-4	1	CEF	12	3a	E7	3	mono	0.591	0.484	0.221
12-3a-E7	12-3a-E7-5	2	GEN	12	3a	E7	3	mono	0.845	0.819	0.032
12-3a-E7	12-3a-E7-5	2	CIP	12	3a	E7	3	mono	0.703	0.57	0.233
12-3a-E7	12-3a-E7-5	2	DOR	12	3a	E7	3	mono	0.892	0.637	0.4
12-3a-E7	12-3a-E7-5	2	CAR	12	3a	E7	3	mono	0.843	0.619	0.362
12-3a-E7	12-3a-E7-5	2	CEF	12	3a	E7	3	mono	0.837	0.484	0.729
12-3a-E7	12-3a-E7-6	1	CIP	12	3a	E7	3	mono	0.715	0.57	0.254
12-3a-E7	12-3a-E7-6	1	DOR	12	3a	E7	3	mono	0.592	0.637	-0.071
12-3a-E7	12-3a-E7-6	1	GEN	12	3a	E7	3	mono	0.575	0.819	-0.298
12-3a-E7	12-3a-E7-6	1	CAR	12	3a	E7	3	mono	0.796	0.619	0.286
12-3a-E7	12-3a-E7-6	1	CEF	12	3a	E7	3	mono	0.645	0.484	0.333
12-3a-E7	12-3a-E7-7	1	CAR	12	3a	E7	3	mono	0.821	0.619	0.326
12-3a-E7	12-3a-E7-7	1	GEN	12	3a	E7	3	mono	0.598	0.819	-0.27
12-3a-E7	12-3a-E7-7	1	DOR	12	3a	E7	3	mono	0.667	0.637	0.047
12-3a-E7	12-3a-E7-7	1	CIP	12	3a	E7	3	mono	0.747	0.57	0.311
12-3a-E7	12-3a-E7-7	1	CEF	12	3a	E7	3	mono	0.594	0.484	0.227
12-3a-E7	12-3a-E7-8	1	CAR	12	3a	E7	3	mono	0.804	0.619	0.299
12-3a-E7	12-3a-E7-8	1	CEF	12	3a	E7	3	mono	0.629	0.484	0.3
12-3a-E7	12-3a-E7-8	1	CIP	12	3a	E7	3	mono	0.732	0.57	0.284
12-3a-E7	12-3a-E7-8	1	GEN	12	3a	E7	3	mono	0.677	0.819	-0.173
12-3a-E7	12-3a-E7-8	1	DOR	12	3a	E7	3	mono	0.614	0.637	-0.036
12-3a-E7	12-3a-E7-9	1	CEF	12	3a	E7	3	mono	0.694	0.484	0.434
12-3a-E7	12-3a-E7-9	1	GEN	12	3a	E7	3	mono	0.618	0.819	-0.245
12-3a-E7	12-3a-E7-9	1	CAR	12	3a	E7	3	mono	0.766	0.619	0.237
12-3a-E7	12-3a-E7-9	1	DOR	12	3a	E7	3	mono	0.574	0.637	-0.099
12-3a-E7	12-3a-E7-9	1	CIP	12	3a	E7	3	mono	0.717	0.57	0.258
12-3a-E7	12-3a-E7-anc73	anc	DOR	12	3a	E7	3	ancestor	0.625	0.637	-0.019
12-3a-E7	12-3a-E7-anc73	anc	CEF	12	3a	E7	3	ancestor	0.495	0.484	0.023
12-3a-E7	12-3a-E7-anc73	anc	GEN	12	3a	E7	3	ancestor	0.811	0.819	-0.01
12-3a-E7	12-3a-E7-anc73	anc	CIP	12	3a	E7	3	ancestor	0.559	0.57	-0.019
12-3a-E7	12-3a-E7-anc73	anc	CAR	12	3a	E7	3	ancestor	0.632	0.619	0.021
12-3a-E7	12-3a-E7-anc74	anc	CAR	12	3a	E7	3	ancestor	0.606	0.619	-0.021
12-3a-E7	12-3a-E7-anc74	anc	DOR	12	3a	E7	3	ancestor	0.649	0.637	0.019
12-3a-E7	12-3a-E7-anc74	anc	CIP	12	3a	E7	3	ancestor	0.581	0.57	0.019
12-3a-E7	12-3a-E7-anc74	anc	GEN	12	3a	E7	3	ancestor	0.827	0.819	0.01
12-3a-E7	12-3a-E7-anc74	anc	CEF	12	3a	E7	3	ancestor	0.472	0.484	-0.025
12-3a-E7	12-3a-E7-anc75	anc	GEN	12	3a	E7	3	ancestor	0.824	0.795	0.036
12-3a-E7	12-3a-E7-anc75	anc	CEF	12	3a	E7	3	ancestor	0.462	0.444	0.041
12-3a-E7	12-3a-E7-anc75	anc	CAR	12	3a	E7	3	ancestor	0.603	0.638	-0.055
12-3a-E7	12-3a-E7-anc75	anc	DOR	12	3a	E7	3	ancestor	0.608	0.603	0.008
12-3a-E7	12-3a-E7-anc75	anc	CIP	12	3a	E7	3	ancestor	0.578	0.562	0.028
12-3a-E7	12-3a-E7-anc76	anc	CEF	12	3a	E7	3	ancestor	0.427	0.444	-0.038
12-3a-E7	12-3a-E7-anc76	anc	DOR	12	3a	E7	3	ancestor	0.598	0.603	-0.008
12-3a-E7	12-3a-E7-anc76	anc	CIP	12	3a	E7	3	ancestor	0.546	0.562	-0.028
12-3a-E7	12-3a-E7-anc76	anc	GEN	12	3a	E7	3	ancestor	0.766	0.795	-0.036
12-3a-E7	12-3a-E7-anc76	anc	CAR	12	3a	E7	3	ancestor	0.673	0.638	0.055
12-3a-F1	12-3a-F1-1	1	CEF	12	3a	F1	7	fast-regular	0.861	0.476	0.809
12-3a-F1	12-3a-F1-1	1	CAR	12	3a	F1	7	fast-regular	0.807	0.534	0.511
12-3a-F1	12-3a-F1-1	1	DOR	12	3a	F1	7	fast-regular	0.913	0.595	0.534
12-3a-F1	12-3a-F1-1	1	CIP	12	3a	F1	7	fast-regular	0.706	0.609	0.159
12-3a-F1	12-3a-F1-1	1	GEN	12	3a	F1	7	fast-regular	0.816	0.762	0.071
12-3a-F1	12-3a-F1-10	1	DOR	12	3a	F1	7	fast-regular	0.896	0.595	0.506
12-3a-F1	12-3a-F1-10	1	CEF	12	3a	F1	7	fast-regular	0.828	0.476	0.739
12-3a-F1	12-3a-F1-10	1	CIP	12	3a	F1	7	fast-regular	0.649	0.609	0.066
12-3a-F1	12-3a-F1-10	1	GEN	12	3a	F1	7	fast-regular	0.845	0.762	0.109
12-3a-F1	12-3a-F1-10	1	CAR	12	3a	F1	7	fast-regular	0.801	0.534	0.5
12-3a-F1	12-3a-F1-11	1	GEN	12	3a	F1	7	fast-regular	0.975	0.815	0.196
12-3a-F1	12-3a-F1-11	1	CAR	12	3a	F1	7	fast-regular	0.898	0.566	0.587
12-3a-F1	12-3a-F1-11	1	CIP	12	3a	F1	7	fast-regular	0.724	0.57	0.27
12-3a-F1	12-3a-F1-11	1	DOR	12	3a	F1	7	fast-regular	0.985	0.609	0.617
12-3a-F1	12-3a-F1-11	1	CEF	12	3a	F1	7	fast-regular	0.884	0.478	0.849
12-3a-F1	12-3a-F1-12	1	CEF	12	3a	F1	7	fast-regular	0.969	0.478	1.027
12-3a-F1	12-3a-F1-12	1	GEN	12	3a	F1	7	fast-regular	0.906	0.815	0.112
12-3a-F1	12-3a-F1-12	1	CAR	12	3a	F1	7	fast-regular	0.966	0.566	0.707
12-3a-F1	12-3a-F1-12	1	DOR	12	3a	F1	7	fast-regular	1.062	0.609	0.744
12-3a-F1	12-3a-F1-12	1	CIP	12	3a	F1	7	fast-regular	0.695	0.57	0.219
12-3a-F1	12-3a-F1-13	1	GEN	12	3a	F1	7	fast-regular	0.847	0.815	0.039
12-3a-F1	12-3a-F1-13	1	CEF	12	3a	F1	7	fast-regular	0.887	0.478	0.856
12-3a-F1	12-3a-F1-13	1	CIP	12	3a	F1	7	fast-regular	0.654	0.57	0.147
12-3a-F1	12-3a-F1-13	1	DOR	12	3a	F1	7	fast-regular	0.975	0.609	0.601
12-3a-F1	12-3a-F1-13	1	CAR	12	3a	F1	7	fast-regular	0.843	0.566	0.489
12-3a-F1	12-3a-F1-14	1	DOR	12	3a	F1	7	fast-regular	0.97	0.609	0.593
12-3a-F1	12-3a-F1-14	1	CAR	12	3a	F1	7	fast-regular	0.915	0.566	0.617
12-3a-F1	12-3a-F1-14	1	CIP	12	3a	F1	7	fast-regular	0.716	0.57	0.256
12-3a-F1	12-3a-F1-14	1	CEF	12	3a	F1	7	fast-regular	0.888	0.478	0.858
12-3a-F1	12-3a-F1-14	1	GEN	12	3a	F1	7	fast-regular	0.872	0.815	0.07
12-3a-F1	12-3a-F1-15	1	CIP	12	3a	F1	7	fast-regular	0.775	0.57	0.36
12-3a-F1	12-3a-F1-15	1	GEN	12	3a	F1	7	fast-regular	0.847	0.815	0.039
12-3a-F1	12-3a-F1-15	1	CEF	12	3a	F1	7	fast-regular	0.9	0.478	0.883
12-3a-F1	12-3a-F1-15	1	DOR	12	3a	F1	7	fast-regular	1.023	0.609	0.68
12-3a-F1	12-3a-F1-15	1	CAR	12	3a	F1	7	fast-regular	0.937	0.566	0.655
12-3a-F1	12-3a-F1-16	1	CEF	12	3a	F1	7	fast-regular	0.875	0.478	0.831
12-3a-F1	12-3a-F1-16	1	DOR	12	3a	F1	7	fast-regular	0.902	0.609	0.481
12-3a-F1	12-3a-F1-16	1	CAR	12	3a	F1	7	fast-regular	0.778	0.566	0.375
12-3a-F1	12-3a-F1-16	1	GEN	12	3a	F1	7	fast-regular	0.773	0.815	-0.052
12-3a-F1	12-3a-F1-16	1	CIP	12	3a	F1	7	fast-regular	0.639	0.57	0.121
12-3a-F1	12-3a-F1-17	1	CIP	12	3a	F1	7	fast-regular	0.713	0.57	0.251
12-3a-F1	12-3a-F1-17	1	DOR	12	3a	F1	7	fast-regular	0.935	0.609	0.535
12-3a-F1	12-3a-F1-17	1	GEN	12	3a	F1	7	fast-regular	0.836	0.815	0.026
12-3a-F1	12-3a-F1-17	1	CAR	12	3a	F1	7	fast-regular	0.811	0.566	0.433
12-3a-F1	12-3a-F1-17	1	CEF	12	3a	F1	7	fast-regular	0.842	0.478	0.762
12-3a-F1	12-3a-F1-18	1	DOR	12	3a	F1	7	fast-regular	0.952	0.609	0.563
12-3a-F1	12-3a-F1-18	1	CIP	12	3a	F1	7	fast-regular	0.629	0.57	0.104
12-3a-F1	12-3a-F1-18	1	CEF	12	3a	F1	7	fast-regular	0.873	0.478	0.826
12-3a-F1	12-3a-F1-18	1	CAR	12	3a	F1	7	fast-regular	0.88	0.566	0.555
12-3a-F1	12-3a-F1-18	1	GEN	12	3a	F1	7	fast-regular	0.753	0.815	-0.076
12-3a-F1	12-3a-F1-19	1	DOR	12	3a	F1	7	fast-regular	1.007	0.609	0.654
12-3a-F1	12-3a-F1-19	1	CAR	12	3a	F1	7	fast-regular	0.937	0.566	0.655
12-3a-F1	12-3a-F1-19	1	CIP	12	3a	F1	7	fast-regular	0.653	0.57	0.146
12-3a-F1	12-3a-F1-19	1	CEF	12	3a	F1	7	fast-regular	0.881	0.478	0.843
12-3a-F1	12-3a-F1-19	1	GEN	12	3a	F1	7	fast-regular	0.798	0.815	-0.021
12-3a-F1	12-3a-F1-2	1	CIP	12	3a	F1	7	fast-regular	0.65	0.609	0.067
12-3a-F1	12-3a-F1-2	1	CAR	12	3a	F1	7	fast-regular	0.761	0.534	0.425
12-3a-F1	12-3a-F1-2	1	CEF	12	3a	F1	7	fast-regular	0.827	0.476	0.737
12-3a-F1	12-3a-F1-2	1	GEN	12	3a	F1	7	fast-regular	0.924	0.762	0.213
12-3a-F1	12-3a-F1-2	1	DOR	12	3a	F1	7	fast-regular	0.921	0.595	0.548
12-3a-F1	12-3a-F1-20	1	CEF	12	3a	F1	7	fast-regular	0.885	0.478	0.851
12-3a-F1	12-3a-F1-20	1	CIP	12	3a	F1	7	fast-regular	0.642	0.57	0.126
12-3a-F1	12-3a-F1-20	1	GEN	12	3a	F1	7	fast-regular	0.766	0.815	-0.06
12-3a-F1	12-3a-F1-20	1	DOR	12	3a	F1	7	fast-regular	0.94	0.609	0.544
12-3a-F1	12-3a-F1-20	1	CAR	12	3a	F1	7	fast-regular	0.856	0.566	0.512
12-3a-F1	12-3a-F1-3	1	GEN	12	3a	F1	7	fast-regular	0.863	0.762	0.133
12-3a-F1	12-3a-F1-3	1	CEF	12	3a	F1	7	fast-regular	0.791	0.476	0.662
12-3a-F1	12-3a-F1-3	1	CIP	12	3a	F1	7	fast-regular	0.708	0.609	0.163
12-3a-F1	12-3a-F1-3	1	CAR	12	3a	F1	7	fast-regular	0.737	0.534	0.38
12-3a-F1	12-3a-F1-3	1	DOR	12	3a	F1	7	fast-regular	0.907	0.595	0.524
12-3a-F1	12-3a-F1-4	1	CIP	12	3a	F1	7	fast-regular	0.707	0.609	0.161
12-3a-F1	12-3a-F1-4	1	CAR	12	3a	F1	7	fast-regular	0.87	0.534	0.629
12-3a-F1	12-3a-F1-4	1	GEN	12	3a	F1	7	fast-regular	0.84	0.762	0.102
12-3a-F1	12-3a-F1-4	1	CEF	12	3a	F1	7	fast-regular	0.891	0.476	0.872
12-3a-F1	12-3a-F1-4	1	DOR	12	3a	F1	7	fast-regular	0.931	0.595	0.565
12-3a-F1	12-3a-F1-5	1	CIP	12	3a	F1	7	fast-regular	0.717	0.609	0.177
12-3a-F1	12-3a-F1-5	1	DOR	12	3a	F1	7	fast-regular	0.913	0.595	0.534
12-3a-F1	12-3a-F1-5	1	CEF	12	3a	F1	7	fast-regular	0.79	0.476	0.66
12-3a-F1	12-3a-F1-5	1	CAR	12	3a	F1	7	fast-regular	0.883	0.534	0.654
12-3a-F1	12-3a-F1-5	1	GEN	12	3a	F1	7	fast-regular	0.85	0.762	0.115
12-3a-F1	12-3a-F1-6	1	CIP	12	3a	F1	7	fast-regular	0.622	0.609	0.021
12-3a-F1	12-3a-F1-6	1	CEF	12	3a	F1	7	fast-regular	0.862	0.476	0.811
12-3a-F1	12-3a-F1-6	1	GEN	12	3a	F1	7	fast-regular	0.812	0.762	0.066
12-3a-F1	12-3a-F1-6	1	CAR	12	3a	F1	7	fast-regular	0.806	0.534	0.509
12-3a-F1	12-3a-F1-6	1	DOR	12	3a	F1	7	fast-regular	0.935	0.595	0.571
12-3a-F1	12-3a-F1-7	1	CIP	12	3a	F1	7	fast-regular	0.71	0.609	0.166
12-3a-F1	12-3a-F1-7	1	DOR	12	3a	F1	7	fast-regular	1.011	0.595	0.699
12-3a-F1	12-3a-F1-7	1	CEF	12	3a	F1	7	fast-regular	0.856	0.476	0.798
12-3a-F1	12-3a-F1-7	1	GEN	12	3a	F1	7	fast-regular	0.862	0.762	0.131
12-3a-F1	12-3a-F1-7	1	CAR	12	3a	F1	7	fast-regular	0.873	0.534	0.635
12-3a-F1	12-3a-F1-8	1	CIP	12	3a	F1	7	fast-regular	0.651	0.609	0.069
12-3a-F1	12-3a-F1-8	1	CAR	12	3a	F1	7	fast-regular	0.831	0.534	0.556
12-3a-F1	12-3a-F1-8	1	GEN	12	3a	F1	7	fast-regular	0.832	0.762	0.092
12-3a-F1	12-3a-F1-8	1	DOR	12	3a	F1	7	fast-regular	0.961	0.595	0.615
12-3a-F1	12-3a-F1-8	1	CEF	12	3a	F1	7	fast-regular	0.894	0.476	0.878
12-3a-F1	12-3a-F1-9	1	GEN	12	3a	F1	7	fast-regular	0.772	0.762	0.013
12-3a-F1	12-3a-F1-9	1	CIP	12	3a	F1	7	fast-regular	0.623	0.609	0.023
12-3a-F1	12-3a-F1-9	1	CEF	12	3a	F1	7	fast-regular	0.872	0.476	0.832
12-3a-F1	12-3a-F1-9	1	DOR	12	3a	F1	7	fast-regular	0.88	0.595	0.479
12-3a-F1	12-3a-F1-9	1	CAR	12	3a	F1	7	fast-regular	0.803	0.534	0.504
12-3a-F1	12-3a-F1-anc53	anc	CIP	12	3a	F1	7	ancestor	0.63	0.609	0.034
12-3a-F1	12-3a-F1-anc53	anc	DOR	12	3a	F1	7	ancestor	0.551	0.595	-0.074
12-3a-F1	12-3a-F1-anc53	anc	CEF	12	3a	F1	7	ancestor	0.48	0.476	0.008
12-3a-F1	12-3a-F1-anc53	anc	GEN	12	3a	F1	7	ancestor	0.761	0.762	-0.001
12-3a-F1	12-3a-F1-anc53	anc	CAR	12	3a	F1	7	ancestor	0.526	0.534	-0.015
12-3a-F1	12-3a-F1-anc54	anc	CEF	12	3a	F1	7	ancestor	0.471	0.476	-0.011
12-3a-F1	12-3a-F1-anc54	anc	CIP	12	3a	F1	7	ancestor	0.588	0.609	-0.034
12-3a-F1	12-3a-F1-anc54	anc	GEN	12	3a	F1	7	ancestor	0.764	0.762	0.003
12-3a-F1	12-3a-F1-anc54	anc	CAR	12	3a	F1	7	ancestor	0.542	0.534	0.015
12-3a-F1	12-3a-F1-anc54	anc	DOR	12	3a	F1	7	ancestor	0.639	0.595	0.074
12-3a-F1	12-3a-F1-anc55	anc	CAR	12	3a	F1	7	ancestor	0.536	0.566	-0.053
12-3a-F1	12-3a-F1-anc55	anc	CEF	12	3a	F1	7	ancestor	0.456	0.478	-0.046
12-3a-F1	12-3a-F1-anc55	anc	GEN	12	3a	F1	7	ancestor	0.795	0.815	-0.025
12-3a-F1	12-3a-F1-anc55	anc	DOR	12	3a	F1	7	ancestor	0.58	0.609	-0.048
12-3a-F1	12-3a-F1-anc55	anc	CIP	12	3a	F1	7	ancestor	0.579	0.57	0.016
12-3a-F1	12-3a-F1-anc56	anc	CIP	12	3a	F1	7	ancestor	0.562	0.57	-0.014
12-3a-F1	12-3a-F1-anc56	anc	CEF	12	3a	F1	7	ancestor	0.499	0.478	0.044
12-3a-F1	12-3a-F1-anc56	anc	CAR	12	3a	F1	7	ancestor	0.596	0.566	0.053
12-3a-F1	12-3a-F1-anc56	anc	GEN	12	3a	F1	7	ancestor	0.835	0.815	0.025
12-3a-F1	12-3a-F1-anc56	anc	DOR	12	3a	F1	7	ancestor	0.638	0.609	0.048
12-3a-F3	12-3a-F3-1	1	CEF	12	3a	F3	7	fast-regular	0.96	0.651	0.475
12-3a-F3	12-3a-F3-1	1	CAR	12	3a	F3	7	fast-regular	1.184	0.612	0.935
12-3a-F3	12-3a-F3-1	1	DOR	12	3a	F3	7	fast-regular	0.785	0.589	0.333
12-3a-F3	12-3a-F3-1	1	GEN	12	3a	F3	7	fast-regular	0.649	0.879	-0.262
12-3a-F3	12-3a-F3-1	1	CIP	12	3a	F3	7	fast-regular	1.057	0.667	0.585
12-3a-F3	12-3a-F3-10	1	CAR	12	3a	F3	7	fast-regular	1.249	0.612	1.041
12-3a-F3	12-3a-F3-10	1	GEN	12	3a	F3	7	fast-regular	0.799	0.879	-0.091
12-3a-F3	12-3a-F3-10	1	CEF	12	3a	F3	7	fast-regular	0.932	0.651	0.432
12-3a-F3	12-3a-F3-10	1	CIP	12	3a	F3	7	fast-regular	1.022	0.667	0.532
12-3a-F3	12-3a-F3-10	1	DOR	12	3a	F3	7	fast-regular	0.741	0.589	0.258
12-3a-F3	12-3a-F3-11	1	DOR	12	3a	F3	7	fast-regular	0.812	0.656	0.238
12-3a-F3	12-3a-F3-11	1	CAR	12	3a	F3	7	fast-regular	0.957	0.55	0.74
12-3a-F3	12-3a-F3-11	1	CEF	12	3a	F3	7	fast-regular	0.959	0.536	0.789
12-3a-F3	12-3a-F3-11	1	GEN	12	3a	F3	7	fast-regular	0.872	0.886	-0.016
12-3a-F3	12-3a-F3-11	1	CIP	12	3a	F3	7	fast-regular	1.097	0.646	0.698
12-3a-F3	12-3a-F3-12	1	CAR	12	3a	F3	7	fast-regular	1.012	0.55	0.84
12-3a-F3	12-3a-F3-12	1	DOR	12	3a	F3	7	fast-regular	0.748	0.656	0.14
12-3a-F3	12-3a-F3-12	1	GEN	12	3a	F3	7	fast-regular	0.888	0.886	0.002
12-3a-F3	12-3a-F3-12	1	CEF	12	3a	F3	7	fast-regular	0.968	0.536	0.806
12-3a-F3	12-3a-F3-12	1	CIP	12	3a	F3	7	fast-regular	1	0.646	0.548
12-3a-F3	12-3a-F3-13	1	DOR	12	3a	F3	7	fast-regular	0.745	0.656	0.136
12-3a-F3	12-3a-F3-13	1	CAR	12	3a	F3	7	fast-regular	0.956	0.55	0.738
12-3a-F3	12-3a-F3-13	1	GEN	12	3a	F3	7	fast-regular	0.839	0.886	-0.053
12-3a-F3	12-3a-F3-13	1	CEF	12	3a	F3	7	fast-regular	0.887	0.536	0.655
12-3a-F3	12-3a-F3-13	1	CIP	12	3a	F3	7	fast-regular	0.974	0.646	0.508
12-3a-F3	12-3a-F3-14	1	GEN	12	3a	F3	7	fast-regular	0.917	0.886	0.035
12-3a-F3	12-3a-F3-14	1	CEF	12	3a	F3	7	fast-regular	0.909	0.536	0.696
12-3a-F3	12-3a-F3-14	1	CAR	12	3a	F3	7	fast-regular	1.007	0.55	0.831
12-3a-F3	12-3a-F3-14	1	CIP	12	3a	F3	7	fast-regular	1.15	0.646	0.78
12-3a-F3	12-3a-F3-14	1	DOR	12	3a	F3	7	fast-regular	0.78	0.656	0.189
12-3a-F3	12-3a-F3-15	1	CEF	12	3a	F3	7	fast-regular	0.961	0.536	0.793
12-3a-F3	12-3a-F3-15	1	CIP	12	3a	F3	7	fast-regular	1.052	0.646	0.628
12-3a-F3	12-3a-F3-15	1	DOR	12	3a	F3	7	fast-regular	0.891	0.656	0.358
12-3a-F3	12-3a-F3-15	1	GEN	12	3a	F3	7	fast-regular	0.811	0.886	-0.085
12-3a-F3	12-3a-F3-15	1	CAR	12	3a	F3	7	fast-regular	1.039	0.55	0.889
12-3a-F3	12-3a-F3-16	1	CAR	12	3a	F3	7	fast-regular	1.024	0.55	0.862
12-3a-F3	12-3a-F3-16	1	CIP	12	3a	F3	7	fast-regular	1.044	0.646	0.616
12-3a-F3	12-3a-F3-16	1	CEF	12	3a	F3	7	fast-regular	0.972	0.536	0.813
12-3a-F3	12-3a-F3-16	1	GEN	12	3a	F3	7	fast-regular	0.785	0.886	-0.114
12-3a-F3	12-3a-F3-16	1	DOR	12	3a	F3	7	fast-regular	0.776	0.656	0.183
12-3a-F3	12-3a-F3-17	1	CIP	12	3a	F3	7	fast-regular	1.057	0.646	0.636
12-3a-F3	12-3a-F3-17	1	GEN	12	3a	F3	7	fast-regular	0.843	0.886	-0.049
12-3a-F3	12-3a-F3-17	1	CEF	12	3a	F3	7	fast-regular	0.922	0.536	0.72
12-3a-F3	12-3a-F3-17	1	CAR	12	3a	F3	7	fast-regular	0.97	0.55	0.764
12-3a-F3	12-3a-F3-17	1	DOR	12	3a	F3	7	fast-regular	0.872	0.656	0.329
12-3a-F3	12-3a-F3-18	1	CIP	12	3a	F3	7	fast-regular	1.021	0.646	0.58
12-3a-F3	12-3a-F3-18	1	CEF	12	3a	F3	7	fast-regular	0.902	0.536	0.683
12-3a-F3	12-3a-F3-18	1	DOR	12	3a	F3	7	fast-regular	0.799	0.656	0.218
12-3a-F3	12-3a-F3-18	1	GEN	12	3a	F3	7	fast-regular	0.932	0.886	0.052
12-3a-F3	12-3a-F3-18	1	CAR	12	3a	F3	7	fast-regular	0.971	0.55	0.765
12-3a-F3	12-3a-F3-19	1	CEF	12	3a	F3	7	fast-regular	0.992	0.536	0.851
12-3a-F3	12-3a-F3-19	1	CIP	12	3a	F3	7	fast-regular	1.072	0.646	0.659
12-3a-F3	12-3a-F3-19	1	DOR	12	3a	F3	7	fast-regular	0.872	0.656	0.329
12-3a-F3	12-3a-F3-19	1	GEN	12	3a	F3	7	fast-regular	0.855	0.886	-0.035
12-3a-F3	12-3a-F3-19	1	CAR	12	3a	F3	7	fast-regular	0.969	0.55	0.762
12-3a-F3	12-3a-F3-2	1	CEF	12	3a	F3	7	fast-regular	0.946	0.651	0.453
12-3a-F3	12-3a-F3-2	1	CAR	12	3a	F3	7	fast-regular	1.09	0.612	0.781
12-3a-F3	12-3a-F3-2	1	CIP	12	3a	F3	7	fast-regular	0.966	0.667	0.448
12-3a-F3	12-3a-F3-2	1	DOR	12	3a	F3	7	fast-regular	0.77	0.589	0.307
12-3a-F3	12-3a-F3-2	1	GEN	12	3a	F3	7	fast-regular	0.883	0.879	0.005
12-3a-F3	12-3a-F3-20	1	GEN	12	3a	F3	7	fast-regular	0.906	0.886	0.023
12-3a-F3	12-3a-F3-20	1	CIP	12	3a	F3	7	fast-regular	1.029	0.646	0.593
12-3a-F3	12-3a-F3-20	1	DOR	12	3a	F3	7	fast-regular	0.786	0.656	0.198
12-3a-F3	12-3a-F3-20	1	CAR	12	3a	F3	7	fast-regular	1.049	0.55	0.907
12-3a-F3	12-3a-F3-20	1	CEF	12	3a	F3	7	fast-regular	0.884	0.536	0.649
12-3a-F3	12-3a-F3-3	1	CAR	12	3a	F3	7	fast-regular	1.144	0.612	0.869
12-3a-F3	12-3a-F3-3	1	CIP	12	3a	F3	7	fast-regular	1.057	0.667	0.585
12-3a-F3	12-3a-F3-3	1	GEN	12	3a	F3	7	fast-regular	0.741	0.879	-0.157
12-3a-F3	12-3a-F3-3	1	CEF	12	3a	F3	7	fast-regular	1.07	0.651	0.644
12-3a-F3	12-3a-F3-3	1	DOR	12	3a	F3	7	fast-regular	0.766	0.589	0.301
12-3a-F3	12-3a-F3-4	1	CAR	12	3a	F3	7	fast-regular	1.175	0.612	0.92
12-3a-F3	12-3a-F3-4	1	GEN	12	3a	F3	7	fast-regular	0.749	0.879	-0.148
12-3a-F3	12-3a-F3-4	1	CIP	12	3a	F3	7	fast-regular	1.042	0.667	0.562
12-3a-F3	12-3a-F3-4	1	DOR	12	3a	F3	7	fast-regular	0.816	0.589	0.385
12-3a-F3	12-3a-F3-4	1	CEF	12	3a	F3	7	fast-regular	1.159	0.651	0.78
12-3a-F3	12-3a-F3-5	1	CEF	12	3a	F3	7	fast-regular	1.063	0.651	0.633
12-3a-F3	12-3a-F3-5	1	DOR	12	3a	F3	7	fast-regular	0.871	0.589	0.479
12-3a-F3	12-3a-F3-5	1	GEN	12	3a	F3	7	fast-regular	0.769	0.879	-0.125
12-3a-F3	12-3a-F3-5	1	CAR	12	3a	F3	7	fast-regular	1.178	0.612	0.925
12-3a-F3	12-3a-F3-5	1	CIP	12	3a	F3	7	fast-regular	1.041	0.667	0.561
12-3a-F3	12-3a-F3-6	1	CIP	12	3a	F3	7	fast-regular	0.966	0.667	0.448
12-3a-F3	12-3a-F3-6	1	CAR	12	3a	F3	7	fast-regular	1.14	0.612	0.863
12-3a-F3	12-3a-F3-6	1	DOR	12	3a	F3	7	fast-regular	0.796	0.589	0.351
12-3a-F3	12-3a-F3-6	1	CEF	12	3a	F3	7	fast-regular	0.967	0.651	0.485
12-3a-F3	12-3a-F3-6	1	GEN	12	3a	F3	7	fast-regular	0.76	0.879	-0.135
12-3a-F3	12-3a-F3-7	2	CEF	12	3a	F3	7	fast-regular	0.959	0.651	0.473
12-3a-F3	12-3a-F3-7	2	CAR	12	3a	F3	7	fast-regular	1.328	0.612	1.17
12-3a-F3	12-3a-F3-7	2	GEN	12	3a	F3	7	fast-regular	0.665	0.879	-0.243
12-3a-F3	12-3a-F3-7	2	CIP	12	3a	F3	7	fast-regular	0.972	0.667	0.457
12-3a-F3	12-3a-F3-7	2	DOR	12	3a	F3	7	fast-regular	0.853	0.589	0.448
12-3a-F3	12-3a-F3-8	1	DOR	12	3a	F3	7	fast-regular	0.85	0.589	0.443
12-3a-F3	12-3a-F3-8	1	CIP	12	3a	F3	7	fast-regular	1.044	0.667	0.565
12-3a-F3	12-3a-F3-8	1	CAR	12	3a	F3	7	fast-regular	1.174	0.612	0.918
12-3a-F3	12-3a-F3-8	1	GEN	12	3a	F3	7	fast-regular	0.789	0.879	-0.102
12-3a-F3	12-3a-F3-8	1	CEF	12	3a	F3	7	fast-regular	1.021	0.651	0.568
12-3a-F3	12-3a-F3-9	1	CEF	12	3a	F3	7	fast-regular	0.946	0.651	0.453
12-3a-F3	12-3a-F3-9	1	CIP	12	3a	F3	7	fast-regular	0.97	0.667	0.454
12-3a-F3	12-3a-F3-9	1	CAR	12	3a	F3	7	fast-regular	1.154	0.612	0.886
12-3a-F3	12-3a-F3-9	1	GEN	12	3a	F3	7	fast-regular	0.716	0.879	-0.185
12-3a-F3	12-3a-F3-9	1	DOR	12	3a	F3	7	fast-regular	0.748	0.589	0.27
12-3a-F3	12-3a-F3-anc57	anc	CEF	12	3a	F3	7	ancestor	0.68	0.651	0.045
12-3a-F3	12-3a-F3-anc57	anc	CAR	12	3a	F3	7	ancestor	0.558	0.612	-0.088
12-3a-F3	12-3a-F3-anc57	anc	GEN	12	3a	F3	7	ancestor	0.943	0.879	0.073
12-3a-F3	12-3a-F3-anc57	anc	DOR	12	3a	F3	7	ancestor	0.608	0.589	0.032
12-3a-F3	12-3a-F3-anc57	anc	CIP	12	3a	F3	7	ancestor	0.673	0.667	0.009
12-3a-F3	12-3a-F3-anc58	anc	DOR	12	3a	F3	7	ancestor	0.571	0.589	-0.031
12-3a-F3	12-3a-F3-anc58	anc	CEF	12	3a	F3	7	ancestor	0.621	0.651	-0.046
12-3a-F3	12-3a-F3-anc58	anc	CIP	12	3a	F3	7	ancestor	0.661	0.667	-0.009
12-3a-F3	12-3a-F3-anc58	anc	GEN	12	3a	F3	7	ancestor	0.815	0.879	-0.073
12-3a-F3	12-3a-F3-anc58	anc	CAR	12	3a	F3	7	ancestor	0.666	0.612	0.088
12-3a-F3	12-3a-F3-anc59	anc	CEF	12	3a	F3	7	ancestor	0.515	0.536	-0.039
12-3a-F3	12-3a-F3-anc59	anc	CIP	12	3a	F3	7	ancestor	0.688	0.646	0.065
12-3a-F3	12-3a-F3-anc59	anc	CAR	12	3a	F3	7	ancestor	0.514	0.55	-0.065
12-3a-F3	12-3a-F3-anc59	anc	DOR	12	3a	F3	7	ancestor	0.622	0.656	-0.052
12-3a-F3	12-3a-F3-anc59	anc	GEN	12	3a	F3	7	ancestor	0.88	0.886	-0.007
12-3a-F3	12-3a-F3-anc60	anc	CEF	12	3a	F3	7	ancestor	0.556	0.536	0.037
12-3a-F3	12-3a-F3-anc60	anc	DOR	12	3a	F3	7	ancestor	0.691	0.656	0.053
12-3a-F3	12-3a-F3-anc60	anc	CIP	12	3a	F3	7	ancestor	0.603	0.646	-0.067
12-3a-F3	12-3a-F3-anc60	anc	GEN	12	3a	F3	7	ancestor	0.892	0.886	0.007
12-3a-F3	12-3a-F3-anc60	anc	CAR	12	3a	F3	7	ancestor	0.587	0.55	0.067
12-3a-F7	12-3a-F7-1	1	CIP	12	3a	F7	4	nodrug	0.728	0.712	0.022
12-3a-F7	12-3a-F7-1	1	CEF	12	3a	F7	4	nodrug	0.647	0.577	0.121
12-3a-F7	12-3a-F7-1	1	CAR	12	3a	F7	4	nodrug	0.614	0.634	-0.032
12-3a-F7	12-3a-F7-1	1	GEN	12	3a	F7	4	nodrug	0.709	0.719	-0.014
12-3a-F7	12-3a-F7-1	1	DOR	12	3a	F7	4	nodrug	0.816	0.854	-0.044
12-3a-F7	12-3a-F7-10	1	CIP	12	3a	F7	4	nodrug	0.638	0.712	-0.104
12-3a-F7	12-3a-F7-10	1	DOR	12	3a	F7	4	nodrug	0.721	0.854	-0.156
12-3a-F7	12-3a-F7-10	1	CAR	12	3a	F7	4	nodrug	0.655	0.634	0.033
12-3a-F7	12-3a-F7-10	1	GEN	12	3a	F7	4	nodrug	0.78	0.719	0.085
12-3a-F7	12-3a-F7-10	1	CEF	12	3a	F7	4	nodrug	0.679	0.577	0.177
12-3a-F7	12-3a-F7-11	1	GEN	12	3a	F7	4	nodrug	0.76	0.824	-0.078
12-3a-F7	12-3a-F7-11	1	CIP	12	3a	F7	4	nodrug	0.664	0.679	-0.022
12-3a-F7	12-3a-F7-11	1	CEF	12	3a	F7	4	nodrug	0.538	0.599	-0.102
12-3a-F7	12-3a-F7-11	1	CAR	12	3a	F7	4	nodrug	0.683	0.72	-0.051
12-3a-F7	12-3a-F7-11	1	DOR	12	3a	F7	4	nodrug	0.738	0.846	-0.128
12-3a-F7	12-3a-F7-12	1	DOR	12	3a	F7	4	nodrug	0.759	0.846	-0.103
12-3a-F7	12-3a-F7-12	1	GEN	12	3a	F7	4	nodrug	0.893	0.824	0.084
12-3a-F7	12-3a-F7-12	1	CEF	12	3a	F7	4	nodrug	0.545	0.599	-0.09
12-3a-F7	12-3a-F7-12	1	CAR	12	3a	F7	4	nodrug	0.669	0.72	-0.071
12-3a-F7	12-3a-F7-12	1	CIP	12	3a	F7	4	nodrug	0.633	0.679	-0.068
12-3a-F7	12-3a-F7-13	1	DOR	12	3a	F7	4	nodrug	0.74	0.846	-0.125
12-3a-F7	12-3a-F7-13	1	GEN	12	3a	F7	4	nodrug	0.741	0.824	-0.101
12-3a-F7	12-3a-F7-13	1	CIP	12	3a	F7	4	nodrug	0.679	0.679	0
12-3a-F7	12-3a-F7-13	1	CAR	12	3a	F7	4	nodrug	0.657	0.72	-0.087
12-3a-F7	12-3a-F7-13	1	CEF	12	3a	F7	4	nodrug	0.644	0.599	0.075
12-3a-F7	12-3a-F7-14	1	GEN	12	3a	F7	4	nodrug	0.895	0.824	0.086
12-3a-F7	12-3a-F7-14	1	CIP	12	3a	F7	4	nodrug	0.739	0.679	0.088
12-3a-F7	12-3a-F7-14	1	CAR	12	3a	F7	4	nodrug	0.78	0.72	0.083
12-3a-F7	12-3a-F7-14	1	DOR	12	3a	F7	4	nodrug	0.821	0.846	-0.03
12-3a-F7	12-3a-F7-14	1	CEF	12	3a	F7	4	nodrug	0.601	0.599	0.003
12-3a-F7	12-3a-F7-15	1	CEF	12	3a	F7	4	nodrug	0.59	0.599	-0.015
12-3a-F7	12-3a-F7-15	1	DOR	12	3a	F7	4	nodrug	0.757	0.846	-0.105
12-3a-F7	12-3a-F7-15	1	CIP	12	3a	F7	4	nodrug	0.689	0.679	0.015
12-3a-F7	12-3a-F7-15	1	GEN	12	3a	F7	4	nodrug	0.896	0.824	0.087
12-3a-F7	12-3a-F7-15	1	CAR	12	3a	F7	4	nodrug	0.629	0.72	-0.126
12-3a-F7	12-3a-F7-16	1	CEF	12	3a	F7	4	nodrug	0.544	0.599	-0.092
12-3a-F7	12-3a-F7-16	1	CIP	12	3a	F7	4	nodrug	0.641	0.679	-0.056
12-3a-F7	12-3a-F7-16	1	GEN	12	3a	F7	4	nodrug	0.767	0.824	-0.069
12-3a-F7	12-3a-F7-16	1	CAR	12	3a	F7	4	nodrug	0.605	0.72	-0.16
12-3a-F7	12-3a-F7-16	1	DOR	12	3a	F7	4	nodrug	0.711	0.846	-0.16
12-3a-F7	12-3a-F7-17	1	CEF	12	3a	F7	4	nodrug	0.579	0.599	-0.033
12-3a-F7	12-3a-F7-17	1	DOR	12	3a	F7	4	nodrug	0.747	0.846	-0.117
12-3a-F7	12-3a-F7-17	1	CAR	12	3a	F7	4	nodrug	0.716	0.72	-0.006
12-3a-F7	12-3a-F7-17	1	CIP	12	3a	F7	4	nodrug	0.627	0.679	-0.077
12-3a-F7	12-3a-F7-17	1	GEN	12	3a	F7	4	nodrug	0.946	0.824	0.148
12-3a-F7	12-3a-F7-18	1	GEN	12	3a	F7	4	nodrug	0.858	0.824	0.041
12-3a-F7	12-3a-F7-18	1	CEF	12	3a	F7	4	nodrug	0.584	0.599	-0.025
12-3a-F7	12-3a-F7-18	1	DOR	12	3a	F7	4	nodrug	0.724	0.846	-0.144
12-3a-F7	12-3a-F7-18	1	CIP	12	3a	F7	4	nodrug	0.639	0.679	-0.059
12-3a-F7	12-3a-F7-18	1	CAR	12	3a	F7	4	nodrug	0.668	0.72	-0.072
12-3a-F7	12-3a-F7-19	1	CAR	12	3a	F7	4	nodrug	0.64	0.72	-0.111
12-3a-F7	12-3a-F7-19	1	DOR	12	3a	F7	4	nodrug	0.867	0.846	0.025
12-3a-F7	12-3a-F7-19	1	GEN	12	3a	F7	4	nodrug	0.853	0.824	0.035
12-3a-F7	12-3a-F7-19	1	CIP	12	3a	F7	4	nodrug	0.652	0.679	-0.04
12-3a-F7	12-3a-F7-19	1	CEF	12	3a	F7	4	nodrug	0.568	0.599	-0.052
12-3a-F7	12-3a-F7-2	1	CEF	12	3a	F7	4	nodrug	0.65	0.577	0.127
12-3a-F7	12-3a-F7-2	1	CIP	12	3a	F7	4	nodrug	0.647	0.712	-0.091
12-3a-F7	12-3a-F7-2	1	DOR	12	3a	F7	4	nodrug	0.795	0.854	-0.069
12-3a-F7	12-3a-F7-2	1	GEN	12	3a	F7	4	nodrug	0.848	0.719	0.179
12-3a-F7	12-3a-F7-2	1	CAR	12	3a	F7	4	nodrug	0.579	0.634	-0.087
12-3a-F7	12-3a-F7-20	1	DOR	12	3a	F7	4	nodrug	0.74	0.846	-0.125
12-3a-F7	12-3a-F7-20	1	GEN	12	3a	F7	4	nodrug	0.857	0.824	0.04
12-3a-F7	12-3a-F7-20	1	CEF	12	3a	F7	4	nodrug	0.535	0.599	-0.107
12-3a-F7	12-3a-F7-20	1	CAR	12	3a	F7	4	nodrug	0.626	0.72	-0.131
12-3a-F7	12-3a-F7-20	1	CIP	12	3a	F7	4	nodrug	0.616	0.679	-0.093
12-3a-F7	12-3a-F7-3	1	CAR	12	3a	F7	4	nodrug	0.608	0.634	-0.041
12-3a-F7	12-3a-F7-3	1	DOR	12	3a	F7	4	nodrug	0.788	0.854	-0.077
12-3a-F7	12-3a-F7-3	1	CEF	12	3a	F7	4	nodrug	0.644	0.577	0.116
12-3a-F7	12-3a-F7-3	1	CIP	12	3a	F7	4	nodrug	0.647	0.712	-0.091
12-3a-F7	12-3a-F7-3	1	GEN	12	3a	F7	4	nodrug	0.775	0.719	0.078
12-3a-F7	12-3a-F7-4	1	CIP	12	3a	F7	4	nodrug	0.691	0.712	-0.029
12-3a-F7	12-3a-F7-4	1	CEF	12	3a	F7	4	nodrug	0.608	0.577	0.054
12-3a-F7	12-3a-F7-4	1	CAR	12	3a	F7	4	nodrug	0.622	0.634	-0.019
12-3a-F7	12-3a-F7-4	1	DOR	12	3a	F7	4	nodrug	0.897	0.854	0.05
12-3a-F7	12-3a-F7-4	1	GEN	12	3a	F7	4	nodrug	0.957	0.719	0.331
12-3a-F7	12-3a-F7-5	1	DOR	12	3a	F7	4	nodrug	0.792	0.854	-0.073
12-3a-F7	12-3a-F7-5	1	CEF	12	3a	F7	4	nodrug	0.639	0.577	0.107
12-3a-F7	12-3a-F7-5	1	GEN	12	3a	F7	4	nodrug	0.863	0.719	0.2
12-3a-F7	12-3a-F7-5	1	CIP	12	3a	F7	4	nodrug	0.693	0.712	-0.027
12-3a-F7	12-3a-F7-5	1	CAR	12	3a	F7	4	nodrug	0.683	0.634	0.077
12-3a-F7	12-3a-F7-6	1	CIP	12	3a	F7	4	nodrug	0.649	0.712	-0.088
12-3a-F7	12-3a-F7-6	1	DOR	12	3a	F7	4	nodrug	0.834	0.854	-0.023
12-3a-F7	12-3a-F7-6	1	GEN	12	3a	F7	4	nodrug	0.742	0.719	0.032
12-3a-F7	12-3a-F7-6	1	CEF	12	3a	F7	4	nodrug	0.575	0.577	-0.003
12-3a-F7	12-3a-F7-6	1	CAR	12	3a	F7	4	nodrug	0.64	0.634	0.009
12-3a-F7	12-3a-F7-7	1	CIP	12	3a	F7	4	nodrug	0.67	0.712	-0.059
12-3a-F7	12-3a-F7-7	1	DOR	12	3a	F7	4	nodrug	0.712	0.854	-0.166
12-3a-F7	12-3a-F7-7	1	CEF	12	3a	F7	4	nodrug	0.652	0.577	0.13
12-3a-F7	12-3a-F7-7	1	CAR	12	3a	F7	4	nodrug	0.6	0.634	-0.054
12-3a-F7	12-3a-F7-7	1	GEN	12	3a	F7	4	nodrug	0.8	0.719	0.113
12-3a-F7	12-3a-F7-8	1	DOR	12	3a	F7	4	nodrug	0.775	0.854	-0.093
12-3a-F7	12-3a-F7-8	1	CEF	12	3a	F7	4	nodrug	0.665	0.577	0.153
12-3a-F7	12-3a-F7-8	1	GEN	12	3a	F7	4	nodrug	0.806	0.719	0.121
12-3a-F7	12-3a-F7-8	1	CAR	12	3a	F7	4	nodrug	0.671	0.634	0.058
12-3a-F7	12-3a-F7-8	1	CIP	12	3a	F7	4	nodrug	0.656	0.712	-0.079
12-3a-F7	12-3a-F7-9	1	CAR	12	3a	F7	4	nodrug	0.589	0.634	-0.071
12-3a-F7	12-3a-F7-9	1	DOR	12	3a	F7	4	nodrug	0.704	0.854	-0.176
12-3a-F7	12-3a-F7-9	1	CIP	12	3a	F7	4	nodrug	0.664	0.712	-0.067
12-3a-F7	12-3a-F7-9	1	CEF	12	3a	F7	4	nodrug	0.628	0.577	0.088
12-3a-F7	12-3a-F7-9	1	GEN	12	3a	F7	4	nodrug	0.777	0.719	0.081
12-3a-F7	12-3a-F7-anc105	anc	CEF	12	3a	F7	4	ancestor	0.525	0.577	-0.09
12-3a-F7	12-3a-F7-anc105	anc	CAR	12	3a	F7	4	ancestor	0.679	0.634	0.071
12-3a-F7	12-3a-F7-anc105	anc	GEN	12	3a	F7	4	ancestor	0.726	0.719	0.01
12-3a-F7	12-3a-F7-anc106	anc	CEF	12	3a	F7	4	ancestor	0.629	0.577	0.09
12-3a-F7	12-3a-F7-anc106	anc	CAR	12	3a	F7	4	ancestor	0.589	0.634	-0.071
12-3a-F7	12-3a-F7-anc106	anc	GEN	12	3a	F7	4	ancestor	0.712	0.719	-0.01
12-3a-F7	12-3a-F7-anc107	anc	CAR	12	3a	F7	4	ancestor	0.721	0.72	0.001
12-3a-F7	12-3a-F7-anc107	anc	CEF	12	3a	F7	4	ancestor	0.577	0.599	-0.037
12-3a-F7	12-3a-F7-anc107	anc	GEN	12	3a	F7	4	ancestor	0.838	0.824	0.017
12-3a-F7	12-3a-F7-anc108	anc	CEF	12	3a	F7	4	ancestor	0.621	0.599	0.037
12-3a-F7	12-3a-F7-anc108	anc	CAR	12	3a	F7	4	ancestor	0.718	0.72	-0.003
12-3a-F7	12-3a-F7-anc108	anc	GEN	12	3a	F7	4	ancestor	0.811	0.824	-0.016
12-3a-F7	12-3a-F7-anc5	anc	CIP	12	3a	F7	4	ancestor	0.72	0.712	0.011
12-3a-F7	12-3a-F7-anc5	anc	DOR	12	3a	F7	4	ancestor	0.835	0.854	-0.022
12-3a-F7	12-3a-F7-anc6	anc	DOR	12	3a	F7	4	ancestor	0.874	0.854	0.023
12-3a-F7	12-3a-F7-anc6	anc	CIP	12	3a	F7	4	ancestor	0.704	0.712	-0.011
12-3a-F7	12-3a-F7-anc7	anc	DOR	12	3a	F7	4	ancestor	0.912	0.846	0.078
12-3a-F7	12-3a-F7-anc7	anc	CIP	12	3a	F7	4	ancestor	0.632	0.679	-0.069
12-3a-F7	12-3a-F7-anc8	anc	DOR	12	3a	F7	4	ancestor	0.781	0.846	-0.077
12-3a-F7	12-3a-F7-anc8	anc	CIP	12	3a	F7	4	ancestor	0.726	0.679	0.069
12-3a-G1	12-3a-G1-1	1	GEN	12	3a	G1	13	random	0.966	0.86	0.123
12-3a-G1	12-3a-G1-1	1	DOR	12	3a	G1	13	random	1.134	0.806	0.407
12-3a-G1	12-3a-G1-1	1	CEF	12	3a	G1	13	random	0.983	0.59	0.666
12-3a-G1	12-3a-G1-1	1	CAR	12	3a	G1	13	random	0.711	0.583	0.22
12-3a-G1	12-3a-G1-1	1	CIP	12	3a	G1	13	random	0.752	0.68	0.106
12-3a-G1	12-3a-G1-10	1	CAR	12	3a	G1	13	random	0.757	0.583	0.298
12-3a-G1	12-3a-G1-10	1	GEN	12	3a	G1	13	random	0.841	0.86	-0.022
12-3a-G1	12-3a-G1-10	1	CIP	12	3a	G1	13	random	0.73	0.68	0.074
12-3a-G1	12-3a-G1-10	1	CEF	12	3a	G1	13	random	0.961	0.59	0.629
12-3a-G1	12-3a-G1-10	1	DOR	12	3a	G1	13	random	1.147	0.806	0.423
12-3a-G1	12-3a-G1-11	2	CIP	12	3a	G1	13	random	0.762	0.678	0.124
12-3a-G1	12-3a-G1-11	2	CEF	12	3a	G1	13	random	0.943	0.643	0.467
12-3a-G1	12-3a-G1-11	2	CAR	12	3a	G1	13	random	0.956	0.824	0.16
12-3a-G1	12-3a-G1-11	2	DOR	12	3a	G1	13	random	1.066	0.73	0.46
12-3a-G1	12-3a-G1-11	2	GEN	12	3a	G1	13	random	1.024	0.824	0.243
12-3a-G1	12-3a-G1-12	2	CEF	12	3a	G1	13	random	0.953	0.643	0.482
12-3a-G1	12-3a-G1-12	2	DOR	12	3a	G1	13	random	1.032	0.73	0.414
12-3a-G1	12-3a-G1-12	2	CIP	12	3a	G1	13	random	0.72	0.678	0.062
12-3a-G1	12-3a-G1-12	2	GEN	12	3a	G1	13	random	1.008	0.824	0.223
12-3a-G1	12-3a-G1-12	2	CAR	12	3a	G1	13	random	1.022	0.824	0.24
12-3a-G1	12-3a-G1-13	2	CIP	12	3a	G1	13	random	0.719	0.678	0.06
12-3a-G1	12-3a-G1-13	2	CAR	12	3a	G1	13	random	0.996	0.824	0.209
12-3a-G1	12-3a-G1-13	2	GEN	12	3a	G1	13	random	0.999	0.824	0.212
12-3a-G1	12-3a-G1-13	2	DOR	12	3a	G1	13	random	1.033	0.73	0.415
12-3a-G1	12-3a-G1-13	2	CEF	12	3a	G1	13	random	0.954	0.643	0.484
12-3a-G1	12-3a-G1-14	2	CIP	12	3a	G1	13	random	0.752	0.678	0.109
12-3a-G1	12-3a-G1-14	2	CEF	12	3a	G1	13	random	0.886	0.643	0.378
12-3a-G1	12-3a-G1-14	2	CAR	12	3a	G1	13	random	1.155	0.824	0.402
12-3a-G1	12-3a-G1-14	2	DOR	12	3a	G1	13	random	1.091	0.73	0.495
12-3a-G1	12-3a-G1-14	2	GEN	12	3a	G1	13	random	1.017	0.824	0.234
12-3a-G1	12-3a-G1-15	2	GEN	12	3a	G1	13	random	0.961	0.824	0.166
12-3a-G1	12-3a-G1-15	2	CAR	12	3a	G1	13	random	0.989	0.824	0.2
12-3a-G1	12-3a-G1-15	2	DOR	12	3a	G1	13	random	1.116	0.817	0.366
12-3a-G1	12-3a-G1-15	2	CIP	12	3a	G1	13	random	0.749	0.678	0.105
12-3a-G1	12-3a-G1-15	2	CEF	12	3a	G1	13	random	0.79	0.596	0.326
12-3a-G1	12-3a-G1-16	2	CAR	12	3a	G1	13	random	0.949	0.824	0.152
12-3a-G1	12-3a-G1-16	2	CEF	12	3a	G1	13	random	0.977	0.643	0.519
12-3a-G1	12-3a-G1-16	2	DOR	12	3a	G1	13	random	1.118	0.73	0.532
12-3a-G1	12-3a-G1-16	2	CIP	12	3a	G1	13	random	0.734	0.678	0.083
12-3a-G1	12-3a-G1-16	2	GEN	12	3a	G1	13	random	0.904	0.824	0.097
12-3a-G1	12-3a-G1-17	2	DOR	12	3a	G1	13	random	1.07	0.73	0.466
12-3a-G1	12-3a-G1-17	2	CIP	12	3a	G1	13	random	0.738	0.678	0.088
12-3a-G1	12-3a-G1-17	2	CEF	12	3a	G1	13	random	0.936	0.643	0.456
12-3a-G1	12-3a-G1-17	2	CAR	12	3a	G1	13	random	1.074	0.824	0.303
12-3a-G1	12-3a-G1-17	2	GEN	12	3a	G1	13	random	1.02	0.824	0.238
12-3a-G1	12-3a-G1-18	2	CAR	12	3a	G1	13	random	0.888	0.824	0.078
12-3a-G1	12-3a-G1-18	2	GEN	12	3a	G1	13	random	0.928	0.824	0.126
12-3a-G1	12-3a-G1-18	2	CEF	12	3a	G1	13	random	0.992	0.643	0.543
12-3a-G1	12-3a-G1-18	2	CIP	12	3a	G1	13	random	0.841	0.678	0.24
12-3a-G1	12-3a-G1-18	2	DOR	12	3a	G1	13	random	1.091	0.73	0.495
12-3a-G1	12-3a-G1-19	2	CAR	12	3a	G1	13	random	1.058	0.824	0.284
12-3a-G1	12-3a-G1-19	2	DOR	12	3a	G1	13	random	1.071	0.73	0.467
12-3a-G1	12-3a-G1-19	2	CIP	12	3a	G1	13	random	0.715	0.678	0.055
12-3a-G1	12-3a-G1-19	2	CEF	12	3a	G1	13	random	0.862	0.596	0.446
12-3a-G1	12-3a-G1-19	2	GEN	12	3a	G1	13	random	0.958	0.824	0.163
12-3a-G1	12-3a-G1-2	1	GEN	12	3a	G1	13	random	0.936	0.86	0.088
12-3a-G1	12-3a-G1-2	1	CIP	12	3a	G1	13	random	0.759	0.68	0.116
12-3a-G1	12-3a-G1-2	1	CEF	12	3a	G1	13	random	0.863	0.59	0.463
12-3a-G1	12-3a-G1-2	1	DOR	12	3a	G1	13	random	1.151	0.806	0.428
12-3a-G1	12-3a-G1-2	1	CAR	12	3a	G1	13	random	0.721	0.583	0.237
12-3a-G1	12-3a-G1-20	2	CEF	12	3a	G1	13	random	0.929	0.643	0.445
12-3a-G1	12-3a-G1-20	2	CIP	12	3a	G1	13	random	0.715	0.678	0.055
12-3a-G1	12-3a-G1-20	2	CAR	12	3a	G1	13	random	1.145	0.824	0.39
12-3a-G1	12-3a-G1-20	2	DOR	12	3a	G1	13	random	1.144	0.73	0.567
12-3a-G1	12-3a-G1-20	2	GEN	12	3a	G1	13	random	0.865	0.824	0.05
12-3a-G1	12-3a-G1-3	1	CAR	12	3a	G1	13	random	0.702	0.583	0.204
12-3a-G1	12-3a-G1-3	1	CIP	12	3a	G1	13	random	0.789	0.68	0.16
12-3a-G1	12-3a-G1-3	1	DOR	12	3a	G1	13	random	1.202	0.806	0.491
12-3a-G1	12-3a-G1-3	1	CEF	12	3a	G1	13	random	0.886	0.59	0.502
12-3a-G1	12-3a-G1-3	1	GEN	12	3a	G1	13	random	1.037	0.86	0.206
12-3a-G1	12-3a-G1-4	1	DOR	12	3a	G1	13	random	1.214	0.806	0.506
12-3a-G1	12-3a-G1-4	1	CEF	12	3a	G1	13	random	0.876	0.59	0.485
12-3a-G1	12-3a-G1-4	1	CAR	12	3a	G1	13	random	0.787	0.583	0.35
12-3a-G1	12-3a-G1-4	1	CIP	12	3a	G1	13	random	0.751	0.68	0.104
12-3a-G1	12-3a-G1-4	1	GEN	12	3a	G1	13	random	0.956	0.86	0.112
12-3a-G1	12-3a-G1-5	1	CAR	12	3a	G1	13	random	0.725	0.583	0.244
12-3a-G1	12-3a-G1-5	1	DOR	12	3a	G1	13	random	1.241	0.806	0.54
12-3a-G1	12-3a-G1-5	1	GEN	12	3a	G1	13	random	0.968	0.86	0.126
12-3a-G1	12-3a-G1-5	1	CIP	12	3a	G1	13	random	0.755	0.68	0.11
12-3a-G1	12-3a-G1-5	1	CEF	12	3a	G1	13	random	1.034	0.59	0.753
12-3a-G1	12-3a-G1-6	1	CEF	12	3a	G1	13	random	0.914	0.59	0.549
12-3a-G1	12-3a-G1-6	1	GEN	12	3a	G1	13	random	0.938	0.86	0.091
12-3a-G1	12-3a-G1-6	1	CAR	12	3a	G1	13	random	0.706	0.583	0.211
12-3a-G1	12-3a-G1-6	1	CIP	12	3a	G1	13	random	0.742	0.68	0.091
12-3a-G1	12-3a-G1-6	1	DOR	12	3a	G1	13	random	1.226	0.806	0.521
12-3a-G1	12-3a-G1-7	1	CIP	12	3a	G1	13	random	0.779	0.68	0.146
12-3a-G1	12-3a-G1-7	1	CAR	12	3a	G1	13	random	0.687	0.583	0.178
12-3a-G1	12-3a-G1-7	1	GEN	12	3a	G1	13	random	0.849	0.86	-0.013
12-3a-G1	12-3a-G1-7	1	DOR	12	3a	G1	13	random	1.284	0.806	0.593
12-3a-G1	12-3a-G1-7	1	CEF	12	3a	G1	13	random	0.866	0.59	0.468
12-3a-G1	12-3a-G1-8	1	CIP	12	3a	G1	13	random	0.745	0.68	0.096
12-3a-G1	12-3a-G1-8	1	DOR	12	3a	G1	13	random	1.176	0.806	0.459
12-3a-G1	12-3a-G1-8	1	GEN	12	3a	G1	13	random	0.911	0.86	0.059
12-3a-G1	12-3a-G1-8	1	CEF	12	3a	G1	13	random	1.144	0.59	0.939
12-3a-G1	12-3a-G1-8	1	CAR	12	3a	G1	13	random	0.697	0.583	0.196
12-3a-G1	12-3a-G1-9	1	GEN	12	3a	G1	13	random	0.912	0.86	0.06
12-3a-G1	12-3a-G1-9	1	CAR	12	3a	G1	13	random	0.699	0.583	0.199
12-3a-G1	12-3a-G1-9	1	DOR	12	3a	G1	13	random	1.166	0.806	0.447
12-3a-G1	12-3a-G1-9	1	CIP	12	3a	G1	13	random	0.74	0.68	0.088
12-3a-G1	12-3a-G1-9	1	CEF	12	3a	G1	13	random	0.866	0.59	0.468
12-3a-G1	12-3a-G1-anc33	anc	CAR	12	3a	G1	13	ancestor	0.567	0.583	-0.027
12-3a-G1	12-3a-G1-anc34	anc	CAR	12	3a	G1	13	ancestor	0.6	0.583	0.029
12-3a-G1	12-3a-G1-anc35	anc	CAR	12	3a	G1	13	ancestor	0.807	0.824	-0.021
12-3a-G1	12-3a-G1-anc36	anc	CAR	12	3a	G1	13	ancestor	0.841	0.824	0.021
12-3a-G1	12-3a-G1-anc77	anc	GEN	12	3a	G1	13	ancestor	0.93	0.86	0.081
12-3a-G1	12-3a-G1-anc77	anc	CEF	12	3a	G1	13	ancestor	0.534	0.59	-0.095
12-3a-G1	12-3a-G1-anc77	anc	DOR	12	3a	G1	13	ancestor	0.81	0.806	0.005
12-3a-G1	12-3a-G1-anc77	anc	CIP	12	3a	G1	13	ancestor	0.64	0.68	-0.059
12-3a-G1	12-3a-G1-anc78	anc	CEF	12	3a	G1	13	ancestor	0.645	0.59	0.093
12-3a-G1	12-3a-G1-anc78	anc	GEN	12	3a	G1	13	ancestor	0.791	0.86	-0.08
12-3a-G1	12-3a-G1-anc78	anc	CIP	12	3a	G1	13	ancestor	0.721	0.68	0.06
12-3a-G1	12-3a-G1-anc78	anc	DOR	12	3a	G1	13	ancestor	0.802	0.806	-0.005
12-3a-G1	12-3a-G1-anc79	anc	DOR	12	3a	G1	13	ancestor	0.711	0.73	-0.026
12-3a-G1	12-3a-G1-anc79	anc	CIP	12	3a	G1	13	ancestor	0.704	0.678	0.038
12-3a-G1	12-3a-G1-anc79	anc	GEN	12	3a	G1	13	ancestor	0.847	0.824	0.028
12-3a-G1	12-3a-G1-anc79	anc	CEF	12	3a	G1	13	ancestor	0.659	0.643	0.025
12-3a-G1	12-3a-G1-anc80	anc	DOR	12	3a	G1	13	ancestor	0.75	0.73	0.027
12-3a-G1	12-3a-G1-anc80	anc	CEF	12	3a	G1	13	ancestor	0.627	0.643	-0.025
12-3a-G1	12-3a-G1-anc80	anc	CIP	12	3a	G1	13	ancestor	0.652	0.678	-0.038
12-3a-G1	12-3a-G1-anc80	anc	GEN	12	3a	G1	13	ancestor	0.802	0.824	-0.027
12-3a-G7	12-3a-G7-1	1	DOR	12	3a	G7	1	mono	1.237	0.802	0.542
12-3a-G7	12-3a-G7-1	1	CEF	12	3a	G7	1	mono	0.621	0.48	0.294
12-3a-G7	12-3a-G7-1	1	CIP	12	3a	G7	1	mono	0.668	0.761	-0.122
12-3a-G7	12-3a-G7-1	1	CAR	12	3a	G7	1	mono	0.905	0.692	0.308
12-3a-G7	12-3a-G7-1	1	GEN	12	3a	G7	1	mono	0.89	0.876	0.016
12-3a-G7	12-3a-G7-10	1	DOR	12	3a	G7	1	mono	1.223	0.802	0.525
12-3a-G7	12-3a-G7-10	1	CAR	12	3a	G7	1	mono	0.916	0.692	0.324
12-3a-G7	12-3a-G7-10	1	CIP	12	3a	G7	1	mono	0.698	0.761	-0.083
12-3a-G7	12-3a-G7-10	1	GEN	12	3a	G7	1	mono	0.769	0.876	-0.122
12-3a-G7	12-3a-G7-10	1	CEF	12	3a	G7	1	mono	0.642	0.48	0.338
12-3a-G7	12-3a-G7-11	1	CEF	12	3a	G7	1	mono	0.76	0.536	0.418
12-3a-G7	12-3a-G7-11	1	DOR	12	3a	G7	1	mono	1.276	0.774	0.649
12-3a-G7	12-3a-G7-11	1	CAR	12	3a	G7	1	mono	0.839	0.705	0.19
12-3a-G7	12-3a-G7-11	1	GEN	12	3a	G7	1	mono	0.856	0.892	-0.04
12-3a-G7	12-3a-G7-11	1	CIP	12	3a	G7	1	mono	0.611	0.643	-0.05
12-3a-G7	12-3a-G7-12	1	CEF	12	3a	G7	1	mono	0.693	0.536	0.293
12-3a-G7	12-3a-G7-12	1	CAR	12	3a	G7	1	mono	0.852	0.705	0.209
12-3a-G7	12-3a-G7-12	1	DOR	12	3a	G7	1	mono	1.239	0.774	0.601
12-3a-G7	12-3a-G7-12	1	CIP	12	3a	G7	1	mono	0.616	0.643	-0.042
12-3a-G7	12-3a-G7-12	1	GEN	12	3a	G7	1	mono	0.803	0.892	-0.1
12-3a-G7	12-3a-G7-13	1	CAR	12	3a	G7	1	mono	0.841	0.705	0.193
12-3a-G7	12-3a-G7-13	1	CIP	12	3a	G7	1	mono	0.628	0.643	-0.023
12-3a-G7	12-3a-G7-13	1	GEN	12	3a	G7	1	mono	0.796	0.892	-0.108
12-3a-G7	12-3a-G7-13	1	CEF	12	3a	G7	1	mono	0.75	0.536	0.399
12-3a-G7	12-3a-G7-13	1	DOR	12	3a	G7	1	mono	1.254	0.774	0.62
12-3a-G7	12-3a-G7-14	1	CIP	12	3a	G7	1	mono	0.621	0.643	-0.034
12-3a-G7	12-3a-G7-14	1	GEN	12	3a	G7	1	mono	0.891	0.892	-0.001
12-3a-G7	12-3a-G7-14	1	CAR	12	3a	G7	1	mono	1.03	0.705	0.461
12-3a-G7	12-3a-G7-14	1	CEF	12	3a	G7	1	mono	0.756	0.536	0.41
12-3a-G7	12-3a-G7-14	1	DOR	12	3a	G7	1	mono	1.367	0.774	0.766
12-3a-G7	12-3a-G7-15	1	CEF	12	3a	G7	1	mono	0.698	0.536	0.302
12-3a-G7	12-3a-G7-15	1	DOR	12	3a	G7	1	mono	1.281	0.774	0.655
12-3a-G7	12-3a-G7-15	1	CAR	12	3a	G7	1	mono	0.931	0.705	0.321
12-3a-G7	12-3a-G7-15	1	CIP	12	3a	G7	1	mono	0.623	0.643	-0.031
12-3a-G7	12-3a-G7-15	1	GEN	12	3a	G7	1	mono	0.974	0.892	0.092
12-3a-G7	12-3a-G7-16	1	DOR	12	3a	G7	1	mono	1.248	0.774	0.612
12-3a-G7	12-3a-G7-16	1	CEF	12	3a	G7	1	mono	0.731	0.536	0.364
12-3a-G7	12-3a-G7-16	1	CAR	12	3a	G7	1	mono	0.839	0.705	0.19
12-3a-G7	12-3a-G7-16	1	CIP	12	3a	G7	1	mono	0.6	0.643	-0.067
12-3a-G7	12-3a-G7-16	1	GEN	12	3a	G7	1	mono	0.784	0.892	-0.121
12-3a-G7	12-3a-G7-17	1	DOR	12	3a	G7	1	mono	1.353	0.774	0.748
12-3a-G7	12-3a-G7-17	1	CIP	12	3a	G7	1	mono	0.696	0.643	0.082
12-3a-G7	12-3a-G7-17	1	CAR	12	3a	G7	1	mono	0.941	0.705	0.335
12-3a-G7	12-3a-G7-17	1	CEF	12	3a	G7	1	mono	0.783	0.536	0.461
12-3a-G7	12-3a-G7-17	1	GEN	12	3a	G7	1	mono	0.779	0.892	-0.127
12-3a-G7	12-3a-G7-18	1	DOR	12	3a	G7	1	mono	1.242	0.774	0.605
12-3a-G7	12-3a-G7-18	1	CIP	12	3a	G7	1	mono	0.618	0.643	-0.039
12-3a-G7	12-3a-G7-18	1	CAR	12	3a	G7	1	mono	0.908	0.705	0.288
12-3a-G7	12-3a-G7-18	1	GEN	12	3a	G7	1	mono	0.788	0.892	-0.117
12-3a-G7	12-3a-G7-18	1	CEF	12	3a	G7	1	mono	0.769	0.536	0.435
12-3a-G7	12-3a-G7-19	1	GEN	12	3a	G7	1	mono	0.76	0.892	-0.148
12-3a-G7	12-3a-G7-19	1	CEF	12	3a	G7	1	mono	0.716	0.536	0.336
12-3a-G7	12-3a-G7-19	1	DOR	12	3a	G7	1	mono	1.261	0.774	0.629
12-3a-G7	12-3a-G7-19	1	CIP	12	3a	G7	1	mono	0.621	0.643	-0.034
12-3a-G7	12-3a-G7-19	1	CAR	12	3a	G7	1	mono	0.951	0.705	0.349
12-3a-G7	12-3a-G7-2	1	CAR	12	3a	G7	1	mono	0.892	0.692	0.289
12-3a-G7	12-3a-G7-2	1	DOR	12	3a	G7	1	mono	1.301	0.802	0.622
12-3a-G7	12-3a-G7-2	1	CIP	12	3a	G7	1	mono	0.637	0.761	-0.163
12-3a-G7	12-3a-G7-2	1	CEF	12	3a	G7	1	mono	0.679	0.48	0.415
12-3a-G7	12-3a-G7-2	1	GEN	12	3a	G7	1	mono	0.745	0.876	-0.15
12-3a-G7	12-3a-G7-20	1	GEN	12	3a	G7	1	mono	0.757	0.892	-0.151
12-3a-G7	12-3a-G7-20	1	DOR	12	3a	G7	1	mono	1.223	0.774	0.58
12-3a-G7	12-3a-G7-20	1	CEF	12	3a	G7	1	mono	0.706	0.536	0.317
12-3a-G7	12-3a-G7-20	1	CAR	12	3a	G7	1	mono	0.885	0.705	0.255
12-3a-G7	12-3a-G7-20	1	CIP	12	3a	G7	1	mono	0.599	0.643	-0.068
12-3a-G7	12-3a-G7-3	1	CIP	12	3a	G7	1	mono	0.631	0.761	-0.171
12-3a-G7	12-3a-G7-3	1	CAR	12	3a	G7	1	mono	0.882	0.692	0.275
12-3a-G7	12-3a-G7-3	1	GEN	12	3a	G7	1	mono	0.792	0.876	-0.096
12-3a-G7	12-3a-G7-3	1	CEF	12	3a	G7	1	mono	0.607	0.48	0.265
12-3a-G7	12-3a-G7-3	1	DOR	12	3a	G7	1	mono	1.319	0.802	0.645
12-3a-G7	12-3a-G7-4	1	GEN	12	3a	G7	1	mono	0.857	0.876	-0.022
12-3a-G7	12-3a-G7-4	1	CIP	12	3a	G7	1	mono	0.754	0.761	-0.009
12-3a-G7	12-3a-G7-4	1	CEF	12	3a	G7	1	mono	0.707	0.48	0.473
12-3a-G7	12-3a-G7-4	1	CAR	12	3a	G7	1	mono	0.932	0.692	0.347
12-3a-G7	12-3a-G7-4	1	DOR	12	3a	G7	1	mono	1.212	0.802	0.511
12-3a-G7	12-3a-G7-5	1	CEF	12	3a	G7	1	mono	0.694	0.48	0.446
12-3a-G7	12-3a-G7-5	1	DOR	12	3a	G7	1	mono	1.232	0.802	0.536
12-3a-G7	12-3a-G7-5	1	GEN	12	3a	G7	1	mono	0.856	0.876	-0.023
12-3a-G7	12-3a-G7-5	1	CIP	12	3a	G7	1	mono	0.706	0.761	-0.072
12-3a-G7	12-3a-G7-5	1	CAR	12	3a	G7	1	mono	0.9	0.692	0.301
12-3a-G7	12-3a-G7-6	1	CIP	12	3a	G7	1	mono	0.646	0.761	-0.151
12-3a-G7	12-3a-G7-6	1	GEN	12	3a	G7	1	mono	0.804	0.876	-0.082
12-3a-G7	12-3a-G7-6	1	CAR	12	3a	G7	1	mono	0.902	0.692	0.303
12-3a-G7	12-3a-G7-6	1	CEF	12	3a	G7	1	mono	0.658	0.48	0.371
12-3a-G7	12-3a-G7-6	1	DOR	12	3a	G7	1	mono	1.319	0.802	0.645
12-3a-G7	12-3a-G7-7	1	CIP	12	3a	G7	1	mono	0.684	0.761	-0.101
12-3a-G7	12-3a-G7-7	1	GEN	12	3a	G7	1	mono	0.781	0.876	-0.108
12-3a-G7	12-3a-G7-7	1	CEF	12	3a	G7	1	mono	0.628	0.48	0.308
12-3a-G7	12-3a-G7-7	1	DOR	12	3a	G7	1	mono	1.199	0.802	0.495
12-3a-G7	12-3a-G7-7	1	CAR	12	3a	G7	1	mono	0.888	0.692	0.283
12-3a-G7	12-3a-G7-8	1	CIP	12	3a	G7	1	mono	0.703	0.761	-0.076
12-3a-G7	12-3a-G7-8	1	GEN	12	3a	G7	1	mono	0.789	0.876	-0.099
12-3a-G7	12-3a-G7-8	1	CEF	12	3a	G7	1	mono	0.784	0.48	0.633
12-3a-G7	12-3a-G7-8	1	DOR	12	3a	G7	1	mono	1.187	0.802	0.48
12-3a-G7	12-3a-G7-8	1	CAR	12	3a	G7	1	mono	0.85	0.692	0.228
12-3a-G7	12-3a-G7-9	1	DOR	12	3a	G7	1	mono	1.209	0.802	0.507
12-3a-G7	12-3a-G7-9	1	CAR	12	3a	G7	1	mono	0.94	0.692	0.358
12-3a-G7	12-3a-G7-9	1	GEN	12	3a	G7	1	mono	0.847	0.876	-0.033
12-3a-G7	12-3a-G7-9	1	CIP	12	3a	G7	1	mono	0.637	0.761	-0.163
12-3a-G7	12-3a-G7-9	1	CEF	12	3a	G7	1	mono	0.635	0.48	0.323
12-3a-G7	12-3a-G7-anc109	anc	DOR	12	3a	G7	1	ancestor	0.719	0.802	-0.103
12-3a-G7	12-3a-G7-anc109	anc	CEF	12	3a	G7	1	ancestor	0.474	0.48	-0.013
12-3a-G7	12-3a-G7-anc109	anc	CIP	12	3a	G7	1	ancestor	0.701	0.761	-0.079
12-3a-G7	12-3a-G7-anc109	anc	GEN	12	3a	G7	1	ancestor	0.895	0.876	0.022
12-3a-G7	12-3a-G7-anc109	anc	CAR	12	3a	G7	1	ancestor	0.692	0.692	0
12-3a-G7	12-3a-G7-anc110	anc	CIP	12	3a	G7	1	ancestor	0.821	0.761	0.079
12-3a-G7	12-3a-G7-anc110	anc	CEF	12	3a	G7	1	ancestor	0.487	0.48	0.015
12-3a-G7	12-3a-G7-anc110	anc	GEN	12	3a	G7	1	ancestor	0.857	0.876	-0.022
12-3a-G7	12-3a-G7-anc110	anc	CAR	12	3a	G7	1	ancestor	0.691	0.692	-0.001
12-3a-G7	12-3a-G7-anc110	anc	DOR	12	3a	G7	1	ancestor	0.885	0.802	0.103
12-3a-G7	12-3a-G7-anc111	anc	CEF	12	3a	G7	1	ancestor	0.52	0.536	-0.03
12-3a-G7	12-3a-G7-anc111	anc	GEN	12	3a	G7	1	ancestor	0.844	0.892	-0.054
12-3a-G7	12-3a-G7-anc111	anc	CAR	12	3a	G7	1	ancestor	0.691	0.705	-0.02
12-3a-G7	12-3a-G7-anc111	anc	CIP	12	3a	G7	1	ancestor	0.607	0.643	-0.056
12-3a-G7	12-3a-G7-anc111	anc	DOR	12	3a	G7	1	ancestor	0.714	0.774	-0.078
12-3a-G7	12-3a-G7-anc112	anc	DOR	12	3a	G7	1	ancestor	0.835	0.774	0.079
12-3a-G7	12-3a-G7-anc112	anc	GEN	12	3a	G7	1	ancestor	0.941	0.892	0.055
12-3a-G7	12-3a-G7-anc112	anc	CIP	12	3a	G7	1	ancestor	0.678	0.643	0.054
12-3a-G7	12-3a-G7-anc112	anc	CAR	12	3a	G7	1	ancestor	0.719	0.705	0.02
12-3a-G7	12-3a-G7-anc112	anc	CEF	12	3a	G7	1	ancestor	0.552	0.536	0.03
12-3a-H3	12-3a-H3-1	1	CAR	12	3a	H3	15	random	0.565	0.687	-0.178
12-3a-H3	12-3a-H3-1	1	GEN	12	3a	H3	15	random	0.528	0.868	-0.392
12-3a-H3	12-3a-H3-1	1	CIP	12	3a	H3	15	random	0.568	0.698	-0.186
12-3a-H3	12-3a-H3-1	1	CEF	12	3a	H3	15	random	0.769	0.588	0.308
12-3a-H3	12-3a-H3-1	1	DOR	12	3a	H3	15	random	1.071	0.92	0.164
12-3a-H3	12-3a-H3-10	1	CEF	12	3a	H3	15	random	0.743	0.588	0.264
12-3a-H3	12-3a-H3-10	1	DOR	12	3a	H3	15	random	1.055	0.92	0.147
12-3a-H3	12-3a-H3-10	1	CIP	12	3a	H3	15	random	0.577	0.698	-0.173
12-3a-H3	12-3a-H3-10	1	GEN	12	3a	H3	15	random	0.517	0.868	-0.404
12-3a-H3	12-3a-H3-10	1	CAR	12	3a	H3	15	random	0.613	0.687	-0.108
12-3a-H3	12-3a-H3-11	1	CEF	12	3a	H3	15	random	0.728	0.5	0.456
12-3a-H3	12-3a-H3-11	1	DOR	12	3a	H3	15	random	1.161	0.889	0.306
12-3a-H3	12-3a-H3-11	1	CAR	12	3a	H3	15	random	0.604	0.651	-0.072
12-3a-H3	12-3a-H3-11	1	GEN	12	3a	H3	15	random	0.528	0.903	-0.415
12-3a-H3	12-3a-H3-11	1	CIP	12	3a	H3	15	random	0.54	0.696	-0.224
12-3a-H3	12-3a-H3-12	1	CEF	12	3a	H3	15	random	0.745	0.5	0.49
12-3a-H3	12-3a-H3-12	1	CIP	12	3a	H3	15	random	0.562	0.696	-0.193
12-3a-H3	12-3a-H3-12	1	CAR	12	3a	H3	15	random	0.611	0.651	-0.061
12-3a-H3	12-3a-H3-12	1	GEN	12	3a	H3	15	random	0.539	0.903	-0.403
12-3a-H3	12-3a-H3-12	1	DOR	12	3a	H3	15	random	1.139	0.889	0.281
12-3a-H3	12-3a-H3-13	1	CAR	12	3a	H3	15	random	0.607	0.651	-0.068
12-3a-H3	12-3a-H3-13	1	CEF	12	3a	H3	15	random	0.739	0.5	0.478
12-3a-H3	12-3a-H3-13	1	GEN	12	3a	H3	15	random	0.529	0.903	-0.414
12-3a-H3	12-3a-H3-13	1	DOR	12	3a	H3	15	random	1.118	0.889	0.258
12-3a-H3	12-3a-H3-13	1	CIP	12	3a	H3	15	random	0.553	0.696	-0.205
12-3a-H3	12-3a-H3-14	1	GEN	12	3a	H3	15	random	0.529	0.903	-0.414
12-3a-H3	12-3a-H3-14	1	CIP	12	3a	H3	15	random	0.565	0.696	-0.188
12-3a-H3	12-3a-H3-14	1	CAR	12	3a	H3	15	random	0.606	0.651	-0.069
12-3a-H3	12-3a-H3-14	1	CEF	12	3a	H3	15	random	0.752	0.5	0.504
12-3a-H3	12-3a-H3-14	1	DOR	12	3a	H3	15	random	1.108	0.889	0.246
12-3a-H3	12-3a-H3-15	1	GEN	12	3a	H3	15	random	0.545	0.903	-0.396
12-3a-H3	12-3a-H3-15	1	CIP	12	3a	H3	15	random	0.573	0.696	-0.177
12-3a-H3	12-3a-H3-15	1	DOR	12	3a	H3	15	random	1.105	0.889	0.243
12-3a-H3	12-3a-H3-15	1	CEF	12	3a	H3	15	random	0.732	0.5	0.464
12-3a-H3	12-3a-H3-15	1	CAR	12	3a	H3	15	random	0.592	0.651	-0.091
12-3a-H3	12-3a-H3-16	1	CIP	12	3a	H3	15	random	0.561	0.696	-0.194
12-3a-H3	12-3a-H3-16	1	DOR	12	3a	H3	15	random	1.157	0.889	0.301
12-3a-H3	12-3a-H3-16	1	CEF	12	3a	H3	15	random	0.774	0.5	0.548
12-3a-H3	12-3a-H3-16	1	CAR	12	3a	H3	15	random	0.622	0.651	-0.045
12-3a-H3	12-3a-H3-16	1	GEN	12	3a	H3	15	random	0.545	0.903	-0.396
12-3a-H3	12-3a-H3-17	1	CAR	12	3a	H3	15	random	0.602	0.651	-0.075
12-3a-H3	12-3a-H3-17	1	CIP	12	3a	H3	15	random	0.558	0.696	-0.198
12-3a-H3	12-3a-H3-17	1	GEN	12	3a	H3	15	random	0.524	0.903	-0.42
12-3a-H3	12-3a-H3-17	1	CEF	12	3a	H3	15	random	0.757	0.5	0.514
12-3a-H3	12-3a-H3-17	1	DOR	12	3a	H3	15	random	1.102	0.889	0.24
12-3a-H3	12-3a-H3-18	1	CIP	12	3a	H3	15	random	0.575	0.696	-0.174
12-3a-H3	12-3a-H3-18	1	GEN	12	3a	H3	15	random	0.565	0.903	-0.374
12-3a-H3	12-3a-H3-18	1	CAR	12	3a	H3	15	random	0.636	0.651	-0.023
12-3a-H3	12-3a-H3-18	1	CEF	12	3a	H3	15	random	0.736	0.5	0.472
12-3a-H3	12-3a-H3-18	1	DOR	12	3a	H3	15	random	1.11	0.889	0.249
12-3a-H3	12-3a-H3-19	1	GEN	12	3a	H3	15	random	0.614	0.903	-0.32
12-3a-H3	12-3a-H3-19	1	CAR	12	3a	H3	15	random	0.761	0.651	0.169
12-3a-H3	12-3a-H3-19	1	DOR	12	3a	H3	15	random	1.298	0.889	0.46
12-3a-H3	12-3a-H3-19	1	CIP	12	3a	H3	15	random	0.657	0.696	-0.056
12-3a-H3	12-3a-H3-19	1	CEF	12	3a	H3	15	random	0.857	0.5	0.714
12-3a-H3	12-3a-H3-2	1	CEF	12	3a	H3	15	random	0.902	0.588	0.534
12-3a-H3	12-3a-H3-2	1	DOR	12	3a	H3	15	random	1.338	0.92	0.454
12-3a-H3	12-3a-H3-2	1	CIP	12	3a	H3	15	random	0.653	0.698	-0.064
12-3a-H3	12-3a-H3-2	1	CAR	12	3a	H3	15	random	0.75	0.687	0.092
12-3a-H3	12-3a-H3-2	1	GEN	12	3a	H3	15	random	0.589	0.868	-0.321
12-3a-H3	12-3a-H3-20	1	DOR	12	3a	H3	15	random	1.117	0.889	0.256
12-3a-H3	12-3a-H3-20	1	CAR	12	3a	H3	15	random	0.562	0.651	-0.137
12-3a-H3	12-3a-H3-20	1	CIP	12	3a	H3	15	random	0.552	0.696	-0.207
12-3a-H3	12-3a-H3-20	1	GEN	12	3a	H3	15	random	0.518	0.903	-0.426
12-3a-H3	12-3a-H3-20	1	CEF	12	3a	H3	15	random	0.715	0.5	0.43
12-3a-H3	12-3a-H3-3	1	CEF	12	3a	H3	15	random	0.757	0.588	0.287
12-3a-H3	12-3a-H3-3	1	CIP	12	3a	H3	15	random	0.586	0.698	-0.16
12-3a-H3	12-3a-H3-3	1	DOR	12	3a	H3	15	random	1.032	0.92	0.122
12-3a-H3	12-3a-H3-3	1	GEN	12	3a	H3	15	random	0.537	0.868	-0.381
12-3a-H3	12-3a-H3-3	1	CAR	12	3a	H3	15	random	0.571	0.687	-0.169
12-3a-H3	12-3a-H3-4	1	GEN	12	3a	H3	15	random	0.543	0.868	-0.374
12-3a-H3	12-3a-H3-4	1	CEF	12	3a	H3	15	random	0.764	0.588	0.299
12-3a-H3	12-3a-H3-4	1	DOR	12	3a	H3	15	random	1.047	0.92	0.138
12-3a-H3	12-3a-H3-4	1	CAR	12	3a	H3	15	random	0.599	0.687	-0.128
12-3a-H3	12-3a-H3-4	1	CIP	12	3a	H3	15	random	0.583	0.698	-0.165
12-3a-H3	12-3a-H3-5	1	CIP	12	3a	H3	15	random	0.648	0.698	-0.072
12-3a-H3	12-3a-H3-5	1	CEF	12	3a	H3	15	random	0.887	0.588	0.509
12-3a-H3	12-3a-H3-5	1	DOR	12	3a	H3	15	random	1.199	0.92	0.303
12-3a-H3	12-3a-H3-5	1	GEN	12	3a	H3	15	random	0.596	0.868	-0.313
12-3a-H3	12-3a-H3-5	1	CAR	12	3a	H3	15	random	0.817	0.687	0.189
12-3a-H3	12-3a-H3-6	1	CIP	12	3a	H3	15	random	0.56	0.698	-0.198
12-3a-H3	12-3a-H3-6	1	DOR	12	3a	H3	15	random	1.016	0.92	0.104
12-3a-H3	12-3a-H3-6	1	CAR	12	3a	H3	15	random	0.614	0.687	-0.106
12-3a-H3	12-3a-H3-6	1	GEN	12	3a	H3	15	random	0.51	0.868	-0.412
12-3a-H3	12-3a-H3-6	1	CEF	12	3a	H3	15	random	0.745	0.588	0.267
12-3a-H3	12-3a-H3-7	1	CAR	12	3a	H3	15	random	0.613	0.687	-0.108
12-3a-H3	12-3a-H3-7	1	DOR	12	3a	H3	15	random	1.017	0.92	0.105
12-3a-H3	12-3a-H3-7	1	CEF	12	3a	H3	15	random	0.759	0.588	0.291
12-3a-H3	12-3a-H3-7	1	CIP	12	3a	H3	15	random	0.563	0.698	-0.193
12-3a-H3	12-3a-H3-7	1	GEN	12	3a	H3	15	random	0.529	0.868	-0.391
12-3a-H3	12-3a-H3-8	1	CIP	12	3a	H3	15	random	0.574	0.698	-0.178
12-3a-H3	12-3a-H3-8	1	GEN	12	3a	H3	15	random	0.564	0.868	-0.35
12-3a-H3	12-3a-H3-8	1	CAR	12	3a	H3	15	random	0.698	0.687	0.016
12-3a-H3	12-3a-H3-8	1	DOR	12	3a	H3	15	random	1.037	0.92	0.127
12-3a-H3	12-3a-H3-8	1	CEF	12	3a	H3	15	random	0.814	0.588	0.384
12-3a-H3	12-3a-H3-9	1	GEN	12	3a	H3	15	random	0.525	0.868	-0.395
12-3a-H3	12-3a-H3-9	1	DOR	12	3a	H3	15	random	1.019	0.92	0.108
12-3a-H3	12-3a-H3-9	1	CAR	12	3a	H3	15	random	0.611	0.687	-0.111
12-3a-H3	12-3a-H3-9	1	CEF	12	3a	H3	15	random	0.744	0.588	0.265
12-3a-H3	12-3a-H3-9	1	CIP	12	3a	H3	15	random	0.579	0.698	-0.17
12-3a-H3	12-3a-H3-anc65	anc	CIP	12	3a	H3	15	ancestor	0.656	0.698	-0.06
12-3a-H3	12-3a-H3-anc65	anc	GEN	12	3a	H3	15	ancestor	0.838	0.868	-0.035
12-3a-H3	12-3a-H3-anc65	anc	DOR	12	3a	H3	15	ancestor	0.945	0.92	0.027
12-3a-H3	12-3a-H3-anc65	anc	CAR	12	3a	H3	15	ancestor	0.69	0.687	0.004
12-3a-H3	12-3a-H3-anc65	anc	CEF	12	3a	H3	15	ancestor	0.554	0.588	-0.058
12-3a-H3	12-3a-H3-anc66	anc	GEN	12	3a	H3	15	ancestor	0.899	0.868	0.036
12-3a-H3	12-3a-H3-anc66	anc	CIP	12	3a	H3	15	ancestor	0.74	0.698	0.06
12-3a-H3	12-3a-H3-anc66	anc	DOR	12	3a	H3	15	ancestor	0.895	0.92	-0.027
12-3a-H3	12-3a-H3-anc66	anc	CAR	12	3a	H3	15	ancestor	0.684	0.687	-0.004
12-3a-H3	12-3a-H3-anc66	anc	CEF	12	3a	H3	15	ancestor	0.622	0.588	0.058
12-3a-H3	12-3a-H3-anc67	anc	CIP	12	3a	H3	15	ancestor	0.655	0.696	-0.059
12-3a-H3	12-3a-H3-anc67	anc	GEN	12	3a	H3	15	ancestor	0.9	0.903	-0.003
12-3a-H3	12-3a-H3-anc67	anc	CAR	12	3a	H3	15	ancestor	0.668	0.651	0.026
12-3a-H3	12-3a-H3-anc67	anc	DOR	12	3a	H3	15	ancestor	0.917	0.889	0.031
12-3a-H3	12-3a-H3-anc67	anc	CEF	12	3a	H3	15	ancestor	0.488	0.5	-0.024
12-3a-H3	12-3a-H3-anc68	anc	CEF	12	3a	H3	15	ancestor	0.513	0.5	0.026
12-3a-H3	12-3a-H3-anc68	anc	DOR	12	3a	H3	15	ancestor	0.861	0.889	-0.031
12-3a-H3	12-3a-H3-anc68	anc	CIP	12	3a	H3	15	ancestor	0.738	0.696	0.06
12-3a-H3	12-3a-H3-anc68	anc	GEN	12	3a	H3	15	ancestor	0.905	0.903	0.002
12-3a-H3	12-3a-H3-anc68	anc	CAR	12	3a	H3	15	ancestor	0.633	0.651	-0.028
12-3a-H7	12-3a-H7-1	1	CEF	12	3a	H7	16	random	0.751	0.51	0.473
12-3a-H7	12-3a-H7-1	1	CIP	12	3a	H7	16	random	0.861	0.712	0.209
12-3a-H7	12-3a-H7-1	1	DOR	12	3a	H7	16	random	1.107	0.923	0.199
12-3a-H7	12-3a-H7-1	1	CAR	12	3a	H7	16	random	1.01	0.639	0.581
12-3a-H7	12-3a-H7-1	1	GEN	12	3a	H7	16	random	0.86	0.924	-0.069
12-3a-H7	12-3a-H7-10	1	CIP	12	3a	H7	16	random	0.822	0.712	0.154
12-3a-H7	12-3a-H7-10	1	CAR	12	3a	H7	16	random	0.956	0.639	0.496
12-3a-H7	12-3a-H7-10	1	DOR	12	3a	H7	16	random	0.978	0.923	0.06
12-3a-H7	12-3a-H7-10	1	CEF	12	3a	H7	16	random	0.856	0.51	0.678
12-3a-H7	12-3a-H7-10	1	GEN	12	3a	H7	16	random	0.73	0.924	-0.21
12-3a-H7	12-3a-H7-11	1	CEF	12	3a	H7	16	random	0.709	0.53	0.338
12-3a-H7	12-3a-H7-11	1	DOR	12	3a	H7	16	random	1.127	0.916	0.23
12-3a-H7	12-3a-H7-11	1	CIP	12	3a	H7	16	random	0.847	0.736	0.151
12-3a-H7	12-3a-H7-11	1	CAR	12	3a	H7	16	random	0.991	0.722	0.373
12-3a-H7	12-3a-H7-11	1	GEN	12	3a	H7	16	random	0.713	0.955	-0.253
12-3a-H7	12-3a-H7-12	1	GEN	12	3a	H7	16	random	0.723	0.955	-0.243
12-3a-H7	12-3a-H7-12	1	CIP	12	3a	H7	16	random	0.885	0.736	0.202
12-3a-H7	12-3a-H7-12	1	CEF	12	3a	H7	16	random	0.729	0.53	0.375
12-3a-H7	12-3a-H7-12	1	DOR	12	3a	H7	16	random	0.97	0.916	0.059
12-3a-H7	12-3a-H7-12	1	CAR	12	3a	H7	16	random	1.014	0.722	0.404
12-3a-H7	12-3a-H7-13	1	DOR	12	3a	H7	16	random	0.955	0.916	0.043
12-3a-H7	12-3a-H7-13	1	CAR	12	3a	H7	16	random	1.113	0.722	0.542
12-3a-H7	12-3a-H7-13	1	GEN	12	3a	H7	16	random	0.778	0.955	-0.185
12-3a-H7	12-3a-H7-13	1	CEF	12	3a	H7	16	random	0.687	0.53	0.296
12-3a-H7	12-3a-H7-13	1	CIP	12	3a	H7	16	random	0.869	0.736	0.181
12-3a-H7	12-3a-H7-14	1	CAR	12	3a	H7	16	random	1.108	0.722	0.535
12-3a-H7	12-3a-H7-14	1	GEN	12	3a	H7	16	random	0.708	0.955	-0.259
12-3a-H7	12-3a-H7-14	1	CEF	12	3a	H7	16	random	0.728	0.53	0.374
12-3a-H7	12-3a-H7-14	1	CIP	12	3a	H7	16	random	0.814	0.736	0.106
12-3a-H7	12-3a-H7-14	1	DOR	12	3a	H7	16	random	1.03	0.916	0.124
12-3a-H7	12-3a-H7-15	1	GEN	12	3a	H7	16	random	0.695	0.955	-0.272
12-3a-H7	12-3a-H7-15	1	CAR	12	3a	H7	16	random	1.035	0.722	0.434
12-3a-H7	12-3a-H7-15	1	DOR	12	3a	H7	16	random	1.049	0.916	0.145
12-3a-H7	12-3a-H7-15	1	CEF	12	3a	H7	16	random	0.819	0.53	0.545
12-3a-H7	12-3a-H7-15	1	CIP	12	3a	H7	16	random	0.9	0.736	0.223
12-3a-H7	12-3a-H7-16	1	GEN	12	3a	H7	16	random	0.777	0.955	-0.186
12-3a-H7	12-3a-H7-16	1	CEF	12	3a	H7	16	random	0.697	0.53	0.315
12-3a-H7	12-3a-H7-16	1	DOR	12	3a	H7	16	random	1.011	0.916	0.104
12-3a-H7	12-3a-H7-16	1	CIP	12	3a	H7	16	random	0.878	0.736	0.193
12-3a-H7	12-3a-H7-16	1	CAR	12	3a	H7	16	random	0.947	0.722	0.312
12-3a-H7	12-3a-H7-17	1	CEF	12	3a	H7	16	random	0.696	0.53	0.313
12-3a-H7	12-3a-H7-17	1	GEN	12	3a	H7	16	random	0.728	0.955	-0.238
12-3a-H7	12-3a-H7-17	1	DOR	12	3a	H7	16	random	0.951	0.916	0.038
12-3a-H7	12-3a-H7-17	1	CAR	12	3a	H7	16	random	0.983	0.722	0.361
12-3a-H7	12-3a-H7-17	1	CIP	12	3a	H7	16	random	0.805	0.736	0.094
12-3a-H7	12-3a-H7-18	1	CIP	12	3a	H7	16	random	0.826	0.736	0.122
12-3a-H7	12-3a-H7-18	1	CAR	12	3a	H7	16	random	1.006	0.722	0.393
12-3a-H7	12-3a-H7-18	1	DOR	12	3a	H7	16	random	1.021	0.916	0.115
12-3a-H7	12-3a-H7-18	1	GEN	12	3a	H7	16	random	0.667	0.955	-0.302
12-3a-H7	12-3a-H7-18	1	CEF	12	3a	H7	16	random	0.683	0.53	0.289
12-3a-H7	12-3a-H7-19	2	CAR	12	3a	H7	16	random	0.982	0.722	0.36
12-3a-H7	12-3a-H7-19	2	CEF	12	3a	H7	16	random	0.81	0.53	0.528
12-3a-H7	12-3a-H7-19	2	DOR	12	3a	H7	16	random	1.225	0.916	0.337
12-3a-H7	12-3a-H7-19	2	GEN	12	3a	H7	16	random	0.993	0.955	0.04
12-3a-H7	12-3a-H7-19	2	CIP	12	3a	H7	16	random	0.802	0.736	0.09
12-3a-H7	12-3a-H7-2	1	CIP	12	3a	H7	16	random	0.807	0.712	0.133
12-3a-H7	12-3a-H7-2	1	DOR	12	3a	H7	16	random	1.152	0.923	0.248
12-3a-H7	12-3a-H7-2	1	GEN	12	3a	H7	16	random	0.707	0.924	-0.235
12-3a-H7	12-3a-H7-2	1	CAR	12	3a	H7	16	random	0.915	0.639	0.432
12-3a-H7	12-3a-H7-2	1	CEF	12	3a	H7	16	random	0.74	0.51	0.451
12-3a-H7	12-3a-H7-20	1	GEN	12	3a	H7	16	random	0.708	0.976	-0.275
12-3a-H7	12-3a-H7-20	1	CAR	12	3a	H7	16	random	1.026	0.722	0.421
12-3a-H7	12-3a-H7-20	1	CEF	12	3a	H7	16	random	0.773	0.53	0.458
12-3a-H7	12-3a-H7-20	1	DOR	12	3a	H7	16	random	1.104	0.916	0.205
12-3a-H7	12-3a-H7-20	1	CIP	12	3a	H7	16	random	0.842	0.736	0.144
12-3a-H7	12-3a-H7-3	1	GEN	12	3a	H7	16	random	0.757	0.924	-0.181
12-3a-H7	12-3a-H7-3	1	CAR	12	3a	H7	16	random	1	0.639	0.565
12-3a-H7	12-3a-H7-3	1	CEF	12	3a	H7	16	random	0.686	0.51	0.345
12-3a-H7	12-3a-H7-3	1	CIP	12	3a	H7	16	random	0.857	0.712	0.204
12-3a-H7	12-3a-H7-3	1	DOR	12	3a	H7	16	random	0.962	0.923	0.042
12-3a-H7	12-3a-H7-4	1	GEN	12	3a	H7	16	random	0.671	0.924	-0.274
12-3a-H7	12-3a-H7-4	1	CAR	12	3a	H7	16	random	1.029	0.639	0.61
12-3a-H7	12-3a-H7-4	1	CIP	12	3a	H7	16	random	0.809	0.712	0.136
12-3a-H7	12-3a-H7-4	1	CEF	12	3a	H7	16	random	0.746	0.51	0.463
12-3a-H7	12-3a-H7-4	1	DOR	12	3a	H7	16	random	1.124	0.923	0.218
12-3a-H7	12-3a-H7-5	1	CEF	12	3a	H7	16	random	0.73	0.51	0.431
12-3a-H7	12-3a-H7-5	1	GEN	12	3a	H7	16	random	0.746	0.924	-0.193
12-3a-H7	12-3a-H7-5	1	CIP	12	3a	H7	16	random	0.799	0.712	0.122
12-3a-H7	12-3a-H7-5	1	CAR	12	3a	H7	16	random	0.934	0.639	0.462
12-3a-H7	12-3a-H7-5	1	DOR	12	3a	H7	16	random	1.032	0.923	0.118
[truncated: 2,071 more rows]
