# Supplementary material for: High potency of sequential therapy with only β-lactam antibiotics
Source: eLife. 2021 Jul 28;10:e68876. doi: 10.7554/eLife.68876 (PMC8456660; doi:10.7554/eLife.68876)
Supplement: Figure 3—figure supplement 1—source data 1. [file elife-68876-fig3-figsupp1-data1.xlsx]

## Sheet: CAR-CAR Hys
Timepoint	Replicate	Treatment	Count	Dilution	Cfu.ul	Cfu.ml
-0.25	1	Post secondary growth	18	3	2571.43	2.57143e+06
-0.25	1	Post secondary growth	18	3	2571.43	2.57143e+06
-0.25	1	Post secondary growth	17	3	2428.57	2.42857e+06
-0.25	1	Post secondary growth	18	3	2571.43	2.57143e+06
-0.25	2	Post secondary growth	19	3	2714.29	2.71429e+06
-0.25	2	Post secondary growth	14	3	2000	2000000
-0.25	2	Post secondary growth	18	3	2571.43	2.57143e+06
-0.25	2	Post secondary growth	16	3	2285.71	2.28571e+06
-0.25	3	Post secondary growth	19	3	2714.29	2.71429e+06
-0.25	3	Post secondary growth	20	3	2857.14	2.85714e+06
-0.25	3	Post secondary growth	17	3	2428.57	2.42857e+06
-0.25	3	Post secondary growth	16	3	2285.71	2.28571e+06
0	1	Antibiotic switch	12	3	1714.29	1.71429e+06
0	1	Antibiotic switch	13	3	1857.14	1.85714e+06
0	1	No antibiotic	17	3	2428.57	2.42857e+06
0	1	Pretreatment only	13	3	1857.14	1.85714e+06
0	1	Maintreatment only	27	3	3857.14	3.85714e+06
0	1	Antibiotic switch	18	3	2571.43	2.57143e+06
0	1	Pretreatment only	17	3	2428.57	2.42857e+06
0	1	Maintreatment only	22	3	3142.86	3.14286e+06
0	1	No antibiotic	26	3	3714.29	3.71429e+06
0	1	Maintreatment only	26	3	3714.29	3.71429e+06
0	1	Pretreatment only	18	3	2571.43	2.57143e+06
0	1	No antibiotic	26	3	3714.29	3.71429e+06
0	1	No antibiotic	23	3	3285.71	3.28571e+06
0	1	Pretreatment only	12	3	1714.29	1.71429e+06
0	1	Antibiotic switch	7	3	1000	1000000
0	1	Maintreatment only	20	3	2857.14	2.85714e+06
0	2	Antibiotic switch	17	3	2428.57	2.42857e+06
0	2	Antibiotic switch	12	3	1714.29	1.71429e+06
0	2	No antibiotic	23	3	3285.71	3.28571e+06
0	2	Pretreatment only	11	3	1571.43	1.57143e+06
0	2	Maintreatment only	25	3	3571.43	3.57143e+06
0	2	Antibiotic switch	13	3	1857.14	1.85714e+06
0	2	Pretreatment only	12	3	1714.29	1.71429e+06
0	2	Maintreatment only	21	3	3000	3000000
0	2	No antibiotic	24	3	3428.57	3.42857e+06
0	2	Maintreatment only	19	3	2714.29	2.71429e+06
0	2	Pretreatment only	15	3	2142.86	2.14286e+06
0	2	No antibiotic	19	3	2714.29	2.71429e+06
0	2	No antibiotic	19	3	2714.29	2.71429e+06
0	2	Pretreatment only	26	2	371.429	371429
0	2	Antibiotic switch	25	2	357.143	357143
0	2	Maintreatment only	17	3	2428.57	2.42857e+06
0	3	Antibiotic switch	17	3	2428.57	2.42857e+06
0	3	Antibiotic switch	14	3	2000	2000000
0	3	No antibiotic	23	3	3285.71	3.28571e+06
0	3	Pretreatment only	10	3	1428.57	1.42857e+06
0	3	Maintreatment only	22	3	3142.86	3.14286e+06
0	3	Antibiotic switch	13	3	1857.14	1.85714e+06
0	3	Pretreatment only	11	3	1571.43	1.57143e+06
0	3	Maintreatment only	20	3	2857.14	2.85714e+06
0	3	No antibiotic	21	3	3000	3000000
0	3	Maintreatment only	23	3	3285.71	3.28571e+06
0	3	Pretreatment only	12	3	1714.29	1.71429e+06
0	3	No antibiotic	25	3	3571.43	3.57143e+06
0	3	No antibiotic	18	3	2571.43	2.57143e+06
0	3	Pretreatment only	15	3	2142.86	2.14286e+06
0	3	Antibiotic switch	16	3	2285.71	2.28571e+06
0	3	Maintreatment only	20	3	2857.14	2.85714e+06
4	1	Antibiotic switch	17	3	2428.57	2.42857e+06
4	1	Antibiotic switch	14	3	2000	2000000
4	1	No antibiotic	14	5	200000	200000000
4	1	Pretreatment only	27	5	385714	3.85714e+08
4	1	Maintreatment only	21	3	3000	3000000
4	1	Antibiotic switch	19	3	2714.29	2.71429e+06
4	1	Pretreatment only	24	5	342857	3.42857e+08
4	1	Maintreatment only	22	3	3142.86	3.14286e+06
4	1	No antibiotic	21	5	300000	300000000
4	1	Maintreatment only	24	3	3428.57	3.42857e+06
4	1	Pretreatment only	12	5	171429	1.71429e+08
4	1	No antibiotic	24	5	342857	3.42857e+08
4	1	No antibiotic	20	5	285714	2.85714e+08
4	1	Pretreatment only	21	5	300000	300000000
4	1	Antibiotic switch	21	3	3000	3000000
4	1	Maintreatment only	24	3	3428.57	3.42857e+06
4	2	Antibiotic switch	18	3	2571.43	2.57143e+06
4	2	Antibiotic switch	24	3	3428.57	3.42857e+06
4	2	No antibiotic	21	5	300000	300000000
4	2	Pretreatment only	22	5	314286	3.14286e+08
4	2	Maintreatment only	23	3	3285.71	3.28571e+06
4	2	Antibiotic switch	21	3	3000	3000000
4	2	Pretreatment only	21	5	300000	300000000
4	2	Maintreatment only	12	4	17142.9	1.71429e+07
4	2	No antibiotic	27	5	385714	3.85714e+08
4	2	Maintreatment only	22	3	3142.86	3.14286e+06
4	2	Pretreatment only	23	5	328571	3.28571e+08
4	2	No antibiotic	23	5	328571	3.28571e+08
4	2	No antibiotic	26	5	371429	3.71429e+08
4	2	Pretreatment only	22	5	314286	3.14286e+08
4	2	Antibiotic switch	20	3	2857.14	2.85714e+06
4	2	Maintreatment only	21	3	3000	3000000
4	3	Antibiotic switch	25	3	3571.43	3.57143e+06
4	3	Antibiotic switch	21	3	3000	3000000
4	3	No antibiotic	22	5	314286	3.14286e+08
4	3	Pretreatment only	20	5	285714	2.85714e+08
4	3	Maintreatment only	27	3	3857.14	3.85714e+06
4	3	Antibiotic switch	23	3	3285.71	3.28571e+06
4	3	Pretreatment only	20	5	285714	2.85714e+08
4	3	Maintreatment only	26	3	3714.29	3.71429e+06
4	3	No antibiotic	22	5	314286	3.14286e+08
4	3	Maintreatment only	22	3	3142.86	3.14286e+06
4	3	Pretreatment only	22	5	314286	3.14286e+08
4	3	No antibiotic	18	5	257143	2.57143e+08
4	3	No antibiotic	22	5	314286	3.14286e+08
4	3	Pretreatment only	21	5	300000	300000000
4	3	Antibiotic switch	16	3	2285.71	2.28571e+06
4	3	Maintreatment only	26	3	3714.29	3.71429e+06
8	1	Antibiotic switch	40	2	571.429	571429
8	1	Antibiotic switch	33	2	471.429	471429
8	1	No antibiotic	42	5	600000	600000000
8	1	Pretreatment only	44	5	628571	6.28571e+08
8	1	Maintreatment only	19	3	2714.29	2.71429e+06
8	1	Antibiotic switch	31	2	442.857	442857
8	1	Pretreatment only			0	0
8	1	Maintreatment only	14	3	2000	2000000
8	1	No antibiotic	6	6	857143	8.57143e+08
8	1	Maintreatment only	14	3	2000	2000000
8	1	Pretreatment only	14	6	2000000	2000000000
8	1	No antibiotic	9	6	1.28571e+06	1285714286
8	1	No antibiotic	6	6	857143	8.57143e+08
8	1	Pretreatment only	51	5	728571	7.28571e+08
8	1	Antibiotic switch	30	2	428.571	428571
8	1	Maintreatment only	13	3	1857.14	1.85714e+06
8	2	Antibiotic switch	52	2	742.857	742857
8	2	Antibiotic switch	39	2	557.143	557143
8	2	No antibiotic	15	6	2.14286e+06	2142857143
8	2	Pretreatment only	34	5	485714	4.85714e+08
8	2	Maintreatment only	8	3	1142.86	1.14286e+06
8	2	Antibiotic switch	27	2	385.714	385714
8	2	Pretreatment only	8	6	1.14286e+06	1142857143
8	2	Maintreatment only	16	3	2285.71	2.28571e+06
8	2	No antibiotic	12	6	1.71429e+06	1714285714
8	2	Maintreatment only	9	3	1285.71	1.28571e+06
8	2	Pretreatment only	6	6	857143	8.57143e+08
8	2	No antibiotic	8	6	1.14286e+06	1142857143
8	2	No antibiotic	8	6	1.14286e+06	1142857143
8	2	Pretreatment only	9	6	1.28571e+06	1285714286
8	2	Antibiotic switch	26	2	371.429	371429
8	2	Maintreatment only	10	3	1428.57	1.42857e+06
8	3	Antibiotic switch	16	3	2285.71	2.28571e+06
8	3	Antibiotic switch	11	3	1571.43	1.57143e+06
8	3	No antibiotic	8	6	1.14286e+06	1142857143
8	3	Pretreatment only	5	6	714286	7.14286e+08
8	3	Maintreatment only	9	3	1285.71	1.28571e+06
8	3	Antibiotic switch	11	3	1571.43	1.57143e+06
8	3	Pretreatment only	8	6	1.14286e+06	1142857143
8	3	Maintreatment only	18	3	2571.43	2.57143e+06
8	3	No antibiotic	9	6	1.28571e+06	1285714286
8	3	Maintreatment only	10	3	1428.57	1.42857e+06
8	3	Pretreatment only	18	6	2.57143e+06	2571428571
8	3	No antibiotic	12	6	1.71429e+06	1714285714
8	3	No antibiotic			0	0
8	3	Pretreatment only			0	0
8	3	Antibiotic switch	10	3	1428.57	1.42857e+06
8	3	Maintreatment only	10	3	1428.57	1.42857e+06

## Sheet: CAR-CEF Hys
Timepoint	Replicate	Treatment	Count	Dilution	Cfu.ul	Cfu.ml
-0.25	1	Post secondary growth	31	3	4428.57	4.64286e+06
-0.25	1	Post secondary growth	34	3	4857.14	4500000
-0.25	1	Post secondary growth	21	3	3000	3500000
-0.25	1	Post secondary growth	28	3	4000	3.92857e+06
-0.25	2	Post secondary growth	25	3	3571.43	3.14286e+06
-0.25	2	Post secondary growth	23	3	3285.71	3.35714e+06
-0.25	2	Post secondary growth	22	3	3142.86	3.14286e+06
-0.25	2	Post secondary growth	24	3	3428.57	3.21429e+06
-0.25	3	Post secondary growth	21	3	3000	2500000
-0.25	3	Post secondary growth	27	3	3857.14	3000000
-0.25	3	Post secondary growth	22	3	3142.86	2.92857e+06
-0.25	3	Post secondary growth	6	4	8571.43	5.71429e+06
0	1	Antibiotic switch	26	3	3714.29	3.85714e+06
0	1	Antibiotic switch	22	3	3142.86	3.57143e+06
0	1	No antibiotic	26	3	3714.29	4.21429e+06
0	1	Pretreatment only	19	3	2714.29	2.92857e+06
0	1	Maintreatment only	21	3	3000	3.42857e+06
0	1	Antibiotic switch	17	3	2428.57	2500000
0	1	Pretreatment only	16	3	2285.71	2.85714e+06
0	1	Maintreatment only	31	3	4428.57	4.07143e+06
0	1	No antibiotic	37	3	5285.71	4.71429e+06
0	1	Maintreatment only	33	3	4714.29	4500000
0	1	Pretreatment only	18	3	2571.43	2.57143e+06
0	1	No antibiotic	24	3	3428.57	3.35714e+06
0	1	No antibiotic	34	3	4857.14	4.35714e+06
0	1	Pretreatment only	19	3	2714.29	2.35714e+06
0	1	Antibiotic switch	18	3	2571.43	2.57143e+06
0	1	Maintreatment only	28	3	4000	3.78571e+06
0	2	Antibiotic switch	20	3	2857.14	3.21429e+06
0	2	Antibiotic switch	24	3	3428.57	2.78571e+06
0	2	No antibiotic	5	4	7142.86	5.14286e+06
0	2	Pretreatment only	20	3	2857.14	2.92857e+06
0	2	Maintreatment only	34	3	4857.14	4.64286e+06
0	2	Antibiotic switch	18	3	2571.43	2.28571e+06
0	2	Pretreatment only	19	3	2714.29	2.92857e+06
0	2	Maintreatment only	38	3	5428.57	9.14286e+06
0	2	No antibiotic	28	3	4000	3.78571e+06
0	2	Maintreatment only	37	3	5285.71	4.78571e+06
0	2	Pretreatment only	12	3	1714.29	1.92857e+06
0	2	No antibiotic	4	4	5714.29	5000000
0	2	No antibiotic	30	3	4285.71	4000000
0	2	Pretreatment only	21	3	3000	3.07143e+06
0	2	Antibiotic switch	17	3	2428.57	2.64286e+06
0	2	Maintreatment only	35	3	5000	8.92857e+06
0	3	Antibiotic switch	17	3	2428.57	3.21429e+06
0	3	Antibiotic switch	15	3	2142.86	3000000
0	3	No antibiotic	27	3	3857.14	3.28571e+06
0	3	Pretreatment only	9	3	1285.71	2.71429e+06
0	3	Maintreatment only	14	3	2000	2500000
0	3	Antibiotic switch	16	3	2285.71	3.64286e+06
0	3	Pretreatment only	22	3	3142.86	3.07143e+06
0	3	Maintreatment only	17	3	2428.57	4000000
0	3	No antibiotic	26	3	3714.29	3.28571e+06
0	3	Maintreatment only	13	3	1857.14	2.14286e+06
0	3	Pretreatment only	20	3	2857.14	2500000
0	3	No antibiotic	30	3	4285.71	7.85714e+06
0	3	No antibiotic	20	3	2857.14	3.42857e+06
0	3	Pretreatment only	17	3	2428.57	2.57143e+06
0	3	Antibiotic switch	15	3	2142.86	2.14286e+06
0	3	Maintreatment only	32	3	4571.43	4500000
4	1	Antibiotic switch	23	3	3285.71	3.71429e+06
4	1	Antibiotic switch	22	3	3142.86	3.35714e+06
4	1	No antibiotic	12	5	171429	2.21429e+08
4	1	Pretreatment only	9	5	128571	1.92857e+08
4	1	Maintreatment only	37	3	5285.71	5.14286e+06
4	1	Antibiotic switch	20	3	2857.14	3.07143e+06
4	1	Pretreatment only	36	5	514286	3.92857e+08
4	1	Maintreatment only	13	4	18571.4	1.92857e+07
4	1	No antibiotic	26	5	371429	3.64286e+08
4	1	Maintreatment only	12	4	17142.9	15000000
4	1	Pretreatment only	25	5	357143	3.57143e+08
4	1	No antibiotic	27	5	385714	3.57143e+08
4	1	No antibiotic	29	5	414286	3.71429e+08
4	1	Pretreatment only	22	5	314286	2.85714e+08
4	1	Antibiotic switch	33	3	4714.29	4.64286e+06
4	1	Maintreatment only	8	4	11428.6	1.57143e+07
4	2	Antibiotic switch	29	3	4142.86	3.71429e+06
4	2	Antibiotic switch	26	3	3714.29	3.92857e+06
4	2	No antibiotic			0	0
4	2	Pretreatment only			0	0
4	2	Maintreatment only			0	0
4	2	Antibiotic switch	33	3	4714.29	4.21429e+06
4	2	Pretreatment only			0	0
4	2	Maintreatment only			0	0
4	2	No antibiotic			0	0
4	2	Maintreatment only			0	0
4	2	Pretreatment only			0	0
4	2	No antibiotic			0	0
4	2	No antibiotic	25	5	357143	350000000
4	2	Pretreatment only	23	5	328571	350000000
4	2	Antibiotic switch	18	3	2571.43	2.64286e+06
4	2	Maintreatment only	7	4	10000	7.14286e+06
4	3	Antibiotic switch	4	3	571.429	542857
4	3	Antibiotic switch	11	3	1571.43	1.28571e+06
4	3	No antibiotic	24	5	342857	3.21429e+08
4	3	Pretreatment only	26	5	371429	3.78571e+08
4	3	Maintreatment only	9	4	12857.1	1.28571e+07
4	3	Antibiotic switch	10	3	1428.57	1500000
4	3	Pretreatment only	21	5	300000	2.71429e+08
4	3	Maintreatment only	5	4	7142.86	6.35714e+06
4	3	No antibiotic	17	5	242857	2.78571e+08
4	3	Maintreatment only	28	3	4000	7000000
4	3	Pretreatment only	26	5	371429	3.85714e+08
4	3	No antibiotic	18	5	257143	3.14286e+08
4	3	No antibiotic	15	6	2.14286e+06	1214285714
4	3	Pretreatment only	22	5	314286	350000000
4	3	Antibiotic switch	9	3	1285.71	785714
4	3	Maintreatment only	6	4	8571.43	9.28571e+06
8	1	Antibiotic switch	21	3	3000	2.64286e+06
8	1	Antibiotic switch	4	3	571.429	1.14286e+06
8	1	No antibiotic	22	6	3.14286e+06	2714285714
8	1	Pretreatment only	15	6	2.14286e+06	2428571429
8	1	Maintreatment only	34	3	4857.14	4.42857e+06
8	1	Antibiotic switch	24	3	3428.57	3.35714e+06
8	1	Pretreatment only	17	6	2.42857e+06	2142857143
8	1	Maintreatment only	30	3	4285.71	4.14286e+06
8	1	No antibiotic	11	6	1.57143e+06	2000000000
8	1	Maintreatment only	30	3	4285.71	4.14286e+06
8	1	Pretreatment only	15	6	2.14286e+06	2071428571
8	1	No antibiotic	16	6	2.28571e+06	1928571429
8	1	No antibiotic	13	6	1.85714e+06	1571428571
8	1	Pretreatment only	17	6	2.42857e+06	2571428571
8	1	Antibiotic switch	8	3	1142.86	1500000
8	1	Maintreatment only	22	3	3142.86	3.14286e+06
8	2	Antibiotic switch	30	2	428.571	471429
8	2	Antibiotic switch	27	2	385.714	442857
8	2	No antibiotic	15	6	2.14286e+06	1785714286
8	2	Pretreatment only	15	6	2.14286e+06	2071428571
8	2	Maintreatment only	25	3	3571.43	3.71429e+06
8	2	Antibiotic switch	26	2	371.429	400000
8	2	Pretreatment only	12	6	1.71429e+06	1785714286
8	2	Maintreatment only	24	3	3428.57	3.92857e+06
8	2	No antibiotic	16	6	2.28571e+06	2285714286
8	2	Maintreatment only	28	3	4000	4000000
8	2	Pretreatment only	16	6	2.28571e+06	2285714286
8	2	No antibiotic	16	6	2.28571e+06	2000000000
8	2	No antibiotic	18	6	2.57143e+06	2428571429
8	2	Pretreatment only	12	6	1.71429e+06	1785714286
8	2	Antibiotic switch	24	2	342.857	350000
8	2	Maintreatment only	20	3	2857.14	4.28571e+06
8	3	Antibiotic switch	9	2	128.571	121429
8	3	Antibiotic switch	9	2	128.571	100000
8	3	No antibiotic	18	6	2.57143e+06	2000000000
8	3	Pretreatment only	14	6	2000000	2071428571
8	3	Maintreatment only	19	3	2714.29	2.64286e+06
8	3	Antibiotic switch	5	2	71.4286	85714.3
8	3	Pretreatment only	20	6	2.85714e+06	2642857143
8	3	Maintreatment only	23	3	3285.71	2.85714e+06
8	3	No antibiotic	18	6	2.57143e+06	2000000000
8	3	Maintreatment only	18	3	2571.43	2.28571e+06
8	3	Pretreatment only	21	6	3000000	2642857143
8	3	No antibiotic	10	6	1.42857e+06	1571428571
8	3	No antibiotic	21	6	3000000	2428571429
8	3	Pretreatment only	14	6	2000000	2428571429
8	3	Antibiotic switch	11	2	157.143	171429
8	3	Maintreatment only	21	3	3000	2.64286e+06

## Sheet: CEF-CAR Hys
Timepoint	Replicate	Treatment	Count	Dilution	Cfu.ul	Cfu.ml
-0.25	1	Post secondary growth	27	3	3857.14	4000000
-0.25	1	Post secondary growth	26	3	3714.29	4.21429e+06
-0.25	1	Post secondary growth	26	3	3714.29	4.07143e+06
-0.25	1	Post secondary growth	26	3	3714.29	3.28571e+06
-0.25	2	Post secondary growth	35	3	5000	4500000
-0.25	2	Post secondary growth	39	3	5571.43	4.78571e+06
-0.25	2	Post secondary growth	28	3	4000	4.28571e+06
-0.25	2	Post secondary growth	30	3	4285.71	3.85714e+06
-0.25	3	Post secondary growth	27	3	3857.14	3.92857e+06
-0.25	3	Post secondary growth	32	3	4571.43	4.64286e+06
-0.25	3	Post secondary growth	24	3	3428.57	3.92857e+06
-0.25	3	Post secondary growth	17	3	2428.57	3000000
0	1	Antibiotic switch	34	2	485.714	435714
0	1	Antibiotic switch	30	2	428.571	342857
0	1	No antibiotic	17	3	2428.57	1.49286e+06
0	1	Pretreatment only	35	2	500	507143
0	1	Maintreatment only	36	3	5142.86	5.07143e+06
0	1	Antibiotic switch	26	3	3714.29	3.64286e+06
0	1	Pretreatment only	28	3	4000	3500000
0	1	Maintreatment only	30	3	4285.71	4000000
0	1	No antibiotic	24	3	3428.57	2500000
0	1	Maintreatment only	26	3	3714.29	2.57143e+06
0	1	Pretreatment only	20	3	2857.14	2.21429e+06
0	1	No antibiotic	28	3	4000	3.57143e+06
0	1	No antibiotic	24	3	3428.57	3.57143e+06
0	1	Pretreatment only	25	3	3571.43	3.28571e+06
0	1	Antibiotic switch	15	3	2142.86	2.28571e+06
0	1	Maintreatment only	19	3	2714.29	3.57143e+06
0	2	Antibiotic switch	11	2	157.143	1.57857e+06
0	2	Antibiotic switch	13	2	185.714	1.37857e+06
0	2	No antibiotic	36	2	514.286	1.82857e+06
0	2	Pretreatment only	28	2	400	2200000
0	2	Maintreatment only	38	2	542.857	1700000
0	2	Antibiotic switch	26	2	371.429	1900000
0	2	Pretreatment only	32	2	457.143	2300000
0	2	Maintreatment only	17	3	2428.57	3.78571e+06
0	2	No antibiotic	16	3	2285.71	1.24286e+06
0	2	Maintreatment only	29	3	4142.86	2.31429e+06
0	2	Pretreatment only	28	3	4000	2.21429e+06
0	2	No antibiotic	16	3	2285.71	1.39286e+06
0	2	No antibiotic
0	2	Pretreatment only
0	2	Antibiotic switch
0	2	Maintreatment only
0	3	Antibiotic switch	22	3	3142.86	2.71429e+06
0	3	Antibiotic switch	25	3	3571.43	3.07143e+06
0	3	No antibiotic	28	3	4000	3.07143e+06
0	3	Pretreatment only	25	3	3571.43	3.35714e+06
0	3	Maintreatment only	10	3	1428.57	2.85714e+06
0	3	Antibiotic switch	6	3	857.143	2.28571e+06
0	3	Pretreatment only	5	3	714.286	1.64286e+06
0	3	Maintreatment only	8	3	1142.86	3.28571e+06
0	3	No antibiotic	22	3	3142.86	1700000
0	3	Maintreatment only	18	3	2571.43	1400000
0	3	Pretreatment only	19	3	2714.29	1.47143e+06
0	3	No antibiotic	17	3	2428.57	1.37143e+06
0	3	No antibiotic	8	3	1142.86	2.64286e+06
0	3	Pretreatment only	17	3	2428.57	2.71429e+06
0	3	Antibiotic switch	21	3	3000	3.07143e+06
0	3	Maintreatment only	22	3	3142.86	3.35714e+06
4	1	Antibiotic switch	21	4	30000	3.21429e+07
4	1	Antibiotic switch	25	4	35714.3	3.42857e+07
4	1	No antibiotic	22	5	314286	2.57143e+08
4	1	Pretreatment only	27	5	385714	350000000
4	1	Maintreatment only	27	4	38571.4	4.21429e+07
4	1	Antibiotic switch	20	4	28571.4	3.07143e+07
4	1	Pretreatment only	13	5	185714	2.78571e+08
4	1	Maintreatment only	3	5	42857.1	2.28571e+08
4	1	No antibiotic	19	5	271429	2.92857e+08
4	1	Maintreatment only	25	4	35714.3	3.85714e+07
4	1	Pretreatment only	21	5	300000	3.28571e+08
4	1	No antibiotic	23	5	328571	2.85714e+08
4	1	No antibiotic	26	5	371429	3.28571e+08
4	1	Pretreatment only	26	5	371429	2.85714e+08
4	1	Antibiotic switch	16	4	22857.1	2.57143e+07
4	1	Maintreatment only	23	4	32857.1	8.78571e+07
4	2	Antibiotic switch	24	4	34285.7	3.35714e+07
4	2	Antibiotic switch	23	4	32857.1	3.14286e+07
4	2	No antibiotic	14	5	200000	2.28571e+08
4	2	Pretreatment only	22	5	314286	3.71429e+08
4	2	Maintreatment only	32	4	45714.3	1.01429e+08
4	2	Antibiotic switch	23	4	32857.1	30000000
4	2	Pretreatment only	26	5	371429	3.92857e+08
4	2	Maintreatment only	29	5	414286	2.35714e+08
4	2	No antibiotic	22	5	314286	300000000
4	2	Maintreatment only	29	4	41428.6	7.78571e+07
4	2	Pretreatment only	25	5	357143	350000000
4	2	No antibiotic	17	5	242857	2.71429e+08
4	2	No antibiotic	30	5	428571	3.57143e+08
4	2	Pretreatment only	14	5	200000	2.71429e+08
4	2	Antibiotic switch	20	4	28571.4	1514285714
4	2	Maintreatment only	10	5	142857	150000000
4	3	Antibiotic switch	27	4	38571.4	4.07143e+07
4	3	Antibiotic switch	26	4	37142.9	3.35714e+07
4	3	No antibiotic	32	5	457143	4.57143e+08
4	3	Pretreatment only	25	5	357143	4.35714e+08
4	3	Maintreatment only	30	4	42857.1	4.92857e+07
4	3	Antibiotic switch	20	4	28571.4	30000000
4	3	Pretreatment only	28	5	400000	4.07143e+08
4	3	Maintreatment only	26	4	37142.9	3.85714e+07
4	3	No antibiotic	30	5	428571	4.21429e+08
4	3	Maintreatment only	22	4	31428.6	3.28571e+07
4	3	Pretreatment only	20	5	285714	2.85714e+08
4	3	No antibiotic	28	5	400000	3.92857e+08
4	3	No antibiotic	34	5	485714	4.92857e+08
4	3	Pretreatment only	26	5	371429	4.21429e+08
4	3	Antibiotic switch	22	4	31428.6	3.35714e+07
4	3	Maintreatment only	10	5	142857	9.64286e+07
8	1	Antibiotic switch	10	4	14285.7	1.35714e+07
8	1	Antibiotic switch	17	4	24285.7	1.42857e+07
8	1	No antibiotic	6	6	857143	6.85714e+08
8	1	Pretreatment only	13	6	1.85714e+06	1271428571
8	1	Maintreatment only	21	4	30000	30000000
8	1	Antibiotic switch	11	4	15714.3	1.42857e+07
8	1	Pretreatment only	15	6	2.14286e+06	1371428572
8	1	Maintreatment only	15	4	21428.6	25000000
8	1	No antibiotic	11	6	1.57143e+06	1100000000
8	1	Maintreatment only	19	4	27142.9	2.92857e+07
8	1	Pretreatment only	15	6	2.14286e+06	1357142857
8	1	No antibiotic	14	6	2000000	1271428571
8	1	No antibiotic	13	6	1.85714e+06	1571428572
8	1	Pretreatment only	17	6	2.42857e+06	2142857143
8	1	Antibiotic switch	10	4	14285.7	1.35714e+07
8	1	Maintreatment only	19	4	27142.9	2.35714e+07
8	2	Antibiotic switch	10	4	14285.7	1.57143e+07
8	2	Antibiotic switch	11	4	15714.3	15000000
8	2	No antibiotic	34	5	485714	5.14286e+08
8	2	Pretreatment only	31	5	442857	450000000
8	2	Maintreatment only	26	4	37142.9	35000000
8	2	Antibiotic switch	7	4	10000	1.28571e+07
8	2	Pretreatment only	42	5	600000	6.14286e+08
8	2	Maintreatment only	13	5	185714	110000000
8	2	No antibiotic	16	5	228571	3.71429e+08
8	2	Maintreatment only	20	4	28571.4	3.28571e+07
8	2	Pretreatment only	36	5	514286	4.64286e+08
8	2	No antibiotic	24	5	342857	885714286
8	2	No antibiotic	17	6	2.42857e+06	2642857143
8	2	Pretreatment only	13	6	1.85714e+06	2142857143
8	2	Antibiotic switch	15	4	21428.6	2.21429e+07
8	2	Maintreatment only	22	4	31428.6	3.85714e+07
8	3	Antibiotic switch	18	4	25714.3	2.57143e+07
8	3	Antibiotic switch	14	4	20000	2.07143e+07
8	3	No antibiotic	20	6	2.85714e+06	3142857143
8	3	Pretreatment only	19	6	2.71429e+06	2857142857
8	3	Maintreatment only	26	4	37142.9	3.57143e+07
8	3	Antibiotic switch	16	4	22857.1	2.57143e+07
8	3	Pretreatment only	15	6	2.14286e+06	1785714286
8	3	Maintreatment only	29	4	41428.6	40000000
8	3	No antibiotic	17	6	2.42857e+06	2071428572
8	3	Maintreatment only	23	4	32857.1	35000000
8	3	Pretreatment only	32	5	457143	8e+08
8	3	No antibiotic	38	5	542857	5.07143e+08
8	3	No antibiotic	20	6	2.85714e+06	2500000000
8	3	Pretreatment only	17	6	2.42857e+06	3071428572
8	3	Antibiotic switch	14	4	20000	25000000
8	3	Maintreatment only	25	4	35714.3	3.28571e+07

## Sheet: CEF-CEF Hys
Timepoint	Replicate	Treatment	Count	Dilution	Cfu.ul	Cfu.ml
-0.25	1	Post secondary growth	37	3	5285.71	5.28571e+06
-0.25	1	Post secondary growth	39	3	5571.43	5.57143e+06
-0.25	1	Post secondary growth	45	3	6428.57	6.42857e+06
-0.25	1	Post secondary growth	30	3	4285.71	4.28571e+06
-0.25	2	Post secondary growth	31	3	4428.57	4.42857e+06
-0.25	2	Post secondary growth	32	3	4571.43	4.57143e+06
-0.25	2	Post secondary growth	37	3	5285.71	5.28571e+06
-0.25	2	Post secondary growth	28	3	4000	4000000
-0.25	3	Post secondary growth	37	3	5285.71	5.28571e+06
-0.25	3	Post secondary growth	27	3	3857.14	3.85714e+06
-0.25	3	Post secondary growth	30	3	4285.71	4.28571e+06
-0.25	3	Post secondary growth	41	3	5857.14	5.85714e+06
0	1	Antibiotic switch	19	3	2714.29	2.71429e+06
0	1	Antibiotic switch	15	3	2142.86	2.14286e+06
0	1	No antibiotic	22	3	3142.86	3.14286e+06
0	1	Pretreatment only	18	3	2571.43	2.57143e+06
0	1	Maintreatment only	25	3	3571.43	3.57143e+06
0	1	Antibiotic switch	19	3	2714.29	2.71429e+06
0	1	Pretreatment only	24	3	3428.57	3.42857e+06
0	1	Maintreatment only	29	3	4142.86	4.14286e+06
0	1	No antibiotic	26	3	3714.29	3.71429e+06
0	1	Maintreatment only	20	3	2857.14	2.85714e+06
0	1	Pretreatment only	23	3	3285.71	3.28571e+06
0	1	No antibiotic	25	3	3571.43	3.57143e+06
0	1	No antibiotic	33	3	4714.29	4.71429e+06
0	1	Pretreatment only	17	3	2428.57	2.42857e+06
0	1	Antibiotic switch	19	3	2714.29	2.71429e+06
0	1	Maintreatment only	31	3	4428.57	4.42857e+06
0	2	Antibiotic switch	14	3	2000	2000000
0	2	Antibiotic switch	19	3	2714.29	2.71429e+06
0	2	No antibiotic	29	3	4142.86	4.14286e+06
0	2	Pretreatment only	22	3	3142.86	3.14286e+06
0	2	Maintreatment only	24	3	3428.57	3.42857e+06
0	2	Antibiotic switch	21	3	3000	3000000
0	2	Pretreatment only	21	3	3000	3000000
0	2	Maintreatment only	38	3	5428.57	5.42857e+06
0	2	No antibiotic	32	3	4571.43	4.57143e+06
0	2	Maintreatment only	30	3	4285.71	4.28571e+06
0	2	Pretreatment only	23	3	3285.71	3.28571e+06
0	2	No antibiotic	30	3	4285.71	4.28571e+06
0	2	No antibiotic	31	3	4428.57	4.42857e+06
0	2	Pretreatment only	20	3	2857.14	2.85714e+06
0	2	Antibiotic switch	16	3	2285.71	2.28571e+06
0	2	Maintreatment only	27	3	3857.14	3.85714e+06
0	3	Antibiotic switch	23	3	3285.71	3.28571e+06
0	3	Antibiotic switch	20	3	2857.14	2.85714e+06
0	3	No antibiotic	36	3	5142.86	5.14286e+06
0	3	Pretreatment only	15	3	2142.86	2.14286e+06
0	3	Maintreatment only	30	3	4285.71	4.28571e+06
0	3	Antibiotic switch	22	3	3142.86	3.14286e+06
0	3	Pretreatment only	9	3	1285.71	1.28571e+06
0	3	Maintreatment only	31	3	4428.57	4.42857e+06
0	3	No antibiotic	31	3	4428.57	4.42857e+06
0	3	Maintreatment only		3	0	0
0	3	Pretreatment only		3	0	0
0	3	No antibiotic	25	3	3571.43	3.57143e+06
0	3	No antibiotic	22	3	3142.86	3.14286e+06
0	3	Pretreatment only	12	3	1714.29	1.71429e+06
0	3	Antibiotic switch	25	3	3571.43	3.57143e+06
0	3	Maintreatment only	30	3	4285.71	4.28571e+06
4	1	Antibiotic switch	10	3	1428.57	1.42857e+06
4	1	Antibiotic switch	7	3	1000	1000000
4	1	No antibiotic	27	5	385714	3.85714e+08
4	1	Pretreatment only	39	5	557143	5.57143e+08
4	1	Maintreatment only	27	3	3857.14	3.85714e+06
4	1	Antibiotic switch	9	3	1285.71	1.28571e+06
4	1	Pretreatment only	6	6	857143	8.57143e+08
4	1	Maintreatment only	28	3	4000	4000000
4	1	No antibiotic	5	6	714286	7.14286e+08
4	1	Maintreatment only	23	3	3285.71	3.28571e+06
4	1	Pretreatment only	30	5	428571	4.28571e+08
4	1	No antibiotic	8	6	1.14286e+06	1142857143
4	1	No antibiotic	43	5	614286	6.14286e+08
4	1	Pretreatment only	8	6	1.14286e+06	1142857143
4	1	Antibiotic switch	6	3	857.143	857143
4	1	Maintreatment only	31	3	4428.57	4.42857e+06
4	2	Antibiotic switch	16	3	2285.71	2.28571e+06
4	2	Antibiotic switch	10	3	1428.57	1.42857e+06
4	2	No antibiotic	39	5	557143	5.57143e+08
4	2	Pretreatment only	36	5	514286	5.14286e+08
4	2	Maintreatment only	49	3	7000	7000000
4	2	Antibiotic switch	12	3	1714.29	1.71429e+06
4	2	Pretreatment only	36	5	514286	5.14286e+08
4	2	Maintreatment only	35	3	5000	5000000
4	2	No antibiotic	39	5	557143	5.57143e+08
4	2	Maintreatment only	31	3	4428.57	4.42857e+06
4	2	Pretreatment only	23	5	328571	3.28571e+08
4	2	No antibiotic	34	5	485714	4.85714e+08
4	2	No antibiotic	4	6	571429	5.71429e+08
4	2	Pretreatment only	30	5	428571	4.28571e+08
4	2	Antibiotic switch	13	3	1857.14	1.85714e+06
4	2	Maintreatment only	37	3	5285.71	5.28571e+06
4	3	Antibiotic switch	26	3	3714.29	3.71429e+06
4	3	Antibiotic switch	20	3	2857.14	2.85714e+06
4	3	No antibiotic	20	5	285714	2.85714e+08
4	3	Pretreatment only	31	5	442857	4.42857e+08
4	3	Maintreatment only	46	3	6571.43	6.57143e+06
4	3	Antibiotic switch	30	3	4285.71	4.28571e+06
4	3	Pretreatment only	28	5	400000	400000000
4	3	Maintreatment only	27	3	3857.14	3.85714e+06
4	3	No antibiotic	24	5	342857	3.42857e+08
4	3	Maintreatment only	33	3	4714.29	4.71429e+06
4	3	Pretreatment only	30	5	428571	4.28571e+08
4	3	No antibiotic	5	6	714286	7.14286e+08
4	3	No antibiotic	38	5	542857	5.42857e+08
4	3	Pretreatment only	13	6	1.85714e+06	1857142857
4	3	Antibiotic switch	16	3	2285.71	2.28571e+06
4	3	Maintreatment only	36	3	5142.86	5.14286e+06
8	1	Antibiotic switch	14	2	200	200000
8	1	Antibiotic switch	26	2	371.429	371429
8	1	No antibiotic	9	6	1.28571e+06	1285714286
8	1	Pretreatment only	8	6	1.14286e+06	1142857143
8	1	Maintreatment only	20	3	2857.14	2.85714e+06
8	1	Antibiotic switch	21	2	300	300000
8	1	Pretreatment only	19	6	2.71429e+06	2714285714
8	1	Maintreatment only	10	3	1428.57	1.42857e+06
8	1	No antibiotic	15	6	2.14286e+06	2142857143
8	1	Maintreatment only	11	3	1571.43	1.57143e+06
8	1	Pretreatment only	14	6	2000000	2000000000
8	1	No antibiotic	17	6	2.42857e+06	2428571429
8	1	No antibiotic	13	6	1.85714e+06	1857142857
8	1	Pretreatment only	8	6	1.14286e+06	1142857143
8	1	Antibiotic switch	26	2	371.429	371429
8	1	Maintreatment only	6	3	857.143	857143
8	2	Antibiotic switch	14	2	200	200000
8	2	Antibiotic switch	9	2	128.571	128571
8	2	No antibiotic	6	6	857143	8.57143e+08
8	2	Pretreatment only	72	5	1.02857e+06	1028571429
8	2	Maintreatment only	20	3	2857.14	2.85714e+06
8	2	Antibiotic switch	12	2	171.429	171429
8	2	Pretreatment only	7	6	1000000	1000000000
8	2	Maintreatment only	8	3	1142.86	1.14286e+06
8	2	No antibiotic	10	6	1.42857e+06	1428571429
8	2	Maintreatment only	15	3	2142.86	2.14286e+06
8	2	Pretreatment only	6	6	857143	8.57143e+08
8	2	No antibiotic	12	6	1.71429e+06	1714285714
8	2	No antibiotic	16	6	2.28571e+06	2285714286
8	2	Pretreatment only	21	6	3000000	3000000000
8	2	Antibiotic switch	13	2	185.714	185714
8	2	Maintreatment only	17	3	2428.57	2.42857e+06
8	3	Antibiotic switch	18	2	257.143	257143
8	3	Antibiotic switch	17	2	242.857	242857
8	3	No antibiotic	10	6	1.42857e+06	1428571429
8	3	Pretreatment only	10	6	1.42857e+06	1428571429
8	3	Maintreatment only	37	2	528.571	528571
8	3	Antibiotic switch	18	2	257.143	257143
8	3	Pretreatment only	30	5	428571	4.28571e+08
8	3	Maintreatment only	45	2	642.857	642857
8	3	No antibiotic	9	6	1.28571e+06	1285714286
8	3	Maintreatment only	39	2	557.143	557143
8	3	Pretreatment only	35	5	500000	500000000
8	3	No antibiotic	12	6	1.71429e+06	1714285714
8	3	No antibiotic	18	6	2.57143e+06	2571428571
8	3	Pretreatment only	9	6	1.28571e+06	1285714286
8	3	Antibiotic switch	22	2	314.286	314286
8	3	Maintreatment only	7	3	1000	1000000

## Sheet: CEF-DOR Hys
Timepoint	Replicate	Treatment	Count	Dilution	Cfu.ul	Cfu.ml
-0.25	1	Post secondary growth	37	3	5285.71	5.14286e+06
-0.25	1	Post secondary growth	23	3	3285.71	3.64286e+06
-0.25	1	Post secondary growth	32	3	4571.43	4.42857e+06
-0.25	1	Post secondary growth	30	3	4285.71	4.07143e+06
-0.25	2	Post secondary growth	29	3	4142.86	4.42857e+06
-0.25	2	Post secondary growth	30	3	4285.71	5000000
-0.25	2	Post secondary growth	34	3	4857.14	4.57143e+06
-0.25	2	Post secondary growth	31	3	4428.57	4.92857e+06
-0.25	3	Post secondary growth	20	3	2857.14	3.21429e+06
-0.25	3	Post secondary growth	33	3	4714.29	4500000
-0.25	3	Post secondary growth	20	3	2857.14	3.28571e+06
-0.25	3	Post secondary growth	26	3	3714.29	3.71429e+06
0	1	Antibiotic switch	42	3	6000	5000000
0	1	Antibiotic switch	36	3	5142.86	5.42857e+06
0	1	No antibiotic	43	3	6142.86	1.09286e+07
0	1	Pretreatment only	44	3	6285.71	5.28571e+06
0	1	Maintreatment only	16	4	22857.1	2.28571e+07
0	1	Antibiotic switch	26	3	3714.29	4.14286e+06
0	1	Pretreatment only	5	4	7142.86	4.78571e+06
0	1	Maintreatment only	36	3	5142.86	5.07143e+06
0	1	No antibiotic	30	3	4285.71	5000000
0	1	Maintreatment only	31	3	4428.57	3.92857e+06
0	1	Pretreatment only	30	3	4285.71	4.28571e+06
0	1	No antibiotic	30	3	4285.71	4.21429e+06
0	1	No antibiotic	28	3	4000	4.35714e+06
0	1	Pretreatment only	26	3	3714.29	4.28571e+06
0	1	Antibiotic switch	23	3	3285.71	3.14286e+06
0	1	Maintreatment only	35	3	5000	5000000
0	2	Antibiotic switch	26	3	3714.29	4.07143e+06
0	2	Antibiotic switch	35	3	5000	4.71429e+06
0	2	No antibiotic	37	3	5285.71	5500000
0	2	Pretreatment only	27	3	3857.14	3.57143e+06
0	2	Maintreatment only	4	4	5714.29	5.78571e+06
0	2	Antibiotic switch	21	3	3000	3.42857e+06
0	2	Pretreatment only	29	3	4142.86	4.21429e+06
0	2	Maintreatment only	8	4	11428.6	10000000
0	2	No antibiotic	36	3	5142.86	5.07143e+06
0	2	Maintreatment only	33	3	4714.29	4.71429e+06
0	2	Pretreatment only	28	3	4000	4000000
0	2	No antibiotic	3	4	4285.71	4.85714e+06
0	2	No antibiotic	9	4	12857.1	10000000
0	2	Pretreatment only
0	2	Antibiotic switch	30	3	4285.71	4.21429e+06
0	2	Maintreatment only	31	3	4428.57	4.35714e+06
0	3	Antibiotic switch	41	3	5857.14	5.85714e+06
0	3	Antibiotic switch	8	3	1142.86	1.35714e+06
0	3	No antibiotic	23	3	3285.71	2.42857e+06
0	3	Pretreatment only	18	3	2571.43	2.85714e+06
0	3	Maintreatment only	11	4	15714.3	8.85714e+06
0	3	Antibiotic switch	34	2	485.714	2.88571e+06
0	3	Pretreatment only
0	3	Maintreatment only	10	4	14285.7	1.42857e+07
0	3	No antibiotic	15	4	21428.6	2.07143e+07
0	3	Maintreatment only	9	4	12857.1	9500000
0	3	Pretreatment only	31	3	4428.57	3.78571e+06
0	3	No antibiotic	31	3	4428.57	4.42857e+06
0	3	No antibiotic	38	3	5428.57	5.92857e+06
0	3	Pretreatment only	20	3	2857.14	3.07143e+06
0	3	Antibiotic switch	21	3	3000	3.28571e+06
0	3	Maintreatment only	24	3	3428.57	3.71429e+06
4	1	Antibiotic switch	28	3	4000	4500000
4	1	Antibiotic switch	45	3	6428.57	5.35714e+06
4	1	No antibiotic	12	5	171429	1.64286e+08
4	1	Pretreatment only	20	5	285714	2.42857e+08
4	1	Maintreatment only	16	4	22857.1	2.14286e+07
4	1	Antibiotic switch	42	3	6000	5.71429e+06
4	1	Pretreatment only	15	5	214286	1.85714e+08
4	1	Maintreatment only	12	4	17142.9	15000000
4	1	No antibiotic	9	5	128571	1.64286e+08
4	1	Maintreatment only	13	4	18571.4	2.28571e+07
4	1	Pretreatment only	13	5	185714	2.07143e+08
4	1	No antibiotic	17	5	242857	200000000
4	1	No antibiotic	12	5	171429	2.28571e+08
4	1	Pretreatment only	6	5	85714.3	6.92857e+07
4	1	Antibiotic switch	36	3	5142.86	4.71429e+06
4	1	Maintreatment only	12	4	17142.9	1.78571e+07
4	2	Antibiotic switch	7	4	10000	1.14286e+07
4	2	Antibiotic switch	13	4	18571.4	1.64286e+07
4	2	No antibiotic	16	5	228571	2.21429e+08
4	2	Pretreatment only	19	5	271429	2.42857e+08
4	2	Maintreatment only	1	4	1428.57	2.14286e+06
4	2	Antibiotic switch	43	4	61428.6	3.36429e+07
4	2	Pretreatment only	14	5	200000	2.07143e+08
4	2	Maintreatment only	13	4	18571.4	1.78571e+07
4	2	No antibiotic	18	5	257143	2.14286e+08
4	2	Maintreatment only	16	4	22857.1	1.32857e+08
4	2	Pretreatment only	12	5	171429	150000000
4	2	No antibiotic	11	5	157143	1.78571e+08
4	2	No antibiotic	13	5	185714	1.24286e+08
4	2	Pretreatment only	13	5	185714	1.78571e+08
4	2	Antibiotic switch	7	4	10000	1.14286e+07
4	2	Maintreatment only	7	4	10000	15000000
4	3	Antibiotic switch	8	4	11428.6	1.28571e+07
4	3	Antibiotic switch
4	3	No antibiotic	16	5	228571	2.07143e+08
4	3	Pretreatment only	14	5	200000	2.42857e+08
4	3	Maintreatment only	12	4	17142.9	15000000
4	3	Antibiotic switch	31	3	4428.57	4.28571e+06
4	3	Pretreatment only	17	5	242857	2.21429e+08
4	3	Maintreatment only	10	4	14285.7	1.35714e+07
4	3	No antibiotic	17	5	242857	250000000
4	3	Maintreatment only	13	4	18571.4	1.42857e+07
4	3	Pretreatment only	22	5	314286	2.78571e+08
4	3	No antibiotic	14	5	200000	2.14286e+08
4	3	No antibiotic	22	4	31428.6	3.57143e+07
4	3	Pretreatment only	14	5	200000	200000000
4	3	Antibiotic switch	32	3	4571.43	2.37143e+07
4	3	Maintreatment only	11	4	15714.3	1.36429e+08
8	1	Antibiotic switch	28	4	40000	4.07143e+07
8	1	Antibiotic switch	29	4	41428.6	3.71429e+07
8	1	No antibiotic	10	6	1.42857e+06	1500000000
8	1	Pretreatment only	11	6	1.57143e+06	1428571429
8	1	Maintreatment only	19	5	271429	1.92857e+08
8	1	Antibiotic switch	22	4	31428.6	3.14286e+07
8	1	Pretreatment only	7	6	1000000	1428571429
8	1	Maintreatment only	14	5	200000	2.14286e+08
8	1	No antibiotic	7	6	1000000	750000000
8	1	Maintreatment only	22	5	314286	2.64286e+08
8	1	Pretreatment only	9	6	1.28571e+06	1714285714
8	1	No antibiotic	16	6	2.28571e+06	2142857143
8	1	No antibiotic	31	5	442857	2.48571e+08
8	1	Pretreatment only	9	6	1.28571e+06	6.44643e+08
8	1	Antibiotic switch	33	5	471429	2.37286e+08
8	1	Maintreatment only	10	5	142857	74000000
8	2	Antibiotic switch	35	4	50000	4.64286e+07
8	2	Antibiotic switch	30	4	42857.1	5.71429e+07
8	2	No antibiotic	33	5	471429	1092857143
8	2	Pretreatment only	42	5	600000	800000000
8	2	Maintreatment only	13	5	185714	1.78571e+08
8	2	Antibiotic switch	27	4	38571.4	3.92857e+07
8	2	Pretreatment only	11	6	1.57143e+06	1500000000
8	2	Maintreatment only	6	5	85714.3	1.35714e+08
8	2	No antibiotic	39	5	557143	9.21429e+08
8	2	Maintreatment only	37	4	52857.1	4.85714e+07
8	2	Pretreatment only	36	5	514286	4.78571e+08
8	2	No antibiotic	34	5	485714	4.21429e+08
8	2	No antibiotic	14	6	2000000	1264285714
8	2	Pretreatment only	9	6	1.28571e+06	1500000000
8	2	Antibiotic switch	20	4	28571.4	3.28571e+07
8	2	Maintreatment only	40	4	57142.9	1.14286e+08
8	3	Antibiotic switch	7	5	100000	7.35714e+07
8	3	Antibiotic switch	12	5	171429	1.71429e+08
8	3	No antibiotic	10	6	1.42857e+06	1642857143
8	3	Pretreatment only	9	6	1.28571e+06	850000000
8	3	Maintreatment only	13	6	1.85714e+06	9.58571e+08
8	3	Antibiotic switch	31	5	442857	2.39286e+08
8	3	Pretreatment only	30	5	428571	4.35714e+08
8	3	Maintreatment only	14	5	200000	2.07143e+08
8	3	No antibiotic	31	5	442857	4.57143e+08
8	3	Maintreatment only	20	5	285714	2.42857e+08
8	3	Pretreatment only	31	5	442857	4.42857e+08
8	3	No antibiotic	11	6	1.57143e+06	1014285714
8	3	No antibiotic	25	5	357143	3.21429e+08
8	3	Pretreatment only	6	6	857143	6.64286e+08
8	3	Antibiotic switch	8	5	114286	1.35714e+08
8	3	Maintreatment only	6	5	85714.3	1.64286e+08

## Sheet: DOR-CEF Hys
Timepoint	Replicate	Treatment	Count	Dilution	Cfu.ul	Cfu.ml
-0.25	1	Post secondary growth	32	3	4571.43	4.57143e+06
-0.25	1	Post secondary growth	24	3	3428.57	3.42857e+06
-0.25	1	Post secondary growth	24	3	3428.57	3.42857e+06
-0.25	1	Post secondary growth	19	3	2714.29	2.71429e+06
-0.25	2	Post secondary growth	15	3	2142.86	2.14286e+06
-0.25	2	Post secondary growth	19	3	2714.29	2.71429e+06
-0.25	2	Post secondary growth	14	3	2000	2000000
-0.25	2	Post secondary growth	21	3	3000	3000000
-0.25	3	Post secondary growth	24	3	3428.57	3.42857e+06
-0.25	3	Post secondary growth	27	3	3857.14	3.85714e+06
-0.25	3	Post secondary growth	34	3	4857.14	4.85714e+06
-0.25	3	Post secondary growth	19	3	2714.29	2.71429e+06
0	1	Antibiotic switch	20	3	2857.14	2.85714e+06
0	1	Antibiotic switch	20	3	2857.14	2.85714e+06
0	1	No antibiotic	35	3	5000	5000000
0	1	Pretreatment only	17	3	2428.57	2.42857e+06
0	1	Maintreatment only	31	3	4428.57	4.42857e+06
0	1	Antibiotic switch	20	3	2857.14	2.85714e+06
0	1	Pretreatment only	9	3	1285.71	1.28571e+06
0	1	Maintreatment only	30	3	4285.71	4.28571e+06
0	1	No antibiotic	26	3	3714.29	3.71429e+06
0	1	Maintreatment only	25	3	3571.43	3.57143e+06
0	1	Pretreatment only	21	3	3000	3000000
0	1	No antibiotic	43	3	6142.86	6.14286e+06
0	1	No antibiotic	45	3	6428.57	6.42857e+06
0	1	Pretreatment only	31	3	4428.57	4.42857e+06
0	1	Antibiotic switch	28	3	4000	4000000
0	1	Maintreatment only	25	3	3571.43	3.57143e+06
0	2	Antibiotic switch	16	3	2285.71	2.28571e+06
0	2	Antibiotic switch	17	3	2428.57	2.42857e+06
0	2	No antibiotic	38	3	5428.57	5.42857e+06
0	2	Pretreatment only	17	3	2428.57	2.42857e+06
0	2	Maintreatment only	24	3	3428.57	3.42857e+06
0	2	Antibiotic switch	19	3	2714.29	2.71429e+06
0	2	Pretreatment only	20	3	2857.14	2.85714e+06
0	2	Maintreatment only	27	3	3857.14	3.85714e+06
0	2	No antibiotic	29	3	4142.86	4.14286e+06
0	2	Maintreatment only	24	3	3428.57	3.42857e+06
0	2	Pretreatment only	25	3	3571.43	3.57143e+06
0	2	No antibiotic	43	3	6142.86	6.14286e+06
0	2	No antibiotic	36	3	5142.86	5.14286e+06
0	2	Pretreatment only	23	3	3285.71	3.28571e+06
0	2	Antibiotic switch	16	3	2285.71	2.28571e+06
0	2	Maintreatment only	21	3	3000	3000000
0	3	Antibiotic switch	15	3	2142.86	2.14286e+06
0	3	Antibiotic switch	21	3	3000	3000000
0	3	No antibiotic	27	3	3857.14	3.85714e+06
0	3	Pretreatment only	9	3	1285.71	1.28571e+06
0	3	Maintreatment only	24	3	3428.57	3.42857e+06
0	3	Antibiotic switch	14	3	2000	2000000
0	3	Pretreatment only	19	3	2714.29	2.71429e+06
0	3	Maintreatment only	30	3	4285.71	4.28571e+06
0	3	No antibiotic	32	3	4571.43	4.57143e+06
0	3	Maintreatment only	23	3	3285.71	3.28571e+06
0	3	Pretreatment only	28	3	4000	4000000
0	3	No antibiotic	25	3	3571.43	3.57143e+06
0	3	No antibiotic	21	3	3000	3000000
0	3	Pretreatment only	16	3	2285.71	2.28571e+06
0	3	Antibiotic switch	21	3	3000	3000000
0	3	Maintreatment only	29	3	4142.86	4.14286e+06
4	1	Antibiotic switch	10	3	1428.57	1.42857e+06
4	1	Antibiotic switch	6	3	857.143	857143
4	1	No antibiotic	35	5	500000	500000000
4	1	Pretreatment only	26	5	371429	3.71429e+08
4	1	Maintreatment only	18	3	2571.43	2.57143e+06
4	1	Antibiotic switch	13	3	1857.14	1.85714e+06
4	1	Pretreatment only	30	5	428571	4.28571e+08
4	1	Maintreatment only	20	3	2857.14	2.85714e+06
4	1	No antibiotic	28	5	400000	400000000
4	1	Maintreatment only	17	3	2428.57	2.42857e+06
4	1	Pretreatment only	22	5	314286	3.14286e+08
4	1	No antibiotic	35	5	500000	500000000
4	1	No antibiotic	44	5	628571	6.28571e+08
4	1	Pretreatment only	42	5	600000	600000000
4	1	Antibiotic switch	13	3	1857.14	1.85714e+06
4	1	Maintreatment only	16	3	2285.71	2.28571e+06
4	2	Antibiotic switch	11	3	1571.43	1.57143e+06
4	2	Antibiotic switch	63	2	900	900000
4	2	No antibiotic	37	5	528571	5.28571e+08
4	2	Pretreatment only	34	5	485714	4.85714e+08
4	2	Maintreatment only	18	3	2571.43	2.57143e+06
4	2	Antibiotic switch	7	3	1000	1000000
4	2	Pretreatment only	36	5	514286	5.14286e+08
4	2	Maintreatment only	17	3	2428.57	2.42857e+06
4	2	No antibiotic	39	5	557143	5.57143e+08
4	2	Maintreatment only	15	3	2142.86	2.14286e+06
4	2	Pretreatment only	37	5	528571	5.28571e+08
4	2	No antibiotic	43	5	614286	6.14286e+08
4	2	No antibiotic	49	5	700000	700000000
4	2	Pretreatment only	44	5	628571	6.28571e+08
4	2	Antibiotic switch	11	3	1571.43	1.57143e+06
4	2	Maintreatment only	15	3	2142.86	2.14286e+06
4	3	Antibiotic switch	33	3	4714.29	4.71429e+06
4	3	Antibiotic switch	41	3	5857.14	5.85714e+06
4	3	No antibiotic	37	5	528571	5.28571e+08
4	3	Pretreatment only	43	5	614286	6.14286e+08
4	3	Maintreatment only	38	3	5428.57	5.42857e+06
4	3	Antibiotic switch	29	3	4142.86	4.14286e+06
4	3	Pretreatment only	24	5	342857	3.42857e+08
4	3	Maintreatment only	6	4	8571.43	8.57143e+06
4	3	No antibiotic	40	5	571429	5.71429e+08
4	3	Maintreatment only	36	3	5142.86	5.14286e+06
4	3	Pretreatment only	31	5	442857	4.42857e+08
4	3	No antibiotic	41	5	585714	5.85714e+08
4	3	No antibiotic	40	5	571429	5.71429e+08
4	3	Pretreatment only	7	6	1000000	1000000000
4	3	Antibiotic switch	20	3	2857.14	2.85714e+06
4	3	Maintreatment only	40	3	5714.29	5.71429e+06
8	1	Antibiotic switch	11	2	157.143	157143
8	1	Antibiotic switch	13	2	185.714	185714
8	1	No antibiotic	11	6	1.57143e+06	1571428571
8	1	Pretreatment only	51	5	728571	7.28571e+08
8	1	Maintreatment only	7	3	1000	1000000
8	1	Antibiotic switch	11	2	157.143	157143
8	1	Pretreatment only	9	6	1.28571e+06	1285714286
8	1	Maintreatment only	27	2	385.714	385714
8	1	No antibiotic	14	6	2000000	2000000000
8	1	Maintreatment only	24	2	342.857	342857
8	1	Pretreatment only	6	6	857143	8.57143e+08
8	1	No antibiotic	12	6	1.71429e+06	1714285714
8	1	No antibiotic	20	6	2.85714e+06	2857142857
8	1	Pretreatment only	14	6	2000000	2000000000
8	1	Antibiotic switch	9	2	128.571	128571
8	1	Maintreatment only	24	2	342.857	342857
8	2	Antibiotic switch	13	2	185.714	185714
8	2	Antibiotic switch	9	2	128.571	128571
8	2	No antibiotic	12	6	1.71429e+06	1714285714
8	2	Pretreatment only	18	6	2.57143e+06	2571428571
8	2	Maintreatment only	23	2	328.571	328571
8	2	Antibiotic switch	24	2	342.857	342857
8	2	Pretreatment only	10	6	1.42857e+06	1428571429
8	2	Maintreatment only	24	2	342.857	342857
8	2	No antibiotic	16	6	2.28571e+06	2285714286
8	2	Maintreatment only	20	2	285.714	285714
8	2	Pretreatment only	22	6	3.14286e+06	3142857143
8	2	No antibiotic	13	6	1.85714e+06	1857142857
8	2	No antibiotic	16	6	2.28571e+06	2285714286
8	2	Pretreatment only	22	6	3.14286e+06	3142857143
8	2	Antibiotic switch	17	2	242.857	242857
8	2	Maintreatment only	18	2	257.143	257143
8	3	Antibiotic switch	19	3	2714.29	2.71429e+06
8	3	Antibiotic switch	9	3	1285.71	1.28571e+06
8	3	No antibiotic	6	6	857143	8.57143e+08
8	3	Pretreatment only	8	6	1.14286e+06	1142857143
8	3	Maintreatment only	23	3	3285.71	3.28571e+06
8	3	Antibiotic switch	13	3	1857.14	1.85714e+06
8	3	Pretreatment only	12	6	1.71429e+06	1714285714
8	3	Maintreatment only	17	3	2428.57	2.42857e+06
8	3	No antibiotic	8	6	1.14286e+06	1142857143
8	3	Maintreatment only	24	3	3428.57	3.42857e+06
8	3	Pretreatment only	14	6	2000000	2000000000
8	3	No antibiotic	18	6	2.57143e+06	2571428571
8	3	No antibiotic	8	6	1.14286e+06	1142857143
8	3	Pretreatment only	14	6	2000000	2000000000
8	3	Antibiotic switch	15	3	2142.86	2.14286e+06
8	3	Maintreatment only	28	3	4000	4000000

## Sheet: DOR-DOR Hys
Timepoint	Replicate	Treatment	Count	Dilution	Cfu.ul	Cfu.ml
-0.25	1	Post secondary growth	31	3	4428.57	4.42857e+06
-0.25	1	Post secondary growth	32	3	4571.43	4.57143e+06
-0.25	1	Post secondary growth	30	3	4285.71	4.28571e+06
-0.25	1	Post secondary growth	33	3	4714.29	4.71429e+06
-0.25	2	Post secondary growth	29	3	4142.86	4.14286e+06
-0.25	2	Post secondary growth	32	3	4571.43	4.57143e+06
-0.25	2	Post secondary growth	26	3	3714.29	3.71429e+06
-0.25	2	Post secondary growth	37	3	5285.71	5.28571e+06
-0.25	3	Post secondary growth	36	3	5142.86	5.14286e+06
-0.25	3	Post secondary growth	29	3	4142.86	4.14286e+06
-0.25	3	Post secondary growth	34	3	4857.14	4.85714e+06
-0.25	3	Post secondary growth	29	3	4142.86	4.14286e+06
0	1	Antibiotic switch	17	3	2428.57	2.42857e+06
0	1	Antibiotic switch	33	3	4714.29	4.71429e+06
0	1	No antibiotic	31	3	4428.57	4.42857e+06
0	1	Pretreatment only	25	3	3571.43	3.57143e+06
0	1	Maintreatment only	23	3	3285.71	3.28571e+06
0	1	Antibiotic switch	16	3	2285.71	2.28571e+06
0	1	Pretreatment only	19	3	2714.29	2.71429e+06
0	1	Maintreatment only	28	3	4000	4000000
0	1	No antibiotic	42	3	6000	6000000
0	1	Maintreatment only	33	3	4714.29	4.71429e+06
0	1	Pretreatment only	24	3	3428.57	3.42857e+06
0	1	No antibiotic	33	3	4714.29	4.71429e+06
0	1	No antibiotic	30	3	4285.71	4.28571e+06
0	1	Pretreatment only	24	3	3428.57	3.42857e+06
0	1	Antibiotic switch	22	3	3142.86	3.14286e+06
0	1	Maintreatment only	38	3	5428.57	5.42857e+06
0	2	Antibiotic switch	22	3	3142.86	3.14286e+06
0	2	Antibiotic switch	24	3	3428.57	3.42857e+06
0	2	No antibiotic	34	3	4857.14	4.85714e+06
0	2	Pretreatment only	24	3	3428.57	3.42857e+06
0	2	Maintreatment only	26	3	3714.29	3.71429e+06
0	2	Antibiotic switch	23	3	3285.71	3.28571e+06
0	2	Pretreatment only	24	3	3428.57	3.42857e+06
0	2	Maintreatment only	33	3	4714.29	4.71429e+06
0	2	No antibiotic	19	3	2714.29	2.71429e+06
0	2	Maintreatment only	29	3	4142.86	4.14286e+06
0	2	Pretreatment only	30	3	4285.71	4.28571e+06
0	2	No antibiotic	30	3	4285.71	4.28571e+06
0	2	No antibiotic	45	3	6428.57	6.42857e+06
0	2	Pretreatment only	16	3	2285.71	2.28571e+06
0	2	Antibiotic switch	22	3	3142.86	3.14286e+06
0	2	Maintreatment only	30	3	4285.71	4.28571e+06
0	3	Antibiotic switch	36	3	5142.86	5.14286e+06
0	3	Antibiotic switch	20	3	2857.14	2.85714e+06
0	3	No antibiotic	37	3	5285.71	5.28571e+06
0	3	Pretreatment only	19	3	2714.29	2.71429e+06
0	3	Maintreatment only	34	3	4857.14	4.85714e+06
0	3	Antibiotic switch	17	3	2428.57	2.42857e+06
0	3	Pretreatment only	23	3	3285.71	3.28571e+06
0	3	Maintreatment only	28	3	4000	4000000
0	3	No antibiotic	43	3	6142.86	6.14286e+06
0	3	Maintreatment only	24	3	3428.57	3.42857e+06
0	3	Pretreatment only	22	3	3142.86	3.14286e+06
0	3	No antibiotic	38	3	5428.57	5.42857e+06
0	3	No antibiotic	24	3	3428.57	3.42857e+06
0	3	Pretreatment only	22	3	3142.86	3.14286e+06
0	3	Antibiotic switch	25	3	3571.43	3.57143e+06
0	3	Maintreatment only	37	3	5285.71	5.28571e+06
4	1	Antibiotic switch	30	3	4285.71	4.28571e+06
4	1	Antibiotic switch	16	3	2285.71	2.28571e+06
4	1	No antibiotic	30	5	428571	4.28571e+08
4	1	Pretreatment only	49	5	700000	700000000
4	1	Maintreatment only	8	4	11428.6	1.14286e+07
4	1	Antibiotic switch	36	3	5142.86	5.14286e+06
4	1	Pretreatment only	25	5	357143	3.57143e+08
4	1	Maintreatment only	5	4	7142.86	7.14286e+06
4	1	No antibiotic	38	5	542857	5.42857e+08
4	1	Maintreatment only	40	3	5714.29	5.71429e+06
4	1	Pretreatment only	44	5	628571	6.28571e+08
4	1	No antibiotic	46	5	657143	6.57143e+08
4	1	No antibiotic	27	5	385714	3.85714e+08
4	1	Pretreatment only	28	5	400000	400000000
4	1	Antibiotic switch	19	3	2714.29	2.71429e+06
4	1	Maintreatment only	30	3	4285.71	4.28571e+06
4	2	Antibiotic switch	38	3	5428.57	5.42857e+06
4	2	Antibiotic switch	26	3	3714.29	3.71429e+06
4	2	No antibiotic	31	5	442857	4.42857e+08
4	2	Pretreatment only	29	5	414286	4.14286e+08
4	2	Maintreatment only	5	4	7142.86	7.14286e+06
4	2	Antibiotic switch	31	3	4428.57	4.42857e+06
4	2	Pretreatment only	31	5	442857	4.42857e+08
4	2	Maintreatment only	39	3	5571.43	5.57143e+06
4	2	No antibiotic	33	5	471429	4.71429e+08
4	2	Maintreatment only	43	3	6142.86	6.14286e+06
4	2	Pretreatment only	31	5	442857	4.42857e+08
4	2	No antibiotic	31	5	442857	4.42857e+08
4	2	No antibiotic	28	5	400000	400000000
4	2	Pretreatment only	27	5	385714	3.85714e+08
4	2	Antibiotic switch	23	3	3285.71	3.28571e+06
4	2	Maintreatment only	7	4	10000	10000000
4	3	Antibiotic switch	31	3	4428.57	4.42857e+06
4	3	Antibiotic switch	30	3	4285.71	4.28571e+06
4	3	No antibiotic	32	5	457143	4.57143e+08
4	3	Pretreatment only	24	5	342857	3.42857e+08
4	3	Maintreatment only	7	4	10000	10000000
4	3	Antibiotic switch	22	3	3142.86	3.14286e+06
4	3	Pretreatment only	26	5	371429	3.71429e+08
4	3	Maintreatment only	8	4	11428.6	1.14286e+07
4	3	No antibiotic	31	5	442857	4.42857e+08
4	3	Maintreatment only	46	3	6571.43	6.57143e+06
4	3	Pretreatment only	31	5	442857	4.42857e+08
4	3	No antibiotic	35	5	500000	500000000
4	3	No antibiotic	32	5	457143	4.57143e+08
4	3	Pretreatment only	38	5	542857	5.42857e+08
4	3	Antibiotic switch	21	3	3000	3000000
4	3	Maintreatment only	7	4	10000	10000000
8	1	Antibiotic switch	28	3	4000	4000000
8	1	Antibiotic switch	27	3	3857.14	3.85714e+06
8	1	No antibiotic	7	6	1000000	1000000000
8	1	Pretreatment only	9	6	1.28571e+06	1285714286
8	1	Maintreatment only	33	3	4714.29	4.71429e+06
8	1	Antibiotic switch	25	4	35714.3	3.57143e+07
8	1	Pretreatment only	10	6	1.42857e+06	1428571429
8	1	Maintreatment only	40	3	5714.29	5.71429e+06
8	1	No antibiotic	18	6	2.57143e+06	2571428571
8	1	Maintreatment only	45	3	6428.57	6.42857e+06
8	1	Pretreatment only	4	6	571429	5.71429e+08
8	1	No antibiotic	26	6	3.71429e+06	3714285714
8	1	No antibiotic	10	6	1.42857e+06	1428571429
8	1	Pretreatment only	17	6	2.42857e+06	2428571429
8	1	Antibiotic switch	8	4	11428.6	1.14286e+07
8	1	Maintreatment only	46	3	6571.43	6.57143e+06
8	2	Antibiotic switch	15	3	2142.86	2.14286e+06
8	2	Antibiotic switch	14	3	2000	2000000
8	2	No antibiotic	14	6	2000000	2000000000
8	2	Pretreatment only	14	6	2000000	2000000000
8	2	Maintreatment only	31	3	4428.57	4.42857e+06
8	2	Antibiotic switch	10	3	1428.57	1.42857e+06
8	2	Pretreatment only	10	6	1.42857e+06	1428571429
8	2	Maintreatment only	38	3	5428.57	5.42857e+06
8	2	No antibiotic	21	6	3000000	3000000000
8	2	Maintreatment only	7	4	10000	10000000
8	2	Pretreatment only	16	6	2.28571e+06	2285714286
8	2	No antibiotic	10	6	1.42857e+06	1428571429
8	2	No antibiotic	9	6	1.28571e+06	1285714286
8	2	Pretreatment only	20	6	2.85714e+06	2857142857
8	2	Antibiotic switch	15	3	2142.86	2.14286e+06
8	2	Maintreatment only	35	3	5000	5000000
8	3	Antibiotic switch	13	3	1857.14	1.85714e+06
8	3	Antibiotic switch	10	3	1428.57	1.42857e+06
8	3	No antibiotic	16	6	2.28571e+06	2285714286
8	3	Pretreatment only	14	6	2000000	2000000000
8	3	Maintreatment only	29	3	4142.86	4.14286e+06
8	3	Antibiotic switch	13	3	1857.14	1.85714e+06
8	3	Pretreatment only	10	6	1.42857e+06	1428571429
8	3	Maintreatment only	36	3	5142.86	5.14286e+06
8	3	No antibiotic	16	6	2.28571e+06	2285714286
8	3	Maintreatment only	34	3	4857.14	4.85714e+06
8	3	Pretreatment only	10	6	1.42857e+06	1428571429
8	3	No antibiotic	11	6	1.57143e+06	1571428571
8	3	No antibiotic	13	6	1.85714e+06	1857142857
8	3	Pretreatment only	13	6	1.85714e+06	1857142857
8	3	Antibiotic switch	9	3	1285.71	1.28571e+06
8	3	Maintreatment only	21	3	3000	3000000
