# Supplementary material for: High potency of sequential therapy with only β-lactam antibiotics
Source: eLife. 2021 Jul 28;10:e68876. doi: 10.7554/eLife.68876 (PMC8456660; doi:10.7554/eLife.68876)
Supplement: Figure 3—source data 1. [file elife-68876-fig3-data1.xlsx]

## Sheet: Fig3_A DOR-CAR Hys
Timepoint	Replicate	Treatment	Count	Dilution	Cfu.ul	Cfu.ml
-0.25	1	Post secondary growth	38	3	5428.57	5500000
-0.25	1	Post secondary growth	22	3	3142.86	3.64286e+06
-0.25	1	Post secondary growth	23	3	3285.71	3.64286e+06
-0.25	1	Post secondary growth	29	3	4142.86	4.21429e+06
-0.25	2	Post secondary growth	27	3	3857.14	4.64286e+06
-0.25	2	Post secondary growth	30	3	4285.71	4.14286e+06
-0.25	2	Post secondary growth	36	3	5142.86	4.42857e+06
-0.25	2	Post secondary growth	22	3	3142.86	3.14286e+06
-0.25	3	Post secondary growth	33	3	4714.29	5000000
-0.25	3	Post secondary growth	34	3	4857.14	4.57143e+06
-0.25	3	Post secondary growth	25	3	3571.43	3.85714e+06
-0.25	3	Post secondary growth	30	3	4285.71	5.07143e+06
0	1	Antibiotic switch	17	3	2428.57	3000000
0	1	Antibiotic switch	19	3	2714.29	2.42857e+06
0	1	No antibiotic	37	3	5285.71	4000000
0	1	Pretreatment only	23	3	3285.71	3.92857e+06
0	1	Maintreatment only	21	3	3000	3.64286e+06
0	1	Antibiotic switch	20	3	2857.14	2.57143e+06
0	1	Pretreatment only	29	3	4142.86	3.42857e+06
0	1	Maintreatment only	19	3	2714.29	3.21429e+06
0	1	No antibiotic	31	3	4428.57	4.07143e+06
0	1	Maintreatment only	32	3	4571.43	4.07143e+06
0	1	Pretreatment only	13	3	1857.14	1.92857e+06
0	1	No antibiotic	33	3	4714.29	3.92857e+06
0	1	No antibiotic	29	3	4142.86	3.78571e+06
0	1	Pretreatment only	16	3	2285.71	1.78571e+06
0	1	Antibiotic switch	12	3	1714.29	2.35714e+06
0	1	Maintreatment only	35	3	5000	4.14286e+06
0	2	Antibiotic switch	13	3	1857.14	1.64286e+06
0	2	Antibiotic switch	17	3	2428.57	2.28571e+06
0	2	No antibiotic	21	3	3000	3.85714e+06
0	2	Pretreatment only	13	3	1857.14	1.85714e+06
0	2	Maintreatment only	23	3	3285.71	3000000
0	2	Antibiotic switch	14	3	2000	2.21429e+06
0	2	Pretreatment only	20	3	2857.14	2.92857e+06
0	2	Maintreatment only	24	3	3428.57	3.64286e+06
0	2	No antibiotic	27	3	3857.14	3.71429e+06
0	2	Maintreatment only	25	3	3571.43	3.71429e+06
0	2	Pretreatment only	16	3	2285.71	2500000
0	2	No antibiotic	25	3	3571.43	3500000
0	2	No antibiotic	21	3	3000	3.35714e+06
0	2	Pretreatment only	17	3	2428.57	2.21429e+06
0	2	Antibiotic switch	22	3	3142.86	2.92857e+06
0	2	Maintreatment only	24	3	3428.57	3.07143e+06
0	3	Antibiotic switch	11	3	1571.43	1.14286e+06
0	3	Antibiotic switch	14	3	2000	1.85714e+06
0	3	No antibiotic	22	3	3142.86	3.71429e+06
0	3	Pretreatment only	17	3	2428.57	2.71429e+06
0	3	Maintreatment only	25	3	3571.43	3.71429e+06
0	3	Antibiotic switch	17	3	2428.57	2.21429e+06
0	3	Pretreatment only	25	3	3571.43	3.21429e+06
0	3	Maintreatment only	20	3	2857.14	3.07143e+06
0	3	No antibiotic	20	3	2857.14	3.28571e+06
0	3	Maintreatment only	26	3	3714.29	4000000
0	3	Pretreatment only	20	3	2857.14	2.57143e+06
0	3	No antibiotic	20	3	2857.14	3.35714e+06
0	3	No antibiotic	23	3	3285.71	4000000
0	3	Pretreatment only	20	3	2857.14	2.85714e+06
0	3	Antibiotic switch	17	3	2428.57	2.28571e+06
0	3	Maintreatment only	10	3	1428.57	2.14286e+06
4	1	Antibiotic switch	21	3	3000	2.78571e+06
4	1	Antibiotic switch	23	3	3285.71	2.85714e+06
4	1	No antibiotic	10	5	142857	2.07143e+08
4	1	Pretreatment only	19	5	271429	2.35714e+08
4	1	Maintreatment only	14	5	200000	2.14286e+08
4	1	Antibiotic switch	21	3	3000	16500000
4	1	Pretreatment only	20	5	285714	2.64286e+08
4	1	Maintreatment only	18	5	257143	2.21429e+08
4	1	No antibiotic	17	5	242857	2.57143e+08
4	1	Maintreatment only	11	5	157143	2.07143e+08
4	1	Pretreatment only	15	5	214286	2.28571e+08
4	1	No antibiotic	16	5	228571	2.28571e+08
4	1	No antibiotic	21	5	300000	250000000
4	1	Pretreatment only	17	5	242857	2.57143e+08
4	1	Antibiotic switch	16	3	2285.71	2.07143e+06
4	1	Maintreatment only	16	5	228571	2.28571e+08
4	2	Antibiotic switch	13	3	1857.14	2.28571e+06
4	2	Antibiotic switch	15	3	2142.86	2.14286e+06
4	2	No antibiotic	22	5	314286	3.07143e+08
4	2	Pretreatment only	19	5	271429	2.64286e+08
4	2	Maintreatment only	22	5	314286	3.07143e+08
4	2	Antibiotic switch	17	3	2428.57	2.14286e+06
4	2	Pretreatment only	16	5	228571	2.57143e+08
4	2	Maintreatment only	15	4	21428.6	2.42857e+07
4	2	No antibiotic	13	5	185714	200000000
4	2	Maintreatment only	17	4	24285.7	2.35714e+07
4	2	Pretreatment only	11	5	157143	2.07143e+08
4	2	No antibiotic	16	5	228571	2.28571e+08
4	2	No antibiotic	21	5	300000	350000000
4	2	Pretreatment only	15	5	214286	2.57143e+08
4	2	Antibiotic switch	12	3	1714.29	2000000
4	2	Maintreatment only	16	4	22857.1	2.57143e+07
4	3	Antibiotic switch	19	3	2714.29	2.78571e+06
4	3	Antibiotic switch	20	3	2857.14	2.64286e+06
4	3	No antibiotic	23	5	328571	3.28571e+08
4	3	Pretreatment only	14	5	200000	2.42857e+08
4	3	Maintreatment only	9	4	12857.1	8.57143e+06
4	3	Antibiotic switch	14	3	2000	2.07143e+06
4	3	Pretreatment only	19	5	271429	2.78571e+08
4	3	Maintreatment only	9	4	12857.1	1.78571e+07
4	3	No antibiotic	18	5	257143	1.38571e+08
4	3	Maintreatment only	9	4	12857.1	1.42857e+07
4	3	Pretreatment only	19	5	271429	2.85714e+08
4	3	No antibiotic	14	5	200000	2.35714e+08
4	3	No antibiotic	22	5	314286	3.07143e+08
4	3	Pretreatment only	17	5	242857	2.78571e+08
4	3	Antibiotic switch	12	3	1714.29	1.57143e+06
4	3	Maintreatment only	12	4	17142.9	1.71429e+07
8	1	Antibiotic switch	17	1	24.2857	23571.4
8	1	Antibiotic switch	15	1	21.4286	29285.7
8	1	No antibiotic	26	5	371429	3.42857e+08
8	1	Pretreatment only	21	5	300000	3.85714e+08
8	1	Maintreatment only	26	5	371429	3.35714e+08
8	1	Antibiotic switch	12	1	17.1429	20714.3
8	1	Pretreatment only	28	5	400000	4.07143e+08
8	1	Maintreatment only	20	5	285714	3.07143e+08
8	1	No antibiotic	22	5	314286	3.71429e+08
8	1	Maintreatment only	18	5	257143	2.85714e+08
8	1	Pretreatment only	26	5	371429	4.07143e+08
8	1	No antibiotic	26	5	371429	1185714286
8	1	No antibiotic	18	6	2.57143e+06	2714285714
8	1	Pretreatment only	14	6	2000000	2357142857
8	1	Antibiotic switch	10	1	14.2857	21428.6
8	1	Maintreatment only	22	5	314286	1442857143
8	2	Antibiotic switch	21	1	30	35000
8	2	Antibiotic switch	24	1	34.2857	35000
8	2	No antibiotic	30	5	428571	4.21429e+08
8	2	Pretreatment only	34	5	485714	3.92857e+08
8	2	Maintreatment only	20	4	28571.4	2.64286e+07
8	2	Antibiotic switch	24	1	34.2857	32857.1
8	2	Pretreatment only	32	5	457143	4.92857e+08
8	2	Maintreatment only	17	4	24285.7	2.21429e+07
8	2	No antibiotic	33	5	471429	4.92857e+08
8	2	Maintreatment only	17	4	24285.7	2.57143e+07
8	2	Pretreatment only	29	5	414286	400000000
8	2	No antibiotic	33	5	471429	5.21429e+08
8	2	No antibiotic	45	5	642857	1821428571
8	2	Pretreatment only	34	5	485714	5.21429e+08
8	2	Antibiotic switch	25	1	35.7143	36428.6
8	2	Maintreatment only	14	4	20000	2.35714e+07
8	3	Antibiotic switch	29	1	41.4286	40714.3
8	3	Antibiotic switch	31	1	44.2857	39285.7
8	3	No antibiotic	39	5	557143	5.14286e+08
8	3	Pretreatment only	44	5	628571	5.64286e+08
8	3	Maintreatment only	16	3	2285.71	1.92857e+06
8	3	Antibiotic switch	26	1	37.1429	37142.9
8	3	Pretreatment only	36	5	514286	450000000
8	3	Maintreatment only	37	3	5285.71	4.21429e+06
8	3	No antibiotic	34	5	485714	5.35714e+08
8	3	Maintreatment only	14	3	2000	1.85714e+06
8	3	Pretreatment only	33	5	471429	500000000
8	3	No antibiotic	30	5	428571	5.42857e+08
8	3	No antibiotic	14	6	2000000	1292857143
8	3	Pretreatment only	22	6	3.14286e+06	1835714286
8	3	Antibiotic switch	26	1	37.1429	33571.4
8	3	Maintreatment only	23	3	3285.71	3.28571e+06

## Sheet: Fig3_A CAR-DOR Hys
Timepoint	Replicate	Treatment	Count	Dilution	Cfu.ul	Cfu.ml
-0.25	1	Post secondary growth	23	3	3285.71	3.21429e+06
-0.25	1	Post secondary growth	19	3	2714.29	3.35714e+06
-0.25	1	Post secondary growth	21	3	3000	2.85714e+06
-0.25	1	Post secondary growth	26	3	3714.29	3.42857e+06
-0.25	2	Post secondary growth	16	3	2285.71	2.35714e+06
-0.25	2	Post secondary growth	18	3	2571.43	2.85714e+06
-0.25	2	Post secondary growth	25	3	3571.43	3.42857e+06
-0.25	2	Post secondary growth	27	3	3857.14	3.28571e+06
-0.25	3	Post secondary growth	24	3	3428.57	3.64286e+06
-0.25	3	Post secondary growth	21	3	3000	3.28571e+06
-0.25	3	Post secondary growth	20	3	2857.14	3.42857e+06
-0.25	3	Post secondary growth	19	3	2714.29	3.07143e+06
0	1	Antibiotic switch	36	3	5142.86	4.71429e+06
0	1	Antibiotic switch	28	3	4000	3500000
0	1	No antibiotic	11	4	15714.3	1.28571e+07
0	1	Pretreatment only	25	3	3571.43	3.14286e+06
0	1	Maintreatment only	30	3	4285.71	4.21429e+06
0	1	Antibiotic switch	26	3	3714.29	3.64286e+06
0	1	Pretreatment only	27	3	3857.14	4.28571e+06
0	1	Maintreatment only	30	3	4285.71	8.57143e+06
0	1	No antibiotic	31	3	4428.57	5.07143e+06
0	1	Maintreatment only	37	3	5285.71	5.14286e+06
0	1	Pretreatment only	31	3	4428.57	4.35714e+06
0	1	No antibiotic	28	3	4000	4.42857e+06
0	1	No antibiotic	32	3	4571.43	4.71429e+06
0	1	Pretreatment only	28	3	4000	4.35714e+06
0	1	Antibiotic switch	22	3	3142.86	3.28571e+06
0	1	Maintreatment only	34	3	4857.14	4.42857e+06
0	2	Antibiotic switch	21	3	3000	2.78571e+06
0	2	Antibiotic switch	32	3	4571.43	3.85714e+06
0	2	No antibiotic	28	3	4000	7.71429e+06
0	2	Pretreatment only	27	3	3857.14	3.92857e+06
0	2	Maintreatment only	9	4	12857.1	8.78571e+06
0	2	Antibiotic switch	18	3	2571.43	2.92857e+06
0	2	Pretreatment only	20	3	2857.14	3.14286e+06
0	2	Maintreatment only	5	4	7142.86	5.57143e+06
0	2	No antibiotic	36	3	5142.86	5.21429e+06
0	2	Maintreatment only	30	3	4285.71	4.35714e+06
0	2	Pretreatment only	31	3	4428.57	4000000
0	2	No antibiotic	34	3	4857.14	4.57143e+06
0	2	No antibiotic	30	3	4285.71	4.35714e+06
0	2	Pretreatment only	20	3	2857.14	3.28571e+06
0	2	Antibiotic switch	27	3	3857.14	4.21429e+06
0	2	Maintreatment only	35	3	5000	4.85714e+06
0	3	Antibiotic switch	28	3	4000	4.07143e+06
0	3	Antibiotic switch	29	3	4142.86	3.57143e+06
0	3	No antibiotic	7	4	10000	1.21429e+07
0	3	Pretreatment only	26	3	3714.29	3.21429e+06
0	3	Maintreatment only	36	3	5142.86	4.57143e+06
0	3	Antibiotic switch	21	3	3000	3.21429e+06
0	3	Pretreatment only	27	3	3857.14	3.42857e+06
0	3	Maintreatment only	8	4	11428.6	10000000
0	3	No antibiotic	35	3	5000	4500000
0	3	Maintreatment only	31	3	4428.57	4.71429e+06
0	3	Pretreatment only	19	3	2714.29	2.85714e+06
0	3	No antibiotic	7	4	10000	7.35714e+06
0	3	No antibiotic	20	4	28571.4	2.35714e+07
0	3	Pretreatment only	25	3	3571.43	3.64286e+06
0	3	Antibiotic switch	20	3	2857.14	3.07143e+06
0	3	Maintreatment only	25	3	3571.43	8.92857e+06
4	1	Antibiotic switch	14	3	2000	2.21429e+06
4	1	Antibiotic switch	27	3	3857.14	3.64286e+06
4	1	No antibiotic	11	5	157143	1.64286e+08
4	1	Pretreatment only	12	5	171429	1.78571e+08
4	1	Maintreatment only	34	3	4857.14	8.85714e+06
4	1	Antibiotic switch	15	3	2142.86	2.78571e+06
4	1	Pretreatment only	18	5	257143	2.21429e+08
4	1	Maintreatment only	13	4	18571.4	1.42857e+07
4	1	No antibiotic	12	5	171429	1.92857e+08
4	1	Maintreatment only	27	3	3857.14	8.35714e+06
4	1	Pretreatment only	17	5	242857	1.85714e+08
4	1	No antibiotic	11	5	157143	2.07143e+08
4	1	No antibiotic	10	5	142857	1.42857e+08
4	1	Pretreatment only	14	5	200000	1.85714e+08
4	1	Antibiotic switch	25	3	3571.43	3.28571e+06
4	1	Maintreatment only	10	4	14285.7	9.35714e+06
4	2	Antibiotic switch	27	3	3857.14	3.21429e+06
4	2	Antibiotic switch	31	3	4428.57	3.57143e+06
4	2	No antibiotic	15	5	214286	1.85714e+08
4	2	Pretreatment only	10	5	142857	1.35714e+08
4	2	Maintreatment only	15	4	21428.6	2.14286e+07
4	2	Antibiotic switch	23	3	3285.71	3.42857e+06
4	2	Pretreatment only	21	5	300000	2.85714e+08
4	2	Maintreatment only	14	4	20000	20000000
4	2	No antibiotic	8	5	114286	8.28571e+07
4	2	Maintreatment only	11	4	15714.3	1.42857e+07
4	2	Pretreatment only	9	5	128571	1.42857e+08
4	2	No antibiotic	11	5	157143	150000000
4	2	No antibiotic	8	5	114286	1.28571e+08
4	2	Pretreatment only	9	5	128571	1.64286e+08
4	2	Antibiotic switch	21	3	3000	2.78571e+06
4	2	Maintreatment only	30	3	4285.71	1.07143e+07
4	3	Antibiotic switch	25	3	3571.43	3.71429e+06
4	3	Antibiotic switch	29	3	4142.86	4000000
4	3	No antibiotic	28	4	40000	1.12857e+08
4	3	Pretreatment only	33	4	47142.9	4.57143e+07
4	3	Maintreatment only	15	4	21428.6	2.14286e+07
4	3	Antibiotic switch	6	4	8571.43	5.78571e+06
4	3	Pretreatment only	10	5	142857	2.21429e+08
4	3	Maintreatment only	15	4	21428.6	20000000
4	3	No antibiotic	9	5	128571	1.71429e+08
4	3	Maintreatment only	13	4	18571.4	1.15714e+07
4	3	Pretreatment only	9	5	128571	1.28571e+08
4	3	No antibiotic	8	5	114286	1.64286e+08
4	3	No antibiotic	19	5	271429	2.64286e+08
4	3	Pretreatment only	17	5	242857	2.28571e+08
4	3	Antibiotic switch	19	3	2714.29	2500000
4	3	Maintreatment only	34	3	4857.14	4.71429e+06
8	1	Antibiotic switch	8	3	1142.86	1.78571e+06
8	1	Antibiotic switch	10	3	1428.57	1500000
8	1	No antibiotic	29	5	414286	4.42857e+08
8	1	Pretreatment only	30	5	428571	8.57143e+08
8	1	Maintreatment only	28	3	4000	7.71429e+06
8	1	Antibiotic switch	15	3	2142.86	2.07143e+06
8	1	Pretreatment only	30	5	428571	4.21429e+08
8	1	Maintreatment only	14	4	20000	1.17143e+07
8	1	No antibiotic	37	5	528571	5.35714e+08
8	1	Maintreatment only	28	3	4000	4000000
8	1	Pretreatment only	7	6	1000000	6.85714e+08
8	1	No antibiotic	29	5	414286	450000000
8	1	No antibiotic	38	5	542857	2628571428
8	1	Pretreatment only	32	5	457143	1085714286
8	1	Antibiotic switch	14	3	2000	1.92857e+06
8	1	Maintreatment only	12	4	17142.9	11000000
8	2	Antibiotic switch	12	3	1714.29	1.57143e+06
8	2	Antibiotic switch	12	3	1714.29	1.57143e+06
8	2	No antibiotic	32	5	457143	4.21429e+08
8	2	Pretreatment only	33	5	471429	4.35714e+08
8	2	Maintreatment only	10	4	14285.7	15000000
8	2	Antibiotic switch	8	3	1142.86	1.07143e+06
8	2	Pretreatment only	9	6	1.28571e+06	1500000000
8	2	Maintreatment only	13	4	18571.4	1.78571e+07
8	2	No antibiotic	9	6	1.28571e+06	8.57143e+08
8	2	Maintreatment only	7	4	10000	9.78571e+07
8	2	Pretreatment only	33	5	471429	8.78571e+08
8	2	No antibiotic	34	5	485714	8.85714e+08
8	2	No antibiotic	29	5	414286	7.07143e+08
8	2	Pretreatment only	32	5	457143	9.42857e+08
8	2	Antibiotic switch
8	2	Maintreatment only	12	4	17142.9	1.22857e+08
8	3	Antibiotic switch	17	3	2428.57	2.42857e+06
8	3	Antibiotic switch	12	3	1714.29	2.28571e+06
8	3	No antibiotic	11	6	1.57143e+06	1571428571
8	3	Pretreatment only	11	6	1.57143e+06	1357142857
8	3	Maintreatment only	19	4	27142.9	2.57143e+07
8	3	Antibiotic switch			0	0
8	3	Pretreatment only	9	6	1.28571e+06	1071428572
8	3	Maintreatment only	15	4	21428.6	2.14286e+07
8	3	No antibiotic	29	5	414286	6.35714e+08
8	3	Maintreatment only	12	4	17142.9	1.92857e+07
8	3	Pretreatment only	25	5	357143	9.64286e+08
8	3	No antibiotic			0	0
8	3	No antibiotic	12	6	1.71429e+06	1500000000
8	3	Pretreatment only	30	5	428571	6.42857e+08
8	3	Antibiotic switch	16	3	2285.71	2.21429e+06
8	3	Maintreatment only	19	4	27142.9	2.57143e+07

## Sheet: Fig3_B
	Combination	Area under curve
1	CAR -> CAR	-0.0367703372131869
2	CAR -> CEF	-0.779787386237664
3	CAR -> DOR	-1.36463906980376
4	CEF -> CAR	0.218143060201284
5	CEF -> CEF	-0.799540529666375
6	CEF -> DOR	-0.222031784315573
7	DOR -> CAR	-4.93041943632333
8	DOR -> CEF	-0.147215790301261
9	DOR -> DOR	-0.0567403445860997
