# Supplementary material for: High potency of sequential therapy with only β-lactam antibiotics
Source: eLife. 2021 Jul 28;10:e68876. doi: 10.7554/eLife.68876 (PMC8456660; doi:10.7554/eLife.68876)
Supplement: Figure 4—source data 1. [file elife-68876-fig4-data1.xlsx]

## Sheet: Fig4_B
Antibiotic	num_nonselective_plates	num_selective_plates	selective_fraction	avg_cells_per_culture	resistance rate	CI,95,lower	CI,95,higher
CAR	60	60	2.06235e-05	2.20933e+10	2.38179e-06	2.11564e-06	2.65745e-06
CEF	60	60	2.06235e-05	2.20933e+10	2.91194e-07	2.23357e-07	3.70598e-07
DOR	60	60	2.06235e-05	2.20933e+10	1.5362e-07	1.09975e-07	2.06386e-07

## Sheet: Fig4_C
Antibiotic of origin	Number of mutants	Challenged against DOR				Challenged against CEF				Challenged against CAR
		Grown	Not grown	Fraction CR	Fraction S	Grown	Not grown	Fraction CR	Fraction S	Grown	Not grown	Fraction CR	Fraction S
DOR	59			1	0	40	19	0.677966	0.322034	42	17	0.711864	0.288136
CEF	60	30	30	0.5	0.5			1	0	56	4	0.933333	0.0666667
CAR	60	22	38	0.366667	0.633333	44	16	0.733333	0.266667			1	0
