# Supplementary material for: High potency of sequential therapy with only β-lactam antibiotics
Source: eLife. 2021 Jul 28;10:e68876. doi: 10.7554/eLife.68876 (PMC8456660; doi:10.7554/eLife.68876)
Supplement: Figure 5—source data 1. [file elife-68876-fig5-data1.xlsx]

## Sheet: Fig3_A
evoexp_ID	transfer	switches	switches_norm	irregularity	irregularity_norm	allhys	allhys_norm	drlevels	drlevels_norm	crlevels	crlevels_norm	survival	survival_norm	biomass_increase	biomass_increase_norm	mdr_car_dor_cef	mdr_norm
5	12	11		0	0	5.39299	0.0796361	1.13e-05	0.50495	6.97853	0	6	0.142857	0.367	1	1.41	0.635294
6	12	11	1	0	0	23.5069	1	1.13e-05	0.50495	7.28079	0.0871904	7	0.285714	0.084	0	1.325	0.568627
7	12	11	1	0	0	5.02763	0.0610724	1.13e-05	0.50495	7.2339	0.0736636	8	0.428571	0.135	0.180212	1.875	1
8	12	2	0	0	0	4.19101	0.0185638	1.13e-05	0.50495	10.0446	0.884452	12	1	0.275	0.674912	1.426	0.647843
9	12	2	0	0	0	8.38936	0.231881	1.13e-05	0.50495	10.4452	1	12	1	0.167	0.293286	0.665	0.0509804
10	12	2	0	0	0	3.82565	0	1.13e-05	0.50495	10.3	0.958116	10	0.714286	0.127	0.151943	1.092	0.385882
11	12	6	0.444444	11.7677	1	8.65226	0.245239	8.8e-06	0.229923	8.78983	0.52249	5	0	0.269	0.65371	1.07	0.368627
12	12	10	0.888889	7.16993	0.609291	18.5855	0.749945	8.94e-06	0.245325	7.14689	0.0485658	7	0.285714	0.088	0.0141343	0.893	0.229804
13	12	7	0.555556	4.56984	0.388339	14.8336	0.559312	1.12e-05	0.493949	8.13503	0.333605	8	0.428571	0.171	0.30742	1.236	0.498824
14	12	7	0.555556	7.16993	0.609291	10.0105	0.314249	1.56e-05	0.977998	8.10113	0.323827	8	0.428571	0.335	0.886926	1.356	0.592941
15	12	6	0.444444	11.7677	1	8.04009	0.214134	6.71e-06	0	8.43446	0.41998	5	0	0.185	0.35689	0.6	0
16	12	7	0.555556	9.00652	0.765362	7.91766	0.207914	1.58e-05	1	8.8565	0.541721	9	0.571429	0.091	0.024735	0.999	0.312941
