# Supplementary material for: High potency of sequential therapy with only β-lactam antibiotics
Source: eLife. 2021 Jul 28;10:e68876. doi: 10.7554/eLife.68876 (PMC8456660; doi:10.7554/eLife.68876)
Supplement: Table 1—source data 1. [file elife-68876-table1-data1.xlsx]

## Sheet: Coding_variants
	Treatment group	ID	Transfer isolated	Replicate	Position	Reference	Alternate	Depth	Type of change	Impact of change	Functional class of change	Codon change	Amino acid change	Protein length	Gene name	Coding/non-coding
1	Monotherapy	1	12	r1	5116490	A	C	32	NON_SYNONYMOUS_CODING	MODERATE	MISSENSE	gTg/gGg	V471G	579	ftsI	CODING
2			12	r2	5116490	A	C	25	NON_SYNONYMOUS_CODING	MODERATE	MISSENSE	gTg/gGg	V471G	579	ftsI	CODING
3			12	r3	5116490	A	C	8	NON_SYNONYMOUS_CODING	MODERATE	MISSENSE	gTg/gGg	V471G	579	ftsI	CODING
4		2	48	r1	5117177	T	C	7	NON_SYNONYMOUS_CODING	MODERATE	MISSENSE	aAc/aGc	N242S	579	ftsI	CODING
5			48	r2	5117177	T	C	55	NON_SYNONYMOUS_CODING	MODERATE	MISSENSE	aAc/aGc	N242S	579	ftsI	CODING
6			48	r3	5117177	T	C	11	NON_SYNONYMOUS_CODING	MODERATE	MISSENSE	aAc/aGc	N242S	579	ftsI	CODING
8		3	12	r1	1236378	T	G	38	NON_SYNONYMOUS_CODING	MODERATE	MISSENSE	Acc/Ccc	T157P	495	pepA	CODING
9			12	r2	1236378	T	G	33	NON_SYNONYMOUS_CODING	MODERATE	MISSENSE	Acc/Ccc	T157P	495	pepA	CODING
10			12	r3	1236378	T	G	35	NON_SYNONYMOUS_CODING	MODERATE	MISSENSE	Acc/Ccc	T157P	495	pepA	CODING
11	Fast Regular	5	12	r1	5116490	A	C	18	NON_SYNONYMOUS_CODING	MODERATE	MISSENSE	gTg/gGg	V471G	579	ftsI	CODING
12			12	r2	5116490	A	C	10	NON_SYNONYMOUS_CODING	MODERATE	MISSENSE	gTg/gGg	V471G	579	ftsI	CODING
13			12	r3	5116490	A	C	30	NON_SYNONYMOUS_CODING	MODERATE	MISSENSE	gTg/gGg	V471G	579	ftsI	CODING
14		6	12	r1	1551541	CT	C	17	FRAME_SHIFT	HIGH	NONE	aaa/	K26	212	nalD	CODING
15			12	r2	645949	C	CGCGAGA	5	CODON_INSERTION	MODERATE	NONE	agc/aTCTCGCgc	S379ISR	1245	rmcA	CODING
16			12	r2	1551541	CT	C	6	FRAME_SHIFT	HIGH	NONE	aaa/	K26	212	nalD	CODING
17			12	r3	1551541	CT	C	33	FRAME_SHIFT	HIGH	NONE	aaa/	K26	212	nalD	CODING
18		7	12	r1	4369994	G	A	17	NON_SYNONYMOUS_CODING	MODERATE	MISSENSE	Cgc/Tgc	R220C	448	phoQ	CODING
19			12	r2	4369994	G	A	49	NON_SYNONYMOUS_CODING	MODERATE	MISSENSE	Cgc/Tgc	R220C	448	phoQ	CODING
20			12	r3	4369994	G	A	39	NON_SYNONYMOUS_CODING	MODERATE	MISSENSE	Cgc/Tgc	R220C	448	phoQ	CODING
21	Slow Regular	8	12	r1	5116490	A	C	12	NON_SYNONYMOUS_CODING	MODERATE	MISSENSE	gTg/gGg	V471G	579	ftsI	CODING
22			12	r2	5116490	A	C	10	NON_SYNONYMOUS_CODING	MODERATE	MISSENSE	gTg/gGg	V471G	579	ftsI	CODING
23			12	r3	5116490	A	C	12	NON_SYNONYMOUS_CODING	MODERATE	MISSENSE	gTg/gGg	V471G	579	ftsI	CODING
24		9	12	r1	1235778	C	T	41	NON_SYNONYMOUS_CODING	MODERATE	MISSENSE	Gac/Aac	D357N	495	pepA	CODING
25			12	r2	1235778	C	T	33	NON_SYNONYMOUS_CODING	MODERATE	MISSENSE	Gac/Aac	D357N	495	pepA	CODING
26			12	r3	1235778	C	T	17	NON_SYNONYMOUS_CODING	MODERATE	MISSENSE	Gac/Aac	D357N	495	pepA	CODING
27		10	12	r1	1236378	T	G	26	NON_SYNONYMOUS_CODING	MODERATE	MISSENSE	Acc/Ccc	T157P	495	pepA	CODING
28			12	r1	1868179	G	GTGGCGGCCTGGATACCGA	17	CODON_CHANGE_PLUS_CODON_INSERTION	MODERATE	NONE	gag/gTGGCGGCCTGGATACCGAag	E115VAAWIPK	350	3-oxoacyl-ACP synthase	CODING
29			12	r1	1868183	T	TGGCCGAGGA	17	CODON_INSERTION	MODERATE	NONE	cag/GCCGAGGAGcag	Q117AEEQ	350	3-oxoacyl-ACP synthase	CODING
30			12	r2	1236378	T	G	27	NON_SYNONYMOUS_CODING	MODERATE	MISSENSE	Acc/Ccc	T157P	495	pepA	CODING
31			12	r2	3979085	G	A	6	NON_SYNONYMOUS_CODING	MODERATE	MISSENSE	Cgc/Tgc	R178C	289	zipA	CODING
32			12	r3	1236378	T	G	48	NON_SYNONYMOUS_CODING	MODERATE	MISSENSE	Acc/Ccc	T157P	495	pepA	CODING
33			12	r3	3972146	C	CGGCTCG	8	CODON_CHANGE_PLUS_CODON_INSERTION	MODERATE	NONE	ccg/ccCGAGCCg	P483PEP	701	dnaX	CODING
34			12	r3	3979085	G	A	39	NON_SYNONYMOUS_CODING	MODERATE	MISSENSE	Cgc/Tgc	R178C	289	zipA	CODING

## Sheet: Non-coding_variants
	Treatment group	ID	Sample name	Position	Reference	Alternate	Depth	Type of change	Impact of change	Functional class of change	Gene name	Coding/non-coding
1	Fast Regular	7	r2	4952927	A	AG	5	UPSTREAM	MODIFIER	NONE	23s ribosomal rRNA	NON_CODING
2			r2	4952931	A	AC	5	UPSTREAM	MODIFIER	NONE	23s ribosomal rRNA	NON_CODING
3			r2	4952941	C	CA	5	UPSTREAM	MODIFIER	NONE	23s ribosomal rRNA	NON_CODING
4			r2	4952950	A	AC	5	UPSTREAM	MODIFIER	NONE	23s ribosomal rRNA	NON_CODING
